# Supplementary material for: Proteome-wide structural analysis quantifies structural conservation across distant species
Source: HighWire-hosted journal article supplement (doi:10.1101/gr.277771.123), 2023-11-01
Supplement: Supplemental_Fig_S1.pdf [file Supplemental_Fig_S1.pdf]

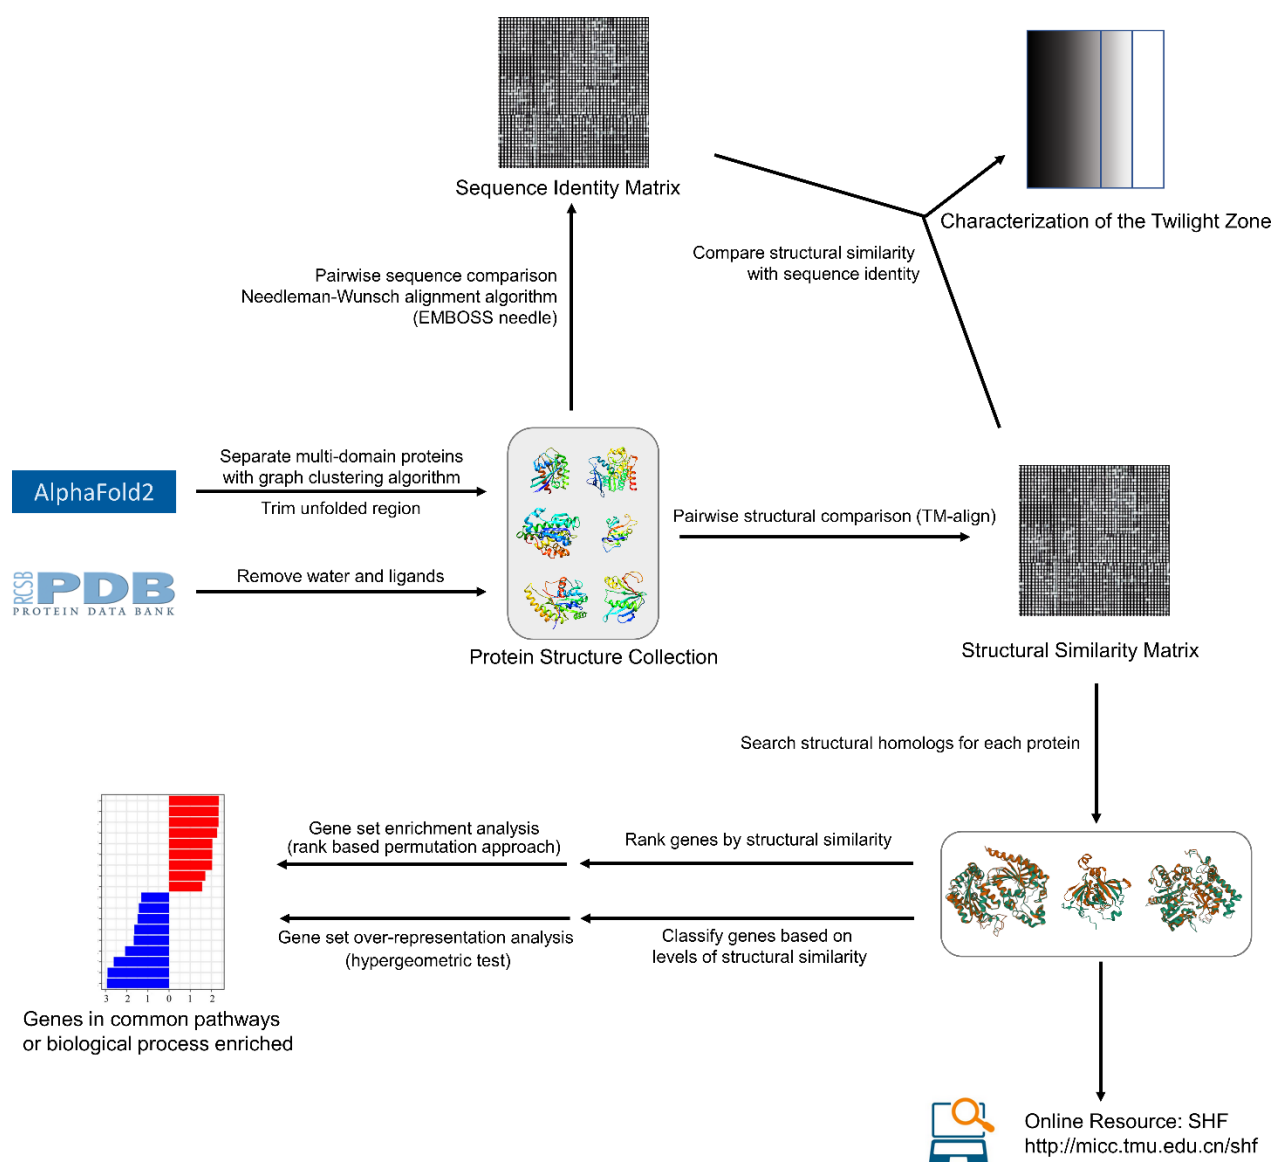

**Supplemental Figure S1. Schematic illustration of the workflow and methods used in this study.** Pairwise structural alignment was performed with each protein using TM-align. The similarity scores obtained from the alignments were used to portray the distribution of structural similarity and sequence identity, and to evaluate evolutionary conservatives at the protein structure level.
