# Supplementary material for: Proteome-wide structural analysis quantifies structural conservation across distant species
Source: HighWire-hosted journal article supplement (doi:10.1101/gr.277771.123), 2023-11-01
Supplement: Supplemental_Fig_S3.pdf [file Supplemental_Fig_S3.pdf]

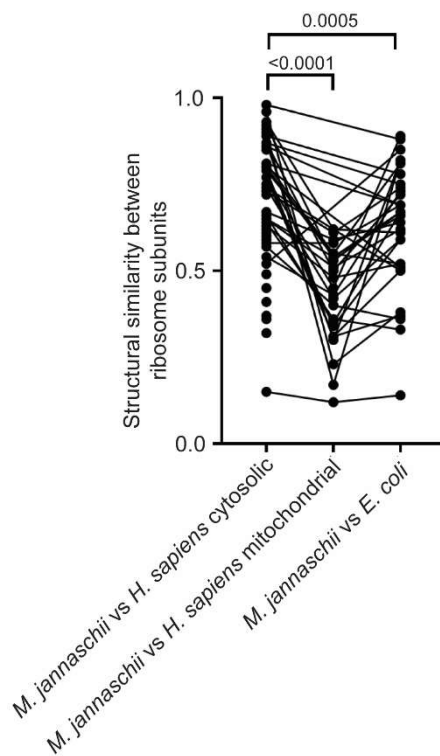

**Supplemental Figure S3. Structural similarities between ribosome subunits of *M. jannaschii* and their annotated orthologs from *H. sapiens* or *E. coli***

Structural similarities between ribosome orthologs were shown. Paired two-tailed t-tests were performed to examine whether the similarity scores were significantly different. Note that not all ribosome subunits in *M. jannaschii* have annotated orthologs in other species. Therefore, not all data points are paired.
