# Supplementary material for: Proteome-wide structural analysis quantifies structural conservation across distant species
Source: HighWire-hosted journal article supplement (doi:10.1101/gr.277771.123), 2023-11-01
Supplement: Supplemental_Fig_S4.pdf [file Supplemental_Fig_S4.pdf]

A

|                              | TM1                                                               | TM2                                |      |
|------------------------------|-------------------------------------------------------------------|------------------------------------|------|
| cdgl ( <i>E. coli</i> )      | YNENTNVKLIPOMNILMVVVALFFLNAVIFLFMLMKYFTN----                      | KQILPTLILSLAFISGLIYLVEITVI         | 141  |
| CELSR3 ( <i>H. sapiens</i> ) | RERLEGGDLELLAVFTHVVVAVSVAALVLTAAIILS---                           | LASLKS--NVRGIHANVAALGVAELLFLLGI    | 2593 |
| CELSR1 ( <i>H. sapiens</i> ) | SRRENGEVLPLKIVTYAAVSLSLAALLVAFVLLSL---                            | VRMLRS--NLHSIHKHLAVALFLSLQVLFVIGI  | 2522 |
| CELSR2 ( <i>H. sapiens</i> ) | SRRENGEILPLKTLTYVALGVTIAALLTFFFLT---                              | LAILRS--NQHGIRRNLTAAALGLAQLVFLFGI  | 2430 |
| GPR157 ( <i>H. sapiens</i> ) | SPPPETELVPSERAVVLLSCALSALGSGLLVATHAL---                           | WEDLRS--RARRLLEFLSLADLLSAASYFYGV   | 68   |
|                              | TM3                                                               | TM4                                |      |
| cdgl ( <i>E. coli</i> )      | IHKPINGSTLIQ--TKSNDVSIFYIFRQLSFICITLSALFCYGDNILD-----             | NNKKKTGILL                         | 198  |
| CELSR3 ( <i>H. sapiens</i> ) | HRT-----HNQLVCTAVAILLHYFFLSTFAWLFVQGLHLYRMQVEPRNVD--              | RGAMRFYHALGWG                      | 2651 |
| CELSR1 ( <i>H. sapiens</i> ) | NQT-----ENPFCLCTVVAILLHYIYMSTFAWTLVESHVYRMLTEVRNID--              | TGPMRFYYVVGWG                      | 2580 |
| CELSR2 ( <i>H. sapiens</i> ) | NQA-----DLPFACTVIAILLHFLYLCITFSWALLEALHLYRALTEVRDYN--             | TGPMRFYYMLGWG                      | 2488 |
| GPR157 ( <i>H. sapiens</i> ) | LQNF-----AGPSWDQVLCQALSTFANTSSFFWTVAIALYLYLSTVRAARGPRTDRLLWAFHVVS | SWG                                | 130  |
|                              | TM4                                                               | TM5                                |      |
| cdgl ( <i>E. coli</i> )      | LALIPFLVFPFLAHNLSYNADYS-----                                      | LYVVDYCPDNHTATWGINYTKILVCLWAFLLFFI | 256  |
| CELSR3 ( <i>H. sapiens</i> ) | VPAVILGLAVGLDPEG--YGNPDFCWISVH-----                               | EPLIWSFAGPVVLVIVMNGTMFLLAAR        | 2706 |
| CELSR1 ( <i>H. sapiens</i> ) | IPAVVTGLAVGLDPOG--YGNPDFCWLSLQ-----                               | DTLIWSFAGPIGAVIIINTVTSVLSAK        | 2635 |
| CELSR2 ( <i>H. sapiens</i> ) | VPAFITGLAVGLDPEG--YGNPDFCWLSIY-----                               | DTLIWSFAGPVAFVAVSMSVFLYILAAR       | 2543 |
| GPR157 ( <i>H. sapiens</i> ) | VPLVITVAVALKKIG--YDASDVSVGWCWIDLEAK-----                          | DHVLWMLLTGKLWEMLAYVLLPLLYLL        | 191  |
|                              | TM6                                                               |                                    |      |
| cdgl ( <i>E. coli</i> )      | IMRTRLAS-----                                                     | ELWPLIALLCCLASTCCNLLLLTLDEYNY----- | 292  |
| CELSR3 ( <i>H. sapiens</i> ) | TSCSTGQ-R-----                                                    | EAKKTSALTIRSSFLLLLLVSAWLFGLL-----  | 2745 |
| CELSR1 ( <i>H. sapiens</i> ) | VSCQRKH-HY-----                                                   | YGKKGIVSLRLTAFLLLLSATWLLGLL-----   | 2675 |
| CELSR2 ( <i>H. sapiens</i> ) | ASCAAQR-QG-----                                                   | FEKKGPSVGLQPSFAVLLLSATWLLALL-----  | 2583 |
| GPR157 ( <i>H. sapiens</i> ) | VRKHINR-AHTALSEYRPIILSQEHRLRLRHSMAKKLVLIPLIFTGLRVWST-----         | VRFVLTLCGSP                        | 253  |
|                              | TM7                                                               |                                    |      |
| cdgl ( <i>E. coli</i> )      | ---TIWYISRGIEVSSKLFVVSFLIYNIFQ-ELQLSSKLAVHD                       |                                    | 331  |
| CELSR3 ( <i>H. sapiens</i> ) | NHSILAFHYLHAGLCGLQGLAVLLLCVNLADARAAMWPACLG                        |                                    | 2788 |
| CELSR1 ( <i>H. sapiens</i> ) | NRDALSFHYLFAITSGLOGPFVLLFHCVLNQEVKRLKGLVGG                        |                                    | 2718 |
| CELSR2 ( <i>H. sapiens</i> ) | NSDTLLFHYLFATNCIQGPFIFLSYVVLSSKEVRKALKLACSR                       |                                    | 2626 |
| GPR157 ( <i>H. sapiens</i> ) | AVQTPVLVLHGIGNTFQGGANCIMFVLCTRAVTRLFLSCLCC                        |                                    | 296  |

B

|                             | TM1                                                                      | TM2                                              |     |
|-----------------------------|--------------------------------------------------------------------------|--------------------------------------------------|-----|
| dgcT ( <i>E. coli</i> )     | WFNQPQ--VEEVVPRSTYLMVMIALFFIDTVAFIFMQLYFIYDR-----                        | RQFSNCVLSLAFLISCLIFYVI                           | 90  |
| RXFP1 ( <i>H. sapiens</i> ) | NTDITSSLENLLASIIQRFVFWVVSATCFGNIFVICMRFYIRSE---                          | NKLYAMSIISLCCADCLMGIIYL                          | 458 |
| VN1R5 ( <i>H. sapiens</i> ) | CENFPSKMIKLPGFITTIQIFFYPOASFGISANTLLLFHIFTFVESHRSKSIDMIISHLSLHILLETO     |                                                  | 98  |
| VN1R1 ( <i>H. sapiens</i> ) | NQHPIDDFEAMAGKVKSGISFLIQTGVGILGNSFLLCFYNLILFTGHKLRPTDLILSQLALANSVMVLEFFK |                                                  | 101 |
| VN1R3 ( <i>H. sapiens</i> ) | -----MASKDFAIGMILLSOIMVGFLGNFFLLYHYSLFCFTRGMLOSTDILKHLTIANSVLILSK        |                                                  | 61  |
| VN1R2 ( <i>H. sapiens</i> ) | LHSLVSAHGEKPTKPVGLDPTLFQVVGILGNFSLLYYMFYFRGYKPRSTDILRLHLTADSLVILSK       |                                                  | 142 |
| VN1R4 ( <i>H. sapiens</i> ) | -----MASRYVAVGMILSQTVVGVLGSESVLLHLYSFYCTGCRLRSTDILIVKHLIVANFLAIRCK       |                                                  | 60  |
|                             | TM2                                                                      | TM3                                              |     |
| dgcT ( <i>E. coli</i> )     | TVIIIQQTIEERLTSS-----                                                    | VVQNDIAIYYLFRMSLCILIFLALVNKVSSEN-----            | 138 |
| RXFP1 ( <i>H. sapiens</i> ) | FVIGGFDLKF-RGEYNKHAQLWMESTHCQLVGSALISTEVSVLLLTFLTLEKYICIVYPFR-----       | CVR                                              | 522 |
| VN1R5 ( <i>H. sapiens</i> ) | AIIIVSLDFFG-SQNTQ-----                                                   | DDLRYKVIVFLKVMRGLSICTPCLLSVLQAIISPSIFSLAK--LKH   | 158 |
| VN1R1 ( <i>H. sapiens</i> ) | GIPQTMAAFQ-LKYLL-----                                                    | NDTGCKFFVYHRVGTTRVSLSTICLNGFQAIKNPSICKWME--IKI   | 162 |
| VN1R3 ( <i>H. sapiens</i> ) | GIPQTMAAFQ-LKDSL-----                                                    | SDIGCKFFVYVHRVGRVAVCVGNACLLSVFQVITISPSEFRWAEIKLH | 123 |
| VN1R2 ( <i>H. sapiens</i> ) | RIPETMATFG-LKHFD-----                                                    | NYFGCKFLLYAHRVGRGVSIGSTCLLSVFQVITINPRNSRWAE--MKV | 203 |
| VN1R4 ( <i>H. sapiens</i> ) | GVPQTMAAFQ-VRYFL-----                                                    | NALGCKLVFYLHRVGRGVSIGTCLLSVFQVITVSSRKSRLWAK--LKE | 121 |
|                             | TM4                                                                      |                                                  |     |
| dgcT ( <i>E. coli</i> )     | -TKQRNLFSSKMTLCISLFFVFGGPIVAHILSHSYESYN-----                             | LHIAELTNENGQVVKAS                                | 194 |
| RXFP1 ( <i>H. sapiens</i> ) | PGKCRITIVLILWIITGFIVAFIPLSNKEFFK-NYYGTNGVCFPLHSED-TESIGAQIYSVAIFLGINLA   |                                                  | 590 |
| VN1R5 ( <i>H. sapiens</i> ) | PSASHILGFFFLSWVLNMFIVIFCCTLRLLP-LVKRGQSSVCHT-----                        | ALFLFAHELHPQETVFHTND                             | 221 |
| VN1R1 ( <i>H. sapiens</i> ) | RSRPRIDFCCLLCWAPHVLMNASVLLLVNGLPL--SKNSSAKNNYGCYSY-KASKRFSSLHAVIYFSPDFM  |                                                  | 230 |
| VN1R3 ( <i>H. sapiens</i> ) | AHKYIRSFILVLCWILNTLVNITVLLHVTGKW--NSINSTNDYGYCSGGSRSRIPHSILHVLSSLDVL     |                                                  | 192 |
| VN1R2 ( <i>H. sapiens</i> ) | KAPTYYIGLSNLCWAFHMLVNAIFPIYTTGKW--SNNNITKKGDLYGCSAPLSDEVTKSVYAALTSTFHDVL |                                                  | 272 |
| VN1R4 ( <i>H. sapiens</i> ) | KAPKHVGSVLLCWIVCMLVNIIFPMYVTGKW--NYTNITVNEDLYGCSGGGNKIAQTLRAMLLSFDPVL    |                                                  | 190 |
|                             | TM5                                                                      | TM6                                              |     |
| dgcT ( <i>E. coli</i> )     | YVTIMIFMWLTLLSVNLYENG-----                                               | LYRDIWNGVTVIAFCVLYNLSLLFMSRY                     | 244 |
| RXFP1 ( <i>H. sapiens</i> ) | AFIIIVFSYGSMEFYSVHQSAITATE-----                                          | RNOVKKEMILAKRFFIFIVFDALCWEIFVVKFL                | 650 |
| VN1R5 ( <i>H. sapiens</i> ) | FEGCHLYRVHGPIKRLHGDYFIQTIRGYLSAFTQPA--CPRVSPVKRASQAILLLVSFVFTYVWDFTSFSG  |                                                  | 291 |
| VN1R1 ( <i>H. sapiens</i> ) | SLGFMVWASGSMVFLLYRHKQOVQHNSNRL-----                                      | SCRPSQEARATHIMVLVSVFVYFVSHSFTITW                 | 295 |
| VN1R3 ( <i>H. sapiens</i> ) | CLGLMLTLAGSGMVFILHRHKQOVQHIHGT-----                                      | NLSARSSPESRVITQSILVLVSLCYFTRSPPSLH               | 255 |
| VN1R2 ( <i>H. sapiens</i> ) | CLGLMLWASSSIVLVLYRHKQOVQHIHGRNNI-----                                    | YPNSSPGNRAIQSILALVSTFALCYALSFTIYVY               | 337 |
| VN1R4 ( <i>H. sapiens</i> ) | CLGLMLWVSSSMVCILHRHKQOVQHIHGRSDI-----                                    | SPRASPENRATQSILILVSTFVSSYTLSCLEQVC               | 255 |
|                             | TM7                                                                      |                                                  |     |
| dgcT ( <i>E. coli</i> )     | SVS-----TWYISRTIEVVSKLTVMVIFMCHIFSALRVTKNIAH--DP                         |                                                  | 286 |
| RXFP1 ( <i>H. sapiens</i> ) | SLLQVEIPGTITTSWVVIFILPINSALNPILYTLTRPFEKEMIHFRWFYNYR                     |                                                  | 700 |
| VN1R5 ( <i>H. sapiens</i> ) | GVT--WINDSLLVWLOVIVANSYAAISPLMLIYADNQIFKTLQMLWFXYL                       |                                                  | 339 |
| VN1R1 ( <i>H. sapiens</i> ) | TTIV-VANPGQWIVTNSVLVASCFFPARSPFVILMSDTHISOFCFACRTRKT                     |                                                  | 344 |
| VN1R3 ( <i>H. sapiens</i> ) | MSL--FPNPSWWLLNTSALITACFPMVSPFVLMRHRPRLGSAACCGRNP                        |                                                  | 304 |
| VN1R2 ( <i>H. sapiens</i> ) | LAL--FDNSSWWLVNTAALIIACFPPTISPFVLMCRDPSRRLCSICCRNNR                      |                                                  | 386 |
| VN1R4 ( <i>H. sapiens</i> ) | MAL-LDNPNSSLVNTSALMSVCFPTLSPFVLMSCDPSVYRFFCFWAKR---                      |                                                  | 301 |

**Supplemental Figure S4. Sequence alignment between *E. coli* cdgI and dgcT with human GPCR proteins**

The 7TM domains of cdgI (A) and dgcT (B) of *E. coli* were aligned with a collection of human GPCRs. The sequence alignment was performed by incorporating the cdgI and dgcT sequences to the existing alignment result of 846 human GPCR proteins using ClustalX2. (PLoS Comput. Biol. **2016**, 12(3), e1004805) The established alignment of human GPCR proteins was generated using a structure-guided sequence alignment method. The figure displays the human GPCR proteins that align best to cdgI and dgcT within the multiple sequence alignment file. The color indicates residue groups (blue, hydrophobic; red, positive charge; magenta, negative charge; green, polar).
