# Supplementary material for: Proteome-wide structural analysis quantifies structural conservation across distant species
Source: HighWire-hosted journal article supplement (doi:10.1101/gr.277771.123), 2023-11-01
Supplement: Supplemental_Fig_S5.pdf [file Supplemental_Fig_S5.pdf]

A

**SHF**

Structural Homolog Finder: find a structural homolog for a gene in another organism.

Source Organism: Homo sapiens

Target Organism: Escherichia coli

Search gene name or Uniprot ID

B

| P40939                                                                                                                                                                                                                                                                       |                                     |            |                     |
|------------------------------------------------------------------------------------------------------------------------------------------------------------------------------------------------------------------------------------------------------------------------------|-------------------------------------|------------|---------------------|
| (1) Homolog Protein P77399: Fatty acid oxidation complex subunit alpha [Includes: Enoyl-CoA hydratase/3-hydroxybutyryl-CoA epimerase (EC 4.2.1.17) (EC 5.1.2.3); 3-hydroxyacyl-CoA dehydrogenase (EC 1.1.1.35)]                                                              |                                     |            |                     |
| Queried Protein Structure                                                                                                                                                                                                                                                    | Homolog Protein Structure           | Similarity |                     |
| AlphaFold Structure P40939 36-762 aa                                                                                                                                                                                                                                         | Protein Data Bank 6Y5V 1-714 aa     | 93.1%      | Visualize Alignment |
| AlphaFold Structure P40939 36-762 aa                                                                                                                                                                                                                                         | AlphaFold Structure P77399 3-706 aa | 93.0%      | Visualize Alignment |
| (2) Homolog Protein P21177: Fatty acid oxidation complex subunit alpha [Includes: Enoyl-CoA hydratase/Delta(3)-cis-Delta(2)-trans-enoyl-CoA isomerase/3-hydroxybutyryl-CoA epimerase (EC 4.2.1.17) (EC 5.1.2.3) (EC 5.3.3.8); 3-hydroxyacyl-CoA dehydrogenase (EC 1.1.1.35)] |                                     |            |                     |
| Queried Protein Structure                                                                                                                                                                                                                                                    | Homolog Protein Structure           | Similarity |                     |
| AlphaFold Structure P40939 36-762 aa                                                                                                                                                                                                                                         | AlphaFold Structure P21177 1-720 aa | 89.9%      | Visualize Alignment |
| (3) Homolog Protein P76083: 3-hydroxyadipyl-CoA dehydrogenase (EC 1.1.1.-)                                                                                                                                                                                                   |                                     |            |                     |
| Queried Protein Structure                                                                                                                                                                                                                                                    | Homolog Protein Structure           | Similarity |                     |
| AlphaFold Structure P40939 36-762 aa                                                                                                                                                                                                                                         | AlphaFold Structure P76083 1-474 aa | 50.1%      | Visualize Alignment |

C

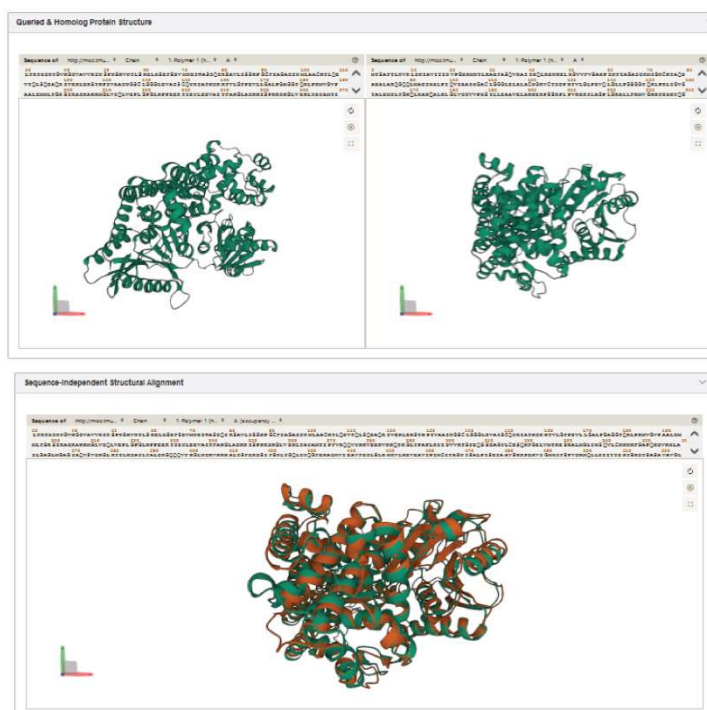

### Supplemental Figure S5. SHF: An online resource for Structural homolog Identification

(A) Screenshot for the input page

(B) Screenshot for an example of the output. A query for structural homologs of human HADHA (Uniprot ID: P40939) in *E. coli* proteomes returns three homologous proteins.

(C) Visualization of the structural alignment between the AlphaFold2 predicted structure of human HADHA and experimental structure *E. coli* fadJ (PDB ID:6Y5V)
