# Supplementary material for: Proteome-wide structural analysis quantifies structural conservation across distant species
Source: HighWire-hosted journal article supplement (doi:10.1101/gr.277771.123), 2023-11-01
Supplement: Supplemental_Table_S1.xlsx [file Supplemental_Table_S1.xlsx]

## Sheet: Structure_to_Sequence
Supplemental Table S1: Randomly selected pairs of experimental structures, along with their sequence similarity and structural similarity scores
Structure 1 (E. coli)	Structure 2 (H. sapiens)	Structural Similarity	Sequence Identity	Sequence Similarity	Gene 1 Symbol 1 (E. coli)	Gene 1 Full Name	Gene 2 Symbol (H. sapiens)	Gene 2 Full Name
2J1N	6GT6	0.096515	0.132	0.224	ompC	Outer membrane porin C (Outer membrane protein 1B) (Outer membrane protein C) (Porin OmpC)	F12	coagulation factor XII
3O1T	7B4E	0.08626	0.13	0.232	alkB	Alpha-ketoglutarate-dependent dioxygenase AlkB (EC 1.14.11.33) (Alkylated DNA repair protein AlkB) (DNA oxidative demethylase AlkB)	TP53	tumor protein p53
6POH	7OZB	0.092115	0.161	0.26	dsbA	Thiol:disulfide interchange protein DsbA	FGFR1	fibroblast growth factor receptor 1
5T4L	7OYJ	0.096325	0.131	0.227	aspC	Aspartate aminotransferase (AspAT) (EC 2.6.1.1) (Transaminase A)	TEAD2	TEA domain transcription factor 2
3LCW	7OYJ	0.090485	0.144	0.281	nanA	N-acetylneuraminate lyase (NAL) (Neu5Ac lyase) (EC 4.1.3.3) (N-acetylneuraminate pyruvate-lyase) (N-acetylneuraminic acid aldolase) (NALase) (Sialate lyase) (Sialic acid aldolase) (Sialic acid lyase)	TEAD2	TEA domain transcription factor 2
4ITX	6T8V	0.062105	0.145	0.264	metC	Cystathionine beta-lyase MetC (CBL) (CL) (EC 4.4.1.13) (Beta-cystathionase MetC) (Cysteine desulfhydrase MetC) (CD) (EC 4.4.1.28) (Cysteine lyase MetC) (Cysteine-S-conjugate beta-lyase MetC)	CFB	complement factor B
1F4C	8AO5	0.099395	0.155	0.277	thyA	Thymidylate synthase (TS) (TSase) (EC 2.1.1.45)	MAPK1	mitogen-activated protein kinase 1
6FWS	3E0N	0.085805	0.112	0.174	dinG	ATP-dependent DNA helicase DinG (EC 3.6.4.12)	PRSS8	serine protease 8
6CVM	7EDS	0.07373	0.07	0.107	lacZ	Beta-galactosidase (Beta-gal) (EC 3.2.1.23) (Lactase)	TP53	tumor protein p53
7ACM	7QFV	0.099635	0.147	0.262	rcdA	HTH-type transcriptional regulator RcdA (Regulator of csgD)	KLK6	kallikrein related peptidase 6
1S06	5A0A	0.077475	0.145	0.229	bioA	Adenosylmethionine-8-amino-7-oxononanoate aminotransferase (EC 2.6.1.62) (7,8-diamino-pelargonic acid aminotransferase) (DAPA AT) (DAPA aminotransferase) (7,8-diaminononanoate synthase) (DANS) (Diaminopelargonic acid synthase)	ELANE	elastase, neutrophil expressed
1ASF	3GYL	0.089565	0.138	0.249	aspC	Aspartate aminotransferase (AspAT) (EC 2.6.1.1) (Transaminase A)	PRSS8	serine protease 8
5EJ7	7EDS	0.09603	0.108	0.162	menD	2-succinyl-5-enolpyruvyl-6-hydroxy-3-cyclohexene-1-carboxylate synthase (SEPHCHC synthase) (EC 2.2.1.9) (Menaquinone biosynthesis protein MenD)	TP53	tumor protein p53
5FWR	7RDT	0.098745	0.132	0.233	fimH	Type 1 fimbrin D-mannose specific adhesin (Protein FimH)	NTHL1	nth like DNA glycosylase 1
6C3X	7SEA	0.063605	0.133	0.225	cysI	Sulfite reductase [NADPH] hemoprotein beta-component (SiR-HP) (SiRHP) (EC 1.8.1.2)	FBL	fibrillarin
2MAT	8AO5	0.09521	0.142	0.278	map	Methionine aminopeptidase (MAP) (MetAP) (EC 3.4.11.18) (Peptidase M)	MAPK1	mitogen-activated protein kinase 1
1A04	3E16	0.09897	0.147	0.246	narL	Nitrate/nitrite response regulator protein NarL	PRSS8	serine protease 8
4GON	8AO5	0.09682	0.139	0.284	dam	DNA adenine methylase (EC 2.1.1.72) (DNA adenine methyltransferase) (Deoxyadenosyl-methyltransferase) (Orphan methyltransferase M.EcoKDam) (M.EcoKDam)	MAPK1	mitogen-activated protein kinase 1
1JTS	7F8R	0.08121	0.124	0.279	dps	DNA protection during starvation protein (EC 1.16.-.-)	CLIC1	chloride intracellular channel 1
1AIQ	3FVF	0.09652	0.131	0.25	thyA	Thymidylate synthase (TS) (TSase) (EC 2.1.1.45)	PRSS8	serine protease 8
4S2C	7OYJ	0.097825	0.163	0.298	talB	Transaldolase B (EC 2.2.1.2)	TEAD2	TEA domain transcription factor 2
2ZAK	5A0A	0.098025	0.163	0.29	iaaA	Isoaspartyl peptidase (EC 3.4.19.5) (Beta-aspartyl-peptidase) (EcAIII) (Isoaspartyl dipeptidase) [Cleaved into: Isoaspartyl peptidase subunit alpha; Isoaspartyl peptidase subunit beta]	ELANE	elastase, neutrophil expressed
3SEY	5A0A	0.09176	0.118	0.232	malE	Maltose/maltodextrin-binding periplasmic protein (MMBP) (Maltodextrin-binding protein) (Maltose-binding protein) (MBP)	ELANE	elastase, neutrophil expressed
6QUG	7B4E	0.090315	0.112	0.213	malE	Maltose/maltodextrin-binding periplasmic protein (MMBP) (Maltodextrin-binding protein) (Maltose-binding protein) (MBP)	TP53	tumor protein p53
5QNX	1NQ9	0.091605	0.111	0.219	dsbA	Thiol:disulfide interchange protein DsbA	SERPINC1	serpin family C member 1
1HW5	8AO5	0.09339	0.112	0.245	crp	cAMP-activated global transcriptional regulator CRP (Catabolite activator protein) (CAP) (Catabolite gene activator) (cAMP receptor protein) (CRP) (cAMP regulatory protein)	MAPK1	mitogen-activated protein kinase 1
3DWN	3E0N	0.087365	0.129	0.234	fadL	Long-chain fatty acid transport protein (Outer membrane FadL protein) (Outer membrane flp protein)	PRSS8	serine protease 8
4X5I	6SNZ	0.09016	0.145	0.307	folA	Dihydrofolate reductase (EC 1.5.1.3)	LMNA	lamin A/C
3R0D	8AO5	0.08193	0.138	0.286	codA	Cytosine deaminase (CD) (CDA) (CDase) (EC 3.5.4.1) (Cytosine aminohydrolase) (Isoguanine deaminase) (EC 3.5.4.-)	MAPK1	mitogen-activated protein kinase 1
3VD5	7OZY	0.09233	0.087	0.145	lacZ	Beta-galactosidase (Beta-gal) (EC 3.2.1.23) (Lactase)	FGFR2	fibroblast growth factor receptor 2
1A8R	7B4E	0.095235	0.127	0.289	folE	GTP cyclohydrolase 1 (EC 3.5.4.16) (GTP cyclohydrolase I) (GTP-CH-I)	TP53	tumor protein p53
3SZU	7B4E	0.09475	0.116	0.245	ispH	4-hydroxy-3-methylbut-2-enyl diphosphate reductase (HMBPP reductase) (EC 1.17.7.4) (1-hydroxy-2-methyl-2-(E)-butenyl 4-diphosphate reductase)	TP53	tumor protein p53
3SGV	7B4N	0.096825	0.159	0.239	ispU	Ditrans,polycis-undecaprenyl-diphosphate synthase ((2E,6E)-farnesyl-diphosphate specific) (EC 2.5.1.31) (Ditrans,polycis-undecaprenylcistransferase) (Undecaprenyl diphosphate synthase) (UDS) (Undecaprenyl pyrophosphate synthase) (UPP synthase)	TP53	tumor protein p53
1F46	7EDS	0.09938	0.134	0.237	zipA	Cell division protein ZipA (FtsZ interacting protein A)	TP53	tumor protein p53
4PRV	7YBO	0.09296	0.158	0.303	gyrB	DNA gyrase subunit B (EC 5.6.2.2) (Type IIA topoisomerase subunit GyrB)	FGFR4	fibroblast growth factor receptor 4
5VJD	8DG6	0.099495	0.121	0.266	fbaA	Fructose-bisphosphate aldolase class 2 (FBP aldolase) (FBPA) (EC 4.1.2.13) (Fructose-1,6-bisphosphate aldolase) (Fructose-bisphosphate aldolase class II) (Sedoheptulose bisphosphate aldolase)	CFD	complement factor D
1SO5	7OYJ	0.08711	0.139	0.283	ulaD	3-keto-L-gulonate-6-phosphate decarboxylase UlaD (EC 4.1.1.85) (3-dehydro-L-gulonate-6-phosphate decarboxylase) (KGPDC) (L-ascorbate utilization protein D)	TEAD2	TEA domain transcription factor 2
7JZG	7OZY	0.097945	0.169	0.31	dapA	4-hydroxy-tetrahydrodipicolinate synthase (HTPA synthase) (EC 4.3.3.7)	FGFR2	fibroblast growth factor receptor 2
4MAT	8AO5	0.092315	0.13	0.286	map	Methionine aminopeptidase (MAP) (MetAP) (EC 3.4.11.18) (Peptidase M)	MAPK1	mitogen-activated protein kinase 1
1TT8	7OZB	0.099035	0.137	0.247	ubiC	Chorismate pyruvate-lyase (CL) (CPL) (EC 4.1.3.40)	FGFR1	fibroblast growth factor receptor 1
1LRL	7OYJ	0.090595	0.145	0.227	galE	UDP-glucose 4-epimerase (EC 5.1.3.2) (Galactowaldenase) (UDP-galactose 4-epimerase)	TEAD2	TEA domain transcription factor 2
1LDA	1NQ9	0.097475	0.127	0.208	glpF	Glycerol uptake facilitator protein (Aquaglyceroporin) (Glycerol facilitator)	SERPINC1	serpin family C member 1
7BRS	1NQ9	0.09304	0.112	0.207	lacZ	Beta-galactosidase (Beta-gal) (EC 3.2.1.23) (Lactase)	SERPINC1	serpin family C member 1
4Z9H	7B49	0.09273	0.137	0.32	tar	Methyl-accepting chemotaxis protein II (MCP-II) (Aspartate chemoreceptor protein)	TP53	tumor protein p53
1QTW	7B4E	0.09223	0.134	0.255	nfo	Endonuclease 4 (EC 3.1.21.2) (Endodeoxyribonuclease IV) (Endonuclease IV)	TP53	tumor protein p53
7Q32	7B49	0.09469	0.153	0.267	udp	Uridine phosphorylase (UPase) (UrdPase) (EC 2.4.2.3)	TP53	tumor protein p53
5JBN	7W3D	0.090335	0.106	0.224	coaD	Phosphopantetheine adenylyltransferase (EC 2.7.7.3) (Dephospho-CoA pyrophosphorylase) (Pantetheine-phosphate adenylyltransferase) (PPAT)	BRD4	bromodomain containing 4
1UCW	7UKZ	0.09407	0.152	0.34	talB	Transaldolase B (EC 2.2.1.2)	CDK11B	cyclin dependent kinase 11B
3FWN	3FVF	0.089875	0.149	0.236	gnd	6-phosphogluconate dehydrogenase, decarboxylating (EC 1.1.1.44)	PRSS8	serine protease 8
1ONO	7SEB	0.0831	0.133	0.278	dxr	1-deoxy-D-xylulose 5-phosphate reductoisomerase (DXP reductoisomerase) (EC 1.1.1.267) (1-deoxyxylulose-5-phosphate reductoisomerase) (2-C-methyl-D-erythritol 4-phosphate synthase)	FBL	fibrillarin
6BIE	7SE8	0.09851	0.105	0.218	spy	Periplasmic chaperone Spy (Spheroplast protein Y)	FBL	fibrillarin
3OCH	6SNZ	0.097915	0.145	0.307	folA	Dihydrofolate reductase (EC 1.5.1.3)	LMNA	lamin A/C
6ICD	7OZY	0.07901	0.154	0.317	icd	Isocitrate dehydrogenase [NADP] (IDH) (EC 1.1.1.42) (IDP) (NADP(+)-specific ICDH) (Oxalosuccinate decarboxylase)	FGFR2	fibroblast growth factor receptor 2
6PDH	6FDY	0.094925	0.148	0.284	dsbA	Thiol:disulfide interchange protein DsbA	ULK3	unc-51 like kinase 3
1RX3	6SNZ	0.097985	0.145	0.307	folA	Dihydrofolate reductase (EC 1.5.1.3)	LMNA	lamin A/C
6TEF	8AOE	0.096295	0.125	0.268	rutA	Pyrimidine monooxygenase RutA (EC 1.14.99.46)	MAPK1	mitogen-activated protein kinase 1
4PRX	1NQ9	0.096435	0.165	0.304	gyrB	DNA gyrase subunit B (EC 5.6.2.2) (Type IIA topoisomerase subunit GyrB)	SERPINC1	serpin family C member 1
2R4E	3E1X	0.08149	0.137	0.228	glpD	Aerobic glycerol-3-phosphate dehydrogenase (EC 1.1.5.3)	PRSS8	serine protease 8
5Z01	8AO5	0.09966	0.185	0.314	ldcA	Murein tetrapeptide carboxypeptidase (EC 3.4.17.13) (LD-carboxypeptidase A) (Muramoyltetrapeptide carboxypeptidase)	MAPK1	mitogen-activated protein kinase 1
1DC3	7B4N	0.097045	0.12	0.211	gapA	Glyceraldehyde-3-phosphate dehydrogenase A (GAPDH-A) (EC 1.2.1.12) (NAD-dependent glyceraldehyde-3-phosphate dehydrogenase)	TP53	tumor protein p53
5EJM	8AO5	0.09478	0.151	0.242	menD	2-succinyl-5-enolpyruvyl-6-hydroxy-3-cyclohexene-1-carboxylate synthase (SEPHCHC synthase) (EC 2.2.1.9) (Menaquinone biosynthesis protein MenD)	MAPK1	mitogen-activated protein kinase 1
1ANF	7SEA	0.09474	0.121	0.272	malE	Maltose/maltodextrin-binding periplasmic protein (MMBP) (Maltodextrin-binding protein) (Maltose-binding protein) (MBP)	FBL	fibrillarin
2BLS	7SE7	0.097085	0.156	0.269	ampC	Beta-lactamase (EC 3.5.2.6) (Cephalosporinase)	FBL	fibrillarin
5D56	7QSB	0.08347	0.136	0.28	dgkA	Diacylglycerol kinase (DAGK) (EC 2.7.1.107) (Diglyceride kinase) (DGK)	SCRIB	scribble planar cell polarity protein
2BWY	7B49	0.085785	0.124	0.208	pepP	Xaa-Pro aminopeptidase (EC 3.4.11.9) (Aminoacylproline aminopeptidase) (Aminopeptidase P II) (APP-II) (X-Pro aminopeptidase)	TP53	tumor protein p53
5QNB	7B4E	0.09641	0.082	0.263	dsbA	Thiol:disulfide interchange protein DsbA	TP53	tumor protein p53
1ZLZ	3KID	0.085715	0.161	0.278	sodA	Superoxide dismutase [Mn] (EC 1.15.1.1) (MnSOD)	PLAU	plasminogen activator, urokinase
1I2R	7EDS	0.09922	0.161	0.227	talB	Transaldolase B (EC 2.2.1.2)	TP53	tumor protein p53
1NXG	7SE7	0.091455	0.117	0.239	gltA	Citrate synthase (EC 2.3.3.16)	FBL	fibrillarin
1EXD	5A0A	0.083495	0.117	0.196	glnS	Glutamine--tRNA ligase (EC 6.1.1.18) (Glutaminyl-tRNA synthetase) (GlnRS)	ELANE	elastase, neutrophil expressed
1T75	7SEB	0.095755	0.144	0.326	can	Carbonic anhydrase 2 (EC 4.2.1.1) (Carbonate dehydratase 2)	FBL	fibrillarin
1INJ	3BSX	0.09281	0.155	0.262	ispD	2-C-methyl-D-erythritol 4-phosphate cytidylyltransferase (EC 2.7.7.60) (4-diphosphocytidyl-2C-methyl-D-erythritol synthase) (CDP-ME synthase) (MEP cytidylyltransferase) (MCT)	PUM1	pumilio RNA binding family member 1
4HAL	7QFV	0.097035	0.138	0.201	cueO	Multicopper oxidase CueO (MCO) (EC 1.16.3.4) (Blue copper oxidase CueO) (Copper efflux oxidase) (Cu efflux oxidase) (Cuprous oxidase)	KLK6	kallikrein related peptidase 6
5A60	7EDS	0.087935	0.116	0.216	ygiF	Inorganic triphosphatase (PPPase) (EC 3.6.1.25) (ORFXE)	TP53	tumor protein p53
5MCA	7UX0	0.09509	0.119	0.225	fimH	Type 1 fimbrin D-mannose specific adhesin (Protein FimH)	TMEM95	transmembrane protein 95
2PIC	8AO5	0.09293	0.145	0.305	mltA	Membrane-bound lytic murein transglycosylase A (EC 4.2.2.n1) (Mlt38) (Murein hydrolase A)	MAPK1	mitogen-activated protein kinase 1
1TPT	1NQ9	0.08772	0.147	0.312	deoA	Thymidine phosphorylase (EC 2.4.2.4) (TdRPase)	SERPINC1	serpin family C member 1
1RLT	7OYJ	0.096775	0.112	0.279	ybiV	Sugar phosphatase YbiV (EC 3.1.3.23)	TEAD2	TEA domain transcription factor 2
2QIV	7EDS	0.093755	0.177	0.267	lpxA	Acyl-[acyl-carrier-protein]--UDP-N-acetylglucosamine O-acyltransferase (UDP-N-acetylglucosamine acyltransferase) (EC 2.3.1.129)	TP53	tumor protein p53
5QLP	7B4E	0.091695	0.082	0.263	dsbA	Thiol:disulfide interchange protein DsbA	TP53	tumor protein p53
5HR7	7OYJ	0.096455	0.125	0.243	rlmN	Dual-specificity RNA methyltransferase RlmN (EC 2.1.1.192) (23S rRNA (adenine(2503)-C(2))-methyltransferase) (23S rRNA m2A2503 methyltransferase) (Ribosomal RNA large subunit methyltransferase N) (tRNA (adenine(37)-C(2))-methyltransferase) (tRNA m2A37 methyltransferase)	TEAD2	TEA domain transcription factor 2
3GX0	8AO5	0.09604	0.139	0.242	yfcG	Disulfide-bond oxidoreductase YfcG (EC 1.8.4.-) (GSH-dependent disulfide-bond oxidoreductase YfcG) (GST N1-1) (GST-like protein YfcG) (Organic hydroperoxidase) (EC 1.11.1.-)	MAPK1	mitogen-activated protein kinase 1
2E99	7OZY	0.092645	0.156	0.31	ispU	Ditrans,polycis-undecaprenyl-diphosphate synthase ((2E,6E)-farnesyl-diphosphate specific) (EC 2.5.1.31) (Ditrans,polycis-undecaprenylcistransferase) (Undecaprenyl diphosphate synthase) (UDS) (Undecaprenyl pyrophosphate synthase) (UPP synthase)	FGFR2	fibroblast growth factor receptor 2
5MHB	7B4E	0.09653	0.123	0.233	hemB	Delta-aminolevulinic acid dehydratase (ALAD) (ALADH) (EC 4.2.1.24) (Porphobilinogen synthase)	TP53	tumor protein p53
1FCO	8AO5	0.084035	0.169	0.305	ampC	Beta-lactamase (EC 3.5.2.6) (Cephalosporinase)	MAPK1	mitogen-activated protein kinase 1
1AHF	3GYL	0.080385	0.141	0.261	aspC	Aspartate aminotransferase (AspAT) (EC 2.6.1.1) (Transaminase A)	PRSS8	serine protease 8
1CG3	7OYJ	0.093035	0.137	0.225	purA	Adenylosuccinate synthetase (AMPSase) (AdSS) (EC 6.3.4.4) (IMP--aspartate ligase)	TEAD2	TEA domain transcription factor 2
4XN9	1E05	0.09167	0.13	0.239	pepN	Aminopeptidase N (EC 3.4.11.2) (Alpha-aminoacylpeptide hydrolase)	SERPINC1	serpin family C member 1
5QLC	7OZB	0.09062	0.161	0.26	dsbA	Thiol:disulfide interchange protein DsbA	FGFR1	fibroblast growth factor receptor 1
1KH5	7QFT	0.08004	0.15	0.226	phoA	Alkaline phosphatase (APase) (EC 3.1.3.1)	KLK6	kallikrein related peptidase 6
5QLV	7OZB	0.09643	0.161	0.26	dsbA	Thiol:disulfide interchange protein DsbA	FGFR1	fibroblast growth factor receptor 1
6KZV	7QSB	0.09513	0.121	0.216	gyrB	DNA gyrase subunit B (EC 5.6.2.2) (Type IIA topoisomerase subunit GyrB)	SCRIB	scribble planar cell polarity protein
1YT3	3KID	0.088605	0.151	0.249	rnd	Ribonuclease D (RNase D) (EC 3.1.13.5)	PLAU	plasminogen activator, urokinase
7NNX	7B4E	0.095855	0.142	0.279	nfsA	Oxygen-insensitive NADPH nitroreductase (EC 1.-.-.-) (Modulator of drug activity A)	TP53	tumor protein p53
4UUI	7S7A	0.09825	0.132	0.308	nanA	N-acetylneuraminate lyase (NAL) (Neu5Ac lyase) (EC 4.1.3.3) (N-acetylneuraminate pyruvate-lyase) (N-acetylneuraminic acid aldolase) (NALase) (Sialate lyase) (Sialic acid aldolase) (Sialic acid lyase)	CDK2	cyclin dependent kinase 2
1ZP3	7B4E	0.090295	0.149	0.25	metF	5,10-methylenetetrahydrofolate reductase (MTHFR) (EC 1.5.1.54) (NADH-dependent 5,10-methylenetetrahydrofolate reductase)	TP53	tumor protein p53
4JXV	7B4E	0.095645	0.131	0.253	ampC	Beta-lactamase (EC 3.5.2.6) (Cephalosporinase)	TP53	tumor protein p53
4WUB	6GT6	0.089365	0.148	0.239	gyrB	DNA gyrase subunit B (EC 5.6.2.2) (Type IIA topoisomerase subunit GyrB)	F12	coagulation factor XII
1YRR	8AO5	0.098385	0.188	0.313	nagA	N-acetylglucosamine-6-phosphate deacetylase (GlcNAc 6-P deacetylase) (EC 3.5.1.25)	MAPK1	mitogen-activated protein kinase 1
1LLS	7SE9	0.09197	0.135	0.272	malE	Maltose/maltodextrin-binding periplasmic protein (MMBP) (Maltodextrin-binding protein) (Maltose-binding protein) (MBP)	FBL	fibrillarin
1IXH	5TO6	0.14441	0.106	0.224	pstS	Phosphate-binding protein PstS (PBP)	TPR	translocated promoter region, nuclear basket protein
7EDC	4FPA	0.190765	0.086	0.138	trmH	tRNA (guanosine(18)-2'-O)-methyltransferase (EC 2.1.1.34) (tRNA [Gm18] methyltransferase)	HK1	hexokinase 1
3L9X	4DVI	0.19381	0.139	0.268	kefC	Glutathione-regulated potassium-efflux system protein KefC (K(+)/H(+) antiporter)	TNKS	tankyrase
1GSG	7XM5	0.18162	0.142	0.241	glnS	Glutamine--tRNA ligase (EC 6.1.1.18) (Glutaminyl-tRNA synthetase) (GlnRS)	KEAP1	kelch like ECH associated protein 1
1EN4	3E0N	0.1242	0.128	0.274	sodA	Superoxide dismutase [Mn] (EC 1.15.1.1) (MnSOD)	PRSS8	serine protease 8
4LPC	7U7B	0.19751	0.173	0.268	glgB	1,4-alpha-glucan branching enzyme GlgB (EC 2.4.1.18) (1,4-alpha-D-glucan:1,4-alpha-D-glucan 6-glucosyl-transferase) (Alpha-(1->4)-glucan branching enzyme) (Glycogen branching enzyme) (BE)	POLH	DNA polymerase eta
1XEY	1M8Z	0.19148	0.153	0.304	gadA	Glutamate decarboxylase alpha (GAD-alpha) (EC 4.1.1.15)	PUM1	pumilio RNA binding family member 1
1CQ7	7B9I	0.199835	0.165	0.306	aspC	Aspartate aminotransferase (AspAT) (EC 2.6.1.1) (Transaminase A)	NOTUM	notum, palmitoleoyl-protein carboxylesterase
2D33	3EG0	0.18787	0.035	0.063	gshA	Glutamate--cysteine ligase (EC 6.3.2.2) (Gamma-ECS) (GCS) (Gamma-glutamylcysteine synthetase)	ABL1	ABL proto-oncogene 1, non-receptor tyrosine kinase
2TSC	7AMA	0.19449	0.117	0.151	thyA	Thymidylate synthase (TS) (TSase) (EC 2.1.1.45)	IL17A	interleukin 17A
1SN8	1K4T	0.19272	0.062	0.083	rne	Ribonuclease E (RNase E) (EC 3.1.26.12)	TOP1	DNA topoisomerase I
1RX7	1GK4	0.15945	0.112	0.256	folA	Dihydrofolate reductase (EC 1.5.1.3)	VIM	vimentin
1I2K	7PPI	0.18707	0.137	0.238	pabC	Aminodeoxychorismate lyase (EC 4.1.3.38) (4-amino-4-deoxychorismate lyase) (ADC lyase) (ADCL)	NAMPT	nicotinamide phosphoribosyltransferase
1U40	5SAZ	0.1789	0.14	0.253	ispF	2-C-methyl-D-erythritol 2,4-cyclodiphosphate synthase (MECDP-synthase) (MECPP-synthase) (MECPS) (EC 4.6.1.12)	DDR1	discoidin domain receptor tyrosine kinase 1
1JZ2	7TSK	0.19156	0.131	0.189	lacZ	Beta-galactosidase (Beta-gal) (EC 3.2.1.23) (Lactase)	NOS3	nitric oxide synthase 3
3ECA	7UYS	0.18228	0.14	0.283	ansB	L-asparaginase 2 (EC 3.5.1.1) (L-asparaginase II) (L-ASNase II) (L-asparagine amidohydrolase II) (Colaspase)	TYK2	tyrosine kinase 2
2AU9	5TO6	0.175905	0.188	0.317	ppa	Inorganic pyrophosphatase (EC 3.6.1.1) (Pyrophosphate phospho-hydrolase) (PPase)	TPR	translocated promoter region, nuclear basket protein
4K22	1ZPB	0.18846	0.152	0.251	ubiI	2-octaprenylphenol hydroxylase (EC 1.14.13.240) (2-polyprenylphenol 6-hydroxylase)	F11	coagulation factor XI
4IR1	5NDU	0.199385	0.108	0.157	dinB	DNA polymerase IV (Pol IV) (EC 2.7.7.7) (Translesion synthesis polymerase IV) (TSL polymerase IV)	ENAH	ENAH actin regulator
4C5F	5SAX	0.19699	0.173	0.31	mltC	Membrane-bound lytic murein transglycosylase C (EC 4.2.2.n1) (Murein lyase C)	DDR1	discoidin domain receptor tyrosine kinase 1
2UYP	3G9L	0.18358	0.092	0.163	tdcF	Putative reactive intermediate deaminase TdcF (EC 3.5.4.-)	MAPK10	mitogen-activated protein kinase 10
1BJN	7S84	0.18428	0.155	0.28	serC	Phosphoserine aminotransferase (EC 2.6.1.52) (Phosphohydroxythreonine aminotransferase) (PSAT)	CDK2	cyclin dependent kinase 2
6PC9	5FA6	0.19902	0.1	0.163	dsbA	Thiol:disulfide interchange protein DsbA	POR	cytochrome p450 oxidoreductase
1LAX	7B4H	0.11848	0.132	0.232	malE	Maltose/maltodextrin-binding periplasmic protein (MMBP) (Maltodextrin-binding protein) (Maltose-binding protein) (MBP)	TP53	tumor protein p53
3KHC	1GU5	0.180495	0.082	0.135	alkB	Alpha-ketoglutarate-dependent dioxygenase AlkB (EC 1.14.11.33) (Alkylated DNA repair protein AlkB) (DNA oxidative demethylase AlkB)	CEBPB	CCAAT enhancer binding protein beta
3ISS	7POM	0.17529	0.167	0.274	murA	UDP-N-acetylglucosamine 1-carboxyvinyltransferase (EC 2.5.1.7) (Enoylpyruvate transferase) (UDP-N-acetylglucosamine enolpyruvyl transferase) (EPT)	CA9	carbonic anhydrase 9
2GA3	7OZY	0.115725	0.14	0.256	phoA	Alkaline phosphatase (APase) (EC 3.1.3.1)	FGFR2	fibroblast growth factor receptor 2
2OJP	5O5G	0.16501	0.194	0.301	dapA	4-hydroxy-tetrahydrodipicolinate synthase (HTPA synthase) (EC 4.3.3.7)	ROBO1	roundabout guidance receptor 1
5GXT	7SEC	0.11698	0.132	0.22	malE	Maltose/maltodextrin-binding periplasmic protein (MMBP) (Maltodextrin-binding protein) (Maltose-binding protein) (MBP)	FBL	fibrillarin
4IR1	7R9P	0.17571	0.157	0.318	dinB	DNA polymerase IV (Pol IV) (EC 2.7.7.7) (Translesion synthesis polymerase IV) (TSL polymerase IV)	MAP4K1	mitogen-activated protein kinase kinase kinase kinase 1
4PXD	7TSK	0.18939	0.158	0.291	allC	Allantoate amidohydrolase (AAH) (EC 3.5.3.9) (Allantoate deiminase)	NOS3	nitric oxide synthase 3
2FDH	5YB1	0.18398	0.096	0.167	alkB	Alpha-ketoglutarate-dependent dioxygenase AlkB (EC 1.14.11.33) (Alkylated DNA repair protein AlkB) (DNA oxidative demethylase AlkB)	ALB	albumin
5VHT	2J20	0.19727	0.112	0.199	pheA	Bifunctional chorismate mutase/prephenate dehydratase (Chorismate mutase-prephenate dehydratase) (P-protein) [Includes: Chorismate mutase (CM) (EC 5.4.99.5); Prephenate dehydratase (PDT) (EC 4.2.1.51)]	TP53	tumor protein p53
4D9K	6I8L	0.1652	0.128	0.202	ygeX	Diaminopropionate ammonia-lyase (DAPAL) (EC 4.3.1.15) (2,3-diaminopropionate ammonia-lyase) (Alpha,beta-diaminopropionate ammonia-lyase) (Diaminopropionatase)	SPIN1	spindlin 1
4KJJ	6FDY	0.186875	0.114	0.221	folA	Dihydrofolate reductase (EC 1.5.1.3)	ULK3	unc-51 like kinase 3
1XBY	5VZ3	0.196615	0.107	0.192	ulaD	3-keto-L-gulonate-6-phosphate decarboxylase UlaD (EC 4.1.1.85) (3-dehydro-L-gulonate-6-phosphate decarboxylase) (KGPDC) (L-ascorbate utilization protein D)	GDF15	growth differentiation factor 15
7CF7	4CRF	0.185565	0.134	0.256	rlmH	Ribosomal RNA large subunit methyltransferase H (EC 2.1.1.177) (23S rRNA (pseudouridine1915-N3)-methyltransferase) (23S rRNA m3Psi1915 methyltransferase) (rRNA (pseudouridine-N3-)-methyltransferase RlmH)	F11	coagulation factor XI
3Q7O	6UDI	0.18775	0.115	0.189	bamB	Outer membrane protein assembly factor BamB	MCL1	MCL1 apoptosis regulator, BCL2 family member
1X8R	2E50	0.193355	0.114	0.196	aroA	3-phosphoshikimate 1-carboxyvinyltransferase (EC 2.5.1.19) (5-enolpyruvylshikimate-3-phosphate synthase) (EPSP synthase) (EPSPS)	SET	SET nuclear proto-oncogene
1DI7	6V08	0.156775	0.145	0.228	mog	Molybdopterin adenylyltransferase (MPT adenylyltransferase) (EC 2.7.7.75)	APOH	apolipoprotein H
1WXI	4R07	0.177245	0.091	0.172	nadE	NH(3)-dependent NAD(+) synthetase (EC 6.3.1.5) (Nicotinamide adenine dinucleotide synthetase) (NADS) (Nitrogen regulatory protein)	TLR8	toll like receptor 8
1DOS	8AO5	0.110065	0.158	0.314	fbaA	Fructose-bisphosphate aldolase class 2 (FBP aldolase) (FBPA) (EC 4.1.2.13) (Fructose-1,6-bisphosphate aldolase) (Fructose-bisphosphate aldolase class II) (Sedoheptulose bisphosphate aldolase)	MAPK1	mitogen-activated protein kinase 1
3LCW	7Y3L	0.188855	0.068	0.099	nanA	N-acetylneuraminate lyase (NAL) (Neu5Ac lyase) (EC 4.1.3.3) (N-acetylneuraminate pyruvate-lyase) (N-acetylneuraminic acid aldolase) (NALase) (Sialate lyase) (Sialic acid aldolase) (Sialic acid lyase)	SALL3	spalt like transcription factor 3
1GL3	5VBD	0.196515	0.09	0.133	asd	Aspartate-semialdehyde dehydrogenase (ASA dehydrogenase) (ASADH) (EC 1.2.1.11) (Aspartate-beta-semialdehyde dehydrogenase)	USP9X	ubiquitin specific peptidase 9 X-linked
1QAL	5SE3	0.199585	0.128	0.205	tynA	Primary amine oxidase (EC 1.4.3.21) (2-phenylethylamine oxidase) (Copper amine oxidase) (Tyramine oxidase)	PDE10A	phosphodiesterase 10A
1THO	6FIW	0.19985	0.092	0.154	trxA	Thioredoxin 1 (Trx-1)	NT5C2	5'-nucleotidase, cytosolic II
2F2H	1X8Y	0.196035	0.037	0.054	yicI	Alpha-xylosidase (EC 3.2.1.177)	LMNA	lamin A/C
1ET0	7AAL	0.19781	0.139	0.31	pabC	Aminodeoxychorismate lyase (EC 4.1.3.38) (4-amino-4-deoxychorismate lyase) (ADC lyase) (ADCL)	PSTPIP1	proline-serine-threonine phosphatase interacting protein 1
2DBN	3I35	0.19602	0.052	0.082	ybiU	Uncharacterized protein YbiU	LASP1	LIM and SH3 protein 1
2FUA	7ZIJ	0.151235	0.177	0.274	fucA	L-fuculose phosphate aldolase (EC 4.1.2.17) (D-ribulose-phosphate aldolase) (L-fuculose-1-phosphate aldolase)	TPH1	tryptophan hydroxylase 1
4HTR	7OZY	0.189665	0.148	0.275	cysI	Sulfite reductase [NADPH] hemoprotein beta-component (SiR-HP) (SiRHP) (EC 1.8.1.2)	FGFR2	fibroblast growth factor receptor 2
1ANF	5IIT	0.18503	0.186	0.307	malE	Maltose/maltodextrin-binding periplasmic protein (MMBP) (Maltodextrin-binding protein) (Maltose-binding protein) (MBP)	MACROH2A1	macroH2A.1 histone
5QNG	5K9L	0.176065	0.148	0.212	dsbA	Thiol:disulfide interchange protein DsbA	BECN2	beclin 2
3K58	7PRK	0.170885	0.035	0.044	polB	DNA polymerase II (Pol II) (EC 2.7.7.7)	F12	coagulation factor XII
5CQJ	5AYF	0.192565	0.19	0.292	ispU	Ditrans,polycis-undecaprenyl-diphosphate synthase ((2E,6E)-farnesyl-diphosphate specific) (EC 2.5.1.31) (Ditrans,polycis-undecaprenylcistransferase) (Undecaprenyl diphosphate synthase) (UDS) (Undecaprenyl pyrophosphate synthase) (UPP synthase)	SETD7	SET domain containing 7, histone lysine methyltransferase
1DAF	7R7K	0.17133	0.152	0.293	bioD1	ATP-dependent dethiobiotin synthetase BioD 1 (EC 6.3.3.3) (DTB synthetase 1) (DTBS 1) (Dethiobiotin synthase 1)	ALK	ALK receptor tyrosine kinase
1KAG	1Z70	0.18903	0.124	0.204	aroK	Shikimate kinase 1 (SK 1) (EC 2.7.1.71) (Shikimate kinase I) (SKI)	SUMF1	sulfatase modifying factor 1
5CHY	6F63	0.16076	0.147	0.31	cheY	Chemotaxis protein CheY	SYCP1	synaptonemal complex protein 1
1C27	7UKR	0.12982	0.153	0.271	map	Methionine aminopeptidase (MAP) (MetAP) (EC 3.4.11.18) (Peptidase M)	SOS1	SOS Ras/Rac guanine nucleotide exchange factor 1
6DM8	5SIX	0.15927	0.121	0.267	malE	Maltose/maltodextrin-binding periplasmic protein (MMBP) (Maltodextrin-binding protein) (Maltose-binding protein) (MBP)	PDE10A	phosphodiesterase 10A
1IE3	7SEB	0.146255	0.156	0.303	mdh	Malate dehydrogenase (EC 1.1.1.37)	FBL	fibrillarin
5YO1	6LV1	0.19973	0.09	0.166	pepN	Aminopeptidase N (EC 3.4.11.2) (Alpha-aminoacylpeptide hydrolase)	CA2	carbonic anhydrase 2
1GTR	7B4N	0.11405	0.108	0.181	glnS	Glutamine--tRNA ligase (EC 6.1.1.18) (Glutaminyl-tRNA synthetase) (GlnRS)	TP53	tumor protein p53
2VB3	6R4F	0.196055	0.059	0.074	cusF	Cation efflux system protein CusF	GFPT1	glutamine--fructose-6-phosphate transaminase 1
3IXG	3UWN	0.19735	0.127	0.289	ampC	Beta-lactamase (EC 3.5.2.6) (Cephalosporinase)	L3MBTL1	L3MBTL histone methyl-lysine binding protein 1
3HXU	1E04	0.142365	0.146	0.316	alaS	Alanine--tRNA ligase (EC 6.1.1.7) (Alanyl-tRNA synthetase) (AlaRS)	SERPINC1	serpin family C member 1
1KVU	7U16	0.161515	0.106	0.196	galE	UDP-glucose 4-epimerase (EC 5.1.3.2) (Galactowaldenase) (UDP-galactose 4-epimerase)	TMEM106B	transmembrane protein 106B
1XJA	1SQY	0.18323	0.089	0.114	araC	Arabinose operon regulatory protein (HTH-type transcriptional regulator AraC)	LTF	lactotransferrin
7MQ6	5K28	0.199395	0.075	0.107	malE	Maltose/maltodextrin-binding periplasmic protein (MMBP) (Maltodextrin-binding protein) (Maltose-binding protein) (MBP)	MAP3K11	mitogen-activated protein kinase kinase kinase 11
5QNU	3ZD1	0.18677	0.125	0.234	dsbA	Thiol:disulfide interchange protein DsbA	CFHR2	complement factor H related 2
3IAQ	4AHH	0.193145	0.049	0.074	lacZ	Beta-galactosidase (Beta-gal) (EC 3.2.1.23) (Lactase)	ANG	angiogenin
2CG4	7NML	0.179905	0.1	0.293	asnC	Regulatory protein AsnC	LGALS1	galectin 1
4E8B	7B4N	0.11758	0.135	0.261	rsmE	Ribosomal RNA small subunit methyltransferase E (EC 2.1.1.193) (16S rRNA m3U1498 methyltransferase)	TP53	tumor protein p53
6ENI	1Z9M	0.19284	0.152	0.295	trpR	Trp operon repressor	CADM3	cell adhesion molecule 3
1EC7	8A66	0.14015	0.151	0.269	gudD	Glucarate dehydratase (GDH) (GlucD) (EC 4.2.1.40) (D-glucarate dehydratase)	STK3	serine/threonine kinase 3
2BWX	4BDW	0.189155	0.079	0.102	pepP	Xaa-Pro aminopeptidase (EC 3.4.11.9) (Aminoacylproline aminopeptidase) (Aminopeptidase P II) (APP-II) (X-Pro aminopeptidase)	F12	coagulation factor XII
5ETO	4BK0	0.199595	0.144	0.25	folK	2-amino-4-hydroxy-6-hydroxymethyldihydropteridine pyrophosphokinase (EC 2.7.6.3) (6-hydroxymethyl-7,8-dihydropterin pyrophosphokinase) (PPPK) (7,8-dihydro-6-hydroxymethylpterin-pyrophosphokinase) (HPPK)	RECQL5	RecQ like helicase 5
1USI	4WZR	0.19774	0.168	0.296	livK	Leucine-specific-binding protein (L-BP) (LS-BP)	PUM3	pumilio RNA binding family member 3
9ICD	7Y3M	0.190205	0.06	0.08	icd	Isocitrate dehydrogenase [NADP] (IDH) (EC 1.1.1.42) (IDP) (NADP(+)-specific ICDH) (Oxalosuccinate decarboxylase)	SALL4	spalt like transcription factor 4
1G79	6Y3J	0.1996	0.137	0.261	pdxH	Pyridoxine/pyridoxamine 5'-phosphate oxidase (EC 1.4.3.5) (PNP/PMP oxidase) (PNPOx) (Pyridoxal 5'-phosphate synthase)	DTX2	deltex E3 ubiquitin ligase 2
1ASF	7OXL	0.1888	0.16	0.279	aspC	Aspartate aminotransferase (AspAT) (EC 2.6.1.1) (Transaminase A)	SMOX	spermine oxidase
1EHC	7SE9	0.15443	0.1	0.218	cheY	Chemotaxis protein CheY	FBL	fibrillarin
4ELX	7UAO	0.19405	0.149	0.266	menB	1,4-dihydroxy-2-naphthoyl-CoA synthase (DHNA-CoA synthase) (EC 4.1.3.36)	NOS3	nitric oxide synthase 3
4XN2	7QS1	0.197715	0.078	0.115	pepN	Aminopeptidase N (EC 3.4.11.2) (Alpha-aminoacylpeptide hydrolase)	TRIM11	tripartite motif containing 11
4XN7	1BFF	0.19614	0.065	0.097	pepN	Aminopeptidase N (EC 3.4.11.2) (Alpha-aminoacylpeptide hydrolase)	FGF2	fibroblast growth factor 2
1ZCP	4Q5V	0.1931	0.05	0.074	trxA	Thioredoxin 1 (Trx-1)	POLA1	DNA polymerase alpha 1, catalytic subunit
4R98	3CJJ	0.199115	0.176	0.313	feoB	Fe(2+) transporter FeoB (Ferrous iron transport protein B)	AGER	advanced glycosylation end-product specific receptor
7VTD	7QRY	0.15557	0.117	0.239	psuK	Pseudouridine kinase (EC 2.7.1.83)	MID1	midline 1
2BB7	8DYF	0.18429	0.12	0.181	map	Methionine aminopeptidase (MAP) (MetAP) (EC 3.4.11.18) (Peptidase M)	IL17A	interleukin 17A
5QMT	7D4P	0.19701	0.082	0.146	dsbA	Thiol:disulfide interchange protein DsbA	TRPC5	transient receptor potential cation channel subfamily C member 5
2FW0	7S7A	0.136415	0.154	0.295	mglB	D-galactose/methyl-galactoside binding periplasmic protein MglB (D-galactose-binding periplasmic protein) (GBP) (D-galactose/D-glucose-binding protein) (GGBP)	CDK2	cyclin dependent kinase 2
1CQ6	3QNI	0.19227	0.15	0.28	aspC	Aspartate aminotransferase (AspAT) (EC 2.6.1.1) (Transaminase A)	PACSIN1	protein kinase C and casein kinase substrate in neurons 1
3KEM	2FE5	0.184935	0.11	0.19	ispH	4-hydroxy-3-methylbut-2-enyl diphosphate reductase (HMBPP reductase) (EC 1.17.7.4) (1-hydroxy-2-methyl-2-(E)-butenyl 4-diphosphate reductase)	DLG3	discs large MAGUK scaffold protein 3
3FSU	2FXO	0.17556	0.133	0.227	metF	5,10-methylenetetrahydrofolate reductase (MTHFR) (EC 1.5.1.54) (NADH-dependent 5,10-methylenetetrahydrofolate reductase)	MYH7	myosin heavy chain 7
3NSC	1F2L	0.19196	0.057	0.085	cueO	Multicopper oxidase CueO (MCO) (EC 1.16.3.4) (Blue copper oxidase CueO) (Copper efflux oxidase) (Cu efflux oxidase) (Cuprous oxidase)	CX3CL1	C-X3-C motif chemokine ligand 1
4KB0	5LFN	0.17914	0.161	0.249	rnt	Ribonuclease T (EC 3.1.13.-) (Exoribonuclease T) (RNase T)	CHAD	chondroadherin
4ISK	2BOU	0.1871	0.134	0.216	thyA	Thymidylate synthase (TS) (TSase) (EC 2.1.1.45)	ADGRE2	adhesion G protein-coupled receptor E2
1KJI	7NML	0.156695	0.105	0.159	purT	Formate-dependent phosphoribosylglycinamide formyltransferase (EC 6.3.1.21) (5'-phosphoribosylglycinamide transformylase 2) (Formate-dependent GAR transformylase) (GAR transformylase 2) (GART 2) (GAR transformylase T) (Non-folate glycinamide ribonucleotide transformylase) (Phosphoribosylglycinamide formyltransferase 2)	LGALS1	galectin 1
5KNT	6BC9	0.19797	0.161	0.264	hpt	Hypoxanthine phosphoribosyltransferase (HPRT) (EC 2.4.2.8) (6-oxopurine phosphoribosyltransferase) (6-oxopurine PRTase)	CA2	carbonic anhydrase 2
7LSM	1E04	0.14782	0.096	0.205	dsbA	Thiol:disulfide interchange protein DsbA	SERPINC1	serpin family C member 1
3O1P	6YZK	0.259445	0.15	0.255	alkB	Alpha-ketoglutarate-dependent dioxygenase AlkB (EC 1.14.11.33) (Alkylated DNA repair protein AlkB) (DNA oxidative demethylase AlkB)	CA2	carbonic anhydrase 2
3ILL	3V8S	0.28762	0.121	0.187	folK	2-amino-4-hydroxy-6-hydroxymethyldihydropteridine pyrophosphokinase (EC 2.7.6.3) (6-hydroxymethyl-7,8-dihydropterin pyrophosphokinase) (PPPK) (7,8-dihydro-6-hydroxymethylpterin-pyrophosphokinase) (HPPK)	ROCK1	Rho associated coiled-coil containing protein kinase 1
1RF7	2O63	0.264805	0.124	0.258	folA	Dihydrofolate reductase (EC 1.5.1.3)	PIM1	Pim-1 proto-oncogene, serine/threonine kinase
1DTY	5PHL	0.29717	0.17	0.271	bioA	Adenosylmethionine-8-amino-7-oxononanoate aminotransferase (EC 2.6.1.62) (7,8-diamino-pelargonic acid aminotransferase) (DAPA AT) (DAPA aminotransferase) (7,8-diaminononanoate synthase) (DANS) (Diaminopelargonic acid synthase)	KDM4D	lysine demethylase 4D
7O9I	7KKN	0.24161	0.142	0.26	ffh	Signal recognition particle protein (Fifty-four homolog) (Ffh) (p48)	TNKS	tankyrase
2P50	3X05	0.255225	0.135	0.272	nagA	N-acetylglucosamine-6-phosphate deacetylase (GlcNAc 6-P deacetylase) (EC 3.5.1.25)	PIP4K2B	phosphatidylinositol-5-phosphate 4-kinase type 2 beta
3IPO	5ILV	0.2466	0.075	0.117	ynjE	Thiosulfate sulfurtransferase YnjE (EC 2.8.1.1)	ETV5	ETS variant transcription factor 5
5CGB	6UXN	0.228085	0.132	0.277	fimH	Type 1 fimbrin D-mannose specific adhesin (Protein FimH)	BAK1	BCL2 antagonist/killer 1
3L1T	2FMZ	0.21653	0.157	0.248	nrfA	Cytochrome c-552 (EC 1.7.2.2) (Ammonia-forming cytochrome c nitrite reductase) (Cytochrome c nitrite reductase)	CA2	carbonic anhydrase 2
1MI4	6I7H	0.24122	0.161	0.291	aroA	3-phosphoshikimate 1-carboxyvinyltransferase (EC 2.5.1.19) (5-enolpyruvylshikimate-3-phosphate synthase) (EPSP synthase) (EPSPS)	FICD	FIC domain protein adenylyltransferase
1JBK	7B63	0.27441	0.153	0.281	clpB	Chaperone protein ClpB (Heat shock protein F84.1)	NUDT15	nudix hydrolase 15
3H4R	5RAR	0.236825	0.129	0.281	recE	Exodeoxyribonuclease 8 (EC 3.1.11.-) (Exodeoxyribonuclease VIII) (EXO VIII)	KDM3B	lysine demethylase 3B
6FWR	7AVC	0.212225	0.073	0.12	dinG	ATP-dependent DNA helicase DinG (EC 3.6.4.12)	PIH1D1	PIH1 domain containing 1
5ETK	1QMN	0.264375	0.109	0.224	folK	2-amino-4-hydroxy-6-hydroxymethyldihydropteridine pyrophosphokinase (EC 2.7.6.3) (6-hydroxymethyl-7,8-dihydropterin pyrophosphokinase) (PPPK) (7,8-dihydro-6-hydroxymethylpterin-pyrophosphokinase) (HPPK)	SERPINA3	serpin family A member 3
1OMP	1YUO	0.299815	0.152	0.261	malE	Maltose/maltodextrin-binding periplasmic protein (MMBP) (Maltodextrin-binding protein) (Maltose-binding protein) (MBP)	UNG	uracil DNA glycosylase
1MW9	5CQI	0.26679	0.097	0.165	topA	DNA topoisomerase 1 (EC 5.6.2.1) (DNA topoisomerase I) (Omega-protein) (Relaxing enzyme) (Swivelase) (Untwisting enzyme)	APOBEC3B	apolipoprotein B mRNA editing enzyme catalytic subunit 3B
1N2Z	1TBT	0.2086	0.159	0.3	btuF	Vitamin B12-binding protein	CA2	carbonic anhydrase 2
4I02	6CUA	0.266835	0.149	0.293	crp	cAMP-activated global transcriptional regulator CRP (Catabolite activator protein) (CAP) (Catabolite gene activator) (cAMP receptor protein) (CRP) (cAMP regulatory protein)	POLB	DNA polymerase beta
1GTR	5UPF	0.25395	0.134	0.299	glnS	Glutamine--tRNA ligase (EC 6.1.1.18) (Glutaminyl-tRNA synthetase) (GlnRS)	NAMPT	nicotinamide phosphoribosyltransferase
2Q7W	6FZT	0.254855	0.1	0.161	aspC	Aspartate aminotransferase (AspAT) (EC 2.6.1.1) (Transaminase A)	SMAD9	SMAD family member 9
5CKE	6YWU	0.209635	0.098	0.18	mazF	Endoribonuclease toxin MazF (EC 3.1.27.-) (Toxin MazF) (mRNA interferase MazF)	UMPS	uridine monophosphate synthetase
2GUF	3EKR	0.22123	0.111	0.196	btuB	Vitamin B12 transporter BtuB (Cobalamin receptor) (Outer membrane cobalamin translocator)	HSP90AA1	heat shock protein 90 alpha family class A member 1
1TYF	4K88	0.248525	0.102	0.198	clpP	ATP-dependent Clp protease proteolytic subunit (EC 3.4.21.92) (Caseinolytic protease) (Endopeptidase Clp) (Heat shock protein F21.5) (Protease Ti)	EPRS1	glutamyl-prolyl-tRNA synthetase 1
5YUZ	8E8V	0.215165	0.143	0.285	dinB	DNA polymerase IV (Pol IV) (EC 2.7.7.7) (Translesion synthesis polymerase IV) (TSL polymerase IV)	AASS	aminoadipate-semialdehyde synthase
3VA3	5G55	0.24162	0.085	0.131	rnt	Ribonuclease T (EC 3.1.13.-) (Exoribonuclease T) (RNase T)	PIK3CG	phosphatidylinositol-4,5-bisphosphate 3-kinase catalytic subunit gamma
1NJG	4AGN	0.272015	0.152	0.284	dnaX	DNA polymerase III subunit tau (EC 2.7.7.7) (DNA polymerase III subunit gamma)	TP53	tumor protein p53
1TZP	2VGB	0.25087	0.104	0.201	mepA	Penicillin-insensitive murein endopeptidase (EC 3.4.24.-) (D-alanyl-D-alanine-endopeptidase) (DD-endopeptidase)	PKLR	pyruvate kinase L/R
5MCA	4DYY	0.270505	0.148	0.352	fimH	Type 1 fimbrin D-mannose specific adhesin (Protein FimH)	FTH1	ferritin heavy chain 1
1PV2	5MRI	0.236415	0.098	0.164	hchA	Protein/nucleic acid deglycase 1 (EC 3.1.2.-) (EC 3.5.1.-) (EC 3.5.1.124) (Glyoxalase III) (EC 4.2.1.130) (Holding molecular chaperone) (Hsp31) (Maillard deglycase)	SORT1	sortilin 1
1PV2	5SK0	0.253035	0.163	0.297	hchA	Protein/nucleic acid deglycase 1 (EC 3.1.2.-) (EC 3.5.1.-) (EC 3.5.1.124) (Glyoxalase III) (EC 4.2.1.130) (Holding molecular chaperone) (Hsp31) (Maillard deglycase)	PDE10A	phosphodiesterase 10A
5W3Q	1IP6	0.28688	0.154	0.272	folA	Dihydrofolate reductase (EC 1.5.1.3)	LYZ	lysozyme
1GGF	7A1M	0.245395	0.134	0.207	katE	Catalase HPII (EC 1.11.1.6) (Hydroxyperoxidase II)	HIF1AN	hypoxia inducible factor 1 subunit alpha inhibitor
2R46	7TSL	0.26312	0.136	0.277	glpD	Aerobic glycerol-3-phosphate dehydrogenase (EC 1.1.5.3)	NOS3	nitric oxide synthase 3
3RV4	7D2V	0.284085	0.143	0.287	accC	Biotin carboxylase (EC 6.3.4.14) (Acetyl-coenzyme A carboxylase biotin carboxylase subunit A)	BACE1	beta-secretase 1
1U1F	1OKL	0.261505	0.157	0.261	udp	Uridine phosphorylase (UPase) (UrdPase) (EC 2.4.2.3)	CA2	carbonic anhydrase 2
1N8N	6EHK	0.27601	0.143	0.267	aphA	Class B acid phosphatase (CBAP) (EC 3.1.3.2)	CSNK2A1	casein kinase 2 alpha 1
6KZV	7C7G	0.25305	0.137	0.299	gyrB	DNA gyrase subunit B (EC 5.6.2.2) (Type IIA topoisomerase subunit GyrB)	AKR1C3	aldo-keto reductase family 1 member C3
1HQ2	5DOG	0.23498	0.158	0.263	folK	2-amino-4-hydroxy-6-hydroxymethyldihydropteridine pyrophosphokinase (EC 2.7.6.3) (6-hydroxymethyl-7,8-dihydropterin pyrophosphokinase) (PPPK) (7,8-dihydro-6-hydroxymethylpterin-pyrophosphokinase) (HPPK)	CA2	carbonic anhydrase 2
4MZ9	7MNC	0.275375	0.104	0.186	ssb	Single-stranded DNA-binding protein (SSB) (Helix-destabilizing protein)	PTPN1	protein tyrosine phosphatase non-receptor type 1
3HVS	7QGX	0.26466	0.146	0.261	tpx	Thiol peroxidase (Tpx) (EC 1.11.1.24) (Peroxiredoxin tpx) (Prx) (Scavengase p20) (Thioredoxin peroxidase) (Thioredoxin-dependent peroxiredoxin)	CA2	carbonic anhydrase 2
5D8G	5E0T	0.255915	0.12	0.229	tnaA	Tryptophanase (EC 4.1.99.1) (L-tryptophan indole-lyase) (TNase)	PCNA	proliferating cell nuclear antigen
2EA1	3SSG	0.28459	0.126	0.183	rna	Ribonuclease I (RNase I) (EC 4.6.1.21) (Enterobacter ribonuclease)	TTR	transthyretin
3N1S	5KV4	0.290205	0.103	0.224	hinT	Purine nucleoside phosphoramidase (EC 3.9.1.-) (Histidine triad nucleotide binding protein HinT) (HIT protein)	PPIA	peptidylprolyl isomerase A
2QTA	2UX0	0.207095	0.064	0.097	aceE	Pyruvate dehydrogenase E1 component (PDH E1 component) (EC 1.2.4.1)	CAMK2G	calcium/calmodulin dependent protein kinase II gamma
1XG4	3SQE	0.28875	0.132	0.275	prpB	2-methylisocitrate lyase (2-MIC) (MICL) (EC 4.1.3.30) ((2R,3S)-2-methylisocitrate lyase)	F2	coagulation factor II, thrombin
3W9Z	3WAR	0.219865	0.178	0.311	dusC	tRNA-dihydrouridine(16) synthase (EC 1.3.1.-) (U16-specific dihydrouridine synthase) (U16-specific Dus) (tRNA-dihydrouridine synthase C)	CSNK2A1	casein kinase 2 alpha 1
7X9K	4GIX	0.26621	0.149	0.26	mutT	8-oxo-dGTP diphosphatase (8-oxo-dGTPase) (EC 3.6.1.55) (7,8-dihydro-8-oxoguanine-triphosphatase) (Mutator protein MutT) (dGTP pyrophosphohydrolase)	GLTP	glycolipid transfer protein
2AWO	1DHF	0.27206	0.123	0.241	malK	Maltose/maltodextrin import ATP-binding protein MalK (EC 7.5.2.1)	DHFR	dihydrofolate reductase
1V2G	5V35	0.24511	0.14	0.312	tesA	Thioesterase 1/protease 1/lysophospholipase L1 (TAP) (Acyl-CoA thioesterase 1) (TESA) (EC 3.1.2.2) (Acyl-CoA thioesterase I) (Arylesterase) (EC 3.1.1.2) (Lysophospholipase L1) (EC 3.1.1.5) (Oleoyl-[acyl-carrier-protein] hydrolase) (EC 3.1.2.14) (Phospholipid degradation C) (Pldc) (Protease 1) (EC 3.4.21.-) (Protease I) (Thioesterase I/protease I) (TEP-I)	AIPL1	aryl hydrocarbon receptor interacting protein like 1
1ARH	5SI6	0.241595	0.151	0.296	aspC	Aspartate aminotransferase (AspAT) (EC 2.6.1.1) (Transaminase A)	PDE10A	phosphodiesterase 10A
2FUA	7SE6	0.218405	0.164	0.293	fucA	L-fuculose phosphate aldolase (EC 4.1.2.17) (D-ribulose-phosphate aldolase) (L-fuculose-1-phosphate aldolase)	FBL	fibrillarin
6ST1	3Q4S	0.29923	0.158	0.32	tauA	Taurine-binding periplasmic protein (Sulfate starvation-induced protein 1) (SSI1)	GYG1	glycogenin 1
7WW5	8DYC	0.21991	0.092	0.155	mutT	8-oxo-dGTP diphosphatase (8-oxo-dGTPase) (EC 3.6.1.55) (7,8-dihydro-8-oxoguanine-triphosphatase) (Mutator protein MutT) (dGTP pyrophosphohydrolase)	CYP3A4	cytochrome P450 family 3 subfamily A member 4
1FUQ	7KQ8	0.23771	0.15	0.267	fumC	Fumarate hydratase class II (Fumarase C) (EC 4.2.1.2) (Aerobic fumarase) (Iron-independent fumarase)	MEMO1	mediator of cell motility 1
1QZM	5ZAJ	0.22657	0.11	0.187	lon	Lon protease (EC 3.4.21.53) (ATP-dependent protease La)	PLAU	plasminogen activator, urokinase
3RVJ	1FH2	0.27597	0.145	0.328	cheY	Chemotaxis protein CheY	TTR	transthyretin
5QOA	6YJM	0.294385	0.161	0.318	dsbA	Thiol:disulfide interchange protein DsbA	ADAMTS5	ADAM metallopeptidase with thrombospondin type 1 motif 5
4NIH	2DDK	0.282895	0.183	0.297	alkB	Alpha-ketoglutarate-dependent dioxygenase AlkB (EC 1.14.11.33) (Alkylated DNA repair protein AlkB) (DNA oxidative demethylase AlkB)	IMPA2	inositol monophosphatase 2
6MBN	7KKO	0.247125	0.146	0.308	lptB	Lipopolysaccharide export system ATP-binding protein LptB (EC 7.5.2.-)	TNKS	tankyrase
7WW6	6V1K	0.291475	0.151	0.281	mutT	8-oxo-dGTP diphosphatase (8-oxo-dGTPase) (EC 3.6.1.55) (7,8-dihydro-8-oxoguanine-triphosphatase) (Mutator protein MutT) (dGTP pyrophosphohydrolase)	BRD4	bromodomain containing 4
8E9O	6A0I	0.297635	0.144	0.256	aspC	Aspartate aminotransferase (AspAT) (EC 2.6.1.1) (Transaminase A)	NTAN1	N-terminal asparagine amidase
6TZK	3FXJ	0.26381	0.13	0.292	bcsC	Cellulose synthase operon protein C	PPM1A	protein phosphatase, Mg2+/Mn2+ dependent 1A
4G0L	5FAE	0.293555	0.106	0.152	yqjG	Glutathionyl-hydroquinone reductase YqjG (GS-HQR) (EC 1.8.5.7)	GSN	gelsolin
1ECL	2XU5	0.21353	0.099	0.165	topA	DNA topoisomerase 1 (EC 5.6.2.1) (DNA topoisomerase I) (Omega-protein) (Relaxing enzyme) (Swivelase) (Untwisting enzyme)	CTSL	cathepsin L
1NHH	1MD8	0.23628	0.164	0.295	mutL	DNA mismatch repair protein MutL	C1R	complement C1r
3OD3	7S8Y	0.23411	0.118	0.209	cueO	Multicopper oxidase CueO (MCO) (EC 1.16.3.4) (Blue copper oxidase CueO) (Copper efflux oxidase) (Cu efflux oxidase) (Cuprous oxidase)	HSP90AA1	heat shock protein 90 alpha family class A member 1
4ENP	6TR9	0.248455	0.102	0.132	katE	Catalase HPII (EC 1.11.1.6) (Hydroxyperoxidase II)	FTL	ferritin light chain
2GG8	4UW4	0.29295	0.143	0.234	map	Methionine aminopeptidase (MAP) (MetAP) (EC 3.4.11.18) (Peptidase M)	LGALS7	galectin 7
5VTG	8DYF	0.271525	0.143	0.272	tamB	Translocation and assembly module subunit TamB (Autotransporter assembly factor TamB)	IL17A	interleukin 17A
1GOC	1DVX	0.29711	0.146	0.28	rnhA	Ribonuclease HI (RNase HI) (EC 3.1.26.4) (Ribonuclease H) (RNase H)	TTR	transthyretin
1S16	2HWQ	0.243425	0.16	0.3	parE	DNA topoisomerase 4 subunit B (EC 5.6.2.2) (Topoisomerase IV subunit B)	PPARG	peroxisome proliferator activated receptor gamma
5Z4O	4I1R	0.241675	0.172	0.288	gyrB	DNA gyrase subunit B (EC 5.6.2.2) (Type IIA topoisomerase subunit GyrB)	MALT1	MALT1 paracaspase
1GG1	3CEQ	0.23553	0.16	0.283	aroG	Phospho-2-dehydro-3-deoxyheptonate aldolase, Phe-sensitive (EC 2.5.1.54) (3-deoxy-D-arabino-heptulosonate 7-phosphate synthase) (DAHP synthase) (Phospho-2-keto-3-deoxyheptonate aldolase)	KLC2	kinesin light chain 2
5QME	4IMN	0.286925	0.137	0.321	dsbA	Thiol:disulfide interchange protein DsbA	PTGDS	prostaglandin D2 synthase
1UIV	5SED	0.217785	0.129	0.275	nikA	Nickel-binding periplasmic protein	PDE10A	phosphodiesterase 10A
2IPM	4CSY	0.230805	0.136	0.262	mglB	D-galactose/methyl-galactoside binding periplasmic protein MglB (D-galactose-binding periplasmic protein) (GBP) (D-galactose/D-glucose-binding protein) (GGBP)	SELE	selectin E
1OG6	3MB3	0.23651	0.12	0.187	ydhF	Oxidoreductase YdhF (EC 1.-.-.-)	PHIP	pleckstrin homology domain interacting protein
1KTN	5MQ1	0.25992	0.111	0.222	deoC	Deoxyribose-phosphate aldolase (DERA) (EC 4.1.2.4) (2-deoxy-D-ribose 5-phosphate aldolase) (Phosphodeoxyriboaldolase) (Deoxyriboaldolase)	BRD7	bromodomain containing 7
1HW7	1B55	0.24868	0.122	0.252	hslO	33 kDa chaperonin (Heat shock protein 33) (HSP33)	BTK	Bruton tyrosine kinase
1NLM	5WLV	0.26452	0.16	0.256	murG	UDP-N-acetylglucosamine--N-acetylmuramyl-(pentapeptide) pyrophosphoryl-undecaprenol N-acetylglucosamine transferase (EC 2.4.1.227) (Undecaprenyl-PP-MurNAc-pentapeptide-UDPGlcNAc GlcNAc transferase)	CA2	carbonic anhydrase 2
3B8J	3MTS	0.26841	0.07	0.13	degS	Serine endoprotease DegS (EC 3.4.21.107) (Site-1 protease DegS) (S1P protease DegS) (Site-1-type intramembrane protease)	SUV39H1	SUV39H1 histone lysine methyltransferase
5A61	4LB4	0.26527	0.18	0.307	ygiF	Inorganic triphosphatase (PPPase) (EC 3.6.1.25) (ORFXE)	AKR1B1	aldo-keto reductase family 1 member B
2Q28	6RCI	0.24231	0.082	0.158	oxc	Oxalyl-CoA decarboxylase (EC 4.1.1.8)	REXO2	RNA exonuclease 2
6N96	2PA1	0.22383	0.096	0.188	scpB	Methylmalonyl-CoA decarboxylase (MMCD) (EC 4.1.1.-) (Transcarboxylase)	PDLIM2	PDZ and LIM domain 2
4HZ0	4H5R	0.23212	0.136	0.256	parE	DNA topoisomerase 4 subunit B (EC 5.6.2.2) (Topoisomerase IV subunit B)	HSPA8	heat shock protein family A (Hsp70) member 8
2EFF	3OP5	0.28188	0.112	0.19	cyaY	Iron-sulfur cluster assembly protein CyaY (Bacterial frataxin ortholog)	VRK1	VRK serine/threonine kinase 1
1CG4	3APM	0.253705	0.171	0.299	purA	Adenylosuccinate synthetase (AMPSase) (AdSS) (EC 6.3.4.4) (IMP--aspartate ligase)	PADI4	peptidyl arginine deiminase 4
5E8Q	6TX5	0.24799	0.131	0.269	folA	Dihydrofolate reductase (EC 1.5.1.3)	FKBP5	FKBP prolyl isomerase 5
1AJA	7JNX	0.268825	0.14	0.234	phoA	Alkaline phosphatase (APase) (EC 3.1.3.1)	CA2	carbonic anhydrase 2
3BLS	6N83	0.21417	0.138	0.294	ampC	Beta-lactamase (EC 3.5.2.6) (Cephalosporinase)	FDPS	farnesyl diphosphate synthase
3B6I	6AZV	0.266465	0.135	0.221	wrbA	NAD(P)H dehydrogenase (quinone) (EC 1.6.5.2) (Flavoprotein WrbA) (NAD(P)H:quinone oxidoreductase) (NQO)	IDO1	indoleamine 2,3-dioxygenase 1
1NN4	6W7J	0.255985	0.105	0.183	rpiB	Ribose-5-phosphate isomerase B (EC 5.3.1.6) (Phosphoriboisomerase B)	TDP1	tyrosyl-DNA phosphodiesterase 1
1R62	5DJP	0.2771	0.119	0.227	glnL	Sensory histidine kinase/phosphatase NtrB (EC 2.7.13.3) (EC 3.1.3.-) (Nitrogen regulation protein NR(II)) (Nitrogen regulator II) (NRII)	FDPS	farnesyl diphosphate synthase
1OPC	2HBT	0.287075	0.16	0.236	ompR	DNA-binding dual transcriptional regulator OmpR (Transcriptional regulatory protein OmpR)	EGLN1	egl-9 family hypoxia inducible factor 1
2FQE	3SZA	0.27381	0.145	0.301	cueO	Multicopper oxidase CueO (MCO) (EC 1.16.3.4) (Blue copper oxidase CueO) (Copper efflux oxidase) (Cu efflux oxidase) (Cuprous oxidase)	ALDH3A1	aldehyde dehydrogenase 3 family member A1
2X5K	7AVZ	0.23056	0.156	0.282	epd	D-erythrose-4-phosphate dehydrogenase (E4PDH) (EC 1.2.1.72)	MERTK	MER proto-oncogene, tyrosine kinase
6YED	7M80	0.240985	0.131	0.326	potF	Putrescine-binding periplasmic protein PotF	POLH	DNA polymerase eta
2FDF	4QNA	0.2277	0.168	0.269	alkB	Alpha-ketoglutarate-dependent dioxygenase AlkB (EC 1.14.11.33) (Alkylated DNA repair protein AlkB) (DNA oxidative demethylase AlkB)	STK24	serine/threonine kinase 24
1KSP	2CCT	0.21699	0.113	0.183	polA	DNA polymerase I (POL I) (EC 2.7.7.7)	HSP90AA1	heat shock protein 90 alpha family class A member 1
6NZA	5M4H	0.234185	0.123	0.229	fumC	Fumarate hydratase class II (Fumarase C) (EC 4.2.1.2) (Aerobic fumarase) (Iron-independent fumarase)	HSP90AA1	heat shock protein 90 alpha family class A member 1
5WLY	3ENB	0.30947	0.175	0.315	lpxH	UDP-2,3-diacylglucosamine hydrolase (EC 3.6.1.54) (UDP-2,3-diacylglucosamine diphosphatase) (UDP-2,3-diacylglucosamine pyrophosphatase)	PRPF8	pre-mRNA processing factor 8
1ONR	4RC3	0.30927	0.154	0.293	talB	Transaldolase B (EC 2.2.1.2)	PIM1	Pim-1 proto-oncogene, serine/threonine kinase
4N94	5SEP	0.306545	0.145	0.303	dnaN	Beta sliding clamp (Beta clamp) (Sliding clamp) (Beta-clamp processivity factor) (DNA polymerase III beta sliding clamp subunit)	PDE10A	phosphodiesterase 10A
6SGN	6UKW	0.315715	0.125	0.212	rutA	Pyrimidine monooxygenase RutA (EC 1.14.99.46)	STING1	stimulator of interferon response cGAMP interactor 1
7DQW	7F99	0.32357	0.111	0.196	gyrB	DNA gyrase subunit B (EC 5.6.2.2) (Type IIA topoisomerase subunit GyrB)	EPRS1	glutamyl-prolyl-tRNA synthetase 1
1XDY	2NQ7	0.30771	0.137	0.292	msrP	Protein-methionine-sulfoxide reductase catalytic subunit MsrP (EC 1.8.5.-)	METAP1	methionyl aminopeptidase 1
5FX3	5H0Z	0.396515	0.164	0.245	fimH	Type 1 fimbrin D-mannose specific adhesin (Protein FimH)	TTR	transthyretin
6SGG	7RM9	0.31171	0.151	0.279	rutA	Pyrimidine monooxygenase RutA (EC 1.14.99.46)	MDH1	malate dehydrogenase 1
4NIG	5PRS	0.306975	0.137	0.235	alkB	Alpha-ketoglutarate-dependent dioxygenase AlkB (EC 1.14.11.33) (Alkylated DNA repair protein AlkB) (DNA oxidative demethylase AlkB)	BRD1	bromodomain containing 1
1I2L	4BC5	0.308775	0.144	0.243	pabC	Aminodeoxychorismate lyase (EC 4.1.3.38) (4-amino-4-deoxychorismate lyase) (ADC lyase) (ADCL)	XYLB	xylulokinase
1RMY	1D1S	0.372225	0.134	0.246	aphA	Class B acid phosphatase (CBAP) (EC 3.1.3.2)	ADH7	alcohol dehydrogenase 7 (class IV), mu or sigma polypeptide
4Q45	5KM5	0.305815	0.105	0.148	dinB	DNA polymerase IV (Pol IV) (EC 2.7.7.7) (Translesion synthesis polymerase IV) (TSL polymerase IV)	HINT2	histidine triad nucleotide binding protein 2
5E1L	3EDG	0.32151	0.152	0.279	zapC	Cell division protein ZapC (FtsZ-associated protein C) (Z-ring-associated protein C)	BMP1	bone morphogenetic protein 1
6NZB	5PCI	0.31965	0.093	0.145	fumC	Fumarate hydratase class II (Fumarase C) (EC 4.2.1.2) (Aerobic fumarase) (Iron-independent fumarase)	BAZ2B	bromodomain adjacent to zinc finger domain 2B
3IAP	3BK0	0.376905	0.076	0.134	lacZ	Beta-galactosidase (Beta-gal) (EC 3.2.1.23) (Lactase)	UMPS	uridine monophosphate synthetase
1ZIU	6ZVL	0.306585	0.146	0.286	malE	Maltose/maltodextrin-binding periplasmic protein (MMBP) (Maltodextrin-binding protein) (Maltose-binding protein) (MBP)	NOTUM	notum, palmitoleoyl-protein carboxylesterase
5QLY	7XI7	0.301205	0.169	0.313	dsbA	Thiol:disulfide interchange protein DsbA	DHFR	dihydrofolate reductase
1GER	2BTZ	0.3039	0.15	0.299	gor	Glutathione reductase (GR) (GRase) (EC 1.8.1.7)	PDK2	pyruvate dehydrogenase kinase 2
7B6Q	1MD4	0.31946	0.135	0.223	murE	UDP-N-acetylmuramoyl-L-alanyl-D-glutamate--2,6-diaminopimelate ligase (EC 6.3.2.13) (Meso-A2pm-adding enzyme) (Meso-diaminopimelate-adding enzyme) (UDP-MurNAc-L-Ala-D-Glu:meso-diaminopimelate ligase) (UDP-MurNAc-tripeptide synthetase) (UDP-N-acetylmuramyl-tripeptide synthetase)	GSTP1	glutathione S-transferase pi 1
5QLM	5I8A	0.314285	0.164	0.302	dsbA	Thiol:disulfide interchange protein DsbA	NTRK1	neurotrophic receptor tyrosine kinase 1
1B5T	1V4S	0.33733	0.138	0.276	metF	5,10-methylenetetrahydrofolate reductase (MTHFR) (EC 1.5.1.54) (NADH-dependent 5,10-methylenetetrahydrofolate reductase)	GCK	glucokinase
1BL0	4YQV	0.314515	0.147	0.235	marA	Multiple antibiotic resistance protein MarA	GSTO1	glutathione S-transferase omega 1
1GES	4LQY	0.32426	0.157	0.304	gor	Glutathione reductase (GR) (GRase) (EC 1.8.1.7)	ENPP4	ectonucleotide pyrophosphatase/phosphodiesterase 4
1T1R	4KBA	0.30803	0.142	0.27	dxr	1-deoxy-D-xylulose 5-phosphate reductoisomerase (DXP reductoisomerase) (EC 1.1.1.267) (1-deoxyxylulose-5-phosphate reductoisomerase) (2-C-methyl-D-erythritol 4-phosphate synthase)	CSNK1D	casein kinase 1 delta
1TXX	6WO7	0.310045	0.141	0.319	trxA	Thioredoxin 1 (Trx-1)	NUDT3	nudix hydrolase 3
5GW7	6D3F	0.32245	0.104	0.182	ygjK	Glucosidase YgjK (EC 3.2.1.-)	PTPRE	protein tyrosine phosphatase receptor type E
3DYR	5PV0	0.32332	0.178	0.31	trxA	Thioredoxin 1 (Trx-1)	BRD1	bromodomain containing 1
5XU7	2QCF	0.31755	0.151	0.236	acpS	Holo-[acyl-carrier-protein] synthase (Holo-ACP synthase) (EC 2.7.8.7) (4'-phosphopantetheinyl transferase AcpS)	UMPS	uridine monophosphate synthetase
7JY8	7ZZO	0.326765	0.155	0.283	recA	Protein RecA (Recombinase A)	HDAC2	histone deacetylase 2
4ENQ	7FF6	0.33887	0.069	0.103	katE	Catalase HPII (EC 1.11.1.6) (Hydroxyperoxidase II)	FABP3	fatty acid binding protein 3
4EAY	5JCW	0.30647	0.154	0.239	uxuA	Mannonate dehydratase (EC 4.2.1.8) (D-mannonate hydro-lyase)	GSTP1	glutathione S-transferase pi 1
8E9C	7NZN	0.308015	0.173	0.306	aspC	Aspartate aminotransferase (AspAT) (EC 2.6.1.1) (Transaminase A)	RET	ret proto-oncogene
1CW7	3Q2G	0.33998	0.14	0.257	icd	Isocitrate dehydrogenase [NADP] (IDH) (EC 1.1.1.42) (IDP) (NADP(+)-specific ICDH) (Oxalosuccinate decarboxylase)	ADAMTS1	ADAM metallopeptidase with thrombospondin type 1 motif 1
3O1V	6B42	0.352075	0.143	0.241	alkB	Alpha-ketoglutarate-dependent dioxygenase AlkB (EC 1.14.11.33) (Alkylated DNA repair protein AlkB) (DNA oxidative demethylase AlkB)	HINT1	histidine triad nucleotide binding protein 1
2IO7	5XUI	0.31493	0.122	0.236	gss	Bifunctional glutathionylspermidine synthetase/amidase (GspSA) [Includes: Glutathionylspermidine amidase (Gsp amidase) (EC 3.5.1.78) (Glutathionylspermidine amidohydrolase [spermidine-forming]); Glutathionylspermidine synthetase (Gsp synthetase) (EC 6.3.1.8) (Glutathione:spermidine ligase [ADP-forming]) (Gsp synthase)]	PDE10A	phosphodiesterase 10A
1JRL	4D6A	0.35578	0.126	0.286	tesA	Thioesterase 1/protease 1/lysophospholipase L1 (TAP) (Acyl-CoA thioesterase 1) (TESA) (EC 3.1.2.2) (Acyl-CoA thioesterase I) (Arylesterase) (EC 3.1.1.2) (Lysophospholipase L1) (EC 3.1.1.5) (Oleoyl-[acyl-carrier-protein] hydrolase) (EC 3.1.2.14) (Phospholipid degradation C) (Pldc) (Protease 1) (EC 3.4.21.-) (Protease I) (Thioesterase I/protease I) (TEP-I)	PMP2	peripheral myelin protein 2
7JZG	3LO5	0.35051	0.15	0.231	dapA	4-hydroxy-tetrahydrodipicolinate synthase (HTPA synthase) (EC 4.3.3.7)	HRAS	HRas proto-oncogene, GTPase
1GER	3ZNO	0.370755	0.158	0.327	gor	Glutathione reductase (GR) (GRase) (EC 1.8.1.7)	DAO	D-amino acid oxidase
4E3M	5DBA	0.303025	0.167	0.304	ampC	Beta-lactamase (EC 3.5.2.6) (Cephalosporinase)	POLB	DNA polymerase beta
1RX2	2Q2Y	0.323965	0.13	0.211	folA	Dihydrofolate reductase (EC 1.5.1.3)	KIF11	kinesin family member 11
4ER8	7O0B	0.369495	0.132	0.251	rayT	REP-associated tyrosine transposase	TRIM3	tripartite motif containing 3
6HL8	5NU2	0.30334	0.14	0.236	glaH	Glutarate 2-hydroxylase (G-2-H) (EC 1.14.11.64) (Carbon starvation induced protein D)	RBP4	retinol binding protein 4
1RX4	2RIX	0.32188	0.125	0.233	folA	Dihydrofolate reductase (EC 1.5.1.3)	ABO	ABO, alpha 1-3-N-acetylgalactosaminyltransferase and alpha 1-3-galactosyltransferase
6AN4	4TLU	0.339305	0.132	0.303	folK	2-amino-4-hydroxy-6-hydroxymethyldihydropteridine pyrophosphokinase (EC 2.7.6.3) (6-hydroxymethyl-7,8-dihydropterin pyrophosphokinase) (PPPK) (7,8-dihydro-6-hydroxymethylpterin-pyrophosphokinase) (HPPK)	TTR	transthyretin
3VOD	5C85	0.3691	0.173	0.266	marR	Multiple antibiotic resistance protein MarR	BRPF1	bromodomain and PHD finger containing 1
2B1L	4HAS	0.31418	0.157	0.299	dsbE	Thiol:disulfide interchange protein DsbE (Cytochrome c biogenesis protein CcmG)	SNX27	sorting nexin 27
1I52	4LZR	0.30842	0.128	0.261	ispD	2-C-methyl-D-erythritol 4-phosphate cytidylyltransferase (EC 2.7.7.60) (4-diphosphocytidyl-2C-methyl-D-erythritol synthase) (CDP-ME synthase) (MEP cytidylyltransferase) (MCT)	BRD4	bromodomain containing 4
2V9F	6UVC	0.304755	0.127	0.199	rhaD	Rhamnulose-1-phosphate aldolase (EC 4.1.2.19)	BCL2L1	BCL2 like 1
6R1O	7VWH	0.30097	0.146	0.256	serS	Serine--tRNA ligase (EC 6.1.1.11) (Seryl-tRNA synthetase) (SerRS) (Seryl-tRNA(Ser/Sec) synthetase)	PPARD	peroxisome proliferator activated receptor delta
6UOD	1LAR	0.30165	0.148	0.237	ansB	L-asparaginase 2 (EC 3.5.1.1) (L-asparaginase II) (L-ASNase II) (L-asparagine amidohydrolase II) (Colaspase)	PTPRF	protein tyrosine phosphatase receptor type F
2JG0	5AV3	0.303035	0.139	0.251	treA	Periplasmic trehalase (EC 3.2.1.28) (Alpha,alpha-trehalase) (Alpha,alpha-trehalose glucohydrolase) (Tre37A)	DAPK1	death associated protein kinase 1
3QPG	5PVJ	0.31517	0.121	0.179	aspC	Aspartate aminotransferase (AspAT) (EC 2.6.1.1) (Transaminase A)	BRD1	bromodomain containing 1
1XS1	1WM2	0.307315	0.093	0.175	dcd	dCTP deaminase (EC 3.5.4.13) (Deoxycytidine triphosphate deaminase)	SUMO2	small ubiquitin like modifier 2
4NJP	5EWC	0.360695	0.12	0.23	glpG	Rhomboid protease GlpG (EC 3.4.21.105) (Intramembrane serine protease)	BRPF1	bromodomain and PHD finger containing 1
1I2R	5ZTO	0.320485	0.157	0.293	talB	Transaldolase B (EC 2.2.1.2)	EGFR	epidermal growth factor receptor
3T0B	4C6F	0.34739	0.1	0.162	lacZ	Beta-galactosidase (Beta-gal) (EC 3.2.1.23) (Lactase)	CAD	carbamoyl-phosphate synthetase 2, aspartate transcarbamylase, and dihydroorotase
6PDH	6KM6	0.304815	0.17	0.303	dsbA	Thiol:disulfide interchange protein DsbA	CA2	carbonic anhydrase 2
6BPM	2GNQ	0.314725	0.136	0.208	fiu	Catecholate siderophore receptor Fiu (Ferric iron uptake protein) (TonB-dependent receptor Fiu)	WDR5	WD repeat domain 5
4JQC	1NWR	0.39242	0.162	0.258	fabI	Enoyl-[acyl-carrier-protein] reductase [NADH] FabI (ENR) (EC 1.3.1.9) (NADH-dependent enoyl-ACP reductase)	CHI3L1	chitinase 3 like 1
5ETL	3EQ5	0.316875	0.141	0.25	folK	2-amino-4-hydroxy-6-hydroxymethyldihydropteridine pyrophosphokinase (EC 2.7.6.3) (6-hydroxymethyl-7,8-dihydropterin pyrophosphokinase) (PPPK) (7,8-dihydro-6-hydroxymethylpterin-pyrophosphokinase) (HPPK)	SKIL	SKI like proto-oncogene
1AAM	5CYS	0.31441	0.134	0.217	aspC	Aspartate aminotransferase (AspAT) (EC 2.6.1.1) (Transaminase A)	TDG	thymine DNA glycosylase
4UOY	4JQ1	0.3119	0.158	0.281	patA	Putrescine aminotransferase (PAT) (PATase) (EC 2.6.1.82) (Cadaverine transaminase) (Diamine transaminase) (EC 2.6.1.29) (Putrescine transaminase) (Putrescine--2-oxoglutaric acid transaminase) (Putrescine:2-OG aminotransferase)	AKR1C2	aldo-keto reductase family 1 member C2
2MBR	1OUC	0.30275	0.114	0.173	murB	UDP-N-acetylenolpyruvoylglucosamine reductase (EC 1.3.1.98) (UDP-N-acetylmuramate dehydrogenase)	LYZ	lysozyme
4CND	3GS0	0.309275	0.159	0.253	trmJ	tRNA (cytidine/uridine-2'-O-)-methyltransferase TrmJ (EC 2.1.1.200) (TrMet(Xm32)) (tRNA (cytidine(32)/uridine(32)-2'-O)-methyltransferase) (tRNA Cm32/Um32 methyltransferase)	TTR	transthyretin
2G2P	3L5P	0.33964	0.103	0.302	hiuH	5-hydroxyisourate hydrolase (HIU hydrolase) (HIUHase) (EC 3.5.2.17) (Transthyretin-like protein) (TLP) (Transthyretin-related protein) (TRP)	MIF	macrophage migration inhibitory factor
1CQ7	1YB1	0.38894	0.159	0.282	aspC	Aspartate aminotransferase (AspAT) (EC 2.6.1.1) (Transaminase A)	HSD17B11	hydroxysteroid 17-beta dehydrogenase 11
1Q6Q	5Q7A	0.33794	0.132	0.246	ulaD	3-keto-L-gulonate-6-phosphate decarboxylase UlaD (EC 4.1.1.85) (3-dehydro-L-gulonate-6-phosphate decarboxylase) (KGPDC) (L-ascorbate utilization protein D)	DCLRE1A	DNA cross-link repair 1A
1QU7	5PQY	0.310355	0.14	0.237	tsr	Methyl-accepting chemotaxis protein I (MCP-I) (Serine chemoreceptor protein)	BRD1	bromodomain containing 1
5QL8	2J8T	0.306455	0.15	0.248	dsbA	Thiol:disulfide interchange protein DsbA	AKR1B1	aldo-keto reductase family 1 member B
2IO8	4BKN	0.3077	0.155	0.298	gss	Bifunctional glutathionylspermidine synthetase/amidase (GspSA) [Includes: Glutathionylspermidine amidase (Gsp amidase) (EC 3.5.1.78) (Glutathionylspermidine amidohydrolase [spermidine-forming]); Glutathionylspermidine synthetase (Gsp synthetase) (EC 6.3.1.8) (Glutathione:spermidine ligase [ADP-forming]) (Gsp synthase)]	DPYSL3	dihydropyrimidinase like 3
4XKT	4NS5	0.327685	0.144	0.324	bfr	Bacterioferritin (BFR) (EC 1.16.3.1) (Cytochrome b-1) (Cytochrome b-557)	ZMYND11	zinc finger MYND-type containing 11
1XDP	5NZX	0.311265	0.129	0.239	ppk	Polyphosphate kinase (EC 2.7.4.1) (ATP-polyphosphate phosphotransferase) (Polyphosphoric acid kinase)	DCLRE1A	DNA cross-link repair 1A
2JFH	1TEV	0.34997	0.135	0.211	murD	UDP-N-acetylmuramoylalanine--D-glutamate ligase (EC 6.3.2.9) (D-glutamic acid-adding enzyme) (UDP-N-acetylmuramoyl-L-alanyl-D-glutamate synthetase)	CMPK1	cytidine/uridine monophosphate kinase 1
4I0A	5PQR	0.31512	0.124	0.269	crp	cAMP-activated global transcriptional regulator CRP (Catabolite activator protein) (CAP) (Catabolite gene activator) (cAMP receptor protein) (CRP) (cAMP regulatory protein)	BRD1	bromodomain containing 1
1S0A	2O05	0.39598	0.116	0.277	bioA	Adenosylmethionine-8-amino-7-oxononanoate aminotransferase (EC 2.6.1.62) (7,8-diamino-pelargonic acid aminotransferase) (DAPA AT) (DAPA aminotransferase) (7,8-diaminononanoate synthase) (DANS) (Diaminopelargonic acid synthase)	SRM	spermidine synthase
1R67	6HFO	0.300955	0.144	0.319	idi	Isopentenyl-diphosphate Delta-isomerase (IPP isomerase) (EC 5.3.3.2) (IPP:DMAPP isomerase) (Isopentenyl pyrophosphate isomerase)	TTC4	tetratricopeptide repeat domain 4
5E3O	6IM6	0.30944	0.086	0.144	fis	DNA-binding protein Fis (Factor-for-inversion stimulation protein) (Hin recombinational enhancer-binding protein)	PDE4D	phosphodiesterase 4D
6ST1	5Q4A	0.329275	0.143	0.298	tauA	Taurine-binding periplasmic protein (Sulfate starvation-induced protein 1) (SSI1)	DCLRE1A	DNA cross-link repair 1A
1OJ7	3FL4	0.329615	0.146	0.322	yqhD	Alcohol dehydrogenase YqhD (EC 1.1.1.2)	MAPK14	mitogen-activated protein kinase 14
5DFM	4D7D	0.31934	0.15	0.309	malE	Maltose/maltodextrin-binding periplasmic protein (MMBP) (Maltodextrin-binding protein) (Maltose-binding protein) (MBP)	CYP3A4	cytochrome P450 family 3 subfamily A member 4
7AYN	1TFH	0.368315	0.181	0.279	fimH	Type 1 fimbrin D-mannose specific adhesin (Protein FimH)	F3	coagulation factor III, tissue factor
6LFC	4ER6	0.344625	0.134	0.241	tesA	Thioesterase 1/protease 1/lysophospholipase L1 (TAP) (Acyl-CoA thioesterase 1) (TESA) (EC 3.1.2.2) (Acyl-CoA thioesterase I) (Arylesterase) (EC 3.1.1.2) (Lysophospholipase L1) (EC 3.1.1.5) (Oleoyl-[acyl-carrier-protein] hydrolase) (EC 3.1.2.14) (Phospholipid degradation C) (Pldc) (Protease 1) (EC 3.4.21.-) (Protease I) (Thioesterase I/protease I) (TEP-I)	DOT1L	DOT1 like histone lysine methyltransferase
1MZO	4IGN	0.31354	0.113	0.199	pflB	Formate acetyltransferase 1 (EC 2.3.1.54) (Pyruvate formate-lyase 1)	ACMSD	aminocarboxymuconate semialdehyde decarboxylase
2D5Y	5KA0	0.311045	0.133	0.271	aspC	Aspartate aminotransferase (AspAT) (EC 2.6.1.1) (Transaminase A)	PTPN1	protein tyrosine phosphatase non-receptor type 1
1DZY	3O5F	0.317165	0.126	0.237	fucA	L-fuculose phosphate aldolase (EC 4.1.2.17) (D-ribulose-phosphate aldolase) (L-fuculose-1-phosphate aldolase)	FKBP5	FKBP prolyl isomerase 5
3K5M	6Y24	0.31843	0.044	0.075	polB	DNA polymerase II (Pol II) (EC 2.7.7.7)	FUBP1	far upstream element binding protein 1
1DJE	5ZOE	0.31436	0.138	0.278	bioF	8-amino-7-oxononanoate synthase (AONS) (EC 2.3.1.47) (7-keto-8-amino-pelargonic acid synthase) (7-KAP synthase) (KAPA synthase) (8-amino-7-ketopelargonate synthase)	FEN1	flap structure-specific endonuclease 1
4BRB	2Q9F	0.31605	0.071	0.141	dgkA	Diacylglycerol kinase (DAGK) (EC 2.7.1.107) (Diglyceride kinase) (DGK)	CYP46A1	cytochrome P450 family 46 subfamily A member 1
1JTS	2UZO	0.31831	0.124	0.258	dps	DNA protection during starvation protein (EC 1.16.-.-)	CDK2	cyclin dependent kinase 2
2PYU	3LUJ	0.397395	0.144	0.268	rdgB	dITP/XTP pyrophosphatase (EC 3.6.1.66) (Deoxyribonucleoside triphosphate pyrophosphohydrolase) (Inosine triphosphate pyrophosphatase) (ITPase) (Non-canonical purine NTP pyrophosphatase) (Non-standard purine NTP pyrophosphatase) (Nucleoside-triphosphate diphosphatase) (Nucleoside-triphosphate pyrophosphatase) (NTPase)	AGO2	argonaute RISC catalytic component 2
4NIH	4A9I	0.304315	0.114	0.238	alkB	Alpha-ketoglutarate-dependent dioxygenase AlkB (EC 1.14.11.33) (Alkylated DNA repair protein AlkB) (DNA oxidative demethylase AlkB)	BRD2	bromodomain containing 2
6VWO	6G0J	0.309785	0.14	0.252	gsk	Guanosine-inosine kinase (EC 2.7.1.73)	PPP1CA	protein phosphatase 1 catalytic subunit alpha
2FUS	5PFI	0.336015	0.092	0.142	fumC	Fumarate hydratase class II (Fumarase C) (EC 4.2.1.2) (Aerobic fumarase) (Iron-independent fumarase)	BAZ2B	bromodomain adjacent to zinc finger domain 2B
4UM4	5PQJ	0.306655	0.159	0.284	ppa	Inorganic pyrophosphatase (EC 3.6.1.1) (Pyrophosphate phospho-hydrolase) (PPase)	BRD1	bromodomain containing 1
2AU6	1R3R	0.31523	0.148	0.246	ppa	Inorganic pyrophosphatase (EC 3.6.1.1) (Pyrophosphate phospho-hydrolase) (PPase)	UROD	uroporphyrinogen decarboxylase
7DKR	2HXP	0.33526	0.134	0.292	grxB	Glutaredoxin 2 (Grx2)	DUSP9	dual specificity phosphatase 9
2EG7	1JMY	0.34315	0.143	0.282	pyrC	Dihydroorotase (DHOase) (EC 3.5.2.3)	CEL	carboxyl ester lipase
1IKA	4DLU	0.30998	0.118	0.176	icd	Isocitrate dehydrogenase [NADP] (IDH) (EC 1.1.1.42) (IDP) (NADP(+)-specific ICDH) (Oxalosuccinate decarboxylase)	HRAS	HRas proto-oncogene, GTPase
3NK5	5ZG1	0.300705	0.135	0.255	aqpZ	Aquaporin Z (Bacterial nodulin-like intrinsic protein) (Water channel AqpZ)	GRIA2	glutamate ionotropic receptor AMPA type subunit 2
4WUC	4O1L	0.320415	0.134	0.296	gyrB	DNA gyrase subunit B (EC 5.6.2.2) (Type IIA topoisomerase subunit GyrB)	ADK	adenosine kinase
1MY8	4X25	0.432965	0.109	0.162	ampC	Beta-lactamase (EC 3.5.2.6) (Cephalosporinase)	PFN1	profilin 1
1NG9	7VCE	0.419075	0.093	0.166	mutS	DNA mismatch repair protein MutS	IMPA1	inositol monophosphatase 1
2AV6	6IPB	0.42839	0.075	0.13	malP	Maltodextrin phosphorylase (EC 2.4.1.1)	UGT2B15	UDP glucuronosyltransferase family 2 member B15
5QO7	1XBS	0.41663	0.164	0.282	dsbA	Thiol:disulfide interchange protein DsbA	TXNL4B	thioredoxin like 4B
1EGH	6NJ7	0.442795	0.138	0.244	mgsA	Methylglyoxal synthase (MGS) (EC 4.2.3.3)	HSD11B1	hydroxysteroid 11-beta dehydrogenase 1
6PA6	7D7U	0.463525	0.104	0.183	ansB	L-asparaginase 2 (EC 3.5.1.1) (L-asparaginase II) (L-ASNase II) (L-asparagine amidohydrolase II) (Colaspase)	AGO2	argonaute RISC catalytic component 2
1MLY	6HRH	0.44223	0.155	0.309	bioA	Adenosylmethionine-8-amino-7-oxononanoate aminotransferase (EC 2.6.1.62) (7,8-diamino-pelargonic acid aminotransferase) (DAPA AT) (DAPA aminotransferase) (7,8-diaminononanoate synthase) (DANS) (Diaminopelargonic acid synthase)	ALAS2	5'-aminolevulinate synthase 2
5GK3	7OGD	0.44259	0.134	0.223	fbaA	Fructose-bisphosphate aldolase class 2 (FBP aldolase) (FBPA) (EC 4.1.2.13) (Fructose-1,6-bisphosphate aldolase) (Fructose-bisphosphate aldolase class II) (Sedoheptulose bisphosphate aldolase)	HRAS	HRas proto-oncogene, GTPase
4HZ0	6GPF	0.44525	0.197	0.321	parE	DNA topoisomerase 4 subunit B (EC 5.6.2.2) (Topoisomerase IV subunit B)	HSP90AA1	heat shock protein 90 alpha family class A member 1
2ZVS	3IWX	0.465165	0.134	0.244	yfhL	Ferredoxin YfhL (EcFd)	ATOX1	antioxidant 1 copper chaperone
2GT2	5W46	0.41177	0.132	0.204	gmm	GDP-mannose mannosyl hydrolase (GDPMH) (EC 3.6.1.-) (Colanic acid biosynthesis protein WcaH)	UBB	ubiquitin B
1IEM	7NE6	0.4664	0.175	0.306	ampC	Beta-lactamase (EC 3.5.2.6) (Cephalosporinase)	TET2	tet methylcytosine dioxygenase 2
1PYQ	1P4M	0.42467	0.168	0.329	panD	Aspartate 1-decarboxylase (EC 4.1.1.11) (Aspartate alpha-decarboxylase) [Cleaved into: Aspartate 1-decarboxylase beta chain; Aspartate 1-decarboxylase alpha chain]	RFK	riboflavin kinase
4F5L	6Q39	0.464485	0.152	0.282	aspC	Aspartate aminotransferase (AspAT) (EC 2.6.1.1) (Transaminase A)	ARG2	arginase 2
5GK7	3BV7	0.45393	0.136	0.295	fbaA	Fructose-bisphosphate aldolase class 2 (FBP aldolase) (FBPA) (EC 4.1.2.13) (Fructose-1,6-bisphosphate aldolase) (Fructose-bisphosphate aldolase class II) (Sedoheptulose bisphosphate aldolase)	AKR1D1	aldo-keto reductase family 1 member D1
2DRI	6FD5	0.456655	0.172	0.275	rbsB	Ribose import binding protein RbsB	APRT	adenine phosphoribosyltransferase
3L1V	6TR5	0.409785	0.136	0.251	gmhB	D-glycero-beta-D-manno-heptose-1,7-bisphosphate 7-phosphatase (EC 3.1.3.82) (D,D-heptose 1,7-bisphosphate phosphatase) (HBP phosphatase)	NOTUM	notum, palmitoleoyl-protein carboxylesterase
1D4Z	2ONY	0.43938	0.136	0.233	cheY	Chemotaxis protein CheY	PNMT	phenylethanolamine N-methyltransferase
4BLW	5OFV	0.48097	0.16	0.294	rlmJ	Ribosomal RNA large subunit methyltransferase J (EC 2.1.1.266) (23S rRNA (adenine(2030)-N6)-methyltransferase) (23S rRNA m6A2030 methyltransferase)	PHGDH	phosphoglycerate dehydrogenase
5HLB	6UJM	0.449245	0.136	0.231	mrcB	Penicillin-binding protein 1B (PBP-1b) (PBP1b) (Murein polymerase) [Includes: Penicillin-insensitive transglycosylase (EC 2.4.1.129) (Peptidoglycan TGase) (Peptidoglycan glycosyltransferase); Penicillin-sensitive transpeptidase (EC 3.4.16.4) (DD-transpeptidase)]	GLS	glutaminase
1GT7	4C45	0.4169	0.091	0.182	rhaD	Rhamnulose-1-phosphate aldolase (EC 4.1.2.19)	PCBD2	pterin-4 alpha-carbinolamine dehydratase 2
4ELX	1N6K	0.430235	0.145	0.245	menB	1,4-dihydroxy-2-naphthoyl-CoA synthase (DHNA-CoA synthase) (EC 4.1.3.36)	RAB5A	RAB5A, member RAS oncogene family
1BRM	5O72	0.42807	0.175	0.287	asd	Aspartate-semialdehyde dehydrogenase (ASA dehydrogenase) (ASADH) (EC 1.2.1.11) (Aspartate-beta-semialdehyde dehydrogenase)	HSD17B14	hydroxysteroid 17-beta dehydrogenase 14
6ENN	6S8X	0.412305	0.162	0.295	trpR	Trp operon repressor	RAB11FIP2	RAB11 family interacting protein 2
3H9C	5THL	0.42176	0.141	0.264	metG	Methionine--tRNA ligase (EC 6.1.1.10) (Methionyl-tRNA synthetase) (MetRS)	YARS1	tyrosyl-tRNA synthetase 1
4JXG	1FIL	0.436665	0.12	0.153	ampC	Beta-lactamase (EC 3.5.2.6) (Cephalosporinase)	PFN1	profilin 1
1S8A	2CLS	0.400625	0.143	0.313	mgsA	Methylglyoxal synthase (MGS) (EC 4.2.3.3)	RND1	Rho family GTPase 1
7VSC	3E9L	0.419795	0.14	0.252	rnhA	Ribonuclease HI (RNase HI) (EC 3.1.26.4) (Ribonuclease H) (RNase H)	PRPF8	pre-mRNA processing factor 8
3QE7	7S3F	0.48126	0.178	0.293	uraA	Uracil permease (Uracil transporter) (Uracil/H(+) symporter UraA)	ODC1	ornithine decarboxylase 1
1AQT	7VP9	0.455715	0.14	0.326	atpC	ATP synthase epsilon chain (ATP synthase F1 sector epsilon subunit) (F-ATPase epsilon subunit)	CLPP	caseinolytic mitochondrial matrix peptidase proteolytic subunit
1FUP	1B68	0.401295	0.094	0.143	fumC	Fumarate hydratase class II (Fumarase C) (EC 4.2.1.2) (Aerobic fumarase) (Iron-independent fumarase)	APOE	apolipoprotein E
1NHH	5OFB	0.49763	0.157	0.259	mutL	DNA mismatch repair protein MutL	MORC2	MORC family CW-type zinc finger 2
6Z1B	5SJ3	0.41881	0.159	0.28	rutR	HTH-type transcriptional regulator RutR (Rut operon repressor)	PDE10A	phosphodiesterase 10A
3TUT	3S5O	0.413955	0.177	0.299	rtcA	RNA 3'-terminal phosphate cyclase (RNA cyclase) (RNA-3'-phosphate cyclase) (EC 6.5.1.4)	HOGA1	4-hydroxy-2-oxoglutarate aldolase 1
1XQF	7S3F	0.413925	0.143	0.283	amtB	Ammonium transporter AmtB (Ammonia channel AmtB) (Ammonium channel AmtB)	ODC1	ornithine decarboxylase 1
1DZY	1EC6	0.408295	0.116	0.193	fucA	L-fuculose phosphate aldolase (EC 4.1.2.17) (D-ribulose-phosphate aldolase) (L-fuculose-1-phosphate aldolase)	NOVA2	NOVA alternative splicing regulator 2
4LSF	7S3F	0.464035	0.183	0.308	ompF	Outer membrane porin F (Outer membrane protein 1A) (Outer membrane protein B) (Outer membrane protein F) (Outer membrane protein IA) (Porin OmpF)	ODC1	ornithine decarboxylase 1
4UHJ	6E08	0.40545	0.103	0.148	cpxR	Transcriptional regulatory protein CpxR	G6PD	glucose-6-phosphate dehydrogenase
1PIL	6XH2	0.481805	0.115	0.292	glnB	Nitrogen regulatory protein P-II 1	SNRPA	small nuclear ribonucleoprotein polypeptide A
1IM6	5J0C	0.40426	0.119	0.226	folK	2-amino-4-hydroxy-6-hydroxymethyldihydropteridine pyrophosphokinase (EC 2.7.6.3) (6-hydroxymethyl-7,8-dihydropterin pyrophosphokinase) (PPPK) (7,8-dihydro-6-hydroxymethylpterin-pyrophosphokinase) (HPPK)	SOD1	superoxide dismutase 1
7OYV	7WH5	0.426595	0.117	0.228	potF	Putrescine-binding periplasmic protein PotF	CLPP	caseinolytic mitochondrial matrix peptidase proteolytic subunit
5EJ6	6SY1	0.46464	0.15	0.273	menD	2-succinyl-5-enolpyruvyl-6-hydroxy-3-cyclohexene-1-carboxylate synthase (SEPHCHC synthase) (EC 2.2.1.9) (Menaquinone biosynthesis protein MenD)	DHTKD1	dehydrogenase E1 and transketolase domain containing 1
1TDR	7NBJ	0.43291	0.125	0.253	folA	Dihydrofolate reductase (EC 1.5.1.3)	NNMT	nicotinamide N-methyltransferase
1DBQ	7RT2	0.40934	0.141	0.271	purR	HTH-type transcriptional repressor PurR (Pur regulon repressor) (Purine nucleotide synthesis repressor)	KRAS	KRAS proto-oncogene, GTPase
1PHQ	4UT2	0.42117	0.15	0.324	kdsA	2-dehydro-3-deoxyphosphooctonate aldolase (EC 2.5.1.55) (3-deoxy-D-manno-octulosonic acid 8-phosphate synthase) (KDO-8-phosphate synthase) (KDO 8-P synthase) (KDOPS) (Phospho-2-dehydro-3-deoxyoctonate aldolase)	PPP1CC	protein phosphatase 1 catalytic subunit gamma
6GTY	4ZMQ	0.423745	0.173	0.297	fimH	Type 1 fimbrin D-mannose specific adhesin (Protein FimH)	CDH3	cadherin 3
6P88	8DYG	0.441575	0.083	0.134	lpxD	UDP-3-O-(3-hydroxymyristoyl)glucosamine N-acyltransferase (UDP-3-O-(3-OHC14)-GlcN N-acyltransferase) (EC 2.3.1.191) (Protein FirA) (Rifampicin resistance protein) (UDP-3-O-(3-hydroxytetradecanoyl)glucosamine N-acyltransferase)	IL17A	interleukin 17A
4UYO	1SX6	0.40497	0.141	0.223	dgkA	Diacylglycerol kinase (DAGK) (EC 2.7.1.107) (Diglyceride kinase) (DGK)	GLTP	glycolipid transfer protein
1KP2	7RUH	0.484885	0.088	0.134	argG	Argininosuccinate synthase (EC 6.3.4.5) (Citrulline--aspartate ligase)	BRD4	bromodomain containing 4
2OI6	6EQJ	0.473375	0.151	0.237	glmU	Bifunctional protein GlmU [Includes: UDP-N-acetylglucosamine pyrophosphorylase (EC 2.7.7.23) (N-acetylglucosamine-1-phosphate uridyltransferase); Glucosamine-1-phosphate N-acetyltransferase (EC 2.3.1.157)]	GYG1	glycogenin 1
1IXN	4J5R	0.4031	0.16	0.238	pdxJ	Pyridoxine 5'-phosphate synthase (PNP synthase) (EC 2.6.99.2)	OARD1	O-acyl-ADP-ribose deacylase 1
2FEO	8D0E	0.43039	0.113	0.257	cmk	Cytidylate kinase (CK) (EC 2.7.4.25) (Cytidine monophosphate kinase) (CMP kinase) (Protein MssA) (p25)	SARM1	sterile alpha and TIR motif containing 1
1I2N	5QIB	0.48215	0.185	0.322	talB	Transaldolase B (EC 2.2.1.2)	HAO1	hydroxyacid oxidase 1
2R8P	7S3F	0.46152	0.149	0.256	tktA	Transketolase 1 (TK 1) (EC 2.2.1.1)	ODC1	ornithine decarboxylase 1
3TTW	6AFH	0.42098	0.091	0.142	katE	Catalase HPII (EC 1.11.1.6) (Hydroxyperoxidase II)	PARK7	Parkinsonism associated deglycase
5QNE	5IJT	0.436475	0.12	0.288	dsbA	Thiol:disulfide interchange protein DsbA	PRDX2	peroxiredoxin 2
1H4C	3V32	0.421635	0.168	0.311	mobA	Molybdenum cofactor guanylyltransferase (MoCo guanylyltransferase) (EC 2.7.7.77) (GTP:molybdopterin guanylyltransferase) (Mo-MPT guanylyltransferase) (Molybdopterin guanylyltransferase) (Molybdopterin-guanine dinucleotide biosynthesis protein A) (Molybdopterin-guanine dinucleotide synthase) (MGD synthase) (Protein FA)	ZC3H12A	zinc finger CCCH-type containing 12A
2V4Y	3A1F	0.41248	0.142	0.275	pyrH	Uridylate kinase (UK) (EC 2.7.4.22) (Uridine monophosphate kinase) (UMP kinase) (UMPK)	CYBB	cytochrome b-245 beta chain
4ENV	4RKW	0.42274	0.087	0.139	katE	Catalase HPII (EC 1.11.1.6) (Hydroxyperoxidase II)	PARK7	Parkinsonism associated deglycase
4HZF	4IRI	0.41147	0.09	0.189	crp	cAMP-activated global transcriptional regulator CRP (Catabolite activator protein) (CAP) (Catabolite gene activator) (cAMP receptor protein) (CRP) (cAMP regulatory protein)	ERG	ETS transcription factor ERG
3L9X	2ATV	0.47674	0.119	0.226	kefC	Glutathione-regulated potassium-efflux system protein KefC (K(+)/H(+) antiporter)	RERG	RAS like estrogen regulated growth inhibitor
1JL2	4JKD	0.439165	0.182	0.276	rnhA	Ribonuclease HI (RNase HI) (EC 3.1.26.4) (Ribonuclease H) (RNase H)	PRPF8	pre-mRNA processing factor 8
1TZP	5KM9	0.40686	0.129	0.191	mepA	Penicillin-insensitive murein endopeptidase (EC 3.4.24.-) (D-alanyl-D-alanine-endopeptidase) (DD-endopeptidase)	HINT2	histidine triad nucleotide binding protein 2
6ASM	7S3F	0.42386	0.182	0.302	pckA	Phosphoenolpyruvate carboxykinase (ATP) (PCK) (PEP carboxykinase) (PEPCK) (EC 4.1.1.49)	ODC1	ornithine decarboxylase 1
1XVU	3HFG	0.4038	0.149	0.255	caiB	L-carnitine CoA-transferase (EC 2.8.3.21) (Crotonobetainyl-CoA:carnitine CoA-transferase)	HSD11B1	hydroxysteroid 11-beta dehydrogenase 1
1DIZ	7YX6	0.411815	0.113	0.194	alkA	DNA-3-methyladenine glycosylase 2 (EC 3.2.2.21) (3-methyladenine-DNA glycosylase II, inducible) (TAG II) (DNA-3-methyladenine glycosidase II) (DNA-3-methyladenine glycosylase II)	YTHDF2	YTH N6-methyladenosine RNA binding protein F2
5D56	3S0I	0.40751	0.149	0.218	dgkA	Diacylglycerol kinase (DAGK) (EC 2.7.1.107) (Diglyceride kinase) (DGK)	GLTP	glycolipid transfer protein
2GG8	7NZN	0.410035	0.133	0.314	map	Methionine aminopeptidase (MAP) (MetAP) (EC 3.4.11.18) (Peptidase M)	RET	ret proto-oncogene
2E9A	3G3M	0.41697	0.142	0.291	ispU	Ditrans,polycis-undecaprenyl-diphosphate synthase ((2E,6E)-farnesyl-diphosphate specific) (EC 2.5.1.31) (Ditrans,polycis-undecaprenylcistransferase) (Undecaprenyl diphosphate synthase) (UDS) (Undecaprenyl pyrophosphate synthase) (UPP synthase)	UMPS	uridine monophosphate synthetase
1TOK	3GGC	0.44289	0.111	0.211	aspC	Aspartate aminotransferase (AspAT) (EC 2.6.1.1) (Transaminase A)	HPRT1	hypoxanthine phosphoribosyltransferase 1
4LQ1	3EWU	0.43833	0.133	0.204	glgB	1,4-alpha-glucan branching enzyme GlgB (EC 2.4.1.18) (1,4-alpha-D-glucan:1,4-alpha-D-glucan 6-glucosyl-transferase) (Alpha-(1->4)-glucan branching enzyme) (Glycogen branching enzyme) (BE)	UMPS	uridine monophosphate synthetase
7O9G	1JTV	0.42951	0.196	0.338	ffh	Signal recognition particle protein (Fifty-four homolog) (Ffh) (p48)	HSD17B1	hydroxysteroid 17-beta dehydrogenase 1
4R0Y	3FGS	0.471225	0.166	0.294	malE	Maltose/maltodextrin-binding periplasmic protein (MMBP) (Maltodextrin-binding protein) (Maltose-binding protein) (MBP)	TF	transferrin
1I29	7EIY	0.420065	0.119	0.29	sufS	Cysteine desulfurase (EC 2.8.1.7) (Cysteine sulfinate desulfinase) (CSD) (EC 3.13.1.-) (Selenocysteine beta-lyase) (SCL) (Selenocysteine lyase) (EC 4.4.1.16) (Selenocysteine reductase)	HDC	histidine decarboxylase
3KUG	4ETG	0.430935	0.15	0.269	folK	2-amino-4-hydroxy-6-hydroxymethyldihydropteridine pyrophosphokinase (EC 2.7.6.3) (6-hydroxymethyl-7,8-dihydropterin pyrophosphokinase) (PPPK) (7,8-dihydro-6-hydroxymethylpterin-pyrophosphokinase) (HPPK)	MIF	macrophage migration inhibitory factor
5DMM	3WF2	0.45519	0.12	0.203	mmuM	Homocysteine S-methyltransferase (EC 2.1.1.10) (S-methylmethionine:homocysteine methyltransferase)	GLB1	galactosidase beta 1
3TCH	3R7X	0.40082	0.137	0.226	oppA	Periplasmic oligopeptide-binding protein	GRIA2	glutamate ionotropic receptor AMPA type subunit 2
1KJ8	5SY9	0.412915	0.162	0.254	purT	Formate-dependent phosphoribosylglycinamide formyltransferase (EC 6.3.1.21) (5'-phosphoribosylglycinamide transformylase 2) (Formate-dependent GAR transformylase) (GAR transformylase 2) (GART 2) (GAR transformylase T) (Non-folate glycinamide ribonucleotide transformylase) (Phosphoribosylglycinamide formyltransferase 2)	PARK7	Parkinsonism associated deglycase
1VB3	1FVO	0.415045	0.153	0.292	thrC	Threonine synthase (TS) (EC 4.2.3.1)	OTC	ornithine transcarbamylase
4X50	6UYC	0.44892	0.16	0.292	fimH	Type 1 fimbrin D-mannose specific adhesin (Protein FimH)	TEAD2	TEA domain transcription factor 2
1FHU	4C6K	0.409835	0.146	0.261	menC	o-succinylbenzoate synthase (OSB synthase) (OSBS) (EC 4.2.1.113) (4-(2'-carboxyphenyl)-4-oxybutyric acid synthase) (o-succinylbenzoic acid synthase)	CAD	carbamoyl-phosphate synthetase 2, aspartate transcarbamylase, and dihydroorotase
8E9N	5WY0	0.405395	0.131	0.225	aspC	Aspartate aminotransferase (AspAT) (EC 2.6.1.1) (Transaminase A)	HENMT1	HEN methyltransferase 1
2GPW	7RUH	0.48113	0.096	0.139	accC	Biotin carboxylase (EC 6.3.4.14) (Acetyl-coenzyme A carboxylase biotin carboxylase subunit A)	BRD4	bromodomain containing 4
1RH3	2G70	0.436635	0.118	0.221	folA	Dihydrofolate reductase (EC 1.5.1.3)	PNMT	phenylethanolamine N-methyltransferase
1ART	2WVJ	0.41862	0.106	0.191	aspC	Aspartate aminotransferase (AspAT) (EC 2.6.1.1) (Transaminase A)	TK1	thymidine kinase 1
2ABK	7NZN	0.403765	0.155	0.29	nth	Endonuclease III (EC 4.2.99.18) (DNA-(apurinic or apyrimidinic site) lyase)	RET	ret proto-oncogene
2BWX	7S3F	0.47938	0.157	0.314	pepP	Xaa-Pro aminopeptidase (EC 3.4.11.9) (Aminoacylproline aminopeptidase) (Aminopeptidase P II) (APP-II) (X-Pro aminopeptidase)	ODC1	ornithine decarboxylase 1
3UAA	7YX6	0.40651	0.094	0.159	cueO	Multicopper oxidase CueO (MCO) (EC 1.16.3.4) (Blue copper oxidase CueO) (Copper efflux oxidase) (Cu efflux oxidase) (Cuprous oxidase)	YTHDF2	YTH N6-methyladenosine RNA binding protein F2
3O6Z	5R56	0.40252	0.151	0.274	nudK	GDP-mannose pyrophosphatase (EC 3.6.1.-) (GDP-mannose hydrolase) (GDPMK)	NUDT22	nudix hydrolase 22
1TMH	3MFW	0.413305	0.193	0.302	tpiA	Triosephosphate isomerase (TIM) (TPI) (EC 5.3.1.1) (Triose-phosphate isomerase)	ARG1	arginase 1
2HPH	7NBQ	0.40446	0.134	0.287	mglB	D-galactose/methyl-galactoside binding periplasmic protein MglB (D-galactose-binding periplasmic protein) (GBP) (D-galactose/D-glucose-binding protein) (GGBP)	NNMT	nicotinamide N-methyltransferase
2ABH	5M6R	0.447045	0.16	0.288	pstS	Phosphate-binding protein PstS (PBP)	HMBS	hydroxymethylbilane synthase
5FWR	1TJJ	0.473755	0.114	0.275	fimH	Type 1 fimbrin D-mannose specific adhesin (Protein FimH)	GM2A	ganglioside GM2 activator
1FMT	3KLM	0.405735	0.188	0.338	fmt	Methionyl-tRNA formyltransferase (EC 2.1.2.9) (Met-tRNA(fMet) formyltransferase)	HSD17B1	hydroxysteroid 17-beta dehydrogenase 1
3BZM	7RUH	0.48695	0.081	0.149	menF	Isochorismate synthase MenF (EC 5.4.4.2) (Isochorismate hydroxymutase) (Isochorismate mutase)	BRD4	bromodomain containing 4
1VH5	4P0H	0.41846	0.147	0.266	menI	1,4-dihydroxy-2-naphthoyl-CoA hydrolase (DHNA-CoA hydrolase) (EC 3.1.2.28) (DHNA-CoA thioesterase)	MIF	macrophage migration inhibitory factor
4Z5C	5PR7	0.405275	0.131	0.279	hipB	Antitoxin HipB	BRD1	bromodomain containing 1
5FWR	1II6	0.404445	0.12	0.196	fimH	Type 1 fimbrin D-mannose specific adhesin (Protein FimH)	KIF11	kinesin family member 11
1RX7	4Q1F	0.40076	0.146	0.292	folA	Dihydrofolate reductase (EC 1.5.1.3)	DCK	deoxycytidine kinase
4YCO	6ZJ0	0.46283	0.106	0.231	dusC	tRNA-dihydrouridine(16) synthase (EC 1.3.1.-) (U16-specific dihydrouridine synthase) (U16-specific Dus) (tRNA-dihydrouridine synthase C)	HRAS	HRas proto-oncogene, GTPase
3QDP	1CNT	0.5187	0.12	0.24	tolA	Tol-Pal system protein TolA	CNTF	ciliary neurotrophic factor
5G1L	3RPN	0.502915	0.176	0.343	dsbG	Thiol:disulfide interchange protein DsbG	GSTK1	glutathione S-transferase kappa 1
2AB0	1DJL	0.503475	0.158	0.292	yajL	Protein/nucleic acid deglycase 3 (EC 3.1.2.-) (EC 3.5.1.-) (EC 3.5.1.124) (Chaperone protein YajL) (Maillard deglycase)	NNT	nicotinamide nucleotide transhydrogenase
2HUR	4YEA	0.50895	0.098	0.21	ndk	Nucleoside diphosphate kinase (NDK) (NDP kinase) (EC 2.7.4.6) (Nucleoside-2-P kinase)	ATOX1	antioxidant 1 copper chaperone
3ILL	5UI4	0.50328	0.149	0.297	folK	2-amino-4-hydroxy-6-hydroxymethyldihydropteridine pyrophosphokinase (EC 2.7.6.3) (6-hydroxymethyl-7,8-dihydropterin pyrophosphokinase) (PPPK) (7,8-dihydro-6-hydroxymethylpterin-pyrophosphokinase) (HPPK)	NME1	NME/NM23 nucleoside diphosphate kinase 1
3ETJ	4YLS	0.539695	0.147	0.311	purK	N5-carboxyaminoimidazole ribonucleotide synthase (N5-CAIR synthase) (EC 6.3.4.18) (5-(carboxyamino)imidazole ribonucleotide synthetase)	TTLL7	tubulin tyrosine ligase like 7
4CSS	7S3F	0.50162	0.122	0.159	fimH	Type 1 fimbrin D-mannose specific adhesin (Protein FimH)	ODC1	ornithine decarboxylase 1
1GA7	2ICK	0.569775	0.183	0.343	nudF	ADP-ribose pyrophosphatase (EC 3.6.1.13) (ADP-ribose diphosphatase) (ADP-ribose phosphohydrolase) (ASPPase) (Adenosine diphosphoribose pyrophosphatase) (ADPR-PPase)	IDI1	isopentenyl-diphosphate delta isomerase 1
1GVH	1UMO	0.54192	0.113	0.159	hmp	Flavohemoprotein (Flavohemoglobin) (HMP) (Hemoglobin-like protein) (Nitric oxide dioxygenase) (NO oxygenase) (NOD) (EC 1.14.12.17)	CYGB	cytoglobin
6G2R	1FT3	0.53797	0.191	0.34	fimH	Type 1 fimbrin D-mannose specific adhesin (Protein FimH)	ARHGDIA	Rho GDP dissociation inhibitor alpha
3IT9	3VP1	0.50107	0.15	0.291	dacC	D-alanyl-D-alanine carboxypeptidase DacC (DD-carboxypeptidase) (DD-peptidase) (EC 3.4.16.4) (Penicillin-binding protein 6) (PBP-6)	GLS	glutaminase
1MLY	7RUH	0.501155	0.089	0.138	bioA	Adenosylmethionine-8-amino-7-oxononanoate aminotransferase (EC 2.6.1.62) (7,8-diamino-pelargonic acid aminotransferase) (DAPA AT) (DAPA aminotransferase) (7,8-diaminononanoate synthase) (DANS) (Diaminopelargonic acid synthase)	BRD4	bromodomain containing 4
1THQ	7S12	0.54588	0.138	0.328	pagP	Lipid A palmitoyltransferase PagP (EC 2.3.1.251) (Lipid A acylation protein)	GID4	GID complex subunit 4 homolog
1ETX	7RUH	0.520255	0.125	0.232	fis	DNA-binding protein Fis (Factor-for-inversion stimulation protein) (Hin recombinational enhancer-binding protein)	BRD4	bromodomain containing 4
1KFN	4I1Q	0.508295	0.1	0.149	lpp	Major outer membrane lipoprotein Lpp (Braun lipoprotein) (BLP) (Murein-lipoprotein)	BIN2	bridging integrator 2
4KZ7	3VOZ	0.58363	0.166	0.279	ampC	Beta-lactamase (EC 3.5.2.6) (Cephalosporinase)	GLS	glutaminase
6CCN	1Q11	0.505405	0.127	0.23	coaD	Phosphopantetheine adenylyltransferase (EC 2.7.7.3) (Dephospho-CoA pyrophosphorylase) (Pantetheine-phosphate adenylyltransferase) (PPAT)	YARS1	tyrosyl-tRNA synthetase 1
7X9N	5R5N	0.591605	0.123	0.184	mutT	8-oxo-dGTP diphosphatase (8-oxo-dGTPase) (EC 3.6.1.55) (7,8-dihydro-8-oxoguanine-triphosphatase) (Mutator protein MutT) (dGTP pyrophosphohydrolase)	NUDT22	nudix hydrolase 22
6WBH	3UA8	0.51708	0.152	0.266	malE	Maltose/maltodextrin-binding periplasmic protein (MMBP) (Maltodextrin-binding protein) (Maltose-binding protein) (MBP)	GRIA2	glutamate ionotropic receptor AMPA type subunit 2
5WO3	7RUH	0.52976	0.188	0.357	spy	Periplasmic chaperone Spy (Spheroplast protein Y)	BRD4	bromodomain containing 4
2BJV	1XWI	0.59567	0.169	0.279	pspF	Psp operon transcriptional activator (Phage shock protein F)	VPS4B	vacuolar protein sorting 4 homolog B
1E6K	4LHV	0.59824	0.169	0.295	cheY	Chemotaxis protein CheY	RAB8A	RAB8A, member RAS oncogene family
1JUT	3EHI	0.55475	0.498	0.65	thyA	Thymidylate synthase (TS) (TSase) (EC 2.1.1.45)	TYMS	thymidylate synthetase
2Z2A	1HTI	0.51931	0.177	0.299	pyrC	Dihydroorotase (DHOase) (EC 3.5.2.3)	TPI1	triosephosphate isomerase 1
6KJ9	5G1N	0.543735	0.433	0.615	pyrB	Aspartate carbamoyltransferase catalytic subunit (EC 2.1.3.2) (Aspartate transcarbamylase) (ATCase)	CAD	carbamoyl-phosphate synthetase 2, aspartate transcarbamylase, and dihydroorotase
1R6Y	1ZZI	0.56687	0.16	0.302	ygiN	Probable quinol monooxygenase YgiN (QuMo) (EC 1.-.-.-)	HNRNPK	heterogeneous nuclear ribonucleoprotein K
1HX3	5QJF	0.57938	0.184	0.289	idi	Isopentenyl-diphosphate Delta-isomerase (IPP isomerase) (EC 5.3.3.2) (IPP:DMAPP isomerase) (Isopentenyl pyrophosphate isomerase)	NUDT5	nudix hydrolase 5
4X5Q	1FSO	0.550745	0.156	0.3	fimH	Type 1 fimbrin D-mannose specific adhesin (Protein FimH)	ARHGDIA	Rho GDP dissociation inhibitor alpha
2XHZ	7NAH	0.52923	0.129	0.298	kdsD	Arabinose 5-phosphate isomerase KdsD (API) (L-API) (EC 5.3.1.13)	SARM1	sterile alpha and TIR motif containing 1
5DML	4JS3	0.522345	0.212	0.291	mmuM	Homocysteine S-methyltransferase (EC 2.1.1.10) (S-methylmethionine:homocysteine methyltransferase)	DHODH	dihydroorotate dehydrogenase (quinone)
1XVI	2X4D	0.503845	0.173	0.32	yedP	Mannosyl-3-phosphoglycerate phosphatase (MPGP) (EC 3.1.3.70)	LHPP	phospholysine phosphohistidine inorganic pyrophosphate phosphatase
5HLD	7S3F	0.50526	0.138	0.267	mrcB	Penicillin-binding protein 1B (PBP-1b) (PBP1b) (Murein polymerase) [Includes: Penicillin-insensitive transglycosylase (EC 2.4.1.129) (Peptidoglycan TGase) (Peptidoglycan glycosyltransferase); Penicillin-sensitive transpeptidase (EC 3.4.16.4) (DD-transpeptidase)]	ODC1	ornithine decarboxylase 1
1DE5	5VXO	0.50649	0.153	0.306	rhaA	L-rhamnose isomerase (RhamIso) (EC 5.3.1.14)	CLYBL	citramalyl-CoA lyase
1RLM	1NNL	0.51532	0.148	0.317	ybiV	Sugar phosphatase YbiV (EC 3.1.3.23)	PSPH	phosphoserine phosphatase
6ENN	7RUH	0.50679	0.177	0.347	trpR	Trp operon repressor	BRD4	bromodomain containing 4
3ILI	1NSK	0.50206	0.16	0.28	folK	2-amino-4-hydroxy-6-hydroxymethyldihydropteridine pyrophosphokinase (EC 2.7.6.3) (6-hydroxymethyl-7,8-dihydropterin pyrophosphokinase) (PPPK) (7,8-dihydro-6-hydroxymethylpterin-pyrophosphokinase) (HPPK)	NME2	NME/NM23 nucleoside diphosphate kinase 2
5XU7	4E9M	0.512735	0.149	0.314	acpS	Holo-[acyl-carrier-protein] synthase (Holo-ACP synthase) (EC 2.7.8.7) (4'-phosphopantetheinyl transferase AcpS)	NOD1	nucleotide binding oligomerization domain containing 1
3ANM	7DPO	0.50088	0.092	0.155	dxr	1-deoxy-D-xylulose 5-phosphate reductoisomerase (DXP reductoisomerase) (EC 1.1.1.267) (1-deoxyxylulose-5-phosphate reductoisomerase) (2-C-methyl-D-erythritol 4-phosphate synthase)	BRD2	bromodomain containing 2
2GFW	2P8U	0.54002	0.154	0.301	fabF	3-oxoacyl-[acyl-carrier-protein] synthase 2 (EC 2.3.1.179) (3-oxoacyl-[acyl-carrier-protein] synthase II) (Beta-ketoacyl-ACP synthase II) (KAS II)	HMGCS1	3-hydroxy-3-methylglutaryl-CoA synthase 1
7X9H	5R53	0.59131	0.123	0.184	mutT	8-oxo-dGTP diphosphatase (8-oxo-dGTPase) (EC 3.6.1.55) (7,8-dihydro-8-oxoguanine-triphosphatase) (Mutator protein MutT) (dGTP pyrophosphohydrolase)	NUDT22	nudix hydrolase 22
2W6N	4NZN	0.572515	0.155	0.309	accC	Biotin carboxylase (EC 6.3.4.14) (Acetyl-coenzyme A carboxylase biotin carboxylase subunit A)	PPIP5K2	diphosphoinositol pentakisphosphate kinase 2
2QZS	5LVV	0.514005	0.148	0.27	glgA	Glycogen synthase (EC 2.4.1.21) (Starch [bacterial glycogen] synthase)	OGT	O-linked N-acetylglucosamine (GlcNAc) transferase
1AMS	8AQL	0.53637	0.136	0.269	aspC	Aspartate aminotransferase (AspAT) (EC 2.6.1.1) (Transaminase A)	SHMT2	serine hydroxymethyltransferase 2
1T8Z	1H7I	0.504965	0.099	0.191	lpp	Major outer membrane lipoprotein Lpp (Braun lipoprotein) (BLP) (Murein-lipoprotein)	APOE	apolipoprotein E
1E24	4R4O	0.552895	0.086	0.14	lysU	Lysine--tRNA ligase, heat inducible (EC 6.1.1.6) (Lysyl-tRNA synthetase) (LysRS)	RPA1	replication protein A1
1T4B	7S3F	0.502295	0.176	0.311	asd	Aspartate-semialdehyde dehydrogenase (ASA dehydrogenase) (ASADH) (EC 1.2.1.11) (Aspartate-beta-semialdehyde dehydrogenase)	ODC1	ornithine decarboxylase 1
1OG6	5MVD	0.55133	0.176	0.335	ydhF	Oxidoreductase YdhF (EC 1.-.-.-)	DHODH	dihydroorotate dehydrogenase (quinone)
1RMY	1Z4Q	0.575515	0.143	0.286	aphA	Class B acid phosphatase (CBAP) (EC 3.1.3.2)	NT5M	5',3'-nucleotidase, mitochondrial
2PII	3IWL	0.55542	0.168	0.283	glnB	Nitrogen regulatory protein P-II 1	ATOX1	antioxidant 1 copper chaperone
1DI7	3LUJ	0.56859	0.137	0.305	mog	Molybdopterin adenylyltransferase (MPT adenylyltransferase) (EC 2.7.7.75)	AGO2	argonaute RISC catalytic component 2
1ZEN	6GK0	0.532345	0.132	0.3	fbaA	Fructose-bisphosphate aldolase class 2 (FBP aldolase) (FBPA) (EC 4.1.2.13) (Fructose-1,6-bisphosphate aldolase) (Fructose-bisphosphate aldolase class II) (Sedoheptulose bisphosphate aldolase)	DHODH	dihydroorotate dehydrogenase (quinone)
1GA7	5R65	0.53508	0.157	0.327	nudF	ADP-ribose pyrophosphatase (EC 3.6.1.13) (ADP-ribose diphosphatase) (ADP-ribose phosphohydrolase) (ASPPase) (Adenosine diphosphoribose pyrophosphatase) (ADPR-PPase)	NUDT21	nudix hydrolase 21
2D5Y	8AQL	0.533195	0.136	0.267	aspC	Aspartate aminotransferase (AspAT) (EC 2.6.1.1) (Transaminase A)	SHMT2	serine hydroxymethyltransferase 2
3QN6	6I35	0.509415	0.119	0.202	aspC	Aspartate aminotransferase (AspAT) (EC 2.6.1.1) (Transaminase A)	GLDC	glycine decarboxylase
1MIH	3LO5	0.58042	0.15	0.361	cheY	Chemotaxis protein CheY	HRAS	HRas proto-oncogene, GTPase
4KJK	7DPO	0.50313	0.141	0.233	folA	Dihydrofolate reductase (EC 1.5.1.3)	BRD2	bromodomain containing 2
1K5H	7S3F	0.503285	0.148	0.293	dxr	1-deoxy-D-xylulose 5-phosphate reductoisomerase (DXP reductoisomerase) (EC 1.1.1.267) (1-deoxyxylulose-5-phosphate reductoisomerase) (2-C-methyl-D-erythritol 4-phosphate synthase)	ODC1	ornithine decarboxylase 1
6DQI	7NAG	0.59492	0.169	0.373	ssuE	FMN reductase (NADPH) (EC 1.5.1.38) (FMN reductase) (Sulfate starvation-induced protein 4) (SSI4)	SARM1	sterile alpha and TIR motif containing 1
3RVO	1GNQ	0.593655	0.155	0.333	cheY	Chemotaxis protein CheY	HRAS	HRas proto-oncogene, GTPase
1EW8	5UDY	0.50363	0.169	0.264	phoA	Alkaline phosphatase (APase) (EC 3.1.3.1)	ENPP7	ectonucleotide pyrophosphatase/phosphodiesterase 7
2W6M	4NZM	0.5732	0.154	0.308	accC	Biotin carboxylase (EC 6.3.4.14) (Acetyl-coenzyme A carboxylase biotin carboxylase subunit A)	PPIP5K2	diphosphoinositol pentakisphosphate kinase 2
1AHE	6I33	0.51387	0.121	0.204	aspC	Aspartate aminotransferase (AspAT) (EC 2.6.1.1) (Transaminase A)	GLDC	glycine decarboxylase
2W6M	2QB5	0.54903	0.141	0.278	accC	Biotin carboxylase (EC 6.3.4.14) (Acetyl-coenzyme A carboxylase biotin carboxylase subunit A)	ITPK1	inositol-tetrakisphosphate 1-kinase
2WNN	3ZWS	0.55537	0.178	0.319	nanA	N-acetylneuraminate lyase (NAL) (Neu5Ac lyase) (EC 4.1.3.3) (N-acetylneuraminate pyruvate-lyase) (N-acetylneuraminic acid aldolase) (NALase) (Sialate lyase) (Sialic acid aldolase) (Sialic acid lyase)	DHODH	dihydroorotate dehydrogenase (quinone)
2H75	1QMV	0.56769	0.142	0.274	trxA	Thioredoxin 1 (Trx-1)	PRDX2	peroxiredoxin 2
2CMD	1HE4	0.537655	0.169	0.268	mdh	Malate dehydrogenase (EC 1.1.1.37)	BLVRB	biliverdin reductase B
1I7H	2GBM	0.52532	0.155	0.309	fdx	2Fe-2S ferredoxin	UBC	ubiquitin C
5QKO	3RPN	0.59658	0.153	0.311	dsbA	Thiol:disulfide interchange protein DsbA	GSTK1	glutathione S-transferase kappa 1
4CNE	6H0X	0.501705	0.126	0.231	trmJ	tRNA (cytidine/uridine-2'-O-)-methyltransferase TrmJ (EC 2.1.1.200) (TrMet(Xm32)) (tRNA (cytidine(32)/uridine(32)-2'-O)-methyltransferase) (tRNA Cm32/Um32 methyltransferase)	KDM4D	lysine demethylase 4D
2X5J	7S3F	0.52228	0.166	0.315	epd	D-erythrose-4-phosphate dehydrogenase (E4PDH) (EC 1.2.1.72)	ODC1	ornithine decarboxylase 1
1ZJL	3R7X	0.527275	0.163	0.297	malE	Maltose/maltodextrin-binding periplasmic protein (MMBP) (Maltodextrin-binding protein) (Maltose-binding protein) (MBP)	GRIA2	glutamate ionotropic receptor AMPA type subunit 2
1TD2	1UCF	0.52191	0.183	0.277	pdxY	Pyridoxal kinase PdxY (PL kinase) (EC 2.7.1.35) (Pyridoxal kinase 2) (PL kinase 2)	PARK7	Parkinsonism associated deglycase
2NPG	6QD5	0.543455	0.167	0.312	amtB	Ammonium transporter AmtB (Ammonia channel AmtB) (Ammonium channel AmtB)	SLC14A1	solute carrier family 14 member 1 (Kidd blood group)
4I0B	3OTF	0.501205	0.139	0.306	crp	cAMP-activated global transcriptional regulator CRP (Catabolite activator protein) (CAP) (Catabolite gene activator) (cAMP receptor protein) (CRP) (cAMP regulatory protein)	HCN4	hyperpolarization activated cyclic nucleotide gated potassium channel 4
1NZU	5JYP	0.507535	0.186	0.275	dacA	D-alanyl-D-alanine carboxypeptidase DacA (DD-carboxypeptidase) (DD-peptidase) (EC 3.4.16.4) (Beta-lactamase) (EC 3.5.2.6) (Penicillin-binding protein 5) (PBP-5)	GLS	glutaminase
4KZB	5D3O	0.52959	0.174	0.311	ampC	Beta-lactamase (EC 3.5.2.6) (Cephalosporinase)	GLS	glutaminase
3LGY	7TNH	0.560085	0.142	0.27	degS	Serine endoprotease DegS (EC 3.4.21.107) (Site-1 protease DegS) (S1P protease DegS) (Site-1-type intramembrane protease)	CSF1R	colony stimulating factor 1 receptor
3FKW	3VP0	0.58823	0.167	0.285	ampC	Beta-lactamase (EC 3.5.2.6) (Cephalosporinase)	GLS	glutaminase
5DFR	7NE6	0.50106	0.103	0.177	folA	Dihydrofolate reductase (EC 1.5.1.3)	TET2	tet methylcytosine dioxygenase 2
3HYT	1IOZ	0.58862	0.162	0.308	feoB	Fe(2+) transporter FeoB (Ferrous iron transport protein B)	HRAS	HRas proto-oncogene, GTPase
1ZRQ	5ZF9	0.50799	0.16	0.285	metF	5,10-methylenetetrahydrofolate reductase (MTHFR) (EC 1.5.1.54) (NADH-dependent 5,10-methylenetetrahydrofolate reductase)	DHODH	dihydroorotate dehydrogenase (quinone)
2G6W	6I33	0.560265	0.111	0.196	bioF	8-amino-7-oxononanoate synthase (AONS) (EC 2.3.1.47) (7-keto-8-amino-pelargonic acid synthase) (7-KAP synthase) (KAPA synthase) (8-amino-7-ketopelargonate synthase)	GLDC	glycine decarboxylase
4AKE	7SQL	0.56313	0.161	0.317	adk	Adenylate kinase (AK) (EC 2.7.4.3) (ATP-AMP transphosphorylase) (ATP:AMP phosphotransferase) (Adenylate monophosphate kinase)	UCK2	uridine-cytidine kinase 2
2PU4	5FI6	0.51775	0.183	0.315	ampC	Beta-lactamase (EC 3.5.2.6) (Cephalosporinase)	GLS	glutaminase
2DGK	7EIY	0.51002	0.165	0.31	gadB	Glutamate decarboxylase beta (GAD-beta) (EC 4.1.1.15)	HDC	histidine decarboxylase
2YPN	5YBF	0.516335	0.135	0.293	hemC	Porphobilinogen deaminase (PBG) (EC 2.5.1.61) (Hydroxymethylbilane synthase) (HMBS) (Pre-uroporphyrinogen synthase)	GRIA2	glutamate ionotropic receptor AMPA type subunit 2
4F5L	5QR0	0.525825	0.178	0.341	aspC	Aspartate aminotransferase (AspAT) (EC 2.6.1.1) (Transaminase A)	ALAS2	5'-aminolevulinate synthase 2
3B6K	1SOA	0.531045	0.172	0.305	wrbA	NAD(P)H dehydrogenase (quinone) (EC 1.6.5.2) (Flavoprotein WrbA) (NAD(P)H:quinone oxidoreductase) (NQO)	PARK7	Parkinsonism associated deglycase
3G0Y	2WYA	0.54136	0.165	0.289	fabF	3-oxoacyl-[acyl-carrier-protein] synthase 2 (EC 2.3.1.179) (3-oxoacyl-[acyl-carrier-protein] synthase II) (Beta-ketoacyl-ACP synthase II) (KAS II)	HMGCS2	3-hydroxy-3-methylglutaryl-CoA synthase 2
7CF7	7RUH	0.51808	0.121	0.242	rlmH	Ribosomal RNA large subunit methyltransferase H (EC 2.1.1.177) (23S rRNA (pseudouridine1915-N3)-methyltransferase) (23S rRNA m3Psi1915 methyltransferase) (rRNA (pseudouridine-N3-)-methyltransferase RlmH)	BRD4	bromodomain containing 4
2BN7	1R5G	0.50326	0.155	0.305	pepP	Xaa-Pro aminopeptidase (EC 3.4.11.9) (Aminoacylproline aminopeptidase) (Aminopeptidase P II) (APP-II) (X-Pro aminopeptidase)	METAP2	methionyl aminopeptidase 2
5YUU	7U73	0.50219	0.262	0.403	dinB	DNA polymerase IV (Pol IV) (EC 2.7.7.7) (Translesion synthesis polymerase IV) (TSL polymerase IV)	POLH	DNA polymerase eta
1PMM	8AQL	0.57955	0.158	0.305	gadB	Glutamate decarboxylase beta (GAD-beta) (EC 4.1.1.15)	SHMT2	serine hydroxymethyltransferase 2
6CVD	3IHL	0.537815	0.148	0.281	ftsY	Signal recognition particle receptor FtsY (SRP receptor)	CTPS2	CTP synthase 2
2IPL	4F12	0.54181	0.164	0.312	mglB	D-galactose/methyl-galactoside binding periplasmic protein MglB (D-galactose-binding periplasmic protein) (GBP) (D-galactose/D-glucose-binding protein) (GGBP)	GABBR2	gamma-aminobutyric acid type B receptor subunit 2
1FR9	5C38	0.55709	0.158	0.284	mobA	Molybdenum cofactor guanylyltransferase (MoCo guanylyltransferase) (EC 2.7.7.77) (GTP:molybdopterin guanylyltransferase) (Mo-MPT guanylyltransferase) (Molybdopterin guanylyltransferase) (Molybdopterin-guanine dinucleotide biosynthesis protein A) (Molybdopterin-guanine dinucleotide synthase) (MGD synthase) (Protein FA)	ABO	ABO, alpha 1-3-N-acetylgalactosaminyltransferase and alpha 1-3-galactosyltransferase
1GA7	2J8Q	0.53457	0.155	0.305	nudF	ADP-ribose pyrophosphatase (EC 3.6.1.13) (ADP-ribose diphosphatase) (ADP-ribose phosphohydrolase) (ASPPase) (Adenosine diphosphoribose pyrophosphatase) (ADPR-PPase)	NUDT21	nudix hydrolase 21
6CHL	5THH	0.5055	0.136	0.255	coaD	Phosphopantetheine adenylyltransferase (EC 2.7.7.3) (Dephospho-CoA pyrophosphorylase) (Pantetheine-phosphate adenylyltransferase) (PPAT)	YARS1	tyrosyl-tRNA synthetase 1
1KNR	3ZNQ	0.503825	0.16	0.276	nadB	L-aspartate oxidase (LASPO) (EC 1.4.3.16) (L-aspartate:fumarate oxidoreductase) (EC 1.5.99.-) (Quinolinate synthetase B)	DAO	D-amino acid oxidase
5E3N	7RUH	0.5064	0.148	0.304	fis	DNA-binding protein Fis (Factor-for-inversion stimulation protein) (Hin recombinational enhancer-binding protein)	BRD4	bromodomain containing 4
6WN6	3OVR	0.625455	0.196	0.321	ycjR	3-dehydro-D-guloside 4-epimerase (EC 5.1.3.-) (3-keto-D-guloside 4-epimerase)	RPE	ribulose-5-phosphate-3-epimerase
2IPL	4XAQ	0.629635	0.162	0.288	mglB	D-galactose/methyl-galactoside binding periplasmic protein MglB (D-galactose-binding periplasmic protein) (GBP) (D-galactose/D-glucose-binding protein) (GGBP)	GRM2	glutamate metabotropic receptor 2
1F5V	4TTB	0.671825	0.156	0.296	nfsA	Oxygen-insensitive NADPH nitroreductase (EC 1.-.-.-) (Modulator of drug activity A)	IYD	iodotyrosine deiodinase
4HU9	1QGV	0.650725	0.144	0.348	trxA	Thioredoxin 1 (Trx-1)	TXNL4A	thioredoxin like 4A
1A16	2B3H	0.609845	0.169	0.305	pepP	Xaa-Pro aminopeptidase (EC 3.4.11.9) (Aminoacylproline aminopeptidase) (Aminopeptidase P II) (APP-II) (X-Pro aminopeptidase)	METAP1	methionyl aminopeptidase 1
1GET	6OIB	0.651525	0.165	0.348	gor	Glutathione reductase (GR) (GRase) (EC 1.8.1.7)	SQOR	sulfide quinone oxidoreductase
5QLY	1YZX	0.600055	0.155	0.309	dsbA	Thiol:disulfide interchange protein DsbA	GSTK1	glutathione S-transferase kappa 1
1PV2	3CZ9	0.691385	0.193	0.3	hchA	Protein/nucleic acid deglycase 1 (EC 3.1.2.-) (EC 3.5.1.-) (EC 3.5.1.124) (Glyoxalase III) (EC 4.2.1.130) (Holding molecular chaperone) (Hsp31) (Maillard deglycase)	PARK7	Parkinsonism associated deglycase
2O5W	5QGX	0.63136	0.176	0.332	nudB	Dihydroneopterin triphosphate diphosphatase (EC 3.6.1.67) (Dihydroneopterin triphosphate pyrophosphatase) (dATP pyrophosphohydrolase)	NUDT7	nudix hydrolase 7
1KDR	5JZV	0.60598	0.178	0.329	cmk	Cytidylate kinase (CK) (EC 2.7.4.25) (Cytidine monophosphate kinase) (CMP kinase) (Protein MssA) (p25)	AK6	adenylate kinase 6
1L2U	3ZWS	0.601475	0.163	0.282	pyrF	Orotidine 5'-phosphate decarboxylase (EC 4.1.1.23) (OMP decarboxylase) (OMPDCase) (OMPdecase)	DHODH	dihydroorotate dehydrogenase (quinone)
3DXY	4XUE	0.620475	0.142	0.305	trmB	tRNA (guanine-N(7)-)-methyltransferase (EC 2.1.1.33) (tRNA (guanine(46)-N(7))-methyltransferase) (tRNA(m7G46)-methyltransferase)	COMT	catechol-O-methyltransferase
3K8D	1V84	0.60155	0.143	0.282	kdsB	3-deoxy-manno-octulosonate cytidylyltransferase (EC 2.7.7.38) (CMP-2-keto-3-deoxyoctulosonic acid synthase) (CKS) (CMP-KDO synthase)	B3GAT1	beta-1,3-glucuronyltransferase 1
4Z9H	1O3X	0.606135	0.157	0.325	tar	Methyl-accepting chemotaxis protein II (MCP-II) (Aspartate chemoreceptor protein)	GGA1	golgi associated, gamma adaptin ear containing, ARF binding protein 1
1DAD	7MGZ	0.67088	0.125	0.185	bioD1	ATP-dependent dethiobiotin synthetase BioD 1 (EC 6.3.3.3) (DTB synthetase 1) (DTBS 1) (Dethiobiotin synthase 1)	CTPS1	CTP synthase 1
6G8B	3FUI	0.68622	0.175	0.298	pepN	Aminopeptidase N (EC 3.4.11.2) (Alpha-aminoacylpeptide hydrolase)	LTA4H	leukotriene A4 hydrolase
1MKB	4AE8	0.61439	0.167	0.317	fabA	3-hydroxydecanoyl-[acyl-carrier-protein] dehydratase (EC 4.2.1.59) (3-hydroxyacyl-[acyl-carrier-protein] dehydratase FabA) (Beta-hydroxydecanoyl thioester dehydrase) (Trans-2-decenoyl-[acyl-carrier-protein] isomerase) (EC 5.3.3.14)	THEM4	thioesterase superfamily member 4
4K4B	2QQ2	0.6589	0.134	0.293	menI	1,4-dihydroxy-2-naphthoyl-CoA hydrolase (DHNA-CoA hydrolase) (EC 3.1.2.28) (DHNA-CoA thioesterase)	ACOT7	acyl-CoA thioesterase 7
1AAM	6HRH	0.655955	0.173	0.336	aspC	Aspartate aminotransferase (AspAT) (EC 2.6.1.1) (Transaminase A)	ALAS2	5'-aminolevulinate synthase 2
5GY7	6MNC	0.61501	0.201	0.325	galE	UDP-glucose 4-epimerase (EC 5.1.3.2) (Galactowaldenase) (UDP-galactose 4-epimerase)	HSD17B1	hydroxysteroid 17-beta dehydrogenase 1
1S5U	2QQ2	0.661845	0.159	0.306	ybgC	Acyl-CoA thioester hydrolase YbgC (Acyl-CoA thioesterase) (EC 3.1.2.-)	ACOT7	acyl-CoA thioesterase 7
1B57	3BGJ	0.602535	0.138	0.299	fbaA	Fructose-bisphosphate aldolase class 2 (FBP aldolase) (FBPA) (EC 4.1.2.13) (Fructose-1,6-bisphosphate aldolase) (Fructose-bisphosphate aldolase class II) (Sedoheptulose bisphosphate aldolase)	UMPS	uridine monophosphate synthetase
5QM2	1YZX	0.603165	0.155	0.309	dsbA	Thiol:disulfide interchange protein DsbA	GSTK1	glutathione S-transferase kappa 1
4C5C	3T9E	0.665945	0.174	0.327	ddlB	D-alanine--D-alanine ligase B (EC 6.3.2.4) (D-Ala-D-Ala ligase B) (D-alanylalanine synthetase B)	PPIP5K2	diphosphoinositol pentakisphosphate kinase 2
1GNK	2ZFH	0.6942	0.116	0.339	glnK	Nitrogen regulatory protein GlnK (Nitrogen regulatory protein P-II 2) (PII-like protein)	CUTA	cutA divalent cation tolerance homolog
7JY6	4HYY	0.68603	0.195	0.323	recA	Protein RecA (Recombinase A)	DMC1	DNA meiotic recombinase 1
6PVY	1YZX	0.600615	0.155	0.309	dsbA	Thiol:disulfide interchange protein DsbA	GSTK1	glutathione S-transferase kappa 1
3BI3	4NRO	0.675155	0.229	0.377	alkB	Alpha-ketoglutarate-dependent dioxygenase AlkB (EC 1.14.11.33) (Alkylated DNA repair protein AlkB) (DNA oxidative demethylase AlkB)	ALKBH5	alkB homolog 5, RNA demethylase
1QG6	5IN4	0.61575	0.151	0.294	fabI	Enoyl-[acyl-carrier-protein] reductase [NADH] FabI (ENR) (EC 1.3.1.9) (NADH-dependent enoyl-ACP reductase)	GMDS	GDP-mannose 4,6-dehydratase
6CHY	6O46	0.601105	0.158	0.322	cheY	Chemotaxis protein CheY	KRAS	KRAS proto-oncogene, GTPase
5QOG	1YZX	0.608695	0.155	0.309	dsbA	Thiol:disulfide interchange protein DsbA	GSTK1	glutathione S-transferase kappa 1
3DYP	3HN3	0.655655	0.159	0.251	lacZ	Beta-galactosidase (Beta-gal) (EC 3.2.1.23) (Lactase)	GUSB	glucuronidase beta
2EFT	2IBU	0.657895	0.187	0.326	fabH	Beta-ketoacyl-[acyl-carrier-protein] synthase III (Beta-ketoacyl-ACP synthase III) (KAS III) (EC 2.3.1.180) (3-oxoacyl-[acyl-carrier-protein] synthase 3) (3-oxoacyl-[acyl-carrier-protein] synthase III) (EcFabH)	ACAT1	acetyl-CoA acetyltransferase 1
6N97	1TG6	0.62112	0.159	0.299	scpB	Methylmalonyl-CoA decarboxylase (MMCD) (EC 4.1.1.-) (Transcarboxylase)	CLPP	caseinolytic mitochondrial matrix peptidase proteolytic subunit
6H6N	6Z1W	0.667795	0.163	0.318	ubiJ	Ubiquinone biosynthesis accessory factor UbiJ	HSD17B4	hydroxysteroid 17-beta dehydrogenase 4
6N92	1TG6	0.621985	0.159	0.299	scpB	Methylmalonyl-CoA decarboxylase (MMCD) (EC 4.1.1.-) (Transcarboxylase)	CLPP	caseinolytic mitochondrial matrix peptidase proteolytic subunit
2FDG	2Y34	0.607255	0.134	0.269	alkB	Alpha-ketoglutarate-dependent dioxygenase AlkB (EC 1.14.11.33) (Alkylated DNA repair protein AlkB) (DNA oxidative demethylase AlkB)	EGLN1	egl-9 family hypoxia inducible factor 1
1ZES	2H18	0.60037	0.126	0.309	phoB	Phosphate regulon transcriptional regulatory protein PhoB	ARL8A	ADP ribosylation factor like GTPase 8A
3RVN	2GJS	0.61623	0.158	0.322	cheY	Chemotaxis protein CheY	RRAD	RRAD, Ras related glycolysis inhibitor and calcium channel regulator
7JH3	6TOR	0.67266	0.27	0.448	puuE	4-aminobutyrate aminotransferase PuuE (EC 2.6.1.19) (GABA aminotransferase) (GABA-AT) (Gamma-amino-N-butyrate transaminase) (GABA transaminase) (Glutamate:succinic semialdehyde transaminase)	ETNPPL	ethanolamine-phosphate phospho-lyase
3V9X	7LPZ	0.69981	0.172	0.344	rnt	Ribonuclease T (EC 3.1.13.-) (Exoribonuclease T) (RNase T)	ERI3	ERI1 exoribonuclease family member 3
5QKP	1YZX	0.6006	0.155	0.309	dsbA	Thiol:disulfide interchange protein DsbA	GSTK1	glutathione S-transferase kappa 1
6PLI	3RPP	0.604115	0.16	0.32	dsbA	Thiol:disulfide interchange protein DsbA	GSTK1	glutathione S-transferase kappa 1
6P83	3TV0	0.60705	0.142	0.252	lpxD	UDP-3-O-(3-hydroxymyristoyl)glucosamine N-acyltransferase (UDP-3-O-(3-OHC14)-GlcN N-acyltransferase) (EC 2.3.1.191) (Protein FirA) (Rifampicin resistance protein) (UDP-3-O-(3-hydroxytetradecanoyl)glucosamine N-acyltransferase)	DCTN6	dynactin subunit 6
4ZP0	6OB7	0.68844	0.183	0.341	mdfA	Multidrug transporter MdfA (Chloramphenicol resistance pump Cmr)	SLC29A1	solute carrier family 29 member 1 (Augustine blood group)
1IOW	5BYA	0.668165	0.172	0.331	ddlB	D-alanine--D-alanine ligase B (EC 6.3.2.4) (D-Ala-D-Ala ligase B) (D-alanylalanine synthetase B)	PPIP5K2	diphosphoinositol pentakisphosphate kinase 2
1JZ5	3HN3	0.65543	0.159	0.251	lacZ	Beta-galactosidase (Beta-gal) (EC 3.2.1.23) (Lactase)	GUSB	glucuronidase beta
6R1M	7F98	0.68643	0.155	0.292	serS	Serine--tRNA ligase (EC 6.1.1.11) (Seryl-tRNA synthetase) (SerRS) (Seryl-tRNA(Ser/Sec) synthetase)	EPRS1	glutamyl-prolyl-tRNA synthetase 1
1EFA	2WJW	0.618105	0.133	0.287	lacI	Lactose operon repressor	GRIA2	glutamate ionotropic receptor AMPA type subunit 2
1URP	3SM9	0.61804	0.164	0.269	rbsB	Ribose import binding protein RbsB	GRM3	glutamate metabotropic receptor 3
2W6N	2P0A	0.6161	0.148	0.276	accC	Biotin carboxylase (EC 6.3.4.14) (Acetyl-coenzyme A carboxylase biotin carboxylase subunit A)	SYN3	synapsin III
1HNJ	2IIK	0.65119	0.149	0.283	fabH	Beta-ketoacyl-[acyl-carrier-protein] synthase III (Beta-ketoacyl-ACP synthase III) (KAS III) (EC 2.3.1.180) (3-oxoacyl-[acyl-carrier-protein] synthase 3) (3-oxoacyl-[acyl-carrier-protein] synthase III) (EcFabH)	ACAA1	acetyl-CoA acyltransferase 1
3HL8	7K05	0.640215	0.118	0.201	sbcB	Exodeoxyribonuclease I (ExoI) (Exonuclease I) (EC 3.1.11.1) (DNA deoxyribophosphodiesterase) (dRPase)	ERI3	ERI1 exoribonuclease family member 3
4XKS	6D5X	0.611325	0.135	0.294	bfr	Bacterioferritin (BFR) (EC 1.16.3.1) (Cytochrome b-1) (Cytochrome b-557)	MMAB	metabolism of cobalamin associated B
1P3W	6NBA	0.696395	0.213	0.351	iscS	Cysteine desulfurase IscS (EC 2.8.1.7) (NifS protein homolog) (ThiI transpersulfidase) (TusA transpersulfidase)	CTH	cystathionine gamma-lyase
2G25	5RVZ	0.63108	0.153	0.308	aceE	Pyruvate dehydrogenase E1 component (PDH E1 component) (EC 1.2.4.1)	DHTKD1	dehydrogenase E1 and transketolase domain containing 1
7P2W	7RCI	0.60111	0.167	0.277	gyrB	DNA gyrase subunit B (EC 5.6.2.2) (Type IIA topoisomerase subunit GyrB)	PMS2	PMS1 homolog 2, mismatch repair system component
5QM6	3RPP	0.60488	0.16	0.32	dsbA	Thiol:disulfide interchange protein DsbA	GSTK1	glutathione S-transferase kappa 1
1G7V	3OVP	0.674705	0.153	0.289	kdsA	2-dehydro-3-deoxyphosphooctonate aldolase (EC 2.5.1.55) (3-deoxy-D-manno-octulosonic acid 8-phosphate synthase) (KDO-8-phosphate synthase) (KDO 8-P synthase) (KDOPS) (Phospho-2-dehydro-3-deoxyoctonate aldolase)	RPE	ribulose-5-phosphate-3-epimerase
3BKU	3TOQ	0.626555	0.155	0.278	nikR	Nickel-responsive regulator	ACYP1	acylphosphatase 1
2W6O	2P0A	0.618955	0.148	0.276	accC	Biotin carboxylase (EC 6.3.4.14) (Acetyl-coenzyme A carboxylase biotin carboxylase subunit A)	SYN3	synapsin III
6UTM	5C7L	0.685175	0.611	0.773	gapA	Glyceraldehyde-3-phosphate dehydrogenase A (GAPDH-A) (EC 1.2.1.12) (NAD-dependent glyceraldehyde-3-phosphate dehydrogenase)	GAPDHS	glyceraldehyde-3-phosphate dehydrogenase, spermatogenic
1ALN	1MQ0	0.610885	0.141	0.201	cdd	Cytidine deaminase (EC 3.5.4.5) (Cytidine aminohydrolase) (CDA)	CDA	cytidine deaminase
2VB8	2IB9	0.628965	0.188	0.345	fabB	3-oxoacyl-[acyl-carrier-protein] synthase 1 (EC 2.3.1.41) (3-oxoacyl-[acyl-carrier-protein] synthase I) (Beta-ketoacyl-ACP synthase I) (KAS I)	ACAT1	acetyl-CoA acetyltransferase 1
1IOW	4NZO	0.65842	0.174	0.327	ddlB	D-alanine--D-alanine ligase B (EC 6.3.2.4) (D-Ala-D-Ala ligase B) (D-alanylalanine synthetase B)	PPIP5K2	diphosphoinositol pentakisphosphate kinase 2
6TSH	1BHG	0.6467	0.158	0.249	lacZ	Beta-galactosidase (Beta-gal) (EC 3.2.1.23) (Lactase)	GUSB	glucuronidase beta
1C23	6SRE	0.614605	0.163	0.272	map	Methionine aminopeptidase (MAP) (MetAP) (EC 3.4.11.18) (Peptidase M)	PEPD	peptidase D
1EQR	6ILH	0.672735	0.215	0.358	aspS	Aspartate--tRNA ligase (EC 6.1.1.12) (Aspartyl-tRNA synthetase) (AspRS)	KARS1	lysyl-tRNA synthetase 1
2QB2	5QR6	0.65879	0.185	0.347	aspC	Aspartate aminotransferase (AspAT) (EC 2.6.1.1) (Transaminase A)	ALAS2	5'-aminolevulinate synthase 2
7C7O	7S99	0.664765	0.158	0.342	gyrB	DNA gyrase subunit B (EC 5.6.2.2) (Type IIA topoisomerase subunit GyrB)	HSP90AA1	heat shock protein 90 alpha family class A member 1
3VB2	3F21	0.615045	0.124	0.226	marR	Multiple antibiotic resistance protein MarR	ADAR	adenosine deaminase RNA specific
7ACO	6DEW	0.60875	0.195	0.38	rcdA	HTH-type transcriptional regulator RcdA (Regulator of csgD)	COQ9	coenzyme Q9
1FWY	1JV3	0.616715	0.148	0.293	glmU	Bifunctional protein GlmU [Includes: UDP-N-acetylglucosamine pyrophosphorylase (EC 2.7.7.23) (N-acetylglucosamine-1-phosphate uridyltransferase); Glucosamine-1-phosphate N-acetyltransferase (EC 2.3.1.157)]	UAP1	UDP-N-acetylglucosamine pyrophosphorylase 1
1KNQ	2NO9	0.614255	0.163	0.28	gntK	Thermoresistant gluconokinase (EC 2.7.1.12) (Gluconate kinase 2)	DCK	deoxycytidine kinase
4KFG	7RCI	0.61129	0.164	0.264	gyrB	DNA gyrase subunit B (EC 5.6.2.2) (Type IIA topoisomerase subunit GyrB)	PMS2	PMS1 homolog 2, mismatch repair system component
3I8S	3CBQ	0.605725	0.149	0.279	feoB	Fe(2+) transporter FeoB (Ferrous iron transport protein B)	REM2	RRAD and GEM like GTPase 2
6OOP	6OB7	0.687655	0.168	0.339	mdfA	Multidrug transporter MdfA (Chloramphenicol resistance pump Cmr)	SLC29A1	solute carrier family 29 member 1 (Augustine blood group)
2IPN	3LMK	0.6288	0.168	0.273	mglB	D-galactose/methyl-galactoside binding periplasmic protein MglB (D-galactose-binding periplasmic protein) (GBP) (D-galactose/D-glucose-binding protein) (GGBP)	GRM5	glutamate metabotropic receptor 5
6R1M	7F99	0.686905	0.154	0.296	serS	Serine--tRNA ligase (EC 6.1.1.11) (Seryl-tRNA synthetase) (SerRS) (Seryl-tRNA(Ser/Sec) synthetase)	EPRS1	glutamyl-prolyl-tRNA synthetase 1
1G5X	1WL5	0.63177	0.18	0.323	fabB	3-oxoacyl-[acyl-carrier-protein] synthase 1 (EC 2.3.1.41) (3-oxoacyl-[acyl-carrier-protein] synthase I) (Beta-ketoacyl-ACP synthase I) (KAS I)	ACAT2	acetyl-CoA acetyltransferase 2
5MFT	3FHE	0.68793	0.175	0.299	pepN	Aminopeptidase N (EC 3.4.11.2) (Alpha-aminoacylpeptide hydrolase)	LTA4H	leukotriene A4 hydrolase
4CVP	3VPO	0.602095	0.122	0.26	bfr	Bacterioferritin (BFR) (EC 1.16.3.1) (Cytochrome b-1) (Cytochrome b-557)	RRM2	ribonucleotide reductase regulatory subunit M2
1AHH	1I3K	0.65022	0.167	0.279	hdhA	7alpha-hydroxysteroid dehydrogenase (7alpha-HSDH) (EC 1.1.1.159) (NAD-dependent 7alpha-hydroxysteroid dehydrogenase)	GALE	UDP-galactose-4-epimerase
4MYD	6QGO	0.608265	0.149	0.309	menH	2-succinyl-6-hydroxy-2,4-cyclohexadiene-1-carboxylate synthase (SHCHC synthase) (EC 4.2.99.20)	LYPLA1	lysophospholipase 1
3L8E	3L5K	0.62632	0.174	0.322	gmhB	D-glycero-beta-D-manno-heptose-1,7-bisphosphate 7-phosphatase (EC 3.1.3.82) (D,D-heptose 1,7-bisphosphate phosphatase) (HBP phosphatase)	PUDP	pseudouridine 5'-phosphatase
6IO6	5C7L	0.67997	0.611	0.77	gapA	Glyceraldehyde-3-phosphate dehydrogenase A (GAPDH-A) (EC 1.2.1.12) (NAD-dependent glyceraldehyde-3-phosphate dehydrogenase)	GAPDHS	glyceraldehyde-3-phosphate dehydrogenase, spermatogenic
4GEC	4CIA	0.607945	0.142	0.269	menH	2-succinyl-6-hydroxy-2,4-cyclohexadiene-1-carboxylate synthase (SHCHC synthase) (EC 4.2.99.20)	CTSA	cathepsin A
6KZX	3INW	0.662395	0.15	0.336	gyrB	DNA gyrase subunit B (EC 5.6.2.2) (Type IIA topoisomerase subunit GyrB)	HSP90AA1	heat shock protein 90 alpha family class A member 1
5QL5	3RPP	0.60507	0.16	0.32	dsbA	Thiol:disulfide interchange protein DsbA	GSTK1	glutathione S-transferase kappa 1
5QKW	3RPP	0.606085	0.16	0.32	dsbA	Thiol:disulfide interchange protein DsbA	GSTK1	glutathione S-transferase kappa 1
2V5A	2P0A	0.615825	0.147	0.275	accC	Biotin carboxylase (EC 6.3.4.14) (Acetyl-coenzyme A carboxylase biotin carboxylase subunit A)	SYN3	synapsin III
5DMM	3GVV	0.612905	0.175	0.271	mmuM	Homocysteine S-methyltransferase (EC 2.1.1.10) (S-methylmethionine:homocysteine methyltransferase)	UROD	uroporphyrinogen decarboxylase
6XSQ	1YZX	0.60266	0.155	0.309	dsbA	Thiol:disulfide interchange protein DsbA	GSTK1	glutathione S-transferase kappa 1
2LIV	5CNJ	0.65988	0.172	0.312	livJ	Leu/Ile/Val-binding protein (LIV-BP)	GRM2	glutamate metabotropic receptor 2
6PBI	3RPP	0.60437	0.16	0.32	dsbA	Thiol:disulfide interchange protein DsbA	GSTK1	glutathione S-transferase kappa 1
1YXC	3IWP	0.618515	0.18	0.328	dapA	4-hydroxy-tetrahydrodipicolinate synthase (HTPA synthase) (EC 4.3.3.7)	CUTC	cutC copper transporter
1D8A	1EK5	0.625205	0.144	0.314	fabI	Enoyl-[acyl-carrier-protein] reductase [NADH] FabI (ENR) (EC 1.3.1.9) (NADH-dependent enoyl-ACP reductase)	GALE	UDP-galactose-4-epimerase
2FWM	6OPL	0.6669	0.186	0.321	entA	2,3-dihydro-2,3-dihydroxybenzoate dehydrogenase (DiDHB-DH) (EC 1.3.1.28) (Trans-2,3-dihydro-2,3-dihydroxybenzoate dehydrogenase)	BLVRB	biliverdin reductase B
1ZZY	2GGT	0.60217	0.158	0.279	trxA	Thioredoxin 1 (Trx-1)	SCO1	synthesis of cytochrome C oxidase 1
4C5B	5BYB	0.66409	0.172	0.331	ddlB	D-alanine--D-alanine ligase B (EC 6.3.2.4) (D-Ala-D-Ala ligase B) (D-alanylalanine synthetase B)	PPIP5K2	diphosphoinositol pentakisphosphate kinase 2
8E9J	4WLJ	0.78609	0.178	0.305	aspC	Aspartate aminotransferase (AspAT) (EC 2.6.1.1) (Transaminase A)	KYAT1	kynurenine aminotransferase 1
1QIR	1W7L	0.78496	0.172	0.294	aspC	Aspartate aminotransferase (AspAT) (EC 2.6.1.1) (Transaminase A)	KYAT1	kynurenine aminotransferase 1
5Z6M	1MVT	0.79942	0.271	0.468	folA	Dihydrofolate reductase (EC 1.5.1.3)	DHFR	dihydrofolate reductase
3T4H	3BTX	0.74443	0.225	0.351	alkB	Alpha-ketoglutarate-dependent dioxygenase AlkB (EC 1.14.11.33) (Alkylated DNA repair protein AlkB) (DNA oxidative demethylase AlkB)	ALKBH2	alkB homolog 2, alpha-ketoglutarate dependent dioxygenase
3VA3	6RCL	0.71596	0.125	0.312	rnt	Ribonuclease T (EC 3.1.13.-) (Exoribonuclease T) (RNase T)	REXO2	RNA exonuclease 2
6MBN	3NHB	0.76016	0.225	0.408	lptB	Lipopolysaccharide export system ATP-binding protein LptB (EC 7.5.2.-)	ABCB6	ATP binding cassette subfamily B member 6 (Langereis blood group)
1J54	6N6I	0.71574	0.178	0.325	dnaQ	DNA polymerase III subunit epsilon (EC 2.7.7.7)	REXO2	RNA exonuclease 2
5GI4	2P6N	0.75004	0.242	0.374	deaD	ATP-dependent RNA helicase DeaD (EC 3.6.4.13) (Cold-shock DEAD box protein A) (Translation factor W2)	DDX41	DEAD-box helicase 41
1FXS	3DXF	0.701505	0.226	0.35	fcl	GDP-L-fucose synthase (EC 1.1.1.271) (GDP-4-keto-6-deoxy-D-mannose-3,5-epimerase-4-reductase)	NMRAL1	NmrA like redox sensor 1
1GES	4FDC	0.71613	0.215	0.373	gor	Glutathione reductase (GR) (GRase) (EC 1.8.1.7)	AIFM1	apoptosis inducing factor mitochondria associated 1
1A16	5UMT	0.73595	0.188	0.365	pepP	Xaa-Pro aminopeptidase (EC 3.4.11.9) (Aminoacylproline aminopeptidase) (Aminopeptidase P II) (APP-II) (X-Pro aminopeptidase)	SUPT16H	SPT16 homolog, facilitates chromatin remodeling subunit
1EF9	2VX2	0.761535	0.285	0.493	scpB	Methylmalonyl-CoA decarboxylase (MMCD) (EC 4.1.1.-) (Transcarboxylase)	ECHDC3	enoyl-CoA hydratase domain containing 3
1WAU	3OVP	0.709655	0.17	0.313	eda	KHG/KDPG aldolase [Includes: 4-hydroxy-2-oxoglutarate aldolase (EC 4.1.3.16) (2-keto-4-hydroxyglutarate aldolase) (KHG-aldolase); 2-dehydro-3-deoxy-phosphogluconate aldolase (EC 4.1.2.14) (2-keto-3-deoxy-6-phosphogluconate aldolase) (KDPG-aldolase) (Phospho-2-dehydro-3-deoxygluconate aldolase) (Phospho-2-keto-3-deoxygluconate aldolase)]	RPE	ribulose-5-phosphate-3-epimerase
2D3W	4C3Z	0.71463	0.218	0.379	sufC	Probable ATP-dependent transporter SufC	ABCC1	ATP binding cassette subfamily C member 1
6COM	1NHX	0.704655	0.177	0.334	pckA	Phosphoenolpyruvate carboxykinase (ATP) (PCK) (PEP carboxykinase) (PEPCK) (EC 4.1.1.49)	PCK1	phosphoenolpyruvate carboxykinase 1
1KHN	1EW2	0.785185	0.266	0.421	phoA	Alkaline phosphatase (APase) (EC 3.1.3.1)	ALPP	alkaline phosphatase, placental
7UXG	2VIO	0.74492	0.232	0.351	ydgD	Uncharacterized serine protease YdgD (EC 3.4.21.-)	PLAU	plasminogen activator, urokinase
1KQ7	4FLC	0.75445	0.171	0.333	fumC	Fumarate hydratase class II (Fumarase C) (EC 4.2.1.2) (Aerobic fumarase) (Iron-independent fumarase)	ADSL	adenylosuccinate lyase
3KHC	2IUW	0.72342	0.202	0.341	alkB	Alpha-ketoglutarate-dependent dioxygenase AlkB (EC 1.14.11.33) (Alkylated DNA repair protein AlkB) (DNA oxidative demethylase AlkB)	ALKBH3	alkB homolog 3, alpha-ketoglutarate dependent dioxygenase
1XBY	3OVR	0.7949	0.138	0.316	ulaD	3-keto-L-gulonate-6-phosphate decarboxylase UlaD (EC 4.1.1.85) (3-dehydro-L-gulonate-6-phosphate decarboxylase) (KGPDC) (L-ascorbate utilization protein D)	RPE	ribulose-5-phosphate-3-epimerase
2NLX	4BC5	0.79591	0.227	0.385	xylB	Xylulose kinase (XK) (Xylulokinase) (EC 2.7.1.17) (1-deoxy-D-xylulokinase) (EC 2.7.1.-)	XYLB	xylulokinase
4NIG	3RZG	0.72595	0.236	0.373	alkB	Alpha-ketoglutarate-dependent dioxygenase AlkB (EC 1.14.11.33) (Alkylated DNA repair protein AlkB) (DNA oxidative demethylase AlkB)	ALKBH2	alkB homolog 2, alpha-ketoglutarate dependent dioxygenase
3C1G	3HD6	0.76866	0.207	0.38	amtB	Ammonium transporter AmtB (Ammonia channel AmtB) (Ammonium channel AmtB)	RHCG	Rh family C glycoprotein
1ARI	4GE4	0.70964	0.192	0.348	aspC	Aspartate aminotransferase (AspAT) (EC 2.6.1.1) (Transaminase A)	AADAT	aminoadipate aminotransferase
1RP7	3OOY	0.78816	0.196	0.33	aceE	Pyruvate dehydrogenase E1 component (PDH E1 component) (EC 1.2.4.1)	TKT	transketolase
7Z2T	4JOD	0.700495	0.195	0.343	appA	Phytase AppA (EC 3.1.3.-) (6-phytase) (Histidine acid phosphatase phytase) (HAP phytase) (Myo-inositol hexakisphosphate phosphohydrolase) (Phosphoanhydride phosphatase) (EC 3.6.1.-) (pH 2.5 acid phosphatase) (Acid phosphatase) (EC 3.1.3.-)	ACP6	acid phosphatase 6, lysophosphatidic
3AA3	2QK9	0.780315	0.331	0.436	rnhA	Ribonuclease HI (RNase HI) (EC 3.1.26.4) (Ribonuclease H) (RNase H)	RNASEH1	ribonuclease H1
3E2C	6M54	0.7993	0.203	0.378	bfr	Bacterioferritin (BFR) (EC 1.16.3.1) (Cytochrome b-1) (Cytochrome b-557)	FTH1	ferritin heavy chain 1
1AQ2	1NHX	0.70195	0.176	0.324	pckA	Phosphoenolpyruvate carboxykinase (ATP) (PCK) (PEP carboxykinase) (PEPCK) (EC 4.1.1.49)	PCK1	phosphoenolpyruvate carboxykinase 1
2Z24	4C6C	0.79842	0.207	0.338	pyrC	Dihydroorotase (DHOase) (EC 3.5.2.3)	CAD	carbamoyl-phosphate synthetase 2, aspartate transcarbamylase, and dihydroorotase
1ZZY	4NWY	0.710025	0.163	0.341	trxA	Thioredoxin 1 (Trx-1)	PDILT	protein disulfide isomerase like, testis expressed
1RQI	1YQ7	0.78607	0.216	0.376	ispA	Farnesyl diphosphate synthase (FPP synthase) (EC 2.5.1.10) ((2E,6E)-farnesyl diphosphate synthase) (Geranyltranstransferase)	FDPS	farnesyl diphosphate synthase
1ASG	2R2N	0.71104	0.202	0.351	aspC	Aspartate aminotransferase (AspAT) (EC 2.6.1.1) (Transaminase A)	AADAT	aminoadipate aminotransferase
3UQE	3NC9	0.79849	0.209	0.381	pfkB	ATP-dependent 6-phosphofructokinase isozyme 2 (ATP-PFK 2) (Phosphofructokinase 2) (EC 2.7.1.11) (6-phosphofructokinase isozyme II) (Phosphohexokinase 2)	KHK	ketohexokinase
8E9V	3DC1	0.712175	0.163	0.339	aspC	Aspartate aminotransferase (AspAT) (EC 2.6.1.1) (Transaminase A)	AADAT	aminoadipate aminotransferase
1BS0	2OAT	0.783365	0.171	0.34	bioF	8-amino-7-oxononanoate synthase (AONS) (EC 2.3.1.47) (7-keto-8-amino-pelargonic acid synthase) (7-KAP synthase) (KAPA synthase) (8-amino-7-ketopelargonate synthase)	OAT	ornithine aminotransferase
8ICD	6B0Z	0.720755	0.195	0.361	icd	Isocitrate dehydrogenase [NADP] (IDH) (EC 1.1.1.42) (IDP) (NADP(+)-specific ICDH) (Oxalosuccinate decarboxylase)	IDH1	isocitrate dehydrogenase (NADP(+)) 1
6FPK	1GU5	0.746225	0.149	0.328	ftsY	Signal recognition particle receptor FtsY (SRP receptor)	CEBPB	CCAAT enhancer binding protein beta
1OU4	1SD2	0.738945	0.181	0.366	deoD	Purine nucleoside phosphorylase DeoD-type (PNP) (EC 2.4.2.1)	MTAP	methylthioadenosine phosphorylase
5JBN	1KKU	0.7022	0.171	0.364	coaD	Phosphopantetheine adenylyltransferase (EC 2.7.7.3) (Dephospho-CoA pyrophosphorylase) (Pantetheine-phosphate adenylyltransferase) (PPAT)	NMNAT1	nicotinamide nucleotide adenylyltransferase 1
4GDM	2OCI	0.73994	0.205	0.374	menH	2-succinyl-6-hydroxy-2,4-cyclohexadiene-1-carboxylate synthase (SHCHC synthase) (EC 4.2.99.20)	BPHL	biphenyl hydrolase like
3C17	4OSY	0.712645	0.366	0.506	iaaA	Isoaspartyl peptidase (EC 3.4.19.5) (Beta-aspartyl-peptidase) (EcAIII) (Isoaspartyl dipeptidase) [Cleaved into: Isoaspartyl peptidase subunit alpha; Isoaspartyl peptidase subunit beta]	ASRGL1	asparaginase and isoaspartyl peptidase 1
2O5E	5GVC	0.79161	0.219	0.393	topB	DNA topoisomerase 3 (EC 5.6.2.1) (DNA topoisomerase III)	TOP3B	DNA topoisomerase III beta
1EVL	7F9A	0.705435	0.181	0.33	thrS	Threonine--tRNA ligase (EC 6.1.1.3) (Threonyl-tRNA synthetase) (ThrRS)	EPRS1	glutamyl-prolyl-tRNA synthetase 1
1MOS	6SVO	0.717805	0.239	0.349	glmS	Glutamine--fructose-6-phosphate aminotransferase [isomerizing] (EC 2.6.1.16) (D-fructose-6-phosphate amidotransferase) (GFAT) (Glucosamine-6-phosphate synthase) (Hexosephosphate aminotransferase) (L-glutamine--D-fructose-6-phosphate amidotransferase)	GFPT1	glutamine--fructose-6-phosphate transaminase 1
1KVA	2QK9	0.78398	0.331	0.436	rnhA	Ribonuclease HI (RNase HI) (EC 3.1.26.4) (Ribonuclease H) (RNase H)	RNASEH1	ribonuclease H1
2P99	1YW9	0.71936	0.158	0.313	map	Methionine aminopeptidase (MAP) (MetAP) (EC 3.4.11.18) (Peptidase M)	METAP2	methionyl aminopeptidase 2
1OTY	1K27	0.732285	0.175	0.339	deoD	Purine nucleoside phosphorylase DeoD-type (PNP) (EC 2.4.2.1)	MTAP	methylthioadenosine phosphorylase
7DQU	7QFN	0.715555	0.15	0.255	gyrB	DNA gyrase subunit B (EC 5.6.2.2) (Type IIA topoisomerase subunit GyrB)	TOP2B	DNA topoisomerase II beta
6ZTX	7P8W	0.7997	0.306	0.425	katE	Catalase HPII (EC 1.11.1.6) (Hydroxyperoxidase II)	CAT	catalase
1RXC	5TC6	0.712415	0.192	0.335	udp	Uridine phosphorylase (UPase) (UrdPase) (EC 2.4.2.3)	MTAP	methylthioadenosine phosphorylase
1UDA	2WMD	0.720075	0.179	0.338	galE	UDP-glucose 4-epimerase (EC 5.1.3.2) (Galactowaldenase) (UDP-galactose 4-epimerase)	NMRAL1	NmrA like redox sensor 1
2O59	5GVC	0.776285	0.216	0.398	topB	DNA topoisomerase 3 (EC 5.6.2.1) (DNA topoisomerase III)	TOP3B	DNA topoisomerase III beta
2G25	4KXX	0.789105	0.195	0.327	aceE	Pyruvate dehydrogenase E1 component (PDH E1 component) (EC 1.2.4.1)	TKT	transketolase
6YPV	3RZJ	0.74293	0.213	0.365	alkB	Alpha-ketoglutarate-dependent dioxygenase AlkB (EC 1.14.11.33) (Alkylated DNA repair protein AlkB) (DNA oxidative demethylase AlkB)	ALKBH2	alkB homolog 2, alpha-ketoglutarate dependent dioxygenase
8E9V	5TF5	0.706445	0.167	0.333	aspC	Aspartate aminotransferase (AspAT) (EC 2.6.1.1) (Transaminase A)	AADAT	aminoadipate aminotransferase
1B4X	4GEB	0.701375	0.19	0.345	aspC	Aspartate aminotransferase (AspAT) (EC 2.6.1.1) (Transaminase A)	AADAT	aminoadipate aminotransferase
4HWR	7OSY	0.703555	0.191	0.348	thrS	Threonine--tRNA ligase (EC 6.1.1.3) (Threonyl-tRNA synthetase) (ThrRS)	EPRS1	glutamyl-prolyl-tRNA synthetase 1
6O13	5QQS	0.733055	0.19	0.347	sufS	Cysteine desulfurase (EC 2.8.1.7) (Cysteine sulfinate desulfinase) (CSD) (EC 3.13.1.-) (Selenocysteine beta-lyase) (SCL) (Selenocysteine lyase) (EC 4.4.1.16) (Selenocysteine reductase)	ALAS2	5'-aminolevulinate synthase 2
1WSF	2QK9	0.769755	0.325	0.429	rnhA	Ribonuclease HI (RNase HI) (EC 3.1.26.4) (Ribonuclease H) (RNase H)	RNASEH1	ribonuclease H1
1XBX	3EWY	0.700165	0.174	0.333	ulaD	3-keto-L-gulonate-6-phosphate decarboxylase UlaD (EC 4.1.1.85) (3-dehydro-L-gulonate-6-phosphate decarboxylase) (KGPDC) (L-ascorbate utilization protein D)	UMPS	uridine monophosphate synthetase
1DFO	5QQX	0.70041	0.184	0.378	glyA	Serine hydroxymethyltransferase (SHMT) (Serine methylase) (EC 2.1.2.1)	ALAS2	5'-aminolevulinate synthase 2
1T4B	6YNE	0.712285	0.162	0.332	asd	Aspartate-semialdehyde dehydrogenase (ASA dehydrogenase) (ASADH) (EC 1.2.1.11) (Aspartate-beta-semialdehyde dehydrogenase)	GAPDH	glyceraldehyde-3-phosphate dehydrogenase
1AG9	4H2D	0.767465	0.158	0.372	fldA	Flavodoxin 1 (Flavodoxin A)	NDOR1	NADPH dependent diflavin oxidoreductase 1
5CG2	1W6U	0.711025	0.236	0.399	fabI	Enoyl-[acyl-carrier-protein] reductase [NADH] FabI (ENR) (EC 1.3.1.9) (NADH-dependent enoyl-ACP reductase)	DECR1	2,4-dienoyl-CoA reductase 1
2BWY	5UMT	0.73758	0.19	0.362	pepP	Xaa-Pro aminopeptidase (EC 3.4.11.9) (Aminoacylproline aminopeptidase) (Aminopeptidase P II) (APP-II) (X-Pro aminopeptidase)	SUPT16H	SPT16 homolog, facilitates chromatin remodeling subunit
1M5W	3OVQ	0.73737	0.138	0.295	pdxJ	Pyridoxine 5'-phosphate synthase (PNP synthase) (EC 2.6.99.2)	RPE	ribulose-5-phosphate-3-epimerase
1CW4	5L57	0.71731	0.186	0.356	icd	Isocitrate dehydrogenase [NADP] (IDH) (EC 1.1.1.42) (IDP) (NADP(+)-specific ICDH) (Oxalosuccinate decarboxylase)	IDH1	isocitrate dehydrogenase (NADP(+)) 1
3A6T	7B65	0.790485	0.231	0.365	mutT	8-oxo-dGTP diphosphatase (8-oxo-dGTPase) (EC 3.6.1.55) (7,8-dihydro-8-oxoguanine-triphosphatase) (Mutator protein MutT) (dGTP pyrophosphohydrolase)	NUDT15	nudix hydrolase 15
3N2X	3S5N	0.721925	0.267	0.409	yagE	Putative 2-dehydro-3-deoxy-D-gluconate aldolase YagE (KDG aldolase YagE) (EC 4.1.2.51) (Putative 2-dehydro-3-deoxy-D-pentonate aldolase YagE) (EC 4.1.2.28)	HOGA1	4-hydroxy-2-oxoglutarate aldolase 1
1GT7	4M6R	0.71537	0.158	0.32	rhaD	Rhamnulose-1-phosphate aldolase (EC 4.1.2.19)	APIP	APAF1 interacting protein
1T8Z	5K7B	0.724705	0.136	0.216	lpp	Major outer membrane lipoprotein Lpp (Braun lipoprotein) (BLP) (Murein-lipoprotein)	BECN2	beclin 2
1D6U	4BTW	0.79297	0.218	0.359	tynA	Primary amine oxidase (EC 1.4.3.21) (2-phenylethylamine oxidase) (Copper amine oxidase) (Tyramine oxidase)	AOC3	amine oxidase copper containing 3
7LVC	3EIG	0.79869	0.282	0.473	folA	Dihydrofolate reductase (EC 1.5.1.3)	DHFR	dihydrofolate reductase
2H75	4CDO	0.73774	0.131	0.327	trxA	Thioredoxin 1 (Trx-1)	TXNL4A	thioredoxin like 4A
7VSD	2QK9	0.7743	0.337	0.442	rnhA	Ribonuclease HI (RNase HI) (EC 3.1.26.4) (Ribonuclease H) (RNase H)	RNASEH1	ribonuclease H1
5T4L	5EFS	0.701635	0.2	0.348	aspC	Aspartate aminotransferase (AspAT) (EC 2.6.1.1) (Transaminase A)	AADAT	aminoadipate aminotransferase
1IOW	2P0A	0.72246	0.2	0.342	ddlB	D-alanine--D-alanine ligase B (EC 6.3.2.4) (D-Ala-D-Ala ligase B) (D-alanylalanine synthetase B)	SYN3	synapsin III
1BF6	2Y1H	0.732115	0.174	0.355	php	Phosphotriesterase homology protein (EC 3.1.-.-)	TATDN3	TatD DNase domain containing 3
1KHJ	3MK0	0.78458	0.265	0.411	phoA	Alkaline phosphatase (APase) (EC 3.1.3.1)	ALPP	alkaline phosphatase, placental
2PTQ	5UPP	0.71286	0.19	0.364	purB	Adenylosuccinate lyase (ASL) (EC 4.3.2.2) (Adenylosuccinase) (ASase)	FH	fumarate hydratase
3B2P	5NIE	0.702155	0.175	0.297	pepN	Aminopeptidase N (EC 3.4.11.2) (Alpha-aminoacylpeptide hydrolase)	LTA4H	leukotriene A4 hydrolase
2QTA	4KXW	0.78728	0.198	0.335	aceE	Pyruvate dehydrogenase E1 component (PDH E1 component) (EC 1.2.4.1)	TKT	transketolase
2EL9	4G84	0.79449	0.204	0.379	hisS	Histidine--tRNA ligase (EC 6.1.1.21) (Histidyl-tRNA synthetase) (HisRS)	HARS1	histidyl-tRNA synthetase 1
2CMD	2I6T	0.75454	0.213	0.368	mdh	Malate dehydrogenase (EC 1.1.1.37)	UEVLD	UEV and lactate/malate dehyrogenase domains
1X84	2DHO	0.78637	0.264	0.403	idi	Isopentenyl-diphosphate Delta-isomerase (IPP isomerase) (EC 5.3.3.2) (IPP:DMAPP isomerase) (Isopentenyl pyrophosphate isomerase)	IDI1	isopentenyl-diphosphate delta isomerase 1
1IDT	4TTB	0.710645	0.174	0.317	nfsB	Oxygen-insensitive NAD(P)H nitroreductase (EC 1.-.-.-) (Dihydropteridine reductase) (EC 1.5.1.34) (FMN-dependent nitroreductase)	IYD	iodotyrosine deiodinase
2GU6	7A15	0.71245	0.171	0.333	map	Methionine aminopeptidase (MAP) (MetAP) (EC 3.4.11.18) (Peptidase M)	METAP2	methionyl aminopeptidase 2
1IL2	5XIX	0.730405	0.198	0.343	aspS	Aspartate--tRNA ligase (EC 6.1.1.12) (Aspartyl-tRNA synthetase) (AspRS)	NARS1	asparaginyl-tRNA synthetase 1
5HBQ	3TG3	0.700325	0.202	0.357	ygaP	Inner membrane protein YgaP	DUSP16	dual specificity phosphatase 16
2G2Y	2JFK	0.76715	0.184	0.32	fabD	Malonyl CoA-acyl carrier protein transacylase (MCT) (EC 2.3.1.39)	FASN	fatty acid synthase
1OO6	4TTB	0.712795	0.174	0.317	nfsB	Oxygen-insensitive NAD(P)H nitroreductase (EC 1.-.-.-) (Dihydropteridine reductase) (EC 1.5.1.34) (FMN-dependent nitroreductase)	IYD	iodotyrosine deiodinase
1AIB	2VGZ	0.71291	0.196	0.347	aspC	Aspartate aminotransferase (AspAT) (EC 2.6.1.1) (Transaminase A)	AADAT	aminoadipate aminotransferase
3O1V	3H8R	0.74359	0.224	0.345	alkB	Alpha-ketoglutarate-dependent dioxygenase AlkB (EC 1.14.11.33) (Alkylated DNA repair protein AlkB) (DNA oxidative demethylase AlkB)	ALKBH2	alkB homolog 2, alpha-ketoglutarate dependent dioxygenase
1QAF	3K5T	0.790635	0.221	0.375	tynA	Primary amine oxidase (EC 1.4.3.21) (2-phenylethylamine oxidase) (Copper amine oxidase) (Tyramine oxidase)	AOC1	amine oxidase copper containing 1
2FDF	3S57	0.730465	0.23	0.356	alkB	Alpha-ketoglutarate-dependent dioxygenase AlkB (EC 1.14.11.33) (Alkylated DNA repair protein AlkB) (DNA oxidative demethylase AlkB)	ALKBH2	alkB homolog 2, alpha-ketoglutarate dependent dioxygenase
3F1L	1A27	0.77366	0.199	0.32	yciK	Uncharacterized oxidoreductase YciK (EC 1.-.-.-)	HSD17B1	hydroxysteroid 17-beta dehydrogenase 1
1CQ8	2QLR	0.708285	0.18	0.344	aspC	Aspartate aminotransferase (AspAT) (EC 2.6.1.1) (Transaminase A)	AADAT	aminoadipate aminotransferase
1OO5	5YAK	0.70007	0.173	0.329	nfsB	Oxygen-insensitive NAD(P)H nitroreductase (EC 1.-.-.-) (Dihydropteridine reductase) (EC 1.5.1.34) (FMN-dependent nitroreductase)	IYD	iodotyrosine deiodinase
3O1P	3S5A	0.731025	0.24	0.382	alkB	Alpha-ketoglutarate-dependent dioxygenase AlkB (EC 1.14.11.33) (Alkylated DNA repair protein AlkB) (DNA oxidative demethylase AlkB)	ALKBH2	alkB homolog 2, alpha-ketoglutarate dependent dioxygenase
1GGE	1DGB	0.803775	0.309	0.426	katE	Catalase HPII (EC 1.11.1.6) (Hydroxyperoxidase II)	CAT	catalase
7Q31	3P0E	0.80517	0.277	0.391	udp	Uridine phosphorylase (UPase) (UrdPase) (EC 2.4.2.3)	UPP2	uridine phosphorylase 2
4GC0	6THA	0.80239	0.28	0.483	xylE	D-xylose-proton symporter (D-xylose transporter)	SLC2A1	solute carrier family 2 member 1
7D6G	3F8Y	0.83177	0.287	0.473	folA	Dihydrofolate reductase (EC 1.5.1.3)	DHFR	dihydrofolate reductase
1U1G	3P0E	0.80127	0.27	0.384	udp	Uridine phosphorylase (UPase) (UrdPase) (EC 2.4.2.3)	UPP2	uridine phosphorylase 2
6CDZ	4KPW	0.877045	0.5	0.649	thyA	Thymidylate synthase (TS) (TSase) (EC 2.1.1.45)	TYMS	thymidylate synthetase
1XSK	3L4Z	0.835675	0.208	0.358	yicI	Alpha-xylosidase (EC 3.2.1.177)	MGAM	maltase-glucoamylase
1OG6	1ZSX	0.837235	0.213	0.369	ydhF	Oxidoreductase YdhF (EC 1.-.-.-)	KCNAB2	potassium voltage-gated channel subfamily A regulatory beta subunit 2
1YVM	4FLJ	0.87511	0.395	0.54	map	Methionine aminopeptidase (MAP) (MetAP) (EC 3.4.11.18) (Peptidase M)	METAP1	methionyl aminopeptidase 1
3K5L	4Q5V	0.81549	0.22	0.386	polB	DNA polymerase II (Pol II) (EC 2.7.7.7)	POLA1	DNA polymerase alpha 1, catalytic subunit
1UDA	4E5Y	0.825355	0.175	0.382	galE	UDP-glucose 4-epimerase (EC 5.1.3.2) (Galactowaldenase) (UDP-galactose 4-epimerase)	GFUS	GDP-L-fucose synthase
1A3G	5I5V	0.81829	0.241	0.389	ilvE	Branched-chain-amino-acid aminotransferase (BCAT) (EC 2.6.1.42) (Transaminase B)	BCAT2	branched chain amino acid transaminase 2
5VM2	2FZW	0.83174	0.255	0.404	ydjJ	Uncharacterized zinc-type alcohol dehydrogenase-like protein YdjJ (EC 1.-.-.-)	ADH5	alcohol dehydrogenase 5 (class III), chi polypeptide
1LDF	7STC	0.816825	0.297	0.423	glpF	Glycerol uptake facilitator protein (Aquaglyceroporin) (Glycerol facilitator)	AQP5	aquaporin 5
3BGX	4E28	0.874615	0.509	0.669	thyA	Thymidylate synthase (TS) (TSase) (EC 2.1.1.45)	TYMS	thymidylate synthetase
3LCX	3S5N	0.896885	0.247	0.42	nanA	N-acetylneuraminate lyase (NAL) (Neu5Ac lyase) (EC 4.1.3.3) (N-acetylneuraminate pyruvate-lyase) (N-acetylneuraminic acid aldolase) (NALase) (Sialate lyase) (Sialic acid aldolase) (Sialic acid lyase)	HOGA1	4-hydroxy-2-oxoglutarate aldolase 1
6B89	6BZR	0.824465	0.237	0.466	lptB	Lipopolysaccharide export system ATP-binding protein LptB (EC 7.5.2.-)	ABCC6	ATP binding cassette subfamily C member 6
6SPQ	5GL7	0.85601	0.259	0.445	metG	Methionine--tRNA ligase (EC 6.1.1.10) (Methionyl-tRNA synthetase) (MetRS)	MARS1	methionyl-tRNA synthetase 1
6XG5	5SDB	0.836135	0.282	0.473	folA	Dihydrofolate reductase (EC 1.5.1.3)	DHFR	dihydrofolate reductase
1KVQ	5IN5	0.817635	0.23	0.419	galE	UDP-glucose 4-epimerase (EC 5.1.3.2) (Galactowaldenase) (UDP-galactose 4-epimerase)	GMDS	GDP-mannose 4,6-dehydratase
3PJD	1WNT	0.86086	0.271	0.457	fabI	Enoyl-[acyl-carrier-protein] reductase [NADH] FabI (ENR) (EC 1.3.1.9) (NADH-dependent enoyl-ACP reductase)	DCXR	dicarbonyl and L-xylulose reductase
2P99	4IKS	0.87949	0.396	0.542	map	Methionine aminopeptidase (MAP) (MetAP) (EC 3.4.11.18) (Peptidase M)	METAP1	methionyl aminopeptidase 1
3B9H	4O1U	0.879285	0.496	0.641	thyA	Thymidylate synthase (TS) (TSase) (EC 2.1.1.45)	TYMS	thymidylate synthetase
3H99	5GOY	0.84979	0.257	0.442	metG	Methionine--tRNA ligase (EC 6.1.1.10) (Methionyl-tRNA synthetase) (MetRS)	MARS1	methionyl-tRNA synthetase 1
1FTS	6Y2Z	0.803115	0.29	0.481	ftsY	Signal recognition particle receptor FtsY (SRP receptor)	SRP54	signal recognition particle 54
4IR1	4EBD	0.80551	0.285	0.447	dinB	DNA polymerase IV (Pol IV) (EC 2.7.7.7) (Translesion synthesis polymerase IV) (TSL polymerase IV)	POLI	DNA polymerase iota
5Z6J	5HSR	0.81268	0.271	0.468	folA	Dihydrofolate reductase (EC 1.5.1.3)	DHFR	dihydrofolate reductase
1ZLZ	1VAR	0.87807	0.436	0.583	sodA	Superoxide dismutase [Mn] (EC 1.15.1.1) (MnSOD)	SOD2	superoxide dismutase 2
3HPR	6ZJB	0.895565	0.383	0.586	adk	Adenylate kinase (AK) (EC 2.7.4.3) (ATP-AMP transphosphorylase) (ATP:AMP phosphotransferase) (Adenylate monophosphate kinase)	AK3	adenylate kinase 3
1OTP	2J0F	0.82581	0.389	0.547	deoA	Thymidine phosphorylase (EC 2.4.2.4) (TdRPase)	TYMP	thymidine phosphorylase
3QYO	1S3W	0.835145	0.282	0.473	folA	Dihydrofolate reductase (EC 1.5.1.3)	DHFR	dihydrofolate reductase
1QIS	3DYD	0.807775	0.154	0.308	aspC	Aspartate aminotransferase (AspAT) (EC 2.6.1.1) (Transaminase A)	TAT	tyrosine aminotransferase
3PQ4	1F4J	0.804745	0.306	0.418	katE	Catalase HPII (EC 1.11.1.6) (Hydroxyperoxidase II)	CAT	catalase
3CTL	3OVP	0.87802	0.352	0.537	alsE	D-allulose-6-phosphate 3-epimerase (EC 5.1.3.-)	RPE	ribulose-5-phosphate-3-epimerase
3E1P	2IU2	0.837245	0.208	0.382	bfr	Bacterioferritin (BFR) (EC 1.16.3.1) (Cytochrome b-1) (Cytochrome b-557)	FTH1	ferritin heavy chain 1
1IX8	3DYD	0.8101	0.163	0.318	aspC	Aspartate aminotransferase (AspAT) (EC 2.6.1.1) (Transaminase A)	TAT	tyrosine aminotransferase
1BQ1	1YPV	0.8764	0.493	0.637	thyA	Thymidylate synthase (TS) (TSase) (EC 2.1.1.45)	TYMS	thymidylate synthetase
3NPM	1EP9	0.8701	0.249	0.426	pyrB	Aspartate carbamoyltransferase catalytic subunit (EC 2.1.3.2) (Aspartate transcarbamylase) (ATCase)	OTC	ornithine transcarbamylase
2BHS	6ZUJ	0.80335	0.186	0.375	cysM	Cysteine synthase B (CSase B) (EC 2.5.1.47) (O-acetylserine (thiol)-lyase B) (OAS-TL B) (O-acetylserine sulfhydrylase B)	SRR	serine racemase
4XO3	4JBS	0.818465	0.206	0.369	pepN	Aminopeptidase N (EC 3.4.11.2) (Alpha-aminoacylpeptide hydrolase)	ERAP2	endoplasmic reticulum aminopeptidase 2
1FDY	3S5N	0.891545	0.252	0.425	nanA	N-acetylneuraminate lyase (NAL) (Neu5Ac lyase) (EC 4.1.3.3) (N-acetylneuraminate pyruvate-lyase) (N-acetylneuraminic acid aldolase) (NALase) (Sialate lyase) (Sialic acid aldolase) (Sialic acid lyase)	HOGA1	4-hydroxy-2-oxoglutarate aldolase 1
5YQ1	4FYQ	0.811145	0.187	0.354	pepN	Aminopeptidase N (EC 3.4.11.2) (Alpha-aminoacylpeptide hydrolase)	ANPEP	alanyl aminopeptidase, membrane
2IGL	4HJU	0.87546	0.295	0.393	hiuH	5-hydroxyisourate hydrolase (HIU hydrolase) (HIUHase) (EC 3.5.2.17) (Transthyretin-like protein) (TLP) (Transthyretin-related protein) (TRP)	TTR	transthyretin
3KFY	2W3B	0.83266	0.283	0.476	folA	Dihydrofolate reductase (EC 1.5.1.3)	DHFR	dihydrofolate reductase
1E0U	4QGC	0.84015	0.457	0.596	pykF	Pyruvate kinase I (EC 2.7.1.40) (PK-1)	PKM	pyruvate kinase M1/2
1DTY	2BYL	0.877915	0.274	0.46	bioA	Adenosylmethionine-8-amino-7-oxononanoate aminotransferase (EC 2.6.1.62) (7,8-diamino-pelargonic acid aminotransferase) (DAPA AT) (DAPA aminotransferase) (7,8-diaminononanoate synthase) (DANS) (Diaminopelargonic acid synthase)	OAT	ornithine aminotransferase
1RXS	3P0E	0.807235	0.277	0.391	udp	Uridine phosphorylase (UPase) (UrdPase) (EC 2.4.2.3)	UPP2	uridine phosphorylase 2
3LCL	3S5N	0.891805	0.256	0.425	nanA	N-acetylneuraminate lyase (NAL) (Neu5Ac lyase) (EC 4.1.3.3) (N-acetylneuraminate pyruvate-lyase) (N-acetylneuraminic acid aldolase) (NALase) (Sialate lyase) (Sialic acid aldolase) (Sialic acid lyase)	HOGA1	4-hydroxy-2-oxoglutarate aldolase 1
1I08	1JA8	0.87777	0.431	0.578	sodA	Superoxide dismutase [Mn] (EC 1.15.1.1) (MnSOD)	SOD2	superoxide dismutase 2
1KZI	3GH0	0.860355	0.491	0.64	thyA	Thymidylate synthase (TS) (TSase) (EC 2.1.1.45)	TYMS	thymidylate synthetase
1AKM	1FVO	0.893085	0.345	0.507	argI	Ornithine carbamoyltransferase subunit I (OTCase-1) (EC 2.1.3.3)	OTC	ornithine transcarbamylase
2TIR	2WZ9	0.82182	0.246	0.393	trxA	Thioredoxin 1 (Trx-1)	GLRX3	glutaredoxin 3
4PRV	1ZXN	0.802255	0.217	0.401	gyrB	DNA gyrase subunit B (EC 5.6.2.2) (Type IIA topoisomerase subunit GyrB)	TOP2A	DNA topoisomerase II alpha
5YV3	5ULW	0.81009	0.281	0.452	dinB	DNA polymerase IV (Pol IV) (EC 2.7.7.7) (Translesion synthesis polymerase IV) (TSL polymerase IV)	POLI	DNA polymerase iota
3TTV	1DGF	0.80378	0.304	0.425	katE	Catalase HPII (EC 1.11.1.6) (Hydroxyperoxidase II)	CAT	catalase
2Q96	2G6P	0.875295	0.394	0.539	map	Methionine aminopeptidase (MAP) (MetAP) (EC 3.4.11.18) (Peptidase M)	METAP1	methionyl aminopeptidase 1
1PIY	3VPO	0.83086	0.212	0.384	nrdB	Ribonucleoside-diphosphate reductase 1 subunit beta (EC 1.17.4.1) (Protein B2) (Protein R2) (Ribonucleotide reductase 1)	RRM2	ribonucleotide reductase regulatory subunit M2
1DI7	1JLJ	0.80569	0.318	0.484	mog	Molybdopterin adenylyltransferase (MPT adenylyltransferase) (EC 2.7.7.75)	GPHN	gephyrin
4IR9	6BRX	0.819005	0.297	0.449	dinB	DNA polymerase IV (Pol IV) (EC 2.7.7.7) (Translesion synthesis polymerase IV) (TSL polymerase IV)	POLK	DNA polymerase kappa
1QYR	6W6C	0.837105	0.273	0.45	rsmA	Ribosomal RNA small subunit methyltransferase A (EC 2.1.1.182) (16S rRNA (adenine(1518)-N(6)/adenine(1519)-N(6))-dimethyltransferase) (16S rRNA dimethyladenosine transferase) (16S rRNA dimethylase) (High level kasugamycin resistance protein KsgA) (Kasugamycin dimethyltransferase) (S-adenosylmethionine-6-N', N'-adenosyl(rRNA) dimethyltransferase)	DIMT1	DIM1 rRNA methyltransferase and ribosome maturation factor
3TTW	1F4J	0.80521	0.304	0.415	katE	Catalase HPII (EC 1.11.1.6) (Hydroxyperoxidase II)	CAT	catalase
2V59	3GID	0.81229	0.304	0.497	accC	Biotin carboxylase (EC 6.3.4.14) (Acetyl-coenzyme A carboxylase biotin carboxylase subunit A)	ACACB	acetyl-CoA carboxylase beta
1DUP	3EHW	0.81649	0.29	0.477	dut	Deoxyuridine 5'-triphosphate nucleotidohydrolase (dUTPase) (EC 3.6.1.23) (dUTP pyrophosphatase)	DUT	deoxyuridine triphosphatase
1EW4	1EKG	0.82423	0.233	0.425	cyaY	Iron-sulfur cluster assembly protein CyaY (Bacterial frataxin ortholog)	FXN	frataxin
1TOG	3DYD	0.80624	0.164	0.31	aspC	Aspartate aminotransferase (AspAT) (EC 2.6.1.1) (Transaminase A)	TAT	tyrosine aminotransferase
1IX7	3DYD	0.813425	0.154	0.308	aspC	Aspartate aminotransferase (AspAT) (EC 2.6.1.1) (Transaminase A)	TAT	tyrosine aminotransferase
1A3G	5BWV	0.822195	0.238	0.399	ilvE	Branched-chain-amino-acid aminotransferase (BCAT) (EC 2.6.1.42) (Transaminase B)	BCAT2	branched chain amino acid transaminase 2
7ENY	4BB6	0.81125	0.229	0.428	hdhA	7alpha-hydroxysteroid dehydrogenase (7alpha-HSDH) (EC 1.1.1.159) (NAD-dependent 7alpha-hydroxysteroid dehydrogenase)	HSD11B1	hydroxysteroid 11-beta dehydrogenase 1
3HHP	1I10	0.822645	0.241	0.425	mdh	Malate dehydrogenase (EC 1.1.1.37)	LDHA	lactate dehydrogenase A
2O9G	3D9S	0.845575	0.328	0.471	aqpZ	Aquaporin Z (Bacterial nodulin-like intrinsic protein) (Water channel AqpZ)	AQP5	aquaporin 5
2EVO	2GZ5	0.875715	0.392	0.537	map	Methionine aminopeptidase (MAP) (MetAP) (EC 3.4.11.18) (Peptidase M)	METAP1	methionyl aminopeptidase 1
2F2H	3L4V	0.834475	0.208	0.358	yicI	Alpha-xylosidase (EC 3.2.1.177)	MGAM	maltase-glucoamylase
2H75	3KD0	0.87567	0.315	0.486	trxA	Thioredoxin 1 (Trx-1)	TXN	thioredoxin
7Q32	3P0E	0.80419	0.277	0.391	udp	Uridine phosphorylase (UPase) (UrdPase) (EC 2.4.2.3)	UPP2	uridine phosphorylase 2
1MGV	6V8D	0.8839	0.285	0.469	bioA	Adenosylmethionine-8-amino-7-oxononanoate aminotransferase (EC 2.6.1.62) (7,8-diamino-pelargonic acid aminotransferase) (DAPA AT) (DAPA aminotransferase) (7,8-diaminononanoate synthase) (DANS) (Diaminopelargonic acid synthase)	OAT	ornithine aminotransferase
1RN8	1Q5H	0.863165	0.31	0.5	dut	Deoxyuridine 5'-triphosphate nucleotidohydrolase (dUTPase) (EC 3.6.1.23) (dUTP pyrophosphatase)	DUT	deoxyuridine triphosphatase
1SPA	3DYD	0.81345	0.157	0.311	aspC	Aspartate aminotransferase (AspAT) (EC 2.6.1.1) (Transaminase A)	TAT	tyrosine aminotransferase
1RE7	2DHF	0.824715	0.276	0.476	folA	Dihydrofolate reductase (EC 1.5.1.3)	DHFR	dihydrofolate reductase
4KJK	3NZD	0.83486	0.282	0.473	folA	Dihydrofolate reductase (EC 1.5.1.3)	DHFR	dihydrofolate reductase
4A2C	1M6H	0.815395	0.231	0.403	gatD	Galactitol 1-phosphate 5-dehydrogenase (EC 1.1.1.251)	ADH5	alcohol dehydrogenase 5 (class III), chi polypeptide
4XND	4KX7	0.813005	0.204	0.361	pepN	Aminopeptidase N (EC 3.4.11.2) (Alpha-aminoacylpeptide hydrolase)	ENPEP	glutamyl aminopeptidase
1L6Y	1PV8	0.84248	0.34	0.512	hemB	Delta-aminolevulinic acid dehydratase (ALAD) (ALADH) (EC 4.2.1.24) (Porphobilinogen synthase)	ALAD	aminolevulinate dehydratase
6SPP	5GOY	0.851135	0.26	0.447	metG	Methionine--tRNA ligase (EC 6.1.1.10) (Methionyl-tRNA synthetase) (MetRS)	MARS1	methionyl-tRNA synthetase 1
2WPB	3S5O	0.877895	0.248	0.414	nanA	N-acetylneuraminate lyase (NAL) (Neu5Ac lyase) (EC 4.1.3.3) (N-acetylneuraminate pyruvate-lyase) (N-acetylneuraminic acid aldolase) (NALase) (Sialate lyase) (Sialic acid aldolase) (Sialic acid lyase)	HOGA1	4-hydroxy-2-oxoglutarate aldolase 1
2D61	3DYD	0.80851	0.156	0.308	aspC	Aspartate aminotransferase (AspAT) (EC 2.6.1.1) (Transaminase A)	TAT	tyrosine aminotransferase
4LHM	2J0F	0.865845	0.389	0.547	deoA	Thymidine phosphorylase (EC 2.4.2.4) (TdRPase)	TYMP	thymidine phosphorylase
1N2A	1IYH	0.81874	0.165	0.344	gstA	Glutathione S-transferase GstA (EC 2.5.1.18) (GST B1-1)	HPGDS	hematopoietic prostaglandin D synthase
2BHT	3L6B	0.825105	0.195	0.378	cysM	Cysteine synthase B (CSase B) (EC 2.5.1.47) (O-acetylserine (thiol)-lyase B) (OAS-TL B) (O-acetylserine sulfhydrylase B)	SRR	serine racemase
1ZFN	6H78	0.815985	0.22	0.373	thiF	Sulfur carrier protein ThiS adenylyltransferase (EC 2.7.7.73)	UBA5	ubiquitin like modifier activating enzyme 5
1EYG	2DUD	0.81966	0.307	0.561	ssb	Single-stranded DNA-binding protein (SSB) (Helix-destabilizing protein)	SSBP1	single stranded DNA binding protein 1
4NX6	7XI7	0.830535	0.282	0.473	folA	Dihydrofolate reductase (EC 1.5.1.3)	DHFR	dihydrofolate reductase
1XSJ	3CTT	0.835465	0.211	0.357	yicI	Alpha-xylosidase (EC 3.2.1.177)	MGAM	maltase-glucoamylase
3E2C	5VTD	0.825825	0.208	0.382	bfr	Bacterioferritin (BFR) (EC 1.16.3.1) (Cytochrome b-1) (Cytochrome b-557)	FTH1	ferritin heavy chain 1
8E9J	3DYD	0.810495	0.156	0.306	aspC	Aspartate aminotransferase (AspAT) (EC 2.6.1.1) (Transaminase A)	TAT	tyrosine aminotransferase
1KZI	3N5G	0.87755	0.498	0.643	thyA	Thymidylate synthase (TS) (TSase) (EC 2.1.1.45)	TYMS	thymidylate synthetase
6SYM	6QA0	0.879675	0.436	0.604	msrB	Peptide methionine sulfoxide reductase MsrB (EC 1.8.4.12) (Peptide-methionine (R)-S-oxide reductase)	MSRB3	methionine sulfoxide reductase B3
1EKX	1EP9	0.869715	0.247	0.437	pyrB	Aspartate carbamoyltransferase catalytic subunit (EC 2.1.3.2) (Aspartate transcarbamylase) (ATCase)	OTC	ornithine transcarbamylase
3OT7	7KKW	0.877595	0.439	0.585	sodA	Superoxide dismutase [Mn] (EC 1.15.1.1) (MnSOD)	SOD2	superoxide dismutase 2
1QSG	4FC6	0.84286	0.204	0.391	fabI	Enoyl-[acyl-carrier-protein] reductase [NADH] FabI (ENR) (EC 1.3.1.9) (NADH-dependent enoyl-ACP reductase)	DECR2	2,4-dienoyl-CoA reductase 2
1U1C	3P0E	0.803685	0.277	0.394	udp	Uridine phosphorylase (UPase) (UrdPase) (EC 2.4.2.3)	UPP2	uridine phosphorylase 2
1G7W	6DNB	0.93852	0.398	0.541	aspC	Aspartate aminotransferase (AspAT) (EC 2.6.1.1) (Transaminase A)	GOT1	glutamic-oxaloacetic transaminase 1
1AHE	6LIG	0.935225	0.404	0.55	aspC	Aspartate aminotransferase (AspAT) (EC 2.6.1.1) (Transaminase A)	GOT1	glutamic-oxaloacetic transaminase 1
1KVU	1I3N	0.96266	0.514	0.684	galE	UDP-glucose 4-epimerase (EC 5.1.3.2) (Galactowaldenase) (UDP-galactose 4-epimerase)	GALE	UDP-galactose-4-epimerase
2QA3	6DND	0.942255	0.398	0.541	aspC	Aspartate aminotransferase (AspAT) (EC 2.6.1.1) (Transaminase A)	GOT1	glutamic-oxaloacetic transaminase 1
3BHR	1HVY	0.92677	0.505	0.657	thyA	Thymidylate synthase (TS) (TSase) (EC 2.1.1.45)	TYMS	thymidylate synthetase
1F4F	6OJV	0.92673	0.51	0.657	thyA	Thymidylate synthase (TS) (TSase) (EC 2.1.1.45)	TYMS	thymidylate synthetase
1WLR	5X49	0.906105	0.321	0.519	pepP	Xaa-Pro aminopeptidase (EC 3.4.11.9) (Aminoacylproline aminopeptidase) (Aminopeptidase P II) (APP-II) (X-Pro aminopeptidase)	XPNPEP3	X-prolyl aminopeptidase 3
1UDA	1I3N	0.962685	0.517	0.684	galE	UDP-glucose 4-epimerase (EC 5.1.3.2) (Galactowaldenase) (UDP-galactose 4-epimerase)	GALE	UDP-galactose-4-epimerase
1TLC	6OJV	0.931965	0.51	0.668	thyA	Thymidylate synthase (TS) (TSase) (EC 2.1.1.45)	TYMS	thymidylate synthetase
8E9L	6LIG	0.93683	0.409	0.547	aspC	Aspartate aminotransferase (AspAT) (EC 2.6.1.1) (Transaminase A)	GOT1	glutamic-oxaloacetic transaminase 1
1PDA	3EQ1	0.90239	0.408	0.54	hemC	Porphobilinogen deaminase (PBG) (EC 2.5.1.61) (Hydroxymethylbilane synthase) (HMBS) (Pre-uroporphyrinogen synthase)	HMBS	hydroxymethylbilane synthase
7JXF	3HB8	0.90582	0.495	0.64	thyA	Thymidylate synthase (TS) (TSase) (EC 2.1.1.45)	TYMS	thymidylate synthetase
1AHX	6LIG	0.928215	0.404	0.55	aspC	Aspartate aminotransferase (AspAT) (EC 2.6.1.1) (Transaminase A)	GOT1	glutamic-oxaloacetic transaminase 1
1GFS	4E5Y	0.903495	0.283	0.505	fcl	GDP-L-fucose synthase (EC 1.1.1.271) (GDP-4-keto-6-deoxy-D-mannose-3,5-epimerase-4-reductase)	GFUS	GDP-L-fucose synthase
5MHB	5HMS	0.936345	0.405	0.58	hemB	Delta-aminolevulinic acid dehydratase (ALAD) (ALADH) (EC 4.2.1.24) (Porphobilinogen synthase)	ALAD	aminolevulinate dehydratase
1I2N	1F05	0.965625	0.585	0.752	talB	Transaldolase B (EC 2.2.1.2)	TALDO1	transaldolase 1
2WZ7	3M06	0.913365	0.134	0.433	cpoB	Cell division coordinator CpoB	TRAF2	TNF receptor associated factor 2
2GFW	2IWY	0.949925	0.446	0.629	fabF	3-oxoacyl-[acyl-carrier-protein] synthase 2 (EC 2.3.1.179) (3-oxoacyl-[acyl-carrier-protein] synthase II) (Beta-ketoacyl-ACP synthase II) (KAS II)	OXSM	3-oxoacyl-ACP synthase, mitochondrial
4ISK	5X5A	0.927275	0.505	0.654	thyA	Thymidylate synthase (TS) (TSase) (EC 2.1.1.45)	TYMS	thymidylate synthetase
8E9J	3II0	0.944385	0.4	0.541	aspC	Aspartate aminotransferase (AspAT) (EC 2.6.1.1) (Transaminase A)	GOT1	glutamic-oxaloacetic transaminase 1
1KZI	5X66	0.9243	0.505	0.657	thyA	Thymidylate synthase (TS) (TSase) (EC 2.1.1.45)	TYMS	thymidylate synthetase
1JUY	2V40	0.928635	0.412	0.572	purA	Adenylosuccinate synthetase (AMPSase) (AdSS) (EC 6.3.4.4) (IMP--aspartate ligase)	ADSS2	adenylosuccinate synthase 2
1LYL	7EA9	0.920835	0.435	0.613	lysU	Lysine--tRNA ligase, heat inducible (EC 6.1.1.6) (Lysyl-tRNA synthetase) (LysRS)	KARS1	lysyl-tRNA synthetase 1
1AAW	6LIG	0.9503	0.409	0.552	aspC	Aspartate aminotransferase (AspAT) (EC 2.6.1.1) (Transaminase A)	GOT1	glutamic-oxaloacetic transaminase 1
2A9W	6OJV	0.914995	0.51	0.664	thyA	Thymidylate synthase (TS) (TSase) (EC 2.1.1.45)	TYMS	thymidylate synthetase
3N1S	6YVP	0.924475	0.432	0.636	hinT	Purine nucleoside phosphoramidase (EC 3.9.1.-) (Histidine triad nucleotide binding protein HinT) (HIT protein)	HINT2	histidine triad nucleotide binding protein 2
2G2N	4ABW	0.903205	0.31	0.422	hiuH	5-hydroxyisourate hydrolase (HIU hydrolase) (HIUHase) (EC 3.5.2.17) (Transthyretin-like protein) (TLP) (Transthyretin-related protein) (TRP)	TTR	transthyretin
2H6Y	1W89	0.901045	0.333	0.568	trxA	Thioredoxin 1 (Trx-1)	TXN2	thioredoxin 2
1ASG	3II0	0.94745	0.402	0.54	aspC	Aspartate aminotransferase (AspAT) (EC 2.6.1.1) (Transaminase A)	GOT1	glutamic-oxaloacetic transaminase 1
1I2O	1F05	0.96547	0.585	0.752	talB	Transaldolase B (EC 2.2.1.2)	TALDO1	transaldolase 1
1KVR	1EK6	0.96673	0.522	0.686	galE	UDP-glucose 4-epimerase (EC 5.1.3.2) (Galactowaldenase) (UDP-galactose 4-epimerase)	GALE	UDP-galactose-4-epimerase
8E9S	3II0	0.943865	0.404	0.541	aspC	Aspartate aminotransferase (AspAT) (EC 2.6.1.1) (Transaminase A)	GOT1	glutamic-oxaloacetic transaminase 1
1HOR	1NE7	0.95212	0.56	0.709	nagB	Glucosamine-6-phosphate deaminase (EC 3.5.99.6) (GlcN6P deaminase) (GNPDA) (Glucosamine-6-phosphate isomerase)	GNPDA1	glucosamine-6-phosphate deaminase 1
2UDP	1EK6	0.968355	0.524	0.686	galE	UDP-glucose 4-epimerase (EC 5.1.3.2) (Galactowaldenase) (UDP-galactose 4-epimerase)	GALE	UDP-galactose-4-epimerase
1G7X	6DND	0.9556	0.4	0.541	aspC	Aspartate aminotransferase (AspAT) (EC 2.6.1.1) (Transaminase A)	GOT1	glutamic-oxaloacetic transaminase 1
1RG9	6FBO	0.96648	0.558	0.714	metK	S-adenosylmethionine synthase (AdoMet synthase) (EC 2.5.1.6) (MAT) (Methionine adenosyltransferase)	MAT2A	methionine adenosyltransferase 2A
1GES	3DJG	0.962605	0.536	0.676	gor	Glutathione reductase (GR) (GRase) (EC 1.8.1.7)	GSR	glutathione-disulfide reductase
1KJX	2V40	0.929425	0.412	0.572	purA	Adenylosuccinate synthetase (AMPSase) (AdSS) (EC 6.3.4.4) (IMP--aspartate ligase)	ADSS2	adenylosuccinate synthase 2
1LRL	1I3K	0.953695	0.52	0.687	galE	UDP-glucose 4-epimerase (EC 5.1.3.2) (Galactowaldenase) (UDP-galactose 4-epimerase)	GALE	UDP-galactose-4-epimerase
2Q7W	6LIG	0.930735	0.397	0.538	aspC	Aspartate aminotransferase (AspAT) (EC 2.6.1.1) (Transaminase A)	GOT1	glutamic-oxaloacetic transaminase 1
4Y6I	1XK8	0.954295	0.38	0.583	cutA	Divalent-cation tolerance protein CutA (C-type cytochrome biogenesis protein CycY)	CUTA	cutA divalent cation tolerance homolog
6D3Q	3B97	0.944735	0.504	0.654	eno	Enolase (EC 4.2.1.11) (2-phospho-D-glycerate hydro-lyase) (2-phosphoglycerate dehydratase)	ENO1	enolase 1
3ZZJ	3II0	0.941015	0.4	0.533	aspC	Aspartate aminotransferase (AspAT) (EC 2.6.1.1) (Transaminase A)	GOT1	glutamic-oxaloacetic transaminase 1
1BID	3H9K	0.913205	0.495	0.64	thyA	Thymidylate synthase (TS) (TSase) (EC 2.1.1.45)	TYMS	thymidylate synthetase
1ASN	3II0	0.941305	0.405	0.54	aspC	Aspartate aminotransferase (AspAT) (EC 2.6.1.1) (Transaminase A)	GOT1	glutamic-oxaloacetic transaminase 1
3X3U	1XK8	0.94168	0.398	0.602	cutA	Divalent-cation tolerance protein CutA (C-type cytochrome biogenesis protein CycY)	CUTA	cutA divalent cation tolerance homolog
8E9V	3II0	0.946845	0.399	0.534	aspC	Aspartate aminotransferase (AspAT) (EC 2.6.1.1) (Transaminase A)	GOT1	glutamic-oxaloacetic transaminase 1
1ARH	6DND	0.94959	0.402	0.544	aspC	Aspartate aminotransferase (AspAT) (EC 2.6.1.1) (Transaminase A)	GOT1	glutamic-oxaloacetic transaminase 1
1LRJ	1I3K	0.955345	0.517	0.684	galE	UDP-glucose 4-epimerase (EC 5.1.3.2) (Galactowaldenase) (UDP-galactose 4-epimerase)	GALE	UDP-galactose-4-epimerase
1AHE	6DNB	0.917525	0.4	0.546	aspC	Aspartate aminotransferase (AspAT) (EC 2.6.1.1) (Transaminase A)	GOT1	glutamic-oxaloacetic transaminase 1
2H75	1W89	0.900255	0.333	0.586	trxA	Thioredoxin 1 (Trx-1)	TXN2	thioredoxin 2
1CD5	1NE7	0.92659	0.56	0.709	nagB	Glucosamine-6-phosphate deaminase (EC 3.5.99.6) (GlcN6P deaminase) (GNPDA) (Glucosamine-6-phosphate isomerase)	GNPDA1	glucosamine-6-phosphate deaminase 1
3AH6	1XK8	0.941905	0.389	0.611	cutA	Divalent-cation tolerance protein CutA (C-type cytochrome biogenesis protein CycY)	CUTA	cutA divalent cation tolerance homolog
1AMR	6LIG	0.93354	0.409	0.552	aspC	Aspartate aminotransferase (AspAT) (EC 2.6.1.1) (Transaminase A)	GOT1	glutamic-oxaloacetic transaminase 1
1SF2	6V8D	0.901235	0.297	0.494	gabT	4-aminobutyrate aminotransferase GabT (EC 2.6.1.19) (5-aminovalerate transaminase) (EC 2.6.1.48) (GABA aminotransferase) (GABA-AT) (Gamma-amino-N-butyrate transaminase) (GABA transaminase) (Glutamate:succinic semialdehyde transaminase) (L-AIBAT)	OAT	ornithine aminotransferase
1F4G	6QXH	0.920865	0.503	0.649	thyA	Thymidylate synthase (TS) (TSase) (EC 2.1.1.45)	TYMS	thymidylate synthetase
2GCQ	2V40	0.928895	0.412	0.572	purA	Adenylosuccinate synthetase (AMPSase) (AdSS) (EC 6.3.4.4) (IMP--aspartate ligase)	ADSS2	adenylosuccinate synthase 2
3QN6	3II0	0.937635	0.402	0.537	aspC	Aspartate aminotransferase (AspAT) (EC 2.6.1.1) (Transaminase A)	GOT1	glutamic-oxaloacetic transaminase 1
2TSC	6QXG	0.92727	0.502	0.651	thyA	Thymidylate synthase (TS) (TSase) (EC 2.1.1.45)	TYMS	thymidylate synthetase
1L6S	5HMS	0.9331	0.405	0.58	hemB	Delta-aminolevulinic acid dehydratase (ALAD) (ALADH) (EC 4.2.1.24) (Porphobilinogen synthase)	ALAD	aminolevulinate dehydratase
3QPG	6DNB	0.912965	0.403	0.546	aspC	Aspartate aminotransferase (AspAT) (EC 2.6.1.1) (Transaminase A)	GOT1	glutamic-oxaloacetic transaminase 1
2XFW	6ARH	0.908265	0.281	0.494	nanA	N-acetylneuraminate lyase (NAL) (Neu5Ac lyase) (EC 4.1.3.3) (N-acetylneuraminate pyruvate-lyase) (N-acetylneuraminic acid aldolase) (NALase) (Sialate lyase) (Sialic acid aldolase) (Sialic acid lyase)	NPL	N-acetylneuraminate pyruvate lyase
1FS5	1NE7	0.952415	0.56	0.709	nagB	Glucosamine-6-phosphate deaminase (EC 3.5.99.6) (GlcN6P deaminase) (GNPDA) (Glucosamine-6-phosphate isomerase)	GNPDA1	glucosamine-6-phosphate deaminase 1
4ISK	5X67	0.9329	0.509	0.662	thyA	Thymidylate synthase (TS) (TSase) (EC 2.1.1.45)	TYMS	thymidylate synthetase
1CG1	2V40	0.92891	0.41	0.572	purA	Adenylosuccinate synthetase (AMPSase) (AdSS) (EC 6.3.4.4) (IMP--aspartate ligase)	ADSS2	adenylosuccinate synthase 2
2GFW	2C9H	0.95306	0.441	0.627	fabF	3-oxoacyl-[acyl-carrier-protein] synthase 2 (EC 2.3.1.179) (3-oxoacyl-[acyl-carrier-protein] synthase II) (Beta-ketoacyl-ACP synthase II) (KAS II)	OXSM	3-oxoacyl-ACP synthase, mitochondrial
1ASF	3II0	0.938275	0.402	0.54	aspC	Aspartate aminotransferase (AspAT) (EC 2.6.1.1) (Transaminase A)	GOT1	glutamic-oxaloacetic transaminase 1
2AV6	3DDW	0.94709	0.429	0.617	malP	Maltodextrin phosphorylase (EC 2.4.1.1)	PYGL	glycogen phosphorylase L
8E9J	6DND	0.942405	0.402	0.544	aspC	Aspartate aminotransferase (AspAT) (EC 2.6.1.1) (Transaminase A)	GOT1	glutamic-oxaloacetic transaminase 1
1KVU	1I3K	0.96281	0.514	0.684	galE	UDP-glucose 4-epimerase (EC 5.1.3.2) (Galactowaldenase) (UDP-galactose 4-epimerase)	GALE	UDP-galactose-4-epimerase
1UDB	1HZJ	0.970455	0.523	0.688	galE	UDP-glucose 4-epimerase (EC 5.1.3.2) (Galactowaldenase) (UDP-galactose 4-epimerase)	GALE	UDP-galactose-4-epimerase
2IGI	6N6K	0.91479	0.449	0.628	orn	Oligoribonuclease (EC 3.1.15.-)	REXO2	RNA exonuclease 2
1AMR	3II0	0.94766	0.405	0.54	aspC	Aspartate aminotransferase (AspAT) (EC 2.6.1.1) (Transaminase A)	GOT1	glutamic-oxaloacetic transaminase 1
1C2T	1MEO	0.91292	0.392	0.571	purN	Phosphoribosylglycinamide formyltransferase (EC 2.1.2.2) (5'-phosphoribosylglycinamide transformylase) (GAR transformylase) (GART)	GART	phosphoribosylglycinamide formyltransferase, phosphoribosylglycinamide synthetase, phosphoribosylaminoimidazole synthetase
5EAA	6DND	0.956515	0.405	0.546	aspC	Aspartate aminotransferase (AspAT) (EC 2.6.1.1) (Transaminase A)	GOT1	glutamic-oxaloacetic transaminase 1
1HON	2V40	0.92919	0.412	0.572	purA	Adenylosuccinate synthetase (AMPSase) (AdSS) (EC 6.3.4.4) (IMP--aspartate ligase)	ADSS2	adenylosuccinate synthase 2
1QF4	2V40	0.931085	0.412	0.572	purA	Adenylosuccinate synthetase (AMPSase) (AdSS) (EC 6.3.4.4) (IMP--aspartate ligase)	ADSS2	adenylosuccinate synthase 2
1ONR	1F05	0.96655	0.588	0.755	talB	Transaldolase B (EC 2.2.1.2)	TALDO1	transaldolase 1
6OHB	4AQL	0.9085	0.334	0.499	guaD	Guanine deaminase (Guanase) (Guanine aminase) (EC 3.5.4.3) (Guanine aminohydrolase) (GAH)	GDA	guanine deaminase
7JX1	5X5D	0.927935	0.505	0.657	thyA	Thymidylate synthase (TS) (TSase) (EC 2.1.1.45)	TYMS	thymidylate synthetase
2BYW	2C9H	0.919945	0.331	0.517	fabB	3-oxoacyl-[acyl-carrier-protein] synthase 1 (EC 2.3.1.41) (3-oxoacyl-[acyl-carrier-protein] synthase I) (Beta-ketoacyl-ACP synthase I) (KAS I)	OXSM	3-oxoacyl-ACP synthase, mitochondrial
1F4F	6QXG	0.925025	0.503	0.653	thyA	Thymidylate synthase (TS) (TSase) (EC 2.1.1.45)	TYMS	thymidylate synthetase
1AAW	6DNB	0.935465	0.403	0.546	aspC	Aspartate aminotransferase (AspAT) (EC 2.6.1.1) (Transaminase A)	GOT1	glutamic-oxaloacetic transaminase 1
4HWR	4TTV	0.93851	0.446	0.623	thrS	Threonine--tRNA ligase (EC 6.1.1.3) (Threonyl-tRNA synthetase) (ThrRS)	TARS1	threonyl-tRNA synthetase 1
3LCG	6ARH	0.917435	0.289	0.503	nanA	N-acetylneuraminate lyase (NAL) (Neu5Ac lyase) (EC 4.1.3.3) (N-acetylneuraminate pyruvate-lyase) (N-acetylneuraminic acid aldolase) (NALase) (Sialate lyase) (Sialic acid aldolase) (Sialic acid lyase)	NPL	N-acetylneuraminate pyruvate lyase
1ZMR	5O7D	0.90318	0.363	0.564	pgk	Phosphoglycerate kinase (EC 2.7.2.3)	PGK1	phosphoglycerate kinase 1
2BZ3	2IWZ	0.924155	0.332	0.518	fabB	3-oxoacyl-[acyl-carrier-protein] synthase 1 (EC 2.3.1.41) (3-oxoacyl-[acyl-carrier-protein] synthase I) (Beta-ketoacyl-ACP synthase I) (KAS I)	OXSM	3-oxoacyl-ACP synthase, mitochondrial
1C3E	4EW3	0.916895	0.396	0.585	purN	Phosphoribosylglycinamide formyltransferase (EC 2.1.2.2) (5'-phosphoribosylglycinamide transformylase) (GAR transformylase) (GART)	GART	phosphoribosylglycinamide formyltransferase, phosphoribosylglycinamide synthetase, phosphoribosylaminoimidazole synthetase
5Z2L	1WNT	0.90413	0.243	0.421	bdcA	Cyclic-di-GMP-binding biofilm dispersal mediator protein	DCXR	dicarbonyl and L-xylulose reductase
1GQT	5BYF	0.90934	0.35	0.529	rbsK	Ribokinase (RK) (EC 2.7.1.15)	RBKS	ribokinase
1M35	5X49	0.90943	0.321	0.519	pepP	Xaa-Pro aminopeptidase (EC 3.4.11.9) (Aminoacylproline aminopeptidase) (Aminopeptidase P II) (APP-II) (X-Pro aminopeptidase)	XPNPEP3	X-prolyl aminopeptidase 3
2D5Y	6DND	0.93614	0.402	0.544	aspC	Aspartate aminotransferase (AspAT) (EC 2.6.1.1) (Transaminase A)	GOT1	glutamic-oxaloacetic transaminase 1
7JZ7	3S5N	0.93502	0.249	0.418	dapA	4-hydroxy-tetrahydrodipicolinate synthase (HTPA synthase) (EC 4.3.3.7)	HOGA1	4-hydroxy-2-oxoglutarate aldolase 1
1X2A	6DND	0.938815	0.407	0.549	aspC	Aspartate aminotransferase (AspAT) (EC 2.6.1.1) (Transaminase A)	GOT1	glutamic-oxaloacetic transaminase 1
2QA3	3II0	0.927415	0.399	0.542	aspC	Aspartate aminotransferase (AspAT) (EC 2.6.1.1) (Transaminase A)	GOT1	glutamic-oxaloacetic transaminase 1
1EVK	4P3N	0.962905	0.451	0.623	thrS	Threonine--tRNA ligase (EC 6.1.1.3) (Threonyl-tRNA synthetase) (ThrRS)	TARS1	threonyl-tRNA synthetase 1
2VB9	2C9H	0.92105	0.333	0.52	fabB	3-oxoacyl-[acyl-carrier-protein] synthase 1 (EC 2.3.1.41) (3-oxoacyl-[acyl-carrier-protein] synthase I) (Beta-ketoacyl-ACP synthase I) (KAS I)	OXSM	3-oxoacyl-ACP synthase, mitochondrial
1TMH	6NLH	0.924205	0.461	0.586	tpiA	Triosephosphate isomerase (TIM) (TPI) (EC 5.3.1.1) (Triose-phosphate isomerase)	TPI1	triosephosphate isomerase 1
2YPN	3ECR	0.90055	0.409	0.546	hemC	Porphobilinogen deaminase (PBG) (EC 2.5.1.61) (Hydroxymethylbilane synthase) (HMBS) (Pre-uroporphyrinogen synthase)	HMBS	hydroxymethylbilane synthase
1L6Y	5HMS	0.934385	0.405	0.58	hemB	Delta-aminolevulinic acid dehydratase (ALAD) (ALADH) (EC 4.2.1.24) (Porphobilinogen synthase)	ALAD	aminolevulinate dehydratase
