# Supplementary material for: Proteome-wide structural analysis quantifies structural conservation across distant species
Source: HighWire-hosted journal article supplement (doi:10.1101/gr.277771.123), 2023-11-01
Supplement: Supplemental_Table_S2.docx [file Supplemental_Table_S2.docx]

**Supplemental Table 2.** List of the Most Structurally Conserved Proteins between *H. sapiens* and *E. coli* in Twilight Zone

|  | *H. sapiens* Gene | *E. coli* Gene | *H. sapiens* Gene  Full Name | *E. coli* Gene  Full Name | *H. sapiens* Domain Range | *E. coli* Domain Range | Structural Similarity | Sequence Similarity | Sequence Identity |
| --- | --- | --- | --- | --- | --- | --- | --- | --- | --- |
| 1 | *HOGA1* | *dapA* | 4-hydroxy-2-oxoglutarate aldolase 1 | 4-hydroxy-tetrahydrodipicolinate synthase | 30-326 aa | 1-291 aa | 92% | 40% | 24% |
| *NPL* | N-acetylneuraminate pyruvate lyase | 4-hydroxy-tetrahydrodipicolinate synthase | 4-303 aa | 89% | 39% | 24% |
| 2 | *NRDC* | *ptrA* | nardilysin convertase | **Protease 3** | 95-1150 aa | 23-958 aa | 92% | 40% | 24% |
| 3 | *ALDH6A1* | *astD* | aldehyde dehydrogenase 6 family member A1 | N-succinylglutamate 5-semialdehyde dehydrogenase | 25-521 aa | 1-486 aa | 92% | 40% | 24% |
| *saD* | Succinate semialdehyde dehydrogenase [NAD(P)+] Sad | 3-461 aa | 89% | 46% | 24% |
| 4 | *MFSD2A* | *yagG* | MFSD2 lysolipid transporter A, lysophospholipid | Putative glycoside/cation symporter YagG | 39-527 aa | 2-447 aa | 91% | 41% | 22% |
| *yicJ* | Inner membrane symporter YicJ | 3-447 aa | 91% | 37% | 20% |
| 5 | *SLC17A4* | *gudP* | solute carrier family 17 member 4 | Probable galactarate/D-glucarate transporter GudP | 32-490 aa | 12-444 aa | 91% | 42% | 24% |
| *lgoT* | Probable L-galactonate transporter | 29-451 aa | 91% | 42% | 21% |
| 6 | *ECHDC3* | *paaG* | enoyl-CoA hydratase domain containing 3 | 1,2-epoxyphenylacetyl-CoA isomerase | 43-302 aa | 1-261 aa | 91% | 44% | 24% |
| 7 | *GOT1L1* | *tyrB* | glutamic-oxaloacetic transaminase 1 like 1 | Aromatic-amino-acid aminotransferase | 4-403 aa | 1-396 aa | 91% | 47% | 24% |
| 8 | *SVOP* | *ydjK* | SV2 related protein | Putative metabolite transport protein YdjK | 65-516 aa | 3-446 aa | 91% | 38% | 20% |
| *yaaU* | Putative metabolite transport protein YaaU | 4-437 aa | 89% | 42% | 22% |
| *SVOPL* | SVOP like | 29-486 aa | 88% | 40% | 21% |
| 9 | *ALDH7A1* | *puuC* | aldehyde dehydrogenase 7 family member A1 | NADP/NAD-dependent aldehyde dehydrogenase PuuC | 29-538 aa | 1-494 aa | 90% | 42% | 25% |
| *feaB* | Phenylacetaldehyde dehydrogenase | 29-538 aa | 2-498 aa | 90% | 42% | 24% |
| 10 | *GLYR1* | *ltnD* | glyoxylate reductase 1 homolog | L-threonate dehydrogenase | 260-552 aa | 4-299 aa | 90% | 43% | 22% |
| 11 | *ACSM4* | *caiC* | acyl-CoA synthetase medium chain family member 4 | Crotonobetaine/carnitine--CoA ligase | 30-470 aa | 1-419 aa | 89% | 40% | 23% |
| *ACSM2A* | acyl-CoA synthetase medium chain family member 2A | 32-463 aa | 1-419 aa | 90% | 42% | 25% |
| *fadK* | Medium-chain fatty-acid--CoA ligase | 32-463 aa | 19-451 aa | 89% | 40% | 24% |
| *ACSM1* | acyl-CoA synthetase medium chain family member 1 | 39-468 aa | 19-451 aa | 89% | 36% | 22% |
| 12 | *SUGCT* | *caiB* | succinyl-CoA:glutarate-CoA transferase | L-carnitine CoA-transferase | 42-443 aa | 1-404 aa | 90% | 37% | 24% |
| 13 | *SLC17A4* | *exuT* | solute carrier family 17 member 4 | Hexuronate transporter | 32-490 aa | 2-414 aa | 90% | 37% | 20% |
| 14 | *DHRS4* | *srlD* | dehydrogenase/reductase 4 | Sorbitol-6-phosphate 2-dehydrogenase | 25-277 aa | 1-258 aa | 90% | 44% | 25% |
| *DHRS4L1* | dehydrogenase/reductase 4 like 1 | 25-280 aa | 90% | 41% | 24% |
| *ygcW* | Uncharacterized oxidoreductase YgcW | 1-260 aa | 89% | 42% | 25% |
| 15 | *TAP2* | *mdlA* | transporter 2, ATP binding cassette subfamily B member | Multidrug resistance-like ATP-binding protein MdlA | 131-681 aa | 1-578 aa | 89% | 42% | 25% |
| 16 | *SLC2A1* | *araE* | solute carrier family 2 member 1 | Arabinose-proton symporter | 6-468 aa | 14-471 aa | 89% | 47% | 25% |
| 17 | *SLC17A9* | *dgoT* | solute carrier family 17 member 9 | D-galactonate transporter | 14-428 aa | 10-423 aa | 89% | 40% | 22% |
| 18 | *DHDH* | *ygjR* | dihydrodiol dehydrogenase | Uncharacterized oxidoreductase YgjR | 1-333 aa | 1-327 aa | 89% | 41% | 24% |
| 19 | *RBKS* | *yeiI* | ribokinase | Uncharacterized sugar kinase YeiI | 13-321 aa | 55-360 aa | 89% | 40% | 24% |
| 20 | *NSDHL* | *ybjS* | NAD(P) dependent steroid dehydrogenase-like | Uncharacterized protein YbjS | 35-372 aa | 1-333 aa | 89% | 42% | 24% |
| 21 | *SLC16A13* | *yajR* | solute carrier family 16 member 13 | Inner membrane transport protein YajR | 5-396 aa | 1-393 aa | 89% | 33% | 20% |
| *nepI* | Purine ribonucleoside efflux pump NepI | 14-391 aa | 89% | 37% | 21% |
| 22 | *SLC16A9* | *dgoT* | solute carrier family 16 member 9 | D-galactonate transporter | 5-483 aa | 10-423 aa | 89% | 34% | 22% |
| *yhjX* | Uncharacterized MFS-type transporter YhjX | 14-391 aa | 89% | 37% | 21% |
