# Supplementary material for: Proteome-wide structural analysis quantifies structural conservation across distant species
Source: HighWire-hosted journal article supplement (doi:10.1101/gr.277771.123), 2023-11-01
Supplement: Supplemental_Table_S3.docx [file Supplemental_Table_S3.docx]

**Supplementary Table 3.** List of the Most Structurally Conserved Proteins between *H. sapiens* and *M. jannaschii* in the Twilight Zone

|  | *H. sapiens* Gene | *M. jannaschii* Gene | *H. sapiens* Gene  Full Name | *M. jannaschii* Gene  Full Name | *H. sapiens* Domain Range | *M. jannaschii* Domain Range | Structural Similarity | Sequence Similarity | Sequence Identity |
| --- | --- | --- | --- | --- | --- | --- | --- | --- | --- |
| 1 | *PSMB3* | *psmB* | proteasome 20S subunit beta 3 | Proteasome subunit beta | 1-204 aa | 4-208 aa | 90% | 44% | 22% |
| *PSMB2* | proteasome 20S subunit beta 2 | 1-197 aa | 87% | 44% | 24% |
| 2 | *PEX1* | *pan* | peroxisomal biogenesis factor 1 | Proteasome-activating nucleotidase | 830-1261 aa | 159-416 aa | 88% | 36% | 23% |
| *MJ1156* | Cell division cycle protein 48 homolog MJ1156 | 172-437 aa | 89% | 35% | 25% |
| *PSMC3* | proteasome 26S subunit, ATPase 3 | 167-430 aa | 442-887 aa | 89% | 36% | 25% |
| *PSMC6* | proteasome 26S subunit, ATPase 6 | 113-380 aa | 88% | 35% | 25% |
| *AFG2B* | AFG2 AAA ATPase homolog B | 199-449 aa | 86% | 34% | 24% |
| *ATAD1* | ATPase family AAA domain containing 1 | 67-349 aa | 85% | 35% | 22% |
| *FIGN* | fidgetin, microtubule severing factor | 462-758 aa | 84% | 34% | 20% |
| 3 | *NDUFS2* | *MJ0515* | NADH:ubiquinone oxidoreductase core subunit S2 | Uncharacterized protein MJ0515 | 77-462 aa | 3-363 aa | 88% | 44% | 24% |
| 4 | *EIF2S1* | *eif2a* | eukaryotic translation initiation factor 2 subunit alpha | Translation initiation factor 2 subunit alpha | 186-277 aa | 174-265 aa | 88% | 44% | 25% |
| 5 | *LDHB* | *mdh* | lactate dehydrogenase B | Malate dehydrogenase | 1-333 aa | 1-312 aa | 87% | 49% | 25% |
| 6 | *DCTN5* | *MJ0304* | dynactin subunit 5 | Probable carbonic anhydrase | 10-175 aa | 1-158 aa | 87% | 42% | 23% |
| 7 | *RARS2* | *argS* | arginyl-tRNA synthetase 2, mitochondria | Arginine--tRNA ligase | 1-577 aa | 1-565 aa | 86% | 45% | 24% |
| 8 | *GALE* | *MJ1055* | UDP-galactose-4-epimerase | Uncharacterized protein MJ1055 | 1-347 aa | 1-325 aa | 86% | 42% | 24% |
| 9 | *TAT* | *MJ1479* | tyrosine aminotransferase | Putative protein adenylyltransferase MJ1379 | 38-444 aa | 1-431 aa | 86% | 40% | 25% |
| 10 | *HACL1* | *ilvB* | 2-hydroxyacyl-CoA lyase 1 | Probable acetolactate synthase large subunit | 10-572 aa | 1-583 aa | 86% | 43% | 24% |
| 11 | *TBPL1* | *tbp* | TATA-box binding protein like 1 | TATA-box-binding protein | 7-183 aa | 3-182 aa | 86% | 48% | 24% |
| 12 | *PHYKPL* | *bioA* | 5-phosphohydroxy-L-lysine phospho-lyase | Adenosylmethionine-8-amino-7-oxononanoate aminotransferase | 3-442 aa | 1-460 aa | 86% | 43% | 22% |
| 13 | *RIMKLA* | *mptN* | ribosomal modification protein rimK like family member A | Tetrahydromethanopterin:alpha-L-glutamate ligase | 1-305 aa | 1-290 aa | 85% | 44% | 23% |
| *RIMKLB* | **ribosomal modification protein rimK like family member B** | 4-309 aa | 85% | 42% | 23% |
| 14 | *NAA50* | *MJ1530* | N-alpha-acetyltransferase 50, NatE catalytic subunit | Uncharacterized N-acetyltransferase MJ1530 | 2-155 aa | 1-155 aa | 85% | 37% | 22% |
| 15 | *RBKS* | *MJ0406* | ribokinase | **Nucleoside kinase** | 13-321 aa | 3-301 aa | 85% | 37% | 23% |
| 16 | *SLC9B1* | *MJ0057* | solute carrier family 9 member B1 | **Na(+)/H(+) antiporter 1** | 88-500 aa | 1-413 aa | 84% | 39% | 22% |
| 17 | *ALDH3B1* | *MJ1411* | **aldehyde dehydrogenase 3 family member B1** | **Lactaldehyde dehydrogenase** | 1-460 aa | 1-462 aa | 84% | 40% | 22% |
| *ALDH3A2* | **aldehyde dehydrogenase 3 family member A2** | 1-457 aa | 1-462 aa | 84% | 42% | 21% |
| 18 | *C15orf40* | *MJ0618* | chromosome 15 open reading frame 40 | **UPF0235 protein MJ0618** | 52-152 aa | 1-97 aa | 84% | 50% | 24% |
| 19 | *MAT2B* | *MJ0211* | methionine adenosyltransferase 2 non-catalytic beta subunit | **Putative UDP-glucose 4-epimerase** | 26-326 aa | 1-302 aa | 84% | 39% | 24% |
|  | *GFUS* | GDP-L-fucose synthase | 5-320 aa | 1-302 aa | 83% | 39% | 23% |
| 20 | *ATP2B4* | *MJ1226* | ATPase plasma membrane Ca2+ transporting 4 | **Putative cation-transporting ATPase MJ1226** | 88-1050 aa | 43-802 aa | 84% | 40% | 24% |
| *ATP2B2* | ATPase plasma membrane Ca2+ transporting 2 | 90-1088 aa | 83% | 39% | 22% |
