# Supplementary material for: Proteome-wide structural analysis quantifies structural conservation across distant species
Source: HighWire-hosted journal article supplement (doi:10.1101/gr.277771.123), 2023-11-01
Supplement: Supplemental_Table_S4.xlsx [file Supplemental_Table_S4.xlsx]

## Sheet: Homo_sapiens_to_Ecoli
Supplemental Table S4: Structure Conservative scores for different organisms (one sheet for each species): H. sapiens to E. coli., H. sapiens to M. jannaschii., H. sapiens to Ca. Lokiarchaeum sp. GC14_75, H. sapiens to Ca. Prometheoarchaeum syntrophicum and H. sapiens to Caulobacter vibrioides.
UniProt ID	Structural Conservative Scores	Gene Symbol	Gene Full Name
A0A024RBG1	0.73645	NUDT4B	nudix hydrolase 4B
A0A075B6H5	0.54661	TRBV20OR9-2	T cell receptor beta variable 20/OR9-2 (non-functional)
A0A075B6H7	0.54939	IGKV3-7	immunoglobulin kappa variable 3-7 (non-functional)
A0A075B6H8	0.56784	IGKV1D-42	immunoglobulin kappa variable 1D-42 (non-functional)
A0A075B6H9	0.5673	IGLV4-69	immunoglobulin lambda variable 4-69
A0A075B6I0	0.52956	IGLV8-61	immunoglobulin lambda variable 8-61
A0A075B6I1	0.55388	IGLV4-60	immunoglobulin lambda variable 4-60
A0A075B6I3	0.54235	IGLV11-55	immunoglobulin lambda variable 11-55 (non-functional)
A0A075B6I4	0.53065	IGLV10-54	immunoglobulin lambda variable 10-54
A0A075B6I6	0.54577	IGLV1-50	immunoglobulin lambda variable 1-50 (non-functional)
A0A075B6I7	0.46082	IGLV5-48	immunoglobulin lambda variable 5-48 (non-functional)
A0A075B6I9	0.53889	IGLV7-46	immunoglobulin lambda variable 7-46
A0A075B6J1	0.53555	IGLV5-37	immunoglobulin lambda variable 5-37
A0A075B6J2	0.5322	IGLV2-33	immunoglobulin lambda variable 2-33 (non-functional)
A0A075B6J6	0.52468	IGLV3-22	immunoglobulin lambda variable 3-22
A0A075B6J9	0.53968	IGLV2-18	immunoglobulin lambda variable 2-18
A0A075B6K0	0.52685	IGLV3-16	immunoglobulin lambda variable 3-16
A0A075B6K2	0.53207	IGLV3-12	immunoglobulin lambda variable 3-12
A0A075B6K4	0.53864	IGLV3-10	immunoglobulin lambda variable 3-10
A0A075B6K5	0.53041	IGLV3-9	immunoglobulin lambda variable 3-9
A0A075B6K6	0.54929	IGLV4-3	immunoglobulin lambda variable 4-3
A0A075B6L2	0.56262	TRGV11	T cell receptor gamma variable 11 (non-functional)
A0A075B6L6	0.5102	TRBV7-3	T cell receptor beta variable 7-3
A0A075B6N1	0.52362	TRBV19	T cell receptor beta variable 19
A0A075B6N2	0.54971	TRBV20-1	T cell receptor beta variable 20-1
A0A075B6N3	0.53219	TRBV24-1	T cell receptor beta variable 24-1
A0A075B6N4	0.51775	TRBV25-1	T cell receptor beta variable 25-1
A0A075B6P5	0.5525	IGKV2-28	immunoglobulin kappa variable 2-28
A0A075B6Q5	0.55412	IGHV3-64	immunoglobulin heavy variable 3-64
A0A075B6R0	0.48308	TRGV2	T cell receptor gamma variable 2
A0A075B6R2	0.5571	IGHV4-4	immunoglobulin heavy variable 4-4
A0A075B6R9	0.54216	IGKV2D-24	immunoglobulin kappa variable 2D-24 (non-functional)
A0A075B6S2	0.54649	IGKV2D-29	immunoglobulin kappa variable 2D-29
A0A075B6S4	0.56946	IGKV1D-17	immunoglobulin kappa variable 1D-17
A0A075B6S5	0.55661	IGKV1-27	immunoglobulin kappa variable 1-27
A0A075B6S6	0.5482	IGKV2D-30	immunoglobulin kappa variable 2D-30
A0A075B6S9	0.55525	IGKV1-37	immunoglobulin kappa variable 1-37 (non-functional)
A0A075B6T6	0.52924	TRAV12-2	T cell receptor alpha variable 12-2
A0A075B6T7	0.54168	TRAV6	T cell receptor alpha variable 6
A0A075B6T8	0.52364	TRAV9-1	T cell receptor alpha variable 9-1
A0A075B6U4	0.52635	TRAV7	T cell receptor alpha variable 7
A0A075B6U6	0.54219	TRAV8-7	T cell receptor alpha variable 8-7 (pseudogene)
A0A075B6V5	0.54946	TRAV36DV7	T cell receptor alpha variable 36/delta variable 7
A0A075B6W5	0.53153	TRAV23DV6	T cell receptor alpha variable 23/delta variable 6
A0A075B6X5	0.53041	TRAV18	T cell receptor alpha variable 18
A0A075B734	0.92532	AQP7B	aquaporin 7B
A0A075B759	0.82199	PPIAL4E	peptidylprolyl isomerase A like 4E
A0A075B767	0.82159	PPIAL4H	peptidylprolyl isomerase A like 4H
A0A075B7B6	0.55693	IGHV4OR15-8	immunoglobulin heavy variable 4/OR15-8 (non-functional)
A0A075B7B8	0.47849	IGHV3OR16-12	immunoglobulin heavy variable 3/OR16-12 (non-functional)
A0A075B7D0	0.56209	IGHV1OR15-1	immunoglobulin heavy variable 1/OR15-1 (non-functional)
A0A075B7D4	0.56525	IGKV1OR2-108	immunoglobulin kappa variable 1/OR2-108 (non-functional)
A0A075B7D8	0.54557	IGHV3OR15-7	immunoglobulin heavy variable 3/OR15-7 (pseudogene)
A0A075B7E8	0.55094	IGHV3OR16-13	immunoglobulin heavy variable 3/OR16-13 (non-functional)
A0A075B7F0	0.55184	IGHV3OR16-10	immunoglobulin heavy variable 3/OR16-10 (non-functional)
A0A075B7F1	0.54974	IGHV3OR16-8	immunoglobulin heavy variable 3/OR16-8 (non-functional)
A0A087WSX0	0.55833	IGLV5-45	immunoglobulin lambda variable 5-45
A0A087WSY4	0.55677	IGHV4-30-2	immunoglobulin heavy variable 4-30-2
A0A087WSY6	0.56163	IGKV3D-15	immunoglobulin kappa variable 3D-15
A0A087WSZ0	0.56819	IGKV1D-8	immunoglobulin kappa variable 1D-8
A0A087WSZ9	0.55003	TRAV30	T cell receptor alpha variable 30
A0A087WT01	0.51556	TRAV27	T cell receptor alpha variable 27
A0A087WT02	0.52818	TRAV9-2	T cell receptor alpha variable 9-2
A0A087WT03	0.50705	TRAV26-1	T cell receptor alpha variable 26-1
A0A087WUV0	0.3109	LOC344065	Zinc finger protein 2
A0A087WV53	0.54263	SPEGNB	SPEG neighbor
A0A087WV62	0.52626	TRBV16	T cell receptor beta variable 16
A0A087WVF3	0.34646	TBC1D3D	TBC1 domain family member 3D
A0A087WW49	0.55734		Ig-like domain-containing protein
A0A087WW87	0.54457	IGKV2-40	immunoglobulin kappa variable 2-40
A0A087WX78	0.48288
A0A087WXS9	0.34386	TBC1D3I	TBC1 domain family member 3I
A0A087WYE8	0.56718	IGHV1OR21-1	immunoglobulin heavy variable 1/OR21-1 (non-functional)
A0A087WZ39	0.52858	TRBV15	T cell receptor beta variable 15
A0A087X0K7	0.50938	TRBV17	T cell receptor beta variable 17 (non-functional)
A0A087X0M5	0.52173	TRBV18	T cell receptor beta variable 18
A0A087X179	0.34783	TBC1D3E	TBC1 domain family member 3E
A0A087X1C5	0.32957	CYP2D7	cytochrome P450 family 2 subfamily D member 7 (gene/pseudogene)
A0A087X1G2	0.35509	TBC1D3K	TBC1 domain family member 3K
A0A087X1L8	0.60426	LOC102723996	Ig-like domain-containing protein
A0A096LNW5	0.323255	NOTCH2NLR	notch 2 N-terminal like R
A0A096LP49	0.91597	CCDC187	coiled-coil domain containing 187
A0A096LP55	0.60976	UQCRHL	ubiquinol-cytochrome c reductase hinge protein like
A0A096LPH7	0.53133		TRAPPC10 domain-containing protein
A0A096LPK6	0.40637		Exostosin domain-containing protein
A0A096LPK9	0.50631	OR4N4C	olfactory receptor family 4 subfamily N member 4C
A0A0A0MRZ7	0.54983	IGKV2D-26	immunoglobulin kappa variable 2D-26
A0A0A0MRZ8	0.55747	IGKV3D-11	immunoglobulin kappa variable 3D-11
A0A0A0MRZ9	0.5504	IGLV5-52	immunoglobulin lambda variable 5-52
A0A0A0MS00	0.4804	IGLV3-32	immunoglobulin lambda variable 3-32 (non-functional)
A0A0A0MS01	0.54277	TRGV10	T cell receptor gamma variable 10 (non-functional)
A0A0A0MS02	0.49592	TRGV1	T cell receptor gamma variable 1 (non-functional)
A0A0A0MS03	0.53814	TRBV5-3	T cell receptor beta variable 5-3 (non-functional)
A0A0A0MS04	0.51969	TRBV6-7	T cell receptor beta variable 6-7 (non-functional)
A0A0A0MS05	0.52924	TRBV5-7	T cell receptor beta variable 5-7 (non-functional)
A0A0A0MS06	0.51638	TRBV23-1	T cell receptor beta variable 23-1 (non-functional)
A0A0A0MS14	0.57145	IGHV1-45	immunoglobulin heavy variable 1-45
A0A0A0MS15	0.55262	IGHV3-49	immunoglobulin heavy variable 3-49
A0A0A0MT36	0.57155	IGKV6D-21	immunoglobulin kappa variable 6D-21 (non-functional)
A0A0A6YYC5	0.53783	TRAV14DV4	T cell receptor alpha variable 14/delta variable 4
A0A0A6YYD4	0.52554	TRBV13	T cell receptor beta variable 13
A0A0A6YYG2	0.51932	TRBV6-6	T cell receptor beta variable 6-6
A0A0A6YYG3	0.51791	TRBV6-8	T cell receptor beta variable 6-8
A0A0A6YYJ7	0.53284	TRAV8-3	T cell receptor alpha variable 8-3
A0A0A6YYK1	0.53558	TRAV8-1	T cell receptor alpha variable 8-1
A0A0A6YYK4	0.4599	TRBV7-1	T cell receptor beta variable 7-1 (non-functional)
A0A0A6YYK6	0.53079	TRAV16	T cell receptor alpha variable 16
A0A0A6YYK7	0.54468	TRAV19	T cell receptor alpha variable 19
A0A0A6YYL3	0.754224	POTEB	POTE ankyrin domain family member B
A0A0B4J1T7	0.38751	LY6G6E	lymphocyte antigen 6 family member G6E (pseudogene)
A0A0B4J1U3	0.5346	IGLV1-36	immunoglobulin lambda variable 1-36
A0A0B4J1U4	0.47999	TRGV5	T cell receptor gamma variable 5
A0A0B4J1U6	0.51566	TRBV9	T cell receptor beta variable 9
A0A0B4J1U7	0.55709	IGHV6-1	immunoglobulin heavy variable 6-1
A0A0B4J1V0	0.55234	IGHV3-15	immunoglobulin heavy variable 3-15
A0A0B4J1V1	0.54456	IGHV3-21	immunoglobulin heavy variable 3-21
A0A0B4J1V2	0.56064	IGHV2-26	immunoglobulin heavy variable 2-26
A0A0B4J1V6	0.54485	IGHV3-73	immunoglobulin heavy variable 3-73
A0A0B4J1V7	0.55325	IGHV7-81	immunoglobulin heavy variable 7-81 (non-functional)
A0A0B4J1W7	0.87079	NPIPA9	nuclear pore complex interacting protein family, member A9
A0A0B4J1X5	0.55031	IGHV3-74	immunoglobulin heavy variable 3-74
A0A0B4J1X8	0.54947	IGHV3-43	immunoglobulin heavy variable 3-43
A0A0B4J1Y8	0.56245	IGLV9-49	immunoglobulin lambda variable 9-49
A0A0B4J1Y9	0.54577	IGHV3-72	immunoglobulin heavy variable 3-72
A0A0B4J1Z2	0.56837	IGKV1D-43	immunoglobulin kappa variable 1D-43
A0A0B4J234	0.51449	TRAV2	T cell receptor alpha variable 2
A0A0B4J235	0.46829	TRAV13-2	T cell receptor alpha variable 13-2
A0A0B4J237	0.51948	TRAV8-2	T cell receptor alpha variable 8-2
A0A0B4J238	0.51447	TRAV1-2	T cell receptor alpha variable 1-2
A0A0B4J240	0.54124	TRAV10	T cell receptor alpha variable 10
A0A0B4J241	0.54765	TRAV13-1	T cell receptor alpha variable 13-1
A0A0B4J244	0.53019	TRAV3	T cell receptor alpha variable 3
A0A0B4J245	0.53455	TRAV12-1	T cell receptor alpha variable 12-1
A0A0B4J248	0.53626	TRAV1-1	T cell receptor alpha variable 1-1
A0A0B4J249	0.51302	TRAV5	T cell receptor alpha variable 5
A0A0B4J262	0.52327	TRAV8-6	T cell receptor alpha variable 8-6
A0A0B4J263	0.53104	TRAV39	T cell receptor alpha variable 39
A0A0B4J264	0.53692	TRAV38-1	T cell receptor alpha variable 38-1
A0A0B4J265	0.5139	TRAV26-2	T cell receptor alpha variable 26-2
A0A0B4J266	0.52996	TRAV41	T cell receptor alpha variable 41
A0A0B4J268	0.52472	TRAV4	T cell receptor alpha variable 4
A0A0B4J271	0.52856	TRAV12-3	T cell receptor alpha variable 12-3
A0A0B4J272	0.53678	TRAV24	T cell receptor alpha variable 24
A0A0B4J273	0.54803	TRAV34	T cell receptor alpha variable 34
A0A0B4J274	0.52591	TRAV20	T cell receptor alpha variable 20
A0A0B4J275	0.47434	TRAV17	T cell receptor alpha variable 17
A0A0B4J276	0.52096	TRAV25	T cell receptor alpha variable 25
A0A0B4J277	0.55026	TRAV22	T cell receptor alpha variable 22
A0A0B4J279	0.55623	TRAV21	T cell receptor alpha variable 21
A0A0B4J280	0.56141	TRAV40	T cell receptor alpha variable 40
A0A0B4J2A2	0.8217	PPIAL4C	peptidylprolyl isomerase A like 4C
A0A0B4J2B6	0.56317	IGHV2OR16-5	immunoglobulin heavy variable 2/OR16-5 (non-functional)
A0A0B4J2B8	0.56503	IGHV1OR15-9	immunoglobulin heavy variable 1/OR15-9 (non-functional)
A0A0B4J2D5	0.92059	GATD3B	Putative glutamine amidotransferase-like class 1 domain-containing protein 3B, mitochondrial (Keio novel protein-I) (KNP-I) (Protein GT335) (Protein HES1)
A0A0B4J2D9	0.56852	IGKV1D-13	immunoglobulin kappa variable 1D-13
A0A0B4J2E0	0.50834	TRBV12-4	T cell receptor beta variable 12-4
A0A0B4J2E5	0.33228		Utp12 domain-containing protein
A0A0B4J2F2	0.50549	SIK1B	Putative serine/threonine-protein kinase SIK1B (EC 2.7.11.1) (Salt-inducible kinase 1B)
A0A0B4J2H0	0.565	IGHV1-69D	immunoglobulin heavy variable 1-69D
A0A0C4DH24	0.56795	IGKV6-21	immunoglobulin kappa variable 6-21 (non-functional)
A0A0C4DH25	0.55276	IGKV3D-20	immunoglobulin kappa variable 3D-20
A0A0C4DH26	0.56756	IGKV6D-41	immunoglobulin kappa variable 6D-41 (non-functional)
A0A0C4DH27	0.48946	TRGV8	T cell receptor gamma variable 8
A0A0C4DH28	0.48039	TRGV4	T cell receptor gamma variable 4
A0A0C4DH29	0.56585	IGHV1-3	immunoglobulin heavy variable 1-3
A0A0C4DH30	0.55111	IGHV3-16	immunoglobulin heavy variable 3-16 (non-functional)
A0A0C4DH31	0.56582	IGHV1-18	immunoglobulin heavy variable 1-18
A0A0C4DH32	0.54371	IGHV3-20	immunoglobulin heavy variable 3-20
A0A0C4DH33	0.56202	IGHV1-24	immunoglobulin heavy variable 1-24
A0A0C4DH34	0.559	IGHV4-28	immunoglobulin heavy variable 4-28
A0A0C4DH35	0.55123	IGHV3-35	immunoglobulin heavy variable 3-35 (non-functional)
A0A0C4DH36	0.56706	IGHV3-38	immunoglobulin heavy variable 3-38 (non-functional)
A0A0C4DH38	0.54401	IGHV5-51	immunoglobulin heavy variable 5-51
A0A0C4DH39	0.57055	IGHV1-58	immunoglobulin heavy variable 1-58
A0A0C4DH41	0.55759	IGHV4-61	immunoglobulin heavy variable 4-61
A0A0C4DH42	0.56222	IGHV3-66	immunoglobulin heavy variable 3-66
A0A0C4DH43	0.5603	IGHV2-70D	immunoglobulin heavy variable 2-70D
A0A0C4DH55	0.56373	IGKV3D-7	immunoglobulin kappa variable 3D-7
A0A0C4DH59	0.53158	TRBV5-4	T cell receptor beta variable 5-4
A0A0C4DH67	0.56859	IGKV1-8	immunoglobulin kappa variable 1-8
A0A0C4DH68	0.543	IGKV2-24	immunoglobulin kappa variable 2-24
A0A0C4DH69	0.56697	IGKV1-9	immunoglobulin kappa variable 1-9
A0A0C4DH72	0.56782	IGKV1-6	immunoglobulin kappa variable 1-6
A0A0C4DH73	0.56617	IGKV1-12	immunoglobulin kappa variable 1-12
A0A0C4DH90	0.56479	IGKV3OR2-268	immunoglobulin kappa variable 3/OR2-268 (non-functional)
A0A0G2JKD1	0.578967	MUC21	mucin 21, cell surface associated
A0A0G2JLG4	0.30564	ASIC5	acid sensing ion channel subunit family member 5
A0A0G2JLM5	0.41236	KIR2DS5	killer cell immunoglobulin like receptor, two Ig domains and short cytoplasmic tail 5
A0A0G2JLQ3	0.5518	KIR2DS5	killer cell immunoglobulin like receptor, two Ig domains and short cytoplasmic tail 5
A0A0G2JMD5	0.482853	PRAMEF33	PRAME family member 33
A0A0G2JMH6	0.38486	HLA-DRA	major histocompatibility complex, class II, DR alpha
A0A0G2JMI3	0.56326	IGHV1-69-2	immunoglobulin heavy variable 1-69-2
A0A0G2JMM0	0.40752		Killer cell immunoglobulin-like receptor
A0A0G2JMP0	0.75287	OR4M2B	olfactory receptor family 4 subfamily M member 2B
A0A0G2JMS6	0.594079		Ovostatin
A0A0G2JN01	0.40716	KIR3DP1	killer cell immunoglobulin like receptor, three Ig domains pseudogene 1
A0A0G2JN53	0.84154		IQ motif and SEC7 domain-containing protein 3
A0A0G2JN68	0.53541	KIR2DL5B	killer cell immunoglobulin like receptor, two Ig domains and long cytoplasmic tail 5B
A0A0G2JNF4	0.54969	KIR2DP1	killer cell immunoglobulin like receptor, two Ig domains pseudogene 1
A0A0G2JNG1	0.54645	KIR2DS5	killer cell immunoglobulin like receptor, two Ig domains and short cytoplasmic tail 5
A0A0G2JNH3	0.51869		Olfactory receptor
A0A0G2JNQ3	0.62393	HNRNPCL2	heterogeneous nuclear ribonucleoprotein C like 2
A0A0G2JP20	0.45486	PRAMEF9	PRAME family member 9
A0A0G2JPB7	0.45827	BTNL2	butyrophilin like 2
A0A0G2JPC4	0.53507	KIR2DL5B	killer cell immunoglobulin like receptor, two Ig domains and long cytoplasmic tail 5B
A0A0G2JPF8	0.62443	HNRNPCL4	heterogeneous nuclear ribonucleoprotein C like 4
A0A0G2JQ47	0.54202	KIR2DS1	killer cell immunoglobulin like receptor, two Ig domains and short cytoplasmic tail 1
A0A0G2JRQ6	0.56819		Ig-like domain-containing protein
A0A0G2JS06	0.53949	IGLV5-39	immunoglobulin lambda variable 5-39
A0A0J9YVY3	0.5588	IGHV7-4-1	immunoglobulin heavy variable 7-4-1
A0A0J9YW62	0.56114		IGv domain-containing protein
A0A0J9YWL9	0.54226	TEX13C	TEX13 family member C
A0A0J9YWU9	0.54696		Ig-like domain-containing protein
A0A0J9YX35	0.54498	IGHV3-64D	immunoglobulin heavy variable 3-64D
A0A0J9YX57	0.551141	MAGEB6B	MAGE family member B6B
A0A0J9YX75	0.51892	TRBV6-9	T cell receptor beta variable 6-9
A0A0J9YX94	0.522396	PNMA6F	PNMA family member 6F
A0A0J9YXQ4	0.507406	PNMA6E	PNMA family member 6E
A0A0J9YXX1	0.54622	IGHV5-10-1	immunoglobulin heavy variable 5-10-1
A0A0J9YXY3	0.52372	TRBV6-2	T cell receptor beta variable 6-2
A0A0J9YY54	0.8386	TEX13D	TEX13 family member D
A0A0J9YY99	0.54673		Ig-like domain-containing protein
A0A0K0K1A3	0.51832	TRBV10-1	T cell receptor beta variable 10-1
A0A0K0K1A5	0.52142	TRBV6-5	T cell receptor beta variable 6-5
A0A0K0K1B3	0.54348	TRBV30	T cell receptor beta variable 30
A0A0K0K1C0	0.51152	TRBV11-1	T cell receptor beta variable 11-1
A0A0K0K1C4	0.51581	TRBV27	T cell receptor beta variable 27
A0A0K0K1D8	0.52423	TRBV6-1	T cell receptor beta variable 6-1
A0A0K0K1E9	0.51223	TRBV7-7	T cell receptor beta variable 7-7
A0A0K0K1G6	0.52835	TRBV10-3	T cell receptor beta variable 10-3
A0A0K0K1G8	0.52185	TRBV10-2	T cell receptor beta variable 10-2
A0A0K2S4Q6	0.6285	CD300H	CD300H molecule (gene/pseudogene)
A0A0M3HER8	0.682272	GOLGA6L10	golgin A6 family like 10
A0A0U1RQE8	0.51137	GLYATL1B	glycine-N-acyltransferase like 1B
A0A0U1RQI7	0.47452	KLF18	KLF transcription factor 18
A0A0U1RR11	0.39112	CENPVL1	centromere protein V like 1
A0A0U1RRI6	0.42043	CENPVL3	centromere protein V like 3
A0A0X1KG70	0.518072	OR4M2B	olfactory receptor family 4 subfamily M member 2B
A0A126GWB0	0.57157	OR2A2	olfactory receptor family 2 subfamily A member 2
A0A126GWI2	0.51989	OR2A25	olfactory receptor family 2 subfamily A member 25
A0A140G945	0.72742	CRYAA	crystallin alpha A
A0A140T8X8	0.571349	MUC21	mucin 21, cell surface associated
A0A140TA62	0.791572	LOC100653049	IF rod domain-containing protein
A0A191URJ7	0.54634	KIR2DL1	killer cell immunoglobulin like receptor, two Ig domains and long cytoplasmic tail 1
A0A1B0GTD5	0.3492	TEX49	Testis-expressed protein 49
A0A1B0GTE1	0.381488	CNTNAP3C	contactin associated protein family member 3C
A0A1B0GTH6	0.4487	CSNKA2IP	casein kinase 2 subunit alpha' interacting protein
A0A1B0GTH9	0.46653	LOC100505841	Zinc finger protein 474
A0A1B0GTI8	0.52134	TMEM272	transmembrane protein 272
A0A1B0GTK4	0.53109	FAM237A	family with sequence similarity 237 member A
A0A1B0GTL2	0.54809	C20orf204	chromosome 20 open reading frame 204
A0A1B0GTQ1	0.382385		Cytochrome P450 family 2 subfamily D member 6
A0A1B0GTS1	0.43652	HSFX4	heat shock transcription factor family, X-linked member 4
A0A1B0GTU1	0.33748	ZC3H11B	zinc finger CCCH-type containing 11B
A0A1B0GTW7	0.363941	CIROP	ciliated left-right organizer metallopeptidase
A0A1B0GTZ2	0.834973	CCDC196	coiled-coil domain containing 196
A0A1B0GUA7	0.65147	TEX51	testis expressed 51
A0A1B0GUJ8	0.42623	PNMA8C	PNMA family member 8C
A0A1B0GUL7	0.49714		Protein kinase domain-containing protein
A0A1B0GUS4	0.46866	UBE2L5	ubiquitin conjugating enzyme E2 L5
A0A1B0GUU1	0.370722	C17orf113	chromosome 17 open reading frame 113
A0A1B0GUV8	0.71983	LOC102723971	Lipocln_cytosolic_FA-bd_dom domain-containing protein
A0A1B0GUW6	0.87402	SPEM3	SPEM family member 3
A0A1B0GUX0	0.39861	ATP6V1FNB	Protein ATP6V1FNB (ATP6V1F neighbor gene protein)
A0A1B0GV03	0.655498	GOLGA6L7	golgin A6 family like 7
A0A1B0GV85	0.53106	REELD1	reeler domain containing 1
A0A1B0GVD1	0.53291	FAM237B	family with sequence similarity 237 member B
A0A1B0GVG4	0.69869	CCDC194	coiled-coil domain containing 194
A0A1B0GVH4	0.37791	PRSS51	serine protease 51
A0A1B0GVH7	0.35959	IQCM	IQ motif containing M
A0A1B0GVK7	0.55814	FAM240A	family with sequence similarity 240 member A
A0A1B0GVR7	0.6116	FAM240C	family with sequence similarity 240 member C
A0A1B0GVZ2	0.58057	FAM240B	family with sequence similarity 240 member B
A0A1B0GVZ9	0.61702	TMEM269	transmembrane protein 269
A0A1B0GW15	0.89668	LOC122394732	Transposase
A0A1B0GW35	0.41613	EXOC1L	exocyst complex component 1 like
A0A1B0GWH4	0.43666	HSFX3	heat shock transcription factor family, X-linked member 3
A0A1B0GWK0	0.487471	PVALEF	parvalbumin like EF-hand containing
A0A1B0GX31	0.5102	TRBV7-6	T cell receptor beta variable 7-6
A0A1B0GX49	0.51826	TRBV6-4	T cell receptor beta variable 6-4
A0A1B0GX51	0.51314	TRBV7-8	T cell receptor beta variable 7-8
A0A1B0GX56	0.53507	TRDV1	T cell receptor delta variable 1
A0A1B0GX68	0.52105	TRBV2	T cell receptor beta variable 2
A0A1B0GX78	0.51963	TRBV12-5	T cell receptor beta variable 12-5
A0A1B0GX95	0.52677	TRBV7-4	T cell receptor beta variable 7-4
A0A1B0GXF2	0.50635	TRBV7-2	T cell receptor beta variable 7-2
A0A1W2PN81	0.37147	CHRNA7	cholinergic receptor nicotinic alpha 7 subunit
A0A1W2PP81	0.43909	TAF11L5	TATA-box binding protein associated factor 11 like 5
A0A1W2PP97	0.41584	THSD8	thrombospondin type 1 domain containing 8
A0A1W2PPD8	0.43292	KDM4F	lysine demethylase 4F
A0A1W2PPE2	0.43131	TAF11L4	TATA-box binding protein associated factor 11 like 4
A0A1W2PPF3	0.597014	DUXB	double homeobox B
A0A1W2PPG7	0.48566	GNG14	G protein subunit gamma 14
A0A1W2PPH5	0.43716	TAF11L13	TATA-box binding protein associated factor 11 like 13
A0A1W2PPK0	0.52344	CPHXL2	cytoplasmic polyadenylated homeobox like 2
A0A1W2PPL8	0.4361	TAF11L14	TATA-box binding protein associated factor 11 like 14
A0A1W2PPM1	0.52659	CPHXL	cytoplasmic polyadenylated homeobox like
A0A1W2PPW3	0.43714	TAF11L12	TATA-box binding protein associated factor 11 like 12
A0A1W2PQ09	0.43363	TAF11L11	TATA-box binding protein associated factor 11 like 11
A0A1W2PQ27	0.52734	SSU72P7	RNA polymerase II subunit A C-terminal domain phosphatase SSU72 (CTD phosphatase SSU72) (EC 3.1.3.16)
A0A1W2PQ64	0.52741	SSU72P5	RNA polymerase II subunit A C-terminal domain phosphatase SSU72 (CTD phosphatase SSU72) (EC 3.1.3.16)
A0A1W2PQ72	0.639735	MSANTD7	Myb/SANT DNA binding domain containing 7
A0A1W2PQ73	0.54896	ERFL	ETS repressor factor like
A0A1W2PQC6	0.52751	SSU72P4	RNA polymerase II subunit A C-terminal domain phosphatase SSU72 (CTD phosphatase SSU72) (EC 3.1.3.16)
A0A1W2PQD8	0.5272	SSU72P2	RNA polymerase II subunit A C-terminal domain phosphatase SSU72 (CTD phosphatase SSU72) (EC 3.1.3.16)
A0A1W2PQF6	0.55514		KIR2DL2
A0A1W2PQJ5	0.52546	SSU72P3	RNA polymerase II subunit A C-terminal domain phosphatase SSU72 (CTD phosphatase SSU72) (EC 3.1.3.16)
A0A1W2PQL4	0.364859	ZNF722	zinc finger protein 722
A0A1W2PQM1	0.51874		Killer cell immunoglobulin-like receptor
A0A1W2PR19	0.77303	GSTT4	glutathione S-transferase theta 4
A0A1W2PR48	0.78314	TLE7	TLE family member 7
A0A1W2PR64	0.43592	TAF11L9	TATA-box binding protein associated factor 11 like 9
A0A1W2PR75	0.52299	SSU72P8	RNA polymerase II subunit A C-terminal domain phosphatase SSU72 (CTD phosphatase SSU72) (EC 3.1.3.16)
A0A1W2PR82	0.44954	PERCC1	proline and glutamate rich with coiled coil 1
A0A1W2PR95	0.42706	IGBP1P2	HCG1642624, isoform CRA_a (Immunoglobulin (CD79A)-binding protein 1 pseudogene 2)
A0A1W2PRG0	0.76576		glutathione transferase (EC 2.5.1.18)
A0A1W2PRN1	0.858888		GOLGA2L5 domain-containing protein
A0A1W2PRN6	0.43224	LINC02218	long intergenic non-protein coding RNA 2218
A0A1W2PRP0	0.5411	FOXL3	forkhead box L3
A0A1W2PRS3	0.55201		Killer cell immunoglobulin-like receptor KIR2DL1
A0A1W2PRV1	0.43811	TAF11L3	TATA-box binding protein associated factor 11 like 3
A0A1W2PS18	0.63295	PMIS2	PMIS2 transmembrane protein
A0A286YEU6	0.43348	OR1R1P	olfactory receptor family 1 subfamily R member 1 pseudogene
A0A286YF58	0.87784	TMEM271	transmembrane protein 271
A0A2R8Y422	0.472842	RPS27AP5	ribosomal protein S27a pseudogene 5
A0A2R8Y4L2	0.42951	HNRNPA1L3	heterogeneous nuclear ribonucleoprotein A1 like 3
A0A2R8Y4L6	0.54052	OR5D3P	olfactory receptor family 5 subfamily D member 3 pseudogene
A0A2R8Y4M4	0.65814	LOC122513141	RING-type domain-containing protein
A0A2R8Y4Y8	0.52449	OOSP4B	oocyte secreted protein family member 4B
A0A2R8Y5M8	0.60422	TOMT	transmembrane O-methyltransferase
A0A2R8Y619	0.44843	H2BK1	H2B.K variant histone 1
A0A2R8Y7D0	0.6593	TINCR	TINCR ubiquitin domain containing
A0A2R8YCY7	0.5516		KIR2DL2
A0A2R8YE69	0.654906		MIA SH3 domain ER export factor 2
A0A2R8YED5	0.55207	OR5BS1P	olfactory receptor family 5 subfamily BS member 1 pseudogene
A0A2R8YEG4	0.58041	OR2A1	olfactory receptor family 2 subfamily A member 1
A0A2R8YEH3	0.59198	LOC112268384	Olfactory receptor
A0A2R8YEV3	0.58695	OR2A42	olfactory receptor family 2 subfamily A member 42
A0A2R8YFL7	0.51002	OOSP4A	oocyte secreted protein family member 4A
A0A2R8YFM6	0.51619	OOSP3	oocyte secreted protein family member 3
A0A2R8YFR7	0.36667		DH domain-containing protein
A0A376A8Z9	0.54621	KIR2DS5	killer cell immunoglobulin like receptor, two Ig domains and short cytoplasmic tail 5
A0A3B3IRS2	0.46627	LOC647264	Keratin-associated protein 21-1-like
A0A3B3IRV3	0.41181	MCTS2	MCTS family member 2
A0A3B3IT33	0.393068	TRIM51G	tripartite motif-containing 51G
A0A3B3IT45	0.59176	OR51C1P	olfactory receptor family 51 subfamily C member 1 pseudogene
A0A3B3IT52	0.56489	MSANTD5	Myb/SANT DNA binding domain containing 5
A0A3B3IU63	0.44895	H2AL3	H2A.L variant histone 3
A0A494C071	0.441385	PWWP4	PWWP domain containing 4
A0A494C086	0.46178	SPDYE21	speedy/RINGO cell cycle regulator family member E21
A0A494C0I6	0.86234		Secreted protein
A0A494C0N9	0.77245	FAM246B	family with sequence similarity 246 member B
A0A494C0Y3	0.82332	FAM246A	family with sequence similarity 246 member A
A0A494C0Z2	0.45883	SPDYE13	speedy/RINGO cell cycle regulator family member E13
A0A494C103	0.56762	LOC112577516	CUB domain-containing protein
A0A494C191	0.46154	SPDYE9	speedy/RINGO cell cycle regulator family member E9
A0A494C1R9	0.39061	TSPY9	testis specific protein Y-linked 9
A0A499FJF3	0.36579		Rho-GAP domain-containing protein
A0A4W9AIG4	0.60748	OR2A14	olfactory receptor family 2 subfamily A member 14
A0A539	0.51233	TRBV4-2	T cell receptor beta variable 4-2
A0A576	0.50793	TRBV3-1	T cell receptor beta variable 3-1
A0A577	0.50853	TRBV4-1	T cell receptor beta variable 4-1
A0A578	0.52784	TRBV5-1	T cell receptor beta variable 5-1
A0A584	0.51537	TRBV11-2	T cell receptor beta variable 11-2
A0A589	0.5087	TRBV4-3	T cell receptor beta variable 4-3
A0A597	0.52647	TRBV5-5	T cell receptor beta variable 5-5
A0A599	0.52844	TRBV5-6	T cell receptor beta variable 5-6
A0A5A2	0.52362	TRBV5-8	T cell receptor beta variable 5-8
A0A5A6	0.51091	TRBV11-3	T cell receptor beta variable 11-3
A0A5B0	0.51094	TRBV14	T cell receptor beta variable 14
A0A5B6	0.52121	TRBV28	T cell receptor beta variable 28
A0A5B7	0.54694	TRBV29-1	T cell receptor beta variable 29-1
A0A5B9	0.52982	TRBC2	T cell receptor beta constant 2
A0A5F9Z9Y6	0.55074		KIR2DL2
A0A5F9ZH88	0.55108		KIR2DL1
A0A5F9ZHS7	0.79682	NFILZ	NFIL3 like basic leucine zipper
A0A5K1VDZ0	0.54352	KIR2DL1	killer cell immunoglobulin like receptor, two Ig domains and long cytoplasmic tail 1
A0A5S8K742	0.37676
A0A7I2V3D3	0.737
A0A7I2V3R4	0.40973	LOC122319436	RING-type domain-containing protein
A0AUZ9	0.90427	KANSL1L	KAT8 regulatory NSL complex subunit 1 like
A0AV02	0.85021	SLC12A8	solute carrier family 12 member 8
A0AV96	0.572588	RBM47	RNA binding motif protein 47
A0AVF1	0.51669	TTC26	Intraflagellar transport protein 56 (Tetratricopeptide repeat protein 26) (TPR repeat protein 26)
A0AVI2	0.371288	FER1L5	fer-1 like family member 5
A0AVI4	0.37001	TMEM129	transmembrane protein 129, E3 ubiquitin ligase
A0AVK6	0.39769	E2F8	E2F transcription factor 8
A0AVT1	0.58259	UBA6	ubiquitin like modifier activating enzyme 6
A0FGR8	0.412833	ESYT2	extended synaptotagmin 2
A0FGR9	0.434058	ESYT3	extended synaptotagmin 3
A0JD32	0.51723	TRAV38-2DV8	T cell receptor alpha variable 38-2/delta variable 8
A0JD36	0.56137	TRDV2	T cell receptor delta variable 2
A0JD37	0.56827	TRDV3	T cell receptor delta variable 3
A0JLT2	0.34216	MED19	mediator complex subunit 19
A0JNW5	0.40516	BLTP3B	bridge-like lipid transfer protein family member 3B
A0JP26	0.753212	POTEB3	POTE ankyrin domain family member B3
A0M8Q6	0.61404	IGLC7	immunoglobulin lambda constant 7
A0MZ66	0.757971	SHTN1	shootin 1
A0PG75	0.48	PLSCR5	phospholipid scramblase family member 5
A0PJE2	0.68182	DHRS12	dehydrogenase/reductase 12
A0PJK1	0.80107	SLC5A10	solute carrier family 5 member 10
A0PJW6	0.71069	TMEM223	transmembrane protein 223
A0PJX0	0.35049	CIB4	calcium and integrin binding family member 4
A0PJX2	0.47454	TLDC2	TBC/LysM-associated domain containing 2
A0PJX4	0.35662	SHISA3	shisa family member 3
A0PJX8	0.44743	TMEM82	transmembrane protein 82
A0PJY2	0.355927	FEZF1	FEZ family zinc finger 1
A0PJZ0	0.58443	ANKRD20A5P	ankyrin repeat domain 20 family member A5, pseudogene
A0PJZ3	0.66313	GXYLT2	glucoside xylosyltransferase 2
A0PK00	0.40089	TMEM120B	transmembrane protein 120B
A0PK05	0.66509	TMEM72	transmembrane protein 72
A0PK11	0.49139	CLRN2	clarin 2
A0ZSE6	0.47764	TMEM30CP	transmembrane protein 30C, pseudogene
A1A4S6	0.52612	ARHGAP10	Rho GTPase activating protein 10
A1A4V9	0.46027	CFAP119	cilia and flagella associated protein 119
A1A4Y4	0.60907	IRGM	immunity related GTPase M
A1A519	0.46968	FAM170A	family with sequence similarity 170 member A
A1A5B4	0.26868	ANO9	anoctamin 9
A1A5C7	0.80057	SLC22A23	solute carrier family 22 member 23
A1A5D9	0.661624	BICDL2	BICD family like cargo adaptor 2
A1IGU5	0.534218	ARHGEF37	Rho guanine nucleotide exchange factor 37
A1KZ92	0.41395	PXDNL	peroxidasin like
A1L020	0.604265	MEX3A	mex-3 RNA binding family member A
A1L0T0	0.83934	ILVBL	ilvB acetolactate synthase like
A1L157	0.502	TSPAN11	tetraspanin 11
A1L162	0.68374	ERICH2	glutamate rich 2
A1L167	0.46135	UBE2QL1	ubiquitin conjugating enzyme E2 Q family like 1
A1L168	0.8582	C20orf202	chromosome 20 open reading frame 202
A1L188	0.52722	NDUFAF8	NADH:ubiquinone oxidoreductase complex assembly factor 8
A1L1A6	0.63106	IGSF23	immunoglobulin superfamily member 23
A1L390	0.38497	PLEKHG3	pleckstrin homology and RhoGEF domain containing G3
A1L3X0	0.46609	ELOVL7	ELOVL fatty acid elongase 7
A1L443	0.469319	NUTM2F	NUT family member 2F
A1L453	0.70057	PRSS38	serine protease 38
A1L4H1	0.433728	SSC5D	scavenger receptor cysteine rich family member with 5 domains
A1L4K1	0.485768	FSD2	fibronectin type III and SPRY domain containing 2
A1L4L8	0.39869	PLAC8L1	PLAC8 like 1
A1X283	0.592005	SH3PXD2B	SH3 and PX domains 2B
A1XBS5	0.55042	CIBAR1	CBY1 interacting BAR domain containing 1
A1YPR0	0.378665	ZBTB7C	zinc finger and BTB domain containing 7C
A1Z1Q3	0.75679	MACROD2	mono-ADP ribosylhydrolase 2
A2A288	0.49274	ZC3H12D	zinc finger CCCH-type containing 12D
A2A2Y4	0.371822	FRMD3	FERM domain containing 3
A2A2Z9	0.70688	ANKRD18B	ankyrin repeat domain 18B
A2A368	0.39937	MAGEB16	MAGE family member B16
A2A3K4	0.32833	PTPDC1	protein tyrosine phosphatase domain containing 1
A2A3L6	0.57735	TTC24	tetratricopeptide repeat domain 24
A2A3N6	0.534823	PIPSL	PIP5K1A and PSMD4 like (pseudogene)
A2CJ06	0.459443	DYTN	dystrotelin
A2IDD5	0.865718	CCDC78	coiled-coil domain containing 78
A2NJV5	0.55072	IGKV2-29	immunoglobulin kappa variable 2-29
A2PYH4	0.56959	HFM1	helicase for meiosis 1
A2RRD8	0.398797	ZNF320	zinc finger protein 320
A2RRH5	0.745472	WDR27	WD repeat domain 27
A2RRP1	0.488176	NBAS	NBAS subunit of NRZ tethering complex
A2RTX5	0.884761	TARS3	threonyl-tRNA synthetase 3
A2RTY3	0.55703	HEATR9	HEAT repeat containing 9
A2RU14	0.63715	TMEM218	transmembrane protein 218
A2RU30	0.5397	TESPA1	thymocyte expressed, positive selection associated 1
A2RU48	0.48042	SMCO3	single-pass membrane protein with coiled-coil domains 3
A2RU49	0.71151	HYKK	hydroxylysine kinase
A2RU54	0.60469	HMX2	H6 family homeobox 2
A2RU67	0.62077	FAM234B	family with sequence similarity 234 member B
A2RUB1	0.49394	MEIOC	meiosis specific with coiled-coil domain
A2RUB6	0.778414	CCDC66	coiled-coil domain containing 66
A2RUC4	0.45478	TYW5	tRNA-yW synthesizing protein 5
A2RUH7	0.556461	MYBPHL	myosin binding protein H like
A2RUR9	0.733657	CCDC144A	coiled-coil domain containing 144A
A2RUS2	0.459939	DENND3	DENN domain containing 3
A2RUU4	0.33149	CLPSL1	colipase like 1
A2VCK2	0.549073	DCDC2B	doublecortin domain containing 2B
A2VDF0	0.8879	FUOM	fucose mutarotase
A2VDJ0	0.508819	TMEM131L	transmembrane 131 like
A3KFT3	0.5684	OR2M5	olfactory receptor family 2 subfamily M member 5
A3KMH1	0.542493	VWA8	von Willebrand factor A domain containing 8
A3KN83	0.44626	SBNO1	strawberry notch homolog 1
A3QJZ6	0.44936	PRAMEF22	PRAME family member 22
A3QJZ7	0.45462	PRAMEF27	PRAME family member 27
A4D0S4	0.410925	LAMB4	laminin subunit beta 4
A4D0V7	0.461449	CPED1	cadherin like and PC-esterase domain containing 1
A4D126	0.54544	CRPPA	CDP-L-ribitol pyrophosphorylase A
A4D161	0.34755	FAM221A	family with sequence similarity 221 member A
A4D1B5	0.351664	GSAP	gamma-secretase activating protein
A4D1E1	0.6769	ZNF804B	zinc finger protein 804B
A4D1E9	0.690192	GTPBP10	GTP binding protein 10
A4D1F6	0.422856	LRRD1	leucine rich repeats and death domain containing 1
A4D1P6	0.685407	WDR91	WD repeat domain 91
A4D1S0	0.40473	KLRG2	killer cell lectin like receptor G2
A4D1S5	0.71009	RAB19	RAB19, member RAS oncogene family
A4D1T9	0.69209	PRSS37	serine protease 37
A4D1U4	0.32947	DENND11	DENN domain containing 11
A4D1Z8	0.45581	GRIFIN	galectin-related inter-fiber protein
A4D256	0.3601	CDC14C	cell division cycle 14C
A4D2B0	0.68676	MBLAC1	metallo-beta-lactamase domain containing 1
A4D2B8	0.72068	PMS2P1	PMS1 homolog 2, mismatch repair system component pseudogene 1
A4D2G3	0.57279	OR2A25	olfactory receptor family 2 subfamily A member 25
A4D2H0	0.677606	CTAGE15	CTAGE family member 15
A4D2P6	0.474448	GRID2IP	Grid2 interacting protein
A4FU01	0.3377	MTMR11	myotubularin related protein 11
A4FU28	0.684829	CTAGE9	CTAGE family member 9
A4FU49	0.773565	SH3D21	SH3 domain containing 21
A4FU69	0.240547	EFCAB5	EF-hand calcium binding domain 5
A4GXA9	0.433593	EME2	essential meiotic structure-specific endonuclease subunit 2
A4IF30	0.81503	SLC35F4	solute carrier family 35 member F4
A4QMS7	0.33756	C5orf49	Uncharacterized protein C5orf49
A4QPB2	0.60954	LRP5L	LDL receptor related protein 5 like (pseudogene)
A4QPH2	0.495001	PI4KAP2	phosphatidylinositol 4-kinase alpha pseudogene 2
A5A3E0	0.74984	POTEF	POTE ankyrin domain family member F
A5D6W6	0.51577	FITM1	fat storage inducing transmembrane protein 1
A5D8T8	0.369686	CLEC18A	C-type lectin domain family 18 member A
A5D8V6	0.4984	VPS37C	VPS37C subunit of ESCRT-I
A5D8V7	0.605519	ODAD3	outer dynein arm docking complex subunit 3
A5D8W1	0.37137	CFAP69	cilia and flagella associated protein 69
A5LHX3	0.7464	PSMB11	proteasome subunit beta 11
A5PKW4	0.413434	PSD	pleckstrin and Sec7 domain containing
A5PLK6	0.478732	RGSL1	regulator of G protein signaling like 1
A5PLL1	0.5789	ANKRD34B	ankyrin repeat domain 34B
A5PLL7	0.35995	PEDS1	plasmanylethanolamine desaturase 1
A5PLN9	0.491074	TRAPPC13	trafficking protein particle complex subunit 13
A5X5Y0	0.38519	HTR3E	5-hydroxytryptamine receptor 3E
A5YKK6	0.46393	CNOT1	CCR4-NOT transcription complex subunit 1
A5YM72	0.43851	CARNS1	carnosine synthase 1
A6BM72	0.330086	MEGF11	multiple EGF like domains 11
A6H8M9	0.539572	CDHR4	cadherin related family member 4
A6H8Y1	0.47428	BDP1	B double prime 1, subunit of RNA polymerase III transcription initiation factor IIIB
A6H8Z2	0.3647	FAM221B	family with sequence similarity 221 member B
A6NC42	0.59111	DPPA5	developmental pluripotency associated 5
A6NC51	0.55835	TMEM150B	transmembrane protein 150B
A6NC57	0.709883	ANKRD62	ankyrin repeat domain 62
A6NC78	0.757901	GOLGA8IP	golgin A8 family member I, pseudogene
A6NC86	0.36091	PINLYP	phospholipase A2 inhibitor and LY6/PLAUR domain containing
A6NC97	0.54628	FAM172BP	Putative protein FAM172B (FAM172B pseudogene)
A6NC98	0.549189	CCDC88B	coiled-coil domain containing 88B
A6NCC3	0.782767	GOLGA8O	golgin A8 family member O
A6NCE7	0.4506	MAP1LC3B2	microtubule associated protein 1 light chain 3 beta 2
A6NCF5	0.630813	KLHL33	kelch like family member 33
A6NCF6	0.41396	MAGEA13P	MAGE family member A13, pseudogene
A6NCI4	0.49069	VWA3A	von Willebrand factor A domain containing 3A
A6NCK2	0.376524	TRIM43B	tripartite motif containing 43B
A6NCL1	0.87068	GMNC	geminin coiled-coil domain containing
A6NCL2	0.33974	LRCOL1	leucine rich colipase like 1
A6NCL7	0.6443	ANKRD33B	ankyrin repeat domain 33B
A6NCM1	0.37255	IQCA1L	IQ motif containing with AAA domain 1 like
A6NCN2	0.815703	KRT87P	keratin 87, pseudogene
A6NCN8	0.59954	TEX52	testis expressed 52
A6NCQ9	0.40669	RNF222	ring finger protein 222
A6NCS4	0.59561	NKX2-6	NK2 homeobox 6
A6NCS6	0.57818	C2orf72	chromosome 2 open reading frame 72
A6NCV1	0.55019	OR6C74	olfactory receptor family 6 subfamily C member 74
A6NCW0	0.35802	USP17L3	ubiquitin specific peptidase 17 like family member 3
A6NCW7	0.3583	USP17L4	ubiquitin specific peptidase 17 like family member 4
A6ND01	0.37093	IZUMO1R	IZUMO1 receptor, JUNO
A6ND36	0.452628	FAM83G	family with sequence similarity 83 member G
A6ND48	0.5879	OR14I1	olfactory receptor family 14 subfamily I member 1
A6ND91	0.59494	ASPDH	aspartate dehydrogenase domain containing
A6NDA9	0.513403	LRIT2	leucine rich repeat, Ig-like and transmembrane domains 2
A6NDB9	0.7224	PALM3	paralemmin 3
A6NDE4	0.6616	RBMY1B	RNA binding motif protein Y-linked family 1 member B
A6NDG6	0.75174	PGP	phosphoglycolate phosphatase
A6NDH6	0.54118	OR5H15	olfactory receptor family 5 subfamily H member 15
A6NDI0	0.33729	TRIM49B	tripartite motif containing 49B
A6NDK9	0.67966	GOLGA6C	golgin A6 family member C
A6NDL7	0.71769	METTL21EP	methyltransferase like 21E, pseudogene
A6NDL8	0.53868	OR6C68	olfactory receptor family 6 subfamily C member 68
A6NDN3	0.68353	GOLGA6B	golgin A6 family member B
A6NDN8	0.65233		Putative ubiquitin-like protein FUBI-like protein ENSP00000310146
A6NDP7	0.42844	MYADML2	myeloid associated differentiation marker like 2
A6NDR6	0.56282	MEIS3P1	Meis homeobox 3 pseudogene 1
A6NDS4	0.34756	TBC1D3B	TBC1 domain family member 3B
A6NDU8	0.45474	RIMOC1	RAB7A interacting MON1-CCZ1 complex subunit 1
A6NDV4	0.571911	TMEM8B	transmembrane protein 8B
A6NDX5	0.410091	ZNF840P	zinc finger protein 840, pseudogene
A6NDY0	0.6066	PABPN1L	PABPN1 like, cytoplasmic
A6NE01	0.643172	FAM186A	family with sequence similarity 186 member A
A6NE02	0.36716	BTBD17	BTB domain containing 17
A6NE52	0.589365	WDR97	WD repeat domain 97
A6NEC2	0.44871	NPEPPSL1	Puromycin-sensitive aminopeptidase-like protein (EC 3.4.11.-)
A6NED2	0.53774	RCCD1	RCC1 domain containing 1
A6NEE1	0.508225	PLEKHD1	pleckstrin homology and coiled-coil domain containing D1
A6NEF3	0.823672	GOLGA6L4	golgin A6 family like 4
A6NEH6	0.91042	TMEM247	transmembrane protein 247
A6NEK1	0.40065	ARRDC5	arrestin domain containing 5
A6NEL2	0.545844	SOWAHB	sosondowah ankyrin repeat domain family member B
A6NEM1	0.881021	GOLGA6L9	golgin A6 family like 9
A6NEN9	0.43481	CXorf65	chromosome X open reading frame 65
A6NEQ0	0.65995	RBMY1E	RNA binding motif protein Y-linked family 1 member E
A6NER0	0.34988	TBC1D3F	TBC1 domain family member 3F
A6NES4	0.453844	MROH2A	maestro heat like repeat family member 2A
A6NET4	0.50467	OR5K3	olfactory receptor family 5 subfamily K member 3
A6NEV1	0.4322	PRR23A	proline rich 23A
A6NEY3	0.805939	GOLGA6L3	Putative golgin subfamily A member 6-like protein 3
A6NEY8	0.79941	PRORSD1P	prolyl-tRNA synthetase associated domain containing 1, pseudogene
A6NF34	0.55801	ANTXRL	ANTXR like
A6NF36	0.65608	CCDC182	coiled-coil domain containing 182
A6NF89	0.54809	OR6C6	olfactory receptor family 6 subfamily C member 6
A6NFA1	0.58403	TRABD2B	TraB domain containing 2B
A6NFC5	0.68896	TMEM235	transmembrane protein 235
A6NFC9	0.54544	OR2W5P	olfactory receptor family 2 subfamily W member 5 pseudogene
A6NFD8	0.582556	HELT	helt bHLH transcription factor
A6NFE2	0.86969	SMCO2	single-pass membrane protein with coiled-coil domains 2
A6NFE3	0.520815	EFCAB10	EF-hand calcium binding domain 10
A6NFF2	0.59168	NAP1L6P	nucleosome assembly protein 1 like 6, pseudogene
A6NFH5	0.52301	FABP12	fatty acid binding protein 12
A6NFI3	0.39983	ZNF316	zinc finger protein 316
A6NFK2	0.37433	GRXCR2	glutaredoxin and cysteine rich domain containing 2
A6NFN3	0.65211	RBFOX3	RNA binding fox-1 homolog 3
A6NFN9	0.446632	ANKUB1	ankyrin repeat and ubiquitin domain containing 1
A6NFQ2	0.45852	TCAF2	TRPM8 channel associated factor 2
A6NFQ7	0.57986	DPRX	divergent-paired related homeobox
A6NFT4	0.41341	CFAP73	cilia and flagella associated protein 73
A6NFU0	0.34724	FAM187A	family with sequence similarity 187 member A
A6NFU8	0.55806	PGPEP1L	pyroglutamyl-peptidase I like
A6NFX1	0.87803	MFSD2B	MFSD2 lysolipid transporter B, sphingolipid
A6NFY4	0.395015	NEMP2	nuclear envelope integral membrane protein 2
A6NFY7	0.5799	SDHAF1	succinate dehydrogenase complex assembly factor 1
A6NG13	0.651407	MGAT4D	MGAT4 family member D
A6NGA9	0.55721	TMEM202	transmembrane protein 202
A6NGB0	0.723994	TMEM191C	transmembrane protein 191C
A6NGB7	0.58108	TMEM221	transmembrane protein 221
A6NGC4	0.50403	TLCD2	TLC domain containing 2
A6NGD5	0.351597	ZSCAN5C	zinc finger and SCAN domain containing 5C
A6NGE4	0.67126	DCAF8L1	DDB1 and CUL4 associated factor 8 like 1
A6NGE7	0.37077	URAD	ureidoimidazoline (2-oxo-4-hydroxy-4-carboxy-5-) decarboxylase
A6NGG8	0.809185	PCARE	photoreceptor cilium actin regulator
A6NGH7	0.6504	CCDC160	coiled-coil domain containing 160
A6NGH8	0.57065	ANKRD61	ankyrin repeat domain 61
A6NGJ6	0.388505	TRIM64	tripartite motif containing 64
A6NGN4	0.44397	PRAMEF25	PRAME family member 25
A6NGN9	0.47836	IGLON5	IgLON family member 5
A6NGQ2	0.56964	OOEP	oocyte expressed protein
A6NGR9	0.44195	MROH6	maestro heat like repeat family member 6
A6NGS2	0.66849	ERICH4	glutamate rich 4
A6NGU5	0.92833	GGT3P	gamma-glutamyltransferase 3 pseudogene
A6NGW2	0.439334	STRCP1	stereocilin pseudogene 1
A6NGY1	0.61518	FRG2C	FSHD region gene 2 family member C
A6NGY3	0.83669	C5orf52	chromosome 5 open reading frame 52
A6NGY5	0.5374	OR51F1	olfactory receptor family 51 subfamily F member 1
A6NH00	0.56177	OR2T8	olfactory receptor family 2 subfamily T member 8
A6NH11	0.42328	GLTPD2	glycolipid transfer protein domain containing 2
A6NH21	0.37456	SERINC4	serine incorporator 4
A6NH52	0.51688	TVP23A	trans-golgi network vesicle protein 23 homolog A
A6NH57	0.76309	ARL5C	ADP ribosylation factor like GTPase 5C
A6NHA9	0.55607	OR4C46	olfactory receptor family 4 subfamily C member 46
A6NHC0	0.337453	CAPN8	calpain 8
A6NHG4	0.52384	DDTL	D-dopachrome tautomerase like
A6NHG9	0.5393	OR5H14	olfactory receptor family 5 subfamily H member 14
A6NHJ4	0.37961	ZNF860	zinc finger protein 860
A6NHL2	0.60508	TUBAL3	tubulin alpha like 3
A6NHM9	0.3557	MOXD2P	monooxygenase DBH like 2, pseudogene
A6NHN0	0.50638	OTOL1	otolin 1
A6NHP3	0.45509	SPDYE2B	speedy/RINGO cell cycle regulator family member E2B
A6NHQ2	0.61163	FBLL1	fibrillarin like 1
A6NHR9	0.579998	SMCHD1	structural maintenance of chromosomes flexible hinge domain containing 1
A6NHS7	0.40176	MANSC4	MANSC domain containing 4
A6NHT5	0.60437	HMX3	H6 family homeobox 3
A6NHX0	0.40777	CASTOR2	cytosolic arginine sensor for mTORC1 subunit 2
A6NHY2	0.45917	ANKDD1B	ankyrin repeat and death domain containing 1B
A6NHZ5	0.43681	LRRC14B	leucine rich repeat containing 14B
A6NI03	0.388486	TRIM64B	tripartite motif containing 64B
A6NI15	0.53748	MSGN1	mesogenin 1
A6NI28	0.509204	ARHGAP42	Rho GTPase activating protein 42
A6NI47	0.7206	POTEM	POTE ankyrin domain family member M
A6NI56	0.691276	CCDC154	coiled-coil domain containing 154
A6NI61	0.69928	MYMK	myomaker, myoblast fusion factor
A6NI72	0.391055	NCF1B	neutrophil cytosolic factor 1B (pseudogene)
A6NI73	0.5306	LILRA5	leukocyte immunoglobulin like receptor A5
A6NI79	0.785251	CCDC69	coiled-coil domain containing 69
A6NI86	0.805194	GOLGA6L10	golgin A6 family like 10
A6NI87	0.88131	CBY3	chibby family member 3
A6NIE6	0.39976	RRN3P2	RRN3 pseudogene 2
A6NIE9	0.73027	PRSS29P	serine protease 29, pseudogene
A6NIH7	0.51648	UNC119B	unc-119 lipid binding chaperone B
A6NIJ9	0.55107	OR6C70	olfactory receptor family 6 subfamily C member 70
A6NIK2	0.75406	LRRC10B	leucine rich repeat containing 10B
A6NIM6	0.75677	SLC15A5	solute carrier family 15 member 5
A6NIN4	0.39082	RNF227	ring finger protein 227
A6NIR3	0.428918	AGAP5	ArfGAP with GTPase domain, ankyrin repeat and PH domain 5
A6NIV6	0.47827	LRRIQ4	leucine rich repeats and IQ motif containing 4
A6NIX2	0.396977	WTIP	WT1 interacting protein
A6NIY4	0.45894	SPDYE5	speedy/RINGO cell cycle regulator family member E5
A6NIZ1	0.68551		Ras-related protein Rap-1b-like protein
A6NJ46	0.6093	NKX6-3	NK6 homeobox 3
A6NJ64	0.89567	NPIPB2	nuclear pore complex interacting protein family member B2
A6NJ78	0.88728	METTL15	methyltransferase 15, mitochondrial 12S rRNA N4-cytidine
A6NJ88	0.48047	SAGE2P	sarcoma antigen 2, pseudogene
A6NJG2	0.54576	SOWAHD	sosondowah ankyrin repeat domain family member D
A6NJG6	0.60462	ARGFX	arginine-fifty homeobox
A6NJI9	0.52295	LRRC72	leucine rich repeat containing 72
A6NJJ6	0.40718	C19orf67	chromosome 19 open reading frame 67
A6NJL1	0.350481	ZSCAN5B	zinc finger and SCAN domain containing 5B
A6NJR5	0.44128		Putative speedy protein-like protein 3
A6NJT0	0.58688	UNCX	UNC homeobox
A6NJV1	0.4391	FAM166C	Protein FAM166C (Family with sequence similarity 166 member C)
A6NJW4	0.48343	LRRC3C	leucine rich repeat containing 3C
A6NJW9	0.55738	CD8B2	CD8B family member 2
A6NJY1	0.52651	SLC9B1P1	solute carrier family 9 member B1 pseudogene 1
A6NJY4	0.75732	TMEM238L	transmembrane protein 238 like
A6NJZ3	0.58153	OR6C65	olfactory receptor family 6 subfamily C member 65
A6NJZ7	0.66675	RIMBP3C	RIMS binding protein 3C
A6NK02	0.501235	TRIM75	tripartite motif containing 75
A6NK06	0.83778	ACOD1	aconitate decarboxylase 1
A6NK44	0.69967	GLOD5	glyoxalase domain containing 5
A6NK53	0.348465	ZNF233	zinc finger protein 233
A6NK58	0.86144	LIPT2	lipoyl(octanoyl) transferase 2
A6NK59	0.45648	ASB14	ankyrin repeat and SOCS box containing 14
A6NK75	0.376164	ZNF98	zinc finger protein 98
A6NK89	0.715475	RASSF10	Ras association domain family member 10
A6NK97	0.78134	SLC22A20P	solute carrier family 22 member 20, pseudogene
A6NKB5	0.417363	PCNX2	pecanex 2
A6NKC9	0.42139	SH2D7	SH2 domain containing 7
A6NKD2	0.38994	TSPY2	testis specific protein Y-linked 2
A6NKD9	0.70397	CCDC85C	coiled-coil domain containing 85C
A6NKF1	0.40901	SAC3D1	SAC3 domain containing 1
A6NKF2	0.45495	ARID3C	AT-rich interaction domain 3C
A6NKG5	0.39083	RTL1	retrotransposon Gag like 1
A6NKH3	0.37956	RPL37AP8	ribosomal protein L37a pseudogene 8
A6NKK0	0.53363	OR5H1	olfactory receptor family 5 subfamily H member 1
A6NKL6	0.73915	TMEM200C	transmembrane protein 200C
A6NKP2	0.86475	SDR42E2	short chain dehydrogenase/reductase family 42E, member 2
A6NKQ9	0.35177	CGB1	chorionic gonadotropin subunit beta 1
A6NKT7	0.443527	RGPD3	RANBP2 like and GRIP domain containing 3
A6NKU9	0.44627	SPDYE3	speedy/RINGO cell cycle regulator family member E3
A6NKW6	0.3459	SHISAL2B	shisa like 2B
A6NKX4	0.81684	SLC22A31	solute carrier family 22 member 31
A6NL08	0.52981	OR6C75	olfactory receptor family 6 subfamily C member 75
A6NL26	0.53794	OR5B21	olfactory receptor family 5 subfamily B member 21
A6NL88	0.33735	SHISA7	shisa family member 7
A6NL99	0.9368	AQP7P3	aquaporin 7 pseudogene 3
A6NLC8	0.43232	TAF11L2	TATA-box binding protein associated factor 11 like 2
A6NLF2	0.506043
A6NLI5	0.401904	TRIM64C	tripartite motif containing 64C
A6NLJ0	0.50545	C2CD4B	C2 calcium dependent domain containing 4B
A6NLP5	0.73478	TTC36	tetratricopeptide repeat domain 36
A6NLU0	0.36364	RFPL4A	ret finger protein like 4A
A6NLU5	0.61102	VSTM2B	V-set and transmembrane domain containing 2B
A6NLW8	0.591431	DUXA	double homeobox A
A6NLX3	0.4486	SPDYE4	speedy/RINGO cell cycle regulator family member E4
A6NM03	0.57757	OR2AG2	olfactory receptor family 2 subfamily AG member 2
A6NM10	0.65307	AQP12B	aquaporin 12B
A6NM11	0.617019	LRRC37A2	leucine rich repeat containing 37 member A2
A6NM28	0.374998	ZFP92	ZFP92 zinc finger protein
A6NM36	0.72278	LRRC30	leucine rich repeat containing 30
A6NM43	0.63848	CCT8L1P	chaperonin containing TCP1 subunit 8 like 1, pseudogene
A6NM45	0.53827	CLDN24	claudin 24
A6NM62	0.70341	LRRC53	leucine rich repeat containing 53
A6NM76	0.55285	OR6C76	olfactory receptor family 6 subfamily C member 76
A6NMB1	0.464775	SIGLEC16	sialic acid binding Ig like lectin 16
A6NMB9	0.73509	FIGNL2	fidgetin like 2
A6NMD0	0.61815	IFITM10	interferon induced transmembrane protein 10
A6NMD2	0.784686	GOLGA8J	golgin A8 family member J
A6NMK7	0.330847	CPSF4L	cleavage and polyadenylation specific factor 4 like
A6NMK8	0.68566	INSYN2B	inhibitory synaptic factor family member 2B
A6NML5	0.65352	TMEM212	transmembrane protein 212
A6NMN3	0.38024	FAM170B	family with sequence similarity 170 member B
A6NMS3	0.52647	OR5K4	olfactory receptor family 5 subfamily K member 4
A6NMS7	0.62244	LRRC37A	leucine rich repeat containing 37A
A6NMT0	0.60673	DBX1	developing brain homeobox 1
A6NMU1	0.51816	OR52A4P	olfactory receptor family 52 subfamily A member 4 pseudogene
A6NMX2	0.47003	EIF4E1B	eukaryotic translation initiation factor 4E family member 1B
A6NMY6	0.38968	ANXA2P2	annexin A2 pseudogene 2
A6NMZ2	0.44855	SNTN	sentan, cilia apical structure protein
A6NMZ5	0.49572	OR4C45	olfactory receptor family 4 subfamily C member 45 (gene/pseudogene)
A6NMZ7	0.521909	COL6A6	collagen type VI alpha 6 chain
A6NN14	0.423759	ZNF729	zinc finger protein 729
A6NN73	0.805257	GOLGA8CP	golgin A8 family member C, pseudogene
A6NN90	0.65167	C2orf81	chromosome 2 open reading frame 81
A6NN92	0.5142	GJE1	gap junction protein epsilon 1
A6NNA2	0.6545	SRRM3	serine/arginine repetitive matrix 3
A6NNA5	0.59173	DRGX	dorsal root ganglia homeobox
A6NNB3	0.80813	IFITM5	interferon induced transmembrane protein 5
A6NND4	0.55964	OR2AT4	olfactory receptor family 2 subfamily AT member 4
A6NNE9	0.59197	MARCHF11	membrane associated ring-CH-type finger 11
A6NNF4	0.397337	ZNF726	zinc finger protein 726
A6NNL0	0.443191	NUTM2B	NUT family member 2B
A6NNL5	0.39067	C15orf61	chromosome 15 open reading frame 61
A6NNM3	0.622272	RIMBP3B	RIMS binding protein 3B
A6NNM8	0.54451	TTLL13	tubulin tyrosine ligase like 13
A6NNN8	0.82472	SLC38A8	solute carrier family 38 member 8
A6NNP5	0.76262	CCDC169	coiled-coil domain containing 169
A6NNS2	0.77274	DHRS7C	dehydrogenase/reductase 7C
A6NNT2	0.850605	C16orf96	chromosome 16 open reading frame 96
A6NNV3	0.44399	SPDYE16	speedy/RINGO cell cycle regulator family member E16
A6NNW6	0.76103	ENO4	enolase 4
A6NNX1	0.47614	RIIAD1	regulatory subunit of type II PKA R-subunit domain containing 1
A6NNY8	0.35026	USP27X	ubiquitin specific peptidase 27 X-linked
A6NNZ2	0.61601	TUBB8B	tubulin beta 8B
A6NP11	0.38644	ZNF716	zinc finger protein 716
A6NP61	0.37471	ZAR1L	zygote arrest 1 like
A6PVC2	0.48546	TTLL8	tubulin tyrosine ligase like 8
A6PVI3	0.4123	NCBP2L	nuclear cap binding protein subunit 2 like
A6PVS8	0.606887	LRRIQ3	leucine rich repeats and IQ motif containing 3
A6QL63	0.362318	ABTB3	ankyrin repeat and BTB domain containing 3
A6QL64	0.737532	ANKRD36	ankyrin repeat domain 36
A6XGL0	0.51139	YJEFN3	YjeF N-terminal domain containing 3
A7E2F4	0.75402	GOLGA8A	golgin A8 family member A
A7E2S9	0.7406	ANKRD30BL	ankyrin repeat domain 30B like
A7E2U8	0.41928	C4orf47	UPF0602 protein C4orf47
A7E2V4	0.384882	ZSWIM8	zinc finger SWIM-type containing 8
A7E2Y1	0.469472	MYH7B	myosin heavy chain 7B
A7KAX9	0.459445	ARHGAP32	Rho GTPase activating protein 32
A7MBM2	0.46359	DISP2	dispatched RND transporter family member 2
A7MCY6	0.821936	TBKBP1	TBK1 binding protein 1
A7XYQ1	0.542837	SOBP	sine oculis binding protein homolog
A8K0R7	0.40896	ZNF839	zinc finger protein 839
A8K0S8	0.55535	MEIS3P2	Meis homeobox 3 pseudogene 2
A8K0Z3	0.48184	WASHC1	WASH complex subunit 1
A8K2U0	0.722388	A2ML1	alpha-2-macroglobulin like 1
A8K4G0	0.60045	CD300LB	CD300 molecule like family member b
A8K7I4	0.64313	CLCA1	chloride channel accessory 1
A8K855	0.34115	EFCAB7	EF-hand calcium binding domain 7
A8K8P3	0.569991	SFI1	SFI1 centrin binding protein
A8K8V0	0.30407	ZNF785	zinc finger protein 785
A8K979	0.653542	ERI2	ERI1 exoribonuclease family member 2
A8MPP1	0.75039	DDX11L8	DEAD/H-box helicase 11 like 8 (pseudogene)
A8MPS7	0.77336	YDJC	YdjC chitooligosaccharide deacetylase homolog
A8MPX8	0.47011	PP2D1	protein phosphatase 2C like domain containing 1
A8MPY1	0.39074	GABRR3	gamma-aminobutyric acid type A receptor subunit rho3
A8MQ14	0.395672	ZNF850	zinc finger protein 850
A8MQ27	0.441457	NEURL1B	neuralized E3 ubiquitin protein ligase 1B
A8MQT2	0.620358	GOLGA8B	golgin A8 family member B
A8MRT5	0.50496	NPIPB5	nuclear pore complex interacting protein family member B5
A8MSI8	0.4929	LYRM9	LYR motif containing 9
A8MT19	0.449408	RHPN2P1	rhophilin Rho GTPase binding protein 2 pseudogene 1
A8MT33	0.71837	SYCE1L	synaptonemal complex central element protein 1 like
A8MT65	0.42154	ZNF891	zinc finger protein 891
A8MT69	0.49418	CENPX	centromere protein X
A8MTA8	0.33956	FAM166B	Protein FAM166B
A8MTB9	0.578448	CEACAM18	CEA cell adhesion molecule 18
A8MTI9	0.72422	PRSS47P	serine protease 47, pseudogene
A8MTJ3	0.44637	GNAT3	G protein subunit alpha transducin 3
A8MTJ6	0.5592	FOXI3	forkhead box I3
A8MTL0	0.74646	IQCF5	IQ motif containing F5
A8MTL3	0.51959	RNF212B	ring finger protein 212B
A8MTL9	0.41903	HMSD	histocompatibility minor serpin domain containing
A8MTQ0	0.59708	NOTO	notochord homeobox
A8MTT3	0.54528	CEBPZOS	CEBPZ opposite strand
A8MTY0	0.353576	ZNF724	zinc finger protein 724
A8MTZ0	0.55328	BBIP1	BBSome interacting protein 1
A8MU46	0.46464	SMTNL1	smoothelin like 1
A8MUH7	0.420229	PDZK1P1	PDZ domain containing 1 pseudogene 1
A8MUK1	0.3524	USP17L5	ubiquitin specific peptidase 17 like family member 5
A8MUM7	0.45537	LGALS16	galectin 16
A8MUP2	0.70471	CSKMT	citrate synthase lysine methyltransferase
A8MUP6	0.51831	GSG1L2	GSG1 like 2
A8MUU1	0.48042	FABP5P3	fatty acid binding protein 5 pseudogene 3
A8MUV8	0.387309	ZNF727	zinc finger protein 727
A8MUX0	0.53646	KRTAP16-1	keratin associated protein 16-1
A8MUZ8	0.382383	ZNF705G	zinc finger protein 705G
A8MV23	0.33463	SERPINE3	serpin family E member 3
A8MV24	0.38772	C17orf98	Uncharacterized protein C17orf98
A8MV57	0.37633	MPTX1	mucosal pentraxin 1 (pseudogene)
A8MV65	0.36217	VGLL3	vestigial like family member 3
A8MV72	0.81446		Putative UPF0607 protein ENSP00000382826
A8MVJ9	0.43677		Putative histone PARylation factor 1-like
A8MVS1	0.388324
A8MVS5	0.62425	HIDE1	Protein HIDE1
A8MVU1	0.384446	NCF1C	neutrophil cytosolic factor 1C (pseudogene)
A8MVW0	0.35415	FAM171A2	family with sequence similarity 171 member A2
A8MVW5	0.43245	HEPACAM2	HEPACAM family member 2
A8MVX0	0.589084	ARHGEF33	Rho guanine nucleotide exchange factor 33
A8MVZ5	0.46207	BTNL10P	butyrophilin like 10, pseudogene
A8MW92	0.598336	PHF20L1	PHD finger protein 20 like 1
A8MW95	0.591069	BECN2	beclin 2
A8MW99	0.536341	MEI4	meiotic double-stranded break formation protein 4
A8MWA4	0.406878	ZNF705EP	zinc finger protein 705E, pseudogene
A8MWD9	0.67922	SNRPGP15	small nuclear ribonucleoprotein polypeptide G pseudogene 15
A8MWE9	0.46994	EFCAB8	EF-hand calcium binding domain 8
A8MWK0	0.33786	FADS2B	fatty acid desaturase 2B (pseudogene)
A8MWL6	0.57426		Putative synaptogyrin-2 like protein
A8MWX3	0.73676	WASH4P	WASP family homolog 4, pseudogene
A8MWY0	0.399631	ELAPOR2	endosome-lysosome associated apoptosis and autophagy regulator family member 2
A8MX76	0.344009	CAPN14	calpain 14
A8MXD5	0.5435	GRXCR1	glutaredoxin and cysteine rich domain containing 1
A8MXE2	0.53125	B3GALT9	beta-1,3-galactosyltransferase 9
A8MXK1	0.722753	VSTM5	V-set and transmembrane domain containing 5
A8MXQ7	0.561797	IQANK1	IQ motif and ankyrin repeat containing 1
A8MXT2	0.41611	MAGEB17	MAGE family member B17
A8MXV4	0.3787	NUDT19	nudix hydrolase 19
A8MXV6	0.92425	CDRT15L2	CMT1A duplicated region transcript 15 like 2
A8MXY4	0.393511	ZNF99	zinc finger protein 99
A8MY62	0.79896	LACTBL1	lactamase beta like 1
A8MYB1	0.773679	TMCO5B	transmembrane and coiled-coil domains 5B (pseudogene)
A8MYJ7	0.38965	TTC34	tetratricopeptide repeat domain 34
A8MYU2	0.418483	KCNU1	potassium calcium-activated channel subfamily U member 1
A8MYV0	0.520374	DCDC2C	doublecortin domain containing 2C
A8MYZ0	0.34244	MINDY4B	MINDY family member 4B
A8MYZ5	0.77001	IQCF6	IQ motif containing F6
A8MYZ6	0.59421	FOXO6	forkhead box O6
A8MZ26	0.39103	EFCAB9	EF-hand calcium binding domain 9
A8MZ36	0.666989	EVPLL	envoplakin like
A8MZ59	0.60581	LEUTX	leucine twenty homeobox
A8MZA4	0.691738	GOLGA6L6	golgin A6 family like 6
A8MZH6	0.51648	OOSP1	oocyte secreted protein 1
A8TX70	0.633162	COL6A5	collagen type VI alpha 5 chain
A9QM74	0.50198	KPNA7	karyopherin subunit alpha 7
A9UHW6	0.47511	MIF4GD	MIF4G domain containing
A9YTQ3	0.46005	AHRR	aryl hydrocarbon receptor repressor
A9Z1Z3	0.315058	FER1L4	fer-1 like family member 4 (pseudogene)
B0FP48	0.47036	UPK3BL1	uroplakin 3B like 1
B0I1T2	0.369274	MYO1G	myosin IG
B0YJ81	0.4757	HACD1	3-hydroxyacyl-CoA dehydratase 1
B1AJZ9	0.676126	FHAD1	forkhead associated phosphopeptide binding domain 1
B1AK53	0.48033	ESPN	espin
B1AKI9	0.39544	ISM1	isthmin 1
B1AL46	0.45475	NUTM2E	NUT family member 2E
B1AL88	0.42135	NALF1	NALCN channel auxiliary factor 1
B1ANS9	0.707051	WDR64	WD repeat domain 64
B1APH4	0.470307	ZNF487	zinc finger protein 487
B2RC85	0.363905	RSPH10B2	radial spoke head 10 homolog B2
B2RD01	0.66171	CENPBD1P	CENPB DNA-binding domain containing 1, pseudogene
B2RN74	0.56856	OR11H12	olfactory receptor family 11 subfamily H member 12
B2RNN3	0.49908	C1QTNF9B	C1q and TNF related 9B
B2RPK0	0.47878	HMGB1P1	high mobility group box 1 pseudogene 1
B2RTY4	0.403731	MYO9A	myosin IXA
B2RU33	0.745726	POTEC	POTE ankyrin domain family member C
B2RUY7	0.372195	VWC2L	von Willebrand factor C domain containing 2 like
B2RV13	0.56085	CFAP97D1	CFAP97 domain containing 1
B2RXF0	0.38389	TMEM229A	transmembrane protein 229A
B2RXF5	0.35136	ZBTB42	zinc finger and BTB domain containing 42
B2RXH2	0.46133	KDM4E	lysine demethylase 4E
B2RXH4	0.39135	BTBD18	BTB domain containing 18
B2RXH8	0.63409	HNRNPCL2	heterogeneous nuclear ribonucleoprotein C like 2
B3GLJ2	0.37818	PATE3	prostate and testis expressed 3
B3KU38	0.534585	IQCJ-SCHIP1	IQCJ-SCHIP1 readthrough
B3SHH9	0.63389	TMEM114	transmembrane protein 114
B4DH59	0.87804	NBPF26	NBPF member 26
B4DS77	0.3388	SHISA9	shisa family member 9
B4DU55	0.370989	ZNF879	zinc finger protein 879
B4DX44	0.383172	ZNF736	zinc finger protein 736
B4DXR9	0.385561	ZNF732	zinc finger protein 732
B4DZS4	0.40838	TCP11X1	t-complex 11 family, X-linked 1
B4E2M5	0.56427	ANKRD66	ankyrin repeat domain 66
B5MCN3	0.34648	SEC14L6	SEC14 like lipid binding 6
B5MCY1	0.347098	TDRD15	tudor domain containing 15
B5MD39	0.38891	GGTLC3	gamma-glutamyltransferase light chain family member 3
B5ME19	0.445889	EIF3CL	eukaryotic translation initiation factor 3 subunit C like
B6A8C7	0.52218	TARM1	T cell-interacting, activating receptor on myeloid cells 1
B6SEH8	0.73122	ERVV-1	endogenous retrovirus group V member 1, envelope
B6SEH9	0.578046	ERVV-2	endogenous retrovirus group V member 2, envelope
B7U540	0.3515	KCNJ18	potassium inwardly rectifying channel subfamily J member 18
B7Z1M9	0.54251	C2CD4D	C2 calcium dependent domain containing 4D
B7Z6K7	0.370464	ZNF814	zinc finger protein 814
B7Z8K6	0.56176	TRDC	T cell receptor delta constant
B7ZAQ6	0.34231	GPR89A	G protein-coupled receptor 89A
B7ZBB8	0.52581	PPP1R3G	protein phosphatase 1 regulatory subunit 3G
B7ZC32	0.410755	KIF28P	kinesin family member 28, pseudogene
B7ZLF3	0.35801	LOC728743	Zinc finger and SCAN domain-containing protein 2-like
B7ZW38	0.62537	HNRNPCL3	heterogeneous nuclear ribonucleoprotein C like 3
B8ZZ34	0.35912	SHISA8	shisa family member 8
B9A014	0.52909	C21orf140	chromosome 21 open reading frame 140
B9A064	0.56363	IGLL5	immunoglobulin lambda like polypeptide 5
B9A6J9	0.35484	TBC1D3L	TBC1 domain family member 3L
B9EJG8	0.53196	TMEM150C	transmembrane protein 150C
C4AMC7	0.4781	WASH3P	WASP family homolog 3, pseudogene
C9J069	0.38369	AJM1	apical junction component 1 homolog
C9J1S8	0.33711	TRIM49D1	tripartite motif containing 49D1
C9J202	0.47046	ALG1L2	ALG1 chitobiosyldiphosphodolichol beta-mannosyltransferase like 2
C9J2P7	0.3543	USP17L15	ubiquitin specific peptidase 17 like family member 15
C9J3I9	0.84012	C5orf58	chromosome 5 open reading frame 58
C9J6K1	0.42573	C19orf81	chromosome 19 open reading frame 81
C9J798	0.35089	RASA4B	RAS p21 protein activator 4B
C9JA33	0.571269	PALM2AKAP2	PALM2 and AKAP2 fusion
C9JBD0	0.5398	KRBOX1	KRAB box domain containing 1
C9JCN9	0.91862	HSBP1L1	heat shock factor binding protein 1 like 1
C9JDP6	0.49948	CLDN25	claudin 25
C9JE40	0.463417	PATL2	PAT1 homolog 2
C9JG80	0.45564	NPIPB4	nuclear pore complex interacting protein family member B4
C9JH25	0.61207	PRRT4	proline rich transmembrane protein 4
C9JI98	0.74523	TMEM238	transmembrane protein 238
C9JJ37	0.4168	BTBD19	BTB domain containing 19
C9JJH3	0.36502	USP17L10	ubiquitin specific peptidase 17 like family member 10
C9JL84	0.450168	HHLA1	HHLA1 neighbor of OC90
C9JLJ4	0.35853	USP17L13	ubiquitin specific peptidase 17 like family member 13
C9JLR9	0.457183	ZFTA	zinc finger translocation associated
C9JN71	0.335938	ZNF878	zinc finger protein 878
C9JPN9	0.35508	USP17L12	ubiquitin specific peptidase 17 like family member 12
C9JQI7	0.455941	TMEM232	transmembrane protein 232
C9JR72	0.5241	KBTBD13	kelch repeat and BTB domain containing 13
C9JRZ8	0.82191	AKR1B15	aldo-keto reductase family 1 member B15
C9JSJ3	0.46604	MEIOSIN	meiosis initiator
C9JTQ0	0.7083	ANKRD63	ankyrin repeat domain 63
C9JVI0	0.36349	USP17L11	ubiquitin specific peptidase 17 like family member 11
D3W0D1	0.40725	KLRF2	killer cell lectin like receptor F2
D6R901	0.363	USP17L21	ubiquitin specific peptidase 17 like family member 21
D6R9N7	0.3535	USP17L18	ubiquitin specific peptidase 17 like family member 18
D6RA61	0.36481	USP17L22	ubiquitin specific peptidase 17 like family member 22
D6RBM5	0.4058	USP17L23	ubiquitin specific peptidase 17 like family member 23
D6RBQ6	0.36523	USP17L17	ubiquitin specific peptidase 17 like family member 17
D6RCP7	0.35415	USP17L19	ubiquitin specific peptidase 17 like family member 19
D6RF30	0.795283	GOLGA8K	golgin A8 family member K
D6RGH6	0.8445	MCIDAS	multiciliate differentiation and DNA synthesis associated cell cycle protein
D6RJB6	0.36407	USP17L20	ubiquitin specific peptidase 17 like family member 20
E2RYF6	0.577031	MUC22	mucin 22
E2RYF7	0.48946	HCG22	HLA complex group 22 (gene/pseudogene)
E5RG02	0.45618	PRSS46P	serine protease 46, pseudogene
E5RHQ5	0.40942	NPIPB11	nuclear pore complex interacting protein family member B11
E5RIL1	0.46951	UPK3BL2	uroplakin 3B like 2
E5RJM6	0.49526	ANKRD65	ankyrin repeat domain 65
E5RQL4	0.44208	FTCDNL1	formiminotransferase cyclodeaminase N-terminal like
E7ERA6	0.39581	RNF223	ring finger protein 223
E7ETH6	0.435363	ZNF587B	zinc finger protein 587B
E7EU14	0.7182
E9PAV3	0.36893	NACA	nascent polypeptide associated complex subunit alpha
E9PB15	0.49858	PTGES3L	prostaglandin E synthase 3 like
E9PGG2	0.41896	ANHX	anomalous homeobox
E9PI22	0.42681	PRR23D1	proline rich 23 domain containing 1
E9PIF3	0.81395	NPIPA2	nuclear pore complex interacting protein family member A2
E9PJI5	0.893056	NPIPA7	nuclear pore complex interacting protein family member A7
E9PKD4	0.833229	NPIPA5	nuclear pore complex interacting protein family member A5
E9PQ18	0.48195	XNDC1N	XRCC1 N-terminal domain containing 1, N-terminal like
E9PQ53	0.6205	NDUFC2-KCTD14	NDUFC2-KCTD14 readthrough
E9PQX1	0.61891	TMEM262	transmembrane protein 262
F2Z333	0.52042	FNDC10	fibronectin type III domain containing 10
F5GYI3	0.43824	UBAP1L	ubiquitin associated protein 1 like
F5H284	0.82174	PPIAL4D	peptidylprolyl isomerase A like 4D
F5H4B4	0.541249	FAM227A	family with sequence similarity 227 member A
F8VTS6	0.364	RFPL4AL1	ret finger protein like 4A like 1
F8W0I5	0.428347	NPIPB12	nuclear pore complex interacting protein family member B12
F8WBI6	0.811228	GOLGA8N	golgin A8 family member N
F8WFD2	0.826058	NPIPA3	nuclear pore complex interacting protein family member A3
G2XKQ0	0.67493	SUMO1P1	SUMO1 pseudogene 1
G3V0H7	0.66523	SLCO1B7	solute carrier organic anion transporter family member 1B7 (putative)
G9CGD6	0.569513	CNK3/IPCEF1	CNK3/IPCEF1 fusion protein
H0UI37	0.56681	TSTD3	thiosulfate sulfurtransferase like domain containing 3
H0Y354	0.48945	FAM72C	family with sequence similarity 72 member C
H0Y7S4	0.49149	PRAMEF26	PRAME family member 26
H0YKK7	0.756375	GOLGA6L19	golgin A6 family like 19
H0YL14	0.63461	TMEM250	transmembrane protein 250
H0YM25	0.72621	GOLGA6L22	golgin A6 family like 22
H3BNL1	0.43385	C3orf84	chromosome 3 open reading frame 84
H3BNL8	0.51766	ARMH2	armadillo like helical domain containing 2
H3BPF8	0.811193	GOLGA8S	golgin A8 family member S
H3BPM6	0.45629	MKRN2OS	MKRN2 opposite strand
H3BQJ8	0.40599	LY6L	lymphocyte antigen 6 family member L
H3BQL2	0.783405	GOLGA8T	golgin A8 family member T
H3BRN8	0.3684	PIERCE2	piercer of microtubule wall 2
H3BS89	0.55152	TMEM178B	transmembrane protein 178B
H3BSY2	0.770007	GOLGA8M	golgin A8 family member M
H3BUK9	0.76092	POTEB2	POTE ankyrin domain family member B2
H3BV12	0.815495	GOLGA8Q	golgin A8 family member Q
H3BV60	0.49378	TGFBR3L	transforming growth factor beta receptor 3 like
H7BZ55	0.612864	CROCC2	ciliary rootlet coiled-coil, rootletin family member 2
H7C241	0.49619	CLDN34	claudin 34
H7C350	0.72777	CCDC188	coiled-coil domain containing 188
I1YAP6	0.385298	TRIM77	tripartite motif containing 77
I6L899	0.816331	GOLGA8R	golgin A8 family member R
J3QSS5	0.90446	TCP10L2	t-complex 10 like 2 (pseudogene)
K9M1U5	0.44397	IFNL4	interferon lambda 4 (gene/pseudogene)
L0R819	0.70738	ASDURF	ASNSD1 upstream open reading frame
M0QZC1	0.39844	RNF225	ring finger protein 225
M0R2J8	0.419737	DCDC1	doublecortin domain containing 1
M5A8F1	0.3721	ERVH48-1	endogenous retrovirus group 48 member 1, envelope
O00110	0.35456	OVOL3	ovo like zinc finger 3
O00115	0.47124	DNASE2	deoxyribonuclease 2, lysosomal
O00116	0.77258	AGPS	alkylglycerone phosphate synthase
O00124	0.685714	UBXN8	UBX domain protein 8
O00139	0.4782	KIF2A	kinesin family member 2A
O00141	0.5178	SGK1	serum/glucocorticoid regulated kinase 1
O00142	0.71527	TK2	thymidine kinase 2
O00144	0.500116	FZD9	frizzled class receptor 9
O00148	0.76115	DDX39A	DExD-box helicase 39A
O00151	0.498984	PDLIM1	PDZ and LIM domain 1
O00154	0.7089	ACOT7	acyl-CoA thioesterase 7
O00155	0.56172	GPR25	G protein-coupled receptor 25
O00159	0.39563	MYO1C	myosin IC
O00160	0.375573	MYO1F	myosin IF
O00161	0.58016	SNAP23	synaptosome associated protein 23
O00167	0.48919	EYA2	EYA transcriptional coactivator and phosphatase 2
O00170	0.585873	AIP	aryl hydrocarbon receptor interacting protein
O00175	0.4953	CCL24	C-C motif chemokine ligand 24
O00178	0.60844	GTPBP1	GTP binding protein 1
O00180	0.3363	KCNK1	potassium two pore domain channel subfamily K member 1
O00182	0.45838	LGALS9	galectin 9
O00186	0.33593	STXBP3	syntaxin binding protein 3
O00187	0.512608	MASP2	MBL associated serine protease 2
O00189	0.32051	AP4M1	adaptor related protein complex 4 subunit mu 1
O00192	0.48997	ARVCF	ARVCF delta catenin family member
O00194	0.70279	RAB27B	RAB27B, member RAS oncogene family
O00203	0.43959	AP3B1	adaptor related protein complex 3 subunit beta 1
O00204	0.42265	SULT2B1	sulfotransferase family 2B member 1
O00206	0.617313	TLR4	toll like receptor 4
O00212	0.71536	RHOD	ras homolog family member D
O00213	0.397318	APBB1	amyloid beta precursor protein binding family B member 1
O00214	0.44929	LGALS8	galectin 8
O00217	0.66185	NDUFS8	NADH:ubiquinone oxidoreductase core subunit S8
O00219	0.63275	HAS3	hyaluronan synthase 3
O00220	0.38291	TNFRSF10A	TNF receptor superfamily member 10a
O00221	0.78237	NFKBIE	NFKB inhibitor epsilon
O00222	0.674806	GRM8	glutamate metabotropic receptor 8
O00231	0.57344	PSMD11	proteasome 26S subunit, non-ATPase 11
O00232	0.509502	PSMD12	proteasome 26S subunit, non-ATPase 12
O00233	0.68633	PSMD9	proteasome 26S subunit, non-ATPase 9
O00237	0.344026	RNF103	ring finger protein 103
O00238	0.506809	BMPR1B	bone morphogenetic protein receptor type 1B
O00241	0.5881	SIRPB1	signal regulatory protein beta 1
O00244	0.79915	ATOX1	antioxidant 1 copper chaperone
O00254	0.56564	F2RL2	coagulation factor II thrombin receptor like 2
O00255	0.52867	MEN1	menin 1
O00257	0.465483	CBX4	chromobox 4
O00258	0.83664	GET1	guided entry of tail-anchored proteins factor 1
O00264	0.37135	PGRMC1	progesterone receptor membrane component 1
O00267	0.532885	SUPT5H	SPT5 homolog, DSIF elongation factor subunit
O00268	0.458433	TAF4	TATA-box binding protein associated factor 4
O00270	0.58078	GPR31	G protein-coupled receptor 31
O00273	0.562411	DFFA	DNA fragmentation factor subunit alpha
O00291	0.587755	HIP1	huntingtin interacting protein 1
O00292	0.32619	LEFTY2	left-right determination factor 2
O00294	0.4371	TULP1	TUB like protein 1
O00295	0.42694	TULP2	TUB like protein 2
O00299	0.71373	CLIC1	chloride intracellular channel 1
O00300	0.37054	TNFRSF11B	TNF receptor superfamily member 11b
O00303	0.476248	EIF3F	eukaryotic translation initiation factor 3 subunit F
O00305	0.46814	CACNB4	calcium voltage-gated channel auxiliary subunit beta 4
O00308	0.50813	WWP2	WW domain containing E3 ubiquitin protein ligase 2
O00311	0.5302	CDC7	cell division cycle 7
O00321	0.53348	ETV2	ETS variant transcription factor 2
O00322	0.52883	UPK1A	uroplakin 1A
O00327	0.4478	BMAL1	basic helix-loop-helix ARNT like 1
O00329	0.328348	PIK3CD	phosphatidylinositol-4,5-bisphosphate 3-kinase catalytic subunit delta
O00330	0.873	PDHX	pyruvate dehydrogenase complex component X
O00337	0.783721	SLC28A1	solute carrier family 28 member 1
O00338	0.47062	SULT1C2	sulfotransferase family 1C member 2
O00339	0.645334	MATN2	matrilin 2
O00341	0.479854	SLC1A7	solute carrier family 1 member 7
O00358	0.58537	FOXE1	forkhead box E1
O00370	0.481026		LINE-1 retrotransposable element ORF2 protein (ORF2p) [Includes: Reverse transcriptase (EC 2.7.7.49); Endonuclease (EC 3.1.21.-)]
O00391	0.43124	QSOX1	quiescin sulfhydryl oxidase 1
O00398	0.56158	P2RY10	P2Y receptor family member 10
O00399	0.73484	DCTN6	dynactin subunit 6
O00400	0.71809	SLC33A1	solute carrier family 33 member 1
O00401	0.452477	WASL	WASP like actin nucleation promoting factor
O00408	0.647096	PDE2A	phosphodiesterase 2A
O00409	0.59303	FOXN3	forkhead box N3
O00410	0.33505	IPO5	importin 5
O00411	0.35943	POLRMT	RNA polymerase mitochondrial
O00418	0.3716	EEF2K	eukaryotic elongation factor 2 kinase
O00421	0.60896	CCRL2	C-C motif chemokine receptor like 2
O00422	0.4322	SAP18	Sin3A associated protein 18
O00423	0.41242	EML1	EMAP like 1
O00425	0.531145	IGF2BP3	insulin like growth factor 2 mRNA binding protein 3
O00429	0.49966	DNM1L	dynamin 1 like
O00442	0.8997	RTCA	RNA 3'-terminal phosphate cyclase
O00443	0.333296	PIK3C2A	phosphatidylinositol-4-phosphate 3-kinase catalytic subunit type 2 alpha
O00444	0.483101	PLK4	polo like kinase 4
O00445	0.55713	SYT5	synaptotagmin 5
O00451	0.32236	GFRA2	GDNF family receptor alpha 2
O00458	0.53036	IFRD1	interferon related developmental regulator 1
O00459	0.513811	PIK3R2	phosphoinositide-3-kinase regulatory subunit 2
O00461	0.709171	GOLIM4	golgi integral membrane protein 4
O00462	0.55817	MANBA	mannosidase beta
O00463	0.48201	TRAF5	TNF receptor associated factor 5
O00468	0.39751	AGRN	agrin
O00469	0.37006	PLOD2	procollagen-lysine,2-oxoglutarate 5-dioxygenase 2
O00470	0.578537	MEIS1	Meis homeobox 1
O00471	0.381854	EXOC5	exocyst complex component 5
O00472	0.479607	ELL2	elongation factor for RNA polymerase II 2
O00476	0.641767	SLC17A3	solute carrier family 17 member 3
O00478	0.493749	BTN3A3	butyrophilin subfamily 3 member A3
O00481	0.548356	BTN3A1	butyrophilin subfamily 3 member A1
O00482	0.418858	NR5A2	nuclear receptor subfamily 5 group A member 2
O00483	0.4712	NDUFA4	NDUFA4 mitochondrial complex associated
O00487	0.515499	PSMD14	proteasome 26S subunit, non-ATPase 14
O00488	0.3347	ZNF593	zinc finger protein 593
O00499	0.541836	BIN1	bridging integrator 1
O00501	0.56603	CLDN5	claudin 5
O00505	0.5124	KPNA3	karyopherin subunit alpha 3
O00506	0.51573	STK25	serine/threonine kinase 25
O00507	0.458207	USP9Y	ubiquitin specific peptidase 9 Y-linked
O00519	0.29466	FAAH	fatty acid amide hydrolase
O00522	0.407614	KRIT1	KRIT1 ankyrin repeat containing
O00526	0.5917	UPK2	uroplakin 2
O00533	0.392421	CHL1	cell adhesion molecule L1 like
O00534	0.36361	VWA5A	von Willebrand factor A domain containing 5A
O00541	0.371365	PES1	pescadillo ribosomal biogenesis factor 1
O00548	0.359687	DLL1	delta like canonical Notch ligand 1
O00555	0.412645	CACNA1A	calcium voltage-gated channel subunit alpha1 A
O00560	0.53441	SDCBP	syndecan binding protein
O00562	0.473962	PITPNM1	phosphatidylinositol transfer protein membrane associated 1
O00566	0.416401	MPHOSPH10	M-phase phosphoprotein 10
O00567	0.407887	NOP56	NOP56 ribonucleoprotein
O00570	0.43052	SOX1	SRY-box transcription factor 1
O00571	0.804603	DDX3X	DEAD-box helicase 3 X-linked
O00574	0.59633	CXCR6	C-X-C motif chemokine receptor 6
O00584	0.63677	RNASET2	ribonuclease T2
O00585	0.49647	CCL21	C-C motif chemokine ligand 21
O00587	0.53741	MFNG	MFNG O-fucosylpeptide 3-beta-N-acetylglucosaminyltransferase
O00590	0.56149	ACKR2	atypical chemokine receptor 2
O00591	0.39729	GABRP	gamma-aminobutyric acid type A receptor subunit pi
O00592	0.36016	PODXL	podocalyxin like
O00602	0.37618	FCN1	ficolin 1
O00622	0.363331	CCN1	cellular communication network factor 1
O00623	0.466391	PEX12	peroxisomal biogenesis factor 12
O00624	0.87722	SLC17A2	solute carrier family 17 member 2
O00625	0.69814	PIR	pirin
O00626	0.49433	CCL22	C-C motif chemokine ligand 22
O00628	0.82912	PEX7	peroxisomal biogenesis factor 7
O00629	0.51221	KPNA4	karyopherin subunit alpha 4
O00634	0.350559	NTN3	netrin 3
O00635	0.498111	TRIM38	tripartite motif containing 38
O00712	0.3718	NFIB	nuclear factor I B
O00716	0.562026	E2F3	E2F transcription factor 3
O00743	0.63894	PPP6C	protein phosphatase 6 catalytic subunit
O00744	0.3797	WNT10B	Wnt family member 10B
O00746	0.93362	NME4	NME/NM23 nucleoside diphosphate kinase 4
O00748	0.41715	CES2	carboxylesterase 2
O00750	0.334076	PIK3C2B	phosphatidylinositol-4-phosphate 3-kinase catalytic subunit type 2 beta
O00754	0.76794	MAN2B1	mannosidase alpha class 2B member 1
O00755	0.35688	WNT7A	Wnt family member 7A
O00757	0.95018	FBP2	fructose-bisphosphatase 2
O00762	0.4619	UBE2C	ubiquitin conjugating enzyme E2 C
O00763	0.527154	ACACB	acetyl-CoA carboxylase beta
O00764	0.88623	PDXK	pyridoxal kinase
O00767	0.34325	SCD	stearoyl-CoA desaturase
O14490	0.592	DLGAP1	DLG associated protein 1
O14492	0.464599	SH2B2	SH2B adaptor protein 2
O14493	0.55679	CLDN4	claudin 4
O14494	0.54433	PLPP1	phospholipid phosphatase 1
O14495	0.54356	PLPP3	phospholipid phosphatase 3
O14497	0.41161	ARID1A	AT-rich interaction domain 1A
O14498	0.48277	ISLR	immunoglobulin superfamily containing leucine rich repeat
O14503	0.643979	BHLHE40	basic helix-loop-helix family member e40
O14508	0.41142	SOCS2	suppressor of cytokine signaling 2
O14511	0.657225	NRG2	neuregulin 2
O14512	0.42506	SOCS7	suppressor of cytokine signaling 7
O14513	0.794405	NCKAP5	NCK associated protein 5
O14514	0.449475	ADGRB1	adhesion G protein-coupled receptor B1
O14519	0.74762	CDK2AP1	cyclin dependent kinase 2 associated protein 1
O14520	0.92049	AQP7	aquaporin 7
O14521	0.62995	SDHD	succinate dehydrogenase complex subunit D
O14522	0.424043	PTPRT	protein tyrosine phosphatase receptor type T
O14523	0.530929	C2CD2L	C2CD2 like
O14524	0.389078	NEMP1	nuclear envelope integral membrane protein 1
O14525	0.350049	ASTN1	astrotactin 1
O14526	0.419965	FCHO1	FCH and mu domain containing endocytic adaptor 1
O14529	0.614449	CUX2	cut like homeobox 2
O14530	0.65862	TXNDC9	thioredoxin domain containing 9
O14531	0.92281	DPYSL4	dihydropyrimidinase like 4
O14543	0.44972	SOCS3	suppressor of cytokine signaling 3
O14544	0.41123	SOCS6	suppressor of cytokine signaling 6
O14545	0.402916	TRAFD1	TRAF-type zinc finger domain containing 1
O14548	0.53927	COX7A2L	cytochrome c oxidase subunit 7A2 like
O14556	0.96567	GAPDHS	glyceraldehyde-3-phosphate dehydrogenase, spermatogenic
O14558	0.642427	HSPB6	heat shock protein family B (small) member 6
O14559	0.458559	ARHGAP33	Rho GTPase activating protein 33
O14561	0.78884	NDUFAB1	NADH:ubiquinone oxidoreductase subunit AB1
O14562	0.48615	UBFD1	ubiquitin family domain containing 1
O14569	0.61087	CYB561D2	cytochrome b561 family member D2
O14576	0.77804	DYNC1I1	dynein cytoplasmic 1 intermediate chain 1
O14578	0.615685	CIT	citron rho-interacting serine/threonine kinase
O14579	0.55627	COPE	COPI coat complex subunit epsilon
O14581	0.56622	OR7A17	olfactory receptor family 7 subfamily A member 17
O14593	0.68148	RFXANK	regulatory factor X associated ankyrin containing protein
O14594	0.372333	NCAN	neurocan
O14595	0.57408	CTDSP2	CTD small phosphatase 2
O14602	0.63773	EIF1AY	eukaryotic translation initiation factor 1A Y-linked
O14607	0.488664	UTY	ubiquitously transcribed tetratricopeptide repeat containing, Y-linked
O14610	0.44746	GNGT2	G protein subunit gamma transducin 2
O14617	0.471421	AP3D1	adaptor related protein complex 3 subunit delta 1
O14618	0.80577	CCS	copper chaperone for superoxide dismutase
O14625	0.48495	CXCL11	C-X-C motif chemokine ligand 11
O14626	0.5498	GPR171	G protein-coupled receptor 171
O14627	0.60916	CDX4	caudal type homeobox 4
O14628	0.373951	ZNF195	zinc finger protein 195
O14638	0.34594	ENPP3	ectonucleotide pyrophosphatase/phosphodiesterase 3
O14639	0.348968	ABLIM1	actin binding LIM protein 1
O14640	0.54488	DVL1	dishevelled segment polarity protein 1
O14641	0.551168	DVL2	dishevelled segment polarity protein 2
O14645	0.46512	DNALI1	dynein axonemal light intermediate chain 1
O14646	0.498855	CHD1	chromodomain helicase DNA binding protein 1
O14647	0.481507	CHD2	chromodomain helicase DNA binding protein 2
O14649	0.33816	KCNK3	potassium two pore domain channel subfamily K member 3
O14653	0.74434	GOSR2	golgi SNAP receptor complex member 2
O14654	0.34728	IRS4	insulin receptor substrate 4
O14656	0.679	TOR1A	torsin family 1 member A
O14657	0.67276	TOR1B	torsin family 1 member B
O14662	0.615112	STX16	syntaxin 16
O14668	0.46234	PRRG1	proline rich and Gla domain 1
O14672	0.344414	ADAM10	ADAM metallopeptidase domain 10
O14678	0.86576	ABCD4	ATP binding cassette subfamily D member 4
O14681	0.59365	EI24	EI24 autophagy associated transmembrane protein
O14682	0.540285	ENC1	ectodermal-neural cortex 1
O14683	0.61856	TP53I11	tumor protein p53 inducible protein 11
O14684	0.77232	PTGES	prostaglandin E synthase
O14709	0.413198	ZNF197	zinc finger protein 197
O14713	0.41694	ITGB1BP1	integrin subunit beta 1 binding protein 1
O14715	0.43525	RGPD8	RANBP2 like and GRIP domain containing 8
O14717	0.61516	TRDMT1	tRNA aspartic acid methyltransferase 1
O14718	0.59628	RRH	retinal pigment epithelium-derived rhodopsin homolog
O14727	0.712025	APAF1	apoptotic peptidase activating factor 1
O14730	0.594019	RIOK3	RIO kinase 3
O14732	0.88233	IMPA2	inositol monophosphatase 2
O14733	0.53839	MAP2K7	mitogen-activated protein kinase kinase 7
O14734	0.89293	ACOT8	acyl-CoA thioesterase 8
O14735	0.68768	CDIPT	CDP-diacylglycerol--inositol 3-phosphatidyltransferase
O14737	0.46512	PDCD5	programmed cell death 5
O14744	0.38805	PRMT5	protein arginine methyltransferase 5
O14745	0.58984	SLC9A3R1	Na(+)/H(+) exchange regulatory cofactor NHE-RF1 (NHERF-1) (Ezrin-radixin-moesin-binding phosphoprotein 50) (EBP50) (Regulatory cofactor of Na(+)/H(+) exchanger) (Sodium-hydrogen exchanger regulatory factor 1) (Solute carrier family 9 isoform A3 regulatory factor 1)
O14746	0.349256	TERT	telomerase reverse transcriptase
O14753	0.39875	OVOL1	ovo like transcriptional repressor 1
O14756	0.74443	HSD17B6	hydroxysteroid 17-beta dehydrogenase 6
O14757	0.574728	CHEK1	checkpoint kinase 1
O14763	0.38219	TNFRSF10B	TNF receptor superfamily member 10b
O14764	0.39381	GABRD	gamma-aminobutyric acid type A receptor subunit delta
O14770	0.57266	MEIS2	Meis homeobox 2
O14771	0.367385	ZNF213	zinc finger protein 213
O14772	0.46102	FPGT	fucose-1-phosphate guanylyltransferase
O14773	0.45666	TPP1	tripeptidyl peptidase 1
O14775	0.75093	GNB5	G protein subunit beta 5
O14776	0.512737	TCERG1	transcription elongation regulator 1
O14777	0.669743	NDC80	NDC80 kinetochore complex component
O14782	0.498248	KIF3C	kinesin family member 3C
O14786	0.488271	NRP1	neuropilin 1
O14787	0.36812	TNPO2	transportin 2
O14788	0.48097	TNFSF11	TNF superfamily member 11
O14791	0.630165	APOL1	apolipoprotein L1
O14792	0.46224	HS3ST1	heparan sulfate-glucosamine 3-sulfotransferase 1
O14793	0.44649	MSTN	myostatin
O14795	0.472317	UNC13B	unc-13 homolog B
O14796	0.46208	SH2D1B	SH2 domain containing 1B
O14798	0.3132	TNFRSF10C	TNF receptor superfamily member 10c
O14802	0.51359	POLR3A	RNA polymerase III subunit A
O14804	0.55526	TAAR5	trace amine associated receptor 5
O14807	0.69203	MRAS	muscle RAS oncogene homolog
O14813	0.60761	PHOX2A	paired like homeobox 2A
O14815	0.34758	CAPN9	calpain 9
O14817	0.44791	TSPAN4	tetraspanin 4
O14818	0.58741	PSMA7	proteasome 20S subunit alpha 7
O14827	0.398454	RASGRF2	Ras protein specific guanine nucleotide releasing factor 2
O14828	0.65339	SCAMP3	secretory carrier membrane protein 3
O14829	0.564955	PPEF1	protein phosphatase with EF-hand domain 1
O14830	0.424247	PPEF2	protein phosphatase with EF-hand domain 2
O14832	0.53319	PHYH	phytanoyl-CoA 2-hydroxylase
O14836	0.3723	TNFRSF13B	TNF receptor superfamily member 13B
O14841	0.359394	OPLAH	5-oxoprolinase, ATP-hydrolysing
O14842	0.55691	FFAR1	free fatty acid receptor 1
O14843	0.56612	FFAR3	free fatty acid receptor 3
O14862	0.440774	AIM2	absent in melanoma 2
O14863	0.78799	SLC30A4	solute carrier family 30 member 4
O14867	0.505782	BACH1	BTB domain and CNC homolog 1
O14874	0.45502	BCKDK	branched chain keto acid dehydrogenase kinase
O14879	0.48447	IFIT3	interferon induced protein with tetratricopeptide repeats 3
O14880	0.75267	MGST3	microsomal glutathione S-transferase 3
O14893	0.45123	GEMIN2	gem nuclear organelle associated protein 2
O14894	0.57219	TM4SF5	transmembrane 4 L six family member 5
O14896	0.417422	IRF6	interferon regulatory factor 6
O14901	0.33733	KLF11	KLF transcription factor 11
O14904	0.38503	WNT9A	Wnt family member 9A
O14907	0.54967	TAX1BP3	Tax1 binding protein 3
O14908	0.3444	GIPC1	GIPC PDZ domain containing family member 1
O14910	0.48815	LIN7A	lin-7 homolog A, crumbs cell polarity complex component
O14917	0.458238	PCDH17	protocadherin 17
O14920	0.41803	IKBKB	inhibitor of nuclear factor kappa B kinase subunit beta
O14921	0.46285	RGS13	regulator of G protein signaling 13
O14924	0.439843	RGS12	regulator of G protein signaling 12
O14925	0.69318	TIMM23	translocase of inner mitochondrial membrane 23
O14926	0.30196	FSCN2	fascin actin-bundling protein 2, retinal
O14929	0.3759	HAT1	histone acetyltransferase 1
O14931	0.62741	NCR3	natural cytotoxicity triggering receptor 3
O14933	0.47398	UBE2L6	ubiquitin conjugating enzyme E2 L6
O14936	0.594283	CASK	calcium/calmodulin dependent serine protein kinase
O14939	0.58039	PLD2	phospholipase D2
O14948	0.5061	TFEC	transcription factor EC
O14949	0.47887	UQCRQ	ubiquinol-cytochrome c reductase complex III subunit VII
O14950	0.45767	MYL12B	myosin light chain 12B
O14957	0.51354	UQCR11	ubiquinol-cytochrome c reductase, complex III subunit XI
O14958	0.37044	CASQ2	calsequestrin 2
O14960	0.72255	LECT2	leukocyte cell derived chemotaxin 2
O14964	0.522671	HGS	hepatocyte growth factor-regulated tyrosine kinase substrate
O14965	0.56221	AURKA	aurora kinase A
O14966	0.68604	RAB29	RAB29, member RAS oncogene family
O14967	0.39423	CLGN	calmegin
O14972	0.3854	VPS26C	VPS26 endosomal protein sorting factor C
O14974	0.541407	PPP1R12A	protein phosphatase 1 regulatory subunit 12A
O14975	0.777807	SLC27A2	solute carrier family 27 member 2
O14976	0.455966	GAK	cyclin G associated kinase
O14977	0.77924	AZIN1	antizyme inhibitor 1
O14978	0.40676	ZNF263	zinc finger protein 263
O14979	0.647982	HNRNPDL	heterogeneous nuclear ribonucleoprotein D like
O14980	0.44834	XPO1	exportin 1
O14981	0.471088	BTAF1	B-TFIID TATA-box binding protein associated factor 1
O14983	0.59827	ATP2A1	ATPase sarcoplasmic/endoplasmic reticulum Ca2+ transporting 1
O14986	0.43187	PIP5K1B	phosphatidylinositol-4-phosphate 5-kinase type 1 beta
O14990	0.52185	PPP1R2C	PPP1R2C family member C
O14994	0.78338	SYN3	synapsin III
O15013	0.74915	ARHGEF10	Rho guanine nucleotide exchange factor 10
O15014	0.64731	ZNF609	zinc finger protein 609
O15016	0.436889	TRIM66	tripartite motif containing 66
O15020	0.510974	SPTBN2	spectrin beta, non-erythrocytic 2
O15021	0.544208	MAST4	microtubule associated serine/threonine kinase family member 4
O15027	0.36217	SEC16A	SEC16 homolog A, endoplasmic reticulum export factor
O15031	0.46068	PLXNB2	plexin B2
O15033	0.385518	AREL1	apoptosis resistant E3 ubiquitin protein ligase 1
O15034	0.590451	RIMBP2	RIMS binding protein 2
O15037	0.425333	KHNYN	KH and NYN domain containing
O15040	0.515539	TECPR2	tectonin beta-propeller repeat containing 2
O15041	0.44351	SEMA3E	semaphorin 3E
O15042	0.545597	U2SURP	U2 snRNP associated SURP domain containing
O15047	0.491658	SETD1A	SET domain containing 1A, histone lysine methyltransferase
O15049	0.878008	N4BP3	NEDD4 binding protein 3
O15054	0.473784	KDM6B	lysine demethylase 6B
O15055	0.40493	PER2	period circadian regulator 2
O15056	0.22649	SYNJ2	synaptojanin 2
O15060	0.388969	ZBTB39	zinc finger and BTB domain containing 39
O15061	0.701823	SYNM	synemin
O15062	0.404072	ZBTB5	zinc finger and BTB domain containing 5
O15063	0.425501	GARRE1	granule associated Rac and RHOG effector 1
O15066	0.49331	KIF3B	kinesin family member 3B
O15067	0.94909	PFAS	phosphoribosylformylglycinamidine synthase
O15068	0.368707	MCF2L	MCF.2 cell line derived transforming sequence like
O15069	0.34042	NACAD	NAC alpha domain containing
O15072	0.361013	ADAMTS3	ADAM metallopeptidase with thrombospondin type 1 motif 3
O15075	0.554778	DCLK1	doublecortin like kinase 1
O15078	0.665586	CEP290	centrosomal protein 290
O15079	0.72419	SNPH	syntaphilin
O15083	0.693456	ERC2	ELKS/RAB6-interacting/CAST family member 2
O15084	0.42169	ANKRD28	ankyrin repeat domain 28
O15085	0.480056	ARHGEF11	Rho guanine nucleotide exchange factor 11
O15090	0.4189	ZNF536	zinc finger protein 536
O15091	0.36984	PRORP	protein only RNase P catalytic subunit
O15105	0.34845	SMAD7	SMAD family member 7
O15111	0.4143	CHUK	component of inhibitor of nuclear factor kappa B kinase complex
O15116	0.44078	LSM1	LSM1 homolog, mRNA degradation associated
O15117	0.486084	FYB1	FYN binding protein 1
O15118	0.517071	NPC1	NPC intracellular cholesterol transporter 1
O15119	0.4877	TBX3	T-box transcription factor 3
O15120	0.84521	AGPAT2	1-acylglycerol-3-phosphate O-acyltransferase 2
O15121	0.38432	DEGS1	delta 4-desaturase, sphingolipid 1
O15123	0.522812	ANGPT2	angiopoietin 2
O15126	0.6443	SCAMP1	secretory carrier membrane protein 1
O15127	0.66027	SCAMP2	secretory carrier membrane protein 2
O15131	0.49353	KPNA5	karyopherin subunit alpha 5
O15143	0.74004	ARPC1B	actin related protein 2/3 complex subunit 1B
O15144	0.37648	ARPC2	actin related protein 2/3 complex subunit 2
O15145	0.45937	ARPC3	actin related protein 2/3 complex subunit 3
O15146	0.462123	MUSK	muscle associated receptor tyrosine kinase
O15151	0.433871	MDM4	MDM4 regulator of p53
O15155	0.80409	BET1	Bet1 golgi vesicular membrane trafficking protein
O15156	0.33129	ZBTB7B	zinc finger and BTB domain containing 7B
O15160	0.48948	POLR1C	RNA polymerase I and III subunit C
O15162	0.47952	PLSCR1	phospholipid scramblase 1
O15164	0.491521	TRIM24	tripartite motif containing 24
O15169	0.521231	AXIN1	axin 1
O15173	0.37569	PGRMC2	progesterone receptor membrane component 2
O15178	0.51062	TBXT	T-box transcription factor T
O15182	0.41944	CETN3	centrin 3
O15194	0.57679	CTDSPL	CTD small phosphatase like
O15195	0.316602	VILL	villin like
O15197	0.427018	EPHB6	EPH receptor B6
O15198	0.35994	SMAD9	SMAD family member 9
O15204	0.34223	ADAMDEC1	ADAM like decysin 1
O15205	0.627305	UBD	ubiquitin D
O15209	0.386211	ZBTB22	zinc finger and BTB domain containing 22
O15211	0.372092	RGL2	ral guanine nucleotide dissociation stimulator like 2
O15212	0.73227	PFDN6	prefoldin subunit 6
O15213	0.6062	WDR46	WD repeat domain 46
O15217	0.71739	GSTA4	glutathione S-transferase alpha 4
O15218	0.55806	GPR182	G protein-coupled receptor 182
O15226	0.524166	NKRF	NFKB repressing factor
O15228	0.64362	GNPAT	glyceronephosphate O-acyltransferase
O15229	0.76652	KMO	kynurenine 3-monooxygenase
O15231	0.38482	ZNF185	zinc finger protein 185 with LIM domain
O15232	0.69188	MATN3	matrilin 3
O15234	0.31466	CASC3	CASC3 exon junction complex subunit
O15235	0.79255	MRPS12	mitochondrial ribosomal protein S12
O15239	0.46182	NDUFA1	NADH:ubiquinone oxidoreductase subunit A1
O15240	0.8762	VGF	VGF nerve growth factor inducible
O15243	0.53335	LEPROT	leptin receptor overlapping transcript
O15244	0.85147	SLC22A2	solute carrier family 22 member 2
O15245	0.86092	SLC22A1	solute carrier family 22 member 1
O15247	0.66946	CLIC2	chloride intracellular channel 2
O15254	0.62923	ACOX3	acyl-CoA oxidase 3, pristanoyl
O15258	0.4693	RER1	retention in endoplasmic reticulum sorting receptor 1
O15259	0.434118	NPHP1	nephrocystin 1
O15260	0.42704	SURF4	surfeit 4
O15264	0.51325	MAPK13	mitogen-activated protein kinase 13
O15265	0.4687	ATXN7	ataxin 7
O15266	0.60056	SHOX	SHOX homeobox
O15269	0.88122	SPTLC1	serine palmitoyltransferase long chain base subunit 1
O15270	0.78201	SPTLC2	serine palmitoyltransferase long chain base subunit 2
O15273	0.4412	TCAP	titin-cap
O15287	0.41704	FANCG	FA complementation group G
O15294	0.5108	OGT	O-linked N-acetylglucosamine (GlcNAc) transferase
O15296	0.34933	ALOX15B	arachidonate 15-lipoxygenase type B
O15297	0.554026	PPM1D	protein phosphatase, Mg2+/Mn2+ dependent 1D
O15303	0.604616	GRM6	glutamate metabotropic receptor 6
O15304	0.41828	SIVA1	SIVA1 apoptosis inducing factor
O15305	0.65936	PMM2	phosphomannomutase 2
O15315	0.66338	RAD51B	RAD51 paralog B
O15318	0.40101	POLR3G	RNA polymerase III subunit G
O15321	0.30442	TM9SF1	transmembrane 9 superfamily member 1
O15327	0.25632	INPP4B	inositol polyphosphate-4-phosphatase type II B
O15335	0.58818	CHAD	chondroadherin
O15342	0.6005	ATP6V0E1	ATPase H+ transporting V0 subunit e1
O15344	0.447663	MID1	midline 1
O15347	0.47321	HMGB3	high mobility group box 3
O15350	0.503907	TP73	tumor protein p73
O15353	0.61575	FOXN1	forkhead box N1
O15354	0.59945	GPR37	G protein-coupled receptor 37
O15355	0.60913	PPM1G	protein phosphatase, Mg2+/Mn2+ dependent 1G
O15357	0.579614	INPPL1	inositol polyphosphate phosphatase like 1
O15360	0.40562	FANCA	FA complementation group A
O15370	0.42653	SOX12	SRY-box transcription factor 12
O15371	0.38784	EIF3D	eukaryotic translation initiation factor 3 subunit D
O15372	0.39317	EIF3H	eukaryotic translation initiation factor 3 subunit H
O15374	0.87101	SLC16A4	solute carrier family 16 member 4
O15375	0.87515	SLC16A5	solute carrier family 16 member 5
O15379	0.50657	HDAC3	histone deacetylase 3
O15381	0.766387	NVL	nuclear VCP like
O15382	0.76634	BCAT2	branched chain amino acid transaminase 2
O15389	0.487509	SIGLEC5	sialic acid binding Ig like lectin 5
O15391	0.33303	YY2	YY2 transcription factor
O15392	0.43965	BIRC5	baculoviral IAP repeat containing 5
O15393	0.56301	TMPRSS2	transmembrane serine protease 2
O15394	0.501444	NCAM2	neural cell adhesion molecule 2
O15397	0.472657	IPO8	importin 8
O15399	0.621328	GRIN2D	glutamate ionotropic receptor NMDA type subunit 2D
O15400	0.652153	STX7	syntaxin 7
O15403	0.88213	SLC16A6	solute carrier family 16 member 6
O15405	0.683329	TOX3	TOX high mobility group box family member 3
O15409	0.655484	FOXP2	forkhead box P2
O15427	0.87861	SLC16A3	solute carrier family 16 member 3
O15431	0.52699	SLC31A1	solute carrier family 31 member 1
O15432	0.56014	SLC31A2	solute carrier family 31 member 2
O15438	0.440418	ABCC3	ATP binding cassette subfamily C member 3
O15439	0.43471	ABCC4	ATP binding cassette subfamily C member 4
O15440	0.4315	ABCC5	ATP binding cassette subfamily C member 5
O15442	0.57817	MPPED1	metallophosphoesterase domain containing 1
O15444	0.46921	CCL25	C-C motif chemokine ligand 25
O15446	0.39531	POLR1G	RNA polymerase I subunit G
O15455	0.479349	TLR3	toll like receptor 3
O15457	0.542253	MSH4	mutS homolog 4
O15460	0.72955	P4HA2	prolyl 4-hydroxylase subunit alpha 2
O15466	0.4682	ST8SIA5	ST8 alpha-N-acetyl-neuraminide alpha-2,8-sialyltransferase 5
O15467	0.53387	CCL16	C-C motif chemokine ligand 16
O15479	0.564252	MAGEB2	MAGE family member B2
O15480	0.38894	MAGEB3	MAGE family member B3
O15481	0.43478	MAGEB4	MAGE family member B4
O15482	0.720676	TEX28	testis expressed 28
O15484	0.37324	CAPN5	calpain 5
O15488	0.60136	GYG2	glycogenin 2
O15492	0.46401	RGS16	regulator of G protein signaling 16
O15496	0.40696	PLA2G10	phospholipase A2 group X
O15498	0.40542	YKT6	YKT6 v-SNARE homolog
O15499	0.60257	GSC2	goosecoid homeobox 2
O15503	0.4867	INSIG1	insulin induced gene 1
O15504	0.51515	NUP42	nucleoporin 42
O15511	0.4392	ARPC5	actin related protein 2/3 complex subunit 5
O15514	0.40739	POLR2D	RNA polymerase II subunit D
O15516	0.637534	CLOCK	clock circadian regulator
O15519	0.456918	CFLAR	CASP8 and FADD like apoptosis regulator
O15520	0.37919	FGF10	fibroblast growth factor 10
O15522	0.58087	NKX2-8	NK2 homeobox 8
O15523	0.797562	DDX3Y	DEAD-box helicase 3 Y-linked
O15524	0.41475	SOCS1	suppressor of cytokine signaling 1
O15525	0.70887	MAFG	MAF bZIP transcription factor G
O15527	0.7322	OGG1	8-oxoguanine DNA glycosylase
O15528	0.34045	CYP27B1	cytochrome P450 family 27 subfamily B member 1
O15529	0.57603	GPR42	G protein-coupled receptor 42
O15530	0.50209	PDPK1	3-phosphoinositide dependent protein kinase 1
O15533	0.42786	TAPBP	TAP binding protein
O15534	0.408248	PER1	period circadian regulator 1
O15535	0.404518	ZSCAN9	zinc finger and SCAN domain containing 9
O15537	0.49974	RS1	retinoschisin 1
O15539	0.50277	RGS5	regulator of G protein signaling 5
O15540	0.52406	FABP7	fatty acid binding protein 7
O15541	0.446313	RNF113A	ring finger protein 113A
O15547	0.30545	P2RX6	purinergic receptor P2X 6
O15550	0.466249	KDM6A	lysine demethylase 6A
O15551	0.53295	CLDN3	claudin 3
O15552	0.5596	FFAR2	free fatty acid receptor 2
O15553	0.490076	MEFV	MEFV innate immunity regulator, pyrin
O15554	0.527826	KCNN4	potassium calcium-activated channel subfamily N member 4
O43143	0.850167	DHX15	DEAH-box helicase 15
O43147	0.377008	SGSM2	small G protein signaling modulator 2
O43148	0.66948	RNMT	RNA guanine-7 methyltransferase
O43150	0.499125	ASAP2	ArfGAP with SH3 domain, ankyrin repeat and PH domain 2
O43151	0.393444	TET3	tet methylcytosine dioxygenase 3
O43155	0.61119	FLRT2	fibronectin leucine rich transmembrane protein 2
O43156	0.478108	TTI1	TELO2 interacting protein 1
O43157	0.415484	PLXNB1	plexin B1
O43159	0.6511	RRP8	ribosomal RNA processing 8
O43164	0.41246	PJA2	praja ring finger ubiquitin ligase 2
O43166	0.355867	SIPA1L1	signal induced proliferation associated 1 like 1
O43167	0.36326	ZBTB24	zinc finger and BTB domain containing 24
O43169	0.39907	CYB5B	cytochrome b5 type B
O43172	0.718429	PRPF4	pre-mRNA processing factor 4
O43173	0.52078	ST8SIA3	ST8 alpha-N-acetyl-neuraminide alpha-2,8-sialyltransferase 3
O43174	0.32273	CYP26A1	cytochrome P450 family 26 subfamily A member 1
O43175	0.84805	PHGDH	phosphoglycerate dehydrogenase
O43181	0.37061	NDUFS4	NADH:ubiquinone oxidoreductase subunit S4
O43182	0.37555	ARHGAP6	Rho GTPase activating protein 6
O43184	0.34867	ADAM12	ADAM metallopeptidase domain 12
O43186	0.6034	CRX	cone-rod homeobox
O43187	0.500042	IRAK2	interleukin 1 receptor associated kinase 2
O43189	0.35451	PHF1	PHD finger protein 1
O43193	0.5482	MLNR	motilin receptor
O43194	0.55761	GPR39	G protein-coupled receptor 39
O43196	0.547246	MSH5	mutS homolog 5
O43236	0.54122	SEPTIN4	septin 4
O43237	0.6297	DYNC1LI2	dynein cytoplasmic 1 light intermediate chain 2
O43240	0.71407	KLK10	kallikrein related peptidase 10
O43242	0.50259	PSMD3	proteasome 26S subunit, non-ATPase 3
O43246	0.77642	SLC7A4	solute carrier family 7 member 4
O43248	0.60538	HOXC11	homeobox C11
O43251	0.65563	RBFOX2	RNA binding fox-1 homolog 2
O43252	0.9234	PAPSS1	3'-phosphoadenosine 5'-phosphosulfate synthase 1
O43255	0.38924	SIAH2	siah E3 ubiquitin protein ligase 2
O43257	0.4062	ZNHIT1	zinc finger HIT-type containing 1
O43264	0.420459	ZW10	zw10 kinetochore protein
O43272	0.56568	PRODH	proline dehydrogenase 1
O43278	0.38247	SPINT1	serine peptidase inhibitor, Kunitz type 1
O43280	0.86481	TREH	trehalase
O43281	0.648257	EFS	embryonal Fyn-associated substrate
O43283	0.605038	MAP3K13	mitogen-activated protein kinase kinase kinase 13
O43286	0.583289	B4GALT5	beta-1,4-galactosyltransferase 5
O43290	0.479424	SART1	spliceosome associated factor 1, recruiter of U4/U6.U5 tri-snRNP
O43291	0.40076	SPINT2	serine peptidase inhibitor, Kunitz type 2
O43292	0.3885	GPAA1	glycosylphosphatidylinositol anchor attachment 1
O43293	0.59701	DAPK3	death associated protein kinase 3
O43294	0.336701	TGFB1I1	transforming growth factor beta 1 induced transcript 1
O43295	0.408857	SRGAP3	SLIT-ROBO Rho GTPase activating protein 3
O43296	0.392346	ZNF264	zinc finger protein 264
O43298	0.433464	ZBTB43	zinc finger and BTB domain containing 43
O43299	0.43101	AP5Z1	adaptor related protein complex 5 subunit zeta 1
O43300	0.58842	LRRTM2	leucine rich repeat transmembrane neuronal 2
O43301	0.67366	HSPA12A	heat shock protein family A (Hsp70) member 12A
O43303	0.64937	CCP110	centriolar coiled-coil protein 110
O43304	0.520439	SEC14L5	SEC14 like lipid binding 5
O43306	0.377868	ADCY6	adenylate cyclase 6
O43307	0.398868	ARHGEF9	Cdc42 guanine nucleotide exchange factor 9
O43309	0.367448	ZSCAN12	zinc finger and SCAN domain containing 12
O43310	0.43666	CTIF	cap binding complex dependent translation initiation factor
O43312	0.51056	MTSS1	MTSS I-BAR domain containing 1
O43313	0.460433	ATMIN	ATM interactor
O43314	0.589118	PPIP5K2	diphosphoinositol pentakisphosphate kinase 2
O43315	0.91653	AQP9	aquaporin 9
O43316	0.634213	PAX4	paired box 4
O43318	0.576228	MAP3K7	mitogen-activated protein kinase kinase kinase 7
O43320	0.35432	FGF16	fibroblast growth factor 16
O43323	0.430008	DHH	desert hedgehog signaling molecule
O43324	0.65126	EEF1E1	eukaryotic translation elongation factor 1 epsilon 1
O43325	0.54241	LYRM1	LYR motif containing 1
O43345	0.421122	ZNF208	zinc finger protein 208
O43347	0.646673	MSI1	musashi RNA binding protein 1
O43353	0.522399	RIPK2	receptor interacting serine/threonine kinase 2
O43361	0.41616	ZNF749	zinc finger protein 749
O43364	0.60106	HOXA2	homeobox A2
O43365	0.59448	HOXA3	homeobox A3
O43374	0.34927	RASA4	RAS p21 protein activator 4
O43379	0.401134	WDR62	WD repeat domain 62
O43390	0.481106	HNRNPR	heterogeneous nuclear ribonucleoprotein R
O43395	0.503905	PRPF3	pre-mRNA processing factor 3
O43396	0.646108	TXNL1	thioredoxin like 1
O43402	0.44248	EMC8	ER membrane protein complex subunit 8
O43405	0.635633	COCH	cochlin
O43414	0.71524	ERI3	ERI1 exoribonuclease family member 3
O43422	0.35427	THAP12	THAP domain containing 12
O43423	0.46811	ANP32C	Acidic leucine-rich nuclear phosphoprotein 32 family member C (Phosphoprotein 32-related protein 1) (Tumorigenic protein pp32r1)
O43424	0.625739	GRID2	glutamate ionotropic receptor delta type subunit 2
O43426	0.22178	SYNJ1	synaptojanin 1
O43427	0.36578	FIBP	FGF1 intracellular binding protein
O43432	0.471926	EIF4G3	eukaryotic translation initiation factor 4 gamma 3
O43435	0.47761	TBX1	T-box transcription factor 1
O43439	0.698446	CBFA2T2	CBFA2/RUNX1 partner transcriptional co-repressor 2
O43447	0.81601	PPIH	peptidylprolyl isomerase H
O43448	0.85882	KCNAB3	potassium voltage-gated channel subfamily A regulatory beta subunit 3
O43451	0.776775	MGAM	maltase-glucoamylase
O43462	0.31922	MBTPS2	membrane bound transcription factor peptidase, site 2
O43463	0.51109	SUV39H1	SUV39H1 histone lysine methyltransferase
O43464	0.65234	HTRA2	HtrA serine peptidase 2
O43474	0.3433	KLF4	KLF transcription factor 4
O43482	0.5832	OIP5	Opa interacting protein 5
O43488	0.81321	AKR7A2	aldo-keto reductase family 7 member A2
O43490	0.47328	PROM1	prominin 1
O43491	0.375075	EPB41L2	erythrocyte membrane protein band 4.1 like 2
O43497	0.20326	CACNA1G	calcium voltage-gated channel subunit alpha1 G
O43502	0.667022	RAD51C	RAD51 paralog C
O43504	0.54938	LAMTOR5	late endosomal/lysosomal adaptor, MAPK and MTOR activator 5
O43505	0.577163	B4GAT1	beta-1,4-glucuronyltransferase 1
O43506	0.340933	ADAM20	ADAM metallopeptidase domain 20
O43508	0.4886	TNFSF12	TNF superfamily member 12
O43511	0.74096	SLC26A4	solute carrier family 26 member 4
O43513	0.470817	MED7	mediator complex subunit 7
O43520	0.612193	ATP8B1	ATPase phospholipid transporting 8B1
O43524	0.59018	FOXO3	forkhead box O3
O43525	0.496093	KCNQ3	potassium voltage-gated channel subfamily Q member 3
O43526	0.506954	KCNQ2	potassium voltage-gated channel subfamily Q member 2
O43529	0.37135	CHST10	carbohydrate sulfotransferase 10
O43541	0.33435	SMAD6	SMAD family member 6
O43542	0.675623	XRCC3	X-ray repair cross complementing 3
O43543	0.64974	XRCC2	X-ray repair cross complementing 2
O43548	0.25996	TGM5	transglutaminase 5
O43556	0.42566	SGCE	sarcoglycan epsilon
O43557	0.50498	TNFSF14	TNF superfamily member 14
O43559	0.51938	FRS3	fibroblast growth factor receptor substrate 3
O43566	0.43511	RGS14	regulator of G protein signaling 14
O43567	0.475485	RNF13	ring finger protein 13
O43570	0.33482	CA12	carbonic anhydrase 12
O43572	0.40439	AKAP10	A-kinase anchoring protein 10
O43581	0.508545	SYT7	synaptotagmin 7
O43583	0.75765	DENR	density regulated re-initiation and release factor
O43586	0.543679	PSTPIP1	proline-serine-threonine phosphatase interacting protein 1
O43592	0.33229	XPOT	exportin for tRNA
O43593	0.394663	HR	HR lysine demethylase and nuclear receptor corepressor
O43597	0.39611	SPRY2	sprouty RTK signaling antagonist 2
O43598	0.62035	DNPH1	2'-deoxynucleoside 5'-phosphate N-hydrolase 1
O43602	0.542526	DCX	doublecortin
O43603	0.58297	GALR2	galanin receptor 2
O43609	0.40316	SPRY1	sprouty RTK signaling antagonist 1
O43610	0.38601	SPRY3	sprouty RTK signaling antagonist 3
O43613	0.56551	HCRTR1	hypocretin receptor 1
O43614	0.56611	HCRTR2	hypocretin receptor 2
O43615	0.595269	TIMM44	translocase of inner mitochondrial membrane 44
O43617	0.43766	TRAPPC3	trafficking protein particle complex subunit 3
O43623	0.33289	SNAI2	snail family transcriptional repressor 2
O43633	0.61909	CHMP2A	charged multivesicular body protein 2A
O43638	0.58164	FOXS1	forkhead box S1
O43639	0.584473	NCK2	NCK adaptor protein 2
O43653	0.3933	PSCA	prostate stem cell antigen
O43657	0.45529	TSPAN6	tetraspanin 6
O43660	0.82332	PLRG1	pleiotropic regulator 1
O43663	0.53596	PRC1	protein regulator of cytokinesis 1
O43665	0.47585	RGS10	regulator of G protein signaling 10
O43670	0.3989	ZNF207	zinc finger protein 207
O43674	0.3617	NDUFB5	NADH:ubiquinone oxidoreductase subunit B5
O43676	0.4695	NDUFB3	NADH:ubiquinone oxidoreductase subunit B3
O43677	0.69353	NDUFC1	NADH:ubiquinone oxidoreductase subunit C1
O43678	0.53337	NDUFA2	NADH:ubiquinone oxidoreductase subunit A2
O43679	0.60667	LDB2	LIM domain binding 2
O43680	0.55936	TCF21	transcription factor 21
O43681	0.68972	GET3	guided entry of tail-anchored proteins factor 3, ATPase
O43683	0.571515	BUB1	BUB1 mitotic checkpoint serine/threonine kinase
O43684	0.81199	BUB3	BUB3 mitotic checkpoint protein
O43688	0.54803	PLPP2	phospholipid phosphatase 2
O43692	0.37118	PI15	peptidase inhibitor 15
O43699	0.4144	SIGLEC6	sialic acid binding Ig like lectin 6
O43704	0.42784	SULT1B1	sulfotransferase family 1B member 1
O43707	0.458838	ACTN4	actinin alpha 4
O43708	0.8274	GSTZ1	glutathione S-transferase zeta 1
O43709	0.73135	BUD23	BUD23 rRNA methyltransferase and ribosome maturation factor
O43711	0.62749	TLX3	T cell leukemia homeobox 3
O43715	0.51336	TRIAP1	TP53 regulated inhibitor of apoptosis 1
O43716	0.37341	GATC	glutamyl-tRNA amidotransferase subunit C
O43719	0.526751	HTATSF1	HIV-1 Tat specific factor 1
O43731	0.44288	KDELR3	KDEL endoplasmic reticulum protein retention receptor 3
O43734	0.58544	TRAF3IP2	TRAF3 interacting protein 2
O43736	0.44255	ITM2A	integral membrane protein 2A
O43739	0.47582	CYTH3	cytohesin 3
O43741	0.43999	PRKAB2	protein kinase AMP-activated non-catalytic subunit beta 2
O43745	0.34691	CHP2	calcineurin like EF-hand protein 2
O43747	0.482437	AP1G1	adaptor related protein complex 1 subunit gamma 1
O43749	0.56994	OR1F1	olfactory receptor family 1 subfamily F member 1
O43752	0.706505	STX6	syntaxin 6
O43759	0.55063	SYNGR1	synaptogyrin 1
O43760	0.55961	SYNGR2	synaptogyrin 2
O43761	0.5799	SYNGR3	synaptogyrin 3
O43763	0.59364	TLX2	T cell leukemia homeobox 2
O43765	0.692911	SGTA	small glutamine rich tetratricopeptide repeat co-chaperone alpha
O43766	0.86889	LIAS	lipoic acid synthetase
O43772	0.47835	SLC25A20	solute carrier family 25 member 20
O43776	0.796065	NARS1	asparaginyl-tRNA synthetase 1
O43781	0.52861	DYRK3	dual specificity tyrosine phosphorylation regulated kinase 3
O43790	0.795145	KRT86	keratin 86
O43791	0.453521	SPOP	speckle type BTB/POZ protein
O43795	0.370782	MYO1B	myosin IB
O43805	0.73594	SSNA1	SS nuclear autoantigen 1
O43808	0.5144	SLC25A17	solute carrier family 25 member 17
O43809	0.55271	NUDT21	nudix hydrolase 21
O43812	0.600312	DUX1	double homeobox 1
O43813	0.57521	LANCL1	LanC like glutathione S-transferase 1
O43815	0.812484	STRN	striatin
O43818	0.81731	RRP9	ribosomal RNA processing 9, U3 small nucleolar RNA binding protein
O43819	0.59411	SCO2	synthesis of cytochrome C oxidase 2
O43820	0.55342	HYAL3	hyaluronidase 3
O43822	0.43802	CFAP410	cilia and flagella associated protein 410
O43823	0.41325	AKAP8	A-kinase anchoring protein 8
O43824	0.74267	GTPBP6	GTP binding protein 6 (putative)
O43825	0.53701	B3GALT2	beta-1,3-galactosyltransferase 2
O43826	0.90774	SLC37A4	solute carrier family 37 member 4
O43827	0.506695	ANGPTL7	angiopoietin like 7
O43829	0.32815	ZBTB14	zinc finger and BTB domain containing 14
O43837	0.86726	IDH3B	isocitrate dehydrogenase (NAD(+)) 3 non-catalytic subunit beta
O43847	0.91733	NRDC	nardilysin convertase
O43852	0.34768	CALU	calumenin
O43854	0.311743	EDIL3	EGF like repeats and discoidin domains 3
O43861	0.654518	ATP9B	ATPase phospholipid transporting 9B (putative)
O43865	0.54088	AHCYL1	adenosylhomocysteinase like 1
O43866	0.3731	CD5L	CD5 molecule like
O43868	0.818849	SLC28A2	solute carrier family 28 member 2
O43869	0.57024	OR2T1	olfactory receptor family 2 subfamily T member 1
O43889	0.69811	CREB3	cAMP responsive element binding protein 3
O43895	0.50707	XPNPEP2	X-prolyl aminopeptidase 2
O43896	0.407703	KIF1C	kinesin family member 1C
O43897	0.418912	TLL1	tolloid like 1
O43900	0.356722	PRICKLE3	prickle planar cell polarity protein 3
O43903	0.40786	GAS2	growth arrest specific 2
O43909	0.498048	EXTL3	exostosin like glycosyltransferase 3
O43913	0.608589	ORC5	origin recognition complex subunit 5
O43915	0.340813	VEGFD	vascular endothelial growth factor D
O43916	0.45104	CHST1	carbohydrate sulfotransferase 1
O43918	0.42161	AIRE	autoimmune regulator
O43920	0.38078	NDUFS5	NADH:ubiquinone oxidoreductase subunit S5
O43921	0.49028	EFNA2	ephrin A2
O43924	0.54826	PDE6D	phosphodiesterase 6D
O43927	0.51175	CXCL13	C-X-C motif chemokine ligand 13
O43929	0.600828	ORC4	origin recognition complex subunit 4
O43930	0.58909	PRKY	protein kinase Y-linked (pseudogene)
O43933	0.654457	PEX1	peroxisomal biogenesis factor 1
O43934	0.80868	MFSD11	major facilitator superfamily domain containing 11
O60216	0.532051	RAD21	RAD21 cohesin complex component
O60218	0.82274	AKR1B10	aldo-keto reductase family 1 member B10
O60220	0.51815	TIMM8A	translocase of inner mitochondrial membrane 8A
O60224	0.47066	SSX4	SSX family member 4
O60225	0.48841	SSX5	SSX family member 5
O60231	0.766963	DHX16	DEAH-box helicase 16
O60232	0.591453	ZNRD2	zinc ribbon domain containing 2
O60234	0.4237	GMFG	glia maturation factor gamma
O60235	0.49924	TMPRSS11D	transmembrane serine protease 11D
O60237	0.524014	PPP1R12B	protein phosphatase 1 regulatory subunit 12B
O60239	0.46547	SH3BP5	SH3 domain binding protein 5
O60240	0.596781	PLIN1	perilipin 1
O60241	0.457553	ADGRB2	adhesion G protein-coupled receptor B2
O60242	0.449347	ADGRB3	adhesion G protein-coupled receptor B3
O60243	0.37247	HS6ST1	heparan sulfate 6-O-sulfotransferase 1
O60244	0.350347	MED14	mediator complex subunit 14
O60245	0.51156	PCDH7	protocadherin 7
O60248	0.43259	SOX15	SRY-box transcription factor 15
O60256	0.94742	PRPSAP2	phosphoribosyl pyrophosphate synthetase associated protein 2
O60258	0.36691	FGF17	fibroblast growth factor 17
O60259	0.72508	KLK8	kallikrein related peptidase 8
O60260	0.378552	PRKN	parkin RBR E3 ubiquitin protein ligase
O60262	0.47575	GNG7	G protein subunit gamma 7
O60264	0.561137	SMARCA5	SWI/SNF related, matrix associated, actin dependent regulator of chromatin, subfamily a, member 5
O60266	0.38992	ADCY3	adenylate cyclase 3
O60268	0.42655	KIAA0513	KIAA0513
O60271	0.64898	SPAG9	sperm associated antigen 9
O60279	0.443269	SUSD5	sushi domain containing 5
O60282	0.544089	KIF5C	kinesin family member 5C
O60284	0.619029	ST18	ST18 C2H2C-type zinc finger transcription factor
O60285	0.55056	NUAK1	NUAK family kinase 1
O60287	0.445847	URB1	URB1 ribosome biogenesis homolog
O60290	0.393973	ZNF862	zinc finger protein 862
O60291	0.32819	MGRN1	mahogunin ring finger 1
O60292	0.356143	SIPA1L3	signal induced proliferation associated 1 like 3
O60293	0.584038	ZFC3H1	zinc finger C3H1-type containing
O60294	0.40341	LCMT2	leucine carboxyl methyltransferase 2
O60296	0.798955	TRAK2	trafficking kinesin protein 2
O60299	0.697012	LZTS3	leucine zipper tumor suppressor family member 3
O60303	0.408295	KATNIP	katanin interacting protein
O60304	0.355146	ZNF500	zinc finger protein 500
O60306	0.49642	AQR	aquarius intron-binding spliceosomal factor
O60307	0.530128	MAST3	microtubule associated serine/threonine kinase 3
O60308	0.480226	CEP104	centrosomal protein 104
O60309	0.60571	LRRC37A3	leucine rich repeat containing 37 member A3
O60312	0.650178	ATP10A	ATPase phospholipid transporting 10A (putative)
O60313	0.45742	OPA1	OPA1 mitochondrial dynamin like GTPase
O60315	0.51725	ZEB2	zinc finger E-box binding homeobox 2
O60318	0.381799	MCM3AP	minichromosome maintenance complex component 3 associated protein
O60320	0.58068	ENTREP2	endosomal transmembrane epsin interactor 2
O60330	0.443653	PCDHGA12	protocadherin gamma subfamily A, 12
O60331	0.42519	PIP5K1C	phosphatidylinositol-4-phosphate 5-kinase type 1 gamma
O60333	0.376418	KIF1B	kinesin family member 1B
O60336	0.417224	MAPKBP1	mitogen-activated protein kinase binding protein 1
O60337	0.40147	MARCHF6	membrane associated ring-CH-type finger 6
O60341	0.57507	KDM1A	lysine demethylase 1A
O60343	0.406116	TBC1D4	TBC1 domain family member 4
O60346	0.321076	PHLPP1	PH domain and leucine rich repeat protein phosphatase 1
O60347	0.34726	TBC1D12	TBC1 domain family member 12
O60353	0.479644	FZD6	frizzled class receptor 6
O60359	0.62614	CACNG3	calcium voltage-gated channel auxiliary subunit gamma 3
O60361	0.87381	NME2P1	NME2 pseudogene 1
O60381	0.438145	HBP1	HMG-box transcription factor 1
O60383	0.32371	GDF9	growth differentiation factor 9
O60391	0.623096	GRIN3B	glutamate ionotropic receptor NMDA type subunit 3B
O60393	0.57443	NOBOX	NOBOX oogenesis homeobox
O60403	0.56906	OR10H2	olfactory receptor family 10 subfamily H member 2
O60404	0.53682	OR10H3	olfactory receptor family 10 subfamily H member 3
O60412	0.56348	OR7C2	olfactory receptor family 7 subfamily C member 2
O60422	0.36924	ONECUT3	one cut homeobox 3
O60423	0.627478	ATP8B3	ATPase phospholipid transporting 8B3
O60427	0.33389	FADS1	fatty acid desaturase 1
O60431	0.57122	OR1I1	olfactory receptor family 1 subfamily I member 1
O60437	0.512517	PPL	periplakin
O60443	0.367204	GSDME	gasdermin E
O60447	0.431226	EVI5	ecotropic viral integration site 5
O60449	0.363206	LY75	lymphocyte antigen 75
O60462	0.488088	NRP2	neuropilin 2
O60469	0.518613	DSCAM	DS cell adhesion molecule
O60476	0.65052	MAN1A2	mannosidase alpha class 1A member 2
O60477	0.393533	BRINP1	BMP/retinoic acid inducible neural specific 1
O60478	0.61108	GPR137B	G protein-coupled receptor 137B
O60479	0.60298	DLX3	distal-less homeobox 3
O60481	0.33396	ZIC3	Zic family member 3
O60486	0.510397	PLXNC1	plexin C1
O60487	0.678402	MPZL2	myelin protein zero like 2
O60488	0.714397	ACSL4	acyl-CoA synthetase long chain family member 4
O60493	0.4748	SNX3	sorting nexin 3
O60496	0.479768	DOK2	docking protein 2
O60499	0.65859	STX10	syntaxin 10
O60500	0.525794	NPHS1	NPHS1 adhesion molecule, nephrin
O60502	0.67145	OGA	O-GlcNAcase
O60503	0.386048	ADCY9	adenylate cyclase 9
O60504	0.673172	SORBS3	sorbin and SH3 domain containing 3
O60506	0.478685	SYNCRIP	synaptotagmin binding cytoplasmic RNA interacting protein
O60507	0.41664	TPST1	tyrosylprotein sulfotransferase 1
O60508	0.621662	CDC40	cell division cycle 40
O60512	0.51407	B4GALT3	beta-1,4-galactosyltransferase 3
O60513	0.56466	B4GALT4	beta-1,4-galactosyltransferase 4
O60516	0.34729	EIF4EBP3	eukaryotic translation initiation factor 4E binding protein 3
O60518	0.440447	RANBP6	RAN binding protein 6
O60519	0.76252	CREBL2	cAMP responsive element binding protein like 2
O60522	0.365883	TDRD6	tudor domain containing 6
O60524	0.411764	NEMF	nuclear export mediator factor
O60542	0.358	PSPN	persephin
O60543	0.59141	CIDEA	cell death inducing DFFA like effector a
O60547	0.92201	GMDS	GDP-mannose 4,6-dehydratase
O60548	0.58952	FOXD2	forkhead box D2
O60551	0.55148	NMT2	N-myristoyltransferase 2
O60563	0.35095	CCNT1	cyclin T1
O60565	0.35711	GREM1	gremlin 1, DAN family BMP antagonist
O60566	0.543091	BUB1B	BUB1 mitotic checkpoint serine/threonine kinase B
O60568	0.53435	PLOD3	procollagen-lysine,2-oxoglutarate 5-dioxygenase 3
O60573	0.46027	EIF4E2	eukaryotic translation initiation factor 4E family member 2
O60575	0.46089	SPINK4	serine peptidase inhibitor Kazal type 4
O60583	0.3545	CCNT2	cyclin T2
O60602	0.480603	TLR5	toll like receptor 5
O60603	0.468157	TLR2	toll like receptor 2
O60609	0.34725	GFRA3	GDNF family receptor alpha 3
O60610	0.55713	DIAPH1	diaphanous related formin 1
O60635	0.41288	TSPAN1	tetraspanin 1
O60636	0.48004	TSPAN2	tetraspanin 2
O60637	0.4427	TSPAN3	tetraspanin 3
O60641	0.43554	SNAP91	synaptosome associated protein 91
O60645	0.364073	EXOC3	exocyst complex component 3
O60656	0.56079	UGT1A9	UDP glucuronosyltransferase family 1 member A9
O60658	0.476292	PDE8A	phosphodiesterase 8A
O60662	0.44283	KLHL41	kelch like family member 41
O60663	0.438277	LMX1B	LIM homeobox transcription factor 1 beta
O60664	0.569825	PLIN3	perilipin 3
O60667	0.647113	FCMR	Fc mu receptor
O60669	0.87707	SLC16A7	solute carrier family 16 member 7
O60671	0.54696	RAD1	RAD1 checkpoint DNA exonuclease
O60674	0.573623	JAK2	Janus kinase 2
O60675	0.7066	MAFK	MAF bZIP transcription factor K
O60676	0.49014	CST8	cystatin 8
O60678	0.458632	PRMT3	protein arginine methyltransferase 3
O60682	0.56222	MSC	musculin
O60683	0.386702	PEX10	peroxisomal biogenesis factor 10
O60684	0.50429	KPNA6	karyopherin subunit alpha 6
O60687	0.31852	SRPX2	sushi repeat containing protein X-linked 2
O60688	0.53577	YPEL1	yippee like 1
O60701	0.80853	UGDH	UDP-glucose 6-dehydrogenase
O60704	0.41449	TPST2	tyrosylprotein sulfotransferase 2
O60706	0.36031	ABCC9	ATP binding cassette subfamily C member 9
O60711	0.35346	LPXN	leupaxin
O60716	0.46248	CTNND1	catenin delta 1
O60721	0.71126	SLC24A1	solute carrier family 24 member 1
O60725	0.40312	ICMT	isoprenylcysteine carboxyl methyltransferase
O60729	0.37133	CDC14B	cell division cycle 14B
O60732	0.377141	MAGEC1	MAGE family member C1
O60733	0.38599	PLA2G6	phospholipase A2 group VI
O60739	0.78059	EIF1B	eukaryotic translation initiation factor 1B
O60741	0.443418	HCN1	hyperpolarization activated cyclic nucleotide gated potassium channel 1
O60749	0.43503	SNX2	sorting nexin 2
O60755	0.59895	GALR3	galanin receptor 3
O60759	0.5638	CYTIP	cytohesin 1 interacting protein
O60760	0.81991	HPGDS	hematopoietic prostaglandin D synthase
O60762	0.70726	DPM1	dolichyl-phosphate mannosyltransferase subunit 1, catalytic
O60763	0.534237	USO1	USO1 vesicle transport factor
O60765	0.380267	ZNF354A	zinc finger protein 354A
O60774	0.57707	FMO6P	flavin containing dimethylaniline monoxygenase 6, pseudogene
O60779	0.79654	SLC19A2	solute carrier family 19 member 2
O60783	0.92146	MRPS14	mitochondrial ribosomal protein S14
O60784	0.568023	TOM1	target of myb1 membrane trafficking protein
O60806	0.48234	TBX19	T-box transcription factor 19
O60809	0.44497	PRAMEF10	PRAME family member 10
O60810	0.4466	PRAMEF4	PRAME family member 4
O60811	0.45503	PRAMEF2	PRAME family member 2
O60812	0.62478	HNRNPCL1	heterogeneous nuclear ribonucleoprotein C like 1
O60813	0.45447	PRAMEF11	PRAME family member 11
O60814	0.44738	H2BC12	H2B clustered histone 12
O60825	0.42878	PFKFB2	6-phosphofructo-2-kinase/fructose-2,6-biphosphatase 2
O60826	0.646382	CCDC22	coiled-coil domain containing 22
O60828	0.45207	PQBP1	polyglutamine binding protein 1
O60830	0.47949	TIMM17B	translocase of inner mitochondrial membrane 17B
O60831	0.47965	PRAF2	PRA1 domain family member 2
O60832	0.72601	DKC1	dyskerin pseudouridine synthase 1
O60840	0.287366	CACNA1F	calcium voltage-gated channel subunit alpha1 F
O60841	0.560392	EIF5B	eukaryotic translation initiation factor 5B
O60844	0.37152	ZG16	zymogen granule protein 16
O60858	0.412571	TRIM13	tripartite motif containing 13
O60861	0.517991	GAS7	growth arrest specific 7
O60869	0.45757	EDF1	endothelial differentiation related factor 1
O60870	0.540673	KIN	Kin17 DNA and RNA binding protein
O60879	0.76305	DIAPH2	diaphanous related formin 2
O60880	0.45246	SH2D1A	SH2 domain containing 1A
O60882	0.457679	MMP20	matrix metallopeptidase 20
O60883	0.59588	GPR37L1	G protein-coupled receptor 37 like 1
[truncated: 16,235 more rows]

## Sheet: Homo_sapiens_to_Mjannaschii
UniProt ID	Structural Conservative Scores	Gene Symbol	Gene Full Name
A0A024RBG1	0.71283	NUDT4B	nudix hydrolase 4B
A0A075B6H5	0.48521	TRBV20OR9-2	T cell receptor beta variable 20/OR9-2 (non-functional)
A0A075B6H7	0.53095	IGKV3-7	immunoglobulin kappa variable 3-7 (non-functional)
A0A075B6H8	0.52277	IGKV1D-42	immunoglobulin kappa variable 1D-42 (non-functional)
A0A075B6H9	0.51203	IGLV4-69	immunoglobulin lambda variable 4-69
A0A075B6I0	0.4817	IGLV8-61	immunoglobulin lambda variable 8-61
A0A075B6I1	0.5145	IGLV4-60	immunoglobulin lambda variable 4-60
A0A075B6I3	0.50882	IGLV11-55	immunoglobulin lambda variable 11-55 (non-functional)
A0A075B6I4	0.50228	IGLV10-54	immunoglobulin lambda variable 10-54
A0A075B6I6	0.49288	IGLV1-50	immunoglobulin lambda variable 1-50 (non-functional)
A0A075B6I7	0.42303	IGLV5-48	immunoglobulin lambda variable 5-48 (non-functional)
A0A075B6I9	0.48143	IGLV7-46	immunoglobulin lambda variable 7-46
A0A075B6J1	0.49692	IGLV5-37	immunoglobulin lambda variable 5-37
A0A075B6J2	0.50874	IGLV2-33	immunoglobulin lambda variable 2-33 (non-functional)
A0A075B6J6	0.51655	IGLV3-22	immunoglobulin lambda variable 3-22
A0A075B6J9	0.53038	IGLV2-18	immunoglobulin lambda variable 2-18
A0A075B6K0	0.52274	IGLV3-16	immunoglobulin lambda variable 3-16
A0A075B6K2	0.51075	IGLV3-12	immunoglobulin lambda variable 3-12
A0A075B6K4	0.51294	IGLV3-10	immunoglobulin lambda variable 3-10
A0A075B6K5	0.50672	IGLV3-9	immunoglobulin lambda variable 3-9
A0A075B6K6	0.51884	IGLV4-3	immunoglobulin lambda variable 4-3
A0A075B6L2	0.55632	TRGV11	T cell receptor gamma variable 11 (non-functional)
A0A075B6L6	0.48996	TRBV7-3	T cell receptor beta variable 7-3
A0A075B6N1	0.4855	TRBV19	T cell receptor beta variable 19
A0A075B6N2	0.48242	TRBV20-1	T cell receptor beta variable 20-1
A0A075B6N3	0.48709	TRBV24-1	T cell receptor beta variable 24-1
A0A075B6N4	0.47736	TRBV25-1	T cell receptor beta variable 25-1
A0A075B6P5	0.52302	IGKV2-28	immunoglobulin kappa variable 2-28
A0A075B6Q5	0.49801	IGHV3-64	immunoglobulin heavy variable 3-64
A0A075B6R0	0.45493	TRGV2	T cell receptor gamma variable 2
A0A075B6R2	0.50183	IGHV4-4	immunoglobulin heavy variable 4-4
A0A075B6R9	0.52142	IGKV2D-24	immunoglobulin kappa variable 2D-24 (non-functional)
A0A075B6S2	0.52567	IGKV2D-29	immunoglobulin kappa variable 2D-29
A0A075B6S4	0.51206	IGKV1D-17	immunoglobulin kappa variable 1D-17
A0A075B6S5	0.51618	IGKV1-27	immunoglobulin kappa variable 1-27
A0A075B6S6	0.51997	IGKV2D-30	immunoglobulin kappa variable 2D-30
A0A075B6S9	0.51532	IGKV1-37	immunoglobulin kappa variable 1-37 (non-functional)
A0A075B6T6	0.53062	TRAV12-2	T cell receptor alpha variable 12-2
A0A075B6T7	0.5027	TRAV6	T cell receptor alpha variable 6
A0A075B6T8	0.53239	TRAV9-1	T cell receptor alpha variable 9-1
A0A075B6U4	0.51619	TRAV7	T cell receptor alpha variable 7
A0A075B6U6	0.53963	TRAV8-7	T cell receptor alpha variable 8-7 (pseudogene)
A0A075B6V5	0.53356	TRAV36DV7	T cell receptor alpha variable 36/delta variable 7
A0A075B6W5	0.49922	TRAV23DV6	T cell receptor alpha variable 23/delta variable 6
A0A075B6X5	0.5366	TRAV18	T cell receptor alpha variable 18
A0A075B734	0.54465	AQP7B	aquaporin 7B
A0A075B759	0.35303	PPIAL4E	peptidylprolyl isomerase A like 4E
A0A075B767	0.35484	PPIAL4H	peptidylprolyl isomerase A like 4H
A0A075B7B6	0.50257	IGHV4OR15-8	immunoglobulin heavy variable 4/OR15-8 (non-functional)
A0A075B7B8	0.47023	IGHV3OR16-12	immunoglobulin heavy variable 3/OR16-12 (non-functional)
A0A075B7D0	0.49049	IGHV1OR15-1	immunoglobulin heavy variable 1/OR15-1 (non-functional)
A0A075B7D4	0.52133	IGKV1OR2-108	immunoglobulin kappa variable 1/OR2-108 (non-functional)
A0A075B7D8	0.48538	IGHV3OR15-7	immunoglobulin heavy variable 3/OR15-7 (pseudogene)
A0A075B7E8	0.48668	IGHV3OR16-13	immunoglobulin heavy variable 3/OR16-13 (non-functional)
A0A075B7F0	0.49089	IGHV3OR16-10	immunoglobulin heavy variable 3/OR16-10 (non-functional)
A0A075B7F1	0.48965	IGHV3OR16-8	immunoglobulin heavy variable 3/OR16-8 (non-functional)
A0A087WSX0	0.5098	IGLV5-45	immunoglobulin lambda variable 5-45
A0A087WSY4	0.50032	IGHV4-30-2	immunoglobulin heavy variable 4-30-2
A0A087WSY6	0.51555	IGKV3D-15	immunoglobulin kappa variable 3D-15
A0A087WSZ0	0.51736	IGKV1D-8	immunoglobulin kappa variable 1D-8
A0A087WSZ9	0.50269	TRAV30	T cell receptor alpha variable 30
A0A087WT01	0.46765	TRAV27	T cell receptor alpha variable 27
A0A087WT02	0.52755	TRAV9-2	T cell receptor alpha variable 9-2
A0A087WT03	0.5077	TRAV26-1	T cell receptor alpha variable 26-1
A0A087WUV0	0.298002	LOC344065	Zinc finger protein 2
A0A087WV53	0.56168	SPEGNB	SPEG neighbor
A0A087WV62	0.485	TRBV16	T cell receptor beta variable 16
A0A087WVF3	0.41375	TBC1D3D	TBC1 domain family member 3D
A0A087WW49	0.50076		Ig-like domain-containing protein
A0A087WW87	0.52853	IGKV2-40	immunoglobulin kappa variable 2-40
A0A087WX78	0.42119
A0A087WXS9	0.35881	TBC1D3I	TBC1 domain family member 3I
A0A087WYE8	0.49417	IGHV1OR21-1	immunoglobulin heavy variable 1/OR21-1 (non-functional)
A0A087WZ39	0.48589	TRBV15	T cell receptor beta variable 15
A0A087X0K7	0.48314	TRBV17	T cell receptor beta variable 17 (non-functional)
A0A087X0M5	0.47959	TRBV18	T cell receptor beta variable 18
A0A087X179	0.36059	TBC1D3E	TBC1 domain family member 3E
A0A087X1C5	0.31158	CYP2D7	cytochrome P450 family 2 subfamily D member 7 (gene/pseudogene)
A0A087X1G2	0.38335	TBC1D3K	TBC1 domain family member 3K
A0A087X1L8	0.57047	LOC102723996	Ig-like domain-containing protein
A0A096LNW5	0.312486	NOTCH2NLR	notch 2 N-terminal like R
A0A096LP49	0.87749	CCDC187	coiled-coil domain containing 187
A0A096LP55	0.53971	UQCRHL	ubiquinol-cytochrome c reductase hinge protein like
A0A096LPH7	0.54069		TRAPPC10 domain-containing protein
A0A096LPK6	0.44812		Exostosin domain-containing protein
A0A096LPK9	0.38372	OR4N4C	olfactory receptor family 4 subfamily N member 4C
A0A0A0MRZ7	0.51206	IGKV2D-26	immunoglobulin kappa variable 2D-26
A0A0A0MRZ8	0.51881	IGKV3D-11	immunoglobulin kappa variable 3D-11
A0A0A0MRZ9	0.50484	IGLV5-52	immunoglobulin lambda variable 5-52
A0A0A0MS00	0.49152	IGLV3-32	immunoglobulin lambda variable 3-32 (non-functional)
A0A0A0MS01	0.50955	TRGV10	T cell receptor gamma variable 10 (non-functional)
A0A0A0MS02	0.44788	TRGV1	T cell receptor gamma variable 1 (non-functional)
A0A0A0MS03	0.4996	TRBV5-3	T cell receptor beta variable 5-3 (non-functional)
A0A0A0MS04	0.48576	TRBV6-7	T cell receptor beta variable 6-7 (non-functional)
A0A0A0MS05	0.50384	TRBV5-7	T cell receptor beta variable 5-7 (non-functional)
A0A0A0MS06	0.47535	TRBV23-1	T cell receptor beta variable 23-1 (non-functional)
A0A0A0MS14	0.50163	IGHV1-45	immunoglobulin heavy variable 1-45
A0A0A0MS15	0.48795	IGHV3-49	immunoglobulin heavy variable 3-49
A0A0A0MT36	0.52133	IGKV6D-21	immunoglobulin kappa variable 6D-21 (non-functional)
A0A0A6YYC5	0.53108	TRAV14DV4	T cell receptor alpha variable 14/delta variable 4
A0A0A6YYD4	0.49746	TRBV13	T cell receptor beta variable 13
A0A0A6YYG2	0.49057	TRBV6-6	T cell receptor beta variable 6-6
A0A0A6YYG3	0.48082	TRBV6-8	T cell receptor beta variable 6-8
A0A0A6YYJ7	0.49471	TRAV8-3	T cell receptor alpha variable 8-3
A0A0A6YYK1	0.49331	TRAV8-1	T cell receptor alpha variable 8-1
A0A0A6YYK4	0.46269	TRBV7-1	T cell receptor beta variable 7-1 (non-functional)
A0A0A6YYK6	0.50817	TRAV16	T cell receptor alpha variable 16
A0A0A6YYK7	0.52901	TRAV19	T cell receptor alpha variable 19
A0A0A6YYL3	0.575797	POTEB	POTE ankyrin domain family member B
A0A0B4J1T7	0.40911	LY6G6E	lymphocyte antigen 6 family member G6E (pseudogene)
A0A0B4J1U3	0.50131	IGLV1-36	immunoglobulin lambda variable 1-36
A0A0B4J1U4	0.45345	TRGV5	T cell receptor gamma variable 5
A0A0B4J1U6	0.49665	TRBV9	T cell receptor beta variable 9
A0A0B4J1U7	0.49906	IGHV6-1	immunoglobulin heavy variable 6-1
A0A0B4J1V0	0.48945	IGHV3-15	immunoglobulin heavy variable 3-15
A0A0B4J1V1	0.486	IGHV3-21	immunoglobulin heavy variable 3-21
A0A0B4J1V2	0.50667	IGHV2-26	immunoglobulin heavy variable 2-26
A0A0B4J1V6	0.48793	IGHV3-73	immunoglobulin heavy variable 3-73
A0A0B4J1V7	0.48562	IGHV7-81	immunoglobulin heavy variable 7-81 (non-functional)
A0A0B4J1W7	0.84326	NPIPA9	nuclear pore complex interacting protein family, member A9
A0A0B4J1X5	0.48936	IGHV3-74	immunoglobulin heavy variable 3-74
A0A0B4J1X8	0.49457	IGHV3-43	immunoglobulin heavy variable 3-43
A0A0B4J1Y8	0.50557	IGLV9-49	immunoglobulin lambda variable 9-49
A0A0B4J1Y9	0.48628	IGHV3-72	immunoglobulin heavy variable 3-72
A0A0B4J1Z2	0.52306	IGKV1D-43	immunoglobulin kappa variable 1D-43
A0A0B4J234	0.49192	TRAV2	T cell receptor alpha variable 2
A0A0B4J235	0.46407	TRAV13-2	T cell receptor alpha variable 13-2
A0A0B4J237	0.50168	TRAV8-2	T cell receptor alpha variable 8-2
A0A0B4J238	0.51124	TRAV1-2	T cell receptor alpha variable 1-2
A0A0B4J240	0.52651	TRAV10	T cell receptor alpha variable 10
A0A0B4J241	0.49874	TRAV13-1	T cell receptor alpha variable 13-1
A0A0B4J244	0.53599	TRAV3	T cell receptor alpha variable 3
A0A0B4J245	0.49397	TRAV12-1	T cell receptor alpha variable 12-1
A0A0B4J248	0.53027	TRAV1-1	T cell receptor alpha variable 1-1
A0A0B4J249	0.49837	TRAV5	T cell receptor alpha variable 5
A0A0B4J262	0.54107	TRAV8-6	T cell receptor alpha variable 8-6
A0A0B4J263	0.47997	TRAV39	T cell receptor alpha variable 39
A0A0B4J264	0.54296	TRAV38-1	T cell receptor alpha variable 38-1
A0A0B4J265	0.52332	TRAV26-2	T cell receptor alpha variable 26-2
A0A0B4J266	0.48849	TRAV41	T cell receptor alpha variable 41
A0A0B4J268	0.52888	TRAV4	T cell receptor alpha variable 4
A0A0B4J271	0.47928	TRAV12-3	T cell receptor alpha variable 12-3
A0A0B4J272	0.5061	TRAV24	T cell receptor alpha variable 24
A0A0B4J273	0.48991	TRAV34	T cell receptor alpha variable 34
A0A0B4J274	0.47651	TRAV20	T cell receptor alpha variable 20
A0A0B4J275	0.46284	TRAV17	T cell receptor alpha variable 17
A0A0B4J276	0.49652	TRAV25	T cell receptor alpha variable 25
A0A0B4J277	0.51924	TRAV22	T cell receptor alpha variable 22
A0A0B4J279	0.47917	TRAV21	T cell receptor alpha variable 21
A0A0B4J280	0.56396	TRAV40	T cell receptor alpha variable 40
A0A0B4J2A2	0.35355	PPIAL4C	peptidylprolyl isomerase A like 4C
A0A0B4J2B6	0.50984	IGHV2OR16-5	immunoglobulin heavy variable 2/OR16-5 (non-functional)
A0A0B4J2B8	0.50409	IGHV1OR15-9	immunoglobulin heavy variable 1/OR15-9 (non-functional)
A0A0B4J2D5	0.66352	GATD3B	Putative glutamine amidotransferase-like class 1 domain-containing protein 3B, mitochondrial (Keio novel protein-I) (KNP-I) (Protein GT335) (Protein HES1)
A0A0B4J2D9	0.51892	IGKV1D-13	immunoglobulin kappa variable 1D-13
A0A0B4J2E0	0.48575	TRBV12-4	T cell receptor beta variable 12-4
A0A0B4J2E5	0.30293		Utp12 domain-containing protein
A0A0B4J2F2	0.51277	SIK1B	Putative serine/threonine-protein kinase SIK1B (EC 2.7.11.1) (Salt-inducible kinase 1B)
A0A0B4J2H0	0.54008	IGHV1-69D	immunoglobulin heavy variable 1-69D
A0A0C4DH24	0.52128	IGKV6-21	immunoglobulin kappa variable 6-21 (non-functional)
A0A0C4DH25	0.51988	IGKV3D-20	immunoglobulin kappa variable 3D-20
A0A0C4DH26	0.5243	IGKV6D-41	immunoglobulin kappa variable 6D-41 (non-functional)
A0A0C4DH27	0.46003	TRGV8	T cell receptor gamma variable 8
A0A0C4DH28	0.45548	TRGV4	T cell receptor gamma variable 4
A0A0C4DH29	0.50408	IGHV1-3	immunoglobulin heavy variable 1-3
A0A0C4DH30	0.48814	IGHV3-16	immunoglobulin heavy variable 3-16 (non-functional)
A0A0C4DH31	0.50422	IGHV1-18	immunoglobulin heavy variable 1-18
A0A0C4DH32	0.48722	IGHV3-20	immunoglobulin heavy variable 3-20
A0A0C4DH33	0.49599	IGHV1-24	immunoglobulin heavy variable 1-24
A0A0C4DH34	0.50082	IGHV4-28	immunoglobulin heavy variable 4-28
A0A0C4DH35	0.4919	IGHV3-35	immunoglobulin heavy variable 3-35 (non-functional)
A0A0C4DH36	0.49296	IGHV3-38	immunoglobulin heavy variable 3-38 (non-functional)
A0A0C4DH38	0.47942	IGHV5-51	immunoglobulin heavy variable 5-51
A0A0C4DH39	0.49902	IGHV1-58	immunoglobulin heavy variable 1-58
A0A0C4DH41	0.5004	IGHV4-61	immunoglobulin heavy variable 4-61
A0A0C4DH42	0.49513	IGHV3-66	immunoglobulin heavy variable 3-66
A0A0C4DH43	0.50372	IGHV2-70D	immunoglobulin heavy variable 2-70D
A0A0C4DH55	0.53057	IGKV3D-7	immunoglobulin kappa variable 3D-7
A0A0C4DH59	0.50304	TRBV5-4	T cell receptor beta variable 5-4
A0A0C4DH67	0.51989	IGKV1-8	immunoglobulin kappa variable 1-8
A0A0C4DH68	0.52031	IGKV2-24	immunoglobulin kappa variable 2-24
A0A0C4DH69	0.52099	IGKV1-9	immunoglobulin kappa variable 1-9
A0A0C4DH72	0.52072	IGKV1-6	immunoglobulin kappa variable 1-6
A0A0C4DH73	0.51825	IGKV1-12	immunoglobulin kappa variable 1-12
A0A0C4DH90	0.52846	IGKV3OR2-268	immunoglobulin kappa variable 3/OR2-268 (non-functional)
A0A0G2JKD1	0.56822	MUC21	mucin 21, cell surface associated
A0A0G2JLG4	0.31361	ASIC5	acid sensing ion channel subunit family member 5
A0A0G2JLM5	0.33665	KIR2DS5	killer cell immunoglobulin like receptor, two Ig domains and short cytoplasmic tail 5
A0A0G2JLQ3	0.40721	KIR2DS5	killer cell immunoglobulin like receptor, two Ig domains and short cytoplasmic tail 5
A0A0G2JMD5	0.443024	PRAMEF33	PRAME family member 33
A0A0G2JMH6	0.4013	HLA-DRA	major histocompatibility complex, class II, DR alpha
A0A0G2JMI3	0.498	IGHV1-69-2	immunoglobulin heavy variable 1-69-2
A0A0G2JMM0	0.33736		Killer cell immunoglobulin-like receptor
A0A0G2JMP0	0.69243	OR4M2B	olfactory receptor family 4 subfamily M member 2B
A0A0G2JMS6	0.40818		Ovostatin
A0A0G2JN01	0.33374	KIR3DP1	killer cell immunoglobulin like receptor, three Ig domains pseudogene 1
A0A0G2JN53	0.83332		IQ motif and SEC7 domain-containing protein 3
A0A0G2JN68	0.40236	KIR2DL5B	killer cell immunoglobulin like receptor, two Ig domains and long cytoplasmic tail 5B
A0A0G2JNF4	0.41146	KIR2DP1	killer cell immunoglobulin like receptor, two Ig domains pseudogene 1
A0A0G2JNG1	0.4095	KIR2DS5	killer cell immunoglobulin like receptor, two Ig domains and short cytoplasmic tail 5
A0A0G2JNH3	0.40678		Olfactory receptor
A0A0G2JNQ3	0.56686	HNRNPCL2	heterogeneous nuclear ribonucleoprotein C like 2
A0A0G2JP20	0.43	PRAMEF9	PRAME family member 9
A0A0G2JPB7	0.529662	BTNL2	butyrophilin like 2
A0A0G2JPC4	0.40067	KIR2DL5B	killer cell immunoglobulin like receptor, two Ig domains and long cytoplasmic tail 5B
A0A0G2JPF8	0.5673	HNRNPCL4	heterogeneous nuclear ribonucleoprotein C like 4
A0A0G2JQ47	0.41068	KIR2DS1	killer cell immunoglobulin like receptor, two Ig domains and short cytoplasmic tail 1
A0A0G2JRQ6	0.51568		Ig-like domain-containing protein
A0A0G2JS06	0.49227	IGLV5-39	immunoglobulin lambda variable 5-39
A0A0J9YVY3	0.48252	IGHV7-4-1	immunoglobulin heavy variable 7-4-1
A0A0J9YW62	0.5103		IGv domain-containing protein
A0A0J9YWL9	0.55395	TEX13C	TEX13 family member C
A0A0J9YWU9	0.49644		Ig-like domain-containing protein
A0A0J9YX35	0.48665	IGHV3-64D	immunoglobulin heavy variable 3-64D
A0A0J9YX57	0.537842	MAGEB6B	MAGE family member B6B
A0A0J9YX75	0.49209	TRBV6-9	T cell receptor beta variable 6-9
A0A0J9YX94	0.51749	PNMA6F	PNMA family member 6F
A0A0J9YXQ4	0.528032	PNMA6E	PNMA family member 6E
A0A0J9YXX1	0.47803	IGHV5-10-1	immunoglobulin heavy variable 5-10-1
A0A0J9YXY3	0.48754	TRBV6-2	T cell receptor beta variable 6-2
A0A0J9YY54	0.76828	TEX13D	TEX13 family member D
A0A0J9YY99	0.48945		Ig-like domain-containing protein
A0A0K0K1A3	0.48298	TRBV10-1	T cell receptor beta variable 10-1
A0A0K0K1A5	0.48911	TRBV6-5	T cell receptor beta variable 6-5
A0A0K0K1B3	0.4886	TRBV30	T cell receptor beta variable 30
A0A0K0K1C0	0.47738	TRBV11-1	T cell receptor beta variable 11-1
A0A0K0K1C4	0.48154	TRBV27	T cell receptor beta variable 27
A0A0K0K1D8	0.48927	TRBV6-1	T cell receptor beta variable 6-1
A0A0K0K1E9	0.48076	TRBV7-7	T cell receptor beta variable 7-7
A0A0K0K1G6	0.48879	TRBV10-3	T cell receptor beta variable 10-3
A0A0K0K1G8	0.48919	TRBV10-2	T cell receptor beta variable 10-2
A0A0K2S4Q6	0.59309	CD300H	CD300H molecule (gene/pseudogene)
A0A0M3HER8	0.674735	GOLGA6L10	golgin A6 family like 10
A0A0U1RQE8	0.40509	GLYATL1B	glycine-N-acyltransferase like 1B
A0A0U1RQI7	0.388715	KLF18	KLF transcription factor 18
A0A0U1RR11	0.3629	CENPVL1	centromere protein V like 1
A0A0U1RRI6	0.40197	CENPVL3	centromere protein V like 3
A0A0X1KG70	0.480345	OR4M2B	olfactory receptor family 4 subfamily M member 2B
A0A126GWB0	0.41228	OR2A2	olfactory receptor family 2 subfamily A member 2
A0A126GWI2	0.42888	OR2A25	olfactory receptor family 2 subfamily A member 25
A0A140G945	0.60865	CRYAA	crystallin alpha A
A0A140T8X8	0.572848	MUC21	mucin 21, cell surface associated
A0A140TA62	0.715915	LOC100653049	IF rod domain-containing protein
A0A191URJ7	0.40825	KIR2DL1	killer cell immunoglobulin like receptor, two Ig domains and long cytoplasmic tail 1
A0A1B0GTD5	0.32646	TEX49	Testis-expressed protein 49
A0A1B0GTE1	0.418952	CNTNAP3C	contactin associated protein family member 3C
A0A1B0GTH6	0.42916	CSNKA2IP	casein kinase 2 subunit alpha' interacting protein
A0A1B0GTH9	0.43753	LOC100505841	Zinc finger protein 474
A0A1B0GTI8	0.49673	TMEM272	transmembrane protein 272
A0A1B0GTK4	0.54768	FAM237A	family with sequence similarity 237 member A
A0A1B0GTL2	0.56025	C20orf204	chromosome 20 open reading frame 204
A0A1B0GTQ1	0.347196		Cytochrome P450 family 2 subfamily D member 6
A0A1B0GTS1	0.44345	HSFX4	heat shock transcription factor family, X-linked member 4
A0A1B0GTU1	0.33185	ZC3H11B	zinc finger CCCH-type containing 11B
A0A1B0GTW7	0.34788	CIROP	ciliated left-right organizer metallopeptidase
A0A1B0GTZ2	0.846987	CCDC196	coiled-coil domain containing 196
A0A1B0GUA7	0.70045	TEX51	testis expressed 51
A0A1B0GUJ8	0.43671	PNMA8C	PNMA family member 8C
A0A1B0GUL7	0.51358		Protein kinase domain-containing protein
A0A1B0GUS4	0.46173	UBE2L5	ubiquitin conjugating enzyme E2 L5
A0A1B0GUU1	0.337989	C17orf113	chromosome 17 open reading frame 113
A0A1B0GUV8	0.41154	LOC102723971	Lipocln_cytosolic_FA-bd_dom domain-containing protein
A0A1B0GUW6	0.8749	SPEM3	SPEM family member 3
A0A1B0GUX0	0.38839	ATP6V1FNB	Protein ATP6V1FNB (ATP6V1F neighbor gene protein)
A0A1B0GV03	0.703324	GOLGA6L7	golgin A6 family like 7
A0A1B0GV85	0.54238	REELD1	reeler domain containing 1
A0A1B0GVD1	0.49936	FAM237B	family with sequence similarity 237 member B
A0A1B0GVG4	0.76197	CCDC194	coiled-coil domain containing 194
A0A1B0GVH4	0.34526	PRSS51	serine protease 51
A0A1B0GVH7	0.39636	IQCM	IQ motif containing M
A0A1B0GVK7	0.56106	FAM240A	family with sequence similarity 240 member A
A0A1B0GVR7	0.6012	FAM240C	family with sequence similarity 240 member C
A0A1B0GVZ2	0.5727	FAM240B	family with sequence similarity 240 member B
A0A1B0GVZ9	0.76511	TMEM269	transmembrane protein 269
A0A1B0GW15	0.87206	LOC122394732	Transposase
A0A1B0GW35	0.47096	EXOC1L	exocyst complex component 1 like
A0A1B0GWH4	0.4424	HSFX3	heat shock transcription factor family, X-linked member 3
A0A1B0GWK0	0.479347	PVALEF	parvalbumin like EF-hand containing
A0A1B0GX31	0.48368	TRBV7-6	T cell receptor beta variable 7-6
A0A1B0GX49	0.48561	TRBV6-4	T cell receptor beta variable 6-4
A0A1B0GX51	0.4818	TRBV7-8	T cell receptor beta variable 7-8
A0A1B0GX56	0.54569	TRDV1	T cell receptor delta variable 1
A0A1B0GX68	0.48441	TRBV2	T cell receptor beta variable 2
A0A1B0GX78	0.48095	TRBV12-5	T cell receptor beta variable 12-5
A0A1B0GX95	0.51658	TRBV7-4	T cell receptor beta variable 7-4
A0A1B0GXF2	0.48838	TRBV7-2	T cell receptor beta variable 7-2
A0A1W2PN81	0.3308	CHRNA7	cholinergic receptor nicotinic alpha 7 subunit
A0A1W2PP81	0.59749	TAF11L5	TATA-box binding protein associated factor 11 like 5
A0A1W2PP97	0.3802	THSD8	thrombospondin type 1 domain containing 8
A0A1W2PPD8	0.30835	KDM4F	lysine demethylase 4F
A0A1W2PPE2	0.59363	TAF11L4	TATA-box binding protein associated factor 11 like 4
A0A1W2PPF3	0.537659	DUXB	double homeobox B
A0A1W2PPG7	0.52829	GNG14	G protein subunit gamma 14
A0A1W2PPH5	0.60267	TAF11L13	TATA-box binding protein associated factor 11 like 13
A0A1W2PPK0	0.48928	CPHXL2	cytoplasmic polyadenylated homeobox like 2
A0A1W2PPL8	0.59368	TAF11L14	TATA-box binding protein associated factor 11 like 14
A0A1W2PPM1	0.49389	CPHXL	cytoplasmic polyadenylated homeobox like
A0A1W2PPW3	0.60609	TAF11L12	TATA-box binding protein associated factor 11 like 12
A0A1W2PQ09	0.59733	TAF11L11	TATA-box binding protein associated factor 11 like 11
A0A1W2PQ27	0.46061	SSU72P7	RNA polymerase II subunit A C-terminal domain phosphatase SSU72 (CTD phosphatase SSU72) (EC 3.1.3.16)
A0A1W2PQ64	0.4603	SSU72P5	RNA polymerase II subunit A C-terminal domain phosphatase SSU72 (CTD phosphatase SSU72) (EC 3.1.3.16)
A0A1W2PQ72	0.643881	MSANTD7	Myb/SANT DNA binding domain containing 7
A0A1W2PQ73	0.53562	ERFL	ETS repressor factor like
A0A1W2PQC6	0.46046	SSU72P4	RNA polymerase II subunit A C-terminal domain phosphatase SSU72 (CTD phosphatase SSU72) (EC 3.1.3.16)
A0A1W2PQD8	0.46041	SSU72P2	RNA polymerase II subunit A C-terminal domain phosphatase SSU72 (CTD phosphatase SSU72) (EC 3.1.3.16)
A0A1W2PQF6	0.40913		KIR2DL2
A0A1W2PQJ5	0.46231	SSU72P3	RNA polymerase II subunit A C-terminal domain phosphatase SSU72 (CTD phosphatase SSU72) (EC 3.1.3.16)
A0A1W2PQL4	0.35036	ZNF722	zinc finger protein 722
A0A1W2PQM1	0.45143		Killer cell immunoglobulin-like receptor
A0A1W2PR19	0.42309	GSTT4	glutathione S-transferase theta 4
A0A1W2PR48	0.66733	TLE7	TLE family member 7
A0A1W2PR64	0.59883	TAF11L9	TATA-box binding protein associated factor 11 like 9
A0A1W2PR75	0.46126	SSU72P8	RNA polymerase II subunit A C-terminal domain phosphatase SSU72 (CTD phosphatase SSU72) (EC 3.1.3.16)
A0A1W2PR82	0.38729	PERCC1	proline and glutamate rich with coiled coil 1
A0A1W2PR95	0.39169	IGBP1P2	HCG1642624, isoform CRA_a (Immunoglobulin (CD79A)-binding protein 1 pseudogene 2)
A0A1W2PRG0	0.4218		glutathione transferase (EC 2.5.1.18)
A0A1W2PRN1	0.844291		GOLGA2L5 domain-containing protein
A0A1W2PRN6	0.59633	LINC02218	long intergenic non-protein coding RNA 2218
A0A1W2PRP0	0.54565	FOXL3	forkhead box L3
A0A1W2PRS3	0.4083		Killer cell immunoglobulin-like receptor KIR2DL1
A0A1W2PRV1	0.59943	TAF11L3	TATA-box binding protein associated factor 11 like 3
A0A1W2PS18	0.53269	PMIS2	PMIS2 transmembrane protein
A0A286YEU6	0.45615	OR1R1P	olfactory receptor family 1 subfamily R member 1 pseudogene
A0A286YF58	0.90251	TMEM271	transmembrane protein 271
A0A2R8Y422	0.392973	RPS27AP5	ribosomal protein S27a pseudogene 5
A0A2R8Y4L2	0.40572	HNRNPA1L3	heterogeneous nuclear ribonucleoprotein A1 like 3
A0A2R8Y4L6	0.38894	OR5D3P	olfactory receptor family 5 subfamily D member 3 pseudogene
A0A2R8Y4M4	0.66017	LOC122513141	RING-type domain-containing protein
A0A2R8Y4Y8	0.55983	OOSP4B	oocyte secreted protein family member 4B
A0A2R8Y5M8	0.60532	TOMT	transmembrane O-methyltransferase
A0A2R8Y619	0.63626	H2BK1	H2B.K variant histone 1
A0A2R8Y7D0	0.53247	TINCR	TINCR ubiquitin domain containing
A0A2R8YCY7	0.41181		KIR2DL2
A0A2R8YE69	0.7218		MIA SH3 domain ER export factor 2
A0A2R8YED5	0.3903	OR5BS1P	olfactory receptor family 5 subfamily BS member 1 pseudogene
A0A2R8YEG4	0.40156	OR2A1	olfactory receptor family 2 subfamily A member 1
A0A2R8YEH3	0.40556	LOC112268384	Olfactory receptor
A0A2R8YEV3	0.40217	OR2A42	olfactory receptor family 2 subfamily A member 42
A0A2R8YFL7	0.55123	OOSP4A	oocyte secreted protein family member 4A
A0A2R8YFM6	0.54443	OOSP3	oocyte secreted protein family member 3
A0A2R8YFR7	0.35582		DH domain-containing protein
A0A376A8Z9	0.40918	KIR2DS5	killer cell immunoglobulin like receptor, two Ig domains and short cytoplasmic tail 5
A0A3B3IRS2	0.38546	LOC647264	Keratin-associated protein 21-1-like
A0A3B3IRV3	0.79939	MCTS2	MCTS family member 2
A0A3B3IT33	0.407579	TRIM51G	tripartite motif-containing 51G
A0A3B3IT45	0.4119	OR51C1P	olfactory receptor family 51 subfamily C member 1 pseudogene
A0A3B3IT52	0.49857	MSANTD5	Myb/SANT DNA binding domain containing 5
A0A3B3IU63	0.59061	H2AL3	H2A.L variant histone 3
A0A494C071	0.416828	PWWP4	PWWP domain containing 4
A0A494C086	0.46426	SPDYE21	speedy/RINGO cell cycle regulator family member E21
A0A494C0I6	0.89667		Secreted protein
A0A494C0N9	0.76641	FAM246B	family with sequence similarity 246 member B
A0A494C0Y3	0.80773	FAM246A	family with sequence similarity 246 member A
A0A494C0Z2	0.46316	SPDYE13	speedy/RINGO cell cycle regulator family member E13
A0A494C103	0.56499	LOC112577516	CUB domain-containing protein
A0A494C191	0.46351	SPDYE9	speedy/RINGO cell cycle regulator family member E9
A0A494C1R9	0.35376	TSPY9	testis specific protein Y-linked 9
A0A499FJF3	0.35501		Rho-GAP domain-containing protein
A0A4W9AIG4	0.42131	OR2A14	olfactory receptor family 2 subfamily A member 14
A0A539	0.47125	TRBV4-2	T cell receptor beta variable 4-2
A0A576	0.47429	TRBV3-1	T cell receptor beta variable 3-1
A0A577	0.46783	TRBV4-1	T cell receptor beta variable 4-1
A0A578	0.49791	TRBV5-1	T cell receptor beta variable 5-1
A0A584	0.48137	TRBV11-2	T cell receptor beta variable 11-2
A0A589	0.4633	TRBV4-3	T cell receptor beta variable 4-3
A0A597	0.50184	TRBV5-5	T cell receptor beta variable 5-5
A0A599	0.49897	TRBV5-6	T cell receptor beta variable 5-6
A0A5A2	0.49956	TRBV5-8	T cell receptor beta variable 5-8
A0A5A6	0.47558	TRBV11-3	T cell receptor beta variable 11-3
A0A5B0	0.49269	TRBV14	T cell receptor beta variable 14
A0A5B6	0.47981	TRBV28	T cell receptor beta variable 28
A0A5B7	0.49338	TRBV29-1	T cell receptor beta variable 29-1
A0A5B9	0.52725	TRBC2	T cell receptor beta constant 2
A0A5F9Z9Y6	0.40969		KIR2DL2
A0A5F9ZH88	0.40563		KIR2DL1
A0A5F9ZHS7	0.77938	NFILZ	NFIL3 like basic leucine zipper
A0A5K1VDZ0	0.41005	KIR2DL1	killer cell immunoglobulin like receptor, two Ig domains and long cytoplasmic tail 1
A0A5S8K742	0.3429
A0A7I2V3D3	0.57198
A0A7I2V3R4	0.39628	LOC122319436	RING-type domain-containing protein
A0AUZ9	0.90552	KANSL1L	KAT8 regulatory NSL complex subunit 1 like
A0AV02	0.81387	SLC12A8	solute carrier family 12 member 8
A0AV96	0.523131	RBM47	RNA binding motif protein 47
A0AVF1	0.41021	TTC26	Intraflagellar transport protein 56 (Tetratricopeptide repeat protein 26) (TPR repeat protein 26)
A0AVI2	0.355686	FER1L5	fer-1 like family member 5
A0AVI4	0.37153	TMEM129	transmembrane protein 129, E3 ubiquitin ligase
A0AVK6	0.38597	E2F8	E2F transcription factor 8
A0AVT1	0.49513	UBA6	ubiquitin like modifier activating enzyme 6
A0FGR8	0.399628	ESYT2	extended synaptotagmin 2
A0FGR9	0.408564	ESYT3	extended synaptotagmin 3
A0JD32	0.50609	TRAV38-2DV8	T cell receptor alpha variable 38-2/delta variable 8
A0JD36	0.52757	TRDV2	T cell receptor delta variable 2
A0JD37	0.58178	TRDV3	T cell receptor delta variable 3
A0JLT2	0.3295	MED19	mediator complex subunit 19
A0JNW5	0.26084	BLTP3B	bridge-like lipid transfer protein family member 3B
A0JP26	0.57764	POTEB3	POTE ankyrin domain family member B3
A0M8Q6	0.59915	IGLC7	immunoglobulin lambda constant 7
A0MZ66	0.745829	SHTN1	shootin 1
A0PG75	0.37978	PLSCR5	phospholipid scramblase family member 5
A0PJE2	0.59486	DHRS12	dehydrogenase/reductase 12
A0PJK1	0.56876	SLC5A10	solute carrier family 5 member 10
A0PJW6	0.66851	TMEM223	transmembrane protein 223
A0PJX0	0.36024	CIB4	calcium and integrin binding family member 4
A0PJX2	0.39335	TLDC2	TBC/LysM-associated domain containing 2
A0PJX4	0.36454	SHISA3	shisa family member 3
A0PJX8	0.44738	TMEM82	transmembrane protein 82
A0PJY2	0.358443	FEZF1	FEZ family zinc finger 1
A0PJZ0	0.51978	ANKRD20A5P	ankyrin repeat domain 20 family member A5, pseudogene
A0PJZ3	0.52378	GXYLT2	glucoside xylosyltransferase 2
A0PK00	0.39736	TMEM120B	transmembrane protein 120B
A0PK05	0.6535	TMEM72	transmembrane protein 72
A0PK11	0.46497	CLRN2	clarin 2
A0ZSE6	0.47168	TMEM30CP	transmembrane protein 30C, pseudogene
A1A4S6	0.523243	ARHGAP10	Rho GTPase activating protein 10
A1A4V9	0.49159	CFAP119	cilia and flagella associated protein 119
A1A4Y4	0.61045	IRGM	immunity related GTPase M
A1A519	0.56753	FAM170A	family with sequence similarity 170 member A
A1A5B4	0.2716	ANO9	anoctamin 9
A1A5C7	0.61713	SLC22A23	solute carrier family 22 member 23
A1A5D9	0.595535	BICDL2	BICD family like cargo adaptor 2
A1IGU5	0.482173	ARHGEF37	Rho guanine nucleotide exchange factor 37
A1KZ92	0.383834	PXDNL	peroxidasin like
A1L020	0.604396	MEX3A	mex-3 RNA binding family member A
A1L0T0	0.8244	ILVBL	ilvB acetolactate synthase like
A1L157	0.43916	TSPAN11	tetraspanin 11
A1L162	0.61808	ERICH2	glutamate rich 2
A1L167	0.42577	UBE2QL1	ubiquitin conjugating enzyme E2 Q family like 1
A1L168	0.8807	C20orf202	chromosome 20 open reading frame 202
A1L188	0.50816	NDUFAF8	NADH:ubiquinone oxidoreductase complex assembly factor 8
A1L1A6	0.6294	IGSF23	immunoglobulin superfamily member 23
A1L390	0.33839	PLEKHG3	pleckstrin homology and RhoGEF domain containing G3
A1L3X0	0.45861	ELOVL7	ELOVL fatty acid elongase 7
A1L443	0.44006	NUTM2F	NUT family member 2F
A1L453	0.3372	PRSS38	serine protease 38
A1L4H1	0.42501	SSC5D	scavenger receptor cysteine rich family member with 5 domains
A1L4K1	0.433191	FSD2	fibronectin type III and SPRY domain containing 2
A1L4L8	0.44057	PLAC8L1	PLAC8 like 1
A1X283	0.541901	SH3PXD2B	SH3 and PX domains 2B
A1XBS5	0.48657	CIBAR1	CBY1 interacting BAR domain containing 1
A1YPR0	0.339377	ZBTB7C	zinc finger and BTB domain containing 7C
A1Z1Q3	0.45256	MACROD2	mono-ADP ribosylhydrolase 2
A2A288	0.50353	ZC3H12D	zinc finger CCCH-type containing 12D
A2A2Y4	0.367499	FRMD3	FERM domain containing 3
A2A2Z9	0.647683	ANKRD18B	ankyrin repeat domain 18B
A2A368	0.36478	MAGEB16	MAGE family member B16
A2A3K4	0.34422	PTPDC1	protein tyrosine phosphatase domain containing 1
A2A3L6	0.66433	TTC24	tetratricopeptide repeat domain 24
A2A3N6	0.507787	PIPSL	PIP5K1A and PSMD4 like (pseudogene)
A2CJ06	0.451863	DYTN	dystrotelin
A2IDD5	0.829696	CCDC78	coiled-coil domain containing 78
A2NJV5	0.51762	IGKV2-29	immunoglobulin kappa variable 2-29
A2PYH4	0.666525	HFM1	helicase for meiosis 1
A2RRD8	0.388285	ZNF320	zinc finger protein 320
A2RRH5	0.672352	WDR27	WD repeat domain 27
A2RRP1	0.467615	NBAS	NBAS subunit of NRZ tethering complex
A2RTX5	0.598692	TARS3	threonyl-tRNA synthetase 3
A2RTY3	0.47453	HEATR9	HEAT repeat containing 9
A2RU14	0.61622	TMEM218	transmembrane protein 218
A2RU30	0.4869	TESPA1	thymocyte expressed, positive selection associated 1
A2RU48	0.51951	SMCO3	single-pass membrane protein with coiled-coil domains 3
A2RU49	0.45737	HYKK	hydroxylysine kinase
A2RU54	0.54614	HMX2	H6 family homeobox 2
A2RU67	0.63005	FAM234B	family with sequence similarity 234 member B
A2RUB1	0.49637	MEIOC	meiosis specific with coiled-coil domain
A2RUB6	0.754235	CCDC66	coiled-coil domain containing 66
A2RUC4	0.3349	TYW5	tRNA-yW synthesizing protein 5
A2RUH7	0.535709	MYBPHL	myosin binding protein H like
A2RUR9	0.752749	CCDC144A	coiled-coil domain containing 144A
A2RUS2	0.433469	DENND3	DENN domain containing 3
A2RUU4	0.32975	CLPSL1	colipase like 1
A2VCK2	0.449679	DCDC2B	doublecortin domain containing 2B
A2VDF0	0.42258	FUOM	fucose mutarotase
A2VDJ0	0.496389	TMEM131L	transmembrane 131 like
A3KFT3	0.39272	OR2M5	olfactory receptor family 2 subfamily M member 5
A3KMH1	0.476034	VWA8	von Willebrand factor A domain containing 8
A3KN83	0.42722	SBNO1	strawberry notch homolog 1
A3QJZ6	0.42663	PRAMEF22	PRAME family member 22
A3QJZ7	0.43189	PRAMEF27	PRAME family member 27
A4D0S4	0.414904	LAMB4	laminin subunit beta 4
A4D0V7	0.458847	CPED1	cadherin like and PC-esterase domain containing 1
A4D126	0.50455	CRPPA	CDP-L-ribitol pyrophosphorylase A
A4D161	0.31528	FAM221A	family with sequence similarity 221 member A
A4D1B5	0.365111	GSAP	gamma-secretase activating protein
A4D1E1	0.70515	ZNF804B	zinc finger protein 804B
A4D1E9	0.540502	GTPBP10	GTP binding protein 10
A4D1F6	0.415085	LRRD1	leucine rich repeats and death domain containing 1
A4D1P6	0.656131	WDR91	WD repeat domain 91
A4D1S0	0.36448	KLRG2	killer cell lectin like receptor G2
A4D1S5	0.73263	RAB19	RAB19, member RAS oncogene family
A4D1T9	0.35044	PRSS37	serine protease 37
A4D1U4	0.38728	DENND11	DENN domain containing 11
A4D1Z8	0.59983	GRIFIN	galectin-related inter-fiber protein
A4D256	0.36445	CDC14C	cell division cycle 14C
A4D2B0	0.71719	MBLAC1	metallo-beta-lactamase domain containing 1
A4D2B8	0.36577	PMS2P1	PMS1 homolog 2, mismatch repair system component pseudogene 1
A4D2G3	0.42328	OR2A25	olfactory receptor family 2 subfamily A member 25
A4D2H0	0.749313	CTAGE15	CTAGE family member 15
A4D2P6	0.427838	GRID2IP	Grid2 interacting protein
A4FU01	0.3041	MTMR11	myotubularin related protein 11
A4FU28	0.732611	CTAGE9	CTAGE family member 9
A4FU49	0.725342	SH3D21	SH3 domain containing 21
A4FU69	0.281642	EFCAB5	EF-hand calcium binding domain 5
A4GXA9	0.508527	EME2	essential meiotic structure-specific endonuclease subunit 2
A4IF30	0.41568	SLC35F4	solute carrier family 35 member F4
A4QMS7	0.29608	C5orf49	Uncharacterized protein C5orf49
A4QPB2	0.56197	LRP5L	LDL receptor related protein 5 like (pseudogene)
A4QPH2	0.464874	PI4KAP2	phosphatidylinositol 4-kinase alpha pseudogene 2
A5A3E0	0.559391	POTEF	POTE ankyrin domain family member F
A5D6W6	0.41561	FITM1	fat storage inducing transmembrane protein 1
A5D8T8	0.357335	CLEC18A	C-type lectin domain family 18 member A
A5D8V6	0.4731	VPS37C	VPS37C subunit of ESCRT-I
A5D8V7	0.618787	ODAD3	outer dynein arm docking complex subunit 3
A5D8W1	0.35702	CFAP69	cilia and flagella associated protein 69
A5LHX3	0.90767	PSMB11	proteasome subunit beta 11
A5PKW4	0.399564	PSD	pleckstrin and Sec7 domain containing
A5PLK6	0.468245	RGSL1	regulator of G protein signaling like 1
A5PLL1	0.51637	ANKRD34B	ankyrin repeat domain 34B
A5PLL7	0.39987	PEDS1	plasmanylethanolamine desaturase 1
A5PLN9	0.527746	TRAPPC13	trafficking protein particle complex subunit 13
A5X5Y0	0.3433	HTR3E	5-hydroxytryptamine receptor 3E
A5YKK6	0.428781	CNOT1	CCR4-NOT transcription complex subunit 1
A5YM72	0.42414	CARNS1	carnosine synthase 1
A6BM72	0.298804	MEGF11	multiple EGF like domains 11
A6H8M9	0.573215	CDHR4	cadherin related family member 4
A6H8Y1	0.48411	BDP1	B double prime 1, subunit of RNA polymerase III transcription initiation factor IIIB
A6H8Z2	0.34169	FAM221B	family with sequence similarity 221 member B
A6NC42	0.51766	DPPA5	developmental pluripotency associated 5
A6NC51	0.48908	TMEM150B	transmembrane protein 150B
A6NC57	0.628215	ANKRD62	ankyrin repeat domain 62
A6NC78	0.778981	GOLGA8IP	golgin A8 family member I, pseudogene
A6NC86	0.34256	PINLYP	phospholipase A2 inhibitor and LY6/PLAUR domain containing
A6NC97	0.41221	FAM172BP	Putative protein FAM172B (FAM172B pseudogene)
A6NC98	0.530179	CCDC88B	coiled-coil domain containing 88B
A6NCC3	0.82925	GOLGA8O	golgin A8 family member O
A6NCE7	0.37229	MAP1LC3B2	microtubule associated protein 1 light chain 3 beta 2
A6NCF5	0.52213	KLHL33	kelch like family member 33
A6NCF6	0.3656	MAGEA13P	MAGE family member A13, pseudogene
A6NCI4	0.467616	VWA3A	von Willebrand factor A domain containing 3A
A6NCK2	0.388291	TRIM43B	tripartite motif containing 43B
A6NCL1	0.84079	GMNC	geminin coiled-coil domain containing
A6NCL2	0.32314	LRCOL1	leucine rich colipase like 1
A6NCL7	0.41916	ANKRD33B	ankyrin repeat domain 33B
A6NCM1	0.39072	IQCA1L	IQ motif containing with AAA domain 1 like
A6NCN2	0.77201	KRT87P	keratin 87, pseudogene
A6NCN8	0.55779	TEX52	testis expressed 52
A6NCQ9	0.4687	RNF222	ring finger protein 222
A6NCS4	0.54381	NKX2-6	NK2 homeobox 6
A6NCS6	0.5918	C2orf72	chromosome 2 open reading frame 72
A6NCV1	0.39319	OR6C74	olfactory receptor family 6 subfamily C member 74
A6NCW0	0.35534	USP17L3	ubiquitin specific peptidase 17 like family member 3
A6NCW7	0.35434	USP17L4	ubiquitin specific peptidase 17 like family member 4
A6ND01	0.36063	IZUMO1R	IZUMO1 receptor, JUNO
A6ND36	0.436426	FAM83G	family with sequence similarity 83 member G
A6ND48	0.37753	OR14I1	olfactory receptor family 14 subfamily I member 1
A6ND91	0.78346	ASPDH	aspartate dehydrogenase domain containing
A6NDA9	0.456653	LRIT2	leucine rich repeat, Ig-like and transmembrane domains 2
A6NDB9	0.7371	PALM3	paralemmin 3
A6NDE4	0.58436	RBMY1B	RNA binding motif protein Y-linked family 1 member B
A6NDG6	0.4642	PGP	phosphoglycolate phosphatase
A6NDH6	0.38802	OR5H15	olfactory receptor family 5 subfamily H member 15
A6NDI0	0.33445	TRIM49B	tripartite motif containing 49B
A6NDK9	0.722384	GOLGA6C	golgin A6 family member C
A6NDL7	0.76593	METTL21EP	methyltransferase like 21E, pseudogene
A6NDL8	0.39635	OR6C68	olfactory receptor family 6 subfamily C member 68
A6NDN3	0.735207	GOLGA6B	golgin A6 family member B
A6NDN8	0.50731		Putative ubiquitin-like protein FUBI-like protein ENSP00000310146
A6NDP7	0.41674	MYADML2	myeloid associated differentiation marker like 2
A6NDR6	0.54873	MEIS3P1	Meis homeobox 3 pseudogene 1
A6NDS4	0.36127	TBC1D3B	TBC1 domain family member 3B
A6NDU8	0.43316	RIMOC1	RAB7A interacting MON1-CCZ1 complex subunit 1
A6NDV4	0.430351	TMEM8B	transmembrane protein 8B
A6NDX5	0.397382	ZNF840P	zinc finger protein 840, pseudogene
A6NDY0	0.55875	PABPN1L	PABPN1 like, cytoplasmic
A6NE01	0.624486	FAM186A	family with sequence similarity 186 member A
A6NE02	0.31693	BTBD17	BTB domain containing 17
A6NE52	0.543819	WDR97	WD repeat domain 97
A6NEC2	0.36627	NPEPPSL1	Puromycin-sensitive aminopeptidase-like protein (EC 3.4.11.-)
A6NED2	0.52803	RCCD1	RCC1 domain containing 1
A6NEE1	0.500687	PLEKHD1	pleckstrin homology and coiled-coil domain containing D1
A6NEF3	0.750155	GOLGA6L4	golgin A6 family like 4
A6NEH6	0.87449	TMEM247	transmembrane protein 247
A6NEK1	0.39787	ARRDC5	arrestin domain containing 5
A6NEL2	0.535764	SOWAHB	sosondowah ankyrin repeat domain family member B
A6NEM1	0.892984	GOLGA6L9	golgin A6 family like 9
A6NEN9	0.36651	CXorf65	chromosome X open reading frame 65
A6NEQ0	0.5742	RBMY1E	RNA binding motif protein Y-linked family 1 member E
A6NER0	0.41584	TBC1D3F	TBC1 domain family member 3F
A6NES4	0.456559	MROH2A	maestro heat like repeat family member 2A
A6NET4	0.41291	OR5K3	olfactory receptor family 5 subfamily K member 3
A6NEV1	0.39521	PRR23A	proline rich 23A
A6NEY3	0.815428	GOLGA6L3	Putative golgin subfamily A member 6-like protein 3
A6NEY8	0.37488	PRORSD1P	prolyl-tRNA synthetase associated domain containing 1, pseudogene
A6NF34	0.49953	ANTXRL	ANTXR like
A6NF36	0.68046	CCDC182	coiled-coil domain containing 182
A6NF89	0.40602	OR6C6	olfactory receptor family 6 subfamily C member 6
A6NFA1	0.45037	TRABD2B	TraB domain containing 2B
A6NFC5	0.64278	TMEM235	transmembrane protein 235
A6NFC9	0.54945	OR2W5P	olfactory receptor family 2 subfamily W member 5 pseudogene
A6NFD8	0.553334	HELT	helt bHLH transcription factor
A6NFE2	0.852457	SMCO2	single-pass membrane protein with coiled-coil domains 2
A6NFE3	0.482685	EFCAB10	EF-hand calcium binding domain 10
A6NFF2	0.56215	NAP1L6P	nucleosome assembly protein 1 like 6, pseudogene
A6NFH5	0.47912	FABP12	fatty acid binding protein 12
A6NFI3	0.391505	ZNF316	zinc finger protein 316
A6NFK2	0.40919	GRXCR2	glutaredoxin and cysteine rich domain containing 2
A6NFN3	0.60805	RBFOX3	RNA binding fox-1 homolog 3
A6NFN9	0.392849	ANKUB1	ankyrin repeat and ubiquitin domain containing 1
A6NFQ2	0.27803	TCAF2	TRPM8 channel associated factor 2
A6NFQ7	0.51893	DPRX	divergent-paired related homeobox
A6NFT4	0.41731	CFAP73	cilia and flagella associated protein 73
A6NFU0	0.35024	FAM187A	family with sequence similarity 187 member A
A6NFU8	0.50984	PGPEP1L	pyroglutamyl-peptidase I like
A6NFX1	0.65269	MFSD2B	MFSD2 lysolipid transporter B, sphingolipid
A6NFY4	0.37866	NEMP2	nuclear envelope integral membrane protein 2
A6NFY7	0.61918	SDHAF1	succinate dehydrogenase complex assembly factor 1
A6NG13	0.636608	MGAT4D	MGAT4 family member D
A6NGA9	0.57844	TMEM202	transmembrane protein 202
A6NGB0	0.719826	TMEM191C	transmembrane protein 191C
A6NGB7	0.56581	TMEM221	transmembrane protein 221
A6NGC4	0.52081	TLCD2	TLC domain containing 2
A6NGD5	0.33943	ZSCAN5C	zinc finger and SCAN domain containing 5C
A6NGE4	0.60518	DCAF8L1	DDB1 and CUL4 associated factor 8 like 1
A6NGE7	0.36327	URAD	ureidoimidazoline (2-oxo-4-hydroxy-4-carboxy-5-) decarboxylase
A6NGG8	0.753122	PCARE	photoreceptor cilium actin regulator
A6NGH7	0.67963	CCDC160	coiled-coil domain containing 160
A6NGH8	0.40075	ANKRD61	ankyrin repeat domain 61
A6NGJ6	0.394547	TRIM64	tripartite motif containing 64
A6NGN4	0.4227	PRAMEF25	PRAME family member 25
A6NGN9	0.42185	IGLON5	IgLON family member 5
A6NGQ2	0.50593	OOEP	oocyte expressed protein
A6NGR9	0.40136	MROH6	maestro heat like repeat family member 6
A6NGS2	0.66375	ERICH4	glutamate rich 4
A6NGU5	0.31251	GGT3P	gamma-glutamyltransferase 3 pseudogene
A6NGW2	0.405838	STRCP1	stereocilin pseudogene 1
A6NGY1	0.59596	FRG2C	FSHD region gene 2 family member C
A6NGY3	0.92509	C5orf52	chromosome 5 open reading frame 52
A6NGY5	0.39509	OR51F1	olfactory receptor family 51 subfamily F member 1
A6NH00	0.40625	OR2T8	olfactory receptor family 2 subfamily T member 8
A6NH11	0.44703	GLTPD2	glycolipid transfer protein domain containing 2
A6NH21	0.36126	SERINC4	serine incorporator 4
A6NH52	0.49859	TVP23A	trans-golgi network vesicle protein 23 homolog A
A6NH57	0.77442	ARL5C	ADP ribosylation factor like GTPase 5C
A6NHA9	0.39781	OR4C46	olfactory receptor family 4 subfamily C member 46
A6NHC0	0.325456	CAPN8	calpain 8
A6NHG4	0.48194	DDTL	D-dopachrome tautomerase like
A6NHG9	0.39688	OR5H14	olfactory receptor family 5 subfamily H member 14
A6NHJ4	0.3372	ZNF860	zinc finger protein 860
A6NHL2	0.62459	TUBAL3	tubulin alpha like 3
A6NHM9	0.32501	MOXD2P	monooxygenase DBH like 2, pseudogene
A6NHN0	0.5369	OTOL1	otolin 1
A6NHP3	0.46065	SPDYE2B	speedy/RINGO cell cycle regulator family member E2B
A6NHQ2	0.9466	FBLL1	fibrillarin like 1
A6NHR9	0.556983	SMCHD1	structural maintenance of chromosomes flexible hinge domain containing 1
A6NHS7	0.40413	MANSC4	MANSC domain containing 4
A6NHT5	0.54615	HMX3	H6 family homeobox 3
A6NHX0	0.32685	CASTOR2	cytosolic arginine sensor for mTORC1 subunit 2
A6NHY2	0.45377	ANKDD1B	ankyrin repeat and death domain containing 1B
A6NHZ5	0.42041	LRRC14B	leucine rich repeat containing 14B
A6NI03	0.397163	TRIM64B	tripartite motif containing 64B
A6NI15	0.55575	MSGN1	mesogenin 1
A6NI28	0.444394	ARHGAP42	Rho GTPase activating protein 42
A6NI47	0.47164	POTEM	POTE ankyrin domain family member M
A6NI56	0.672909	CCDC154	coiled-coil domain containing 154
A6NI61	0.43946	MYMK	myomaker, myoblast fusion factor
A6NI72	0.386065	NCF1B	neutrophil cytosolic factor 1B (pseudogene)
A6NI73	0.40749	LILRA5	leukocyte immunoglobulin like receptor A5
A6NI79	0.752536	CCDC69	coiled-coil domain containing 69
A6NI86	0.807275	GOLGA6L10	golgin A6 family like 10
A6NI87	0.85182	CBY3	chibby family member 3
A6NIE6	0.41986	RRN3P2	RRN3 pseudogene 2
A6NIE9	0.34588	PRSS29P	serine protease 29, pseudogene
A6NIH7	0.4777	UNC119B	unc-119 lipid binding chaperone B
A6NIJ9	0.40629	OR6C70	olfactory receptor family 6 subfamily C member 70
A6NIK2	0.47508	LRRC10B	leucine rich repeat containing 10B
A6NIM6	0.72884	SLC15A5	solute carrier family 15 member 5
A6NIN4	0.36682	RNF227	ring finger protein 227
A6NIR3	0.445798	AGAP5	ArfGAP with GTPase domain, ankyrin repeat and PH domain 5
A6NIV6	0.46916	LRRIQ4	leucine rich repeats and IQ motif containing 4
A6NIX2	0.434771	WTIP	WT1 interacting protein
A6NIY4	0.46276	SPDYE5	speedy/RINGO cell cycle regulator family member E5
A6NIZ1	0.73048		Ras-related protein Rap-1b-like protein
A6NJ46	0.54101	NKX6-3	NK6 homeobox 3
A6NJ64	0.89865	NPIPB2	nuclear pore complex interacting protein family member B2
A6NJ78	0.51909	METTL15	methyltransferase 15, mitochondrial 12S rRNA N4-cytidine
A6NJ88	0.383512	SAGE2P	sarcoma antigen 2, pseudogene
A6NJG2	0.52187	SOWAHD	sosondowah ankyrin repeat domain family member D
A6NJG6	0.55362	ARGFX	arginine-fifty homeobox
A6NJI9	0.42107	LRRC72	leucine rich repeat containing 72
A6NJJ6	0.43556	C19orf67	chromosome 19 open reading frame 67
A6NJL1	0.32985	ZSCAN5B	zinc finger and SCAN domain containing 5B
A6NJR5	0.45058		Putative speedy protein-like protein 3
A6NJT0	0.53433	UNCX	UNC homeobox
A6NJV1	0.4337	FAM166C	Protein FAM166C (Family with sequence similarity 166 member C)
A6NJW4	0.40001	LRRC3C	leucine rich repeat containing 3C
A6NJW9	0.53768	CD8B2	CD8B family member 2
A6NJY1	0.55275	SLC9B1P1	solute carrier family 9 member B1 pseudogene 1
A6NJY4	0.72753	TMEM238L	transmembrane protein 238 like
A6NJZ3	0.37612	OR6C65	olfactory receptor family 6 subfamily C member 65
A6NJZ7	0.632885	RIMBP3C	RIMS binding protein 3C
A6NK02	0.522675	TRIM75	tripartite motif containing 75
A6NK06	0.41376	ACOD1	aconitate decarboxylase 1
A6NK44	0.39363	GLOD5	glyoxalase domain containing 5
A6NK53	0.327514	ZNF233	zinc finger protein 233
A6NK58	0.60708	LIPT2	lipoyl(octanoyl) transferase 2
A6NK59	0.42445	ASB14	ankyrin repeat and SOCS box containing 14
A6NK75	0.361651	ZNF98	zinc finger protein 98
A6NK89	0.672598	RASSF10	Ras association domain family member 10
A6NK97	0.6486	SLC22A20P	solute carrier family 22 member 20, pseudogene
A6NKB5	0.396543	PCNX2	pecanex 2
A6NKC9	0.38163	SH2D7	SH2 domain containing 7
A6NKD2	0.35295	TSPY2	testis specific protein Y-linked 2
A6NKD9	0.77302	CCDC85C	coiled-coil domain containing 85C
A6NKF1	0.43137	SAC3D1	SAC3 domain containing 1
A6NKF2	0.43687	ARID3C	AT-rich interaction domain 3C
A6NKG5	0.399466	RTL1	retrotransposon Gag like 1
A6NKH3	0.87956	RPL37AP8	ribosomal protein L37a pseudogene 8
A6NKK0	0.39292	OR5H1	olfactory receptor family 5 subfamily H member 1
A6NKL6	0.66835	TMEM200C	transmembrane protein 200C
A6NKP2	0.77844	SDR42E2	short chain dehydrogenase/reductase family 42E, member 2
A6NKQ9	0.34465	CGB1	chorionic gonadotropin subunit beta 1
A6NKT7	0.416733	RGPD3	RANBP2 like and GRIP domain containing 3
A6NKU9	0.44896	SPDYE3	speedy/RINGO cell cycle regulator family member E3
A6NKW6	0.36019	SHISAL2B	shisa like 2B
A6NKX4	0.68435	SLC22A31	solute carrier family 22 member 31
A6NL08	0.38952	OR6C75	olfactory receptor family 6 subfamily C member 75
A6NL26	0.38146	OR5B21	olfactory receptor family 5 subfamily B member 21
A6NL88	0.34863	SHISA7	shisa family member 7
A6NL99	0.53263	AQP7P3	aquaporin 7 pseudogene 3
A6NLC8	0.59986	TAF11L2	TATA-box binding protein associated factor 11 like 2
A6NLF2	0.503271
A6NLI5	0.40729	TRIM64C	tripartite motif containing 64C
A6NLJ0	0.55178	C2CD4B	C2 calcium dependent domain containing 4B
A6NLP5	0.53223	TTC36	tetratricopeptide repeat domain 36
A6NLU0	0.46228	RFPL4A	ret finger protein like 4A
A6NLU5	0.68317	VSTM2B	V-set and transmembrane domain containing 2B
A6NLW8	0.539435	DUXA	double homeobox A
A6NLX3	0.45768	SPDYE4	speedy/RINGO cell cycle regulator family member E4
A6NM03	0.41049	OR2AG2	olfactory receptor family 2 subfamily AG member 2
A6NM10	0.50787	AQP12B	aquaporin 12B
A6NM11	0.482623	LRRC37A2	leucine rich repeat containing 37 member A2
A6NM28	0.365571	ZFP92	ZFP92 zinc finger protein
A6NM36	0.46752	LRRC30	leucine rich repeat containing 30
A6NM43	0.81765	CCT8L1P	chaperonin containing TCP1 subunit 8 like 1, pseudogene
A6NM45	0.51939	CLDN24	claudin 24
A6NM62	0.50386	LRRC53	leucine rich repeat containing 53
A6NM76	0.4065	OR6C76	olfactory receptor family 6 subfamily C member 76
A6NMB1	0.45598	SIGLEC16	sialic acid binding Ig like lectin 16
A6NMB9	0.83263	FIGNL2	fidgetin like 2
A6NMD0	0.59029	IFITM10	interferon induced transmembrane protein 10
A6NMD2	0.785331	GOLGA8J	golgin A8 family member J
A6NMK7	0.307306	CPSF4L	cleavage and polyadenylation specific factor 4 like
A6NMK8	0.6817	INSYN2B	inhibitory synaptic factor family member 2B
A6NML5	0.64881	TMEM212	transmembrane protein 212
A6NMN3	0.40738	FAM170B	family with sequence similarity 170 member B
A6NMS3	0.37675	OR5K4	olfactory receptor family 5 subfamily K member 4
A6NMS7	0.485493	LRRC37A	leucine rich repeat containing 37A
A6NMT0	0.54496	DBX1	developing brain homeobox 1
A6NMU1	0.39681	OR52A4P	olfactory receptor family 52 subfamily A member 4 pseudogene
A6NMX2	0.4	EIF4E1B	eukaryotic translation initiation factor 4E family member 1B
A6NMY6	0.39551	ANXA2P2	annexin A2 pseudogene 2
A6NMZ2	0.45124	SNTN	sentan, cilia apical structure protein
A6NMZ5	0.3875	OR4C45	olfactory receptor family 4 subfamily C member 45 (gene/pseudogene)
A6NMZ7	0.485719	COL6A6	collagen type VI alpha 6 chain
A6NN14	0.417579	ZNF729	zinc finger protein 729
A6NN73	0.777136	GOLGA8CP	golgin A8 family member C, pseudogene
A6NN90	0.63077	C2orf81	chromosome 2 open reading frame 81
A6NN92	0.50238	GJE1	gap junction protein epsilon 1
A6NNA2	0.76039	SRRM3	serine/arginine repetitive matrix 3
A6NNA5	0.52784	DRGX	dorsal root ganglia homeobox
A6NNB3	0.7872	IFITM5	interferon induced transmembrane protein 5
A6NND4	0.3991	OR2AT4	olfactory receptor family 2 subfamily AT member 4
A6NNE9	0.61743	MARCHF11	membrane associated ring-CH-type finger 11
A6NNF4	0.391062	ZNF726	zinc finger protein 726
A6NNL0	0.429636	NUTM2B	NUT family member 2B
A6NNL5	0.34911	C15orf61	chromosome 15 open reading frame 61
A6NNM3	0.611655	RIMBP3B	RIMS binding protein 3B
A6NNM8	0.531	TTLL13	tubulin tyrosine ligase like 13
A6NNN8	0.75331	SLC38A8	solute carrier family 38 member 8
A6NNP5	0.72743	CCDC169	coiled-coil domain containing 169
A6NNS2	0.59471	DHRS7C	dehydrogenase/reductase 7C
A6NNT2	0.824763	C16orf96	chromosome 16 open reading frame 96
A6NNV3	0.45343	SPDYE16	speedy/RINGO cell cycle regulator family member E16
A6NNW6	0.73432	ENO4	enolase 4
A6NNX1	0.45274	RIIAD1	regulatory subunit of type II PKA R-subunit domain containing 1
A6NNY8	0.34993	USP27X	ubiquitin specific peptidase 27 X-linked
A6NNZ2	0.63546	TUBB8B	tubulin beta 8B
A6NP11	0.380883	ZNF716	zinc finger protein 716
A6NP61	0.40507	ZAR1L	zygote arrest 1 like
A6PVC2	0.50012	TTLL8	tubulin tyrosine ligase like 8
A6PVI3	0.41688	NCBP2L	nuclear cap binding protein subunit 2 like
A6PVS8	0.488855	LRRIQ3	leucine rich repeats and IQ motif containing 3
A6QL63	0.380612	ABTB3	ankyrin repeat and BTB domain containing 3
A6QL64	0.636245	ANKRD36	ankyrin repeat domain 36
A6XGL0	0.4934	YJEFN3	YjeF N-terminal domain containing 3
A7E2F4	0.790166	GOLGA8A	golgin A8 family member A
A7E2S9	0.52757	ANKRD30BL	ankyrin repeat domain 30B like
A7E2U8	0.39658	C4orf47	UPF0602 protein C4orf47
A7E2V4	0.356051	ZSWIM8	zinc finger SWIM-type containing 8
A7E2Y1	0.460112	MYH7B	myosin heavy chain 7B
A7KAX9	0.445682	ARHGAP32	Rho GTPase activating protein 32
A7MBM2	0.45071	DISP2	dispatched RND transporter family member 2
A7MCY6	0.807642	TBKBP1	TBK1 binding protein 1
A7XYQ1	0.505231	SOBP	sine oculis binding protein homolog
A8K0R7	0.41724	ZNF839	zinc finger protein 839
A8K0S8	0.475591	MEIS3P2	Meis homeobox 3 pseudogene 2
A8K0Z3	0.48579	WASHC1	WASH complex subunit 1
A8K2U0	0.489315	A2ML1	alpha-2-macroglobulin like 1
A8K4G0	0.56913	CD300LB	CD300 molecule like family member b
A8K7I4	0.65256	CLCA1	chloride channel accessory 1
A8K855	0.350413	EFCAB7	EF-hand calcium binding domain 7
A8K8P3	0.548483	SFI1	SFI1 centrin binding protein
A8K8V0	0.29111	ZNF785	zinc finger protein 785
A8K979	0.53508	ERI2	ERI1 exoribonuclease family member 2
A8MPP1	0.75121	DDX11L8	DEAD/H-box helicase 11 like 8 (pseudogene)
A8MPS7	0.54893	YDJC	YdjC chitooligosaccharide deacetylase homolog
A8MPX8	0.41555	PP2D1	protein phosphatase 2C like domain containing 1
A8MPY1	0.3503	GABRR3	gamma-aminobutyric acid type A receptor subunit rho3
A8MQ14	0.37269	ZNF850	zinc finger protein 850
A8MQ27	0.551755	NEURL1B	neuralized E3 ubiquitin protein ligase 1B
A8MQT2	0.59505	GOLGA8B	golgin A8 family member B
A8MRT5	0.48428	NPIPB5	nuclear pore complex interacting protein family member B5
A8MSI8	0.52889	LYRM9	LYR motif containing 9
A8MT19	0.417928	RHPN2P1	rhophilin Rho GTPase binding protein 2 pseudogene 1
A8MT33	0.66085	SYCE1L	synaptonemal complex central element protein 1 like
A8MT65	0.393494	ZNF891	zinc finger protein 891
A8MT69	0.67278	CENPX	centromere protein X
A8MTA8	0.36949	FAM166B	Protein FAM166B
A8MTB9	0.51475	CEACAM18	CEA cell adhesion molecule 18
A8MTI9	0.35257	PRSS47P	serine protease 47, pseudogene
A8MTJ3	0.48287	GNAT3	G protein subunit alpha transducin 3
A8MTJ6	0.55825	FOXI3	forkhead box I3
A8MTL0	0.82261	IQCF5	IQ motif containing F5
A8MTL3	0.52806	RNF212B	ring finger protein 212B
A8MTL9	0.41909	HMSD	histocompatibility minor serpin domain containing
A8MTQ0	0.53246	NOTO	notochord homeobox
A8MTT3	0.56201	CEBPZOS	CEBPZ opposite strand
A8MTY0	0.341625	ZNF724	zinc finger protein 724
A8MTZ0	0.50832	BBIP1	BBSome interacting protein 1
A8MU46	0.46859	SMTNL1	smoothelin like 1
A8MUH7	0.367603	PDZK1P1	PDZ domain containing 1 pseudogene 1
A8MUK1	0.35671	USP17L5	ubiquitin specific peptidase 17 like family member 5
A8MUM7	0.61382	LGALS16	galectin 16
A8MUP2	0.67304	CSKMT	citrate synthase lysine methyltransferase
A8MUP6	0.47247	GSG1L2	GSG1 like 2
A8MUU1	0.44775	FABP5P3	fatty acid binding protein 5 pseudogene 3
A8MUV8	0.373465	ZNF727	zinc finger protein 727
A8MUX0	0.42155	KRTAP16-1	keratin associated protein 16-1
A8MUZ8	0.390911	ZNF705G	zinc finger protein 705G
A8MV23	0.32634	SERPINE3	serpin family E member 3
A8MV24	0.38936	C17orf98	Uncharacterized protein C17orf98
A8MV57	0.34795	MPTX1	mucosal pentraxin 1 (pseudogene)
A8MV65	0.33838	VGLL3	vestigial like family member 3
A8MV72	0.78003		Putative UPF0607 protein ENSP00000382826
A8MVJ9	0.34937		Putative histone PARylation factor 1-like
A8MVS1	0.389897
A8MVS5	0.58315	HIDE1	Protein HIDE1
A8MVU1	0.377759	NCF1C	neutrophil cytosolic factor 1C (pseudogene)
A8MVW0	0.32542	FAM171A2	family with sequence similarity 171 member A2
A8MVW5	0.36918	HEPACAM2	HEPACAM family member 2
A8MVX0	0.593506	ARHGEF33	Rho guanine nucleotide exchange factor 33
A8MVZ5	0.54708	BTNL10P	butyrophilin like 10, pseudogene
A8MW92	0.624758	PHF20L1	PHD finger protein 20 like 1
A8MW95	0.645205	BECN2	beclin 2
A8MW99	0.504226	MEI4	meiotic double-stranded break formation protein 4
A8MWA4	0.389719	ZNF705EP	zinc finger protein 705E, pseudogene
A8MWD9	0.72798	SNRPGP15	small nuclear ribonucleoprotein polypeptide G pseudogene 15
A8MWE9	0.46776	EFCAB8	EF-hand calcium binding domain 8
A8MWK0	0.32273	FADS2B	fatty acid desaturase 2B (pseudogene)
A8MWL6	0.54139		Putative synaptogyrin-2 like protein
A8MWX3	0.70935	WASH4P	WASP family homolog 4, pseudogene
A8MWY0	0.41815	ELAPOR2	endosome-lysosome associated apoptosis and autophagy regulator family member 2
A8MX76	0.327599	CAPN14	calpain 14
A8MXD5	0.40006	GRXCR1	glutaredoxin and cysteine rich domain containing 1
A8MXE2	0.486	B3GALT9	beta-1,3-galactosyltransferase 9
A8MXK1	0.694936	VSTM5	V-set and transmembrane domain containing 5
A8MXQ7	0.503752	IQANK1	IQ motif and ankyrin repeat containing 1
A8MXT2	0.37282	MAGEB17	MAGE family member B17
A8MXV4	0.3553	NUDT19	nudix hydrolase 19
A8MXV6	0.89517	CDRT15L2	CMT1A duplicated region transcript 15 like 2
A8MXY4	0.39215	ZNF99	zinc finger protein 99
A8MY62	0.38227	LACTBL1	lactamase beta like 1
A8MYB1	0.785791	TMCO5B	transmembrane and coiled-coil domains 5B (pseudogene)
A8MYJ7	0.38992	TTC34	tetratricopeptide repeat domain 34
A8MYU2	0.417886	KCNU1	potassium calcium-activated channel subfamily U member 1
A8MYV0	0.437039	DCDC2C	doublecortin domain containing 2C
A8MYZ0	0.34892	MINDY4B	MINDY family member 4B
A8MYZ5	0.78804	IQCF6	IQ motif containing F6
A8MYZ6	0.56501	FOXO6	forkhead box O6
A8MZ26	0.37513	EFCAB9	EF-hand calcium binding domain 9
A8MZ36	0.665212	EVPLL	envoplakin like
A8MZ59	0.55558	LEUTX	leucine twenty homeobox
A8MZA4	0.694697	GOLGA6L6	golgin A6 family like 6
A8MZH6	0.55072	OOSP1	oocyte secreted protein 1
A8TX70	0.595794	COL6A5	collagen type VI alpha 5 chain
A9QM74	0.5059	KPNA7	karyopherin subunit alpha 7
A9UHW6	0.54291	MIF4GD	MIF4G domain containing
A9YTQ3	0.35725	AHRR	aryl hydrocarbon receptor repressor
A9Z1Z3	0.313638	FER1L4	fer-1 like family member 4 (pseudogene)
B0FP48	0.42697	UPK3BL1	uroplakin 3B like 1
B0I1T2	0.360749	MYO1G	myosin IG
B0YJ81	0.49162	HACD1	3-hydroxyacyl-CoA dehydratase 1
B1AJZ9	0.642611	FHAD1	forkhead associated phosphopeptide binding domain 1
B1AK53	0.43413	ESPN	espin
B1AKI9	0.36649	ISM1	isthmin 1
B1AL46	0.43812	NUTM2E	NUT family member 2E
B1AL88	0.38471	NALF1	NALCN channel auxiliary factor 1
B1ANS9	0.631546	WDR64	WD repeat domain 64
B1APH4	0.484509	ZNF487	zinc finger protein 487
B2RC85	0.334207	RSPH10B2	radial spoke head 10 homolog B2
B2RD01	0.58173	CENPBD1P	CENPB DNA-binding domain containing 1, pseudogene
B2RN74	0.46247	OR11H12	olfactory receptor family 11 subfamily H member 12
B2RNN3	0.52247	C1QTNF9B	C1q and TNF related 9B
B2RPK0	0.463189	HMGB1P1	high mobility group box 1 pseudogene 1
B2RTY4	0.394701	MYO9A	myosin IXA
B2RU33	0.536946	POTEC	POTE ankyrin domain family member C
B2RUY7	0.319917	VWC2L	von Willebrand factor C domain containing 2 like
B2RV13	0.55699	CFAP97D1	CFAP97 domain containing 1
B2RXF0	0.36644	TMEM229A	transmembrane protein 229A
B2RXF5	0.32969	ZBTB42	zinc finger and BTB domain containing 42
B2RXH2	0.31193	KDM4E	lysine demethylase 4E
B2RXH4	0.36852	BTBD18	BTB domain containing 18
B2RXH8	0.56813	HNRNPCL2	heterogeneous nuclear ribonucleoprotein C like 2
B3GLJ2	0.44701	PATE3	prostate and testis expressed 3
B3KU38	0.514585	IQCJ-SCHIP1	IQCJ-SCHIP1 readthrough
B3SHH9	0.5689	TMEM114	transmembrane protein 114
B4DH59	0.85675	NBPF26	NBPF member 26
B4DS77	0.34451	SHISA9	shisa family member 9
B4DU55	0.344323	ZNF879	zinc finger protein 879
B4DX44	0.369476	ZNF736	zinc finger protein 736
B4DXR9	0.361308	ZNF732	zinc finger protein 732
B4DZS4	0.35365	TCP11X1	t-complex 11 family, X-linked 1
B4E2M5	0.53284	ANKRD66	ankyrin repeat domain 66
B5MCN3	0.3316	SEC14L6	SEC14 like lipid binding 6
B5MCY1	0.377017	TDRD15	tudor domain containing 15
B5MD39	0.39149	GGTLC3	gamma-glutamyltransferase light chain family member 3
B5ME19	0.463752	EIF3CL	eukaryotic translation initiation factor 3 subunit C like
B6A8C7	0.39958	TARM1	T cell-interacting, activating receptor on myeloid cells 1
B6SEH8	0.73324	ERVV-1	endogenous retrovirus group V member 1, envelope
B6SEH9	0.569982	ERVV-2	endogenous retrovirus group V member 2, envelope
B7U540	0.36722	KCNJ18	potassium inwardly rectifying channel subfamily J member 18
B7Z1M9	0.53771	C2CD4D	C2 calcium dependent domain containing 4D
B7Z6K7	0.343755	ZNF814	zinc finger protein 814
B7Z8K6	0.55112	TRDC	T cell receptor delta constant
B7ZAQ6	0.30586	GPR89A	G protein-coupled receptor 89A
B7ZBB8	0.51436	PPP1R3G	protein phosphatase 1 regulatory subunit 3G
B7ZC32	0.394651	KIF28P	kinesin family member 28, pseudogene
B7ZLF3	0.32045	LOC728743	Zinc finger and SCAN domain-containing protein 2-like
B7ZW38	0.56973	HNRNPCL3	heterogeneous nuclear ribonucleoprotein C like 3
B8ZZ34	0.36307	SHISA8	shisa family member 8
B9A014	0.48154	C21orf140	chromosome 21 open reading frame 140
B9A064	0.54886	IGLL5	immunoglobulin lambda like polypeptide 5
B9A6J9	0.42417	TBC1D3L	TBC1 domain family member 3L
B9EJG8	0.47779	TMEM150C	transmembrane protein 150C
C4AMC7	0.48081	WASH3P	WASP family homolog 3, pseudogene
C9J069	0.392241	AJM1	apical junction component 1 homolog
C9J1S8	0.3373	TRIM49D1	tripartite motif containing 49D1
C9J202	0.45345	ALG1L2	ALG1 chitobiosyldiphosphodolichol beta-mannosyltransferase like 2
C9J2P7	0.35493	USP17L15	ubiquitin specific peptidase 17 like family member 15
C9J3I9	0.86794	C5orf58	chromosome 5 open reading frame 58
C9J6K1	0.42237	C19orf81	chromosome 19 open reading frame 81
C9J798	0.33889	RASA4B	RAS p21 protein activator 4B
C9JA33	0.541636	PALM2AKAP2	PALM2 and AKAP2 fusion
C9JBD0	0.53926	KRBOX1	KRAB box domain containing 1
C9JCN9	0.87152	HSBP1L1	heat shock factor binding protein 1 like 1
C9JDP6	0.51197	CLDN25	claudin 25
C9JE40	0.491347	PATL2	PAT1 homolog 2
C9JG80	0.3809	NPIPB4	nuclear pore complex interacting protein family member B4
C9JH25	0.40839	PRRT4	proline rich transmembrane protein 4
C9JI98	0.62202	TMEM238	transmembrane protein 238
C9JJ37	0.40666	BTBD19	BTB domain containing 19
C9JJH3	0.35747	USP17L10	ubiquitin specific peptidase 17 like family member 10
C9JL84	0.432448	HHLA1	HHLA1 neighbor of OC90
C9JLJ4	0.35614	USP17L13	ubiquitin specific peptidase 17 like family member 13
C9JLR9	0.461123	ZFTA	zinc finger translocation associated
C9JN71	0.316071	ZNF878	zinc finger protein 878
C9JPN9	0.3611	USP17L12	ubiquitin specific peptidase 17 like family member 12
C9JQI7	0.460634	TMEM232	transmembrane protein 232
C9JR72	0.43305	KBTBD13	kelch repeat and BTB domain containing 13
C9JRZ8	0.56767	AKR1B15	aldo-keto reductase family 1 member B15
C9JSJ3	0.49166	MEIOSIN	meiosis initiator
C9JTQ0	0.52326	ANKRD63	ankyrin repeat domain 63
C9JVI0	0.35859	USP17L11	ubiquitin specific peptidase 17 like family member 11
D3W0D1	0.3695	KLRF2	killer cell lectin like receptor F2
D6R901	0.35868	USP17L21	ubiquitin specific peptidase 17 like family member 21
D6R9N7	0.35966	USP17L18	ubiquitin specific peptidase 17 like family member 18
D6RA61	0.36036	USP17L22	ubiquitin specific peptidase 17 like family member 22
D6RBM5	0.41791	USP17L23	ubiquitin specific peptidase 17 like family member 23
D6RBQ6	0.35974	USP17L17	ubiquitin specific peptidase 17 like family member 17
D6RCP7	0.35798	USP17L19	ubiquitin specific peptidase 17 like family member 19
D6RF30	0.783273	GOLGA8K	golgin A8 family member K
D6RGH6	0.82658	MCIDAS	multiciliate differentiation and DNA synthesis associated cell cycle protein
D6RJB6	0.36001	USP17L20	ubiquitin specific peptidase 17 like family member 20
E2RYF6	0.571016	MUC22	mucin 22
E2RYF7	0.46375	HCG22	HLA complex group 22 (gene/pseudogene)
E5RG02	0.40898	PRSS46P	serine protease 46, pseudogene
E5RHQ5	0.39327	NPIPB11	nuclear pore complex interacting protein family member B11
E5RIL1	0.42743	UPK3BL2	uroplakin 3B like 2
E5RJM6	0.43762	ANKRD65	ankyrin repeat domain 65
E5RQL4	0.42852	FTCDNL1	formiminotransferase cyclodeaminase N-terminal like
E7ERA6	0.3642	RNF223	ring finger protein 223
E7ETH6	0.419723	ZNF587B	zinc finger protein 587B
E7EU14	0.66436
E9PAV3	0.49821	NACA	nascent polypeptide associated complex subunit alpha
E9PB15	0.46694	PTGES3L	prostaglandin E synthase 3 like
E9PGG2	0.42778	ANHX	anomalous homeobox
E9PI22	0.40113	PRR23D1	proline rich 23 domain containing 1
E9PIF3	0.813098	NPIPA2	nuclear pore complex interacting protein family member A2
E9PJI5	0.877608	NPIPA7	nuclear pore complex interacting protein family member A7
E9PKD4	0.835983	NPIPA5	nuclear pore complex interacting protein family member A5
E9PQ18	0.48879	XNDC1N	XRCC1 N-terminal domain containing 1, N-terminal like
E9PQ53	0.51706	NDUFC2-KCTD14	NDUFC2-KCTD14 readthrough
E9PQX1	0.66606	TMEM262	transmembrane protein 262
F2Z333	0.49843	FNDC10	fibronectin type III domain containing 10
F5GYI3	0.37143	UBAP1L	ubiquitin associated protein 1 like
F5H284	0.35465	PPIAL4D	peptidylprolyl isomerase A like 4D
F5H4B4	0.540346	FAM227A	family with sequence similarity 227 member A
F8VTS6	0.46302	RFPL4AL1	ret finger protein like 4A like 1
F8W0I5	0.38133	NPIPB12	nuclear pore complex interacting protein family member B12
F8WBI6	0.826255	GOLGA8N	golgin A8 family member N
F8WFD2	0.832993	NPIPA3	nuclear pore complex interacting protein family member A3
G2XKQ0	0.49165	SUMO1P1	SUMO1 pseudogene 1
G3V0H7	0.61011	SLCO1B7	solute carrier organic anion transporter family member 1B7 (putative)
G9CGD6	0.590516	CNK3/IPCEF1	CNK3/IPCEF1 fusion protein
H0UI37	0.39047	TSTD3	thiosulfate sulfurtransferase like domain containing 3
H0Y354	0.37605	FAM72C	family with sequence similarity 72 member C
H0Y7S4	0.42992	PRAMEF26	PRAME family member 26
H0YKK7	0.749863	GOLGA6L19	golgin A6 family like 19
H0YL14	0.66677	TMEM250	transmembrane protein 250
H0YM25	0.732685	GOLGA6L22	golgin A6 family like 22
H3BNL1	0.37456	C3orf84	chromosome 3 open reading frame 84
H3BNL8	0.5683	ARMH2	armadillo like helical domain containing 2
H3BPF8	0.816436	GOLGA8S	golgin A8 family member S
H3BPM6	0.3296	MKRN2OS	MKRN2 opposite strand
H3BQJ8	0.43438	LY6L	lymphocyte antigen 6 family member L
H3BQL2	0.761417	GOLGA8T	golgin A8 family member T
H3BRN8	0.29606	PIERCE2	piercer of microtubule wall 2
H3BS89	0.51993	TMEM178B	transmembrane protein 178B
H3BSY2	0.833786	GOLGA8M	golgin A8 family member M
H3BUK9	0.57047	POTEB2	POTE ankyrin domain family member B2
H3BV12	0.805029	GOLGA8Q	golgin A8 family member Q
H3BV60	0.49431	TGFBR3L	transforming growth factor beta receptor 3 like
H7BZ55	0.622121	CROCC2	ciliary rootlet coiled-coil, rootletin family member 2
H7C241	0.50851	CLDN34	claudin 34
H7C350	0.81038	CCDC188	coiled-coil domain containing 188
I1YAP6	0.369129	TRIM77	tripartite motif containing 77
I6L899	0.815865	GOLGA8R	golgin A8 family member R
J3QSS5	0.90349	TCP10L2	t-complex 10 like 2 (pseudogene)
K9M1U5	0.50354	IFNL4	interferon lambda 4 (gene/pseudogene)
L0R819	0.68189	ASDURF	ASNSD1 upstream open reading frame
M0QZC1	0.38587	RNF225	ring finger protein 225
M0R2J8	0.394626	DCDC1	doublecortin domain containing 1
M5A8F1	0.37408	ERVH48-1	endogenous retrovirus group 48 member 1, envelope
O00110	0.30378	OVOL3	ovo like zinc finger 3
O00115	0.40134	DNASE2	deoxyribonuclease 2, lysosomal
O00116	0.30325	AGPS	alkylglycerone phosphate synthase
O00124	0.586085	UBXN8	UBX domain protein 8
O00139	0.464588	KIF2A	kinesin family member 2A
O00141	0.51876	SGK1	serum/glucocorticoid regulated kinase 1
O00142	0.71338	TK2	thymidine kinase 2
O00144	0.388667	FZD9	frizzled class receptor 9
O00148	0.69626	DDX39A	DExD-box helicase 39A
O00151	0.464257	PDLIM1	PDZ and LIM domain 1
O00154	0.37866	ACOT7	acyl-CoA thioesterase 7
O00155	0.39953	GPR25	G protein-coupled receptor 25
O00159	0.392151	MYO1C	myosin IC
O00160	0.36017	MYO1F	myosin IF
O00161	0.57144	SNAP23	synaptosome associated protein 23
O00167	0.48965	EYA2	EYA transcriptional coactivator and phosphatase 2
O00170	0.522057	AIP	aryl hydrocarbon receptor interacting protein
O00175	0.46536	CCL24	C-C motif chemokine ligand 24
O00178	0.63969	GTPBP1	GTP binding protein 1
O00180	0.35097	KCNK1	potassium two pore domain channel subfamily K member 1
O00182	0.62588	LGALS9	galectin 9
O00186	0.33995	STXBP3	syntaxin binding protein 3
O00187	0.359982	MASP2	MBL associated serine protease 2
O00189	0.38107	AP4M1	adaptor related protein complex 4 subunit mu 1
O00192	0.45946	ARVCF	ARVCF delta catenin family member
O00194	0.68017	RAB27B	RAB27B, member RAS oncogene family
O00203	0.448353	AP3B1	adaptor related protein complex 3 subunit beta 1
O00204	0.40402	SULT2B1	sulfotransferase family 2B member 1
O00206	0.517508	TLR4	toll like receptor 4
O00212	0.70772	RHOD	ras homolog family member D
O00213	0.482524	APBB1	amyloid beta precursor protein binding family B member 1
O00214	0.637121	LGALS8	galectin 8
O00217	0.34848	NDUFS8	NADH:ubiquinone oxidoreductase core subunit S8
O00219	0.34323	HAS3	hyaluronan synthase 3
O00220	0.390772	TNFRSF10A	TNF receptor superfamily member 10a
O00221	0.50652	NFKBIE	NFKB inhibitor epsilon
O00222	0.622736	GRM8	glutamate metabotropic receptor 8
O00231	0.57291	PSMD11	proteasome 26S subunit, non-ATPase 11
O00232	0.504856	PSMD12	proteasome 26S subunit, non-ATPase 12
O00233	0.575216	PSMD9	proteasome 26S subunit, non-ATPase 9
O00237	0.347982	RNF103	ring finger protein 103
O00238	0.48016	BMPR1B	bone morphogenetic protein receptor type 1B
O00241	0.59475	SIRPB1	signal regulatory protein beta 1
O00244	0.67191	ATOX1	antioxidant 1 copper chaperone
O00254	0.40196	F2RL2	coagulation factor II thrombin receptor like 2
O00255	0.49791	MEN1	menin 1
O00257	0.43292	CBX4	chromobox 4
O00258	0.86152	GET1	guided entry of tail-anchored proteins factor 1
O00264	0.36127	PGRMC1	progesterone receptor membrane component 1
O00267	0.516549	SUPT5H	SPT5 homolog, DSIF elongation factor subunit
O00268	0.474364	TAF4	TATA-box binding protein associated factor 4
O00270	0.37424	GPR31	G protein-coupled receptor 31
O00273	0.509424	DFFA	DNA fragmentation factor subunit alpha
O00291	0.564856	HIP1	huntingtin interacting protein 1
O00292	0.3079	LEFTY2	left-right determination factor 2
O00294	0.36801	TULP1	TUB like protein 1
O00295	0.36112	TULP2	TUB like protein 2
O00299	0.39938	CLIC1	chloride intracellular channel 1
O00300	0.337995	TNFRSF11B	TNF receptor superfamily member 11b
O00303	0.431736	EIF3F	eukaryotic translation initiation factor 3 subunit F
O00305	0.4182	CACNB4	calcium voltage-gated channel auxiliary subunit beta 4
O00308	0.468783	WWP2	WW domain containing E3 ubiquitin protein ligase 2
O00311	0.48153	CDC7	cell division cycle 7
O00321	0.5308	ETV2	ETS variant transcription factor 2
O00322	0.44074	UPK1A	uroplakin 1A
O00327	0.358541	BMAL1	basic helix-loop-helix ARNT like 1
O00329	0.288454	PIK3CD	phosphatidylinositol-4,5-bisphosphate 3-kinase catalytic subunit delta
O00330	0.479339	PDHX	pyruvate dehydrogenase complex component X
O00337	0.520737	SLC28A1	solute carrier family 28 member 1
O00338	0.46512	SULT1C2	sulfotransferase family 1C member 2
O00339	0.624771	MATN2	matrilin 2
O00341	0.434745	SLC1A7	solute carrier family 1 member 7
O00358	0.55373	FOXE1	forkhead box E1
O00370	0.435414		LINE-1 retrotransposable element ORF2 protein (ORF2p) [Includes: Reverse transcriptase (EC 2.7.7.49); Endonuclease (EC 3.1.21.-)]
O00391	0.3979	QSOX1	quiescin sulfhydryl oxidase 1
O00398	0.39342	P2RY10	P2Y receptor family member 10
O00399	0.78809	DCTN6	dynactin subunit 6
O00400	0.67156	SLC33A1	solute carrier family 33 member 1
O00401	0.451564	WASL	WASP like actin nucleation promoting factor
O00408	0.48451	PDE2A	phosphodiesterase 2A
O00409	0.62939	FOXN3	forkhead box N3
O00410	0.29423	IPO5	importin 5
O00411	0.25793	POLRMT	RNA polymerase mitochondrial
O00418	0.34696	EEF2K	eukaryotic elongation factor 2 kinase
O00421	0.40651	CCRL2	C-C motif chemokine receptor like 2
O00422	0.40456	SAP18	Sin3A associated protein 18
O00423	0.389	EML1	EMAP like 1
O00425	0.537917	IGF2BP3	insulin like growth factor 2 mRNA binding protein 3
O00429	0.46729	DNM1L	dynamin 1 like
O00442	0.89442	RTCA	RNA 3'-terminal phosphate cyclase
O00443	0.303531	PIK3C2A	phosphatidylinositol-4-phosphate 3-kinase catalytic subunit type 2 alpha
O00444	0.48004	PLK4	polo like kinase 4
O00445	0.53409	SYT5	synaptotagmin 5
O00451	0.32138	GFRA2	GDNF family receptor alpha 2
O00458	0.47822	IFRD1	interferon related developmental regulator 1
O00459	0.500373	PIK3R2	phosphoinositide-3-kinase regulatory subunit 2
O00461	0.653029	GOLIM4	golgi integral membrane protein 4
O00462	0.29177	MANBA	mannosidase beta
O00463	0.468402	TRAF5	TNF receptor associated factor 5
O00468	0.435729	AGRN	agrin
O00469	0.29465	PLOD2	procollagen-lysine,2-oxoglutarate 5-dioxygenase 2
O00470	0.494351	MEIS1	Meis homeobox 1
O00471	0.448697	EXOC5	exocyst complex component 5
O00472	0.479393	ELL2	elongation factor for RNA polymerase II 2
O00476	0.490989	SLC17A3	solute carrier family 17 member 3
O00478	0.571308	BTN3A3	butyrophilin subfamily 3 member A3
O00481	0.575746	BTN3A1	butyrophilin subfamily 3 member A1
O00482	0.414891	NR5A2	nuclear receptor subfamily 5 group A member 2
O00483	0.45404	NDUFA4	NDUFA4 mitochondrial complex associated
O00487	0.447668	PSMD14	proteasome 26S subunit, non-ATPase 14
O00488	0.35315	ZNF593	zinc finger protein 593
O00499	0.510369	BIN1	bridging integrator 1
O00501	0.56757	CLDN5	claudin 5
O00505	0.52399	KPNA3	karyopherin subunit alpha 3
O00506	0.548086	STK25	serine/threonine kinase 25
O00507	0.414988	USP9Y	ubiquitin specific peptidase 9 Y-linked
O00519	0.69623	FAAH	fatty acid amide hydrolase
O00522	0.375708	KRIT1	KRIT1 ankyrin repeat containing
O00526	0.60537	UPK2	uroplakin 2
O00533	0.410992	CHL1	cell adhesion molecule L1 like
O00534	0.31389	VWA5A	von Willebrand factor A domain containing 5A
O00541	0.369571	PES1	pescadillo ribosomal biogenesis factor 1
O00548	0.337589	DLL1	delta like canonical Notch ligand 1
O00555	0.38563	CACNA1A	calcium voltage-gated channel subunit alpha1 A
O00560	0.48021	SDCBP	syndecan binding protein
O00562	0.413161	PITPNM1	phosphatidylinositol transfer protein membrane associated 1
O00566	0.414025	MPHOSPH10	M-phase phosphoprotein 10
O00567	0.711996	NOP56	NOP56 ribonucleoprotein
O00570	0.43683	SOX1	SRY-box transcription factor 1
O00571	0.779549	DDX3X	DEAD-box helicase 3 X-linked
O00574	0.38581	CXCR6	C-X-C motif chemokine receptor 6
O00584	0.36517	RNASET2	ribonuclease T2
O00585	0.51843	CCL21	C-C motif chemokine ligand 21
O00587	0.54573	MFNG	MFNG O-fucosylpeptide 3-beta-N-acetylglucosaminyltransferase
O00590	0.39267	ACKR2	atypical chemokine receptor 2
O00591	0.34479	GABRP	gamma-aminobutyric acid type A receptor subunit pi
O00592	0.3721	PODXL	podocalyxin like
O00602	0.37298	FCN1	ficolin 1
O00622	0.339557	CCN1	cellular communication network factor 1
O00623	0.460607	PEX12	peroxisomal biogenesis factor 12
O00624	0.79201	SLC17A2	solute carrier family 17 member 2
O00625	0.35667	PIR	pirin
O00626	0.45878	CCL22	C-C motif chemokine ligand 22
O00628	0.68718	PEX7	peroxisomal biogenesis factor 7
O00629	0.51224	KPNA4	karyopherin subunit alpha 4
O00634	0.394211	NTN3	netrin 3
O00635	0.515446	TRIM38	tripartite motif containing 38
O00712	0.35329	NFIB	nuclear factor I B
O00716	0.529891	E2F3	E2F transcription factor 3
O00743	0.55315	PPP6C	protein phosphatase 6 catalytic subunit
O00744	0.37232	WNT10B	Wnt family member 10B
O00746	0.9432	NME4	NME/NM23 nucleoside diphosphate kinase 4
O00748	0.35839	CES2	carboxylesterase 2
O00750	0.311807	PIK3C2B	phosphatidylinositol-4-phosphate 3-kinase catalytic subunit type 2 beta
O00754	0.33095	MAN2B1	mannosidase alpha class 2B member 1
O00755	0.34654	WNT7A	Wnt family member 7A
O00757	0.74528	FBP2	fructose-bisphosphatase 2
O00762	0.44736	UBE2C	ubiquitin conjugating enzyme E2 C
O00763	0.495348	ACACB	acetyl-CoA carboxylase beta
O00764	0.64139	PDXK	pyridoxal kinase
O00767	0.33458	SCD	stearoyl-CoA desaturase
O14490	0.69543	DLGAP1	DLG associated protein 1
O14492	0.495139	SH2B2	SH2B adaptor protein 2
O14493	0.57341	CLDN4	claudin 4
O14494	0.54172	PLPP1	phospholipid phosphatase 1
O14495	0.54094	PLPP3	phospholipid phosphatase 3
O14497	0.408919	ARID1A	AT-rich interaction domain 1A
O14498	0.38807	ISLR	immunoglobulin superfamily containing leucine rich repeat
O14503	0.64236	BHLHE40	basic helix-loop-helix family member e40
O14508	0.36871	SOCS2	suppressor of cytokine signaling 2
O14511	0.62009	NRG2	neuregulin 2
O14512	0.3762	SOCS7	suppressor of cytokine signaling 7
O14513	0.748911	NCKAP5	NCK associated protein 5
O14514	0.400367	ADGRB1	adhesion G protein-coupled receptor B1
O14519	0.73504	CDK2AP1	cyclin dependent kinase 2 associated protein 1
O14520	0.56601	AQP7	aquaporin 7
O14521	0.58318	SDHD	succinate dehydrogenase complex subunit D
O14522	0.450754	PTPRT	protein tyrosine phosphatase receptor type T
O14523	0.432196	C2CD2L	C2CD2 like
O14524	0.348562	NEMP1	nuclear envelope integral membrane protein 1
O14525	0.343326	ASTN1	astrotactin 1
O14526	0.479327	FCHO1	FCH and mu domain containing endocytic adaptor 1
O14529	0.608989	CUX2	cut like homeobox 2
O14530	0.42058	TXNDC9	thioredoxin domain containing 9
O14531	0.79424	DPYSL4	dihydropyrimidinase like 4
O14543	0.38468	SOCS3	suppressor of cytokine signaling 3
O14544	0.37576	SOCS6	suppressor of cytokine signaling 6
O14545	0.396887	TRAFD1	TRAF-type zinc finger domain containing 1
O14548	0.5353	COX7A2L	cytochrome c oxidase subunit 7A2 like
O14556	0.76488	GAPDHS	glyceraldehyde-3-phosphate dehydrogenase, spermatogenic
O14558	0.536796	HSPB6	heat shock protein family B (small) member 6
O14559	0.434944	ARHGAP33	Rho GTPase activating protein 33
O14561	0.45973	NDUFAB1	NADH:ubiquinone oxidoreductase subunit AB1
O14562	0.511642	UBFD1	ubiquitin family domain containing 1
O14569	0.51871	CYB561D2	cytochrome b561 family member D2
O14576	0.67907	DYNC1I1	dynein cytoplasmic 1 intermediate chain 1
O14578	0.582107	CIT	citron rho-interacting serine/threonine kinase
O14579	0.51373	COPE	COPI coat complex subunit epsilon
O14581	0.40095	OR7A17	olfactory receptor family 7 subfamily A member 17
O14593	0.48818	RFXANK	regulatory factor X associated ankyrin containing protein
O14594	0.345732	NCAN	neurocan
O14595	0.5318	CTDSP2	CTD small phosphatase 2
O14602	0.80019	EIF1AY	eukaryotic translation initiation factor 1A Y-linked
O14607	0.472286	UTY	ubiquitously transcribed tetratricopeptide repeat containing, Y-linked
O14610	0.48121	GNGT2	G protein subunit gamma transducin 2
O14617	0.47222	AP3D1	adaptor related protein complex 3 subunit delta 1
O14618	0.43835	CCS	copper chaperone for superoxide dismutase
O14625	0.45765	CXCL11	C-X-C motif chemokine ligand 11
O14626	0.39527	GPR171	G protein-coupled receptor 171
O14627	0.54999	CDX4	caudal type homeobox 4
O14628	0.369329	ZNF195	zinc finger protein 195
O14638	0.30082	ENPP3	ectonucleotide pyrophosphatase/phosphodiesterase 3
O14639	0.344715	ABLIM1	actin binding LIM protein 1
O14640	0.48839	DVL1	dishevelled segment polarity protein 1
O14641	0.480795	DVL2	dishevelled segment polarity protein 2
O14645	0.47277	DNALI1	dynein axonemal light intermediate chain 1
O14646	0.468586	CHD1	chromodomain helicase DNA binding protein 1
O14647	0.453161	CHD2	chromodomain helicase DNA binding protein 2
O14649	0.3205	KCNK3	potassium two pore domain channel subfamily K member 3
O14653	0.750707	GOSR2	golgi SNAP receptor complex member 2
O14654	0.35689	IRS4	insulin receptor substrate 4
O14656	0.60474	TOR1A	torsin family 1 member A
O14657	0.59341	TOR1B	torsin family 1 member B
O14662	0.661074	STX16	syntaxin 16
O14668	0.48398	PRRG1	proline rich and Gla domain 1
O14672	0.34376	ADAM10	ADAM metallopeptidase domain 10
O14678	0.34056	ABCD4	ATP binding cassette subfamily D member 4
O14681	0.60882	EI24	EI24 autophagy associated transmembrane protein
O14682	0.499102	ENC1	ectodermal-neural cortex 1
O14683	0.60196	TP53I11	tumor protein p53 inducible protein 11
O14684	0.49383	PTGES	prostaglandin E synthase
O14709	0.390684	ZNF197	zinc finger protein 197
O14713	0.47421	ITGB1BP1	integrin subunit beta 1 binding protein 1
O14715	0.413256	RGPD8	RANBP2 like and GRIP domain containing 8
O14717	0.70223	TRDMT1	tRNA aspartic acid methyltransferase 1
O14718	0.3944	RRH	retinal pigment epithelium-derived rhodopsin homolog
O14727	0.765663	APAF1	apoptotic peptidase activating factor 1
O14730	0.771585	RIOK3	RIO kinase 3
O14732	0.82555	IMPA2	inositol monophosphatase 2
O14733	0.55869	MAP2K7	mitogen-activated protein kinase kinase 7
O14734	0.34112	ACOT8	acyl-CoA thioesterase 8
O14735	0.56951	CDIPT	CDP-diacylglycerol--inositol 3-phosphatidyltransferase
O14737	0.61779	PDCD5	programmed cell death 5
O14744	0.38216	PRMT5	protein arginine methyltransferase 5
O14745	0.439764	SLC9A3R1	Na(+)/H(+) exchange regulatory cofactor NHE-RF1 (NHERF-1) (Ezrin-radixin-moesin-binding phosphoprotein 50) (EBP50) (Regulatory cofactor of Na(+)/H(+) exchanger) (Sodium-hydrogen exchanger regulatory factor 1) (Solute carrier family 9 isoform A3 regulatory factor 1)
O14746	0.346419	TERT	telomerase reverse transcriptase
O14753	0.42792	OVOL1	ovo like transcriptional repressor 1
O14756	0.60949	HSD17B6	hydroxysteroid 17-beta dehydrogenase 6
O14757	0.579768	CHEK1	checkpoint kinase 1
O14763	0.388722	TNFRSF10B	TNF receptor superfamily member 10b
O14764	0.3514	GABRD	gamma-aminobutyric acid type A receptor subunit delta
O14770	0.504289	MEIS2	Meis homeobox 2
O14771	0.337231	ZNF213	zinc finger protein 213
O14772	0.43604	FPGT	fucose-1-phosphate guanylyltransferase
O14773	0.33097	TPP1	tripeptidyl peptidase 1
O14775	0.66244	GNB5	G protein subunit beta 5
O14776	0.47377	TCERG1	transcription elongation regulator 1
O14777	0.657193	NDC80	NDC80 kinetochore complex component
O14782	0.477664	KIF3C	kinesin family member 3C
O14786	0.538561	NRP1	neuropilin 1
O14787	0.34833	TNPO2	transportin 2
O14788	0.47033	TNFSF11	TNF superfamily member 11
O14791	0.590555	APOL1	apolipoprotein L1
O14792	0.46046	HS3ST1	heparan sulfate-glucosamine 3-sulfotransferase 1
O14793	0.49343	MSTN	myostatin
O14795	0.442548	UNC13B	unc-13 homolog B
O14796	0.41481	SH2D1B	SH2 domain containing 1B
O14798	0.31577	TNFRSF10C	TNF receptor superfamily member 10c
O14802	0.88298	POLR3A	RNA polymerase III subunit A
O14804	0.40481	TAAR5	trace amine associated receptor 5
O14807	0.72996	MRAS	muscle RAS oncogene homolog
O14813	0.54745	PHOX2A	paired like homeobox 2A
O14815	0.31985	CAPN9	calpain 9
O14817	0.44782	TSPAN4	tetraspanin 4
O14818	0.9255	PSMA7	proteasome 20S subunit alpha 7
O14827	0.388403	RASGRF2	Ras protein specific guanine nucleotide releasing factor 2
O14828	0.55923	SCAMP3	secretory carrier membrane protein 3
O14829	0.474485	PPEF1	protein phosphatase with EF-hand domain 1
O14830	0.3607	PPEF2	protein phosphatase with EF-hand domain 2
O14832	0.35381	PHYH	phytanoyl-CoA 2-hydroxylase
O14836	0.39209	TNFRSF13B	TNF receptor superfamily member 13B
O14841	0.680913	OPLAH	5-oxoprolinase, ATP-hydrolysing
O14842	0.40599	FFAR1	free fatty acid receptor 1
O14843	0.38861	FFAR3	free fatty acid receptor 3
O14862	0.563303	AIM2	absent in melanoma 2
O14863	0.80306	SLC30A4	solute carrier family 30 member 4
O14867	0.480083	BACH1	BTB domain and CNC homolog 1
O14874	0.33903	BCKDK	branched chain keto acid dehydrogenase kinase
O14879	0.4875	IFIT3	interferon induced protein with tetratricopeptide repeats 3
O14880	0.50797	MGST3	microsomal glutathione S-transferase 3
O14893	0.41608	GEMIN2	gem nuclear organelle associated protein 2
O14894	0.5419	TM4SF5	transmembrane 4 L six family member 5
O14896	0.400153	IRF6	interferon regulatory factor 6
O14901	0.32698	KLF11	KLF transcription factor 11
O14904	0.37718	WNT9A	Wnt family member 9A
O14907	0.38159	TAX1BP3	Tax1 binding protein 3
O14908	0.33113	GIPC1	GIPC PDZ domain containing family member 1
O14910	0.501289	LIN7A	lin-7 homolog A, crumbs cell polarity complex component
O14917	0.539488	PCDH17	protocadherin 17
O14920	0.28674	IKBKB	inhibitor of nuclear factor kappa B kinase subunit beta
O14921	0.45327	RGS13	regulator of G protein signaling 13
O14924	0.414972	RGS12	regulator of G protein signaling 12
O14925	0.66564	TIMM23	translocase of inner mitochondrial membrane 23
O14926	0.30213	FSCN2	fascin actin-bundling protein 2, retinal
O14929	0.32963	HAT1	histone acetyltransferase 1
O14931	0.55919	NCR3	natural cytotoxicity triggering receptor 3
O14933	0.46363	UBE2L6	ubiquitin conjugating enzyme E2 L6
O14936	0.536382	CASK	calcium/calmodulin dependent serine protein kinase
O14939	0.32192	PLD2	phospholipase D2
O14948	0.54867	TFEC	transcription factor EC
O14949	0.41845	UQCRQ	ubiquinol-cytochrome c reductase complex III subunit VII
O14950	0.499675	MYL12B	myosin light chain 12B
O14957	0.50081	UQCR11	ubiquinol-cytochrome c reductase, complex III subunit XI
O14958	0.33554	CASQ2	calsequestrin 2
O14960	0.43911	LECT2	leukocyte cell derived chemotaxin 2
O14964	0.519515	HGS	hepatocyte growth factor-regulated tyrosine kinase substrate
O14965	0.61007	AURKA	aurora kinase A
O14966	0.70433	RAB29	RAB29, member RAS oncogene family
O14967	0.53781	CLGN	calmegin
O14972	0.37115	VPS26C	VPS26 endosomal protein sorting factor C
O14974	0.506293	PPP1R12A	protein phosphatase 1 regulatory subunit 12A
O14975	0.367321	SLC27A2	solute carrier family 27 member 2
O14976	0.454602	GAK	cyclin G associated kinase
O14977	0.76479	AZIN1	antizyme inhibitor 1
O14978	0.414692	ZNF263	zinc finger protein 263
O14979	0.577744	HNRNPDL	heterogeneous nuclear ribonucleoprotein D like
O14980	0.47505	XPO1	exportin 1
O14981	0.485	BTAF1	B-TFIID TATA-box binding protein associated factor 1
O14983	0.59087	ATP2A1	ATPase sarcoplasmic/endoplasmic reticulum Ca2+ transporting 1
O14986	0.41532	PIP5K1B	phosphatidylinositol-4-phosphate 5-kinase type 1 beta
O14990	0.53509	PPP1R2C	PPP1R2C family member C
O14994	0.78719	SYN3	synapsin III
O15013	0.67745	ARHGEF10	Rho guanine nucleotide exchange factor 10
O15014	0.65504	ZNF609	zinc finger protein 609
O15016	0.411405	TRIM66	tripartite motif containing 66
O15020	0.506023	SPTBN2	spectrin beta, non-erythrocytic 2
O15021	0.523829	MAST4	microtubule associated serine/threonine kinase family member 4
O15027	0.34297	SEC16A	SEC16 homolog A, endoplasmic reticulum export factor
O15031	0.419959	PLXNB2	plexin B2
O15033	0.382152	AREL1	apoptosis resistant E3 ubiquitin protein ligase 1
O15034	0.540869	RIMBP2	RIMS binding protein 2
O15037	0.432595	KHNYN	KH and NYN domain containing
O15040	0.473584	TECPR2	tectonin beta-propeller repeat containing 2
O15041	0.39375	SEMA3E	semaphorin 3E
O15042	0.503529	U2SURP	U2 snRNP associated SURP domain containing
O15047	0.478093	SETD1A	SET domain containing 1A, histone lysine methyltransferase
O15049	0.902297	N4BP3	NEDD4 binding protein 3
O15054	0.374701	KDM6B	lysine demethylase 6B
O15055	0.354646	PER2	period circadian regulator 2
O15056	0.26401	SYNJ2	synaptojanin 2
O15060	0.401935	ZBTB39	zinc finger and BTB domain containing 39
O15061	0.758956	SYNM	synemin
O15062	0.365573	ZBTB5	zinc finger and BTB domain containing 5
O15063	0.428973	GARRE1	granule associated Rac and RHOG effector 1
O15066	0.479626	KIF3B	kinesin family member 3B
O15067	0.53446	PFAS	phosphoribosylformylglycinamidine synthase
O15068	0.34545	MCF2L	MCF.2 cell line derived transforming sequence like
O15069	0.411965	NACAD	NAC alpha domain containing
O15072	0.376213	ADAMTS3	ADAM metallopeptidase with thrombospondin type 1 motif 3
O15075	0.549541	DCLK1	doublecortin like kinase 1
O15078	0.642388	CEP290	centrosomal protein 290
O15079	0.6746	SNPH	syntaphilin
O15083	0.681192	ERC2	ELKS/RAB6-interacting/CAST family member 2
O15084	0.29382	ANKRD28	ankyrin repeat domain 28
O15085	0.450699	ARHGEF11	Rho guanine nucleotide exchange factor 11
O15090	0.430497	ZNF536	zinc finger protein 536
O15091	0.37627	PRORP	protein only RNase P catalytic subunit
O15105	0.33286	SMAD7	SMAD family member 7
O15111	0.29137	CHUK	component of inhibitor of nuclear factor kappa B kinase complex
O15116	0.4741	LSM1	LSM1 homolog, mRNA degradation associated
O15117	0.474045	FYB1	FYN binding protein 1
O15118	0.374459	NPC1	NPC intracellular cholesterol transporter 1
O15119	0.41562	TBX3	T-box transcription factor 3
O15120	0.44178	AGPAT2	1-acylglycerol-3-phosphate O-acyltransferase 2
O15121	0.38745	DEGS1	delta 4-desaturase, sphingolipid 1
O15123	0.516389	ANGPT2	angiopoietin 2
O15126	0.55549	SCAMP1	secretory carrier membrane protein 1
O15127	0.56659	SCAMP2	secretory carrier membrane protein 2
O15131	0.50785	KPNA5	karyopherin subunit alpha 5
O15143	0.69104	ARPC1B	actin related protein 2/3 complex subunit 1B
O15144	0.3413	ARPC2	actin related protein 2/3 complex subunit 2
O15145	0.41751	ARPC3	actin related protein 2/3 complex subunit 3
O15146	0.519114	MUSK	muscle associated receptor tyrosine kinase
O15151	0.422545	MDM4	MDM4 regulator of p53
O15155	0.79033	BET1	Bet1 golgi vesicular membrane trafficking protein
O15156	0.30557	ZBTB7B	zinc finger and BTB domain containing 7B
O15160	0.51456	POLR1C	RNA polymerase I and III subunit C
O15162	0.38117	PLSCR1	phospholipid scramblase 1
O15164	0.471766	TRIM24	tripartite motif containing 24
O15169	0.486571	AXIN1	axin 1
O15173	0.34852	PGRMC2	progesterone receptor membrane component 2
O15178	0.44984	TBXT	T-box transcription factor T
O15182	0.36982	CETN3	centrin 3
O15194	0.53478	CTDSPL	CTD small phosphatase like
O15195	0.281523	VILL	villin like
O15197	0.440463	EPHB6	EPH receptor B6
O15198	0.37349	SMAD9	SMAD family member 9
O15204	0.39702	ADAMDEC1	ADAM like decysin 1
O15205	0.499355	UBD	ubiquitin D
O15209	0.374594	ZBTB22	zinc finger and BTB domain containing 22
O15211	0.344829	RGL2	ral guanine nucleotide dissociation stimulator like 2
O15212	0.79846	PFDN6	prefoldin subunit 6
O15213	0.55177	WDR46	WD repeat domain 46
O15217	0.38721	GSTA4	glutathione S-transferase alpha 4
O15218	0.40582	GPR182	G protein-coupled receptor 182
O15226	0.480322	NKRF	NFKB repressing factor
O15228	0.32327	GNPAT	glyceronephosphate O-acyltransferase
O15229	0.69016	KMO	kynurenine 3-monooxygenase
O15231	0.4563	ZNF185	zinc finger protein 185 with LIM domain
O15232	0.69987	MATN3	matrilin 3
O15234	0.35797	CASC3	CASC3 exon junction complex subunit
O15235	0.61559	MRPS12	mitochondrial ribosomal protein S12
O15239	0.45803	NDUFA1	NADH:ubiquinone oxidoreductase subunit A1
O15240	0.85051	VGF	VGF nerve growth factor inducible
O15243	0.54844	LEPROT	leptin receptor overlapping transcript
O15244	0.69724	SLC22A2	solute carrier family 22 member 2
O15245	0.70702	SLC22A1	solute carrier family 22 member 1
O15247	0.38689	CLIC2	chloride intracellular channel 2
O15254	0.29793	ACOX3	acyl-CoA oxidase 3, pristanoyl
O15258	0.44703	RER1	retention in endoplasmic reticulum sorting receptor 1
O15259	0.414172	NPHP1	nephrocystin 1
O15260	0.39627	SURF4	surfeit 4
O15264	0.49098	MAPK13	mitogen-activated protein kinase 13
O15265	0.42591	ATXN7	ataxin 7
O15266	0.55096	SHOX	SHOX homeobox
O15269	0.83671	SPTLC1	serine palmitoyltransferase long chain base subunit 1
O15270	0.72347	SPTLC2	serine palmitoyltransferase long chain base subunit 2
O15273	0.44769	TCAP	titin-cap
O15287	0.52828	FANCG	FA complementation group G
O15294	0.563806	OGT	O-linked N-acetylglucosamine (GlcNAc) transferase
O15296	0.37318	ALOX15B	arachidonate 15-lipoxygenase type B
O15297	0.49637	PPM1D	protein phosphatase, Mg2+/Mn2+ dependent 1D
O15303	0.56594	GRM6	glutamate metabotropic receptor 6
O15304	0.45604	SIVA1	SIVA1 apoptosis inducing factor
O15305	0.45796	PMM2	phosphomannomutase 2
O15315	0.75931	RAD51B	RAD51 paralog B
O15318	0.38048	POLR3G	RNA polymerase III subunit G
O15321	0.29589	TM9SF1	transmembrane 9 superfamily member 1
O15327	0.26705	INPP4B	inositol polyphosphate-4-phosphatase type II B
O15335	0.44676	CHAD	chondroadherin
O15342	0.60886	ATP6V0E1	ATPase H+ transporting V0 subunit e1
O15344	0.452556	MID1	midline 1
O15347	0.46863	HMGB3	high mobility group box 3
O15350	0.436282	TP73	tumor protein p73
O15353	0.6303	FOXN1	forkhead box N1
O15354	0.38325	GPR37	G protein-coupled receptor 37
O15355	0.55119	PPM1G	protein phosphatase, Mg2+/Mn2+ dependent 1G
O15357	0.452575	INPPL1	inositol polyphosphate phosphatase like 1
O15360	0.384471	FANCA	FA complementation group A
O15370	0.41658	SOX12	SRY-box transcription factor 12
O15371	0.32079	EIF3D	eukaryotic translation initiation factor 3 subunit D
O15372	0.32966	EIF3H	eukaryotic translation initiation factor 3 subunit H
O15374	0.72092	SLC16A4	solute carrier family 16 member 4
O15375	0.83256	SLC16A5	solute carrier family 16 member 5
O15379	0.78313	HDAC3	histone deacetylase 3
O15381	0.869487	NVL	nuclear VCP like
O15382	0.73088	BCAT2	branched chain amino acid transaminase 2
O15389	0.473365	SIGLEC5	sialic acid binding Ig like lectin 5
O15391	0.33566	YY2	YY2 transcription factor
O15392	0.44433	BIRC5	baculoviral IAP repeat containing 5
O15393	0.33371	TMPRSS2	transmembrane serine protease 2
O15394	0.519256	NCAM2	neural cell adhesion molecule 2
O15397	0.482571	IPO8	importin 8
O15399	0.560862	GRIN2D	glutamate ionotropic receptor NMDA type subunit 2D
O15400	0.662604	STX7	syntaxin 7
O15403	0.80379	SLC16A6	solute carrier family 16 member 6
O15405	0.670337	TOX3	TOX high mobility group box family member 3
O15409	0.636041	FOXP2	forkhead box P2
O15427	0.84851	SLC16A3	solute carrier family 16 member 3
O15431	0.52646	SLC31A1	solute carrier family 31 member 1
O15432	0.50695	SLC31A2	solute carrier family 31 member 2
O15438	0.307619	ABCC3	ATP binding cassette subfamily C member 3
O15439	0.29968	ABCC4	ATP binding cassette subfamily C member 4
O15440	0.32407	ABCC5	ATP binding cassette subfamily C member 5
O15442	0.61279	MPPED1	metallophosphoesterase domain containing 1
O15444	0.47579	CCL25	C-C motif chemokine ligand 25
O15446	0.34015	POLR1G	RNA polymerase I subunit G
O15455	0.449534	TLR3	toll like receptor 3
O15457	0.394138	MSH4	mutS homolog 4
O15460	0.61257	P4HA2	prolyl 4-hydroxylase subunit alpha 2
O15466	0.48023	ST8SIA5	ST8 alpha-N-acetyl-neuraminide alpha-2,8-sialyltransferase 5
O15467	0.48331	CCL16	C-C motif chemokine ligand 16
O15479	0.533014	MAGEB2	MAGE family member B2
O15480	0.34884	MAGEB3	MAGE family member B3
O15481	0.37895	MAGEB4	MAGE family member B4
O15482	0.715933	TEX28	testis expressed 28
O15484	0.33812	CAPN5	calpain 5
O15488	0.5831	GYG2	glycogenin 2
O15492	0.46699	RGS16	regulator of G protein signaling 16
O15496	0.39183	PLA2G10	phospholipase A2 group X
O15498	0.40276	YKT6	YKT6 v-SNARE homolog
O15499	0.54753	GSC2	goosecoid homeobox 2
O15503	0.43596	INSIG1	insulin induced gene 1
O15504	0.5144	NUP42	nucleoporin 42
O15511	0.39562	ARPC5	actin related protein 2/3 complex subunit 5
O15514	0.66873	POLR2D	RNA polymerase II subunit D
O15516	0.466987	CLOCK	clock circadian regulator
O15519	0.452387	CFLAR	CASP8 and FADD like apoptosis regulator
O15520	0.38774	FGF10	fibroblast growth factor 10
O15522	0.52325	NKX2-8	NK2 homeobox 8
O15523	0.770521	DDX3Y	DEAD-box helicase 3 Y-linked
O15524	0.36781	SOCS1	suppressor of cytokine signaling 1
O15525	0.70524	MAFG	MAF bZIP transcription factor G
O15527	0.52282	OGG1	8-oxoguanine DNA glycosylase
O15528	0.31451	CYP27B1	cytochrome P450 family 27 subfamily B member 1
O15529	0.39456	GPR42	G protein-coupled receptor 42
O15530	0.537723	PDPK1	3-phosphoinositide dependent protein kinase 1
O15533	0.43732	TAPBP	TAP binding protein
O15534	0.355686	PER1	period circadian regulator 1
O15535	0.387888	ZSCAN9	zinc finger and SCAN domain containing 9
O15537	0.49605	RS1	retinoschisin 1
O15539	0.4722	RGS5	regulator of G protein signaling 5
O15540	0.47846	FABP7	fatty acid binding protein 7
O15541	0.417595	RNF113A	ring finger protein 113A
O15547	0.29763	P2RX6	purinergic receptor P2X 6
O15550	0.443699	KDM6A	lysine demethylase 6A
O15551	0.57899	CLDN3	claudin 3
O15552	0.39225	FFAR2	free fatty acid receptor 2
O15553	0.529707	MEFV	MEFV innate immunity regulator, pyrin
O15554	0.668103	KCNN4	potassium calcium-activated channel subfamily N member 4
O43143	0.563378	DHX15	DEAH-box helicase 15
O43147	0.373757	SGSM2	small G protein signaling modulator 2
O43148	0.62402	RNMT	RNA guanine-7 methyltransferase
O43150	0.443971	ASAP2	ArfGAP with SH3 domain, ankyrin repeat and PH domain 2
O43151	0.325447	TET3	tet methylcytosine dioxygenase 3
O43155	0.491807	FLRT2	fibronectin leucine rich transmembrane protein 2
O43156	0.461509	TTI1	TELO2 interacting protein 1
O43157	0.408931	PLXNB1	plexin B1
O43159	0.61881	RRP8	ribosomal RNA processing 8
O43164	0.43338	PJA2	praja ring finger ubiquitin ligase 2
O43166	0.35222	SIPA1L1	signal induced proliferation associated 1 like 1
O43167	0.336461	ZBTB24	zinc finger and BTB domain containing 24
O43169	0.41204	CYB5B	cytochrome b5 type B
O43172	0.609966	PRPF4	pre-mRNA processing factor 4
O43173	0.53838	ST8SIA3	ST8 alpha-N-acetyl-neuraminide alpha-2,8-sialyltransferase 3
O43174	0.30927	CYP26A1	cytochrome P450 family 26 subfamily A member 1
O43175	0.88602	PHGDH	phosphoglycerate dehydrogenase
O43181	0.36381	NDUFS4	NADH:ubiquinone oxidoreductase subunit S4
O43182	0.3841	ARHGAP6	Rho GTPase activating protein 6
O43184	0.352999	ADAM12	ADAM metallopeptidase domain 12
O43186	0.547	CRX	cone-rod homeobox
O43187	0.523107	IRAK2	interleukin 1 receptor associated kinase 2
O43189	0.34128	PHF1	PHD finger protein 1
O43193	0.39738	MLNR	motilin receptor
O43194	0.40511	GPR39	G protein-coupled receptor 39
O43196	0.47011	MSH5	mutS homolog 5
O43236	0.50521	SEPTIN4	septin 4
O43237	0.63359	DYNC1LI2	dynein cytoplasmic 1 light intermediate chain 2
O43240	0.35818	KLK10	kallikrein related peptidase 10
O43242	0.44773	PSMD3	proteasome 26S subunit, non-ATPase 3
O43246	0.72566	SLC7A4	solute carrier family 7 member 4
O43248	0.54433	HOXC11	homeobox C11
O43251	0.62072	RBFOX2	RNA binding fox-1 homolog 2
O43252	0.74609	PAPSS1	3'-phosphoadenosine 5'-phosphosulfate synthase 1
O43255	0.36871	SIAH2	siah E3 ubiquitin protein ligase 2
O43257	0.38249	ZNHIT1	zinc finger HIT-type containing 1
O43264	0.372588	ZW10	zw10 kinetochore protein
O43272	0.4016	PRODH	proline dehydrogenase 1
O43278	0.36975	SPINT1	serine peptidase inhibitor, Kunitz type 1
O43280	0.52467	TREH	trehalase
O43281	0.626556	EFS	embryonal Fyn-associated substrate
O43283	0.593013	MAP3K13	mitogen-activated protein kinase kinase kinase 13
O43286	0.523946	B4GALT5	beta-1,4-galactosyltransferase 5
O43290	0.467162	SART1	spliceosome associated factor 1, recruiter of U4/U6.U5 tri-snRNP
O43291	0.36512	SPINT2	serine peptidase inhibitor, Kunitz type 2
O43292	0.34125	GPAA1	glycosylphosphatidylinositol anchor attachment 1
O43293	0.651452	DAPK3	death associated protein kinase 3
O43294	0.35054	TGFB1I1	transforming growth factor beta 1 induced transcript 1
O43295	0.347447	SRGAP3	SLIT-ROBO Rho GTPase activating protein 3
O43296	0.36583	ZNF264	zinc finger protein 264
O43298	0.402715	ZBTB43	zinc finger and BTB domain containing 43
O43299	0.45269	AP5Z1	adaptor related protein complex 5 subunit zeta 1
O43300	0.42996	LRRTM2	leucine rich repeat transmembrane neuronal 2
O43301	0.42071	HSPA12A	heat shock protein family A (Hsp70) member 12A
O43303	0.61636	CCP110	centriolar coiled-coil protein 110
O43304	0.436946	SEC14L5	SEC14 like lipid binding 5
O43306	0.367194	ADCY6	adenylate cyclase 6
O43307	0.356383	ARHGEF9	Cdc42 guanine nucleotide exchange factor 9
O43309	0.351594	ZSCAN12	zinc finger and SCAN domain containing 12
O43310	0.4617	CTIF	cap binding complex dependent translation initiation factor
O43312	0.43034	MTSS1	MTSS I-BAR domain containing 1
O43313	0.444565	ATMIN	ATM interactor
O43314	0.418846	PPIP5K2	diphosphoinositol pentakisphosphate kinase 2
O43315	0.53119	AQP9	aquaporin 9
O43316	0.580134	PAX4	paired box 4
O43318	0.600507	MAP3K7	mitogen-activated protein kinase kinase kinase 7
O43320	0.34912	FGF16	fibroblast growth factor 16
O43323	0.538483	DHH	desert hedgehog signaling molecule
O43324	0.39302	EEF1E1	eukaryotic translation elongation factor 1 epsilon 1
O43325	0.50183	LYRM1	LYR motif containing 1
O43345	0.414103	ZNF208	zinc finger protein 208
O43347	0.561912	MSI1	musashi RNA binding protein 1
O43353	0.560725	RIPK2	receptor interacting serine/threonine kinase 2
O43361	0.423668	ZNF749	zinc finger protein 749
O43364	0.53818	HOXA2	homeobox A2
O43365	0.53134	HOXA3	homeobox A3
O43374	0.3433	RASA4	RAS p21 protein activator 4
O43379	0.369062	WDR62	WD repeat domain 62
O43390	0.484129	HNRNPR	heterogeneous nuclear ribonucleoprotein R
O43395	0.488293	PRPF3	pre-mRNA processing factor 3
O43396	0.506662	TXNL1	thioredoxin like 1
O43402	0.39573	EMC8	ER membrane protein complex subunit 8
O43405	0.59836	COCH	cochlin
O43414	0.59128	ERI3	ERI1 exoribonuclease family member 3
O43422	0.323995	THAP12	THAP domain containing 12
O43423	0.43599	ANP32C	Acidic leucine-rich nuclear phosphoprotein 32 family member C (Phosphoprotein 32-related protein 1) (Tumorigenic protein pp32r1)
O43424	0.602789	GRID2	glutamate ionotropic receptor delta type subunit 2
O43426	0.26511	SYNJ1	synaptojanin 1
O43427	0.36171	FIBP	FGF1 intracellular binding protein
O43432	0.471149	EIF4G3	eukaryotic translation initiation factor 4 gamma 3
O43435	0.4203	TBX1	T-box transcription factor 1
O43439	0.703946	CBFA2T2	CBFA2/RUNX1 partner transcriptional co-repressor 2
O43447	0.35085	PPIH	peptidylprolyl isomerase H
O43448	0.57253	KCNAB3	potassium voltage-gated channel subfamily A regulatory beta subunit 3
O43451	0.309728	MGAM	maltase-glucoamylase
O43462	0.58297	MBTPS2	membrane bound transcription factor peptidase, site 2
O43463	0.47717	SUV39H1	SUV39H1 histone lysine methyltransferase
O43464	0.36183	HTRA2	HtrA serine peptidase 2
O43474	0.31851	KLF4	KLF transcription factor 4
O43482	0.37352	OIP5	Opa interacting protein 5
O43488	0.5718	AKR7A2	aldo-keto reductase family 7 member A2
O43490	0.37377	PROM1	prominin 1
O43491	0.356887	EPB41L2	erythrocyte membrane protein band 4.1 like 2
O43497	0.23604	CACNA1G	calcium voltage-gated channel subunit alpha1 G
O43502	0.690391	RAD51C	RAD51 paralog C
O43504	0.67951	LAMTOR5	late endosomal/lysosomal adaptor, MAPK and MTOR activator 5
O43505	0.503635	B4GAT1	beta-1,4-glucuronyltransferase 1
O43506	0.348243	ADAM20	ADAM metallopeptidase domain 20
O43508	0.48936	TNFSF12	TNF superfamily member 12
O43511	0.72031	SLC26A4	solute carrier family 26 member 4
O43513	0.457346	MED7	mediator complex subunit 7
O43520	0.639346	ATP8B1	ATPase phospholipid transporting 8B1
O43524	0.57158	FOXO3	forkhead box O3
O43525	0.49358	KCNQ3	potassium voltage-gated channel subfamily Q member 3
O43526	0.493244	KCNQ2	potassium voltage-gated channel subfamily Q member 2
O43529	0.38991	CHST10	carbohydrate sulfotransferase 10
O43541	0.33417	SMAD6	SMAD family member 6
O43542	0.728298	XRCC3	X-ray repair cross complementing 3
O43543	0.73038	XRCC2	X-ray repair cross complementing 2
O43548	0.30002	TGM5	transglutaminase 5
O43556	0.40735	SGCE	sarcoglycan epsilon
O43557	0.52734	TNFSF14	TNF superfamily member 14
O43559	0.57297	FRS3	fibroblast growth factor receptor substrate 3
O43566	0.394614	RGS14	regulator of G protein signaling 14
O43567	0.504075	RNF13	ring finger protein 13
O43570	0.32827	CA12	carbonic anhydrase 12
O43572	0.35742	AKAP10	A-kinase anchoring protein 10
O43581	0.524746	SYT7	synaptotagmin 7
O43583	0.72541	DENR	density regulated re-initiation and release factor
O43586	0.47307	PSTPIP1	proline-serine-threonine phosphatase interacting protein 1
O43592	0.37018	XPOT	exportin for tRNA
O43593	0.290665	HR	HR lysine demethylase and nuclear receptor corepressor
O43597	0.41465	SPRY2	sprouty RTK signaling antagonist 2
O43598	0.61838	DNPH1	2'-deoxynucleoside 5'-phosphate N-hydrolase 1
O43602	0.447818	DCX	doublecortin
O43603	0.39045	GALR2	galanin receptor 2
O43609	0.42253	SPRY1	sprouty RTK signaling antagonist 1
O43610	0.39472	SPRY3	sprouty RTK signaling antagonist 3
O43613	0.39869	HCRTR1	hypocretin receptor 1
O43614	0.39985	HCRTR2	hypocretin receptor 2
O43615	0.449806	TIMM44	translocase of inner mitochondrial membrane 44
O43617	0.68353	TRAPPC3	trafficking protein particle complex subunit 3
O43623	0.30811	SNAI2	snail family transcriptional repressor 2
O43633	0.63944	CHMP2A	charged multivesicular body protein 2A
O43638	0.55388	FOXS1	forkhead box S1
O43639	0.551249	NCK2	NCK adaptor protein 2
O43653	0.44656	PSCA	prostate stem cell antigen
O43657	0.45962	TSPAN6	tetraspanin 6
O43660	0.69955	PLRG1	pleiotropic regulator 1
O43663	0.54518	PRC1	protein regulator of cytokinesis 1
O43665	0.45411	RGS10	regulator of G protein signaling 10
O43670	0.40869	ZNF207	zinc finger protein 207
O43674	0.38775	NDUFB5	NADH:ubiquinone oxidoreductase subunit B5
O43676	0.46932	NDUFB3	NADH:ubiquinone oxidoreductase subunit B3
O43677	0.66194	NDUFC1	NADH:ubiquinone oxidoreductase subunit C1
O43678	0.51723	NDUFA2	NADH:ubiquinone oxidoreductase subunit A2
O43679	0.35961	LDB2	LIM domain binding 2
O43680	0.56918	TCF21	transcription factor 21
O43681	0.77249	GET3	guided entry of tail-anchored proteins factor 3, ATPase
O43683	0.547459	BUB1	BUB1 mitotic checkpoint serine/threonine kinase
O43684	0.7024	BUB3	BUB3 mitotic checkpoint protein
O43688	0.53809	PLPP2	phospholipid phosphatase 2
O43692	0.3557	PI15	peptidase inhibitor 15
O43699	0.38803	SIGLEC6	sialic acid binding Ig like lectin 6
O43704	0.40873	SULT1B1	sulfotransferase family 1B member 1
O43707	0.42641	ACTN4	actinin alpha 4
O43708	0.42265	GSTZ1	glutathione S-transferase zeta 1
O43709	0.68751	BUD23	BUD23 rRNA methyltransferase and ribosome maturation factor
O43711	0.54057	TLX3	T cell leukemia homeobox 3
O43715	0.48501	TRIAP1	TP53 regulated inhibitor of apoptosis 1
O43716	0.36632	GATC	glutamyl-tRNA amidotransferase subunit C
O43719	0.521121	HTATSF1	HIV-1 Tat specific factor 1
O43731	0.45658	KDELR3	KDEL endoplasmic reticulum protein retention receptor 3
O43734	0.58589	TRAF3IP2	TRAF3 interacting protein 2
O43736	0.39326	ITM2A	integral membrane protein 2A
O43739	0.48189	CYTH3	cytohesin 3
O43741	0.450408	PRKAB2	protein kinase AMP-activated non-catalytic subunit beta 2
O43745	0.36014	CHP2	calcineurin like EF-hand protein 2
O43747	0.523873	AP1G1	adaptor related protein complex 1 subunit gamma 1
O43749	0.39385	OR1F1	olfactory receptor family 1 subfamily F member 1
O43752	0.739397	STX6	syntaxin 6
O43759	0.5558	SYNGR1	synaptogyrin 1
O43760	0.53403	SYNGR2	synaptogyrin 2
O43761	0.54548	SYNGR3	synaptogyrin 3
O43763	0.54072	TLX2	T cell leukemia homeobox 2
O43765	0.579012	SGTA	small glutamine rich tetratricopeptide repeat co-chaperone alpha
O43766	0.60704	LIAS	lipoic acid synthetase
O43772	0.4641	SLC25A20	solute carrier family 25 member 20
O43776	0.801226	NARS1	asparaginyl-tRNA synthetase 1
O43781	0.45403	DYRK3	dual specificity tyrosine phosphorylation regulated kinase 3
O43790	0.742954	KRT86	keratin 86
O43791	0.463267	SPOP	speckle type BTB/POZ protein
O43795	0.360771	MYO1B	myosin IB
O43805	0.74002	SSNA1	SS nuclear autoantigen 1
O43808	0.41618	SLC25A17	solute carrier family 25 member 17
O43809	0.52181	NUDT21	nudix hydrolase 21
O43812	0.533526	DUX1	double homeobox 1
O43813	0.42433	LANCL1	LanC like glutathione S-transferase 1
O43815	0.713387	STRN	striatin
O43818	0.68488	RRP9	ribosomal RNA processing 9, U3 small nucleolar RNA binding protein
O43819	0.55216	SCO2	synthesis of cytochrome C oxidase 2
O43820	0.4852	HYAL3	hyaluronidase 3
O43822	0.42854	CFAP410	cilia and flagella associated protein 410
O43823	0.36165	AKAP8	A-kinase anchoring protein 8
O43824	0.36279	GTPBP6	GTP binding protein 6 (putative)
O43825	0.5256	B3GALT2	beta-1,3-galactosyltransferase 2
O43826	0.8681	SLC37A4	solute carrier family 37 member 4
O43827	0.483966	ANGPTL7	angiopoietin like 7
O43829	0.32626	ZBTB14	zinc finger and BTB domain containing 14
O43837	0.92499	IDH3B	isocitrate dehydrogenase (NAD(+)) 3 non-catalytic subunit beta
O43847	0.25063	NRDC	nardilysin convertase
O43852	0.34465	CALU	calumenin
O43854	0.341734	EDIL3	EGF like repeats and discoidin domains 3
O43861	0.665113	ATP9B	ATPase phospholipid transporting 9B (putative)
O43865	0.89587	AHCYL1	adenosylhomocysteinase like 1
O43866	0.373925	CD5L	CD5 molecule like
O43868	0.543278	SLC28A2	solute carrier family 28 member 2
O43869	0.39878	OR2T1	olfactory receptor family 2 subfamily T member 1
O43889	0.70221	CREB3	cAMP responsive element binding protein 3
O43895	0.49632	XPNPEP2	X-prolyl aminopeptidase 2
O43896	0.408572	KIF1C	kinesin family member 1C
O43897	0.430718	TLL1	tolloid like 1
O43900	0.38228	PRICKLE3	prickle planar cell polarity protein 3
O43903	0.35593	GAS2	growth arrest specific 2
O43909	0.500456	EXTL3	exostosin like glycosyltransferase 3
O43913	0.613452	ORC5	origin recognition complex subunit 5
O43915	0.351839	VEGFD	vascular endothelial growth factor D
O43916	0.41277	CHST1	carbohydrate sulfotransferase 1
O43918	0.486664	AIRE	autoimmune regulator
O43920	0.37076	NDUFS5	NADH:ubiquinone oxidoreductase subunit S5
O43921	0.45582	EFNA2	ephrin A2
O43924	0.54203	PDE6D	phosphodiesterase 6D
O43927	0.45041	CXCL13	C-X-C motif chemokine ligand 13
O43929	0.638885	ORC4	origin recognition complex subunit 4
O43930	0.59646	PRKY	protein kinase Y-linked (pseudogene)
O43933	0.802384	PEX1	peroxisomal biogenesis factor 1
O43934	0.76897	MFSD11	major facilitator superfamily domain containing 11
O60216	0.524963	RAD21	RAD21 cohesin complex component
O60218	0.5679	AKR1B10	aldo-keto reductase family 1 member B10
O60220	0.51669	TIMM8A	translocase of inner mitochondrial membrane 8A
O60224	0.475	SSX4	SSX family member 4
O60225	0.50457	SSX5	SSX family member 5
O60231	0.549839	DHX16	DEAH-box helicase 16
O60232	0.69812	ZNRD2	zinc ribbon domain containing 2
O60234	0.38956	GMFG	glia maturation factor gamma
O60235	0.34362	TMPRSS11D	transmembrane serine protease 11D
O60237	0.503519	PPP1R12B	protein phosphatase 1 regulatory subunit 12B
O60239	0.43789	SH3BP5	SH3 domain binding protein 5
O60240	0.590289	PLIN1	perilipin 1
O60241	0.404525	ADGRB2	adhesion G protein-coupled receptor B2
O60242	0.394886	ADGRB3	adhesion G protein-coupled receptor B3
O60243	0.35849	HS6ST1	heparan sulfate 6-O-sulfotransferase 1
O60244	0.34401	MED14	mediator complex subunit 14
O60245	0.55711	PCDH7	protocadherin 7
O60248	0.44031	SOX15	SRY-box transcription factor 15
O60256	0.82299	PRPSAP2	phosphoribosyl pyrophosphate synthetase associated protein 2
O60258	0.34598	FGF17	fibroblast growth factor 17
O60259	0.33524	KLK8	kallikrein related peptidase 8
O60260	0.352265	PRKN	parkin RBR E3 ubiquitin protein ligase
O60262	0.52892	GNG7	G protein subunit gamma 7
O60264	0.536321	SMARCA5	SWI/SNF related, matrix associated, actin dependent regulator of chromatin, subfamily a, member 5
O60266	0.366172	ADCY3	adenylate cyclase 3
O60268	0.41993	KIAA0513	KIAA0513
O60271	0.60115	SPAG9	sperm associated antigen 9
O60279	0.378132	SUSD5	sushi domain containing 5
O60282	0.588988	KIF5C	kinesin family member 5C
O60284	0.604269	ST18	ST18 C2H2C-type zinc finger transcription factor
O60285	0.58305	NUAK1	NUAK family kinase 1
O60287	0.399989	URB1	URB1 ribosome biogenesis homolog
O60290	0.354045	ZNF862	zinc finger protein 862
O60291	0.32045	MGRN1	mahogunin ring finger 1
O60292	0.357327	SIPA1L3	signal induced proliferation associated 1 like 3
O60293	0.609783	ZFC3H1	zinc finger C3H1-type containing
O60294	0.32083	LCMT2	leucine carboxyl methyltransferase 2
O60296	0.726191	TRAK2	trafficking kinesin protein 2
O60299	0.737206	LZTS3	leucine zipper tumor suppressor family member 3
O60303	0.374269	KATNIP	katanin interacting protein
O60304	0.343091	ZNF500	zinc finger protein 500
O60306	0.47197	AQR	aquarius intron-binding spliceosomal factor
O60307	0.504734	MAST3	microtubule associated serine/threonine kinase 3
O60308	0.475491	CEP104	centrosomal protein 104
O60309	0.45539	LRRC37A3	leucine rich repeat containing 37 member A3
O60312	0.657389	ATP10A	ATPase phospholipid transporting 10A (putative)
O60313	0.4664	OPA1	OPA1 mitochondrial dynamin like GTPase
O60315	0.476254	ZEB2	zinc finger E-box binding homeobox 2
O60318	0.38095	MCM3AP	minichromosome maintenance complex component 3 associated protein
O60320	0.5518	ENTREP2	endosomal transmembrane epsin interactor 2
O60330	0.512377	PCDHGA12	protocadherin gamma subfamily A, 12
O60331	0.41083	PIP5K1C	phosphatidylinositol-4-phosphate 5-kinase type 1 gamma
O60333	0.375982	KIF1B	kinesin family member 1B
O60336	0.378469	MAPKBP1	mitogen-activated protein kinase binding protein 1
O60337	0.38951	MARCHF6	membrane associated ring-CH-type finger 6
O60341	0.54336	KDM1A	lysine demethylase 1A
O60343	0.427491	TBC1D4	TBC1 domain family member 4
O60346	0.262569	PHLPP1	PH domain and leucine rich repeat protein phosphatase 1
O60347	0.32453	TBC1D12	TBC1 domain family member 12
O60353	0.394042	FZD6	frizzled class receptor 6
O60359	0.58497	CACNG3	calcium voltage-gated channel auxiliary subunit gamma 3
O60361	0.89513	NME2P1	NME2 pseudogene 1
O60381	0.433731	HBP1	HMG-box transcription factor 1
O60383	0.33592	GDF9	growth differentiation factor 9
O60391	0.54036	GRIN3B	glutamate ionotropic receptor NMDA type subunit 3B
O60393	0.50701	NOBOX	NOBOX oogenesis homeobox
O60403	0.38726	OR10H2	olfactory receptor family 10 subfamily H member 2
O60404	0.38207	OR10H3	olfactory receptor family 10 subfamily H member 3
O60412	0.40126	OR7C2	olfactory receptor family 7 subfamily C member 2
O60422	0.3661	ONECUT3	one cut homeobox 3
O60423	0.639568	ATP8B3	ATPase phospholipid transporting 8B3
O60427	0.32809	FADS1	fatty acid desaturase 1
O60431	0.40968	OR1I1	olfactory receptor family 1 subfamily I member 1
O60437	0.495512	PPL	periplakin
O60443	0.356305	GSDME	gasdermin E
O60447	0.442747	EVI5	ecotropic viral integration site 5
O60449	0.348434	LY75	lymphocyte antigen 75
O60462	0.526737	NRP2	neuropilin 2
O60469	0.5419	DSCAM	DS cell adhesion molecule
O60476	0.46826	MAN1A2	mannosidase alpha class 1A member 2
O60477	0.389708	BRINP1	BMP/retinoic acid inducible neural specific 1
O60478	0.4467	GPR137B	G protein-coupled receptor 137B
O60479	0.53762	DLX3	distal-less homeobox 3
O60481	0.32995	ZIC3	Zic family member 3
O60486	0.484725	PLXNC1	plexin C1
O60487	0.678337	MPZL2	myelin protein zero like 2
O60488	0.381404	ACSL4	acyl-CoA synthetase long chain family member 4
O60493	0.47436	SNX3	sorting nexin 3
O60496	0.574073	DOK2	docking protein 2
O60499	0.67001	STX10	syntaxin 10
O60500	0.562303	NPHS1	NPHS1 adhesion molecule, nephrin
O60502	0.64464	OGA	O-GlcNAcase
O60503	0.345488	ADCY9	adenylate cyclase 9
O60504	0.608956	SORBS3	sorbin and SH3 domain containing 3
O60506	0.487071	SYNCRIP	synaptotagmin binding cytoplasmic RNA interacting protein
O60507	0.40867	TPST1	tyrosylprotein sulfotransferase 1
O60508	0.575869	CDC40	cell division cycle 40
O60512	0.46698	B4GALT3	beta-1,4-galactosyltransferase 3
O60513	0.51028	B4GALT4	beta-1,4-galactosyltransferase 4
O60516	0.33197	EIF4EBP3	eukaryotic translation initiation factor 4E binding protein 3
O60518	0.499425	RANBP6	RAN binding protein 6
O60519	0.77824	CREBL2	cAMP responsive element binding protein like 2
O60522	0.390989	TDRD6	tudor domain containing 6
O60524	0.760908	NEMF	nuclear export mediator factor
O60542	0.34372	PSPN	persephin
O60543	0.45073	CIDEA	cell death inducing DFFA like effector a
O60547	0.84882	GMDS	GDP-mannose 4,6-dehydratase
O60548	0.55448	FOXD2	forkhead box D2
O60551	0.3295	NMT2	N-myristoyltransferase 2
O60563	0.36458	CCNT1	cyclin T1
O60565	0.37148	GREM1	gremlin 1, DAN family BMP antagonist
O60566	0.521106	BUB1B	BUB1 mitotic checkpoint serine/threonine kinase B
O60568	0.56404	PLOD3	procollagen-lysine,2-oxoglutarate 5-dioxygenase 3
O60573	0.40602	EIF4E2	eukaryotic translation initiation factor 4E family member 2
O60575	0.43499	SPINK4	serine peptidase inhibitor Kazal type 4
O60583	0.36661	CCNT2	cyclin T2
O60602	0.465639	TLR5	toll like receptor 5
O60603	0.479324	TLR2	toll like receptor 2
O60609	0.33239	GFRA3	GDNF family receptor alpha 3
O60610	0.60625	DIAPH1	diaphanous related formin 1
O60635	0.39656	TSPAN1	tetraspanin 1
O60636	0.47374	TSPAN2	tetraspanin 2
O60637	0.44671	TSPAN3	tetraspanin 3
O60641	0.43192	SNAP91	synaptosome associated protein 91
O60645	0.396241	EXOC3	exocyst complex component 3
O60656	0.58135	UGT1A9	UDP glucuronosyltransferase family 1 member A9
O60658	0.444483	PDE8A	phosphodiesterase 8A
O60662	0.3373	KLHL41	kelch like family member 41
O60663	0.42452	LMX1B	LIM homeobox transcription factor 1 beta
O60664	0.480432	PLIN3	perilipin 3
O60667	0.641124	FCMR	Fc mu receptor
O60669	0.82832	SLC16A7	solute carrier family 16 member 7
O60671	0.79548	RAD1	RAD1 checkpoint DNA exonuclease
O60674	0.580472	JAK2	Janus kinase 2
O60675	0.69925	MAFK	MAF bZIP transcription factor K
O60676	0.38438	CST8	cystatin 8
O60678	0.65853	PRMT3	protein arginine methyltransferase 3
O60682	0.571	MSC	musculin
O60683	0.412471	PEX10	peroxisomal biogenesis factor 10
O60684	0.51511	KPNA6	karyopherin subunit alpha 6
O60687	0.36022	SRPX2	sushi repeat containing protein X-linked 2
O60688	0.39734	YPEL1	yippee like 1
O60701	0.85911	UGDH	UDP-glucose 6-dehydrogenase
O60704	0.4061	TPST2	tyrosylprotein sulfotransferase 2
O60706	0.24837	ABCC9	ATP binding cassette subfamily C member 9
O60711	0.34522	LPXN	leupaxin
O60716	0.46849	CTNND1	catenin delta 1
O60721	0.59387	SLC24A1	solute carrier family 24 member 1
O60725	0.39233	ICMT	isoprenylcysteine carboxyl methyltransferase
O60729	0.38133	CDC14B	cell division cycle 14B
O60732	0.362185	MAGEC1	MAGE family member C1
O60733	0.31023	PLA2G6	phospholipase A2 group VI
O60739	0.81464	EIF1B	eukaryotic translation initiation factor 1B
O60741	0.465856	HCN1	hyperpolarization activated cyclic nucleotide gated potassium channel 1
O60749	0.35196	SNX2	sorting nexin 2
O60755	0.38801	GALR3	galanin receptor 3
O60759	0.42558	CYTIP	cytohesin 1 interacting protein
O60760	0.39878	HPGDS	hematopoietic prostaglandin D synthase
O60762	0.79746	DPM1	dolichyl-phosphate mannosyltransferase subunit 1, catalytic
O60763	0.514327	USO1	USO1 vesicle transport factor
O60765	0.353836	ZNF354A	zinc finger protein 354A
O60774	0.48408	FMO6P	flavin containing dimethylaniline monoxygenase 6, pseudogene
O60779	0.79602	SLC19A2	solute carrier family 19 member 2
O60783	0.39769	MRPS14	mitochondrial ribosomal protein S14
O60784	0.558262	TOM1	target of myb1 membrane trafficking protein
O60806	0.41857	TBX19	T-box transcription factor 19
O60809	0.43634	PRAMEF10	PRAME family member 10
O60810	0.42356	PRAMEF4	PRAME family member 4
O60811	0.43346	PRAMEF2	PRAME family member 2
O60812	0.56953	HNRNPCL1	heterogeneous nuclear ribonucleoprotein C like 1
O60813	0.42736	PRAMEF11	PRAME family member 11
O60814	0.62234	H2BC12	H2B clustered histone 12
O60825	0.36874	PFKFB2	6-phosphofructo-2-kinase/fructose-2,6-biphosphatase 2
O60826	0.614088	CCDC22	coiled-coil domain containing 22
O60828	0.37562	PQBP1	polyglutamine binding protein 1
O60830	0.48161	TIMM17B	translocase of inner mitochondrial membrane 17B
O60831	0.44208	PRAF2	PRA1 domain family member 2
O60832	0.91407	DKC1	dyskerin pseudouridine synthase 1
O60840	0.278962	CACNA1F	calcium voltage-gated channel subunit alpha1 F
O60841	0.660112	EIF5B	eukaryotic translation initiation factor 5B
O60844	0.37	ZG16	zymogen granule protein 16
O60858	0.398538	TRIM13	tripartite motif containing 13
O60861	0.450045	GAS7	growth arrest specific 7
O60869	0.4742	EDF1	endothelial differentiation related factor 1
O60870	0.521859	KIN	Kin17 DNA and RNA binding protein
O60879	0.78496	DIAPH2	diaphanous related formin 2
O60880	0.44865	SH2D1A	SH2 domain containing 1A
O60882	0.441784	MMP20	matrix metallopeptidase 20
O60883	0.39291	GPR37L1	G protein-coupled receptor 37 like 1
O60884	0.380949	DNAJA2	DnaJ heat shock protein family (Hsp40) member A2
[truncated: 16,234 more rows]

## Sheet: Hsapiens_to_Lokiarchaeum_GC1475
UniProt ID	Structural Conservative Scores	Gene Symbol	Gene Full Name
A0A024RBG1	0.70967	NUDT4B	nudix hydrolase 4B
A0A075B6H5	0.54301	TRBV20OR9-2	T cell receptor beta variable 20/OR9-2 (non-functional)
A0A075B6H7	0.57695	IGKV3-7	immunoglobulin kappa variable 3-7 (non-functional)
A0A075B6H8	0.57456	IGKV1D-42	immunoglobulin kappa variable 1D-42 (non-functional)
A0A075B6H9	0.54618	IGLV4-69	immunoglobulin lambda variable 4-69
A0A075B6I0	0.52331	IGLV8-61	immunoglobulin lambda variable 8-61
A0A075B6I1	0.56305	IGLV4-60	immunoglobulin lambda variable 4-60
A0A075B6I3	0.53721	IGLV11-55	immunoglobulin lambda variable 11-55 (non-functional)
A0A075B6I4	0.54989	IGLV10-54	immunoglobulin lambda variable 10-54
A0A075B6I6	0.54821	IGLV1-50	immunoglobulin lambda variable 1-50 (non-functional)
A0A075B6I7	0.4646	IGLV5-48	immunoglobulin lambda variable 5-48 (non-functional)
A0A075B6I9	0.53812	IGLV7-46	immunoglobulin lambda variable 7-46
A0A075B6J1	0.54604	IGLV5-37	immunoglobulin lambda variable 5-37
A0A075B6J2	0.55112	IGLV2-33	immunoglobulin lambda variable 2-33 (non-functional)
A0A075B6J6	0.57611	IGLV3-22	immunoglobulin lambda variable 3-22
A0A075B6J9	0.55819	IGLV2-18	immunoglobulin lambda variable 2-18
A0A075B6K0	0.57595	IGLV3-16	immunoglobulin lambda variable 3-16
A0A075B6K2	0.54284	IGLV3-12	immunoglobulin lambda variable 3-12
A0A075B6K4	0.56907	IGLV3-10	immunoglobulin lambda variable 3-10
A0A075B6K5	0.54784	IGLV3-9	immunoglobulin lambda variable 3-9
A0A075B6K6	0.55248	IGLV4-3	immunoglobulin lambda variable 4-3
A0A075B6L2	0.56194	TRGV11	T cell receptor gamma variable 11 (non-functional)
A0A075B6L6	0.55668	TRBV7-3	T cell receptor beta variable 7-3
A0A075B6N1	0.55699	TRBV19	T cell receptor beta variable 19
A0A075B6N2	0.54019	TRBV20-1	T cell receptor beta variable 20-1
A0A075B6N3	0.53595	TRBV24-1	T cell receptor beta variable 24-1
A0A075B6N4	0.53632	TRBV25-1	T cell receptor beta variable 25-1
A0A075B6P5	0.56791	IGKV2-28	immunoglobulin kappa variable 2-28
A0A075B6Q5	0.54137	IGHV3-64	immunoglobulin heavy variable 3-64
A0A075B6R0	0.51502	TRGV2	T cell receptor gamma variable 2
A0A075B6R2	0.55139	IGHV4-4	immunoglobulin heavy variable 4-4
A0A075B6R9	0.55987	IGKV2D-24	immunoglobulin kappa variable 2D-24 (non-functional)
A0A075B6S2	0.56401	IGKV2D-29	immunoglobulin kappa variable 2D-29
A0A075B6S4	0.58473	IGKV1D-17	immunoglobulin kappa variable 1D-17
A0A075B6S5	0.5813	IGKV1-27	immunoglobulin kappa variable 1-27
A0A075B6S6	0.56443	IGKV2D-30	immunoglobulin kappa variable 2D-30
A0A075B6S9	0.57623	IGKV1-37	immunoglobulin kappa variable 1-37 (non-functional)
A0A075B6T6	0.55882	TRAV12-2	T cell receptor alpha variable 12-2
A0A075B6T7	0.55909	TRAV6	T cell receptor alpha variable 6
A0A075B6T8	0.53393	TRAV9-1	T cell receptor alpha variable 9-1
A0A075B6U4	0.56793	TRAV7	T cell receptor alpha variable 7
A0A075B6U6	0.55442	TRAV8-7	T cell receptor alpha variable 8-7 (pseudogene)
A0A075B6V5	0.56876	TRAV36DV7	T cell receptor alpha variable 36/delta variable 7
A0A075B6W5	0.54982	TRAV23DV6	T cell receptor alpha variable 23/delta variable 6
A0A075B6X5	0.54522	TRAV18	T cell receptor alpha variable 18
A0A075B734	0.44409	AQP7B	aquaporin 7B
A0A075B759	0.81472	PPIAL4E	peptidylprolyl isomerase A like 4E
A0A075B767	0.81251	PPIAL4H	peptidylprolyl isomerase A like 4H
A0A075B7B6	0.55225	IGHV4OR15-8	immunoglobulin heavy variable 4/OR15-8 (non-functional)
A0A075B7B8	0.50029	IGHV3OR16-12	immunoglobulin heavy variable 3/OR16-12 (non-functional)
A0A075B7D0	0.54671	IGHV1OR15-1	immunoglobulin heavy variable 1/OR15-1 (non-functional)
A0A075B7D4	0.57505	IGKV1OR2-108	immunoglobulin kappa variable 1/OR2-108 (non-functional)
A0A075B7D8	0.53845	IGHV3OR15-7	immunoglobulin heavy variable 3/OR15-7 (pseudogene)
A0A075B7E8	0.54121	IGHV3OR16-13	immunoglobulin heavy variable 3/OR16-13 (non-functional)
A0A075B7F0	0.54255	IGHV3OR16-10	immunoglobulin heavy variable 3/OR16-10 (non-functional)
A0A075B7F1	0.53693	IGHV3OR16-8	immunoglobulin heavy variable 3/OR16-8 (non-functional)
A0A087WSX0	0.55337	IGLV5-45	immunoglobulin lambda variable 5-45
A0A087WSY4	0.55061	IGHV4-30-2	immunoglobulin heavy variable 4-30-2
A0A087WSY6	0.5858	IGKV3D-15	immunoglobulin kappa variable 3D-15
A0A087WSZ0	0.58312	IGKV1D-8	immunoglobulin kappa variable 1D-8
A0A087WSZ9	0.55648	TRAV30	T cell receptor alpha variable 30
A0A087WT01	0.54149	TRAV27	T cell receptor alpha variable 27
A0A087WT02	0.53465	TRAV9-2	T cell receptor alpha variable 9-2
A0A087WT03	0.54457	TRAV26-1	T cell receptor alpha variable 26-1
A0A087WUV0	0.351261	LOC344065	Zinc finger protein 2
A0A087WV53	0.52474	SPEGNB	SPEG neighbor
A0A087WV62	0.54201	TRBV16	T cell receptor beta variable 16
A0A087WVF3	0.3697	TBC1D3D	TBC1 domain family member 3D
A0A087WW49	0.55104		Ig-like domain-containing protein
A0A087WW87	0.56564	IGKV2-40	immunoglobulin kappa variable 2-40
A0A087WX78	0.42128
A0A087WXS9	0.37369	TBC1D3I	TBC1 domain family member 3I
A0A087WYE8	0.55319	IGHV1OR21-1	immunoglobulin heavy variable 1/OR21-1 (non-functional)
A0A087WZ39	0.55254	TRBV15	T cell receptor beta variable 15
A0A087X0K7	0.55181	TRBV17	T cell receptor beta variable 17 (non-functional)
A0A087X0M5	0.53807	TRBV18	T cell receptor beta variable 18
A0A087X179	0.37239	TBC1D3E	TBC1 domain family member 3E
A0A087X1C5	0.31481	CYP2D7	cytochrome P450 family 2 subfamily D member 7 (gene/pseudogene)
A0A087X1G2	0.37251	TBC1D3K	TBC1 domain family member 3K
A0A087X1L8	0.60166	LOC102723996	Ig-like domain-containing protein
A0A096LNW5	0.320622	NOTCH2NLR	notch 2 N-terminal like R
A0A096LP49	0.92909	CCDC187	coiled-coil domain containing 187
A0A096LP55	0.6086	UQCRHL	ubiquinol-cytochrome c reductase hinge protein like
A0A096LPH7	0.58226		TRAPPC10 domain-containing protein
A0A096LPK6	0.44939		Exostosin domain-containing protein
A0A096LPK9	0.58161	OR4N4C	olfactory receptor family 4 subfamily N member 4C
A0A0A0MRZ7	0.57291	IGKV2D-26	immunoglobulin kappa variable 2D-26
A0A0A0MRZ8	0.57833	IGKV3D-11	immunoglobulin kappa variable 3D-11
A0A0A0MRZ9	0.54912	IGLV5-52	immunoglobulin lambda variable 5-52
A0A0A0MS00	0.53461	IGLV3-32	immunoglobulin lambda variable 3-32 (non-functional)
A0A0A0MS01	0.54578	TRGV10	T cell receptor gamma variable 10 (non-functional)
A0A0A0MS02	0.5062	TRGV1	T cell receptor gamma variable 1 (non-functional)
A0A0A0MS03	0.55353	TRBV5-3	T cell receptor beta variable 5-3 (non-functional)
A0A0A0MS04	0.55207	TRBV6-7	T cell receptor beta variable 6-7 (non-functional)
A0A0A0MS05	0.54638	TRBV5-7	T cell receptor beta variable 5-7 (non-functional)
A0A0A0MS06	0.54438	TRBV23-1	T cell receptor beta variable 23-1 (non-functional)
A0A0A0MS14	0.54839	IGHV1-45	immunoglobulin heavy variable 1-45
A0A0A0MS15	0.54172	IGHV3-49	immunoglobulin heavy variable 3-49
A0A0A0MT36	0.59031	IGKV6D-21	immunoglobulin kappa variable 6D-21 (non-functional)
A0A0A6YYC5	0.55271	TRAV14DV4	T cell receptor alpha variable 14/delta variable 4
A0A0A6YYD4	0.54814	TRBV13	T cell receptor beta variable 13
A0A0A6YYG2	0.55411	TRBV6-6	T cell receptor beta variable 6-6
A0A0A6YYG3	0.55241	TRBV6-8	T cell receptor beta variable 6-8
A0A0A6YYJ7	0.53445	TRAV8-3	T cell receptor alpha variable 8-3
A0A0A6YYK1	0.53625	TRAV8-1	T cell receptor alpha variable 8-1
A0A0A6YYK4	0.52359	TRBV7-1	T cell receptor beta variable 7-1 (non-functional)
A0A0A6YYK6	0.53928	TRAV16	T cell receptor alpha variable 16
A0A0A6YYK7	0.53558	TRAV19	T cell receptor alpha variable 19
A0A0A6YYL3	0.615152	POTEB	POTE ankyrin domain family member B
A0A0B4J1T7	0.41831	LY6G6E	lymphocyte antigen 6 family member G6E (pseudogene)
A0A0B4J1U3	0.55235	IGLV1-36	immunoglobulin lambda variable 1-36
A0A0B4J1U4	0.50887	TRGV5	T cell receptor gamma variable 5
A0A0B4J1U6	0.5424	TRBV9	T cell receptor beta variable 9
A0A0B4J1U7	0.54543	IGHV6-1	immunoglobulin heavy variable 6-1
A0A0B4J1V0	0.54369	IGHV3-15	immunoglobulin heavy variable 3-15
A0A0B4J1V1	0.54211	IGHV3-21	immunoglobulin heavy variable 3-21
A0A0B4J1V2	0.55679	IGHV2-26	immunoglobulin heavy variable 2-26
A0A0B4J1V6	0.53954	IGHV3-73	immunoglobulin heavy variable 3-73
A0A0B4J1V7	0.53534	IGHV7-81	immunoglobulin heavy variable 7-81 (non-functional)
A0A0B4J1W7	0.89656	NPIPA9	nuclear pore complex interacting protein family, member A9
A0A0B4J1X5	0.54556	IGHV3-74	immunoglobulin heavy variable 3-74
A0A0B4J1X8	0.54901	IGHV3-43	immunoglobulin heavy variable 3-43
A0A0B4J1Y8	0.54219	IGLV9-49	immunoglobulin lambda variable 9-49
A0A0B4J1Y9	0.54028	IGHV3-72	immunoglobulin heavy variable 3-72
A0A0B4J1Z2	0.58059	IGKV1D-43	immunoglobulin kappa variable 1D-43
A0A0B4J234	0.56971	TRAV2	T cell receptor alpha variable 2
A0A0B4J235	0.50963	TRAV13-2	T cell receptor alpha variable 13-2
A0A0B4J237	0.53068	TRAV8-2	T cell receptor alpha variable 8-2
A0A0B4J238	0.55007	TRAV1-2	T cell receptor alpha variable 1-2
A0A0B4J240	0.56974	TRAV10	T cell receptor alpha variable 10
A0A0B4J241	0.55916	TRAV13-1	T cell receptor alpha variable 13-1
A0A0B4J244	0.5322	TRAV3	T cell receptor alpha variable 3
A0A0B4J245	0.56906	TRAV12-1	T cell receptor alpha variable 12-1
A0A0B4J248	0.56511	TRAV1-1	T cell receptor alpha variable 1-1
A0A0B4J249	0.55719	TRAV5	T cell receptor alpha variable 5
A0A0B4J262	0.53378	TRAV8-6	T cell receptor alpha variable 8-6
A0A0B4J263	0.54476	TRAV39	T cell receptor alpha variable 39
A0A0B4J264	0.54939	TRAV38-1	T cell receptor alpha variable 38-1
A0A0B4J265	0.55473	TRAV26-2	T cell receptor alpha variable 26-2
A0A0B4J266	0.57363	TRAV41	T cell receptor alpha variable 41
A0A0B4J268	0.5607	TRAV4	T cell receptor alpha variable 4
A0A0B4J271	0.55912	TRAV12-3	T cell receptor alpha variable 12-3
A0A0B4J272	0.55143	TRAV24	T cell receptor alpha variable 24
A0A0B4J273	0.55222	TRAV34	T cell receptor alpha variable 34
A0A0B4J274	0.56293	TRAV20	T cell receptor alpha variable 20
A0A0B4J275	0.51393	TRAV17	T cell receptor alpha variable 17
A0A0B4J276	0.55336	TRAV25	T cell receptor alpha variable 25
A0A0B4J277	0.58044	TRAV22	T cell receptor alpha variable 22
A0A0B4J279	0.55759	TRAV21	T cell receptor alpha variable 21
A0A0B4J280	0.55319	TRAV40	T cell receptor alpha variable 40
A0A0B4J2A2	0.81428	PPIAL4C	peptidylprolyl isomerase A like 4C
A0A0B4J2B6	0.56005	IGHV2OR16-5	immunoglobulin heavy variable 2/OR16-5 (non-functional)
A0A0B4J2B8	0.55605	IGHV1OR15-9	immunoglobulin heavy variable 1/OR15-9 (non-functional)
A0A0B4J2D5	0.54639	GATD3B	Putative glutamine amidotransferase-like class 1 domain-containing protein 3B, mitochondrial (Keio novel protein-I) (KNP-I) (Protein GT335) (Protein HES1)
A0A0B4J2D9	0.58447	IGKV1D-13	immunoglobulin kappa variable 1D-13
A0A0B4J2E0	0.54678	TRBV12-4	T cell receptor beta variable 12-4
A0A0B4J2E5	0.34185		Utp12 domain-containing protein
A0A0B4J2F2	0.50181	SIK1B	Putative serine/threonine-protein kinase SIK1B (EC 2.7.11.1) (Salt-inducible kinase 1B)
A0A0B4J2H0	0.58667	IGHV1-69D	immunoglobulin heavy variable 1-69D
A0A0C4DH24	0.5898	IGKV6-21	immunoglobulin kappa variable 6-21 (non-functional)
A0A0C4DH25	0.5767	IGKV3D-20	immunoglobulin kappa variable 3D-20
A0A0C4DH26	0.58381	IGKV6D-41	immunoglobulin kappa variable 6D-41 (non-functional)
A0A0C4DH27	0.52475	TRGV8	T cell receptor gamma variable 8
A0A0C4DH28	0.51785	TRGV4	T cell receptor gamma variable 4
A0A0C4DH29	0.55271	IGHV1-3	immunoglobulin heavy variable 1-3
A0A0C4DH30	0.54073	IGHV3-16	immunoglobulin heavy variable 3-16 (non-functional)
A0A0C4DH31	0.55049	IGHV1-18	immunoglobulin heavy variable 1-18
A0A0C4DH32	0.53856	IGHV3-20	immunoglobulin heavy variable 3-20
A0A0C4DH33	0.55389	IGHV1-24	immunoglobulin heavy variable 1-24
A0A0C4DH34	0.55375	IGHV4-28	immunoglobulin heavy variable 4-28
A0A0C4DH35	0.54728	IGHV3-35	immunoglobulin heavy variable 3-35 (non-functional)
A0A0C4DH36	0.54913	IGHV3-38	immunoglobulin heavy variable 3-38 (non-functional)
A0A0C4DH38	0.53493	IGHV5-51	immunoglobulin heavy variable 5-51
A0A0C4DH39	0.5444	IGHV1-58	immunoglobulin heavy variable 1-58
A0A0C4DH41	0.55365	IGHV4-61	immunoglobulin heavy variable 4-61
A0A0C4DH42	0.54829	IGHV3-66	immunoglobulin heavy variable 3-66
A0A0C4DH43	0.5625	IGHV2-70D	immunoglobulin heavy variable 2-70D
A0A0C4DH55	0.57248	IGKV3D-7	immunoglobulin kappa variable 3D-7
A0A0C4DH59	0.56143	TRBV5-4	T cell receptor beta variable 5-4
A0A0C4DH67	0.58502	IGKV1-8	immunoglobulin kappa variable 1-8
A0A0C4DH68	0.56153	IGKV2-24	immunoglobulin kappa variable 2-24
A0A0C4DH69	0.57573	IGKV1-9	immunoglobulin kappa variable 1-9
A0A0C4DH72	0.58388	IGKV1-6	immunoglobulin kappa variable 1-6
A0A0C4DH73	0.58518	IGKV1-12	immunoglobulin kappa variable 1-12
A0A0C4DH90	0.57539	IGKV3OR2-268	immunoglobulin kappa variable 3/OR2-268 (non-functional)
A0A0G2JKD1	0.522998	MUC21	mucin 21, cell surface associated
A0A0G2JLG4	0.3022	ASIC5	acid sensing ion channel subunit family member 5
A0A0G2JLM5	0.34303	KIR2DS5	killer cell immunoglobulin like receptor, two Ig domains and short cytoplasmic tail 5
A0A0G2JLQ3	0.4246	KIR2DS5	killer cell immunoglobulin like receptor, two Ig domains and short cytoplasmic tail 5
A0A0G2JMD5	0.537869	PRAMEF33	PRAME family member 33
A0A0G2JMH6	0.40579	HLA-DRA	major histocompatibility complex, class II, DR alpha
A0A0G2JMI3	0.5518	IGHV1-69-2	immunoglobulin heavy variable 1-69-2
A0A0G2JMM0	0.34644		Killer cell immunoglobulin-like receptor
A0A0G2JMP0	0.74977	OR4M2B	olfactory receptor family 4 subfamily M member 2B
A0A0G2JMS6	0.454032		Ovostatin
A0A0G2JN01	0.34547	KIR3DP1	killer cell immunoglobulin like receptor, three Ig domains pseudogene 1
A0A0G2JN53	0.88882		IQ motif and SEC7 domain-containing protein 3
A0A0G2JN68	0.43933	KIR2DL5B	killer cell immunoglobulin like receptor, two Ig domains and long cytoplasmic tail 5B
A0A0G2JNF4	0.42941	KIR2DP1	killer cell immunoglobulin like receptor, two Ig domains pseudogene 1
A0A0G2JNG1	0.42233	KIR2DS5	killer cell immunoglobulin like receptor, two Ig domains and short cytoplasmic tail 5
A0A0G2JNH3	0.6041		Olfactory receptor
A0A0G2JNQ3	0.55758	HNRNPCL2	heterogeneous nuclear ribonucleoprotein C like 2
A0A0G2JP20	0.60313	PRAMEF9	PRAME family member 9
A0A0G2JPB7	0.542804	BTNL2	butyrophilin like 2
A0A0G2JPC4	0.43782	KIR2DL5B	killer cell immunoglobulin like receptor, two Ig domains and long cytoplasmic tail 5B
A0A0G2JPF8	0.56041	HNRNPCL4	heterogeneous nuclear ribonucleoprotein C like 4
A0A0G2JQ47	0.42988	KIR2DS1	killer cell immunoglobulin like receptor, two Ig domains and short cytoplasmic tail 1
A0A0G2JRQ6	0.5727		Ig-like domain-containing protein
A0A0G2JS06	0.5435	IGLV5-39	immunoglobulin lambda variable 5-39
A0A0J9YVY3	0.53753	IGHV7-4-1	immunoglobulin heavy variable 7-4-1
A0A0J9YW62	0.54926		IGv domain-containing protein
A0A0J9YWL9	0.597	TEX13C	TEX13 family member C
A0A0J9YWU9	0.5369		Ig-like domain-containing protein
A0A0J9YX35	0.54286	IGHV3-64D	immunoglobulin heavy variable 3-64D
A0A0J9YX57	0.553006	MAGEB6B	MAGE family member B6B
A0A0J9YX75	0.55108	TRBV6-9	T cell receptor beta variable 6-9
A0A0J9YX94	0.523061	PNMA6F	PNMA family member 6F
A0A0J9YXQ4	0.516645	PNMA6E	PNMA family member 6E
A0A0J9YXX1	0.53529	IGHV5-10-1	immunoglobulin heavy variable 5-10-1
A0A0J9YXY3	0.54525	TRBV6-2	T cell receptor beta variable 6-2
A0A0J9YY54	0.82638	TEX13D	TEX13 family member D
A0A0J9YY99	0.541		Ig-like domain-containing protein
A0A0K0K1A3	0.54377	TRBV10-1	T cell receptor beta variable 10-1
A0A0K0K1A5	0.55182	TRBV6-5	T cell receptor beta variable 6-5
A0A0K0K1B3	0.54113	TRBV30	T cell receptor beta variable 30
A0A0K0K1C0	0.54876	TRBV11-1	T cell receptor beta variable 11-1
A0A0K0K1C4	0.53947	TRBV27	T cell receptor beta variable 27
A0A0K0K1D8	0.55315	TRBV6-1	T cell receptor beta variable 6-1
A0A0K0K1E9	0.5533	TRBV7-7	T cell receptor beta variable 7-7
A0A0K0K1G6	0.54627	TRBV10-3	T cell receptor beta variable 10-3
A0A0K0K1G8	0.53952	TRBV10-2	T cell receptor beta variable 10-2
A0A0K2S4Q6	0.63552	CD300H	CD300H molecule (gene/pseudogene)
A0A0M3HER8	0.693151	GOLGA6L10	golgin A6 family like 10
A0A0U1RQE8	0.71445	GLYATL1B	glycine-N-acyltransferase like 1B
A0A0U1RQI7	0.50829	KLF18	KLF transcription factor 18
A0A0U1RR11	0.38868	CENPVL1	centromere protein V like 1
A0A0U1RRI6	0.43211	CENPVL3	centromere protein V like 3
A0A0X1KG70	0.551074	OR4M2B	olfactory receptor family 4 subfamily M member 2B
A0A126GWB0	0.62707	OR2A2	olfactory receptor family 2 subfamily A member 2
A0A126GWI2	0.56703	OR2A25	olfactory receptor family 2 subfamily A member 25
A0A140G945	0.74461	CRYAA	crystallin alpha A
A0A140T8X8	0.522198	MUC21	mucin 21, cell surface associated
A0A140TA62	0.800916	LOC100653049	IF rod domain-containing protein
A0A191URJ7	0.42918	KIR2DL1	killer cell immunoglobulin like receptor, two Ig domains and long cytoplasmic tail 1
A0A1B0GTD5	0.33146	TEX49	Testis-expressed protein 49
A0A1B0GTE1	0.452466	CNTNAP3C	contactin associated protein family member 3C
A0A1B0GTH6	0.45007	CSNKA2IP	casein kinase 2 subunit alpha' interacting protein
A0A1B0GTH9	0.46955	LOC100505841	Zinc finger protein 474
A0A1B0GTI8	0.52391	TMEM272	transmembrane protein 272
A0A1B0GTK4	0.53808	FAM237A	family with sequence similarity 237 member A
A0A1B0GTL2	0.48967	C20orf204	chromosome 20 open reading frame 204
A0A1B0GTQ1	0.350648		Cytochrome P450 family 2 subfamily D member 6
A0A1B0GTS1	0.46502	HSFX4	heat shock transcription factor family, X-linked member 4
A0A1B0GTU1	0.33291	ZC3H11B	zinc finger CCCH-type containing 11B
A0A1B0GTW7	0.3555	CIROP	ciliated left-right organizer metallopeptidase
A0A1B0GTZ2	0.872755	CCDC196	coiled-coil domain containing 196
A0A1B0GUA7	0.73871	TEX51	testis expressed 51
A0A1B0GUJ8	0.44562	PNMA8C	PNMA family member 8C
A0A1B0GUL7	0.50516		Protein kinase domain-containing protein
A0A1B0GUS4	0.782	UBE2L5	ubiquitin conjugating enzyme E2 L5
A0A1B0GUU1	0.478267	C17orf113	chromosome 17 open reading frame 113
A0A1B0GUV8	0.50139	LOC102723971	Lipocln_cytosolic_FA-bd_dom domain-containing protein
A0A1B0GUW6	0.88807	SPEM3	SPEM family member 3
A0A1B0GUX0	0.41052	ATP6V1FNB	Protein ATP6V1FNB (ATP6V1F neighbor gene protein)
A0A1B0GV03	0.822692	GOLGA6L7	golgin A6 family like 7
A0A1B0GV85	0.54757	REELD1	reeler domain containing 1
A0A1B0GVD1	0.54179	FAM237B	family with sequence similarity 237 member B
A0A1B0GVG4	0.90588	CCDC194	coiled-coil domain containing 194
A0A1B0GVH4	0.32524	PRSS51	serine protease 51
A0A1B0GVH7	0.35142	IQCM	IQ motif containing M
A0A1B0GVK7	0.63997	FAM240A	family with sequence similarity 240 member A
A0A1B0GVR7	0.66096	FAM240C	family with sequence similarity 240 member C
A0A1B0GVZ2	0.65511	FAM240B	family with sequence similarity 240 member B
A0A1B0GVZ9	0.63632	TMEM269	transmembrane protein 269
A0A1B0GW15	0.89897	LOC122394732	Transposase
A0A1B0GW35	0.52773	EXOC1L	exocyst complex component 1 like
A0A1B0GWH4	0.46394	HSFX3	heat shock transcription factor family, X-linked member 3
A0A1B0GWK0	0.511534	PVALEF	parvalbumin like EF-hand containing
A0A1B0GX31	0.55145	TRBV7-6	T cell receptor beta variable 7-6
A0A1B0GX49	0.54922	TRBV6-4	T cell receptor beta variable 6-4
A0A1B0GX51	0.55229	TRBV7-8	T cell receptor beta variable 7-8
A0A1B0GX56	0.55345	TRDV1	T cell receptor delta variable 1
A0A1B0GX68	0.54473	TRBV2	T cell receptor beta variable 2
A0A1B0GX78	0.5444	TRBV12-5	T cell receptor beta variable 12-5
A0A1B0GX95	0.58151	TRBV7-4	T cell receptor beta variable 7-4
A0A1B0GXF2	0.54486	TRBV7-2	T cell receptor beta variable 7-2
A0A1W2PN81	0.37407	CHRNA7	cholinergic receptor nicotinic alpha 7 subunit
A0A1W2PP81	0.60675	TAF11L5	TATA-box binding protein associated factor 11 like 5
A0A1W2PP97	0.40591	THSD8	thrombospondin type 1 domain containing 8
A0A1W2PPD8	0.32143	KDM4F	lysine demethylase 4F
A0A1W2PPE2	0.60122	TAF11L4	TATA-box binding protein associated factor 11 like 4
A0A1W2PPF3	0.631962	DUXB	double homeobox B
A0A1W2PPG7	0.5359	GNG14	G protein subunit gamma 14
A0A1W2PPH5	0.6074	TAF11L13	TATA-box binding protein associated factor 11 like 13
A0A1W2PPK0	0.52413	CPHXL2	cytoplasmic polyadenylated homeobox like 2
A0A1W2PPL8	0.60064	TAF11L14	TATA-box binding protein associated factor 11 like 14
A0A1W2PPM1	0.52772	CPHXL	cytoplasmic polyadenylated homeobox like
A0A1W2PPW3	0.61436	TAF11L12	TATA-box binding protein associated factor 11 like 12
A0A1W2PQ09	0.60086	TAF11L11	TATA-box binding protein associated factor 11 like 11
A0A1W2PQ27	0.54243	SSU72P7	RNA polymerase II subunit A C-terminal domain phosphatase SSU72 (CTD phosphatase SSU72) (EC 3.1.3.16)
A0A1W2PQ64	0.54232	SSU72P5	RNA polymerase II subunit A C-terminal domain phosphatase SSU72 (CTD phosphatase SSU72) (EC 3.1.3.16)
A0A1W2PQ72	0.689425	MSANTD7	Myb/SANT DNA binding domain containing 7
A0A1W2PQ73	0.56066	ERFL	ETS repressor factor like
A0A1W2PQC6	0.54274	SSU72P4	RNA polymerase II subunit A C-terminal domain phosphatase SSU72 (CTD phosphatase SSU72) (EC 3.1.3.16)
A0A1W2PQD8	0.54229	SSU72P2	RNA polymerase II subunit A C-terminal domain phosphatase SSU72 (CTD phosphatase SSU72) (EC 3.1.3.16)
A0A1W2PQF6	0.42762		KIR2DL2
A0A1W2PQJ5	0.54079	SSU72P3	RNA polymerase II subunit A C-terminal domain phosphatase SSU72 (CTD phosphatase SSU72) (EC 3.1.3.16)
A0A1W2PQL4	0.394093	ZNF722	zinc finger protein 722
A0A1W2PQM1	0.44773		Killer cell immunoglobulin-like receptor
A0A1W2PR19	0.42748	GSTT4	glutathione S-transferase theta 4
A0A1W2PR48	0.70878	TLE7	TLE family member 7
A0A1W2PR64	0.60685	TAF11L9	TATA-box binding protein associated factor 11 like 9
A0A1W2PR75	0.53782	SSU72P8	RNA polymerase II subunit A C-terminal domain phosphatase SSU72 (CTD phosphatase SSU72) (EC 3.1.3.16)
A0A1W2PR82	0.4141	PERCC1	proline and glutamate rich with coiled coil 1
A0A1W2PR95	0.45598	IGBP1P2	HCG1642624, isoform CRA_a (Immunoglobulin (CD79A)-binding protein 1 pseudogene 2)
A0A1W2PRG0	0.42901		glutathione transferase (EC 2.5.1.18)
A0A1W2PRN1	0.879783		GOLGA2L5 domain-containing protein
A0A1W2PRN6	0.60308	LINC02218	long intergenic non-protein coding RNA 2218
A0A1W2PRP0	0.58624	FOXL3	forkhead box L3
A0A1W2PRS3	0.43552		Killer cell immunoglobulin-like receptor KIR2DL1
A0A1W2PRV1	0.60551	TAF11L3	TATA-box binding protein associated factor 11 like 3
A0A1W2PS18	0.58207	PMIS2	PMIS2 transmembrane protein
A0A286YEU6	0.52564	OR1R1P	olfactory receptor family 1 subfamily R member 1 pseudogene
A0A286YF58	0.89338	TMEM271	transmembrane protein 271
A0A2R8Y422	0.582831	RPS27AP5	ribosomal protein S27a pseudogene 5
A0A2R8Y4L2	0.40944	HNRNPA1L3	heterogeneous nuclear ribonucleoprotein A1 like 3
A0A2R8Y4L6	0.59472	OR5D3P	olfactory receptor family 5 subfamily D member 3 pseudogene
A0A2R8Y4M4	0.69569	LOC122513141	RING-type domain-containing protein
A0A2R8Y4Y8	0.56286	OOSP4B	oocyte secreted protein family member 4B
A0A2R8Y5M8	0.63755	TOMT	transmembrane O-methyltransferase
A0A2R8Y619	0.65987	H2BK1	H2B.K variant histone 1
A0A2R8Y7D0	0.80272	TINCR	TINCR ubiquitin domain containing
A0A2R8YCY7	0.43167		KIR2DL2
A0A2R8YE69	0.77585		MIA SH3 domain ER export factor 2
A0A2R8YED5	0.60045	OR5BS1P	olfactory receptor family 5 subfamily BS member 1 pseudogene
A0A2R8YEG4	0.62376	OR2A1	olfactory receptor family 2 subfamily A member 1
A0A2R8YEH3	0.63204	LOC112268384	Olfactory receptor
A0A2R8YEV3	0.62744	OR2A42	olfactory receptor family 2 subfamily A member 42
A0A2R8YFL7	0.56569	OOSP4A	oocyte secreted protein family member 4A
A0A2R8YFM6	0.57188	OOSP3	oocyte secreted protein family member 3
A0A2R8YFR7	0.35753		DH domain-containing protein
A0A376A8Z9	0.42099	KIR2DS5	killer cell immunoglobulin like receptor, two Ig domains and short cytoplasmic tail 5
A0A3B3IRS2	0.47349	LOC647264	Keratin-associated protein 21-1-like
A0A3B3IRV3	0.67513	MCTS2	MCTS family member 2
A0A3B3IT33	0.413822	TRIM51G	tripartite motif-containing 51G
A0A3B3IT45	0.62672	OR51C1P	olfactory receptor family 51 subfamily C member 1 pseudogene
A0A3B3IT52	0.49901	MSANTD5	Myb/SANT DNA binding domain containing 5
A0A3B3IU63	0.64118	H2AL3	H2A.L variant histone 3
A0A494C071	0.472237	PWWP4	PWWP domain containing 4
A0A494C086	0.54907	SPDYE21	speedy/RINGO cell cycle regulator family member E21
A0A494C0I6	0.89221		Secreted protein
A0A494C0N9	0.77453	FAM246B	family with sequence similarity 246 member B
A0A494C0Y3	0.83185	FAM246A	family with sequence similarity 246 member A
A0A494C0Z2	0.54505	SPDYE13	speedy/RINGO cell cycle regulator family member E13
A0A494C103	0.60429	LOC112577516	CUB domain-containing protein
A0A494C191	0.54786	SPDYE9	speedy/RINGO cell cycle regulator family member E9
A0A494C1R9	0.40482	TSPY9	testis specific protein Y-linked 9
A0A499FJF3	0.37749		Rho-GAP domain-containing protein
A0A4W9AIG4	0.64965	OR2A14	olfactory receptor family 2 subfamily A member 14
A0A539	0.54101	TRBV4-2	T cell receptor beta variable 4-2
A0A576	0.54814	TRBV3-1	T cell receptor beta variable 3-1
A0A577	0.55335	TRBV4-1	T cell receptor beta variable 4-1
A0A578	0.54325	TRBV5-1	T cell receptor beta variable 5-1
A0A584	0.55244	TRBV11-2	T cell receptor beta variable 11-2
A0A589	0.54567	TRBV4-3	T cell receptor beta variable 4-3
A0A597	0.55761	TRBV5-5	T cell receptor beta variable 5-5
A0A599	0.54226	TRBV5-6	T cell receptor beta variable 5-6
A0A5A2	0.54133	TRBV5-8	T cell receptor beta variable 5-8
A0A5A6	0.54464	TRBV11-3	T cell receptor beta variable 11-3
A0A5B0	0.53897	TRBV14	T cell receptor beta variable 14
A0A5B6	0.54149	TRBV28	T cell receptor beta variable 28
A0A5B7	0.56182	TRBV29-1	T cell receptor beta variable 29-1
A0A5B9	0.55786	TRBC2	T cell receptor beta constant 2
A0A5F9Z9Y6	0.43609		KIR2DL2
A0A5F9ZH88	0.42594		KIR2DL1
A0A5F9ZHS7	0.79189	NFILZ	NFIL3 like basic leucine zipper
A0A5K1VDZ0	0.43304	KIR2DL1	killer cell immunoglobulin like receptor, two Ig domains and long cytoplasmic tail 1
A0A5S8K742	0.3828
A0A7I2V3D3	0.88362
A0A7I2V3R4	0.49065	LOC122319436	RING-type domain-containing protein
A0AUZ9	0.92193	KANSL1L	KAT8 regulatory NSL complex subunit 1 like
A0AV02	0.40118	SLC12A8	solute carrier family 12 member 8
A0AV96	0.539062	RBM47	RNA binding motif protein 47
A0AVF1	0.50807	TTC26	Intraflagellar transport protein 56 (Tetratricopeptide repeat protein 26) (TPR repeat protein 26)
A0AVI2	0.356615	FER1L5	fer-1 like family member 5
A0AVI4	0.386114	TMEM129	transmembrane protein 129, E3 ubiquitin ligase
A0AVK6	0.37218	E2F8	E2F transcription factor 8
A0AVT1	0.51318	UBA6	ubiquitin like modifier activating enzyme 6
A0FGR8	0.411716	ESYT2	extended synaptotagmin 2
A0FGR9	0.419941	ESYT3	extended synaptotagmin 3
A0JD32	0.54944	TRAV38-2DV8	T cell receptor alpha variable 38-2/delta variable 8
A0JD36	0.55548	TRDV2	T cell receptor delta variable 2
A0JD37	0.62493	TRDV3	T cell receptor delta variable 3
A0JLT2	0.34924	MED19	mediator complex subunit 19
A0JNW5	0.29413	BLTP3B	bridge-like lipid transfer protein family member 3B
A0JP26	0.616107	POTEB3	POTE ankyrin domain family member B3
A0M8Q6	0.61386	IGLC7	immunoglobulin lambda constant 7
A0MZ66	0.855204	SHTN1	shootin 1
A0PG75	0.75584	PLSCR5	phospholipid scramblase family member 5
A0PJE2	0.79085	DHRS12	dehydrogenase/reductase 12
A0PJK1	0.30726	SLC5A10	solute carrier family 5 member 10
A0PJW6	0.71843	TMEM223	transmembrane protein 223
A0PJX0	0.37788	CIB4	calcium and integrin binding family member 4
A0PJX2	0.38111	TLDC2	TBC/LysM-associated domain containing 2
A0PJX4	0.36652	SHISA3	shisa family member 3
A0PJX8	0.43003	TMEM82	transmembrane protein 82
A0PJY2	0.365597	FEZF1	FEZ family zinc finger 1
A0PJZ0	0.48258	ANKRD20A5P	ankyrin repeat domain 20 family member A5, pseudogene
A0PJZ3	0.52859	GXYLT2	glucoside xylosyltransferase 2
A0PK00	0.43348	TMEM120B	transmembrane protein 120B
A0PK05	0.81915	TMEM72	transmembrane protein 72
A0PK11	0.60445	CLRN2	clarin 2
A0ZSE6	0.48229	TMEM30CP	transmembrane protein 30C, pseudogene
A1A4S6	0.60394	ARHGAP10	Rho GTPase activating protein 10
A1A4V9	0.45973	CFAP119	cilia and flagella associated protein 119
A1A4Y4	0.6018	IRGM	immunity related GTPase M
A1A519	0.47865	FAM170A	family with sequence similarity 170 member A
A1A5B4	0.2939	ANO9	anoctamin 9
A1A5C7	0.69736	SLC22A23	solute carrier family 22 member 23
A1A5D9	0.66395	BICDL2	BICD family like cargo adaptor 2
A1IGU5	0.605271	ARHGEF37	Rho guanine nucleotide exchange factor 37
A1KZ92	0.474752	PXDNL	peroxidasin like
A1L020	0.660952	MEX3A	mex-3 RNA binding family member A
A1L0T0	0.84431	ILVBL	ilvB acetolactate synthase like
A1L157	0.45829	TSPAN11	tetraspanin 11
A1L162	0.69868	ERICH2	glutamate rich 2
A1L167	0.62933	UBE2QL1	ubiquitin conjugating enzyme E2 Q family like 1
A1L168	0.89538	C20orf202	chromosome 20 open reading frame 202
A1L188	0.53376	NDUFAF8	NADH:ubiquinone oxidoreductase complex assembly factor 8
A1L1A6	0.66731	IGSF23	immunoglobulin superfamily member 23
A1L390	0.36725	PLEKHG3	pleckstrin homology and RhoGEF domain containing G3
A1L3X0	0.48936	ELOVL7	ELOVL fatty acid elongase 7
A1L443	0.438044	NUTM2F	NUT family member 2F
A1L453	0.34209	PRSS38	serine protease 38
A1L4H1	0.426488	SSC5D	scavenger receptor cysteine rich family member with 5 domains
A1L4K1	0.476932	FSD2	fibronectin type III and SPRY domain containing 2
A1L4L8	0.47888	PLAC8L1	PLAC8 like 1
A1X283	0.536619	SH3PXD2B	SH3 and PX domains 2B
A1XBS5	0.89308	CIBAR1	CBY1 interacting BAR domain containing 1
A1YPR0	0.354162	ZBTB7C	zinc finger and BTB domain containing 7C
A1Z1Q3	0.45958	MACROD2	mono-ADP ribosylhydrolase 2
A2A288	0.62175	ZC3H12D	zinc finger CCCH-type containing 12D
A2A2Y4	0.357202	FRMD3	FERM domain containing 3
A2A2Z9	0.703803	ANKRD18B	ankyrin repeat domain 18B
A2A368	0.39988	MAGEB16	MAGE family member B16
A2A3K4	0.34925	PTPDC1	protein tyrosine phosphatase domain containing 1
A2A3L6	0.63233	TTC24	tetratricopeptide repeat domain 24
A2A3N6	0.559199	PIPSL	PIP5K1A and PSMD4 like (pseudogene)
A2CJ06	0.470119	DYTN	dystrotelin
A2IDD5	0.913136	CCDC78	coiled-coil domain containing 78
A2NJV5	0.56382	IGKV2-29	immunoglobulin kappa variable 2-29
A2PYH4	0.584364	HFM1	helicase for meiosis 1
A2RRD8	0.407726	ZNF320	zinc finger protein 320
A2RRH5	0.734842	WDR27	WD repeat domain 27
A2RRP1	0.498498	NBAS	NBAS subunit of NRZ tethering complex
A2RTX5	0.665933	TARS3	threonyl-tRNA synthetase 3
A2RTY3	0.52469	HEATR9	HEAT repeat containing 9
A2RU14	0.63599	TMEM218	transmembrane protein 218
A2RU30	0.55856	TESPA1	thymocyte expressed, positive selection associated 1
A2RU48	0.53397	SMCO3	single-pass membrane protein with coiled-coil domains 3
A2RU49	0.70198	HYKK	hydroxylysine kinase
A2RU54	0.60231	HMX2	H6 family homeobox 2
A2RU67	0.6108	FAM234B	family with sequence similarity 234 member B
A2RUB1	0.52128	MEIOC	meiosis specific with coiled-coil domain
A2RUB6	0.741228	CCDC66	coiled-coil domain containing 66
A2RUC4	0.35119	TYW5	tRNA-yW synthesizing protein 5
A2RUH7	0.674842	MYBPHL	myosin binding protein H like
A2RUR9	0.770796	CCDC144A	coiled-coil domain containing 144A
A2RUS2	0.45489	DENND3	DENN domain containing 3
A2RUU4	0.33583	CLPSL1	colipase like 1
A2VCK2	0.637489	DCDC2B	doublecortin domain containing 2B
A2VDF0	0.43751	FUOM	fucose mutarotase
A2VDJ0	0.500155	TMEM131L	transmembrane 131 like
A3KFT3	0.61816	OR2M5	olfactory receptor family 2 subfamily M member 5
A3KMH1	0.552605	VWA8	von Willebrand factor A domain containing 8
A3KN83	0.50799	SBNO1	strawberry notch homolog 1
A3QJZ6	0.58534	PRAMEF22	PRAME family member 22
A3QJZ7	0.60533	PRAMEF27	PRAME family member 27
A4D0S4	0.428476	LAMB4	laminin subunit beta 4
A4D0V7	0.442084	CPED1	cadherin like and PC-esterase domain containing 1
A4D126	0.52894	CRPPA	CDP-L-ribitol pyrophosphorylase A
A4D161	0.34318	FAM221A	family with sequence similarity 221 member A
A4D1B5	0.360817	GSAP	gamma-secretase activating protein
A4D1E1	0.69026	ZNF804B	zinc finger protein 804B
A4D1E9	0.537489	GTPBP10	GTP binding protein 10
A4D1F6	0.575603	LRRD1	leucine rich repeats and death domain containing 1
A4D1P6	0.674004	WDR91	WD repeat domain 91
A4D1S0	0.36961	KLRG2	killer cell lectin like receptor G2
A4D1S5	0.9579	RAB19	RAB19, member RAS oncogene family
A4D1T9	0.36375	PRSS37	serine protease 37
A4D1U4	0.48416	DENND11	DENN domain containing 11
A4D1Z8	0.52102	GRIFIN	galectin-related inter-fiber protein
A4D256	0.35193	CDC14C	cell division cycle 14C
A4D2B0	0.66821	MBLAC1	metallo-beta-lactamase domain containing 1
A4D2B8	0.62008	PMS2P1	PMS1 homolog 2, mismatch repair system component pseudogene 1
A4D2G3	0.62613	OR2A25	olfactory receptor family 2 subfamily A member 25
A4D2H0	0.794472	CTAGE15	CTAGE family member 15
A4D2P6	0.406405	GRID2IP	Grid2 interacting protein
A4FU01	0.31087	MTMR11	myotubularin related protein 11
A4FU28	0.799086	CTAGE9	CTAGE family member 9
A4FU49	0.746738	SH3D21	SH3 domain containing 21
A4FU69	0.266838	EFCAB5	EF-hand calcium binding domain 5
A4GXA9	0.540775	EME2	essential meiotic structure-specific endonuclease subunit 2
A4IF30	0.76312	SLC35F4	solute carrier family 35 member F4
A4QMS7	0.33695	C5orf49	Uncharacterized protein C5orf49
A4QPB2	0.68389	LRP5L	LDL receptor related protein 5 like (pseudogene)
A4QPH2	0.472051	PI4KAP2	phosphatidylinositol 4-kinase alpha pseudogene 2
A5A3E0	0.798602	POTEF	POTE ankyrin domain family member F
A5D6W6	0.45031	FITM1	fat storage inducing transmembrane protein 1
A5D8T8	0.369275	CLEC18A	C-type lectin domain family 18 member A
A5D8V6	0.48687	VPS37C	VPS37C subunit of ESCRT-I
A5D8V7	0.647658	ODAD3	outer dynein arm docking complex subunit 3
A5D8W1	0.46862	CFAP69	cilia and flagella associated protein 69
A5LHX3	0.91071	PSMB11	proteasome subunit beta 11
A5PKW4	0.412323	PSD	pleckstrin and Sec7 domain containing
A5PLK6	0.471069	RGSL1	regulator of G protein signaling like 1
A5PLL1	0.47664	ANKRD34B	ankyrin repeat domain 34B
A5PLL7	0.39998	PEDS1	plasmanylethanolamine desaturase 1
A5PLN9	0.563905	TRAPPC13	trafficking protein particle complex subunit 13
A5X5Y0	0.36784	HTR3E	5-hydroxytryptamine receptor 3E
A5YKK6	0.444728	CNOT1	CCR4-NOT transcription complex subunit 1
A5YM72	0.42355	CARNS1	carnosine synthase 1
A6BM72	0.31822	MEGF11	multiple EGF like domains 11
A6H8M9	0.549086	CDHR4	cadherin related family member 4
A6H8Y1	0.47836	BDP1	B double prime 1, subunit of RNA polymerase III transcription initiation factor IIIB
A6H8Z2	0.34192	FAM221B	family with sequence similarity 221 member B
A6NC42	0.57466	DPPA5	developmental pluripotency associated 5
A6NC51	0.79617	TMEM150B	transmembrane protein 150B
A6NC57	0.745414	ANKRD62	ankyrin repeat domain 62
A6NC78	0.830172	GOLGA8IP	golgin A8 family member I, pseudogene
A6NC86	0.36028	PINLYP	phospholipase A2 inhibitor and LY6/PLAUR domain containing
A6NC97	0.64592	FAM172BP	Putative protein FAM172B (FAM172B pseudogene)
A6NC98	0.575779	CCDC88B	coiled-coil domain containing 88B
A6NCC3	0.856583	GOLGA8O	golgin A8 family member O
A6NCE7	0.51937	MAP1LC3B2	microtubule associated protein 1 light chain 3 beta 2
A6NCF5	0.577886	KLHL33	kelch like family member 33
A6NCF6	0.41981	MAGEA13P	MAGE family member A13, pseudogene
A6NCI4	0.494108	VWA3A	von Willebrand factor A domain containing 3A
A6NCK2	0.399469	TRIM43B	tripartite motif containing 43B
A6NCL1	0.87015	GMNC	geminin coiled-coil domain containing
A6NCL2	0.3246	LRCOL1	leucine rich colipase like 1
A6NCL7	0.44585	ANKRD33B	ankyrin repeat domain 33B
A6NCM1	0.40945	IQCA1L	IQ motif containing with AAA domain 1 like
A6NCN2	0.84412	KRT87P	keratin 87, pseudogene
A6NCN8	0.59925	TEX52	testis expressed 52
A6NCQ9	0.64009	RNF222	ring finger protein 222
A6NCS4	0.5819	NKX2-6	NK2 homeobox 6
A6NCS6	0.61228	C2orf72	chromosome 2 open reading frame 72
A6NCV1	0.61565	OR6C74	olfactory receptor family 6 subfamily C member 74
A6NCW0	0.34932	USP17L3	ubiquitin specific peptidase 17 like family member 3
A6NCW7	0.34962	USP17L4	ubiquitin specific peptidase 17 like family member 4
A6ND01	0.38874	IZUMO1R	IZUMO1 receptor, JUNO
A6ND36	0.611441	FAM83G	family with sequence similarity 83 member G
A6ND48	0.6042	OR14I1	olfactory receptor family 14 subfamily I member 1
A6ND91	0.61572	ASPDH	aspartate dehydrogenase domain containing
A6NDA9	0.550353	LRIT2	leucine rich repeat, Ig-like and transmembrane domains 2
A6NDB9	0.75388	PALM3	paralemmin 3
A6NDE4	0.57549	RBMY1B	RNA binding motif protein Y-linked family 1 member B
A6NDG6	0.83144	PGP	phosphoglycolate phosphatase
A6NDH6	0.60146	OR5H15	olfactory receptor family 5 subfamily H member 15
A6NDI0	0.34545	TRIM49B	tripartite motif containing 49B
A6NDK9	0.799356	GOLGA6C	golgin A6 family member C
A6NDL7	0.78164	METTL21EP	methyltransferase like 21E, pseudogene
A6NDL8	0.6101	OR6C68	olfactory receptor family 6 subfamily C member 68
A6NDN3	0.815465	GOLGA6B	golgin A6 family member B
A6NDN8	0.81062		Putative ubiquitin-like protein FUBI-like protein ENSP00000310146
A6NDP7	0.50655	MYADML2	myeloid associated differentiation marker like 2
A6NDR6	0.59242	MEIS3P1	Meis homeobox 3 pseudogene 1
A6NDS4	0.37327	TBC1D3B	TBC1 domain family member 3B
A6NDU8	0.4868	RIMOC1	RAB7A interacting MON1-CCZ1 complex subunit 1
A6NDV4	0.552136	TMEM8B	transmembrane protein 8B
A6NDX5	0.416934	ZNF840P	zinc finger protein 840, pseudogene
A6NDY0	0.54326	PABPN1L	PABPN1 like, cytoplasmic
A6NE01	0.671629	FAM186A	family with sequence similarity 186 member A
A6NE02	0.35089	BTBD17	BTB domain containing 17
A6NE52	0.56981	WDR97	WD repeat domain 97
A6NEC2	0.62479	NPEPPSL1	Puromycin-sensitive aminopeptidase-like protein (EC 3.4.11.-)
A6NED2	0.55285	RCCD1	RCC1 domain containing 1
A6NEE1	0.585916	PLEKHD1	pleckstrin homology and coiled-coil domain containing D1
A6NEF3	0.799146	GOLGA6L4	golgin A6 family like 4
A6NEH6	0.88938	TMEM247	transmembrane protein 247
A6NEK1	0.39997	ARRDC5	arrestin domain containing 5
A6NEL2	0.482436	SOWAHB	sosondowah ankyrin repeat domain family member B
A6NEM1	0.905253	GOLGA6L9	golgin A6 family like 9
A6NEN9	0.43369	CXorf65	chromosome X open reading frame 65
A6NEQ0	0.57507	RBMY1E	RNA binding motif protein Y-linked family 1 member E
A6NER0	0.36738	TBC1D3F	TBC1 domain family member 3F
A6NES4	0.503615	MROH2A	maestro heat like repeat family member 2A
A6NET4	0.55101	OR5K3	olfactory receptor family 5 subfamily K member 3
A6NEV1	0.5814	PRR23A	proline rich 23A
A6NEY3	0.803099	GOLGA6L3	Putative golgin subfamily A member 6-like protein 3
A6NEY8	0.88711	PRORSD1P	prolyl-tRNA synthetase associated domain containing 1, pseudogene
A6NF34	0.55953	ANTXRL	ANTXR like
A6NF36	0.7461	CCDC182	coiled-coil domain containing 182
A6NF89	0.61731	OR6C6	olfactory receptor family 6 subfamily C member 6
A6NFA1	0.35771	TRABD2B	TraB domain containing 2B
A6NFC5	0.72412	TMEM235	transmembrane protein 235
A6NFC9	0.56209	OR2W5P	olfactory receptor family 2 subfamily W member 5 pseudogene
A6NFD8	0.620111	HELT	helt bHLH transcription factor
A6NFE2	0.875814	SMCO2	single-pass membrane protein with coiled-coil domains 2
A6NFE3	0.513275	EFCAB10	EF-hand calcium binding domain 10
A6NFF2	0.61155	NAP1L6P	nucleosome assembly protein 1 like 6, pseudogene
A6NFH5	0.45899	FABP12	fatty acid binding protein 12
A6NFI3	0.40706	ZNF316	zinc finger protein 316
A6NFK2	0.37234	GRXCR2	glutaredoxin and cysteine rich domain containing 2
A6NFN3	0.59766	RBFOX3	RNA binding fox-1 homolog 3
A6NFN9	0.47727	ANKUB1	ankyrin repeat and ubiquitin domain containing 1
A6NFQ2	0.32335	TCAF2	TRPM8 channel associated factor 2
A6NFQ7	0.62723	DPRX	divergent-paired related homeobox
A6NFT4	0.41611	CFAP73	cilia and flagella associated protein 73
A6NFU0	0.32209	FAM187A	family with sequence similarity 187 member A
A6NFU8	0.49664	PGPEP1L	pyroglutamyl-peptidase I like
A6NFX1	0.82234	MFSD2B	MFSD2 lysolipid transporter B, sphingolipid
A6NFY4	0.355878	NEMP2	nuclear envelope integral membrane protein 2
A6NFY7	0.58482	SDHAF1	succinate dehydrogenase complex assembly factor 1
A6NG13	0.659344	MGAT4D	MGAT4 family member D
A6NGA9	0.75378	TMEM202	transmembrane protein 202
A6NGB0	0.811144	TMEM191C	transmembrane protein 191C
A6NGB7	0.66262	TMEM221	transmembrane protein 221
A6NGC4	0.54017	TLCD2	TLC domain containing 2
A6NGD5	0.388468	ZSCAN5C	zinc finger and SCAN domain containing 5C
A6NGE4	0.65322	DCAF8L1	DDB1 and CUL4 associated factor 8 like 1
A6NGE7	0.37553	URAD	ureidoimidazoline (2-oxo-4-hydroxy-4-carboxy-5-) decarboxylase
A6NGG8	0.788941	PCARE	photoreceptor cilium actin regulator
A6NGH7	0.82639	CCDC160	coiled-coil domain containing 160
A6NGH8	0.50013	ANKRD61	ankyrin repeat domain 61
A6NGJ6	0.401147	TRIM64	tripartite motif containing 64
A6NGN4	0.59572	PRAMEF25	PRAME family member 25
A6NGN9	0.45033	IGLON5	IgLON family member 5
A6NGQ2	0.57419	OOEP	oocyte expressed protein
A6NGR9	0.47276	MROH6	maestro heat like repeat family member 6
A6NGS2	0.66589	ERICH4	glutamate rich 4
A6NGU5	0.69852	GGT3P	gamma-glutamyltransferase 3 pseudogene
A6NGW2	0.413767	STRCP1	stereocilin pseudogene 1
A6NGY1	0.60964	FRG2C	FSHD region gene 2 family member C
A6NGY3	0.8733	C5orf52	chromosome 5 open reading frame 52
A6NGY5	0.60094	OR51F1	olfactory receptor family 51 subfamily F member 1
A6NH00	0.62855	OR2T8	olfactory receptor family 2 subfamily T member 8
A6NH11	0.456	GLTPD2	glycolipid transfer protein domain containing 2
A6NH21	0.44914	SERINC4	serine incorporator 4
A6NH52	0.5036	TVP23A	trans-golgi network vesicle protein 23 homolog A
A6NH57	0.79688	ARL5C	ADP ribosylation factor like GTPase 5C
A6NHA9	0.60312	OR4C46	olfactory receptor family 4 subfamily C member 46
A6NHC0	0.332811	CAPN8	calpain 8
A6NHG4	0.51786	DDTL	D-dopachrome tautomerase like
A6NHG9	0.61414	OR5H14	olfactory receptor family 5 subfamily H member 14
A6NHJ4	0.397289	ZNF860	zinc finger protein 860
A6NHL2	0.60039	TUBAL3	tubulin alpha like 3
A6NHM9	0.37079	MOXD2P	monooxygenase DBH like 2, pseudogene
A6NHN0	0.68251	OTOL1	otolin 1
A6NHP3	0.54138	SPDYE2B	speedy/RINGO cell cycle regulator family member E2B
A6NHQ2	0.88138	FBLL1	fibrillarin like 1
A6NHR9	0.591722	SMCHD1	structural maintenance of chromosomes flexible hinge domain containing 1
A6NHS7	0.40537	MANSC4	MANSC domain containing 4
A6NHT5	0.61201	HMX3	H6 family homeobox 3
A6NHX0	0.33867	CASTOR2	cytosolic arginine sensor for mTORC1 subunit 2
A6NHY2	0.47879	ANKDD1B	ankyrin repeat and death domain containing 1B
A6NHZ5	0.45595	LRRC14B	leucine rich repeat containing 14B
A6NI03	0.40719	TRIM64B	tripartite motif containing 64B
A6NI15	0.58844	MSGN1	mesogenin 1
A6NI28	0.586449	ARHGAP42	Rho GTPase activating protein 42
A6NI47	0.52666	POTEM	POTE ankyrin domain family member M
A6NI56	0.747946	CCDC154	coiled-coil domain containing 154
A6NI61	0.61884	MYMK	myomaker, myoblast fusion factor
A6NI72	0.389254	NCF1B	neutrophil cytosolic factor 1B (pseudogene)
A6NI73	0.44123	LILRA5	leukocyte immunoglobulin like receptor A5
A6NI79	0.848038	CCDC69	coiled-coil domain containing 69
A6NI86	0.837401	GOLGA6L10	golgin A6 family like 10
A6NI87	0.88144	CBY3	chibby family member 3
A6NIE6	0.44908	RRN3P2	RRN3 pseudogene 2
A6NIE9	0.36481	PRSS29P	serine protease 29, pseudogene
A6NIH7	0.48091	UNC119B	unc-119 lipid binding chaperone B
A6NIJ9	0.62154	OR6C70	olfactory receptor family 6 subfamily C member 70
A6NIK2	0.83647	LRRC10B	leucine rich repeat containing 10B
A6NIM6	0.75629	SLC15A5	solute carrier family 15 member 5
A6NIN4	0.47745	RNF227	ring finger protein 227
A6NIR3	0.527345	AGAP5	ArfGAP with GTPase domain, ankyrin repeat and PH domain 5
A6NIV6	0.66243	LRRIQ4	leucine rich repeats and IQ motif containing 4
A6NIX2	0.502567	WTIP	WT1 interacting protein
A6NIY4	0.54391	SPDYE5	speedy/RINGO cell cycle regulator family member E5
A6NIZ1	0.92375		Ras-related protein Rap-1b-like protein
A6NJ46	0.62478	NKX6-3	NK6 homeobox 3
A6NJ64	0.92385	NPIPB2	nuclear pore complex interacting protein family member B2
A6NJ78	0.51358	METTL15	methyltransferase 15, mitochondrial 12S rRNA N4-cytidine
A6NJ88	0.427241	SAGE2P	sarcoma antigen 2, pseudogene
A6NJG2	0.44122	SOWAHD	sosondowah ankyrin repeat domain family member D
A6NJG6	0.594	ARGFX	arginine-fifty homeobox
A6NJI9	0.67582	LRRC72	leucine rich repeat containing 72
A6NJJ6	0.41085	C19orf67	chromosome 19 open reading frame 67
A6NJL1	0.395493	ZSCAN5B	zinc finger and SCAN domain containing 5B
A6NJR5	0.53283		Putative speedy protein-like protein 3
A6NJT0	0.62262	UNCX	UNC homeobox
A6NJV1	0.41845	FAM166C	Protein FAM166C (Family with sequence similarity 166 member C)
A6NJW4	0.63395	LRRC3C	leucine rich repeat containing 3C
A6NJW9	0.58709	CD8B2	CD8B family member 2
A6NJY1	0.44822	SLC9B1P1	solute carrier family 9 member B1 pseudogene 1
A6NJY4	0.7651	TMEM238L	transmembrane protein 238 like
A6NJZ3	0.61857	OR6C65	olfactory receptor family 6 subfamily C member 65
A6NJZ7	0.664887	RIMBP3C	RIMS binding protein 3C
A6NK02	0.535931	TRIM75	tripartite motif containing 75
A6NK06	0.33648	ACOD1	aconitate decarboxylase 1
A6NK44	0.70184	GLOD5	glyoxalase domain containing 5
A6NK53	0.367913	ZNF233	zinc finger protein 233
A6NK58	0.70804	LIPT2	lipoyl(octanoyl) transferase 2
A6NK59	0.52838	ASB14	ankyrin repeat and SOCS box containing 14
A6NK75	0.389595	ZNF98	zinc finger protein 98
A6NK89	0.747968	RASSF10	Ras association domain family member 10
A6NK97	0.69599	SLC22A20P	solute carrier family 22 member 20, pseudogene
A6NKB5	0.406444	PCNX2	pecanex 2
A6NKC9	0.43587	SH2D7	SH2 domain containing 7
A6NKD2	0.39942	TSPY2	testis specific protein Y-linked 2
A6NKD9	0.79736	CCDC85C	coiled-coil domain containing 85C
A6NKF1	0.52611	SAC3D1	SAC3 domain containing 1
A6NKF2	0.46744	ARID3C	AT-rich interaction domain 3C
A6NKG5	0.436097	RTL1	retrotransposon Gag like 1
A6NKH3	0.86759	RPL37AP8	ribosomal protein L37a pseudogene 8
A6NKK0	0.60042	OR5H1	olfactory receptor family 5 subfamily H member 1
A6NKL6	0.72597	TMEM200C	transmembrane protein 200C
A6NKP2	0.77779	SDR42E2	short chain dehydrogenase/reductase family 42E, member 2
A6NKQ9	0.34368	CGB1	chorionic gonadotropin subunit beta 1
A6NKT7	0.498144	RGPD3	RANBP2 like and GRIP domain containing 3
A6NKU9	0.53049	SPDYE3	speedy/RINGO cell cycle regulator family member E3
A6NKW6	0.40077	SHISAL2B	shisa like 2B
A6NKX4	0.75993	SLC22A31	solute carrier family 22 member 31
A6NL08	0.58215	OR6C75	olfactory receptor family 6 subfamily C member 75
A6NL26	0.58161	OR5B21	olfactory receptor family 5 subfamily B member 21
A6NL88	0.3623	SHISA7	shisa family member 7
A6NL99	0.43928	AQP7P3	aquaporin 7 pseudogene 3
A6NLC8	0.60242	TAF11L2	TATA-box binding protein associated factor 11 like 2
A6NLF2	0.50641
A6NLI5	0.414045	TRIM64C	tripartite motif containing 64C
A6NLJ0	0.55035	C2CD4B	C2 calcium dependent domain containing 4B
A6NLP5	0.78067	TTC36	tetratricopeptide repeat domain 36
A6NLU0	0.42696	RFPL4A	ret finger protein like 4A
A6NLU5	0.63217	VSTM2B	V-set and transmembrane domain containing 2B
A6NLW8	0.598355	DUXA	double homeobox A
A6NLX3	0.54309	SPDYE4	speedy/RINGO cell cycle regulator family member E4
A6NM03	0.62926	OR2AG2	olfactory receptor family 2 subfamily AG member 2
A6NM10	0.39705	AQP12B	aquaporin 12B
A6NM11	0.678375	LRRC37A2	leucine rich repeat containing 37 member A2
A6NM28	0.38884	ZFP92	ZFP92 zinc finger protein
A6NM36	0.80551	LRRC30	leucine rich repeat containing 30
A6NM43	0.79005	CCT8L1P	chaperonin containing TCP1 subunit 8 like 1, pseudogene
A6NM45	0.67312	CLDN24	claudin 24
A6NM62	0.77777	LRRC53	leucine rich repeat containing 53
A6NM76	0.61754	OR6C76	olfactory receptor family 6 subfamily C member 76
A6NMB1	0.482382	SIGLEC16	sialic acid binding Ig like lectin 16
A6NMB9	0.83355	FIGNL2	fidgetin like 2
A6NMD0	0.62843	IFITM10	interferon induced transmembrane protein 10
A6NMD2	0.851931	GOLGA8J	golgin A8 family member J
A6NMK7	0.325612	CPSF4L	cleavage and polyadenylation specific factor 4 like
A6NMK8	0.68606	INSYN2B	inhibitory synaptic factor family member 2B
A6NML5	0.64585	TMEM212	transmembrane protein 212
A6NMN3	0.38234	FAM170B	family with sequence similarity 170 member B
A6NMS3	0.59742	OR5K4	olfactory receptor family 5 subfamily K member 4
A6NMS7	0.680932	LRRC37A	leucine rich repeat containing 37A
A6NMT0	0.60542	DBX1	developing brain homeobox 1
A6NMU1	0.58777	OR52A4P	olfactory receptor family 52 subfamily A member 4 pseudogene
A6NMX2	0.42869	EIF4E1B	eukaryotic translation initiation factor 4E family member 1B
A6NMY6	0.4031	ANXA2P2	annexin A2 pseudogene 2
A6NMZ2	0.43876	SNTN	sentan, cilia apical structure protein
A6NMZ5	0.55674	OR4C45	olfactory receptor family 4 subfamily C member 45 (gene/pseudogene)
A6NMZ7	0.537181	COL6A6	collagen type VI alpha 6 chain
A6NN14	0.429383	ZNF729	zinc finger protein 729
A6NN73	0.868792	GOLGA8CP	golgin A8 family member C, pseudogene
A6NN90	0.78903	C2orf81	chromosome 2 open reading frame 81
A6NN92	0.60709	GJE1	gap junction protein epsilon 1
A6NNA2	0.70412	SRRM3	serine/arginine repetitive matrix 3
A6NNA5	0.61089	DRGX	dorsal root ganglia homeobox
A6NNB3	0.8516	IFITM5	interferon induced transmembrane protein 5
A6NND4	0.60297	OR2AT4	olfactory receptor family 2 subfamily AT member 4
A6NNE9	0.60818	MARCHF11	membrane associated ring-CH-type finger 11
A6NNF4	0.401309	ZNF726	zinc finger protein 726
A6NNL0	0.43727	NUTM2B	NUT family member 2B
A6NNL5	0.36293	C15orf61	chromosome 15 open reading frame 61
A6NNM3	0.625712	RIMBP3B	RIMS binding protein 3B
A6NNM8	0.53874	TTLL13	tubulin tyrosine ligase like 13
A6NNN8	0.41111	SLC38A8	solute carrier family 38 member 8
A6NNP5	0.75009	CCDC169	coiled-coil domain containing 169
A6NNS2	0.794	DHRS7C	dehydrogenase/reductase 7C
A6NNT2	0.857903	C16orf96	chromosome 16 open reading frame 96
A6NNV3	0.53474	SPDYE16	speedy/RINGO cell cycle regulator family member E16
A6NNW6	0.75654	ENO4	enolase 4
A6NNX1	0.46881	RIIAD1	regulatory subunit of type II PKA R-subunit domain containing 1
A6NNY8	0.34631	USP27X	ubiquitin specific peptidase 27 X-linked
A6NNZ2	0.61298	TUBB8B	tubulin beta 8B
A6NP11	0.418421	ZNF716	zinc finger protein 716
A6NP61	0.3676	ZAR1L	zygote arrest 1 like
A6PVC2	0.49829	TTLL8	tubulin tyrosine ligase like 8
A6PVI3	0.41228	NCBP2L	nuclear cap binding protein subunit 2 like
A6PVS8	0.631746	LRRIQ3	leucine rich repeats and IQ motif containing 3
A6QL63	0.397577	ABTB3	ankyrin repeat and BTB domain containing 3
A6QL64	0.703936	ANKRD36	ankyrin repeat domain 36
A6XGL0	0.50084	YJEFN3	YjeF N-terminal domain containing 3
A7E2F4	0.827971	GOLGA8A	golgin A8 family member A
A7E2S9	0.47462	ANKRD30BL	ankyrin repeat domain 30B like
A7E2U8	0.41569	C4orf47	UPF0602 protein C4orf47
A7E2V4	0.393931	ZSWIM8	zinc finger SWIM-type containing 8
A7E2Y1	0.497338	MYH7B	myosin heavy chain 7B
A7KAX9	0.438068	ARHGAP32	Rho GTPase activating protein 32
A7MBM2	0.377164	DISP2	dispatched RND transporter family member 2
A7MCY6	0.84572	TBKBP1	TBK1 binding protein 1
A7XYQ1	0.673797	SOBP	sine oculis binding protein homolog
A8K0R7	0.40204	ZNF839	zinc finger protein 839
A8K0S8	0.518295	MEIS3P2	Meis homeobox 3 pseudogene 2
A8K0Z3	0.55715	WASHC1	WASH complex subunit 1
A8K2U0	0.595232	A2ML1	alpha-2-macroglobulin like 1
A8K4G0	0.61948	CD300LB	CD300 molecule like family member b
A8K7I4	0.73791	CLCA1	chloride channel accessory 1
A8K855	0.358692	EFCAB7	EF-hand calcium binding domain 7
A8K8P3	0.588613	SFI1	SFI1 centrin binding protein
A8K8V0	0.30485	ZNF785	zinc finger protein 785
A8K979	0.636139	ERI2	ERI1 exoribonuclease family member 2
A8MPP1	0.8252	DDX11L8	DEAD/H-box helicase 11 like 8 (pseudogene)
A8MPS7	0.54594	YDJC	YdjC chitooligosaccharide deacetylase homolog
A8MPX8	0.32135	PP2D1	protein phosphatase 2C like domain containing 1
A8MPY1	0.36427	GABRR3	gamma-aminobutyric acid type A receptor subunit rho3
A8MQ14	0.403108	ZNF850	zinc finger protein 850
A8MQ27	0.52413	NEURL1B	neuralized E3 ubiquitin protein ligase 1B
A8MQT2	0.657064	GOLGA8B	golgin A8 family member B
A8MRT5	0.55882	NPIPB5	nuclear pore complex interacting protein family member B5
A8MSI8	0.5393	LYRM9	LYR motif containing 9
A8MT19	0.589504	RHPN2P1	rhophilin Rho GTPase binding protein 2 pseudogene 1
A8MT33	0.6725	SYCE1L	synaptonemal complex central element protein 1 like
A8MT65	0.426707	ZNF891	zinc finger protein 891
A8MT69	0.71293	CENPX	centromere protein X
A8MTA8	0.38589	FAM166B	Protein FAM166B
A8MTB9	0.58496	CEACAM18	CEA cell adhesion molecule 18
A8MTI9	0.35091	PRSS47P	serine protease 47, pseudogene
A8MTJ3	0.47116	GNAT3	G protein subunit alpha transducin 3
A8MTJ6	0.59488	FOXI3	forkhead box I3
A8MTL0	0.79891	IQCF5	IQ motif containing F5
A8MTL3	0.55762	RNF212B	ring finger protein 212B
A8MTL9	0.47044	HMSD	histocompatibility minor serpin domain containing
A8MTQ0	0.59066	NOTO	notochord homeobox
A8MTT3	0.52965	CEBPZOS	CEBPZ opposite strand
A8MTY0	0.388447	ZNF724	zinc finger protein 724
A8MTZ0	0.54544	BBIP1	BBSome interacting protein 1
A8MU46	0.49061	SMTNL1	smoothelin like 1
A8MUH7	0.365849	PDZK1P1	PDZ domain containing 1 pseudogene 1
A8MUK1	0.33844	USP17L5	ubiquitin specific peptidase 17 like family member 5
A8MUM7	0.51193	LGALS16	galectin 16
A8MUP2	0.71749	CSKMT	citrate synthase lysine methyltransferase
A8MUP6	0.6687	GSG1L2	GSG1 like 2
A8MUU1	0.4271	FABP5P3	fatty acid binding protein 5 pseudogene 3
A8MUV8	0.396147	ZNF727	zinc finger protein 727
A8MUX0	0.5745	KRTAP16-1	keratin associated protein 16-1
A8MUZ8	0.422633	ZNF705G	zinc finger protein 705G
A8MV23	0.3267	SERPINE3	serpin family E member 3
A8MV24	0.40765	C17orf98	Uncharacterized protein C17orf98
A8MV57	0.36032	MPTX1	mucosal pentraxin 1 (pseudogene)
A8MV65	0.38953	VGLL3	vestigial like family member 3
A8MV72	0.82826		Putative UPF0607 protein ENSP00000382826
A8MVJ9	0.35405		Putative histone PARylation factor 1-like
A8MVS1	0.438941
A8MVS5	0.63307	HIDE1	Protein HIDE1
A8MVU1	0.391962	NCF1C	neutrophil cytosolic factor 1C (pseudogene)
A8MVW0	0.38393	FAM171A2	family with sequence similarity 171 member A2
A8MVW5	0.4062	HEPACAM2	HEPACAM family member 2
A8MVX0	0.655586	ARHGEF33	Rho guanine nucleotide exchange factor 33
A8MVZ5	0.53974	BTNL10P	butyrophilin like 10, pseudogene
A8MW92	0.621291	PHF20L1	PHD finger protein 20 like 1
A8MW95	0.650099	BECN2	beclin 2
A8MW99	0.578092	MEI4	meiotic double-stranded break formation protein 4
A8MWA4	0.450159	ZNF705EP	zinc finger protein 705E, pseudogene
A8MWD9	0.79996	SNRPGP15	small nuclear ribonucleoprotein polypeptide G pseudogene 15
A8MWE9	0.51024	EFCAB8	EF-hand calcium binding domain 8
A8MWK0	0.3416	FADS2B	fatty acid desaturase 2B (pseudogene)
A8MWL6	0.63575		Putative synaptogyrin-2 like protein
A8MWX3	0.74576	WASH4P	WASP family homolog 4, pseudogene
A8MWY0	0.448091	ELAPOR2	endosome-lysosome associated apoptosis and autophagy regulator family member 2
A8MX76	0.335824	CAPN14	calpain 14
A8MXD5	0.4363	GRXCR1	glutaredoxin and cysteine rich domain containing 1
A8MXE2	0.49945	B3GALT9	beta-1,3-galactosyltransferase 9
A8MXK1	0.734839	VSTM5	V-set and transmembrane domain containing 5
A8MXQ7	0.507547	IQANK1	IQ motif and ankyrin repeat containing 1
A8MXT2	0.40597	MAGEB17	MAGE family member B17
A8MXV4	0.60652	NUDT19	nudix hydrolase 19
A8MXV6	0.89526	CDRT15L2	CMT1A duplicated region transcript 15 like 2
A8MXY4	0.403948	ZNF99	zinc finger protein 99
A8MY62	0.79782	LACTBL1	lactamase beta like 1
A8MYB1	0.844664	TMCO5B	transmembrane and coiled-coil domains 5B (pseudogene)
A8MYJ7	0.47596	TTC34	tetratricopeptide repeat domain 34
A8MYU2	0.362932	KCNU1	potassium calcium-activated channel subfamily U member 1
A8MYV0	0.616431	DCDC2C	doublecortin domain containing 2C
A8MYZ0	0.3392	MINDY4B	MINDY family member 4B
A8MYZ5	0.86334	IQCF6	IQ motif containing F6
A8MYZ6	0.61649	FOXO6	forkhead box O6
A8MZ26	0.49297	EFCAB9	EF-hand calcium binding domain 9
A8MZ36	0.681351	EVPLL	envoplakin like
A8MZ59	0.60022	LEUTX	leucine twenty homeobox
A8MZA4	0.766015	GOLGA6L6	golgin A6 family like 6
A8MZH6	0.56142	OOSP1	oocyte secreted protein 1
A8TX70	0.668509	COL6A5	collagen type VI alpha 5 chain
A9QM74	0.51457	KPNA7	karyopherin subunit alpha 7
A9UHW6	0.54504	MIF4GD	MIF4G domain containing
A9YTQ3	0.489	AHRR	aryl hydrocarbon receptor repressor
A9Z1Z3	0.314037	FER1L4	fer-1 like family member 4 (pseudogene)
B0FP48	0.48225	UPK3BL1	uroplakin 3B like 1
B0I1T2	0.375699	MYO1G	myosin IG
B0YJ81	0.48871	HACD1	3-hydroxyacyl-CoA dehydratase 1
B1AJZ9	0.690703	FHAD1	forkhead associated phosphopeptide binding domain 1
B1AK53	0.502564	ESPN	espin
B1AKI9	0.39504	ISM1	isthmin 1
B1AL46	0.44256	NUTM2E	NUT family member 2E
B1AL88	0.41801	NALF1	NALCN channel auxiliary factor 1
B1ANS9	0.672176	WDR64	WD repeat domain 64
B1APH4	0.470008	ZNF487	zinc finger protein 487
B2RC85	0.339966	RSPH10B2	radial spoke head 10 homolog B2
B2RD01	0.62676	CENPBD1P	CENPB DNA-binding domain containing 1, pseudogene
B2RN74	0.61085	OR11H12	olfactory receptor family 11 subfamily H member 12
B2RNN3	0.67852	C1QTNF9B	C1q and TNF related 9B
B2RPK0	0.476778	HMGB1P1	high mobility group box 1 pseudogene 1
B2RTY4	0.417926	MYO9A	myosin IXA
B2RU33	0.592985	POTEC	POTE ankyrin domain family member C
B2RUY7	0.332294	VWC2L	von Willebrand factor C domain containing 2 like
B2RV13	0.64796	CFAP97D1	CFAP97 domain containing 1
B2RXF0	0.37625	TMEM229A	transmembrane protein 229A
B2RXF5	0.39025	ZBTB42	zinc finger and BTB domain containing 42
B2RXH2	0.33975	KDM4E	lysine demethylase 4E
B2RXH4	0.38056	BTBD18	BTB domain containing 18
B2RXH8	0.56163	HNRNPCL2	heterogeneous nuclear ribonucleoprotein C like 2
B3GLJ2	0.39657	PATE3	prostate and testis expressed 3
B3KU38	0.545992	IQCJ-SCHIP1	IQCJ-SCHIP1 readthrough
B3SHH9	0.759	TMEM114	transmembrane protein 114
B4DH59	0.89126	NBPF26	NBPF member 26
B4DS77	0.35058	SHISA9	shisa family member 9
B4DU55	0.379092	ZNF879	zinc finger protein 879
B4DX44	0.388888	ZNF736	zinc finger protein 736
B4DXR9	0.407326	ZNF732	zinc finger protein 732
B4DZS4	0.42063	TCP11X1	t-complex 11 family, X-linked 1
B4E2M5	0.43235	ANKRD66	ankyrin repeat domain 66
B5MCN3	0.33036	SEC14L6	SEC14 like lipid binding 6
B5MCY1	0.38651	TDRD15	tudor domain containing 15
B5MD39	0.48868	GGTLC3	gamma-glutamyltransferase light chain family member 3
B5ME19	0.503876	EIF3CL	eukaryotic translation initiation factor 3 subunit C like
B6A8C7	0.4271	TARM1	T cell-interacting, activating receptor on myeloid cells 1
B6SEH8	0.75852	ERVV-1	endogenous retrovirus group V member 1, envelope
B6SEH9	0.596465	ERVV-2	endogenous retrovirus group V member 2, envelope
B7U540	0.35303	KCNJ18	potassium inwardly rectifying channel subfamily J member 18
B7Z1M9	0.54511	C2CD4D	C2 calcium dependent domain containing 4D
B7Z6K7	0.391636	ZNF814	zinc finger protein 814
B7Z8K6	0.54525	TRDC	T cell receptor delta constant
B7ZAQ6	0.46792	GPR89A	G protein-coupled receptor 89A
B7ZBB8	0.55698	PPP1R3G	protein phosphatase 1 regulatory subunit 3G
B7ZC32	0.407018	KIF28P	kinesin family member 28, pseudogene
B7ZLF3	0.39119	LOC728743	Zinc finger and SCAN domain-containing protein 2-like
B7ZW38	0.56124	HNRNPCL3	heterogeneous nuclear ribonucleoprotein C like 3
B8ZZ34	0.35676	SHISA8	shisa family member 8
B9A014	0.50626	C21orf140	chromosome 21 open reading frame 140
B9A064	0.56771	IGLL5	immunoglobulin lambda like polypeptide 5
B9A6J9	0.37364	TBC1D3L	TBC1 domain family member 3L
B9EJG8	0.75752	TMEM150C	transmembrane protein 150C
C4AMC7	0.56428	WASH3P	WASP family homolog 3, pseudogene
C9J069	0.394037	AJM1	apical junction component 1 homolog
C9J1S8	0.34623	TRIM49D1	tripartite motif containing 49D1
C9J202	0.45171	ALG1L2	ALG1 chitobiosyldiphosphodolichol beta-mannosyltransferase like 2
C9J2P7	0.34483	USP17L15	ubiquitin specific peptidase 17 like family member 15
C9J3I9	0.89719	C5orf58	chromosome 5 open reading frame 58
C9J6K1	0.42749	C19orf81	chromosome 19 open reading frame 81
C9J798	0.39016	RASA4B	RAS p21 protein activator 4B
C9JA33	0.517652	PALM2AKAP2	PALM2 and AKAP2 fusion
C9JBD0	0.54107	KRBOX1	KRAB box domain containing 1
C9JCN9	0.91037	HSBP1L1	heat shock factor binding protein 1 like 1
C9JDP6	0.67276	CLDN25	claudin 25
C9JE40	0.553827	PATL2	PAT1 homolog 2
C9JG80	0.52968	NPIPB4	nuclear pore complex interacting protein family member B4
C9JH25	0.66531	PRRT4	proline rich transmembrane protein 4
C9JI98	0.72296	TMEM238	transmembrane protein 238
C9JJ37	0.43997	BTBD19	BTB domain containing 19
C9JJH3	0.35114	USP17L10	ubiquitin specific peptidase 17 like family member 10
C9JL84	0.45883	HHLA1	HHLA1 neighbor of OC90
C9JLJ4	0.35032	USP17L13	ubiquitin specific peptidase 17 like family member 13
C9JLR9	0.455237	ZFTA	zinc finger translocation associated
C9JN71	0.364951	ZNF878	zinc finger protein 878
C9JPN9	0.34451	USP17L12	ubiquitin specific peptidase 17 like family member 12
C9JQI7	0.466296	TMEM232	transmembrane protein 232
C9JR72	0.49377	KBTBD13	kelch repeat and BTB domain containing 13
C9JRZ8	0.7677	AKR1B15	aldo-keto reductase family 1 member B15
C9JSJ3	0.45858	MEIOSIN	meiosis initiator
C9JTQ0	0.48445	ANKRD63	ankyrin repeat domain 63
C9JVI0	0.35179	USP17L11	ubiquitin specific peptidase 17 like family member 11
D3W0D1	0.37378	KLRF2	killer cell lectin like receptor F2
D6R901	0.35711	USP17L21	ubiquitin specific peptidase 17 like family member 21
D6R9N7	0.35272	USP17L18	ubiquitin specific peptidase 17 like family member 18
D6RA61	0.35752	USP17L22	ubiquitin specific peptidase 17 like family member 22
D6RBM5	0.42317	USP17L23	ubiquitin specific peptidase 17 like family member 23
D6RBQ6	0.35682	USP17L17	ubiquitin specific peptidase 17 like family member 17
D6RCP7	0.34556	USP17L19	ubiquitin specific peptidase 17 like family member 19
D6RF30	0.852582	GOLGA8K	golgin A8 family member K
D6RGH6	0.85951	MCIDAS	multiciliate differentiation and DNA synthesis associated cell cycle protein
D6RJB6	0.35733	USP17L20	ubiquitin specific peptidase 17 like family member 20
E2RYF6	0.609513	MUC22	mucin 22
E2RYF7	0.62202	HCG22	HLA complex group 22 (gene/pseudogene)
E5RG02	0.40457	PRSS46P	serine protease 46, pseudogene
E5RHQ5	0.44106	NPIPB11	nuclear pore complex interacting protein family member B11
E5RIL1	0.47864	UPK3BL2	uroplakin 3B like 2
E5RJM6	0.49749	ANKRD65	ankyrin repeat domain 65
E5RQL4	0.42102	FTCDNL1	formiminotransferase cyclodeaminase N-terminal like
E7ERA6	0.4442	RNF223	ring finger protein 223
E7ETH6	0.425104	ZNF587B	zinc finger protein 587B
E7EU14	0.67011
E9PAV3	0.50582	NACA	nascent polypeptide associated complex subunit alpha
E9PB15	0.61253	PTGES3L	prostaglandin E synthase 3 like
E9PGG2	0.43672	ANHX	anomalous homeobox
E9PI22	0.61435	PRR23D1	proline rich 23 domain containing 1
E9PIF3	0.837858	NPIPA2	nuclear pore complex interacting protein family member A2
E9PJI5	0.893644	NPIPA7	nuclear pore complex interacting protein family member A7
E9PKD4	0.848297	NPIPA5	nuclear pore complex interacting protein family member A5
E9PQ18	0.55893	XNDC1N	XRCC1 N-terminal domain containing 1, N-terminal like
E9PQ53	0.54996	NDUFC2-KCTD14	NDUFC2-KCTD14 readthrough
E9PQX1	0.7105	TMEM262	transmembrane protein 262
F2Z333	0.5148	FNDC10	fibronectin type III domain containing 10
F5GYI3	0.44478	UBAP1L	ubiquitin associated protein 1 like
F5H284	0.81402	PPIAL4D	peptidylprolyl isomerase A like 4D
F5H4B4	0.543537	FAM227A	family with sequence similarity 227 member A
F8VTS6	0.42762	RFPL4AL1	ret finger protein like 4A like 1
F8W0I5	0.46128	NPIPB12	nuclear pore complex interacting protein family member B12
F8WBI6	0.879568	GOLGA8N	golgin A8 family member N
F8WFD2	0.823067	NPIPA3	nuclear pore complex interacting protein family member A3
G2XKQ0	0.80937	SUMO1P1	SUMO1 pseudogene 1
G3V0H7	0.66814	SLCO1B7	solute carrier organic anion transporter family member 1B7 (putative)
G9CGD6	0.670144	CNK3/IPCEF1	CNK3/IPCEF1 fusion protein
H0UI37	0.43381	TSTD3	thiosulfate sulfurtransferase like domain containing 3
H0Y354	0.50513	FAM72C	family with sequence similarity 72 member C
H0Y7S4	0.59025	PRAMEF26	PRAME family member 26
H0YKK7	0.787833	GOLGA6L19	golgin A6 family like 19
H0YL14	0.67702	TMEM250	transmembrane protein 250
H0YM25	0.797147	GOLGA6L22	golgin A6 family like 22
H3BNL1	0.41578	C3orf84	chromosome 3 open reading frame 84
H3BNL8	0.61209	ARMH2	armadillo like helical domain containing 2
H3BPF8	0.874294	GOLGA8S	golgin A8 family member S
H3BPM6	0.32946	MKRN2OS	MKRN2 opposite strand
H3BQJ8	0.44013	LY6L	lymphocyte antigen 6 family member L
H3BQL2	0.840983	GOLGA8T	golgin A8 family member T
H3BRN8	0.37453	PIERCE2	piercer of microtubule wall 2
H3BS89	0.67576	TMEM178B	transmembrane protein 178B
H3BSY2	0.863554	GOLGA8M	golgin A8 family member M
H3BUK9	0.630502	POTEB2	POTE ankyrin domain family member B2
H3BV12	0.869217	GOLGA8Q	golgin A8 family member Q
H3BV60	0.52585	TGFBR3L	transforming growth factor beta receptor 3 like
H7BZ55	0.674541	CROCC2	ciliary rootlet coiled-coil, rootletin family member 2
H7C241	0.67202	CLDN34	claudin 34
H7C350	0.8481	CCDC188	coiled-coil domain containing 188
I1YAP6	0.426853	TRIM77	tripartite motif containing 77
I6L899	0.857499	GOLGA8R	golgin A8 family member R
J3QSS5	0.89183	TCP10L2	t-complex 10 like 2 (pseudogene)
K9M1U5	0.49404	IFNL4	interferon lambda 4 (gene/pseudogene)
L0R819	0.7121	ASDURF	ASNSD1 upstream open reading frame
M0QZC1	0.49505	RNF225	ring finger protein 225
M0R2J8	0.449049	DCDC1	doublecortin domain containing 1
M5A8F1	0.3631	ERVH48-1	endogenous retrovirus group 48 member 1, envelope
O00110	0.35301	OVOL3	ovo like zinc finger 3
O00115	0.38635	DNASE2	deoxyribonuclease 2, lysosomal
O00116	0.73759	AGPS	alkylglycerone phosphate synthase
O00124	0.76125	UBXN8	UBX domain protein 8
O00139	0.484469	KIF2A	kinesin family member 2A
O00141	0.50637	SGK1	serum/glucocorticoid regulated kinase 1
O00142	0.78593	TK2	thymidine kinase 2
O00144	0.516741	FZD9	frizzled class receptor 9
O00148	0.55155	DDX39A	DExD-box helicase 39A
O00151	0.470137	PDLIM1	PDZ and LIM domain 1
O00154	0.92617	ACOT7	acyl-CoA thioesterase 7
O00155	0.59754	GPR25	G protein-coupled receptor 25
O00159	0.409682	MYO1C	myosin IC
O00160	0.383011	MYO1F	myosin IF
O00161	0.47528	SNAP23	synaptosome associated protein 23
O00167	0.49367	EYA2	EYA transcriptional coactivator and phosphatase 2
O00170	0.51974	AIP	aryl hydrocarbon receptor interacting protein
O00175	0.4661	CCL24	C-C motif chemokine ligand 24
O00178	0.6864	GTPBP1	GTP binding protein 1
O00180	0.33515	KCNK1	potassium two pore domain channel subfamily K member 1
O00182	0.53909	LGALS9	galectin 9
O00186	0.33796	STXBP3	syntaxin binding protein 3
O00187	0.398593	MASP2	MBL associated serine protease 2
O00189	0.3932	AP4M1	adaptor related protein complex 4 subunit mu 1
O00192	0.50408	ARVCF	ARVCF delta catenin family member
O00194	0.90055	RAB27B	RAB27B, member RAS oncogene family
O00203	0.490238	AP3B1	adaptor related protein complex 3 subunit beta 1
O00204	0.41731	SULT2B1	sulfotransferase family 2B member 1
O00206	0.731772	TLR4	toll like receptor 4
O00212	0.88235	RHOD	ras homolog family member D
O00213	0.615536	APBB1	amyloid beta precursor protein binding family B member 1
O00214	0.54076	LGALS8	galectin 8
O00217	0.34657	NDUFS8	NADH:ubiquinone oxidoreductase core subunit S8
O00219	0.38509	HAS3	hyaluronan synthase 3
O00220	0.426754	TNFRSF10A	TNF receptor superfamily member 10a
O00221	0.54921	NFKBIE	NFKB inhibitor epsilon
O00222	0.50536	GRM8	glutamate metabotropic receptor 8
O00231	0.56636	PSMD11	proteasome 26S subunit, non-ATPase 11
O00232	0.56985	PSMD12	proteasome 26S subunit, non-ATPase 12
O00233	0.556333	PSMD9	proteasome 26S subunit, non-ATPase 9
O00237	0.381001	RNF103	ring finger protein 103
O00238	0.47133	BMPR1B	bone morphogenetic protein receptor type 1B
O00241	0.62067	SIRPB1	signal regulatory protein beta 1
O00244	0.77017	ATOX1	antioxidant 1 copper chaperone
O00254	0.63512	F2RL2	coagulation factor II thrombin receptor like 2
O00255	0.53184	MEN1	menin 1
O00257	0.429842	CBX4	chromobox 4
O00258	0.85705	GET1	guided entry of tail-anchored proteins factor 1
O00264	0.38656	PGRMC1	progesterone receptor membrane component 1
O00267	0.520858	SUPT5H	SPT5 homolog, DSIF elongation factor subunit
O00268	0.556557	TAF4	TATA-box binding protein associated factor 4
O00270	0.6459	GPR31	G protein-coupled receptor 31
O00273	0.626648	DFFA	DNA fragmentation factor subunit alpha
O00291	0.597333	HIP1	huntingtin interacting protein 1
O00292	0.39484	LEFTY2	left-right determination factor 2
O00294	0.58149	TULP1	TUB like protein 1
O00295	0.53282	TULP2	TUB like protein 2
O00299	0.40992	CLIC1	chloride intracellular channel 1
O00300	0.360868	TNFRSF11B	TNF receptor superfamily member 11b
O00303	0.596896	EIF3F	eukaryotic translation initiation factor 3 subunit F
O00305	0.46151	CACNB4	calcium voltage-gated channel auxiliary subunit beta 4
O00308	0.513408	WWP2	WW domain containing E3 ubiquitin protein ligase 2
O00311	0.48238	CDC7	cell division cycle 7
O00321	0.54664	ETV2	ETS variant transcription factor 2
O00322	0.47942	UPK1A	uroplakin 1A
O00327	0.450052	BMAL1	basic helix-loop-helix ARNT like 1
O00329	0.363556	PIK3CD	phosphatidylinositol-4,5-bisphosphate 3-kinase catalytic subunit delta
O00330	0.492189	PDHX	pyruvate dehydrogenase complex component X
O00337	0.550078	SLC28A1	solute carrier family 28 member 1
O00338	0.46057	SULT1C2	sulfotransferase family 1C member 2
O00339	0.697067	MATN2	matrilin 2
O00341	0.422225	SLC1A7	solute carrier family 1 member 7
O00358	0.57407	FOXE1	forkhead box E1
O00370	0.476678		LINE-1 retrotransposable element ORF2 protein (ORF2p) [Includes: Reverse transcriptase (EC 2.7.7.49); Endonuclease (EC 3.1.21.-)]
O00391	0.41178	QSOX1	quiescin sulfhydryl oxidase 1
O00398	0.5926	P2RY10	P2Y receptor family member 10
O00399	0.75641	DCTN6	dynactin subunit 6
O00400	0.74332	SLC33A1	solute carrier family 33 member 1
O00401	0.510779	WASL	WASP like actin nucleation promoting factor
O00408	0.645411	PDE2A	phosphodiesterase 2A
O00409	0.64617	FOXN3	forkhead box N3
O00410	0.35893	IPO5	importin 5
O00411	0.2654	POLRMT	RNA polymerase mitochondrial
O00418	0.38225	EEF2K	eukaryotic elongation factor 2 kinase
O00421	0.63429	CCRL2	C-C motif chemokine receptor like 2
O00422	0.50571	SAP18	Sin3A associated protein 18
O00423	0.41033	EML1	EMAP like 1
O00425	0.498156	IGF2BP3	insulin like growth factor 2 mRNA binding protein 3
O00429	0.47433	DNM1L	dynamin 1 like
O00442	0.90239	RTCA	RNA 3'-terminal phosphate cyclase
O00443	0.347181	PIK3C2A	phosphatidylinositol-4-phosphate 3-kinase catalytic subunit type 2 alpha
O00444	0.495788	PLK4	polo like kinase 4
O00445	0.5769	SYT5	synaptotagmin 5
O00451	0.36838	GFRA2	GDNF family receptor alpha 2
O00458	0.50107	IFRD1	interferon related developmental regulator 1
O00459	0.529807	PIK3R2	phosphoinositide-3-kinase regulatory subunit 2
O00461	0.701268	GOLIM4	golgi integral membrane protein 4
O00462	0.91845	MANBA	mannosidase beta
O00463	0.475028	TRAF5	TNF receptor associated factor 5
O00468	0.433843	AGRN	agrin
O00469	0.31427	PLOD2	procollagen-lysine,2-oxoglutarate 5-dioxygenase 2
O00470	0.551237	MEIS1	Meis homeobox 1
O00471	0.410908	EXOC5	exocyst complex component 5
O00472	0.489675	ELL2	elongation factor for RNA polymerase II 2
O00476	0.610712	SLC17A3	solute carrier family 17 member 3
O00478	0.561443	BTN3A3	butyrophilin subfamily 3 member A3
O00481	0.580766	BTN3A1	butyrophilin subfamily 3 member A1
O00482	0.422009	NR5A2	nuclear receptor subfamily 5 group A member 2
O00483	0.47892	NDUFA4	NDUFA4 mitochondrial complex associated
O00487	0.692582	PSMD14	proteasome 26S subunit, non-ATPase 14
O00488	0.35833	ZNF593	zinc finger protein 593
O00499	0.725015	BIN1	bridging integrator 1
O00501	0.69423	CLDN5	claudin 5
O00505	0.52595	KPNA3	karyopherin subunit alpha 3
O00506	0.543573	STK25	serine/threonine kinase 25
O00507	0.490611	USP9Y	ubiquitin specific peptidase 9 Y-linked
O00519	0.75192	FAAH	fatty acid amide hydrolase
O00522	0.402351	KRIT1	KRIT1 ankyrin repeat containing
O00526	0.62596	UPK2	uroplakin 2
O00533	0.464772	CHL1	cell adhesion molecule L1 like
O00534	0.30501	VWA5A	von Willebrand factor A domain containing 5A
O00541	0.379858	PES1	pescadillo ribosomal biogenesis factor 1
O00548	0.364389	DLL1	delta like canonical Notch ligand 1
O00555	0.424727	CACNA1A	calcium voltage-gated channel subunit alpha1 A
O00560	0.42535	SDCBP	syndecan binding protein
O00562	0.472695	PITPNM1	phosphatidylinositol transfer protein membrane associated 1
O00566	0.409876	MPHOSPH10	M-phase phosphoprotein 10
O00567	0.775196	NOP56	NOP56 ribonucleoprotein
O00570	0.43735	SOX1	SRY-box transcription factor 1
O00571	0.801657	DDX3X	DEAD-box helicase 3 X-linked
O00574	0.6049	CXCR6	C-X-C motif chemokine receptor 6
O00584	0.37552	RNASET2	ribonuclease T2
O00585	0.48918	CCL21	C-C motif chemokine ligand 21
O00587	0.56729	MFNG	MFNG O-fucosylpeptide 3-beta-N-acetylglucosaminyltransferase
O00590	0.59443	ACKR2	atypical chemokine receptor 2
O00591	0.37578	GABRP	gamma-aminobutyric acid type A receptor subunit pi
O00592	0.37209	PODXL	podocalyxin like
O00602	0.37122	FCN1	ficolin 1
O00622	0.353575	CCN1	cellular communication network factor 1
O00623	0.543871	PEX12	peroxisomal biogenesis factor 12
O00624	0.80917	SLC17A2	solute carrier family 17 member 2
O00625	0.90095	PIR	pirin
O00626	0.47031	CCL22	C-C motif chemokine ligand 22
O00628	0.74161	PEX7	peroxisomal biogenesis factor 7
O00629	0.52689	KPNA4	karyopherin subunit alpha 4
O00634	0.396158	NTN3	netrin 3
O00635	0.53958	TRIM38	tripartite motif containing 38
O00712	0.37802	NFIB	nuclear factor I B
O00716	0.585908	E2F3	E2F transcription factor 3
O00743	0.87318	PPP6C	protein phosphatase 6 catalytic subunit
O00744	0.38594	WNT10B	Wnt family member 10B
O00746	0.47082	NME4	NME/NM23 nucleoside diphosphate kinase 4
O00748	0.85712	CES2	carboxylesterase 2
O00750	0.356952	PIK3C2B	phosphatidylinositol-4-phosphate 3-kinase catalytic subunit type 2 beta
O00754	0.75227	MAN2B1	mannosidase alpha class 2B member 1
O00755	0.38258	WNT7A	Wnt family member 7A
O00757	0.74159	FBP2	fructose-bisphosphatase 2
O00762	0.74564	UBE2C	ubiquitin conjugating enzyme E2 C
O00763	0.642407	ACACB	acetyl-CoA carboxylase beta
O00764	0.7827	PDXK	pyridoxal kinase
O00767	0.34897	SCD	stearoyl-CoA desaturase
O14490	0.62978	DLGAP1	DLG associated protein 1
O14492	0.582541	SH2B2	SH2B adaptor protein 2
O14493	0.69123	CLDN4	claudin 4
O14494	0.49882	PLPP1	phospholipid phosphatase 1
O14495	0.50014	PLPP3	phospholipid phosphatase 3
O14497	0.422623	ARID1A	AT-rich interaction domain 1A
O14498	0.53012	ISLR	immunoglobulin superfamily containing leucine rich repeat
O14503	0.612566	BHLHE40	basic helix-loop-helix family member e40
O14508	0.39024	SOCS2	suppressor of cytokine signaling 2
O14511	0.666517	NRG2	neuregulin 2
O14512	0.42321	SOCS7	suppressor of cytokine signaling 7
O14513	0.822323	NCKAP5	NCK associated protein 5
O14514	0.490014	ADGRB1	adhesion G protein-coupled receptor B1
O14519	0.80247	CDK2AP1	cyclin dependent kinase 2 associated protein 1
O14520	0.44424	AQP7	aquaporin 7
O14521	0.61879	SDHD	succinate dehydrogenase complex subunit D
O14522	0.454435	PTPRT	protein tyrosine phosphatase receptor type T
O14523	0.472561	C2CD2L	C2CD2 like
O14524	0.346313	NEMP1	nuclear envelope integral membrane protein 1
O14525	0.347278	ASTN1	astrotactin 1
O14526	0.476404	FCHO1	FCH and mu domain containing endocytic adaptor 1
O14529	0.650115	CUX2	cut like homeobox 2
O14530	0.63185	TXNDC9	thioredoxin domain containing 9
O14531	0.82361	DPYSL4	dihydropyrimidinase like 4
O14543	0.44156	SOCS3	suppressor of cytokine signaling 3
O14544	0.41947	SOCS6	suppressor of cytokine signaling 6
O14545	0.433365	TRAFD1	TRAF-type zinc finger domain containing 1
O14548	0.54689	COX7A2L	cytochrome c oxidase subunit 7A2 like
O14556	0.84016	GAPDHS	glyceraldehyde-3-phosphate dehydrogenase, spermatogenic
O14558	0.655641	HSPB6	heat shock protein family B (small) member 6
O14559	0.427991	ARHGAP33	Rho GTPase activating protein 33
O14561	0.46981	NDUFAB1	NADH:ubiquinone oxidoreductase subunit AB1
O14562	0.647632	UBFD1	ubiquitin family domain containing 1
O14569	0.55525	CYB561D2	cytochrome b561 family member D2
O14576	0.72539	DYNC1I1	dynein cytoplasmic 1 intermediate chain 1
O14578	0.592236	CIT	citron rho-interacting serine/threonine kinase
O14579	0.51748	COPE	COPI coat complex subunit epsilon
O14581	0.6209	OR7A17	olfactory receptor family 7 subfamily A member 17
O14593	0.47533	RFXANK	regulatory factor X associated ankyrin containing protein
O14594	0.364501	NCAN	neurocan
O14595	0.55583	CTDSP2	CTD small phosphatase 2
O14602	0.80244	EIF1AY	eukaryotic translation initiation factor 1A Y-linked
O14607	0.466926	UTY	ubiquitously transcribed tetratricopeptide repeat containing, Y-linked
O14610	0.51824	GNGT2	G protein subunit gamma transducin 2
O14617	0.498006	AP3D1	adaptor related protein complex 3 subunit delta 1
O14618	0.46294	CCS	copper chaperone for superoxide dismutase
O14625	0.48739	CXCL11	C-X-C motif chemokine ligand 11
O14626	0.61061	GPR171	G protein-coupled receptor 171
O14627	0.56642	CDX4	caudal type homeobox 4
O14628	0.386383	ZNF195	zinc finger protein 195
O14638	0.42248	ENPP3	ectonucleotide pyrophosphatase/phosphodiesterase 3
O14639	0.34744	ABLIM1	actin binding LIM protein 1
O14640	0.535368	DVL1	dishevelled segment polarity protein 1
O14641	0.532975	DVL2	dishevelled segment polarity protein 2
O14645	0.50547	DNALI1	dynein axonemal light intermediate chain 1
O14646	0.575308	CHD1	chromodomain helicase DNA binding protein 1
O14647	0.561821	CHD2	chromodomain helicase DNA binding protein 2
O14649	0.33599	KCNK3	potassium two pore domain channel subfamily K member 3
O14653	0.7929	GOSR2	golgi SNAP receptor complex member 2
O14654	0.39297	IRS4	insulin receptor substrate 4
O14656	0.61151	TOR1A	torsin family 1 member A
O14657	0.59425	TOR1B	torsin family 1 member B
O14662	0.582632	STX16	syntaxin 16
O14668	0.49585	PRRG1	proline rich and Gla domain 1
O14672	0.358728	ADAM10	ADAM metallopeptidase domain 10
O14678	0.78165	ABCD4	ATP binding cassette subfamily D member 4
O14681	0.61344	EI24	EI24 autophagy associated transmembrane protein
O14682	0.57218	ENC1	ectodermal-neural cortex 1
O14683	0.79709	TP53I11	tumor protein p53 inducible protein 11
O14684	0.53286	PTGES	prostaglandin E synthase
O14709	0.415102	ZNF197	zinc finger protein 197
O14713	0.61747	ITGB1BP1	integrin subunit beta 1 binding protein 1
O14715	0.487648	RGPD8	RANBP2 like and GRIP domain containing 8
O14717	0.44308	TRDMT1	tRNA aspartic acid methyltransferase 1
O14718	0.63878	RRH	retinal pigment epithelium-derived rhodopsin homolog
O14727	0.668818	APAF1	apoptotic peptidase activating factor 1
O14730	0.775938	RIOK3	RIO kinase 3
O14732	0.81767	IMPA2	inositol monophosphatase 2
O14733	0.54229	MAP2K7	mitogen-activated protein kinase kinase 7
O14734	0.59372	ACOT8	acyl-CoA thioesterase 8
O14735	0.61083	CDIPT	CDP-diacylglycerol--inositol 3-phosphatidyltransferase
O14737	0.61886	PDCD5	programmed cell death 5
O14744	0.36537	PRMT5	protein arginine methyltransferase 5
O14745	0.410296	SLC9A3R1	Na(+)/H(+) exchange regulatory cofactor NHE-RF1 (NHERF-1) (Ezrin-radixin-moesin-binding phosphoprotein 50) (EBP50) (Regulatory cofactor of Na(+)/H(+) exchanger) (Sodium-hydrogen exchanger regulatory factor 1) (Solute carrier family 9 isoform A3 regulatory factor 1)
O14746	0.388308	TERT	telomerase reverse transcriptase
O14753	0.4306	OVOL1	ovo like transcriptional repressor 1
O14756	0.76485	HSD17B6	hydroxysteroid 17-beta dehydrogenase 6
O14757	0.598351	CHEK1	checkpoint kinase 1
O14763	0.423894	TNFRSF10B	TNF receptor superfamily member 10b
O14764	0.36773	GABRD	gamma-aminobutyric acid type A receptor subunit delta
O14770	0.558642	MEIS2	Meis homeobox 2
O14771	0.387006	ZNF213	zinc finger protein 213
O14772	0.45288	FPGT	fucose-1-phosphate guanylyltransferase
O14773	0.32699	TPP1	tripeptidyl peptidase 1
O14775	0.73184	GNB5	G protein subunit beta 5
O14776	0.524921	TCERG1	transcription elongation regulator 1
O14777	0.692015	NDC80	NDC80 kinetochore complex component
O14782	0.501408	KIF3C	kinesin family member 3C
O14786	0.606705	NRP1	neuropilin 1
O14787	0.40361	TNPO2	transportin 2
O14788	0.67275	TNFSF11	TNF superfamily member 11
O14791	0.613131	APOL1	apolipoprotein L1
O14792	0.47623	HS3ST1	heparan sulfate-glucosamine 3-sulfotransferase 1
O14793	0.64729	MSTN	myostatin
O14795	0.477652	UNC13B	unc-13 homolog B
O14796	0.4538	SH2D1B	SH2 domain containing 1B
O14798	0.32705	TNFRSF10C	TNF receptor superfamily member 10c
O14802	0.88969	POLR3A	RNA polymerase III subunit A
O14804	0.58023	TAAR5	trace amine associated receptor 5
O14807	0.91027	MRAS	muscle RAS oncogene homolog
O14813	0.60117	PHOX2A	paired like homeobox 2A
O14815	0.32285	CAPN9	calpain 9
O14817	0.43098	TSPAN4	tetraspanin 4
O14818	0.89301	PSMA7	proteasome 20S subunit alpha 7
O14827	0.428499	RASGRF2	Ras protein specific guanine nucleotide releasing factor 2
O14828	0.62605	SCAMP3	secretory carrier membrane protein 3
O14829	0.748637	PPEF1	protein phosphatase with EF-hand domain 1
O14830	0.557765	PPEF2	protein phosphatase with EF-hand domain 2
O14832	0.37274	PHYH	phytanoyl-CoA 2-hydroxylase
O14836	0.38296	TNFRSF13B	TNF receptor superfamily member 13B
O14841	0.337533	OPLAH	5-oxoprolinase, ATP-hydrolysing
O14842	0.61998	FFAR1	free fatty acid receptor 1
O14843	0.64999	FFAR3	free fatty acid receptor 3
O14862	0.517031	AIM2	absent in melanoma 2
O14863	0.84229	SLC30A4	solute carrier family 30 member 4
O14867	0.49789	BACH1	BTB domain and CNC homolog 1
O14874	0.46557	BCKDK	branched chain keto acid dehydrogenase kinase
O14879	0.46207	IFIT3	interferon induced protein with tetratricopeptide repeats 3
O14880	0.49472	MGST3	microsomal glutathione S-transferase 3
O14893	0.4745	GEMIN2	gem nuclear organelle associated protein 2
O14894	0.65991	TM4SF5	transmembrane 4 L six family member 5
O14896	0.428948	IRF6	interferon regulatory factor 6
O14901	0.38312	KLF11	KLF transcription factor 11
O14904	0.39752	WNT9A	Wnt family member 9A
O14907	0.37278	TAX1BP3	Tax1 binding protein 3
O14908	0.36473	GIPC1	GIPC PDZ domain containing family member 1
O14910	0.507959	LIN7A	lin-7 homolog A, crumbs cell polarity complex component
O14917	0.478411	PCDH17	protocadherin 17
O14920	0.28755	IKBKB	inhibitor of nuclear factor kappa B kinase subunit beta
O14921	0.44391	RGS13	regulator of G protein signaling 13
O14924	0.473445	RGS12	regulator of G protein signaling 12
O14925	0.59164	TIMM23	translocase of inner mitochondrial membrane 23
O14926	0.31658	FSCN2	fascin actin-bundling protein 2, retinal
O14929	0.35204	HAT1	histone acetyltransferase 1
O14931	0.60974	NCR3	natural cytotoxicity triggering receptor 3
O14933	0.77532	UBE2L6	ubiquitin conjugating enzyme E2 L6
O14936	0.542128	CASK	calcium/calmodulin dependent serine protein kinase
O14939	0.32434	PLD2	phospholipase D2
O14948	0.48963	TFEC	transcription factor EC
O14949	0.47654	UQCRQ	ubiquinol-cytochrome c reductase complex III subunit VII
O14950	0.49712	MYL12B	myosin light chain 12B
O14957	0.51506	UQCR11	ubiquinol-cytochrome c reductase, complex III subunit XI
O14958	0.37131	CASQ2	calsequestrin 2
O14960	0.41624	LECT2	leukocyte cell derived chemotaxin 2
O14964	0.59877	HGS	hepatocyte growth factor-regulated tyrosine kinase substrate
O14965	0.60424	AURKA	aurora kinase A
O14966	0.90807	RAB29	RAB29, member RAS oncogene family
O14967	0.54898	CLGN	calmegin
O14972	0.38919	VPS26C	VPS26 endosomal protein sorting factor C
O14974	0.555814	PPP1R12A	protein phosphatase 1 regulatory subunit 12A
O14975	0.916092	SLC27A2	solute carrier family 27 member 2
O14976	0.449234	GAK	cyclin G associated kinase
O14977	0.76043	AZIN1	antizyme inhibitor 1
O14978	0.389495	ZNF263	zinc finger protein 263
O14979	0.564706	HNRNPDL	heterogeneous nuclear ribonucleoprotein D like
O14980	0.53033	XPO1	exportin 1
O14981	0.558293	BTAF1	B-TFIID TATA-box binding protein associated factor 1
O14983	0.7947	ATP2A1	ATPase sarcoplasmic/endoplasmic reticulum Ca2+ transporting 1
O14986	0.41688	PIP5K1B	phosphatidylinositol-4-phosphate 5-kinase type 1 beta
O14990	0.52355	PPP1R2C	PPP1R2C family member C
O14994	0.77833	SYN3	synapsin III
O15013	0.75501	ARHGEF10	Rho guanine nucleotide exchange factor 10
O15014	0.6472	ZNF609	zinc finger protein 609
O15016	0.447505	TRIM66	tripartite motif containing 66
O15020	0.53203	SPTBN2	spectrin beta, non-erythrocytic 2
O15021	0.536521	MAST4	microtubule associated serine/threonine kinase family member 4
O15027	0.42172	SEC16A	SEC16 homolog A, endoplasmic reticulum export factor
O15031	0.481199	PLXNB2	plexin B2
O15033	0.392405	AREL1	apoptosis resistant E3 ubiquitin protein ligase 1
O15034	0.546323	RIMBP2	RIMS binding protein 2
O15037	0.483752	KHNYN	KH and NYN domain containing
O15040	0.521515	TECPR2	tectonin beta-propeller repeat containing 2
O15041	0.39996	SEMA3E	semaphorin 3E
O15042	0.559667	U2SURP	U2 snRNP associated SURP domain containing
O15047	0.626493	SETD1A	SET domain containing 1A, histone lysine methyltransferase
O15049	0.901578	N4BP3	NEDD4 binding protein 3
O15054	0.426126	KDM6B	lysine demethylase 6B
O15055	0.406309	PER2	period circadian regulator 2
O15056	0.26463	SYNJ2	synaptojanin 2
O15060	0.407365	ZBTB39	zinc finger and BTB domain containing 39
O15061	0.810077	SYNM	synemin
O15062	0.394031	ZBTB5	zinc finger and BTB domain containing 5
O15063	0.411492	GARRE1	granule associated Rac and RHOG effector 1
O15066	0.504785	KIF3B	kinesin family member 3B
O15067	0.26732	PFAS	phosphoribosylformylglycinamidine synthase
O15068	0.384314	MCF2L	MCF.2 cell line derived transforming sequence like
O15069	0.420183	NACAD	NAC alpha domain containing
O15072	0.374986	ADAMTS3	ADAM metallopeptidase with thrombospondin type 1 motif 3
O15075	0.613713	DCLK1	doublecortin like kinase 1
O15078	0.684338	CEP290	centrosomal protein 290
O15079	0.76231	SNPH	syntaphilin
O15083	0.776769	ERC2	ELKS/RAB6-interacting/CAST family member 2
O15084	0.35921	ANKRD28	ankyrin repeat domain 28
O15085	0.474912	ARHGEF11	Rho guanine nucleotide exchange factor 11
O15090	0.436022	ZNF536	zinc finger protein 536
O15091	0.38917	PRORP	protein only RNase P catalytic subunit
O15105	0.33474	SMAD7	SMAD family member 7
O15111	0.28931	CHUK	component of inhibitor of nuclear factor kappa B kinase complex
O15116	0.55254	LSM1	LSM1 homolog, mRNA degradation associated
O15117	0.478053	FYB1	FYN binding protein 1
O15118	0.366161	NPC1	NPC intracellular cholesterol transporter 1
O15119	0.46883	TBX3	T-box transcription factor 3
O15120	0.71588	AGPAT2	1-acylglycerol-3-phosphate O-acyltransferase 2
O15121	0.35787	DEGS1	delta 4-desaturase, sphingolipid 1
O15123	0.533261	ANGPT2	angiopoietin 2
O15126	0.60493	SCAMP1	secretory carrier membrane protein 1
O15127	0.62552	SCAMP2	secretory carrier membrane protein 2
O15131	0.50759	KPNA5	karyopherin subunit alpha 5
O15143	0.73677	ARPC1B	actin related protein 2/3 complex subunit 1B
O15144	0.34336	ARPC2	actin related protein 2/3 complex subunit 2
O15145	0.46114	ARPC3	actin related protein 2/3 complex subunit 3
O15146	0.488049	MUSK	muscle associated receptor tyrosine kinase
O15151	0.483255	MDM4	MDM4 regulator of p53
O15155	0.86209	BET1	Bet1 golgi vesicular membrane trafficking protein
O15156	0.35951	ZBTB7B	zinc finger and BTB domain containing 7B
O15160	0.71674	POLR1C	RNA polymerase I and III subunit C
O15162	0.71702	PLSCR1	phospholipid scramblase 1
O15164	0.536089	TRIM24	tripartite motif containing 24
O15169	0.548383	AXIN1	axin 1
O15173	0.39175	PGRMC2	progesterone receptor membrane component 2
O15178	0.49196	TBXT	T-box transcription factor T
O15182	0.38874	CETN3	centrin 3
O15194	0.55737	CTDSPL	CTD small phosphatase like
O15195	0.299173	VILL	villin like
O15197	0.456374	EPHB6	EPH receptor B6
O15198	0.3615	SMAD9	SMAD family member 9
O15204	0.41724	ADAMDEC1	ADAM like decysin 1
O15205	0.82339	UBD	ubiquitin D
O15209	0.376899	ZBTB22	zinc finger and BTB domain containing 22
O15211	0.392932	RGL2	ral guanine nucleotide dissociation stimulator like 2
O15212	0.83497	PFDN6	prefoldin subunit 6
O15213	0.59658	WDR46	WD repeat domain 46
O15217	0.39366	GSTA4	glutathione S-transferase alpha 4
O15218	0.63351	GPR182	G protein-coupled receptor 182
O15226	0.521657	NKRF	NFKB repressing factor
O15228	0.34509	GNPAT	glyceronephosphate O-acyltransferase
O15229	0.74197	KMO	kynurenine 3-monooxygenase
O15231	0.49809	ZNF185	zinc finger protein 185 with LIM domain
O15232	0.7801	MATN3	matrilin 3
O15234	0.3128	CASC3	CASC3 exon junction complex subunit
O15235	0.62506	MRPS12	mitochondrial ribosomal protein S12
O15239	0.46791	NDUFA1	NADH:ubiquinone oxidoreductase subunit A1
O15240	0.88555	VGF	VGF nerve growth factor inducible
O15243	0.56318	LEPROT	leptin receptor overlapping transcript
O15244	0.76309	SLC22A2	solute carrier family 22 member 2
O15245	0.78255	SLC22A1	solute carrier family 22 member 1
O15247	0.39813	CLIC2	chloride intracellular channel 2
O15254	0.52692	ACOX3	acyl-CoA oxidase 3, pristanoyl
O15258	0.42175	RER1	retention in endoplasmic reticulum sorting receptor 1
O15259	0.43369	NPHP1	nephrocystin 1
O15260	0.44856	SURF4	surfeit 4
O15264	0.48113	MAPK13	mitogen-activated protein kinase 13
O15265	0.51831	ATXN7	ataxin 7
O15266	0.58502	SHOX	SHOX homeobox
O15269	0.8929	SPTLC1	serine palmitoyltransferase long chain base subunit 1
O15270	0.77876	SPTLC2	serine palmitoyltransferase long chain base subunit 2
O15273	0.42011	TCAP	titin-cap
O15287	0.43303	FANCG	FA complementation group G
O15294	0.512975	OGT	O-linked N-acetylglucosamine (GlcNAc) transferase
O15296	0.37467	ALOX15B	arachidonate 15-lipoxygenase type B
O15297	0.365019	PPM1D	protein phosphatase, Mg2+/Mn2+ dependent 1D
O15303	0.446738	GRM6	glutamate metabotropic receptor 6
O15304	0.65435	SIVA1	SIVA1 apoptosis inducing factor
O15305	0.48439	PMM2	phosphomannomutase 2
O15315	0.80574	RAD51B	RAD51 paralog B
O15318	0.40902	POLR3G	RNA polymerase III subunit G
O15321	0.30696	TM9SF1	transmembrane 9 superfamily member 1
O15327	0.27402	INPP4B	inositol polyphosphate-4-phosphatase type II B
O15335	0.77761	CHAD	chondroadherin
O15342	0.6349	ATP6V0E1	ATPase H+ transporting V0 subunit e1
O15344	0.472203	MID1	midline 1
O15347	0.473893	HMGB3	high mobility group box 3
O15350	0.503814	TP73	tumor protein p73
O15353	0.67172	FOXN1	forkhead box N1
O15354	0.63326	GPR37	G protein-coupled receptor 37
O15355	0.3822	PPM1G	protein phosphatase, Mg2+/Mn2+ dependent 1G
O15357	0.597458	INPPL1	inositol polyphosphate phosphatase like 1
O15360	0.434579	FANCA	FA complementation group A
O15370	0.44344	SOX12	SRY-box transcription factor 12
O15371	0.37364	EIF3D	eukaryotic translation initiation factor 3 subunit D
O15372	0.47994	EIF3H	eukaryotic translation initiation factor 3 subunit H
O15374	0.86617	SLC16A4	solute carrier family 16 member 4
O15375	0.86147	SLC16A5	solute carrier family 16 member 5
O15379	0.88147	HDAC3	histone deacetylase 3
O15381	0.866686	NVL	nuclear VCP like
O15382	0.89113	BCAT2	branched chain amino acid transaminase 2
O15389	0.516803	SIGLEC5	sialic acid binding Ig like lectin 5
O15391	0.32919	YY2	YY2 transcription factor
O15392	0.48385	BIRC5	baculoviral IAP repeat containing 5
O15393	0.3423	TMPRSS2	transmembrane serine protease 2
O15394	0.534787	NCAM2	neural cell adhesion molecule 2
O15397	0.549725	IPO8	importin 8
O15399	0.525883	GRIN2D	glutamate ionotropic receptor NMDA type subunit 2D
O15400	0.597816	STX7	syntaxin 7
O15403	0.8645	SLC16A6	solute carrier family 16 member 6
O15405	0.724011	TOX3	TOX high mobility group box family member 3
O15409	0.691699	FOXP2	forkhead box P2
O15427	0.86719	SLC16A3	solute carrier family 16 member 3
O15431	0.53714	SLC31A1	solute carrier family 31 member 1
O15432	0.57886	SLC31A2	solute carrier family 31 member 2
O15438	0.443685	ABCC3	ATP binding cassette subfamily C member 3
O15439	0.43276	ABCC4	ATP binding cassette subfamily C member 4
O15440	0.44485	ABCC5	ATP binding cassette subfamily C member 5
O15442	0.57577	MPPED1	metallophosphoesterase domain containing 1
O15444	0.47573	CCL25	C-C motif chemokine ligand 25
O15446	0.40598	POLR1G	RNA polymerase I subunit G
O15455	0.579053	TLR3	toll like receptor 3
O15457	0.568148	MSH4	mutS homolog 4
O15460	0.74571	P4HA2	prolyl 4-hydroxylase subunit alpha 2
O15466	0.48636	ST8SIA5	ST8 alpha-N-acetyl-neuraminide alpha-2,8-sialyltransferase 5
O15467	0.52132	CCL16	C-C motif chemokine ligand 16
O15479	0.548487	MAGEB2	MAGE family member B2
O15480	0.38738	MAGEB3	MAGE family member B3
O15481	0.419	MAGEB4	MAGE family member B4
O15482	0.752416	TEX28	testis expressed 28
O15484	0.33622	CAPN5	calpain 5
O15488	0.61585	GYG2	glycogenin 2
O15492	0.44543	RGS16	regulator of G protein signaling 16
O15496	0.39583	PLA2G10	phospholipase A2 group X
O15498	0.56278	YKT6	YKT6 v-SNARE homolog
O15499	0.61366	GSC2	goosecoid homeobox 2
O15503	0.46446	INSIG1	insulin induced gene 1
O15504	0.50064	NUP42	nucleoporin 42
O15511	0.45598	ARPC5	actin related protein 2/3 complex subunit 5
O15514	0.72742	POLR2D	RNA polymerase II subunit D
O15516	0.70051	CLOCK	clock circadian regulator
O15519	0.507133	CFLAR	CASP8 and FADD like apoptosis regulator
O15520	0.3828	FGF10	fibroblast growth factor 10
O15522	0.59415	NKX2-8	NK2 homeobox 8
O15523	0.792379	DDX3Y	DEAD-box helicase 3 Y-linked
O15524	0.38176	SOCS1	suppressor of cytokine signaling 1
O15525	0.71777	MAFG	MAF bZIP transcription factor G
O15527	0.5029	OGG1	8-oxoguanine DNA glycosylase
O15528	0.31519	CYP27B1	cytochrome P450 family 27 subfamily B member 1
O15529	0.64987	GPR42	G protein-coupled receptor 42
O15530	0.571402	PDPK1	3-phosphoinositide dependent protein kinase 1
O15533	0.43123	TAPBP	TAP binding protein
O15534	0.412963	PER1	period circadian regulator 1
O15535	0.420983	ZSCAN9	zinc finger and SCAN domain containing 9
O15537	0.55718	RS1	retinoschisin 1
O15539	0.47426	RGS5	regulator of G protein signaling 5
O15540	0.47474	FABP7	fatty acid binding protein 7
O15541	0.517128	RNF113A	ring finger protein 113A
O15547	0.29264	P2RX6	purinergic receptor P2X 6
O15550	0.451425	KDM6A	lysine demethylase 6A
O15551	0.70132	CLDN3	claudin 3
O15552	0.61422	FFAR2	free fatty acid receptor 2
O15553	0.544558	MEFV	MEFV innate immunity regulator, pyrin
O15554	0.517613	KCNN4	potassium calcium-activated channel subfamily N member 4
O43143	0.622266	DHX15	DEAH-box helicase 15
O43147	0.412874	SGSM2	small G protein signaling modulator 2
O43148	0.66691	RNMT	RNA guanine-7 methyltransferase
O43150	0.56214	ASAP2	ArfGAP with SH3 domain, ankyrin repeat and PH domain 2
O43151	0.330515	TET3	tet methylcytosine dioxygenase 3
O43155	0.749304	FLRT2	fibronectin leucine rich transmembrane protein 2
O43156	0.557037	TTI1	TELO2 interacting protein 1
O43157	0.439599	PLXNB1	plexin B1
O43159	0.65245	RRP8	ribosomal RNA processing 8
O43164	0.59645	PJA2	praja ring finger ubiquitin ligase 2
O43166	0.344936	SIPA1L1	signal induced proliferation associated 1 like 1
O43167	0.403074	ZBTB24	zinc finger and BTB domain containing 24
O43169	0.39974	CYB5B	cytochrome b5 type B
O43172	0.686404	PRPF4	pre-mRNA processing factor 4
O43173	0.55599	ST8SIA3	ST8 alpha-N-acetyl-neuraminide alpha-2,8-sialyltransferase 3
O43174	0.30591	CYP26A1	cytochrome P450 family 26 subfamily A member 1
O43175	0.93854	PHGDH	phosphoglycerate dehydrogenase
O43181	0.3702	NDUFS4	NADH:ubiquinone oxidoreductase subunit S4
O43182	0.39295	ARHGAP6	Rho GTPase activating protein 6
O43184	0.361548	ADAM12	ADAM metallopeptidase domain 12
O43186	0.57804	CRX	cone-rod homeobox
O43187	0.535251	IRAK2	interleukin 1 receptor associated kinase 2
O43189	0.35898	PHF1	PHD finger protein 1
O43193	0.60514	MLNR	motilin receptor
O43194	0.60246	GPR39	G protein-coupled receptor 39
O43196	0.564168	MSH5	mutS homolog 5
O43236	0.52187	SEPTIN4	septin 4
O43237	0.69535	DYNC1LI2	dynein cytoplasmic 1 light intermediate chain 2
O43240	0.35581	KLK10	kallikrein related peptidase 10
O43242	0.50169	PSMD3	proteasome 26S subunit, non-ATPase 3
O43246	0.33433	SLC7A4	solute carrier family 7 member 4
O43248	0.56727	HOXC11	homeobox C11
O43251	0.60161	RBFOX2	RNA binding fox-1 homolog 2
O43252	0.87559	PAPSS1	3'-phosphoadenosine 5'-phosphosulfate synthase 1
O43255	0.37417	SIAH2	siah E3 ubiquitin protein ligase 2
O43257	0.42752	ZNHIT1	zinc finger HIT-type containing 1
O43264	0.395741	ZW10	zw10 kinetochore protein
O43272	0.42652	PRODH	proline dehydrogenase 1
O43278	0.37998	SPINT1	serine peptidase inhibitor, Kunitz type 1
O43280	0.49576	TREH	trehalase
O43281	0.6533	EFS	embryonal Fyn-associated substrate
O43283	0.588199	MAP3K13	mitogen-activated protein kinase kinase kinase 13
O43286	0.552867	B4GALT5	beta-1,4-galactosyltransferase 5
O43290	0.508829	SART1	spliceosome associated factor 1, recruiter of U4/U6.U5 tri-snRNP
O43291	0.368576	SPINT2	serine peptidase inhibitor, Kunitz type 2
O43292	0.39202	GPAA1	glycosylphosphatidylinositol anchor attachment 1
O43293	0.687744	DAPK3	death associated protein kinase 3
O43294	0.363849	TGFB1I1	transforming growth factor beta 1 induced transcript 1
O43295	0.403398	SRGAP3	SLIT-ROBO Rho GTPase activating protein 3
O43296	0.408819	ZNF264	zinc finger protein 264
O43298	0.413423	ZBTB43	zinc finger and BTB domain containing 43
O43299	0.40572	AP5Z1	adaptor related protein complex 5 subunit zeta 1
O43300	0.7633	LRRTM2	leucine rich repeat transmembrane neuronal 2
O43301	0.66672	HSPA12A	heat shock protein family A (Hsp70) member 12A
O43303	0.640773	CCP110	centriolar coiled-coil protein 110
O43304	0.53302	SEC14L5	SEC14 like lipid binding 5
O43306	0.353431	ADCY6	adenylate cyclase 6
O43307	0.387421	ARHGEF9	Cdc42 guanine nucleotide exchange factor 9
O43309	0.379164	ZSCAN12	zinc finger and SCAN domain containing 12
O43310	0.47735	CTIF	cap binding complex dependent translation initiation factor
O43312	0.53483	MTSS1	MTSS I-BAR domain containing 1
O43313	0.428134	ATMIN	ATM interactor
O43314	0.435386	PPIP5K2	diphosphoinositol pentakisphosphate kinase 2
O43315	0.43005	AQP9	aquaporin 9
O43316	0.648647	PAX4	paired box 4
O43318	0.600037	MAP3K7	mitogen-activated protein kinase kinase kinase 7
O43320	0.37368	FGF16	fibroblast growth factor 16
O43323	0.450405	DHH	desert hedgehog signaling molecule
O43324	0.39825	EEF1E1	eukaryotic translation elongation factor 1 epsilon 1
O43325	0.52573	LYRM1	LYR motif containing 1
O43345	0.428877	ZNF208	zinc finger protein 208
O43347	0.565587	MSI1	musashi RNA binding protein 1
O43353	0.568267	RIPK2	receptor interacting serine/threonine kinase 2
O43361	0.417456	ZNF749	zinc finger protein 749
O43364	0.60161	HOXA2	homeobox A2
O43365	0.5905	HOXA3	homeobox A3
O43374	0.38632	RASA4	RAS p21 protein activator 4
O43379	0.395454	WDR62	WD repeat domain 62
O43390	0.461528	HNRNPR	heterogeneous nuclear ribonucleoprotein R
O43395	0.50012	PRPF3	pre-mRNA processing factor 3
O43396	0.700571	TXNL1	thioredoxin like 1
O43402	0.68421	EMC8	ER membrane protein complex subunit 8
O43405	0.683305	COCH	cochlin
O43414	0.69717	ERI3	ERI1 exoribonuclease family member 3
O43422	0.465501	THAP12	THAP domain containing 12
O43423	0.68881	ANP32C	Acidic leucine-rich nuclear phosphoprotein 32 family member C (Phosphoprotein 32-related protein 1) (Tumorigenic protein pp32r1)
O43424	0.497823	GRID2	glutamate ionotropic receptor delta type subunit 2
O43426	0.26968	SYNJ1	synaptojanin 1
O43427	0.33284	FIBP	FGF1 intracellular binding protein
O43432	0.505899	EIF4G3	eukaryotic translation initiation factor 4 gamma 3
O43435	0.4531	TBX1	T-box transcription factor 1
O43439	0.694603	CBFA2T2	CBFA2/RUNX1 partner transcriptional co-repressor 2
O43447	0.77773	PPIH	peptidylprolyl isomerase H
O43448	0.87809	KCNAB3	potassium voltage-gated channel subfamily A regulatory beta subunit 3
O43451	0.302814	MGAM	maltase-glucoamylase
O43462	0.55081	MBTPS2	membrane bound transcription factor peptidase, site 2
O43463	0.5352	SUV39H1	SUV39H1 histone lysine methyltransferase
O43464	0.38094	HTRA2	HtrA serine peptidase 2
O43474	0.38574	KLF4	KLF transcription factor 4
O43482	0.56216	OIP5	Opa interacting protein 5
O43488	0.85679	AKR7A2	aldo-keto reductase family 7 member A2
O43490	0.41278	PROM1	prominin 1
O43491	0.389835	EPB41L2	erythrocyte membrane protein band 4.1 like 2
O43497	0.24082	CACNA1G	calcium voltage-gated channel subunit alpha1 G
O43502	0.775092	RAD51C	RAD51 paralog C
O43504	0.7211	LAMTOR5	late endosomal/lysosomal adaptor, MAPK and MTOR activator 5
O43505	0.534388	B4GAT1	beta-1,4-glucuronyltransferase 1
O43506	0.357778	ADAM20	ADAM metallopeptidase domain 20
O43508	0.71687	TNFSF12	TNF superfamily member 12
O43511	0.44762	SLC26A4	solute carrier family 26 member 4
O43513	0.475477	MED7	mediator complex subunit 7
O43520	0.637515	ATP8B1	ATPase phospholipid transporting 8B1
O43524	0.62227	FOXO3	forkhead box O3
O43525	0.507237	KCNQ3	potassium voltage-gated channel subfamily Q member 3
O43526	0.512132	KCNQ2	potassium voltage-gated channel subfamily Q member 2
O43529	0.35217	CHST10	carbohydrate sulfotransferase 10
O43541	0.3305	SMAD6	SMAD family member 6
O43542	0.801054	XRCC3	X-ray repair cross complementing 3
O43543	0.809	XRCC2	X-ray repair cross complementing 2
O43548	0.32399	TGM5	transglutaminase 5
O43556	0.37058	SGCE	sarcoglycan epsilon
O43557	0.70722	TNFSF14	TNF superfamily member 14
O43559	0.6581	FRS3	fibroblast growth factor receptor substrate 3
O43566	0.438239	RGS14	regulator of G protein signaling 14
O43567	0.553982	RNF13	ring finger protein 13
O43570	0.34095	CA12	carbonic anhydrase 12
O43572	0.34954	AKAP10	A-kinase anchoring protein 10
O43581	0.56283	SYT7	synaptotagmin 7
O43583	0.73555	DENR	density regulated re-initiation and release factor
O43586	0.613907	PSTPIP1	proline-serine-threonine phosphatase interacting protein 1
O43592	0.41815	XPOT	exportin for tRNA
O43593	0.312555	HR	HR lysine demethylase and nuclear receptor corepressor
O43597	0.41433	SPRY2	sprouty RTK signaling antagonist 2
O43598	0.71052	DNPH1	2'-deoxynucleoside 5'-phosphate N-hydrolase 1
O43602	0.614729	DCX	doublecortin
O43603	0.63936	GALR2	galanin receptor 2
O43609	0.43208	SPRY1	sprouty RTK signaling antagonist 1
O43610	0.40248	SPRY3	sprouty RTK signaling antagonist 3
O43613	0.60021	HCRTR1	hypocretin receptor 1
O43614	0.61143	HCRTR2	hypocretin receptor 2
O43615	0.52176	TIMM44	translocase of inner mitochondrial membrane 44
O43617	0.75044	TRAPPC3	trafficking protein particle complex subunit 3
O43623	0.3995	SNAI2	snail family transcriptional repressor 2
O43633	0.73367	CHMP2A	charged multivesicular body protein 2A
O43638	0.57022	FOXS1	forkhead box S1
O43639	0.547183	NCK2	NCK adaptor protein 2
O43653	0.41369	PSCA	prostate stem cell antigen
O43657	0.47337	TSPAN6	tetraspanin 6
O43660	0.74679	PLRG1	pleiotropic regulator 1
O43663	0.59091	PRC1	protein regulator of cytokinesis 1
O43665	0.46281	RGS10	regulator of G protein signaling 10
O43670	0.41025	ZNF207	zinc finger protein 207
O43674	0.36255	NDUFB5	NADH:ubiquinone oxidoreductase subunit B5
O43676	0.51055	NDUFB3	NADH:ubiquinone oxidoreductase subunit B3
O43677	0.69556	NDUFC1	NADH:ubiquinone oxidoreductase subunit C1
O43678	0.56307	NDUFA2	NADH:ubiquinone oxidoreductase subunit A2
O43679	0.50621	LDB2	LIM domain binding 2
O43680	0.56243	TCF21	transcription factor 21
O43681	0.90021	GET3	guided entry of tail-anchored proteins factor 3, ATPase
O43683	0.552539	BUB1	BUB1 mitotic checkpoint serine/threonine kinase
O43684	0.75184	BUB3	BUB3 mitotic checkpoint protein
O43688	0.50241	PLPP2	phospholipid phosphatase 2
O43692	0.36828	PI15	peptidase inhibitor 15
O43699	0.42817	SIGLEC6	sialic acid binding Ig like lectin 6
O43704	0.41402	SULT1B1	sulfotransferase family 1B member 1
O43707	0.460625	ACTN4	actinin alpha 4
O43708	0.44253	GSTZ1	glutathione S-transferase zeta 1
O43709	0.88778	BUD23	BUD23 rRNA methyltransferase and ribosome maturation factor
O43711	0.57681	TLX3	T cell leukemia homeobox 3
O43715	0.49683	TRIAP1	TP53 regulated inhibitor of apoptosis 1
O43716	0.5342	GATC	glutamyl-tRNA amidotransferase subunit C
O43719	0.533375	HTATSF1	HIV-1 Tat specific factor 1
O43731	0.41072	KDELR3	KDEL endoplasmic reticulum protein retention receptor 3
O43734	0.68833	TRAF3IP2	TRAF3 interacting protein 2
O43736	0.40498	ITM2A	integral membrane protein 2A
O43739	0.61431	CYTH3	cytohesin 3
O43741	0.487032	PRKAB2	protein kinase AMP-activated non-catalytic subunit beta 2
O43745	0.38371	CHP2	calcineurin like EF-hand protein 2
O43747	0.527758	AP1G1	adaptor related protein complex 1 subunit gamma 1
O43749	0.61225	OR1F1	olfactory receptor family 1 subfamily F member 1
O43752	0.686363	STX6	syntaxin 6
O43759	0.63808	SYNGR1	synaptogyrin 1
O43760	0.60627	SYNGR2	synaptogyrin 2
O43761	0.65797	SYNGR3	synaptogyrin 3
O43763	0.68277	TLX2	T cell leukemia homeobox 2
O43765	0.734256	SGTA	small glutamine rich tetratricopeptide repeat co-chaperone alpha
O43766	0.61783	LIAS	lipoic acid synthetase
O43772	0.4538	SLC25A20	solute carrier family 25 member 20
O43776	0.813892	NARS1	asparaginyl-tRNA synthetase 1
O43781	0.45949	DYRK3	dual specificity tyrosine phosphorylation regulated kinase 3
O43790	0.807113	KRT86	keratin 86
O43791	0.504506	SPOP	speckle type BTB/POZ protein
O43795	0.386813	MYO1B	myosin IB
O43805	0.86974	SSNA1	SS nuclear autoantigen 1
O43808	0.46363	SLC25A17	solute carrier family 25 member 17
O43809	0.53161	NUDT21	nudix hydrolase 21
O43812	0.613759	DUX1	double homeobox 1
O43813	0.47959	LANCL1	LanC like glutathione S-transferase 1
O43815	0.739389	STRN	striatin
O43818	0.76234	RRP9	ribosomal RNA processing 9, U3 small nucleolar RNA binding protein
O43819	0.57553	SCO2	synthesis of cytochrome C oxidase 2
O43820	0.50608	HYAL3	hyaluronidase 3
O43822	0.64344	CFAP410	cilia and flagella associated protein 410
O43823	0.36703	AKAP8	A-kinase anchoring protein 8
O43824	0.41495	GTPBP6	GTP binding protein 6 (putative)
O43825	0.53197	B3GALT2	beta-1,3-galactosyltransferase 2
O43826	0.85389	SLC37A4	solute carrier family 37 member 4
O43827	0.498028	ANGPTL7	angiopoietin like 7
O43829	0.32703	ZBTB14	zinc finger and BTB domain containing 14
O43837	0.85916	IDH3B	isocitrate dehydrogenase (NAD(+)) 3 non-catalytic subunit beta
O43847	0.28035	NRDC	nardilysin convertase
O43852	0.34013	CALU	calumenin
O43854	0.330706	EDIL3	EGF like repeats and discoidin domains 3
O43861	0.680072	ATP9B	ATPase phospholipid transporting 9B (putative)
O43865	0.89711	AHCYL1	adenosylhomocysteinase like 1
O43866	0.374822	CD5L	CD5 molecule like
O43868	0.572791	SLC28A2	solute carrier family 28 member 2
O43869	0.61698	OR2T1	olfactory receptor family 2 subfamily T member 1
O43889	0.71623	CREB3	cAMP responsive element binding protein 3
O43895	0.49526	XPNPEP2	X-prolyl aminopeptidase 2
O43896	0.436577	KIF1C	kinesin family member 1C
O43897	0.471152	TLL1	tolloid like 1
O43900	0.370248	PRICKLE3	prickle planar cell polarity protein 3
O43903	0.40942	GAS2	growth arrest specific 2
O43909	0.472693	EXTL3	exostosin like glycosyltransferase 3
O43913	0.692623	ORC5	origin recognition complex subunit 5
O43915	0.35398	VEGFD	vascular endothelial growth factor D
O43916	0.41398	CHST1	carbohydrate sulfotransferase 1
O43918	0.525564	AIRE	autoimmune regulator
O43920	0.4261	NDUFS5	NADH:ubiquinone oxidoreductase subunit S5
O43921	0.48295	EFNA2	ephrin A2
O43924	0.53713	PDE6D	phosphodiesterase 6D
O43927	0.48832	CXCL13	C-X-C motif chemokine ligand 13
O43929	0.739343	ORC4	origin recognition complex subunit 4
O43930	0.6194	PRKY	protein kinase Y-linked (pseudogene)
O43933	0.77774	PEX1	peroxisomal biogenesis factor 1
O43934	0.80099	MFSD11	major facilitator superfamily domain containing 11
O60216	0.589478	RAD21	RAD21 cohesin complex component
O60218	0.76758	AKR1B10	aldo-keto reductase family 1 member B10
O60220	0.53406	TIMM8A	translocase of inner mitochondrial membrane 8A
O60224	0.49818	SSX4	SSX family member 4
O60225	0.50942	SSX5	SSX family member 5
O60231	0.600662	DHX16	DEAH-box helicase 16
O60232	0.691195	ZNRD2	zinc ribbon domain containing 2
O60234	0.52645	GMFG	glia maturation factor gamma
O60235	0.32492	TMPRSS11D	transmembrane serine protease 11D
O60237	0.557413	PPP1R12B	protein phosphatase 1 regulatory subunit 12B
O60239	0.47503	SH3BP5	SH3 domain binding protein 5
O60240	0.624777	PLIN1	perilipin 1
O60241	0.51672	ADGRB2	adhesion G protein-coupled receptor B2
O60242	0.493376	ADGRB3	adhesion G protein-coupled receptor B3
O60243	0.34783	HS6ST1	heparan sulfate 6-O-sulfotransferase 1
O60244	0.368582	MED14	mediator complex subunit 14
O60245	0.507009	PCDH7	protocadherin 7
O60248	0.43307	SOX15	SRY-box transcription factor 15
O60256	0.85183	PRPSAP2	phosphoribosyl pyrophosphate synthetase associated protein 2
O60258	0.34369	FGF17	fibroblast growth factor 17
O60259	0.35507	KLK8	kallikrein related peptidase 8
O60260	0.408359	PRKN	parkin RBR E3 ubiquitin protein ligase
O60262	0.50453	GNG7	G protein subunit gamma 7
O60264	0.648745	SMARCA5	SWI/SNF related, matrix associated, actin dependent regulator of chromatin, subfamily a, member 5
O60266	0.37807	ADCY3	adenylate cyclase 3
O60268	0.45606	KIAA0513	KIAA0513
O60271	0.666174	SPAG9	sperm associated antigen 9
O60279	0.39049	SUSD5	sushi domain containing 5
O60282	0.626103	KIF5C	kinesin family member 5C
O60284	0.625872	ST18	ST18 C2H2C-type zinc finger transcription factor
O60285	0.57067	NUAK1	NUAK family kinase 1
O60287	0.446623	URB1	URB1 ribosome biogenesis homolog
O60290	0.508812	ZNF862	zinc finger protein 862
O60291	0.31779	MGRN1	mahogunin ring finger 1
O60292	0.331201	SIPA1L3	signal induced proliferation associated 1 like 3
O60293	0.488193	ZFC3H1	zinc finger C3H1-type containing
O60294	0.36683	LCMT2	leucine carboxyl methyltransferase 2
O60296	0.742814	TRAK2	trafficking kinesin protein 2
O60299	0.841886	LZTS3	leucine zipper tumor suppressor family member 3
O60303	0.402081	KATNIP	katanin interacting protein
O60304	0.404412	ZNF500	zinc finger protein 500
O60306	0.46385	AQR	aquarius intron-binding spliceosomal factor
O60307	0.521498	MAST3	microtubule associated serine/threonine kinase 3
O60308	0.53608	CEP104	centrosomal protein 104
O60309	0.67608	LRRC37A3	leucine rich repeat containing 37 member A3
O60312	0.669559	ATP10A	ATPase phospholipid transporting 10A (putative)
O60313	0.46267	OPA1	OPA1 mitochondrial dynamin like GTPase
O60315	0.53863	ZEB2	zinc finger E-box binding homeobox 2
O60318	0.41204	MCM3AP	minichromosome maintenance complex component 3 associated protein
O60320	0.60135	ENTREP2	endosomal transmembrane epsin interactor 2
O60330	0.438678	PCDHGA12	protocadherin gamma subfamily A, 12
O60331	0.41412	PIP5K1C	phosphatidylinositol-4-phosphate 5-kinase type 1 gamma
O60333	0.392126	KIF1B	kinesin family member 1B
O60336	0.406773	MAPKBP1	mitogen-activated protein kinase binding protein 1
O60337	0.51849	MARCHF6	membrane associated ring-CH-type finger 6
O60341	0.53149	KDM1A	lysine demethylase 1A
O60343	0.483313	TBC1D4	TBC1 domain family member 4
O60346	0.383937	PHLPP1	PH domain and leucine rich repeat protein phosphatase 1
O60347	0.33119	TBC1D12	TBC1 domain family member 12
O60353	0.500409	FZD6	frizzled class receptor 6
O60359	0.74622	CACNG3	calcium voltage-gated channel auxiliary subunit gamma 3
O60361	0.44377	NME2P1	NME2 pseudogene 1
O60381	0.439071	HBP1	HMG-box transcription factor 1
O60383	0.3464	GDF9	growth differentiation factor 9
O60391	0.513062	GRIN3B	glutamate ionotropic receptor NMDA type subunit 3B
O60393	0.62686	NOBOX	NOBOX oogenesis homeobox
O60403	0.60775	OR10H2	olfactory receptor family 10 subfamily H member 2
O60404	0.57103	OR10H3	olfactory receptor family 10 subfamily H member 3
O60412	0.61111	OR7C2	olfactory receptor family 7 subfamily C member 2
O60422	0.38064	ONECUT3	one cut homeobox 3
O60423	0.655817	ATP8B3	ATPase phospholipid transporting 8B3
O60427	0.3406	FADS1	fatty acid desaturase 1
O60431	0.62159	OR1I1	olfactory receptor family 1 subfamily I member 1
O60437	0.521076	PPL	periplakin
O60443	0.385809	GSDME	gasdermin E
O60447	0.491328	EVI5	ecotropic viral integration site 5
O60449	0.351808	LY75	lymphocyte antigen 75
O60462	0.590863	NRP2	neuropilin 2
O60469	0.55976	DSCAM	DS cell adhesion molecule
O60476	0.54659	MAN1A2	mannosidase alpha class 1A member 2
O60477	0.431349	BRINP1	BMP/retinoic acid inducible neural specific 1
O60478	0.69416	GPR137B	G protein-coupled receptor 137B
O60479	0.58948	DLX3	distal-less homeobox 3
O60481	0.37685	ZIC3	Zic family member 3
O60486	0.556038	PLXNC1	plexin C1
O60487	0.733874	MPZL2	myelin protein zero like 2
O60488	0.734496	ACSL4	acyl-CoA synthetase long chain family member 4
O60493	0.45164	SNX3	sorting nexin 3
O60496	0.658214	DOK2	docking protein 2
O60499	0.5953	STX10	syntaxin 10
O60500	0.544791	NPHS1	NPHS1 adhesion molecule, nephrin
O60502	0.65462	OGA	O-GlcNAcase
O60503	0.360947	ADCY9	adenylate cyclase 9
O60504	0.58588	SORBS3	sorbin and SH3 domain containing 3
O60506	0.464844	SYNCRIP	synaptotagmin binding cytoplasmic RNA interacting protein
O60507	0.40932	TPST1	tyrosylprotein sulfotransferase 1
O60508	0.607644	CDC40	cell division cycle 40
O60512	0.51719	B4GALT3	beta-1,4-galactosyltransferase 3
O60513	0.55342	B4GALT4	beta-1,4-galactosyltransferase 4
O60516	0.35992	EIF4EBP3	eukaryotic translation initiation factor 4E binding protein 3
O60518	0.529328	RANBP6	RAN binding protein 6
O60519	0.78453	CREBL2	cAMP responsive element binding protein like 2
O60522	0.418701	TDRD6	tudor domain containing 6
O60524	0.769805	NEMF	nuclear export mediator factor
O60542	0.35281	PSPN	persephin
O60543	0.69573	CIDEA	cell death inducing DFFA like effector a
O60547	0.86652	GMDS	GDP-mannose 4,6-dehydratase
O60548	0.57088	FOXD2	forkhead box D2
O60551	0.56875	NMT2	N-myristoyltransferase 2
O60563	0.36641	CCNT1	cyclin T1
O60565	0.39032	GREM1	gremlin 1, DAN family BMP antagonist
O60566	0.549732	BUB1B	BUB1 mitotic checkpoint serine/threonine kinase B
O60568	0.55786	PLOD3	procollagen-lysine,2-oxoglutarate 5-dioxygenase 3
O60573	0.43735	EIF4E2	eukaryotic translation initiation factor 4E family member 2
O60575	0.42732	SPINK4	serine peptidase inhibitor Kazal type 4
O60583	0.36854	CCNT2	cyclin T2
O60602	0.56867	TLR5	toll like receptor 5
O60603	0.568807	TLR2	toll like receptor 2
O60609	0.38436	GFRA3	GDNF family receptor alpha 3
O60610	0.59983	DIAPH1	diaphanous related formin 1
O60635	0.43195	TSPAN1	tetraspanin 1
O60636	0.5186	TSPAN2	tetraspanin 2
O60637	0.45629	TSPAN3	tetraspanin 3
O60641	0.46928	SNAP91	synaptosome associated protein 91
O60645	0.360551	EXOC3	exocyst complex component 3
O60656	0.54604	UGT1A9	UDP glucuronosyltransferase family 1 member A9
O60658	0.484441	PDE8A	phosphodiesterase 8A
O60662	0.39415	KLHL41	kelch like family member 41
O60663	0.442106	LMX1B	LIM homeobox transcription factor 1 beta
O60664	0.553744	PLIN3	perilipin 3
O60667	0.667855	FCMR	Fc mu receptor
O60669	0.86342	SLC16A7	solute carrier family 16 member 7
O60671	0.8099	RAD1	RAD1 checkpoint DNA exonuclease
O60674	0.586644	JAK2	Janus kinase 2
O60675	0.70829	MAFK	MAF bZIP transcription factor K
O60676	0.41919	CST8	cystatin 8
O60678	0.456976	PRMT3	protein arginine methyltransferase 3
O60682	0.6185	MSC	musculin
O60683	0.532534	PEX10	peroxisomal biogenesis factor 10
O60684	0.51462	KPNA6	karyopherin subunit alpha 6
O60687	0.36361	SRPX2	sushi repeat containing protein X-linked 2
O60688	0.55112	YPEL1	yippee like 1
O60701	0.88749	UGDH	UDP-glucose 6-dehydrogenase
O60704	0.40657	TPST2	tyrosylprotein sulfotransferase 2
O60706	0.37169	ABCC9	ATP binding cassette subfamily C member 9
O60711	0.33985	LPXN	leupaxin
O60716	0.4996	CTNND1	catenin delta 1
O60721	0.74162	SLC24A1	solute carrier family 24 member 1
O60725	0.59183	ICMT	isoprenylcysteine carboxyl methyltransferase
O60729	0.36872	CDC14B	cell division cycle 14B
O60732	0.401125	MAGEC1	MAGE family member C1
O60733	0.35851	PLA2G6	phospholipase A2 group VI
O60739	0.79771	EIF1B	eukaryotic translation initiation factor 1B
O60741	0.366019	HCN1	hyperpolarization activated cyclic nucleotide gated potassium channel 1
O60749	0.56942	SNX2	sorting nexin 2
O60755	0.64628	GALR3	galanin receptor 3
O60759	0.45692	CYTIP	cytohesin 1 interacting protein
O60760	0.42083	HPGDS	hematopoietic prostaglandin D synthase
O60762	0.85366	DPM1	dolichyl-phosphate mannosyltransferase subunit 1, catalytic
O60763	0.619887	USO1	USO1 vesicle transport factor
O60765	0.387528	ZNF354A	zinc finger protein 354A
O60774	0.51763	FMO6P	flavin containing dimethylaniline monoxygenase 6, pseudogene
O60779	0.82047	SLC19A2	solute carrier family 19 member 2
O60783	0.43595	MRPS14	mitochondrial ribosomal protein S14
O60784	0.594208	TOM1	target of myb1 membrane trafficking protein
O60806	0.46498	TBX19	T-box transcription factor 19
O60809	0.59567	PRAMEF10	PRAME family member 10
O60810	0.59695	PRAMEF4	PRAME family member 4
O60811	0.59819	PRAMEF2	PRAME family member 2
O60812	0.5609	HNRNPCL1	heterogeneous nuclear ribonucleoprotein C like 1
O60813	0.59353	PRAMEF11	PRAME family member 11
O60814	0.64694	H2BC12	H2B clustered histone 12
O60825	0.42481	PFKFB2	6-phosphofructo-2-kinase/fructose-2,6-biphosphatase 2
O60826	0.631485	CCDC22	coiled-coil domain containing 22
O60828	0.42824	PQBP1	polyglutamine binding protein 1
O60830	0.45808	TIMM17B	translocase of inner mitochondrial membrane 17B
O60831	0.5873	PRAF2	PRA1 domain family member 2
O60832	0.88217	DKC1	dyskerin pseudouridine synthase 1
O60840	0.283495	CACNA1F	calcium voltage-gated channel subunit alpha1 F
O60841	0.634698	EIF5B	eukaryotic translation initiation factor 5B
O60844	0.36444	ZG16	zymogen granule protein 16
O60858	0.4461	TRIM13	tripartite motif containing 13
O60861	0.570223	GAS7	growth arrest specific 7
O60869	0.43708	EDF1	endothelial differentiation related factor 1
O60870	0.525204	KIN	Kin17 DNA and RNA binding protein
O60879	0.80899	DIAPH2	diaphanous related formin 2
O60880	0.46352	SH2D1A	SH2 domain containing 1A
O60882	0.481367	MMP20	matrix metallopeptidase 20
O60883	0.62848	GPR37L1	G protein-coupled receptor 37 like 1
O60884	0.775853	DNAJA2	DnaJ heat shock protein family (Hsp40) member A2
[truncated: 16,234 more rows]

## Sheet: Hsapiens_to_Ca_Psyntrophicum
UniProt ID	Structural Conservative Scores	Gene Symbol	Gene Full Name
A0A024RBG1	0.66989	NUDT4B	nudix hydrolase 4B
A0A075B6H5	0.56799	TRBV20OR9-2	T cell receptor beta variable 20/OR9-2 (non-functional)
A0A075B6H7	0.59236	IGKV3-7	immunoglobulin kappa variable 3-7 (non-functional)
A0A075B6H8	0.59445	IGKV1D-42	immunoglobulin kappa variable 1D-42 (non-functional)
A0A075B6H9	0.60066	IGLV4-69	immunoglobulin lambda variable 4-69
A0A075B6I0	0.56378	IGLV8-61	immunoglobulin lambda variable 8-61
A0A075B6I1	0.60688	IGLV4-60	immunoglobulin lambda variable 4-60
A0A075B6I3	0.57823	IGLV11-55	immunoglobulin lambda variable 11-55 (non-functional)
A0A075B6I4	0.57901	IGLV10-54	immunoglobulin lambda variable 10-54
A0A075B6I6	0.57771	IGLV1-50	immunoglobulin lambda variable 1-50 (non-functional)
A0A075B6I7	0.50391	IGLV5-48	immunoglobulin lambda variable 5-48 (non-functional)
A0A075B6I9	0.57747	IGLV7-46	immunoglobulin lambda variable 7-46
A0A075B6J1	0.57682	IGLV5-37	immunoglobulin lambda variable 5-37
A0A075B6J2	0.57666	IGLV2-33	immunoglobulin lambda variable 2-33 (non-functional)
A0A075B6J6	0.57187	IGLV3-22	immunoglobulin lambda variable 3-22
A0A075B6J9	0.58018	IGLV2-18	immunoglobulin lambda variable 2-18
A0A075B6K0	0.58508	IGLV3-16	immunoglobulin lambda variable 3-16
A0A075B6K2	0.57814	IGLV3-12	immunoglobulin lambda variable 3-12
A0A075B6K4	0.58482	IGLV3-10	immunoglobulin lambda variable 3-10
A0A075B6K5	0.57861	IGLV3-9	immunoglobulin lambda variable 3-9
A0A075B6K6	0.60815	IGLV4-3	immunoglobulin lambda variable 4-3
A0A075B6L2	0.60504	TRGV11	T cell receptor gamma variable 11 (non-functional)
A0A075B6L6	0.57833	TRBV7-3	T cell receptor beta variable 7-3
A0A075B6N1	0.56702	TRBV19	T cell receptor beta variable 19
A0A075B6N2	0.56647	TRBV20-1	T cell receptor beta variable 20-1
A0A075B6N3	0.55806	TRBV24-1	T cell receptor beta variable 24-1
A0A075B6N4	0.55881	TRBV25-1	T cell receptor beta variable 25-1
A0A075B6P5	0.589	IGKV2-28	immunoglobulin kappa variable 2-28
A0A075B6Q5	0.59001	IGHV3-64	immunoglobulin heavy variable 3-64
A0A075B6R0	0.56027	TRGV2	T cell receptor gamma variable 2
A0A075B6R2	0.62118	IGHV4-4	immunoglobulin heavy variable 4-4
A0A075B6R9	0.59592	IGKV2D-24	immunoglobulin kappa variable 2D-24 (non-functional)
A0A075B6S2	0.58936	IGKV2D-29	immunoglobulin kappa variable 2D-29
A0A075B6S4	0.60282	IGKV1D-17	immunoglobulin kappa variable 1D-17
A0A075B6S5	0.59781	IGKV1-27	immunoglobulin kappa variable 1-27
A0A075B6S6	0.59813	IGKV2D-30	immunoglobulin kappa variable 2D-30
A0A075B6S9	0.58916	IGKV1-37	immunoglobulin kappa variable 1-37 (non-functional)
A0A075B6T6	0.60518	TRAV12-2	T cell receptor alpha variable 12-2
A0A075B6T7	0.62016	TRAV6	T cell receptor alpha variable 6
A0A075B6T8	0.58902	TRAV9-1	T cell receptor alpha variable 9-1
A0A075B6U4	0.58999	TRAV7	T cell receptor alpha variable 7
A0A075B6U6	0.62978	TRAV8-7	T cell receptor alpha variable 8-7 (pseudogene)
A0A075B6V5	0.5981	TRAV36DV7	T cell receptor alpha variable 36/delta variable 7
A0A075B6W5	0.61259	TRAV23DV6	T cell receptor alpha variable 23/delta variable 6
A0A075B6X5	0.58365	TRAV18	T cell receptor alpha variable 18
A0A075B734	0.44542	AQP7B	aquaporin 7B
A0A075B759	0.80429	PPIAL4E	peptidylprolyl isomerase A like 4E
A0A075B767	0.80253	PPIAL4H	peptidylprolyl isomerase A like 4H
A0A075B7B6	0.62103	IGHV4OR15-8	immunoglobulin heavy variable 4/OR15-8 (non-functional)
A0A075B7B8	0.52251	IGHV3OR16-12	immunoglobulin heavy variable 3/OR16-12 (non-functional)
A0A075B7D0	0.57881	IGHV1OR15-1	immunoglobulin heavy variable 1/OR15-1 (non-functional)
A0A075B7D4	0.59622	IGKV1OR2-108	immunoglobulin kappa variable 1/OR2-108 (non-functional)
A0A075B7D8	0.5745	IGHV3OR15-7	immunoglobulin heavy variable 3/OR15-7 (pseudogene)
A0A075B7E8	0.57202	IGHV3OR16-13	immunoglobulin heavy variable 3/OR16-13 (non-functional)
A0A075B7F0	0.57879	IGHV3OR16-10	immunoglobulin heavy variable 3/OR16-10 (non-functional)
A0A075B7F1	0.57372	IGHV3OR16-8	immunoglobulin heavy variable 3/OR16-8 (non-functional)
A0A087WSX0	0.58711	IGLV5-45	immunoglobulin lambda variable 5-45
A0A087WSY4	0.62121	IGHV4-30-2	immunoglobulin heavy variable 4-30-2
A0A087WSY6	0.61307	IGKV3D-15	immunoglobulin kappa variable 3D-15
A0A087WSZ0	0.6111	IGKV1D-8	immunoglobulin kappa variable 1D-8
A0A087WSZ9	0.57852	TRAV30	T cell receptor alpha variable 30
A0A087WT01	0.55886	TRAV27	T cell receptor alpha variable 27
A0A087WT02	0.58927	TRAV9-2	T cell receptor alpha variable 9-2
A0A087WT03	0.62187	TRAV26-1	T cell receptor alpha variable 26-1
A0A087WUV0	0.342528	LOC344065	Zinc finger protein 2
A0A087WV53	0.56366	SPEGNB	SPEG neighbor
A0A087WV62	0.57018	TRBV16	T cell receptor beta variable 16
A0A087WVF3	0.35704	TBC1D3D	TBC1 domain family member 3D
A0A087WW49	0.62131		Ig-like domain-containing protein
A0A087WW87	0.58122	IGKV2-40	immunoglobulin kappa variable 2-40
A0A087WX78	0.45341
A0A087WXS9	0.35859	TBC1D3I	TBC1 domain family member 3I
A0A087WYE8	0.57585	IGHV1OR21-1	immunoglobulin heavy variable 1/OR21-1 (non-functional)
A0A087WZ39	0.57356	TRBV15	T cell receptor beta variable 15
A0A087X0K7	0.57503	TRBV17	T cell receptor beta variable 17 (non-functional)
A0A087X0M5	0.56003	TRBV18	T cell receptor beta variable 18
A0A087X179	0.35957	TBC1D3E	TBC1 domain family member 3E
A0A087X1C5	0.33192	CYP2D7	cytochrome P450 family 2 subfamily D member 7 (gene/pseudogene)
A0A087X1G2	0.353	TBC1D3K	TBC1 domain family member 3K
A0A087X1L8	0.61037	LOC102723996	Ig-like domain-containing protein
A0A096LNW5	0.322296	NOTCH2NLR	notch 2 N-terminal like R
A0A096LP49	0.88847	CCDC187	coiled-coil domain containing 187
A0A096LP55	0.57552	UQCRHL	ubiquinol-cytochrome c reductase hinge protein like
A0A096LPH7	0.58052		TRAPPC10 domain-containing protein
A0A096LPK6	0.44499		Exostosin domain-containing protein
A0A096LPK9	0.57904	OR4N4C	olfactory receptor family 4 subfamily N member 4C
A0A0A0MRZ7	0.59893	IGKV2D-26	immunoglobulin kappa variable 2D-26
A0A0A0MRZ8	0.6023	IGKV3D-11	immunoglobulin kappa variable 3D-11
A0A0A0MRZ9	0.57744	IGLV5-52	immunoglobulin lambda variable 5-52
A0A0A0MS00	0.53881	IGLV3-32	immunoglobulin lambda variable 3-32 (non-functional)
A0A0A0MS01	0.60232	TRGV10	T cell receptor gamma variable 10 (non-functional)
A0A0A0MS02	0.5593	TRGV1	T cell receptor gamma variable 1 (non-functional)
A0A0A0MS03	0.56161	TRBV5-3	T cell receptor beta variable 5-3 (non-functional)
A0A0A0MS04	0.56209	TRBV6-7	T cell receptor beta variable 6-7 (non-functional)
A0A0A0MS05	0.56566	TRBV5-7	T cell receptor beta variable 5-7 (non-functional)
A0A0A0MS06	0.57598	TRBV23-1	T cell receptor beta variable 23-1 (non-functional)
A0A0A0MS14	0.59831	IGHV1-45	immunoglobulin heavy variable 1-45
A0A0A0MS15	0.57977	IGHV3-49	immunoglobulin heavy variable 3-49
A0A0A0MT36	0.61072	IGKV6D-21	immunoglobulin kappa variable 6D-21 (non-functional)
A0A0A6YYC5	0.62982	TRAV14DV4	T cell receptor alpha variable 14/delta variable 4
A0A0A6YYD4	0.56312	TRBV13	T cell receptor beta variable 13
A0A0A6YYG2	0.56504	TRBV6-6	T cell receptor beta variable 6-6
A0A0A6YYG3	0.56792	TRBV6-8	T cell receptor beta variable 6-8
A0A0A6YYJ7	0.60676	TRAV8-3	T cell receptor alpha variable 8-3
A0A0A6YYK1	0.60798	TRAV8-1	T cell receptor alpha variable 8-1
A0A0A6YYK4	0.56034	TRBV7-1	T cell receptor beta variable 7-1 (non-functional)
A0A0A6YYK6	0.59827	TRAV16	T cell receptor alpha variable 16
A0A0A6YYK7	0.61419	TRAV19	T cell receptor alpha variable 19
A0A0A6YYL3	0.603501	POTEB	POTE ankyrin domain family member B
A0A0B4J1T7	0.41865	LY6G6E	lymphocyte antigen 6 family member G6E (pseudogene)
A0A0B4J1U3	0.57663	IGLV1-36	immunoglobulin lambda variable 1-36
A0A0B4J1U4	0.56582	TRGV5	T cell receptor gamma variable 5
A0A0B4J1U6	0.57042	TRBV9	T cell receptor beta variable 9
A0A0B4J1U7	0.61933	IGHV6-1	immunoglobulin heavy variable 6-1
A0A0B4J1V0	0.57907	IGHV3-15	immunoglobulin heavy variable 3-15
A0A0B4J1V1	0.57603	IGHV3-21	immunoglobulin heavy variable 3-21
A0A0B4J1V2	0.62413	IGHV2-26	immunoglobulin heavy variable 2-26
A0A0B4J1V6	0.5729	IGHV3-73	immunoglobulin heavy variable 3-73
A0A0B4J1V7	0.5791	IGHV7-81	immunoglobulin heavy variable 7-81 (non-functional)
A0A0B4J1W7	0.89122	NPIPA9	nuclear pore complex interacting protein family, member A9
A0A0B4J1X5	0.58125	IGHV3-74	immunoglobulin heavy variable 3-74
A0A0B4J1X8	0.5795	IGHV3-43	immunoglobulin heavy variable 3-43
A0A0B4J1Y8	0.59367	IGLV9-49	immunoglobulin lambda variable 9-49
A0A0B4J1Y9	0.57886	IGHV3-72	immunoglobulin heavy variable 3-72
A0A0B4J1Z2	0.60263	IGKV1D-43	immunoglobulin kappa variable 1D-43
A0A0B4J234	0.58082	TRAV2	T cell receptor alpha variable 2
A0A0B4J235	0.57595	TRAV13-2	T cell receptor alpha variable 13-2
A0A0B4J237	0.60192	TRAV8-2	T cell receptor alpha variable 8-2
A0A0B4J238	0.5818	TRAV1-2	T cell receptor alpha variable 1-2
A0A0B4J240	0.60273	TRAV10	T cell receptor alpha variable 10
A0A0B4J241	0.61292	TRAV13-1	T cell receptor alpha variable 13-1
A0A0B4J244	0.60961	TRAV3	T cell receptor alpha variable 3
A0A0B4J245	0.59604	TRAV12-1	T cell receptor alpha variable 12-1
A0A0B4J248	0.60216	TRAV1-1	T cell receptor alpha variable 1-1
A0A0B4J249	0.61939	TRAV5	T cell receptor alpha variable 5
A0A0B4J262	0.59911	TRAV8-6	T cell receptor alpha variable 8-6
A0A0B4J263	0.57307	TRAV39	T cell receptor alpha variable 39
A0A0B4J264	0.62391	TRAV38-1	T cell receptor alpha variable 38-1
A0A0B4J265	0.61824	TRAV26-2	T cell receptor alpha variable 26-2
A0A0B4J266	0.58283	TRAV41	T cell receptor alpha variable 41
A0A0B4J268	0.62297	TRAV4	T cell receptor alpha variable 4
A0A0B4J271	0.57625	TRAV12-3	T cell receptor alpha variable 12-3
A0A0B4J272	0.59844	TRAV24	T cell receptor alpha variable 24
A0A0B4J273	0.58175	TRAV34	T cell receptor alpha variable 34
A0A0B4J274	0.61796	TRAV20	T cell receptor alpha variable 20
A0A0B4J275	0.58041	TRAV17	T cell receptor alpha variable 17
A0A0B4J276	0.56653	TRAV25	T cell receptor alpha variable 25
A0A0B4J277	0.60914	TRAV22	T cell receptor alpha variable 22
A0A0B4J279	0.61675	TRAV21	T cell receptor alpha variable 21
A0A0B4J280	0.62373	TRAV40	T cell receptor alpha variable 40
A0A0B4J2A2	0.80313	PPIAL4C	peptidylprolyl isomerase A like 4C
A0A0B4J2B6	0.62864	IGHV2OR16-5	immunoglobulin heavy variable 2/OR16-5 (non-functional)
A0A0B4J2B8	0.58068	IGHV1OR15-9	immunoglobulin heavy variable 1/OR15-9 (non-functional)
A0A0B4J2D5	0.66734	GATD3B	Putative glutamine amidotransferase-like class 1 domain-containing protein 3B, mitochondrial (Keio novel protein-I) (KNP-I) (Protein GT335) (Protein HES1)
A0A0B4J2D9	0.60796	IGKV1D-13	immunoglobulin kappa variable 1D-13
A0A0B4J2E0	0.57085	TRBV12-4	T cell receptor beta variable 12-4
A0A0B4J2E5	0.35792		Utp12 domain-containing protein
A0A0B4J2F2	0.72481	SIK1B	Putative serine/threonine-protein kinase SIK1B (EC 2.7.11.1) (Salt-inducible kinase 1B)
A0A0B4J2H0	0.60959	IGHV1-69D	immunoglobulin heavy variable 1-69D
A0A0C4DH24	0.61178	IGKV6-21	immunoglobulin kappa variable 6-21 (non-functional)
A0A0C4DH25	0.60171	IGKV3D-20	immunoglobulin kappa variable 3D-20
A0A0C4DH26	0.60489	IGKV6D-41	immunoglobulin kappa variable 6D-41 (non-functional)
A0A0C4DH27	0.57255	TRGV8	T cell receptor gamma variable 8
A0A0C4DH28	0.55419	TRGV4	T cell receptor gamma variable 4
A0A0C4DH29	0.5812	IGHV1-3	immunoglobulin heavy variable 1-3
A0A0C4DH30	0.58228	IGHV3-16	immunoglobulin heavy variable 3-16 (non-functional)
A0A0C4DH31	0.58076	IGHV1-18	immunoglobulin heavy variable 1-18
A0A0C4DH32	0.57393	IGHV3-20	immunoglobulin heavy variable 3-20
A0A0C4DH33	0.60222	IGHV1-24	immunoglobulin heavy variable 1-24
A0A0C4DH34	0.618	IGHV4-28	immunoglobulin heavy variable 4-28
A0A0C4DH35	0.58005	IGHV3-35	immunoglobulin heavy variable 3-35 (non-functional)
A0A0C4DH36	0.57594	IGHV3-38	immunoglobulin heavy variable 3-38 (non-functional)
A0A0C4DH38	0.56918	IGHV5-51	immunoglobulin heavy variable 5-51
A0A0C4DH39	0.60122	IGHV1-58	immunoglobulin heavy variable 1-58
A0A0C4DH41	0.62036	IGHV4-61	immunoglobulin heavy variable 4-61
A0A0C4DH42	0.57207	IGHV3-66	immunoglobulin heavy variable 3-66
A0A0C4DH43	0.62305	IGHV2-70D	immunoglobulin heavy variable 2-70D
A0A0C4DH55	0.594	IGKV3D-7	immunoglobulin kappa variable 3D-7
A0A0C4DH59	0.57014	TRBV5-4	T cell receptor beta variable 5-4
A0A0C4DH67	0.60519	IGKV1-8	immunoglobulin kappa variable 1-8
A0A0C4DH68	0.59508	IGKV2-24	immunoglobulin kappa variable 2-24
A0A0C4DH69	0.59839	IGKV1-9	immunoglobulin kappa variable 1-9
A0A0C4DH72	0.60899	IGKV1-6	immunoglobulin kappa variable 1-6
A0A0C4DH73	0.60685	IGKV1-12	immunoglobulin kappa variable 1-12
A0A0C4DH90	0.59963	IGKV3OR2-268	immunoglobulin kappa variable 3/OR2-268 (non-functional)
A0A0G2JKD1	0.665254	MUC21	mucin 21, cell surface associated
A0A0G2JLG4	0.31129	ASIC5	acid sensing ion channel subunit family member 5
A0A0G2JLM5	0.34204	KIR2DS5	killer cell immunoglobulin like receptor, two Ig domains and short cytoplasmic tail 5
A0A0G2JLQ3	0.41589	KIR2DS5	killer cell immunoglobulin like receptor, two Ig domains and short cytoplasmic tail 5
A0A0G2JMD5	0.539634	PRAMEF33	PRAME family member 33
A0A0G2JMH6	0.40848	HLA-DRA	major histocompatibility complex, class II, DR alpha
A0A0G2JMI3	0.58015	IGHV1-69-2	immunoglobulin heavy variable 1-69-2
A0A0G2JMM0	0.35462		Killer cell immunoglobulin-like receptor
A0A0G2JMP0	0.7515	OR4M2B	olfactory receptor family 4 subfamily M member 2B
A0A0G2JMS6	0.45685		Ovostatin
A0A0G2JN01	0.35293	KIR3DP1	killer cell immunoglobulin like receptor, three Ig domains pseudogene 1
A0A0G2JN53	0.86216		IQ motif and SEC7 domain-containing protein 3
A0A0G2JN68	0.42176	KIR2DL5B	killer cell immunoglobulin like receptor, two Ig domains and long cytoplasmic tail 5B
A0A0G2JNF4	0.41508	KIR2DP1	killer cell immunoglobulin like receptor, two Ig domains pseudogene 1
A0A0G2JNG1	0.41541	KIR2DS5	killer cell immunoglobulin like receptor, two Ig domains and short cytoplasmic tail 5
A0A0G2JNH3	0.61029		Olfactory receptor
A0A0G2JNQ3	0.57067	HNRNPCL2	heterogeneous nuclear ribonucleoprotein C like 2
A0A0G2JP20	0.54093	PRAMEF9	PRAME family member 9
A0A0G2JPB7	0.559826	BTNL2	butyrophilin like 2
A0A0G2JPC4	0.42178	KIR2DL5B	killer cell immunoglobulin like receptor, two Ig domains and long cytoplasmic tail 5B
A0A0G2JPF8	0.56602	HNRNPCL4	heterogeneous nuclear ribonucleoprotein C like 4
A0A0G2JQ47	0.4145	KIR2DS1	killer cell immunoglobulin like receptor, two Ig domains and short cytoplasmic tail 1
A0A0G2JRQ6	0.5928		Ig-like domain-containing protein
A0A0G2JS06	0.56849	IGLV5-39	immunoglobulin lambda variable 5-39
A0A0J9YVY3	0.60055	IGHV7-4-1	immunoglobulin heavy variable 7-4-1
A0A0J9YW62	0.58606		IGv domain-containing protein
A0A0J9YWL9	0.59249	TEX13C	TEX13 family member C
A0A0J9YWU9	0.6147		Ig-like domain-containing protein
A0A0J9YX35	0.57602	IGHV3-64D	immunoglobulin heavy variable 3-64D
A0A0J9YX57	0.553851	MAGEB6B	MAGE family member B6B
A0A0J9YX75	0.56068	TRBV6-9	T cell receptor beta variable 6-9
A0A0J9YX94	0.50676	PNMA6F	PNMA family member 6F
A0A0J9YXQ4	0.526975	PNMA6E	PNMA family member 6E
A0A0J9YXX1	0.5671	IGHV5-10-1	immunoglobulin heavy variable 5-10-1
A0A0J9YXY3	0.55794	TRBV6-2	T cell receptor beta variable 6-2
A0A0J9YY54	0.86571	TEX13D	TEX13 family member D
A0A0J9YY99	0.57818		Ig-like domain-containing protein
A0A0K0K1A3	0.56016	TRBV10-1	T cell receptor beta variable 10-1
A0A0K0K1A5	0.56249	TRBV6-5	T cell receptor beta variable 6-5
A0A0K0K1B3	0.58435	TRBV30	T cell receptor beta variable 30
A0A0K0K1C0	0.57554	TRBV11-1	T cell receptor beta variable 11-1
A0A0K0K1C4	0.5616	TRBV27	T cell receptor beta variable 27
A0A0K0K1D8	0.56157	TRBV6-1	T cell receptor beta variable 6-1
A0A0K0K1E9	0.56785	TRBV7-7	T cell receptor beta variable 7-7
A0A0K0K1G6	0.56571	TRBV10-3	T cell receptor beta variable 10-3
A0A0K0K1G8	0.55847	TRBV10-2	T cell receptor beta variable 10-2
A0A0K2S4Q6	0.64255	CD300H	CD300H molecule (gene/pseudogene)
A0A0M3HER8	0.720568	GOLGA6L10	golgin A6 family like 10
A0A0U1RQE8	0.67515	GLYATL1B	glycine-N-acyltransferase like 1B
A0A0U1RQI7	0.499341	KLF18	KLF transcription factor 18
A0A0U1RR11	0.36403	CENPVL1	centromere protein V like 1
A0A0U1RRI6	0.42253	CENPVL3	centromere protein V like 3
A0A0X1KG70	0.534138	OR4M2B	olfactory receptor family 4 subfamily M member 2B
A0A126GWB0	0.64609	OR2A2	olfactory receptor family 2 subfamily A member 2
A0A126GWI2	0.60644	OR2A25	olfactory receptor family 2 subfamily A member 25
A0A140G945	0.7387	CRYAA	crystallin alpha A
A0A140T8X8	0.61807	MUC21	mucin 21, cell surface associated
A0A140TA62	0.829842	LOC100653049	IF rod domain-containing protein
A0A191URJ7	0.40871	KIR2DL1	killer cell immunoglobulin like receptor, two Ig domains and long cytoplasmic tail 1
A0A1B0GTD5	0.34859	TEX49	Testis-expressed protein 49
A0A1B0GTE1	0.444345	CNTNAP3C	contactin associated protein family member 3C
A0A1B0GTH6	0.44195	CSNKA2IP	casein kinase 2 subunit alpha' interacting protein
A0A1B0GTH9	0.475	LOC100505841	Zinc finger protein 474
A0A1B0GTI8	0.51776	TMEM272	transmembrane protein 272
A0A1B0GTK4	0.52822	FAM237A	family with sequence similarity 237 member A
A0A1B0GTL2	0.5014	C20orf204	chromosome 20 open reading frame 204
A0A1B0GTQ1	0.34861		Cytochrome P450 family 2 subfamily D member 6
A0A1B0GTS1	0.46725	HSFX4	heat shock transcription factor family, X-linked member 4
A0A1B0GTU1	0.34061	ZC3H11B	zinc finger CCCH-type containing 11B
A0A1B0GTW7	0.366802	CIROP	ciliated left-right organizer metallopeptidase
A0A1B0GTZ2	0.855691	CCDC196	coiled-coil domain containing 196
A0A1B0GUA7	0.78726	TEX51	testis expressed 51
A0A1B0GUJ8	0.44805	PNMA8C	PNMA family member 8C
A0A1B0GUL7	0.69477		Protein kinase domain-containing protein
A0A1B0GUS4	0.78357	UBE2L5	ubiquitin conjugating enzyme E2 L5
A0A1B0GUU1	0.488133	C17orf113	chromosome 17 open reading frame 113
A0A1B0GUV8	0.48854	LOC102723971	Lipocln_cytosolic_FA-bd_dom domain-containing protein
A0A1B0GUW6	0.85995	SPEM3	SPEM family member 3
A0A1B0GUX0	0.3841	ATP6V1FNB	Protein ATP6V1FNB (ATP6V1F neighbor gene protein)
A0A1B0GV03	0.797849	GOLGA6L7	golgin A6 family like 7
A0A1B0GV85	0.56869	REELD1	reeler domain containing 1
A0A1B0GVD1	0.53276	FAM237B	family with sequence similarity 237 member B
A0A1B0GVG4	0.8199	CCDC194	coiled-coil domain containing 194
A0A1B0GVH4	0.33647	PRSS51	serine protease 51
A0A1B0GVH7	0.36286	IQCM	IQ motif containing M
A0A1B0GVK7	0.58286	FAM240A	family with sequence similarity 240 member A
A0A1B0GVR7	0.66527	FAM240C	family with sequence similarity 240 member C
A0A1B0GVZ2	0.65232	FAM240B	family with sequence similarity 240 member B
A0A1B0GVZ9	0.64906	TMEM269	transmembrane protein 269
A0A1B0GW15	0.89001	LOC122394732	Transposase
A0A1B0GW35	0.48305	EXOC1L	exocyst complex component 1 like
A0A1B0GWH4	0.46632	HSFX3	heat shock transcription factor family, X-linked member 3
A0A1B0GWK0	0.488591	PVALEF	parvalbumin like EF-hand containing
A0A1B0GX31	0.5657	TRBV7-6	T cell receptor beta variable 7-6
A0A1B0GX49	0.56059	TRBV6-4	T cell receptor beta variable 6-4
A0A1B0GX51	0.56684	TRBV7-8	T cell receptor beta variable 7-8
A0A1B0GX56	0.62973	TRDV1	T cell receptor delta variable 1
A0A1B0GX68	0.56766	TRBV2	T cell receptor beta variable 2
A0A1B0GX78	0.57001	TRBV12-5	T cell receptor beta variable 12-5
A0A1B0GX95	0.58046	TRBV7-4	T cell receptor beta variable 7-4
A0A1B0GXF2	0.56492	TRBV7-2	T cell receptor beta variable 7-2
A0A1W2PN81	0.32559	CHRNA7	cholinergic receptor nicotinic alpha 7 subunit
A0A1W2PP81	0.59503	TAF11L5	TATA-box binding protein associated factor 11 like 5
A0A1W2PP97	0.43688	THSD8	thrombospondin type 1 domain containing 8
A0A1W2PPD8	0.32426	KDM4F	lysine demethylase 4F
A0A1W2PPE2	0.59009	TAF11L4	TATA-box binding protein associated factor 11 like 4
A0A1W2PPF3	0.579577	DUXB	double homeobox B
A0A1W2PPG7	0.48313	GNG14	G protein subunit gamma 14
A0A1W2PPH5	0.59794	TAF11L13	TATA-box binding protein associated factor 11 like 13
A0A1W2PPK0	0.53909	CPHXL2	cytoplasmic polyadenylated homeobox like 2
A0A1W2PPL8	0.58678	TAF11L14	TATA-box binding protein associated factor 11 like 14
A0A1W2PPM1	0.5345	CPHXL	cytoplasmic polyadenylated homeobox like
A0A1W2PPW3	0.60172	TAF11L12	TATA-box binding protein associated factor 11 like 12
A0A1W2PQ09	0.59021	TAF11L11	TATA-box binding protein associated factor 11 like 11
A0A1W2PQ27	0.51629	SSU72P7	RNA polymerase II subunit A C-terminal domain phosphatase SSU72 (CTD phosphatase SSU72) (EC 3.1.3.16)
A0A1W2PQ64	0.52199	SSU72P5	RNA polymerase II subunit A C-terminal domain phosphatase SSU72 (CTD phosphatase SSU72) (EC 3.1.3.16)
A0A1W2PQ72	0.701057	MSANTD7	Myb/SANT DNA binding domain containing 7
A0A1W2PQ73	0.54158	ERFL	ETS repressor factor like
A0A1W2PQC6	0.52178	SSU72P4	RNA polymerase II subunit A C-terminal domain phosphatase SSU72 (CTD phosphatase SSU72) (EC 3.1.3.16)
A0A1W2PQD8	0.5215	SSU72P2	RNA polymerase II subunit A C-terminal domain phosphatase SSU72 (CTD phosphatase SSU72) (EC 3.1.3.16)
A0A1W2PQF6	0.40711		KIR2DL2
A0A1W2PQJ5	0.52033	SSU72P3	RNA polymerase II subunit A C-terminal domain phosphatase SSU72 (CTD phosphatase SSU72) (EC 3.1.3.16)
A0A1W2PQL4	0.399206	ZNF722	zinc finger protein 722
A0A1W2PQM1	0.45424		Killer cell immunoglobulin-like receptor
A0A1W2PR19	0.39996	GSTT4	glutathione S-transferase theta 4
A0A1W2PR48	0.84302	TLE7	TLE family member 7
A0A1W2PR64	0.59549	TAF11L9	TATA-box binding protein associated factor 11 like 9
A0A1W2PR75	0.51538	SSU72P8	RNA polymerase II subunit A C-terminal domain phosphatase SSU72 (CTD phosphatase SSU72) (EC 3.1.3.16)
A0A1W2PR82	0.42332	PERCC1	proline and glutamate rich with coiled coil 1
A0A1W2PR95	0.48515	IGBP1P2	HCG1642624, isoform CRA_a (Immunoglobulin (CD79A)-binding protein 1 pseudogene 2)
A0A1W2PRG0	0.39752		glutathione transferase (EC 2.5.1.18)
A0A1W2PRN1	0.8763		GOLGA2L5 domain-containing protein
A0A1W2PRN6	0.59176	LINC02218	long intergenic non-protein coding RNA 2218
A0A1W2PRP0	0.59299	FOXL3	forkhead box L3
A0A1W2PRS3	0.40557		Killer cell immunoglobulin-like receptor KIR2DL1
A0A1W2PRV1	0.59473	TAF11L3	TATA-box binding protein associated factor 11 like 3
A0A1W2PS18	0.62315	PMIS2	PMIS2 transmembrane protein
A0A286YEU6	0.49503	OR1R1P	olfactory receptor family 1 subfamily R member 1 pseudogene
A0A286YF58	0.87071	TMEM271	transmembrane protein 271
A0A2R8Y422	0.546836	RPS27AP5	ribosomal protein S27a pseudogene 5
A0A2R8Y4L2	0.41529	HNRNPA1L3	heterogeneous nuclear ribonucleoprotein A1 like 3
A0A2R8Y4L6	0.59925	OR5D3P	olfactory receptor family 5 subfamily D member 3 pseudogene
A0A2R8Y4M4	0.66263	LOC122513141	RING-type domain-containing protein
A0A2R8Y4Y8	0.55716	OOSP4B	oocyte secreted protein family member 4B
A0A2R8Y5M8	0.63609	TOMT	transmembrane O-methyltransferase
A0A2R8Y619	0.66051	H2BK1	H2B.K variant histone 1
A0A2R8Y7D0	0.71593	TINCR	TINCR ubiquitin domain containing
A0A2R8YCY7	0.406		KIR2DL2
A0A2R8YE69	0.782588		MIA SH3 domain ER export factor 2
A0A2R8YED5	0.59474	OR5BS1P	olfactory receptor family 5 subfamily BS member 1 pseudogene
A0A2R8YEG4	0.61471	OR2A1	olfactory receptor family 2 subfamily A member 1
A0A2R8YEH3	0.63119	LOC112268384	Olfactory receptor
A0A2R8YEV3	0.62048	OR2A42	olfactory receptor family 2 subfamily A member 42
A0A2R8YFL7	0.55653	OOSP4A	oocyte secreted protein family member 4A
A0A2R8YFM6	0.55685	OOSP3	oocyte secreted protein family member 3
A0A2R8YFR7	0.3851		DH domain-containing protein
A0A376A8Z9	0.41734	KIR2DS5	killer cell immunoglobulin like receptor, two Ig domains and short cytoplasmic tail 5
A0A3B3IRS2	0.44719	LOC647264	Keratin-associated protein 21-1-like
A0A3B3IRV3	0.78127	MCTS2	MCTS family member 2
A0A3B3IT33	0.401298	TRIM51G	tripartite motif-containing 51G
A0A3B3IT45	0.63729	OR51C1P	olfactory receptor family 51 subfamily C member 1 pseudogene
A0A3B3IT52	0.4912	MSANTD5	Myb/SANT DNA binding domain containing 5
A0A3B3IU63	0.62835	H2AL3	H2A.L variant histone 3
A0A494C071	0.447816	PWWP4	PWWP domain containing 4
A0A494C086	0.4972	SPDYE21	speedy/RINGO cell cycle regulator family member E21
A0A494C0I6	0.87484		Secreted protein
A0A494C0N9	0.77056	FAM246B	family with sequence similarity 246 member B
A0A494C0Y3	0.83021	FAM246A	family with sequence similarity 246 member A
A0A494C0Z2	0.48904	SPDYE13	speedy/RINGO cell cycle regulator family member E13
A0A494C103	0.6094	LOC112577516	CUB domain-containing protein
A0A494C191	0.49277	SPDYE9	speedy/RINGO cell cycle regulator family member E9
A0A494C1R9	0.40216	TSPY9	testis specific protein Y-linked 9
A0A499FJF3	0.37518		Rho-GAP domain-containing protein
A0A4W9AIG4	0.6706	OR2A14	olfactory receptor family 2 subfamily A member 14
A0A539	0.57065	TRBV4-2	T cell receptor beta variable 4-2
A0A576	0.56433	TRBV3-1	T cell receptor beta variable 3-1
A0A577	0.58136	TRBV4-1	T cell receptor beta variable 4-1
A0A578	0.56214	TRBV5-1	T cell receptor beta variable 5-1
A0A584	0.57999	TRBV11-2	T cell receptor beta variable 11-2
A0A589	0.57618	TRBV4-3	T cell receptor beta variable 4-3
A0A597	0.56201	TRBV5-5	T cell receptor beta variable 5-5
A0A599	0.55994	TRBV5-6	T cell receptor beta variable 5-6
A0A5A2	0.55642	TRBV5-8	T cell receptor beta variable 5-8
A0A5A6	0.5774	TRBV11-3	T cell receptor beta variable 11-3
A0A5B0	0.56393	TRBV14	T cell receptor beta variable 14
A0A5B6	0.5663	TRBV28	T cell receptor beta variable 28
A0A5B7	0.58472	TRBV29-1	T cell receptor beta variable 29-1
A0A5B9	0.55335	TRBC2	T cell receptor beta constant 2
A0A5F9Z9Y6	0.40674		KIR2DL2
A0A5F9ZH88	0.41516		KIR2DL1
A0A5F9ZHS7	0.77224	NFILZ	NFIL3 like basic leucine zipper
A0A5K1VDZ0	0.41762	KIR2DL1	killer cell immunoglobulin like receptor, two Ig domains and long cytoplasmic tail 1
A0A5S8K742	0.38204
A0A7I2V3D3	0.88277
A0A7I2V3R4	0.4644	LOC122319436	RING-type domain-containing protein
A0AUZ9	0.94988	KANSL1L	KAT8 regulatory NSL complex subunit 1 like
A0AV02	0.81801	SLC12A8	solute carrier family 12 member 8
A0AV96	0.53049	RBM47	RNA binding motif protein 47
A0AVF1	0.62145	TTC26	Intraflagellar transport protein 56 (Tetratricopeptide repeat protein 26) (TPR repeat protein 26)
A0AVI2	0.440505	FER1L5	fer-1 like family member 5
A0AVI4	0.399833	TMEM129	transmembrane protein 129, E3 ubiquitin ligase
A0AVK6	0.38549	E2F8	E2F transcription factor 8
A0AVT1	0.51404	UBA6	ubiquitin like modifier activating enzyme 6
A0FGR8	0.419918	ESYT2	extended synaptotagmin 2
A0FGR9	0.442224	ESYT3	extended synaptotagmin 3
A0JD32	0.61908	TRAV38-2DV8	T cell receptor alpha variable 38-2/delta variable 8
A0JD36	0.59043	TRDV2	T cell receptor delta variable 2
A0JD37	0.64591	TRDV3	T cell receptor delta variable 3
A0JLT2	0.34601	MED19	mediator complex subunit 19
A0JNW5	0.3037	BLTP3B	bridge-like lipid transfer protein family member 3B
A0JP26	0.601607	POTEB3	POTE ankyrin domain family member B3
A0M8Q6	0.63652	IGLC7	immunoglobulin lambda constant 7
A0MZ66	0.838303	SHTN1	shootin 1
A0PG75	0.75001	PLSCR5	phospholipid scramblase family member 5
A0PJE2	0.80264	DHRS12	dehydrogenase/reductase 12
A0PJK1	0.55832	SLC5A10	solute carrier family 5 member 10
A0PJW6	0.69789	TMEM223	transmembrane protein 223
A0PJX0	0.38314	CIB4	calcium and integrin binding family member 4
A0PJX2	0.39233	TLDC2	TBC/LysM-associated domain containing 2
A0PJX4	0.35676	SHISA3	shisa family member 3
A0PJX8	0.44238	TMEM82	transmembrane protein 82
A0PJY2	0.329487	FEZF1	FEZ family zinc finger 1
A0PJZ0	0.4494	ANKRD20A5P	ankyrin repeat domain 20 family member A5, pseudogene
A0PJZ3	0.50842	GXYLT2	glucoside xylosyltransferase 2
A0PK00	0.4833	TMEM120B	transmembrane protein 120B
A0PK05	0.70708	TMEM72	transmembrane protein 72
A0PK11	0.62088	CLRN2	clarin 2
A0ZSE6	0.51318	TMEM30CP	transmembrane protein 30C, pseudogene
A1A4S6	0.522494	ARHGAP10	Rho GTPase activating protein 10
A1A4V9	0.44023	CFAP119	cilia and flagella associated protein 119
A1A4Y4	0.61095	IRGM	immunity related GTPase M
A1A519	0.4594	FAM170A	family with sequence similarity 170 member A
A1A5B4	0.30399	ANO9	anoctamin 9
A1A5C7	0.7261	SLC22A23	solute carrier family 22 member 23
A1A5D9	0.668305	BICDL2	BICD family like cargo adaptor 2
A1IGU5	0.593982	ARHGEF37	Rho guanine nucleotide exchange factor 37
A1KZ92	0.473785	PXDNL	peroxidasin like
A1L020	0.664776	MEX3A	mex-3 RNA binding family member A
A1L0T0	0.83392	ILVBL	ilvB acetolactate synthase like
A1L157	0.45473	TSPAN11	tetraspanin 11
A1L162	0.70757	ERICH2	glutamate rich 2
A1L167	0.59146	UBE2QL1	ubiquitin conjugating enzyme E2 Q family like 1
A1L168	0.89657	C20orf202	chromosome 20 open reading frame 202
A1L188	0.53642	NDUFAF8	NADH:ubiquinone oxidoreductase complex assembly factor 8
A1L1A6	0.65554	IGSF23	immunoglobulin superfamily member 23
A1L390	0.39578	PLEKHG3	pleckstrin homology and RhoGEF domain containing G3
A1L3X0	0.51141	ELOVL7	ELOVL fatty acid elongase 7
A1L443	0.441696	NUTM2F	NUT family member 2F
A1L453	0.38297	PRSS38	serine protease 38
A1L4H1	0.423024	SSC5D	scavenger receptor cysteine rich family member with 5 domains
A1L4K1	0.463181	FSD2	fibronectin type III and SPRY domain containing 2
A1L4L8	0.45482	PLAC8L1	PLAC8 like 1
A1X283	0.53678	SH3PXD2B	SH3 and PX domains 2B
A1XBS5	0.75348	CIBAR1	CBY1 interacting BAR domain containing 1
A1YPR0	0.362517	ZBTB7C	zinc finger and BTB domain containing 7C
A1Z1Q3	0.7699	MACROD2	mono-ADP ribosylhydrolase 2
A2A288	0.66909	ZC3H12D	zinc finger CCCH-type containing 12D
A2A2Y4	0.375998	FRMD3	FERM domain containing 3
A2A2Z9	0.690406	ANKRD18B	ankyrin repeat domain 18B
A2A368	0.40305	MAGEB16	MAGE family member B16
A2A3K4	0.3534	PTPDC1	protein tyrosine phosphatase domain containing 1
A2A3L6	0.64213	TTC24	tetratricopeptide repeat domain 24
A2A3N6	0.555632	PIPSL	PIP5K1A and PSMD4 like (pseudogene)
A2CJ06	0.444669	DYTN	dystrotelin
A2IDD5	0.908695	CCDC78	coiled-coil domain containing 78
A2NJV5	0.59267	IGKV2-29	immunoglobulin kappa variable 2-29
A2PYH4	0.743208	HFM1	helicase for meiosis 1
A2RRD8	0.391177	ZNF320	zinc finger protein 320
A2RRH5	0.749392	WDR27	WD repeat domain 27
A2RRP1	0.510518	NBAS	NBAS subunit of NRZ tethering complex
A2RTX5	0.625081	TARS3	threonyl-tRNA synthetase 3
A2RTY3	0.53396	HEATR9	HEAT repeat containing 9
A2RU14	0.69005	TMEM218	transmembrane protein 218
A2RU30	0.52344	TESPA1	thymocyte expressed, positive selection associated 1
A2RU48	0.5288	SMCO3	single-pass membrane protein with coiled-coil domains 3
A2RU49	0.72781	HYKK	hydroxylysine kinase
A2RU54	0.58591	HMX2	H6 family homeobox 2
A2RU67	0.69018	FAM234B	family with sequence similarity 234 member B
A2RUB1	0.52175	MEIOC	meiosis specific with coiled-coil domain
A2RUB6	0.731978	CCDC66	coiled-coil domain containing 66
A2RUC4	0.35523	TYW5	tRNA-yW synthesizing protein 5
A2RUH7	0.695605	MYBPHL	myosin binding protein H like
A2RUR9	0.800883	CCDC144A	coiled-coil domain containing 144A
A2RUS2	0.467245	DENND3	DENN domain containing 3
A2RUU4	0.33703	CLPSL1	colipase like 1
A2VCK2	0.621779	DCDC2B	doublecortin domain containing 2B
A2VDF0	0.42746	FUOM	fucose mutarotase
A2VDJ0	0.502476	TMEM131L	transmembrane 131 like
A3KFT3	0.61758	OR2M5	olfactory receptor family 2 subfamily M member 5
A3KMH1	0.551291	VWA8	von Willebrand factor A domain containing 8
A3KN83	0.50816	SBNO1	strawberry notch homolog 1
A3QJZ6	0.53037	PRAMEF22	PRAME family member 22
A3QJZ7	0.54231	PRAMEF27	PRAME family member 27
A4D0S4	0.440562	LAMB4	laminin subunit beta 4
A4D0V7	0.456456	CPED1	cadherin like and PC-esterase domain containing 1
A4D126	0.53171	CRPPA	CDP-L-ribitol pyrophosphorylase A
A4D161	0.34304	FAM221A	family with sequence similarity 221 member A
A4D1B5	0.418684	GSAP	gamma-secretase activating protein
A4D1E1	0.68269	ZNF804B	zinc finger protein 804B
A4D1E9	0.559062	GTPBP10	GTP binding protein 10
A4D1F6	0.590673	LRRD1	leucine rich repeats and death domain containing 1
A4D1P6	0.701571	WDR91	WD repeat domain 91
A4D1S0	0.43469	KLRG2	killer cell lectin like receptor G2
A4D1S5	0.9378	RAB19	RAB19, member RAS oncogene family
A4D1T9	0.38961	PRSS37	serine protease 37
A4D1U4	0.47611	DENND11	DENN domain containing 11
A4D1Z8	0.65627	GRIFIN	galectin-related inter-fiber protein
A4D256	0.34599	CDC14C	cell division cycle 14C
A4D2B0	0.67713	MBLAC1	metallo-beta-lactamase domain containing 1
A4D2B8	0.63115	PMS2P1	PMS1 homolog 2, mismatch repair system component pseudogene 1
A4D2G3	0.632	OR2A25	olfactory receptor family 2 subfamily A member 25
A4D2H0	0.764982	CTAGE15	CTAGE family member 15
A4D2P6	0.448606	GRID2IP	Grid2 interacting protein
A4FU01	0.31573	MTMR11	myotubularin related protein 11
A4FU28	0.765293	CTAGE9	CTAGE family member 9
A4FU49	0.746502	SH3D21	SH3 domain containing 21
A4FU69	0.271752	EFCAB5	EF-hand calcium binding domain 5
A4GXA9	0.544803	EME2	essential meiotic structure-specific endonuclease subunit 2
A4IF30	0.82392	SLC35F4	solute carrier family 35 member F4
A4QMS7	0.30943	C5orf49	Uncharacterized protein C5orf49
A4QPB2	0.72212	LRP5L	LDL receptor related protein 5 like (pseudogene)
A4QPH2	0.46603	PI4KAP2	phosphatidylinositol 4-kinase alpha pseudogene 2
A5A3E0	0.791597	POTEF	POTE ankyrin domain family member F
A5D6W6	0.47305	FITM1	fat storage inducing transmembrane protein 1
A5D8T8	0.393247	CLEC18A	C-type lectin domain family 18 member A
A5D8V6	0.47635	VPS37C	VPS37C subunit of ESCRT-I
A5D8V7	0.660409	ODAD3	outer dynein arm docking complex subunit 3
A5D8W1	0.4835	CFAP69	cilia and flagella associated protein 69
A5LHX3	0.90495	PSMB11	proteasome subunit beta 11
A5PKW4	0.422562	PSD	pleckstrin and Sec7 domain containing
A5PLK6	0.467251	RGSL1	regulator of G protein signaling like 1
A5PLL1	0.44558	ANKRD34B	ankyrin repeat domain 34B
A5PLL7	0.4113	PEDS1	plasmanylethanolamine desaturase 1
A5PLN9	0.513086	TRAPPC13	trafficking protein particle complex subunit 13
A5X5Y0	0.34537	HTR3E	5-hydroxytryptamine receptor 3E
A5YKK6	0.456866	CNOT1	CCR4-NOT transcription complex subunit 1
A5YM72	0.44044	CARNS1	carnosine synthase 1
A6BM72	0.350521	MEGF11	multiple EGF like domains 11
A6H8M9	0.584264	CDHR4	cadherin related family member 4
A6H8Y1	0.47301	BDP1	B double prime 1, subunit of RNA polymerase III transcription initiation factor IIIB
A6H8Z2	0.3396	FAM221B	family with sequence similarity 221 member B
A6NC42	0.55508	DPPA5	developmental pluripotency associated 5
A6NC51	0.7909	TMEM150B	transmembrane protein 150B
A6NC57	0.677545	ANKRD62	ankyrin repeat domain 62
A6NC78	0.784236	GOLGA8IP	golgin A8 family member I, pseudogene
A6NC86	0.35342	PINLYP	phospholipase A2 inhibitor and LY6/PLAUR domain containing
A6NC97	0.54753	FAM172BP	Putative protein FAM172B (FAM172B pseudogene)
A6NC98	0.606575	CCDC88B	coiled-coil domain containing 88B
A6NCC3	0.81345	GOLGA8O	golgin A8 family member O
A6NCE7	0.49593	MAP1LC3B2	microtubule associated protein 1 light chain 3 beta 2
A6NCF5	0.693927	KLHL33	kelch like family member 33
A6NCF6	0.42112	MAGEA13P	MAGE family member A13, pseudogene
A6NCI4	0.504514	VWA3A	von Willebrand factor A domain containing 3A
A6NCK2	0.37783	TRIM43B	tripartite motif containing 43B
A6NCL1	0.8719	GMNC	geminin coiled-coil domain containing
A6NCL2	0.32911	LRCOL1	leucine rich colipase like 1
A6NCL7	0.4742	ANKRD33B	ankyrin repeat domain 33B
A6NCM1	0.41229	IQCA1L	IQ motif containing with AAA domain 1 like
A6NCN2	0.864736	KRT87P	keratin 87, pseudogene
A6NCN8	0.61352	TEX52	testis expressed 52
A6NCQ9	0.60688	RNF222	ring finger protein 222
A6NCS4	0.60683	NKX2-6	NK2 homeobox 6
A6NCS6	0.59741	C2orf72	chromosome 2 open reading frame 72
A6NCV1	0.62531	OR6C74	olfactory receptor family 6 subfamily C member 74
A6NCW0	0.35708	USP17L3	ubiquitin specific peptidase 17 like family member 3
A6NCW7	0.35852	USP17L4	ubiquitin specific peptidase 17 like family member 4
A6ND01	0.35573	IZUMO1R	IZUMO1 receptor, JUNO
A6ND36	0.606714	FAM83G	family with sequence similarity 83 member G
A6ND48	0.59949	OR14I1	olfactory receptor family 14 subfamily I member 1
A6ND91	0.56668	ASPDH	aspartate dehydrogenase domain containing
A6NDA9	0.58633	LRIT2	leucine rich repeat, Ig-like and transmembrane domains 2
A6NDB9	0.78177	PALM3	paralemmin 3
A6NDE4	0.5928	RBMY1B	RNA binding motif protein Y-linked family 1 member B
A6NDG6	0.8152	PGP	phosphoglycolate phosphatase
A6NDH6	0.60336	OR5H15	olfactory receptor family 5 subfamily H member 15
A6NDI0	0.36034	TRIM49B	tripartite motif containing 49B
A6NDK9	0.819477	GOLGA6C	golgin A6 family member C
A6NDL7	0.71519	METTL21EP	methyltransferase like 21E, pseudogene
A6NDL8	0.61644	OR6C68	olfactory receptor family 6 subfamily C member 68
A6NDN3	0.814587	GOLGA6B	golgin A6 family member B
A6NDN8	0.69974		Putative ubiquitin-like protein FUBI-like protein ENSP00000310146
A6NDP7	0.6102	MYADML2	myeloid associated differentiation marker like 2
A6NDR6	0.55168	MEIS3P1	Meis homeobox 3 pseudogene 1
A6NDS4	0.35866	TBC1D3B	TBC1 domain family member 3B
A6NDU8	0.53184	RIMOC1	RAB7A interacting MON1-CCZ1 complex subunit 1
A6NDV4	0.584848	TMEM8B	transmembrane protein 8B
A6NDX5	0.353241	ZNF840P	zinc finger protein 840, pseudogene
A6NDY0	0.5413	PABPN1L	PABPN1 like, cytoplasmic
A6NE01	0.665766	FAM186A	family with sequence similarity 186 member A
A6NE02	0.3733	BTBD17	BTB domain containing 17
A6NE52	0.613608	WDR97	WD repeat domain 97
A6NEC2	0.63577	NPEPPSL1	Puromycin-sensitive aminopeptidase-like protein (EC 3.4.11.-)
A6NED2	0.57944	RCCD1	RCC1 domain containing 1
A6NEE1	0.589571	PLEKHD1	pleckstrin homology and coiled-coil domain containing D1
A6NEF3	0.814617	GOLGA6L4	golgin A6 family like 4
A6NEH6	0.91164	TMEM247	transmembrane protein 247
A6NEK1	0.38362	ARRDC5	arrestin domain containing 5
A6NEL2	0.495686	SOWAHB	sosondowah ankyrin repeat domain family member B
A6NEM1	0.873164	GOLGA6L9	golgin A6 family like 9
A6NEN9	0.44711	CXorf65	chromosome X open reading frame 65
A6NEQ0	0.59123	RBMY1E	RNA binding motif protein Y-linked family 1 member E
A6NER0	0.3514	TBC1D3F	TBC1 domain family member 3F
A6NES4	0.506019	MROH2A	maestro heat like repeat family member 2A
A6NET4	0.55968	OR5K3	olfactory receptor family 5 subfamily K member 3
A6NEV1	0.45525	PRR23A	proline rich 23A
A6NEY3	0.832223	GOLGA6L3	Putative golgin subfamily A member 6-like protein 3
A6NEY8	0.8799	PRORSD1P	prolyl-tRNA synthetase associated domain containing 1, pseudogene
A6NF34	0.57972	ANTXRL	ANTXR like
A6NF36	0.73662	CCDC182	coiled-coil domain containing 182
A6NF89	0.62608	OR6C6	olfactory receptor family 6 subfamily C member 6
A6NFA1	0.46094	TRABD2B	TraB domain containing 2B
A6NFC5	0.66006	TMEM235	transmembrane protein 235
A6NFC9	0.53638	OR2W5P	olfactory receptor family 2 subfamily W member 5 pseudogene
A6NFD8	0.606056	HELT	helt bHLH transcription factor
A6NFE2	0.828304	SMCO2	single-pass membrane protein with coiled-coil domains 2
A6NFE3	0.524964	EFCAB10	EF-hand calcium binding domain 10
A6NFF2	0.62166	NAP1L6P	nucleosome assembly protein 1 like 6, pseudogene
A6NFH5	0.47062	FABP12	fatty acid binding protein 12
A6NFI3	0.37659	ZNF316	zinc finger protein 316
A6NFK2	0.39219	GRXCR2	glutaredoxin and cysteine rich domain containing 2
A6NFN3	0.6076	RBFOX3	RNA binding fox-1 homolog 3
A6NFN9	0.474552	ANKUB1	ankyrin repeat and ubiquitin domain containing 1
A6NFQ2	0.32218	TCAF2	TRPM8 channel associated factor 2
A6NFQ7	0.58789	DPRX	divergent-paired related homeobox
A6NFT4	0.43132	CFAP73	cilia and flagella associated protein 73
A6NFU0	0.35047	FAM187A	family with sequence similarity 187 member A
A6NFU8	0.47724	PGPEP1L	pyroglutamyl-peptidase I like
A6NFX1	0.84657	MFSD2B	MFSD2 lysolipid transporter B, sphingolipid
A6NFY4	0.391023	NEMP2	nuclear envelope integral membrane protein 2
A6NFY7	0.58406	SDHAF1	succinate dehydrogenase complex assembly factor 1
A6NG13	0.669258	MGAT4D	MGAT4 family member D
A6NGA9	0.69928	TMEM202	transmembrane protein 202
A6NGB0	0.800553	TMEM191C	transmembrane protein 191C
A6NGB7	0.57041	TMEM221	transmembrane protein 221
A6NGC4	0.55352	TLCD2	TLC domain containing 2
A6NGD5	0.364016	ZSCAN5C	zinc finger and SCAN domain containing 5C
A6NGE4	0.6671	DCAF8L1	DDB1 and CUL4 associated factor 8 like 1
A6NGE7	0.39858	URAD	ureidoimidazoline (2-oxo-4-hydroxy-4-carboxy-5-) decarboxylase
A6NGG8	0.804799	PCARE	photoreceptor cilium actin regulator
A6NGH7	0.76687	CCDC160	coiled-coil domain containing 160
A6NGH8	0.53454	ANKRD61	ankyrin repeat domain 61
A6NGJ6	0.384002	TRIM64	tripartite motif containing 64
A6NGN4	0.53717	PRAMEF25	PRAME family member 25
A6NGN9	0.48247	IGLON5	IgLON family member 5
A6NGQ2	0.54715	OOEP	oocyte expressed protein
A6NGR9	0.46939	MROH6	maestro heat like repeat family member 6
A6NGS2	0.66818	ERICH4	glutamate rich 4
A6NGU5	0.31828	GGT3P	gamma-glutamyltransferase 3 pseudogene
A6NGW2	0.527871	STRCP1	stereocilin pseudogene 1
A6NGY1	0.6118	FRG2C	FSHD region gene 2 family member C
A6NGY3	0.88561	C5orf52	chromosome 5 open reading frame 52
A6NGY5	0.59997	OR51F1	olfactory receptor family 51 subfamily F member 1
A6NH00	0.65039	OR2T8	olfactory receptor family 2 subfamily T member 8
A6NH11	0.44763	GLTPD2	glycolipid transfer protein domain containing 2
A6NH21	0.58845	SERINC4	serine incorporator 4
A6NH52	0.47817	TVP23A	trans-golgi network vesicle protein 23 homolog A
A6NH57	0.78485	ARL5C	ADP ribosylation factor like GTPase 5C
A6NHA9	0.59846	OR4C46	olfactory receptor family 4 subfamily C member 46
A6NHC0	0.348429	CAPN8	calpain 8
A6NHG4	0.48248	DDTL	D-dopachrome tautomerase like
A6NHG9	0.602	OR5H14	olfactory receptor family 5 subfamily H member 14
A6NHJ4	0.337704	ZNF860	zinc finger protein 860
A6NHL2	0.59879	TUBAL3	tubulin alpha like 3
A6NHM9	0.38345	MOXD2P	monooxygenase DBH like 2, pseudogene
A6NHN0	0.73071	OTOL1	otolin 1
A6NHP3	0.48977	SPDYE2B	speedy/RINGO cell cycle regulator family member E2B
A6NHQ2	0.93859	FBLL1	fibrillarin like 1
A6NHR9	0.590924	SMCHD1	structural maintenance of chromosomes flexible hinge domain containing 1
A6NHS7	0.39612	MANSC4	MANSC domain containing 4
A6NHT5	0.58719	HMX3	H6 family homeobox 3
A6NHX0	0.383	CASTOR2	cytosolic arginine sensor for mTORC1 subunit 2
A6NHY2	0.5007	ANKDD1B	ankyrin repeat and death domain containing 1B
A6NHZ5	0.45926	LRRC14B	leucine rich repeat containing 14B
A6NI03	0.395284	TRIM64B	tripartite motif containing 64B
A6NI15	0.50978	MSGN1	mesogenin 1
A6NI28	0.539196	ARHGAP42	Rho GTPase activating protein 42
A6NI47	0.50489	POTEM	POTE ankyrin domain family member M
A6NI56	0.743425	CCDC154	coiled-coil domain containing 154
A6NI61	0.6859	MYMK	myomaker, myoblast fusion factor
A6NI72	0.3936	NCF1B	neutrophil cytosolic factor 1B (pseudogene)
A6NI73	0.4287	LILRA5	leukocyte immunoglobulin like receptor A5
A6NI79	0.785431	CCDC69	coiled-coil domain containing 69
A6NI86	0.840447	GOLGA6L10	golgin A6 family like 10
A6NI87	0.86051	CBY3	chibby family member 3
A6NIE6	0.46877	RRN3P2	RRN3 pseudogene 2
A6NIE9	0.38746	PRSS29P	serine protease 29, pseudogene
A6NIH7	0.51367	UNC119B	unc-119 lipid binding chaperone B
A6NIJ9	0.61669	OR6C70	olfactory receptor family 6 subfamily C member 70
A6NIK2	0.83975	LRRC10B	leucine rich repeat containing 10B
A6NIM6	0.76201	SLC15A5	solute carrier family 15 member 5
A6NIN4	0.4286	RNF227	ring finger protein 227
A6NIR3	0.455831	AGAP5	ArfGAP with GTPase domain, ankyrin repeat and PH domain 5
A6NIV6	0.67262	LRRIQ4	leucine rich repeats and IQ motif containing 4
A6NIX2	0.467019	WTIP	WT1 interacting protein
A6NIY4	0.49275	SPDYE5	speedy/RINGO cell cycle regulator family member E5
A6NIZ1	0.91305		Ras-related protein Rap-1b-like protein
A6NJ46	0.58592	NKX6-3	NK6 homeobox 3
A6NJ64	0.89058	NPIPB2	nuclear pore complex interacting protein family member B2
A6NJ78	0.5003	METTL15	methyltransferase 15, mitochondrial 12S rRNA N4-cytidine
A6NJ88	0.418764	SAGE2P	sarcoma antigen 2, pseudogene
A6NJG2	0.44072	SOWAHD	sosondowah ankyrin repeat domain family member D
A6NJG6	0.59859	ARGFX	arginine-fifty homeobox
A6NJI9	0.66138	LRRC72	leucine rich repeat containing 72
A6NJJ6	0.41865	C19orf67	chromosome 19 open reading frame 67
A6NJL1	0.369337	ZSCAN5B	zinc finger and SCAN domain containing 5B
A6NJR5	0.48448		Putative speedy protein-like protein 3
A6NJT0	0.58186	UNCX	UNC homeobox
A6NJV1	0.43882	FAM166C	Protein FAM166C (Family with sequence similarity 166 member C)
A6NJW4	0.68056	LRRC3C	leucine rich repeat containing 3C
A6NJW9	0.61874	CD8B2	CD8B family member 2
A6NJY1	0.44527	SLC9B1P1	solute carrier family 9 member B1 pseudogene 1
A6NJY4	0.7686	TMEM238L	transmembrane protein 238 like
A6NJZ3	0.60965	OR6C65	olfactory receptor family 6 subfamily C member 65
A6NJZ7	0.653336	RIMBP3C	RIMS binding protein 3C
A6NK02	0.491174	TRIM75	tripartite motif containing 75
A6NK06	0.44329	ACOD1	aconitate decarboxylase 1
A6NK44	0.69326	GLOD5	glyoxalase domain containing 5
A6NK53	0.338731	ZNF233	zinc finger protein 233
A6NK58	0.68376	LIPT2	lipoyl(octanoyl) transferase 2
A6NK59	0.51455	ASB14	ankyrin repeat and SOCS box containing 14
A6NK75	0.3797	ZNF98	zinc finger protein 98
A6NK89	0.745654	RASSF10	Ras association domain family member 10
A6NK97	0.69016	SLC22A20P	solute carrier family 22 member 20, pseudogene
A6NKB5	0.403515	PCNX2	pecanex 2
A6NKC9	0.39866	SH2D7	SH2 domain containing 7
A6NKD2	0.39678	TSPY2	testis specific protein Y-linked 2
A6NKD9	0.78879	CCDC85C	coiled-coil domain containing 85C
A6NKF1	0.52509	SAC3D1	SAC3 domain containing 1
A6NKF2	0.45344	ARID3C	AT-rich interaction domain 3C
A6NKG5	0.423725	RTL1	retrotransposon Gag like 1
A6NKH3	0.86571	RPL37AP8	ribosomal protein L37a pseudogene 8
A6NKK0	0.60453	OR5H1	olfactory receptor family 5 subfamily H member 1
A6NKL6	0.77827	TMEM200C	transmembrane protein 200C
A6NKP2	0.87101	SDR42E2	short chain dehydrogenase/reductase family 42E, member 2
A6NKQ9	0.34557	CGB1	chorionic gonadotropin subunit beta 1
A6NKT7	0.459099	RGPD3	RANBP2 like and GRIP domain containing 3
A6NKU9	0.48379	SPDYE3	speedy/RINGO cell cycle regulator family member E3
A6NKW6	0.38508	SHISAL2B	shisa like 2B
A6NKX4	0.78696	SLC22A31	solute carrier family 22 member 31
A6NL08	0.58541	OR6C75	olfactory receptor family 6 subfamily C member 75
A6NL26	0.58717	OR5B21	olfactory receptor family 5 subfamily B member 21
A6NL88	0.34621	SHISA7	shisa family member 7
A6NL99	0.44581	AQP7P3	aquaporin 7 pseudogene 3
A6NLC8	0.59196	TAF11L2	TATA-box binding protein associated factor 11 like 2
A6NLF2	0.498335
A6NLI5	0.410929	TRIM64C	tripartite motif containing 64C
A6NLJ0	0.55246	C2CD4B	C2 calcium dependent domain containing 4B
A6NLP5	0.72501	TTC36	tetratricopeptide repeat domain 36
A6NLU0	0.33672	RFPL4A	ret finger protein like 4A
A6NLU5	0.72108	VSTM2B	V-set and transmembrane domain containing 2B
A6NLW8	0.557386	DUXA	double homeobox A
A6NLX3	0.49179	SPDYE4	speedy/RINGO cell cycle regulator family member E4
A6NM03	0.62997	OR2AG2	olfactory receptor family 2 subfamily AG member 2
A6NM10	0.38625	AQP12B	aquaporin 12B
A6NM11	0.678954	LRRC37A2	leucine rich repeat containing 37 member A2
A6NM28	0.395932	ZFP92	ZFP92 zinc finger protein
A6NM36	0.80029	LRRC30	leucine rich repeat containing 30
A6NM43	0.80392	CCT8L1P	chaperonin containing TCP1 subunit 8 like 1, pseudogene
A6NM45	0.60555	CLDN24	claudin 24
A6NM62	0.72467	LRRC53	leucine rich repeat containing 53
A6NM76	0.6213	OR6C76	olfactory receptor family 6 subfamily C member 76
A6NMB1	0.530281	SIGLEC16	sialic acid binding Ig like lectin 16
A6NMB9	0.83045	FIGNL2	fidgetin like 2
A6NMD0	0.66885	IFITM10	interferon induced transmembrane protein 10
A6NMD2	0.819781	GOLGA8J	golgin A8 family member J
A6NMK7	0.323103	CPSF4L	cleavage and polyadenylation specific factor 4 like
A6NMK8	0.68805	INSYN2B	inhibitory synaptic factor family member 2B
A6NML5	0.64956	TMEM212	transmembrane protein 212
A6NMN3	0.38342	FAM170B	family with sequence similarity 170 member B
A6NMS3	0.60055	OR5K4	olfactory receptor family 5 subfamily K member 4
A6NMS7	0.681705	LRRC37A	leucine rich repeat containing 37A
A6NMT0	0.59569	DBX1	developing brain homeobox 1
A6NMU1	0.60714	OR52A4P	olfactory receptor family 52 subfamily A member 4 pseudogene
A6NMX2	0.42598	EIF4E1B	eukaryotic translation initiation factor 4E family member 1B
A6NMY6	0.37944	ANXA2P2	annexin A2 pseudogene 2
A6NMZ2	0.44195	SNTN	sentan, cilia apical structure protein
A6NMZ5	0.5539	OR4C45	olfactory receptor family 4 subfamily C member 45 (gene/pseudogene)
A6NMZ7	0.522857	COL6A6	collagen type VI alpha 6 chain
A6NN14	0.372535	ZNF729	zinc finger protein 729
A6NN73	0.853887	GOLGA8CP	golgin A8 family member C, pseudogene
A6NN90	0.69113	C2orf81	chromosome 2 open reading frame 81
A6NN92	0.56352	GJE1	gap junction protein epsilon 1
A6NNA2	0.6806	SRRM3	serine/arginine repetitive matrix 3
A6NNA5	0.57471	DRGX	dorsal root ganglia homeobox
A6NNB3	0.80629	IFITM5	interferon induced transmembrane protein 5
A6NND4	0.60441	OR2AT4	olfactory receptor family 2 subfamily AT member 4
A6NNE9	0.62495	MARCHF11	membrane associated ring-CH-type finger 11
A6NNF4	0.375405	ZNF726	zinc finger protein 726
A6NNL0	0.453686	NUTM2B	NUT family member 2B
A6NNL5	0.37576	C15orf61	chromosome 15 open reading frame 61
A6NNM3	0.631592	RIMBP3B	RIMS binding protein 3B
A6NNM8	0.56817	TTLL13	tubulin tyrosine ligase like 13
A6NNN8	0.71975	SLC38A8	solute carrier family 38 member 8
A6NNP5	0.75346	CCDC169	coiled-coil domain containing 169
A6NNS2	0.81288	DHRS7C	dehydrogenase/reductase 7C
A6NNT2	0.857154	C16orf96	chromosome 16 open reading frame 96
A6NNV3	0.48419	SPDYE16	speedy/RINGO cell cycle regulator family member E16
A6NNW6	0.75682	ENO4	enolase 4
A6NNX1	0.44979	RIIAD1	regulatory subunit of type II PKA R-subunit domain containing 1
A6NNY8	0.37094	USP27X	ubiquitin specific peptidase 27 X-linked
A6NNZ2	0.61085	TUBB8B	tubulin beta 8B
A6NP11	0.381711	ZNF716	zinc finger protein 716
A6NP61	0.40419	ZAR1L	zygote arrest 1 like
A6PVC2	0.49584	TTLL8	tubulin tyrosine ligase like 8
A6PVI3	0.4311	NCBP2L	nuclear cap binding protein subunit 2 like
A6PVS8	0.627966	LRRIQ3	leucine rich repeats and IQ motif containing 3
A6QL63	0.398717	ABTB3	ankyrin repeat and BTB domain containing 3
A6QL64	0.685171	ANKRD36	ankyrin repeat domain 36
A6XGL0	0.49677	YJEFN3	YjeF N-terminal domain containing 3
A7E2F4	0.825082	GOLGA8A	golgin A8 family member A
A7E2S9	0.48954	ANKRD30BL	ankyrin repeat domain 30B like
A7E2U8	0.46743	C4orf47	UPF0602 protein C4orf47
A7E2V4	0.382881	ZSWIM8	zinc finger SWIM-type containing 8
A7E2Y1	0.494186	MYH7B	myosin heavy chain 7B
A7KAX9	0.456461	ARHGAP32	Rho GTPase activating protein 32
A7MBM2	0.374888	DISP2	dispatched RND transporter family member 2
A7MCY6	0.859472	TBKBP1	TBK1 binding protein 1
A7XYQ1	0.557069	SOBP	sine oculis binding protein homolog
A8K0R7	0.41042	ZNF839	zinc finger protein 839
[truncated: 17,429 more rows]

## Sheet: Homo_sapiens_to_Cvibrioides
UniProt ID	Structural Conservative Scores	Gene Symbol	Gene Full Name
[truncated: 18,233 more rows]
