# Supplementary material for: Proteome-wide structural analysis quantifies structural conservation across distant species
Source: HighWire-hosted journal article supplement (doi:10.1101/gr.277771.123), 2023-11-01
Supplement: Supplemental_Table_S5.xlsx [file Supplemental_Table_S5.xlsx]

## Sheet: Gene_sets
Supplemental Table S5: Human gene sets used in the gene set enrichment analysis. The gene sets were derived based on KEGG pathways or modules
Glycolysis		Gluconeogenesis		Pyruvate Oxidation		Branched Chain Amino Acid (BCAA) Synthesis		Glycolysis and Gluconeogenesis (for GSEA analysis)		Pyruvate Metabolism		Fatty Acid Metabolism		Ribosome		Proteasome		Basal Transcription Factors		RNA polymerase		DNA replication		Histones (DNA storage)
KEGG module: HSA_M00001		KEGG module: HSA_M00003		KEGG module: HSA_M00307		KEGG pathway: HSA00290		KEGG pathway: HSA00010		KEGG pathway: HSA00620		KEGG pathway: HSA00071		KEGG pathway: HSA03010		KEGG pathway: HSA03050		KEGG pathway: HSA03022		KEGG pathway: HSA03020		KEGG pathway: HSA03030		No KEGG reference, mannually curated
HK1	hexokinase 1	PCK1	phosphoenolpyruvate carboxykinase 1	PDHA2	pyruvate dehydrogenase E1 subunit alpha 2	SDS	serine dehydratase	ACSS1	acyl-CoA synthetase short chain family member 1	ACACA	acetyl-CoA carboxylase alpha	ACAA1	acetyl-CoA acyltransferase 1	FAU	FAU ubiquitin like and ribosomal protein S30 fusion	IFNG	interferon gamma	GTF2A1	general transcription factor IIA subunit 1	POLR1A	RNA polymerase I subunit A	DNA2	DNA replication helicase/nuclease 2	H1-0	H1.0 linker histone
HK2	hexokinase 2	PCK2	phosphoenolpyruvate carboxykinase 2, mitochondrial	PDHA1	pyruvate dehydrogenase E1 subunit alpha 1	SDSL	serine dehydratase like	ACSS2	acyl-CoA synthetase short chain family member 2	ACACB	acetyl-CoA carboxylase beta	ACAA2	acetyl-CoA acyltransferase 2	MRPL13	mitochondrial ribosomal protein L13	POMP	proteasome maturation protein	GTF2A1L	general transcription factor IIA subunit 1 like	POLR1B	RNA polymerase I subunit B	FEN1	flap structure-specific endonuclease 1	H1-7	H1.7 linker histone
HK3	hexokinase 3	ENO3	enolase 3	PDHB	pyruvate dehydrogenase E1 subunit beta	BCAT1	branched chain amino acid transaminase 1	ADH1A	alcohol dehydrogenase 1A (class I), alpha polypeptide	ACAT1	acetyl-CoA acetyltransferase 1	ACADL	acyl-CoA dehydrogenase long chain	RPL10	ribosomal protein L10	PSMA1	proteasome 20S subunit alpha 1	GTF2A2	general transcription factor IIA subunit 2	POLR1C	RNA polymerase I and III subunit C	LIG1	DNA ligase 1	H1-8	H1.8 linker histone
HKDC1	hexokinase domain containing 1	ENO2	enolase 2	DLAT	dihydrolipoamide S-acetyltransferase	BCAT2	branched chain amino acid transaminase 2	ADH1B	alcohol dehydrogenase 1B (class I), beta polypeptide	ACAT2	acetyl-CoA acetyltransferase 2	ACADM	acyl-CoA dehydrogenase medium chain	RPL10A	ribosomal protein L10a	PSMA2	proteasome 20S subunit alpha 2	GTF2B	general transcription factor IIB	POLR1D	RNA polymerase I and III subunit D	MCM2	minichromosome maintenance complex component 2	H1-10	H1.10 linker histone
GCK	glucokinase	ENO1	enolase 1	DLD	dihydrolipoamide dehydrogenase			ADH1C	alcohol dehydrogenase 1C (class I), gamma polypeptide	ACOT12	acyl-CoA thioesterase 12	ACADS	acyl-CoA dehydrogenase short chain	RPL10L	ribosomal protein L10 like	PSMA3	proteasome 20S subunit alpha 3	GTF2E1	general transcription factor IIE subunit 1	POLR1E	RNA polymerase I subunit E	MCM3	minichromosome maintenance complex component 3	H1-1	H1.1 linker histone, cluster member
ADPGK	ADP dependent glucokinase	ENO4	enolase 4	PDHX	pyruvate dehydrogenase complex component X			ADH4	alcohol dehydrogenase 4 (class II), pi polypeptide	ACSS1	acyl-CoA synthetase short chain family member 1	ACADSB	acyl-CoA dehydrogenase short/branched chain	RPL11	ribosomal protein L11	PSMA4	proteasome 20S subunit alpha 4	GTF2E2	general transcription factor IIE subunit 2	POLR1H	RNA polymerase I subunit H	MCM4	minichromosome maintenance complex component 4	H1-5	H1.5 linker histone, cluster member
GPI	glucose-6-phosphate isomerase	PGAM1	phosphoglycerate mutase 1					ADH5	alcohol dehydrogenase 5 (class III), chi polypeptide	ACSS2	acyl-CoA synthetase short chain family member 2	ACADVL	acyl-CoA dehydrogenase very long chain	RPL12	ribosomal protein L12	PSMA5	proteasome 20S subunit alpha 5	GTF2F1	general transcription factor IIF subunit 1	POLR2A	RNA polymerase II subunit A	MCM5	minichromosome maintenance complex component 5	H1-2	H1.2 linker histone, cluster member
PFKM	phosphofructokinase, muscle	PGAM2	phosphoglycerate mutase 2					ADH6	alcohol dehydrogenase 6 (class V)	ACYP1	acylphosphatase 1	ACAT1	acetyl-CoA acetyltransferase 1	RPL13	ribosomal protein L13	PSMA6	proteasome 20S subunit alpha 6	GTF2F2	general transcription factor IIF subunit 2	POLR2B	RNA polymerase II subunit B	MCM6	minichromosome maintenance complex component 6	H1-3	H1.3 linker histone, cluster member
PFKP	phosphofructokinase, platelet	PGAM4	phosphoglycerate mutase family member 4					ADH7	alcohol dehydrogenase 7 (class IV), mu or sigma polypeptide	ACYP2	acylphosphatase 2	ACAT2	acetyl-CoA acetyltransferase 2	RPL13A	ribosomal protein L13a	PSMA7	proteasome 20S subunit alpha 7	GTF2H1	general transcription factor IIH subunit 1	POLR2C	RNA polymerase II subunit C	MCM7	minichromosome maintenance complex component 7	H1-4	H1.4 linker histone, cluster member
PFKL	phosphofructokinase, liver type	PGK2	phosphoglycerate kinase 2					AKR1A1	aldo-keto reductase family 1 member A1	AKR1B1	aldo-keto reductase family 1 member B	ACOX1	acyl-CoA oxidase 1	RPL14	ribosomal protein L14	PSMA8	proteasome 20S subunit alpha 8	GTF2H2	general transcription factor IIH subunit 2	POLR2D	RNA polymerase II subunit D	PCNA	proliferating cell nuclear antigen	H1-6	H1.6 linker histone, cluster member
ALDOA	aldolase, fructose-bisphosphate A	PGK1	phosphoglycerate kinase 1					ALDH1A3	aldehyde dehydrogenase 1 family member A3	ALDH1B1	aldehyde dehydrogenase 1 family member B1	ACOX3	acyl-CoA oxidase 3, pristanoyl	RPL15	ribosomal protein L15	PSMB1	proteasome 20S subunit beta 1	GTF2H3	general transcription factor IIH subunit 3	POLR2E	RNA polymerase II, I and III subunit E	POLA1	DNA polymerase alpha 1, catalytic subunit	H2AB1	H2A.B variant histone 1
ALDOB	aldolase, fructose-bisphosphate B	GAPDH	glyceraldehyde-3-phosphate dehydrogenase					ALDH1B1	aldehyde dehydrogenase 1 family member B1	ALDH2	aldehyde dehydrogenase 2 family member	ACSL1	acyl-CoA synthetase long chain family member 1	RPL17	ribosomal protein L17	PSMB10	proteasome 20S subunit beta 10	GTF2H4	general transcription factor IIH subunit 4	POLR2F	RNA polymerase II, I and III subunit F	POLA2	DNA polymerase alpha 2, accessory subunit	H2AB2	H2A.B variant histone 2
ALDOC	aldolase, fructose-bisphosphate C	TPI1	triosephosphate isomerase 1					ALDH2	aldehyde dehydrogenase 2 family member	ALDH3A2	aldehyde dehydrogenase 3 family member A2	ACSL3	acyl-CoA synthetase long chain family member 3	RPL18	ribosomal protein L18	PSMB11	proteasome subunit beta 11	GTF2I	general transcription factor IIi	POLR2G	RNA polymerase II subunit G	POLD1	DNA polymerase delta 1, catalytic subunit	H2AB3	H2A.B variant histone 3
TPI1	triosephosphate isomerase 1	ALDOA	aldolase, fructose-bisphosphate A					ALDH3A1	aldehyde dehydrogenase 3 family member A1	ALDH7A1	aldehyde dehydrogenase 7 family member A1	ACSL4	acyl-CoA synthetase long chain family member 4	RPL18A	ribosomal protein L18a	PSMB2	proteasome 20S subunit beta 2	GTF2IRD1	GTF2I repeat domain containing 1	POLR2H	RNA polymerase II, I and III subunit H	POLD2	DNA polymerase delta 2, accessory subunit	H2AJ	H2A.J histone
GAPDH	glyceraldehyde-3-phosphate dehydrogenase	ALDOB	aldolase, fructose-bisphosphate B					ALDH3A2	aldehyde dehydrogenase 3 family member A2	ALDH9A1	aldehyde dehydrogenase 9 family member A1	ACSL5	acyl-CoA synthetase long chain family member 5	RPL19	ribosomal protein L19	PSMB3	proteasome 20S subunit beta 3	STON1	stonin 1	POLR2I	RNA polymerase II subunit I	POLD3	DNA polymerase delta 3, accessory subunit	H2AZ2	H2A.Z variant histone 2
PGK2	phosphoglycerate kinase 2	ALDOC	aldolase, fructose-bisphosphate C					ALDH3B1	aldehyde dehydrogenase 3 family member B1	DLAT	dihydrolipoamide S-acetyltransferase	ACSL6	acyl-CoA synthetase long chain family member 6	RPL21	ribosomal protein L21	PSMB4	proteasome 20S subunit beta 4	TAF1	TATA-box binding protein associated factor 1	POLR2J	RNA polymerase II subunit J	POLD4	DNA polymerase delta 4, accessory subunit	H2AX	H2A.X variant histone
PGK1	phosphoglycerate kinase 1	FBP1	fructose-bisphosphatase 1					ALDH3B2	aldehyde dehydrogenase 3 family member B2	DLD	dihydrolipoamide dehydrogenase	ADH1A	alcohol dehydrogenase 1A (class I), alpha polypeptide	RPL22	ribosomal protein L22	PSMB5	proteasome 20S subunit beta 5	TAF10	TATA-box binding protein associated factor 10	POLR2J2	RNA polymerase II subunit J2	POLE	DNA polymerase epsilon, catalytic subunit	MACROH2A1	macroH2A.1 histone
PGAM1	phosphoglycerate mutase 1	FBP2	fructose-bisphosphatase 2					ALDH7A1	aldehyde dehydrogenase 7 family member A1	GLO1	glyoxalase I	ADH1B	alcohol dehydrogenase 1B (class I), beta polypeptide	RPL22L1	ribosomal protein L22 like 1	PSMB6	proteasome 20S subunit beta 6	TAF11	TATA-box binding protein associated factor 11	POLR2J3	RNA polymerase II subunit J3	POLE2	DNA polymerase epsilon 2, accessory subunit	MACROH2A2	macroH2A.2 histone
PGAM2	phosphoglycerate mutase 2							ALDH9A1	aldehyde dehydrogenase 9 family member A1	GRHPR	glyoxylate and hydroxypyruvate reductase	ADH1C	alcohol dehydrogenase 1C (class I), gamma polypeptide	RPL23	ribosomal protein L23	PSMB7	proteasome 20S subunit beta 7	TAF12	TATA-box binding protein associated factor 12	POLR2L	RNA polymerase II, I and III subunit L	POLE3	DNA polymerase epsilon 3, accessory subunit	H2AZ1	H2A.Z variant histone 1
PGAM4	phosphoglycerate mutase family member 4							ALDOA	aldolase, fructose-bisphosphate A	HAGH	hydroxyacylglutathione hydrolase	ADH4	alcohol dehydrogenase 4 (class II), pi polypeptide	RPL23A	ribosomal protein L23a	PSMB8	proteasome 20S subunit beta 8	TAF13	TATA-box binding protein associated factor 13	POLR3A	RNA polymerase III subunit A	POLE4	DNA polymerase epsilon 4, accessory subunit	H2AC1	H2A clustered histone 1
ENO3	enolase 3							ALDOB	aldolase, fructose-bisphosphate B	HAGHL	hydroxyacylglutathione hydrolase like	ADH5	alcohol dehydrogenase 5 (class III), chi polypeptide	RPL24	ribosomal protein L24	PSMB9	proteasome 20S subunit beta 9	TAF1L	TATA-box binding protein associated factor 1 like	POLR3B	RNA polymerase III subunit B	PRIM1	DNA primase subunit 1	H2AC4	H2A clustered histone 4
ENO2	enolase 2							ALDOC	aldolase, fructose-bisphosphate C	LDHA	lactate dehydrogenase A	ADH6	alcohol dehydrogenase 6 (class V)	RPL26	ribosomal protein L26	PSMC1	proteasome 26S subunit, ATPase 1	TAF2	TATA-box binding protein associated factor 2	POLR3C	RNA polymerase III subunit C	PRIM2	DNA primase subunit 2	H2AC6	H2A clustered histone 6
ENO1	enolase 1							BPGM	bisphosphoglycerate mutase	LDHAL6A	lactate dehydrogenase A like 6A	ADH7	alcohol dehydrogenase 7 (class IV), mu or sigma polypeptide	RPL26L1	ribosomal protein L26 like 1	PSMC2	proteasome 26S subunit, ATPase 2	TAF4	TATA-box binding protein associated factor 4	POLR3D	RNA polymerase III subunit D	RFC1	replication factor C subunit 1	H2AC7	H2A clustered histone 7
ENO4	enolase 4							DLAT	dihydrolipoamide S-acetyltransferase	LDHAL6B	lactate dehydrogenase A like 6B	ALDH1B1	aldehyde dehydrogenase 1 family member B1	RPL27	ribosomal protein L27	PSMC3	proteasome 26S subunit, ATPase 3	TAF4B	TATA-box binding protein associated factor 4b	POLR3F	RNA polymerase III subunit F	RFC2	replication factor C subunit 2	H2AC8	H2A clustered histone 8
PKM	pyruvate kinase M1/2							DLD	dihydrolipoamide dehydrogenase	LDHB	lactate dehydrogenase B	ALDH2	aldehyde dehydrogenase 2 family member	RPL27A	ribosomal protein L27a	PSMC4	proteasome 26S subunit, ATPase 4	TAF5	TATA-box binding protein associated factor 5	POLR3G	RNA polymerase III subunit G	RFC3	replication factor C subunit 3	H2AC11	H2A clustered histone 11
PKLR	pyruvate kinase L/R							ENO1	enolase 1	LDHC	lactate dehydrogenase C	ALDH3A2	aldehyde dehydrogenase 3 family member A2	RPL28	ribosomal protein L28	PSMC5	proteasome 26S subunit, ATPase 5	TAF5L	TATA-box binding protein associated factor 5 like	POLR3GL	RNA polymerase III subunit GL	RFC4	replication factor C subunit 4	H2AC13	H2A clustered histone 13
								ENO2	enolase 2	LDHD	lactate dehydrogenase D	ALDH7A1	aldehyde dehydrogenase 7 family member A1	RPL29	ribosomal protein L29	PSMC6	proteasome 26S subunit, ATPase 6	TAF6	TATA-box binding protein associated factor 6	POLR3H	RNA polymerase III subunit H	RFC5	replication factor C subunit 5	H2AC14	H2A clustered histone 14
								ENO3	enolase 3	MDH1	malate dehydrogenase 1	ALDH9A1	aldehyde dehydrogenase 9 family member A1	RPL3	ribosomal protein L3	PSMD1	proteasome 26S subunit, non-ATPase 1	TAF6L	TATA-box binding protein associated factor 6 like	POLR3K	RNA polymerase III subunit K	RNASEH1	ribonuclease H1	H2AC15	H2A clustered histone 15
								FBP1	fructose-bisphosphatase 1	MDH2	malate dehydrogenase 2	CPT1A	carnitine palmitoyltransferase 1A	RPL30	ribosomal protein L30	PSMD11	proteasome 26S subunit, non-ATPase 11	TAF7	TATA-box binding protein associated factor 7			RNASEH2A	ribonuclease H2 subunit A	H2AC16	H2A clustered histone 16
								FBP2	fructose-bisphosphatase 2	ME1	malic enzyme 1	CPT1B	carnitine palmitoyltransferase 1B	RPL31	ribosomal protein L31	PSMD12	proteasome 26S subunit, non-ATPase 12	TAF7L	TATA-box binding protein associated factor 7 like			RNASEH2B	ribonuclease H2 subunit B	H2AC17	H2A clustered histone 17
								G6PC1	glucose-6-phosphatase catalytic subunit 1	ME2	malic enzyme 2	CPT1C	carnitine palmitoyltransferase 1C	RPL32	ribosomal protein L32	PSMD13	proteasome 26S subunit, non-ATPase 13	TAF9	TATA-box binding protein associated factor 9			RNASEH2C	ribonuclease H2 subunit C	H2AC18	H2A clustered histone 18
								G6PC2	glucose-6-phosphatase catalytic subunit 2	ME3	malic enzyme 3	CPT2	carnitine palmitoyltransferase 2	RPL34	ribosomal protein L34	PSMD14	proteasome 26S subunit, non-ATPase 14	TAF9B	TATA-box binding protein associated factor 9b			RPA1	replication protein A1	H2AC20	H2A clustered histone 20
								GALM	galactose mutarotase	PC	pyruvate carboxylase	CYP4A11	cytochrome P450 family 4 subfamily A member 11	RPL35	ribosomal protein L35	PSMD2	proteasome 26S subunit ubiquitin receptor, non-ATPase 2	TBP	TATA-box binding protein			RPA2	replication protein A2	H2BW2	H2B.W histone 2
								GAPDH	glyceraldehyde-3-phosphate dehydrogenase	PCK1	phosphoenolpyruvate carboxykinase 1	CYP4A22	cytochrome P450 family 4 subfamily A member 22	RPL35A	ribosomal protein L35a	PSMD3	proteasome 26S subunit, non-ATPase 3	TBPL1	TATA-box binding protein like 1			RPA3	replication protein A3	H2BC12L	H2B clustered histone 12 like
								GCK	glucokinase	PCK2	phosphoenolpyruvate carboxykinase 2, mitochondrial	ECHS1	enoyl-CoA hydratase, short chain 1	RPL36	ribosomal protein L36	PSMD4	proteasome 26S subunit ubiquitin receptor, non-ATPase 4	TBPL2	TATA-box binding protein like 2			RPA4	replication protein A4	H2BW1	H2B.W histone 1
								GPI	glucose-6-phosphate isomerase	PDHA1	pyruvate dehydrogenase E1 subunit alpha 1	ECI1	enoyl-CoA delta isomerase 1	RPL36A	ribosomal protein L36a	PSMD6	proteasome 26S subunit, non-ATPase 6					SSBP1	single stranded DNA binding protein 1	H2BC1	H2B clustered histone 1
								HK1	hexokinase 1	PDHA2	pyruvate dehydrogenase E1 subunit alpha 2	ECI2	enoyl-CoA delta isomerase 2	RPL36AL	ribosomal protein L36a like	PSMD7	proteasome 26S subunit, non-ATPase 7							H2BC3	H2B clustered histone 3
								HK2	hexokinase 2	PDHB	pyruvate dehydrogenase E1 subunit beta	EHHADH	enoyl-CoA hydratase and 3-hydroxyacyl CoA dehydrogenase	RPL37	ribosomal protein L37	PSMD8	proteasome 26S subunit, non-ATPase 8							H2BC4	H2B clustered histone 4
								HK3	hexokinase 3	PKLR	pyruvate kinase L/R	GCDH	glutaryl-CoA dehydrogenase	RPL37A	ribosomal protein L37a	PSME1	proteasome activator subunit 1							H2BC5	H2B clustered histone 5
								LDHA	lactate dehydrogenase A	PKM	pyruvate kinase M1/2	HADH	hydroxyacyl-CoA dehydrogenase	RPL38	ribosomal protein L38	PSME2	proteasome activator subunit 2							H2BC6	H2B clustered histone 6
								LDHAL6A	lactate dehydrogenase A like 6A			HADHA	hydroxyacyl-CoA dehydrogenase trifunctional multienzyme complex subunit alpha	RPL39	ribosomal protein L39	PSME3	proteasome activator subunit 3							H2BC7	H2B clustered histone 7
								LDHAL6B	lactate dehydrogenase A like 6B			HADHB	hydroxyacyl-CoA dehydrogenase trifunctional multienzyme complex subunit beta	RPL3L	ribosomal protein L3 like	PSME4	proteasome activator subunit 4							H2BC8	H2B clustered histone 8
								LDHB	lactate dehydrogenase B					RPL4	ribosomal protein L4	PSMF1	proteasome inhibitor subunit 1							H2BC9	H2B clustered histone 9
								LDHC	lactate dehydrogenase C					RPL5	ribosomal protein L5									H2BC10	H2B clustered histone 10
								PCK1	phosphoenolpyruvate carboxykinase 1					RPL6	ribosomal protein L6									H2BC11	H2B clustered histone 11
								PCK2	phosphoenolpyruvate carboxykinase 2, mitochondrial					RPL7	ribosomal protein L7									H2BC12	H2B clustered histone 12
								PDHA1	pyruvate dehydrogenase E1 subunit alpha 1					RPL7A	ribosomal protein L7a									H2BC13	H2B clustered histone 13
								PDHA2	pyruvate dehydrogenase E1 subunit alpha 2					RPL8	ribosomal protein L8									H2BC14	H2B clustered histone 14
								PDHB	pyruvate dehydrogenase E1 subunit beta					RPLP0	ribosomal protein lateral stalk subunit P0									H2BC15	H2B clustered histone 15
								PFKL	phosphofructokinase, liver type					RPLP1	ribosomal protein lateral stalk subunit P1									H2BC17	H2B clustered histone 17
								PFKM	phosphofructokinase, muscle					RPLP2	ribosomal protein lateral stalk subunit P2									H2BC21	H2B clustered histone 21
								PFKP	phosphofructokinase, platelet					RPS10	ribosomal protein S10									H3C1	H3 clustered histone 1
								PGAM1	phosphoglycerate mutase 1					RPS11	ribosomal protein S11									H3C2	H3 clustered histone 2
								PGAM2	phosphoglycerate mutase 2					RPS12	ribosomal protein S12									H3C3	H3 clustered histone 3
								PGAM4	phosphoglycerate mutase family member 4					RPS13	ribosomal protein S13									H3C4	H3 clustered histone 4
								PGK1	phosphoglycerate kinase 1					RPS15	ribosomal protein S15									H3C6	H3 clustered histone 6
								PGK2	phosphoglycerate kinase 2					RPS15A	ribosomal protein S15a									H3C7	H3 clustered histone 7
								PGM1	phosphoglucomutase 1					RPS16	ribosomal protein S16									H3C8	H3 clustered histone 8
								PGM2	phosphoglucomutase 2					RPS17	ribosomal protein S17									H3C10	H3 clustered histone 10
								PKLR	pyruvate kinase L/R					RPS18	ribosomal protein S18									H3C11	H3 clustered histone 11
								PKM	pyruvate kinase M1/2					RPS19	ribosomal protein S19									H3C12	H3 clustered histone 12
								TPI1	triosephosphate isomerase 1					RPS2	ribosomal protein S2									H3C14	H3 clustered histone 14
														RPS20	ribosomal protein S20									H3-4	H3.4 histone, cluster member
														RPS21	ribosomal protein S21									H4C1	H4 clustered histone 1
														RPS23	ribosomal protein S23									H4C2	H4 clustered histone 2
														RPS24	ribosomal protein S24									H4C3	H4 clustered histone 3
														RPS25	ribosomal protein S25									H4C4	H4 clustered histone 4
														RPS26	ribosomal protein S26									H4C5	H4 clustered histone 5
														RPS27	ribosomal protein S27									H4C6	H4 clustered histone 6
														RPS27A	ribosomal protein S27a									H4C7	H4 clustered histone 7
														RPS27L	ribosomal protein S27 like									H4C8	H4 clustered histone 8
														RPS28	ribosomal protein S28									H4C9	H4 clustered histone 9
														RPS29	ribosomal protein S29									H4C11	H4 clustered histone 11
														RPS3	ribosomal protein S3									H4C12	H4 clustered histone 12
														RPS3A	ribosomal protein S3A									H4C13	H4 clustered histone 13
														RPS4X	ribosomal protein S4 X-linked									H4C16	H4 histone 16
														RPS4Y1	ribosomal protein S4 Y-linked 1
														RPS5	ribosomal protein S5
														RPS6	ribosomal protein S6
														RPS7	ribosomal protein S7
														RPS8	ribosomal protein S8
														RPS9	ribosomal protein S9
														RPSA	ribosomal protein SA
														RSL24D1	ribosomal L24 domain containing 1
														UBA52	ubiquitin A-52 residue ribosomal protein fusion product 1
