# Supplementary material for: Proteome-wide structural analysis quantifies structural conservation across distant species
Source: HighWire-hosted journal article supplement (doi:10.1101/gr.277771.123), 2023-11-01
Supplement: Supplemental_Table_S6.xlsx [file Supplemental_Table_S6.xlsx]

## Sheet: ribosome_pairs_TMscores.tsv
Supplemental Table S6: List of structural similarity scores between the ribosome subunits of M. jannaschii ribosome subunits and the annotated orthologs of H. sapiens and E. coli
M. jannaschii ribosome subunits	H. sapiens cytosolic ribosome subunits	Structural similarity: H. sapiens cytosolic vs. M. jannaschii						H. sapiens mitochondrial ribosome subunits	Structural similarity: H. sapiens mitochondrial vs. M. jannaschii	E. coli ribosome subunits	Structural similarity: E. coli vs. M. jannaschii
rpl1	RPL10A	0.87						MRPL1	0.5	rplA	0.72	Large Subunit
rpl2	RPL8	0.15						MRPL2	0.12	rplB	0.14
rpl3	RPL3	0.79						MRPL3	0.55	rplC	0.52
rpl4	RPL4	0.58						MRPL4	0.58	rplD	0.69
rpl5	RPL11	0.87							N/A	rplE	0.75
rpl6	RPL9	0.89							N/A	rplF	0.78
rpl10	RPLP0	0.64						MRPL10	0.36	rplJ	0.33
rpl11	RPL12	0.73						MRPL11	0.61	rplK	0.74
rpl12	RPLP1/RPLP2	0.51			0.48				N/A		N/A
rpl13	RPL13A	0.65						MRPL13	0.51	rplM	0.62
rpl14	RPL23	0.9						MRPL14	0.17	rplN	0.82
rpl15	RPL27A	0.77						MRPL15	0.34	rplO	0.59
rpl10e	RPL10/RPL10L	0.74			0.74			MRPL16	0.42	rplP	0.59
rpl18	RPL5	0.63						MRPL18	0.48	rplR	0.52
rpl22	RPL17	0.8						MRPL22	0.54	rplV	0.67
rpl23	RPL23A	0.54						MRPL23	0.43	rplW	0.73
rpl24	RPL26/RPL26L1	0.77			0.77			MRPL24	0.31	rplX	0.5
rpl29	RPL35	0.52							N/A	rpmC	0.85
rpl30	RPL7	0.57						MRPL30	0.4	rpmD	0.36
rpl7ae	RPL7A	0.41							N/A		N/A
rpl14e	RPL14	0.36							N/A		N/A
rpl15e	RPL15	0.89							N/A		N/A
rpl18e	RPL18	0.6							N/A		N/A
rpl18a	RPL18A	0.41							N/A		N/A
rpl19e	RPL19	0.72							N/A		N/A
rpl21e	RPL21	0.57							N/A		N/A
rpl24e	RPL24/RSL24D1	0.38			0.36				N/A		N/A
rpl30e	RPL30	0.85							N/A		N/A
rpl31e	RPL31	0.63							N/A		N/A
rpl32e	RPL32	0.75							N/A		N/A
rpl34e	RPL34	0.65							N/A		N/A
rpl44e	RPL36A/RPL36AL	0.81			0.8				N/A		N/A
rpl37e	RPL37	0.52							N/A		N/A
rpl37ae	RPL37A	0.91							N/A		N/A
rpl39e	RPL39	0.8							N/A		N/A
rpl40e	UBA52	0.32							N/A		N/A
rpl41e	RPL41	0.62							N/A		N/A
rps2	RPSA	0.65						MRPS2	0.54	rpsB	0.66	Small Subunit
rps3	RPS3	0.81							N/A	rpsC	0.69
rps4	RPS9	0.8							N/A	rpsD	0.51
rps5	RPS2	0.66						MRPS5	0.35	rpsE	0.67
rps7	RPS5	0.92						MRPS7	0.53	rpsG	0.67
rps8	RPS15A	0.98							N/A	rpsH	0.88
rps9	RPS16	0.87						MRPS9	0.3	rpsI	0.82
rps10	RPS20	0.77						MRPS10	0.45	rpsJ	0.89
rps11	RPS14	0.81						MRPS11	0.55	rpsK	0.81
rps12	RPS23	0.93						MRPS12	0.62	rpsL	0.61
rps13	RPS18	0.86							N/A	rpsM	0.69
rps14	RPS29	0.79						MRPS14	0.31	rpsN	0.37
rps15	RPS13	0.96						MRPS15	0.23	rpsO	0.38
rps17	RPS11	0.67						MRPS17	0.59	rpsQ	0.64
rps19	RPS15	0.74							N/A	rpsS	0.5
rps3ae	RPS3A	0.73							N/A		N/A
rps4e	RPS4Y2/RPS4X/RPS4Y1	0.87		0.86		0.87			N/A		N/A
rps6e	RPS6	0.45							N/A		N/A
rps8e	RPS8	0.59							N/A		N/A
rps17e	RPS17	0.45							N/A		N/A
rps19e	RPS19	0.93							N/A		N/A
rps24e	RPS24	0.61							N/A		N/A
rps27e	RPS27/RPS27L	0.65			0.66				N/A		N/A
rps27ae	RPS27A	0.32							N/A		N/A
rps28e	RPS28	0.77							N/A		N/A
