# Supplementary material for: Proteome-wide structural analysis quantifies structural conservation across distant species
Source: HighWire-hosted journal article supplement (doi:10.1101/gr.277771.123), 2023-11-01
Supplement: Supplemental_Table_S7.xlsx [file Supplemental_Table_S7.xlsx]

## Sheet: conserved_and_nonconserved
Supplemental Table S7: Lists of structurally conserved and non-conserved genes.
conserved to E. coli structures only			conserved to M. jannaschii structures only			non-conserved			conserved to both			conserved to both: closer to E. coli			conserved to both: closer to M. jannaschii			conserved to both: similar scores
Q8IYI0	SHLD1	shieldin complex subunit 1	O00519	FAAH	fatty acid amide hydrolase	Q13444	ADAM15	ADAM metallopeptidase domain 15	Q9H9P8	L2HGDH	L-2-hydroxyglutarate dehydrogenase	Q9H9P8	L2HGDH	L-2-hydroxyglutarate dehydrogenase	Q9BY41	HDAC8	histone deacetylase 8	Q15075	EEA1	early endosome antigen 1
Q6P988	NOTUM	notum, palmitoleoyl-protein carboxylesterase	Q13287	NMI	N-myc and STAT interactor	Q6ZTN6	ANKRD13D	ankyrin repeat domain 13D	Q13303	KCNAB2	potassium voltage-gated channel subfamily A regulatory beta subunit 2	Q13303	KCNAB2	potassium voltage-gated channel subfamily A regulatory beta subunit 2	P20226	TBP	TATA-box binding protein	Q6QNY1	BLOC1S2	biogenesis of lysosomal organelles complex 1 subunit 2
Q86UR5	RIMS1	regulating synaptic membrane exocytosis 1	O95478	NSA2	NSA2 ribosome biogenesis factor	Q2TAA8	TSNAXIP1	translin associated factor X interacting protein 1	Q15653	NFKBIB	NFKB inhibitor beta	Q15653	NFKBIB	NFKB inhibitor beta	Q8TAM1	BBS10	Bardet-Biedl syndrome 10	Q86SQ0	PHLDB2	pleckstrin homology like domain family B member 2
Q9BTE6	AARSD1	alanyl-tRNA synthetase domain containing 1	A6NLC8	TAF11L2	TATA-box binding protein associated factor 11 like 2	Q9BYD5	CNFN	cornifelin	Q8NCK7	SLC16A11	solute carrier family 16 member 11	Q8NCK7	SLC16A11	solute carrier family 16 member 11	Q8TF09	DYNLRB2	dynein light chain roadblock-type 2	Q6P474	PDXDC2P	pyridoxal dependent decarboxylase domain containing 2, pseudogene
Q9Y3D6	FIS1	fission, mitochondrial 1	Q9Y5R8	TRAPPC1	trafficking protein particle complex subunit 1	Q13642	FHL1	four and a half LIM domains 1	P06744	GPI	glucose-6-phosphate isomerase	P06744	GPI	glucose-6-phosphate isomerase	Q92526	CCT6B	chaperonin containing TCP1 subunit 6B	A6NJG2	SOWAHD	sosondowah ankyrin repeat domain family member D
Q9Y678	COPG1	COPI coat complex subunit gamma 1	Q8IUY3	GRAMD2A	GRAM domain containing 2A	Q9P1Q0	VPS54	VPS54 subunit of GARP complex	O75832	PSMD10	proteasome 26S subunit, non-ATPase 10	O75832	PSMD10	proteasome 26S subunit, non-ATPase 10	P62917	RPL8	ribosomal protein L8	O43405	COCH	cochlin
Q99518	FMO2	flavin containing dimethylaniline monoxygenase 2	Q06187	BTK	Bruton tyrosine kinase	Q8WWF8	CAPSL	calcyphosine like	Q8WWF6	DNAJB3	DnaJ heat shock protein family (Hsp40) member B3	Q8WWF6	DNAJB3	DnaJ heat shock protein family (Hsp40) member B3	Q8NHY5	HUS1B	HUS1 checkpoint clamp component B	Q9BTP6	ZBED2	zinc finger BED-type containing 2
O43603	GALR2	galanin receptor 2	Q969J5	IL22RA2	interleukin 22 receptor subunit alpha 2	P19087	GNAT2	G protein subunit alpha transducin 2	Q9H903	MTHFD2L	methylenetetrahydrofolate dehydrogenase (NADP+ dependent) 2 like	Q9H903	MTHFD2L	methylenetetrahydrofolate dehydrogenase (NADP+ dependent) 2 like	P49257	LMAN1	lectin, mannose binding 1	Q13636	RAB31	RAB31, member RAS oncogene family
Q8WXD0	RXFP2	relaxin family peptide receptor 2	Q96DE9	EOLA2	endothelium and lymphocyte associated ASCH domain 2	Q8N9V7	TOPAZ1	testis and ovary specific TOPAZ 1	P30520	ADSS2	adenylosuccinate synthase 2	P30520	ADSS2	adenylosuccinate synthase 2	P08865	RPSA	ribosomal protein SA	O43559	FRS3	fibroblast growth factor receptor substrate 3
P08172	CHRM2	cholinergic receptor muscarinic 2	Q8TC59	PIWIL2	piwi like RNA-mediated gene silencing 2	Q9H9B1	EHMT1	euchromatic histone lysine methyltransferase 1	P67809	YBX1	Y-box binding protein 1	P67809	YBX1	Y-box binding protein 1	P55039	DRG2	developmentally regulated GTP binding protein 2	Q9Y2T4	PPP2R2C	protein phosphatase 2 regulatory subunit Bgamma
Q8WYQ9	ZCCHC14	zinc finger CCHC-type containing 14	Q8WY64	MYLIP	myosin regulatory light chain interacting protein	Q6PP77	XKRX	XK related X-linked	P38646	HSPA9	heat shock protein family A (Hsp70) member 9	P38646	HSPA9	heat shock protein family A (Hsp70) member 9	Q6IS14	EIF5AL1	eukaryotic translation initiation factor 5A like 1	Q8WTP8	AEN	apoptosis enhancing nuclease
Q96NR3	PTCHD1	patched domain containing 1	Q9UNG2	TNFSF18	TNF superfamily member 18	Q5T700	LDLRAD1	low density lipoprotein receptor class A domain containing 1	P09467	FBP1	fructose-bisphosphatase 1	P09467	FBP1	fructose-bisphosphatase 1	Q6DRA6	H2BC19P	H2B clustered histone 19, pseudogene	Q9UPY5	SLC7A11	solute carrier family 7 member 11
Q14554	PDIA5	protein disulfide isomerase family A member 5	Q9H993	ARMT1	acidic residue methyltransferase 1	Q86VV8	RTTN	rotatin	P42126	ECI1	enoyl-CoA delta isomerase 1	P42126	ECI1	enoyl-CoA delta isomerase 1	Q8TAA3	PSMA8	proteasome 20S subunit alpha 8	Q9BQE3	TUBA1C	tubulin alpha 1c
Q8IV08	PLD3	phospholipase D family member 3	P54105	CLNS1A	chloride nucleotide-sensitive channel 1A	P28067	HLA-DMA	major histocompatibility complex, class II, DM alpha	P23921	RRM1	ribonucleotide reductase catalytic subunit M1	P23921	RRM1	ribonucleotide reductase catalytic subunit M1	Q9Y324	FCF1	FCF1 rRNA-processing protein	Q5T681	C10orf62	chromosome 10 open reading frame 62
O95741	CPNE6	copine 6	Q9Y5E3	PCDHB6	protocadherin beta 6	Q8NCK3	ZNF485	zinc finger protein 485	P11169	SLC2A3	solute carrier family 2 member 3	P11169	SLC2A3	solute carrier family 2 member 3	P56524	HDAC4	histone deacetylase 4	Q02487	DSC2	desmocollin 2
P07307	ASGR2	asialoglycoprotein receptor 2	Q13562	NEUROD1	neuronal differentiation 1	Q5W0Q7	USPL1	ubiquitin specific peptidase like 1	P20749	BCL3	BCL3 transcription coactivator	P20749	BCL3	BCL3 transcription coactivator	P62266	RPS23	ribosomal protein S23	Q567V2	MPV17L2	MPV17 mitochondrial inner membrane protein like 2
Q9H244	P2RY12	purinergic receptor P2Y12	Q96P47	AGAP3	ArfGAP with GTPase domain, ankyrin repeat and PH domain 3	P0CJ79	ZNF888	zinc finger protein 888	Q8NHS0	DNAJB8	DnaJ heat shock protein family (Hsp40) member B8	Q8NHS0	DNAJB8	DnaJ heat shock protein family (Hsp40) member B8	P40227	CCT6A	chaperonin containing TCP1 subunit 6A	P22307	SCP2	sterol carrier protein 2
P41587	VIPR2	vasoactive intestinal peptide receptor 2	O75575	CRCP	CGRP receptor component	Q9NRD9	DUOX1	dual oxidase 1	Q3SY69	ALDH1L2	aldehyde dehydrogenase 1 family member L2	Q3SY69	ALDH1L2	aldehyde dehydrogenase 1 family member L2	P50991	CCT4	chaperonin containing TCP1 subunit 4	A0A075B6T7	TRAV6	T cell receptor alpha variable 6
O14523	C2CD2L	C2CD2 like	P15172	MYOD1	myogenic differentiation 1	Q9H772	GREM2	gremlin 2, DAN family BMP antagonist	Q14CX5	MFSD13A	major facilitator superfamily domain containing 13A	Q14CX5	MFSD13A	major facilitator superfamily domain containing 13A	Q9NP97	DYNLRB1	dynein light chain roadblock-type 1	O43759	SYNGR1	synaptogyrin 1
P26006	ITGA3	integrin subunit alpha 3	Q93050	ATP6V0A1	ATPase H+ transporting V0 subunit a1	D6RBQ6	USP17L17	ubiquitin specific peptidase 17 like family member 17	P0CW18	PRSS56	serine protease 56	P0CW18	PRSS56	serine protease 56	O60921	HUS1	HUS1 checkpoint clamp component	A6NEL2	SOWAHB	sosondowah ankyrin repeat domain family member B
P19429	TNNI3	troponin I3, cardiac type	P0C1H6	H2BW2	H2B.W histone 2	Q9Y5Q8	GTF3C5	general transcription factor IIIC subunit 5	Q53H96	PYCR3	pyrroline-5-carboxylate reductase 3	Q53H96	PYCR3	pyrroline-5-carboxylate reductase 3	Q9GZM3	POLR2J2	RNA polymerase II subunit J2	P61587	RND3	Rho family GTPase 3
Q96MC2	DRC1	dynein regulatory complex subunit 1	Q99929	ASCL2	achaete-scute family bHLH transcription factor 2	Q8TF45	ZNF418	zinc finger protein 418	Q9UQ10	DHDH	dihydrodiol dehydrogenase	Q9UQ10	DHDH	dihydrodiol dehydrogenase	P46597	ASMT	acetylserotonin O-methyltransferase	C9JA33	PALM2AKAP2	PALM2 and AKAP2 fusion
P04001	OPN1MW	opsin 1, medium wave sensitive	Q15465	SHH	sonic hedgehog signaling molecule	Q9HC16	APOBEC3G	apolipoprotein B mRNA editing enzyme catalytic subunit 3G	P49591	SARS1	seryl-tRNA synthetase 1	P49591	SARS1	seryl-tRNA synthetase 1	Q9Y2Y1	POLR3K	RNA polymerase III subunit K	Q9Y691	KCNMB2	potassium calcium-activated channel subfamily M regulatory beta subunit 2
P02753	RBP4	retinol binding protein 4	O95158	NXPH4	neurexophilin 4	Q9UKX3	MYH13	myosin heavy chain 13	O00764	PDXK	pyridoxal kinase	O00764	PDXK	pyridoxal kinase	P49368	CCT3	chaperonin containing TCP1 subunit 3	B4E2M5	ANKRD66	ankyrin repeat domain 66
P49356	FNTB	farnesyltransferase, CAAX box, beta	Q6SJ96	TBPL2	TATA-box binding protein like 2	O00767	SCD	stearoyl-CoA desaturase	P05496	ATP5MC1	ATP synthase membrane subunit c locus 1	P05496	ATP5MC1	ATP synthase membrane subunit c locus 1	P22087	FBL	fibrillarin	Q8IYK8	REM2	RRAD and GEM like GTPase 2
Q99731	CCL19	C-C motif chemokine ligand 19	Q5W111	SPRYD7	SPRY domain containing 7	Q8TB69	ZNF519	zinc finger protein 519	Q15633	TARBP2	TARBP2 subunit of RISC loading complex	Q15633	TARBP2	TARBP2 subunit of RISC loading complex	P61221	ABCE1	ATP binding cassette subfamily E member 1	Q9BSY4	CHCHD5	coiled-coil-helix-coiled-coil-helix domain containing 5
Q13670	PMS2P11	PMS1 homolog 2, mismatch repair system component pseudogene 11	Q8N4C7	STX19	syntaxin 19	Q9H8J5	MANSC1	MANSC domain containing 1	Q13907	IDI1	isopentenyl-diphosphate delta isomerase 1	Q13907	IDI1	isopentenyl-diphosphate delta isomerase 1	O94763	URI1	URI1 prefoldin like chaperone	O95502	NPTXR	neuronal pentraxin receptor
O00398	P2RY10	P2Y receptor family member 10	Q9Y5K1	SPO11	SPO11 initiator of meiotic double strand breaks	Q9Y3C8	UFC1	ubiquitin-fold modifier conjugating enzyme 1	O60218	AKR1B10	aldo-keto reductase family 1 member B10	O60218	AKR1B10	aldo-keto reductase family 1 member B10	Q9UKV0	HDAC9	histone deacetylase 9	Q7Z3Y9	KRT26	keratin 26
Q8N9L9	ACOT4	acyl-CoA thioesterase 4	P36543	ATP6V1E1	ATPase H+ transporting V1 subunit E1	Q16537	PPP2R5E	protein phosphatase 2 regulatory subunit B'epsilon	Q8N4T8	CBR4	carbonyl reductase 4	Q8N4T8	CBR4	carbonyl reductase 4	O15379	HDAC3	histone deacetylase 3	Q5T890	ERCC6L2	ERCC excision repair 6 like 2
P21810	BGN	biglycan	O60462	NRP2	neuropilin 2	Q99952	PTPN18	protein tyrosine phosphatase non-receptor type 18	Q9NS18	GLRX2	glutaredoxin 2	Q9NS18	GLRX2	glutaredoxin 2	P05386	RPLP1	ribosomal protein lateral stalk subunit P1	Q96Q40	CDK15	cyclin dependent kinase 15
A0A1W2PQ27	SSU72P7	RNA polymerase II subunit A C-terminal domain phosphatase SSU72 (CTD phosphatase SSU72) (EC 3.1.3.16)	P29803	PDHA2	pyruvate dehydrogenase E1 subunit alpha 2	Q13360	ZNF177	zinc finger protein 177	Q5JUR7	TEX30	testis expressed 30	Q5JUR7	TEX30	testis expressed 30	Q6WBX8	RAD9B	RAD9 checkpoint clamp component B	Q9H8M5	CNNM2	cyclin and CBS domain divalent metal cation transport mediator 2
A5D6W6	FITM1	fat storage inducing transmembrane protein 1	Q96LA8	PRMT6	protein arginine methyltransferase 6	P10275	AR	androgen receptor	P36969	GPX4	glutathione peroxidase 4	P36969	GPX4	glutathione peroxidase 4	Q9H9T3	ELP3	elongator acetyltransferase complex subunit 3	O95670	ATP6V1G2	ATPase H+ transporting V1 subunit G2
Q8NGJ8	OR51S1	olfactory receptor family 51 subfamily S member 1	Q15848	ADIPOQ	adiponectin, C1Q and collagen domain containing	Q13574	DGKZ	diacylglycerol kinase zeta	A6NJ78	METTL15	methyltransferase 15, mitochondrial 12S rRNA N4-cytidine	A6NJ78	METTL15	methyltransferase 15, mitochondrial 12S rRNA N4-cytidine	P62841	RPS15	ribosomal protein S15	P51793	CLCN4	chloride voltage-gated channel 4
Q8NGK5	OR52M1	olfactory receptor family 52 subfamily M member 1	Q9UL62	TRPC5	transient receptor potential cation channel subfamily C member 5	Q14184	DOC2B	double C2 domain beta	P10515	DLAT	dihydrolipoamide S-acetyltransferase	P10515	DLAT	dihydrolipoamide S-acetyltransferase	P25398	RPS12	ribosomal protein S12	Q9NZ42	PSENEN	presenilin enhancer, gamma-secretase subunit
A2RTY3	HEATR9	HEAT repeat containing 9	Q7Z713	ANKRD37	ankyrin repeat domain 37	Q10567	AP1B1	adaptor related protein complex 1 subunit beta 1	Q49A26	GLYR1	glyoxylate reductase 1 homolog	Q49A26	GLYR1	glyoxylate reductase 1 homolog	P49736	MCM2	minichromosome maintenance complex component 2	P58166	INHBE	inhibin subunit beta E
O75106	AOC2	amine oxidase copper containing 2	P42766	RPL35	ribosomal protein L35	Q8WXQ8	CPA5	carboxypeptidase A5	Q969S9	GFM2	GTP dependent ribosome recycling factor mitochondrial 2	Q969S9	GFM2	GTP dependent ribosome recycling factor mitochondrial 2	Q14566	MCM6	minichromosome maintenance complex component 6	Q9H3H5	DPAGT1	dolichyl-phosphate N-acetylglucosaminephosphotransferase 1
P08514	ITGA2B	integrin subunit alpha 2b	Q9BU61	NDUFAF3	NADH:ubiquinone oxidoreductase complex assembly factor 3	Q13075	NAIP	NLR family apoptosis inhibitory protein	O60231	DHX16	DEAH-box helicase 16	O60231	DHX16	DEAH-box helicase 16	Q9UQL6	HDAC5	histone deacetylase 5	P35241	RDX	radixin
Q14914	PTGR1	prostaglandin reductase 1	Q92667	AKAP1	A-kinase anchoring protein 1	Q9NQW5	PRDM7	PR/SET domain 7	Q96FI4	NEIL1	nei like DNA glycosylase 1	Q96FI4	NEIL1	nei like DNA glycosylase 1	P25205	MCM3	minichromosome maintenance complex component 3	Q96HB5	CCDC120	coiled-coil domain containing 120
Q9UBS4	DNAJB11	DnaJ heat shock protein family (Hsp40) member B11	Q8TE69	EOLA1	endothelium and lymphocyte associated ASCH domain 1	Q14790	CASP8	caspase 8	Q7Z4W1	DCXR	dicarbonyl and L-xylulose reductase	Q7Z4W1	DCXR	dicarbonyl and L-xylulose reductase	O60671	RAD1	RAD1 checkpoint DNA exonuclease	Q15126	PMVK	phosphomevalonate kinase
Q71SY5	MED25	mediator complex subunit 25	P52435	POLR2J	RNA polymerase II subunit J	P42568	MLLT3	MLLT3 super elongation complex subunit	Q9NP81	SARS2	seryl-tRNA synthetase 2, mitochondrial	Q9NP81	SARS2	seryl-tRNA synthetase 2, mitochondrial	P25787	PSMA2	proteasome 20S subunit alpha 2	O75751	SLC22A3	solute carrier family 22 member 3
A0A087WT01	TRAV27	T cell receptor alpha variable 27	Q9BYJ9	YTHDF1	YTH N6-methyladenosine RNA binding protein F1	Q16877	PFKFB4	6-phosphofructo-2-kinase/fructose-2,6-biphosphatase 4	Q9NY64	SLC2A8	solute carrier family 2 member 8	Q9NY64	SLC2A8	solute carrier family 2 member 8	P63241	EIF5A	eukaryotic translation initiation factor 5A	Q4G0X9	CCDC40	coiled-coil domain containing 40
P30519	HMOX2	heme oxygenase 2	Q86WR0	CCDC25	coiled-coil domain containing 25	Q8NBK3	SUMF1	sulfatase modifying factor 1	Q9NQR4	NIT2	nitrilase family member 2	Q9NQR4	NIT2	nitrilase family member 2	Q9H1A7	POLR2J3	RNA polymerase II subunit J3	O15126	SCAMP1	secretory carrier membrane protein 1
Q9H9H4	VPS37B	VPS37B subunit of ESCRT-I	Q9C035	TRIM5	tripartite motif containing 5	A8MYJ7	TTC34	tetratricopeptide repeat domain 34	P18669	PGAM1	phosphoglycerate mutase 1	P18669	PGAM1	phosphoglycerate mutase 1	P05387	RPLP2	ribosomal protein lateral stalk subunit P2	O43663	PRC1	protein regulator of cytokinesis 1
P01772	IGHV3-33	immunoglobulin heavy variable 3-33	Q9NRX1	PNO1	partner of NOB1 homolog	O43915	VEGFD	vascular endothelial growth factor D	Q16775	HAGH	hydroxyacylglutathione hydrolase	Q16775	HAGH	hydroxyacylglutathione hydrolase	Q96FX7	TRMT61A	tRNA methyltransferase 61A	Q9UQ07	MOK	MOK protein kinase
O94817	ATG12	autophagy related 12	Q6ZVD8	PHLPP2	PH domain and leucine rich repeat protein phosphatase 2	Q9NVI1	FANCI	FA complementation group I	P07203	GPX1	glutathione peroxidase 1	P07203	GPX1	glutathione peroxidase 1	Q8IVP5	FUNDC1	FUN14 domain containing 1	O15270	SPTLC2	serine palmitoyltransferase long chain base subunit 2
Q9NYP9	MIS18A	MIS18 kinetochore protein A	Q96LA6	FCRL1	Fc receptor like 1	Q16515	ASIC2	acid sensing ion channel subunit 2	Q9BZQ4	NMNAT2	nicotinamide nucleotide adenylyltransferase 2	Q9BZQ4	NMNAT2	nicotinamide nucleotide adenylyltransferase 2	Q9Y5K8	ATP6V1D	ATPase H+ transporting V1 subunit D	Q96AH0	NABP1	nucleic acid binding protein 1
P35226	BMI1	BMI1 proto-oncogene, polycomb ring finger	P50150	GNG4	G protein subunit gamma 4	Q59H18	TNNI3K	TNNI3 interacting kinase	P32189	GK	glycerol kinase	P32189	GK	glycerol kinase	Q92979	EMG1	EMG1 N1-specific pseudouridine methyltransferase	O60568	PLOD3	procollagen-lysine,2-oxoglutarate 5-dioxygenase 3
Q6NV75	GPR153	G protein-coupled receptor 153	O14910	LIN7A	lin-7 homolog A, crumbs cell polarity complex component	Q9BQ83	SLX1A	SLX1 homolog A, structure-specific endonuclease subunit	Q9P0Z9	PIPOX	pipecolic acid and sarcosine oxidase	Q9P0Z9	PIPOX	pipecolic acid and sarcosine oxidase	P12004	PCNA	proliferating cell nuclear antigen	Q96BD8	SKA1	spindle and kinetochore associated complex subunit 1
Q7Z4W2	LYZL2	lysozyme like 2	P61254	RPL26	ribosomal protein L26	Q2TAP0	GOLGA7B	golgin A7 family member B	P51570	GALK1	galactokinase 1	P51570	GALK1	galactokinase 1	Q9UKF6	CPSF3	cleavage and polyadenylation specific factor 3	O43424	GRID2	glutamate ionotropic receptor delta type subunit 2
P02671	FGA	fibrinogen alpha chain	A8MSI8	LYRM9	LYR motif containing 9	P51504	ZNF80	zinc finger protein 80	P53794	SLC5A3	solute carrier family 5 member 3	P53794	SLC5A3	solute carrier family 5 member 3	Q9HD40	SEPSECS	Sep (O-phosphoserine) tRNA:Sec (selenocysteine) tRNA synthase	Q96NX9	DACH2	dachshund family transcription factor 2
Q9UDY8	MALT1	MALT1 paracaspase	Q5SQN1	SNAP47	synaptosome associated protein 47	Q9ULE6	PALD1	phosphatase domain containing paladin 1	A8MPS7	YDJC	YdjC chitooligosaccharide deacetylase homolog	A8MPS7	YDJC	YdjC chitooligosaccharide deacetylase homolog	Q9BSD7	NTPCR	nucleoside-triphosphatase, cancer-related	P13196	ALAS1	5'-aminolevulinate synthase 1
Q9Y3D3	MRPS16	mitochondrial ribosomal protein S16	O75319	DUSP11	dual specificity phosphatase 11	P11387	TOP1	DNA topoisomerase I	P54132	BLM	BLM RecQ like helicase	P54132	BLM	BLM RecQ like helicase	P38606	ATP6V1A	ATPase H+ transporting V1 subunit A	A6NEE1	PLEKHD1	pleckstrin homology and coiled-coil domain containing D1
Q9P244	LRFN1	leucine rich repeat and fibronectin type III domain containing 1	P04035	HMGCR	3-hydroxy-3-methylglutaryl-CoA reductase	Q16553	LY6E	lymphocyte antigen 6 family member E	Q9NTM9	CUTC	cutC copper transporter	Q9NTM9	CUTC	cutC copper transporter	Q13547	HDAC1	histone deacetylase 1	P78316	NOP14	NOP14 nucleolar protein
Q99687	MEIS3	Meis homeobox 3	Q7Z3Z4	PIWIL4	piwi like RNA-mediated gene silencing 4	P10767	FGF6	fibroblast growth factor 6	P09417	QDPR	quinoid dihydropteridine reductase	P09417	QDPR	quinoid dihydropteridine reductase	O14818	PSMA7	proteasome 20S subunit alpha 7	Q15772	SPEG	striated muscle enriched protein kinase
Q8TDC3	BRSK1	BR serine/threonine kinase 1	O15131	KPNA5	karyopherin subunit alpha 5	Q9UDW3	ZMAT5	zinc finger matrin-type 5	Q15327	ANKRD1	ankyrin repeat domain 1	Q15327	ANKRD1	ankyrin repeat domain 1	Q9H4I3	TRABD	TraB domain containing	P01721	IGLV6-57	immunoglobulin lambda variable 6-57
Q9BZJ6	GPR63	G protein-coupled receptor 63	P40200	CD96	CD96 molecule	C9JE40	PATL2	PAT1 homolog 2	Q9H4K7	MTG2	mitochondrial ribosome associated GTPase 2	Q9H4K7	MTG2	mitochondrial ribosome associated GTPase 2	Q9H2P9	DPH5	diphthamide biosynthesis 5	P78380	OLR1	oxidized low density lipoprotein receptor 1
Q9BQG2	NUDT12	nudix hydrolase 12	A0A1W2PRN6	LINC02218	long intergenic non-protein coding RNA 2218	Q96KN4	LRATD1	LRAT domain containing 1	O94808	GFPT2	glutamine-fructose-6-phosphate transaminase 2	O94808	GFPT2	glutamine-fructose-6-phosphate transaminase 2	Q92769	HDAC2	histone deacetylase 2	Q8NE01	CNNM3	cyclin and CBS domain divalent metal cation transport mediator 3
O75439	PMPCB	peptidase, mitochondrial processing subunit beta	Q14623	IHH	Indian hedgehog signaling molecule	P42785	PRCP	prolylcarboxypeptidase	Q96PS8	AQP10	aquaporin 10	Q96PS8	AQP10	aquaporin 10	Q99832	CCT7	chaperonin containing TCP1 subunit 7	Q9Y692	GMEB1	glucocorticoid modulatory element binding protein 1
A0A5A2	TRBV5-8	T cell receptor beta variable 5-8	P33991	MCM4	minichromosome maintenance complex component 4	Q6ZN18	AEBP2	AE binding protein 2	Q14749	GNMT	glycine N-methyltransferase	Q14749	GNMT	glycine N-methyltransferase	P50990	CCT8	chaperonin containing TCP1 subunit 8	P05362	ICAM1	intercellular adhesion molecule 1
Q14154	DELE1	DAP3 binding cell death enhancer 1	Q9H816	DCLRE1B	DNA cross-link repair 1B	Q969Z4	RELT	RELT TNF receptor	Q96SL4	GPX7	glutathione peroxidase 7	Q96SL4	GPX7	glutathione peroxidase 7	P46782	RPS5	ribosomal protein S5	Q9NVM6	DNAJC17	DnaJ heat shock protein family (Hsp40) member C17
P08034	GJB1	gap junction protein beta 1	Q96JN8	NEURL4	neuralized E3 ubiquitin protein ligase 4	P54826	GAS1	growth arrest specific 1	Q8WV74	NUDT8	nudix hydrolase 8	Q8WV74	NUDT8	nudix hydrolase 8	Q96HN2	AHCYL2	adenosylhomocysteinase like 2	A2RUH7	MYBPHL	myosin binding protein H like
Q14966	ZNF638	zinc finger protein 638	Q13740	ALCAM	activated leukocyte cell adhesion molecule	P16452	EPB42	erythrocyte membrane protein band 4.2	Q9BXR0	QTRT1	queuine tRNA-ribosyltransferase catalytic subunit 1	Q9BXR0	QTRT1	queuine tRNA-ribosyltransferase catalytic subunit 1	P0DPB6	POLR1D	RNA polymerase I and III subunit D	P09497	CLTB	clathrin light chain B
Q06265	EXOSC9	exosome component 9	Q96A44	SPSB4	splA/ryanodine receptor domain and SOCS box containing 4	Q9BXJ2	C1QTNF7	C1q and TNF related 7	Q9UG56	PISD	phosphatidylserine decarboxylase	Q9UG56	PISD	phosphatidylserine decarboxylase	Q7Z7A3	CTU1	cytosolic thiouridylase subunit 1	P22061	PCMT1	protein-L-isoaspartate (D-aspartate) O-methyltransferase
Q8WXI3	ASB10	ankyrin repeat and SOCS box containing 10	P01375	TNF	tumor necrosis factor	P31371	FGF9	fibroblast growth factor 9	Q9HA92	RSAD1	radical S-adenosyl methionine domain containing 1	Q9HA92	RSAD1	radical S-adenosyl methionine domain containing 1	P17987	TCP1	t-complex 1	P17509	HOXB6	homeobox B6
Q96R28	OR2M2	olfactory receptor family 2 subfamily M member 2	Q96C90	PPP1R14B	protein phosphatase 1 regulatory inhibitor subunit 14B	Q9Y5P8	PPP2R3B	protein phosphatase 2 regulatory subunit B''beta	Q92598	HSPH1	heat shock protein family H (Hsp110) member 1	Q92598	HSPH1	heat shock protein family H (Hsp110) member 1	Q9NR45	NANS	N-acetylneuraminate synthase	Q7KYR7	BTN2A1	butyrophilin subfamily 2 member A1
Q9NPH6	OBP2B	odorant binding protein 2B	Q00403	GTF2B	general transcription factor IIB	O00541	PES1	pescadillo ribosomal biogenesis factor 1	P06737	PYGL	glycogen phosphorylase L	P06737	PYGL	glycogen phosphorylase L	Q8WUI4	HDAC7	histone deacetylase 7	Q9Y6N1	COX11	cytochrome c oxidase copper chaperone COX11
Q9NQT4	EXOSC5	exosome component 5	O43567	RNF13	ring finger protein 13	Q6ZUK4	TMEM26	transmembrane protein 26	Q02338	BDH1	3-hydroxybutyrate dehydrogenase 1	Q02338	BDH1	3-hydroxybutyrate dehydrogenase 1	Q99638	RAD9A	RAD9 checkpoint clamp component A	A4D2B0	MBLAC1	metallo-beta-lactamase domain containing 1
Q86U70	LDB1	LIM domain binding 1	Q8TF05	PPP4R1	protein phosphatase 4 regulatory subunit 1	Q6ZRP0	PRR23C	proline rich 23C	Q13363	CTBP1	C-terminal binding protein 1	Q13363	CTBP1	C-terminal binding protein 1	P60900	PSMA6	proteasome 20S subunit alpha 6	Q9BTL4	IER2	immediate early response 2
P20933	AGA	aspartylglucosaminidase	P20849	COL9A1	collagen type IX alpha 1 chain	P17036	ZNF3	zinc finger protein 3	Q8N4E4	PDCL2	phosducin like 2	Q8N4E4	PDCL2	phosducin like 2	P48643	CCT5	chaperonin containing TCP1 subunit 5	P17542	TAL1	TAL bHLH transcription factor 1, erythroid differentiation factor
Q8NGT0	OR13C9	olfactory receptor family 13 subfamily C member 9	Q9Y5F2	PCDHB11	protocadherin beta 11	Q96G97	BSCL2	BSCL2 lipid droplet biogenesis associated, seipin	Q9NRG1	PRTFDC1	phosphoribosyl transferase domain containing 1	Q9NRG1	PRTFDC1	phosphoribosyl transferase domain containing 1	Q9Y295	DRG1	developmentally regulated GTP binding protein 1	Q96S15	WDR24	WD repeat domain 24
Q8NG77	OR2T12	olfactory receptor family 2 subfamily T member 12	P27797	CALR	calreticulin	A0A2R8Y4L2	HNRNPA1L3	heterogeneous nuclear ribonucleoprotein A1 like 3	Q9Y232	CDYL	chromodomain Y like	Q9Y232	CDYL	chromodomain Y like	O43865	AHCYL1	adenosylhomocysteinase like 1	P61006	RAB8A	RAB8A, member RAS oncogene family
P25929	NPY1R	neuropeptide Y receptor Y1	Q15573	TAF1A	TATA-box binding protein associated factor, RNA polymerase I subunit A	Q16627	CCL14	C-C motif chemokine ligand 14	P26639	TARS1	threonyl-tRNA synthetase 1	P26639	TARS1	threonyl-tRNA synthetase 1	P15880	RPS2	ribosomal protein S2	Q8N427	NME8	NME/NM23 family member 8
Q8N5N7	MRPL50	mitochondrial ribosomal protein L50	Q15672	TWIST1	twist family bHLH transcription factor 1	Q9NXT0	ZNF586	zinc finger protein 586	Q8NBS9	TXNDC5	thioredoxin domain containing 5	Q8NBS9	TXNDC5	thioredoxin domain containing 5	P25786	PSMA1	proteasome 20S subunit alpha 1	Q96E39	RBMXL1	RBMX like 1
Q8N8N7	PTGR2	prostaglandin reductase 2	P61266	STX1B	syntaxin 1B	O43597	SPRY2	sprouty RTK signaling antagonist 2	P25963	NFKBIA	NFKB inhibitor alpha	P25963	NFKBIA	NFKB inhibitor alpha	P33992	MCM5	minichromosome maintenance complex component 5	Q9NX74	DUS2	dihydrouridine synthase 2
Q9UPR6	ZFR2	zinc finger RNA binding protein 2	Q96HH9	GRAMD2B	GRAM domain containing 2B	A0PJX4	SHISA3	shisa family member 3	Q9UBQ7	GRHPR	glyoxylate and hydroxypyruvate reductase	Q9UBQ7	GRHPR	glyoxylate and hydroxypyruvate reductase	P78371	CCT2	chaperonin containing TCP1 subunit 2	P26196	DDX6	DEAD-box helicase 6
O43820	HYAL3	hyaluronidase 3	Q9NRJ7	PCDHB16	protocadherin beta 16	Q8TDB6	DTX3L	deltex E3 ubiquitin ligase 3L	Q2M3M2	SLC5A9	solute carrier family 5 member 9	Q2M3M2	SLC5A9	solute carrier family 5 member 9	Q9NX24	NHP2	NHP2 ribonucleoprotein	Q6ZQY3	GADL1	glutamate decarboxylase like 1
O75976	CPD	carboxypeptidase D	O60524	NEMF	nuclear export mediator factor	Q15406	NR6A1	nuclear receptor subfamily 6 group A member 1	Q96DC8	ECHDC3	enoyl-CoA hydratase domain containing 3	Q96DC8	ECHDC3	enoyl-CoA hydratase domain containing 3	P62888	RPL30	ribosomal protein L30	Q92968	PEX13	peroxisomal biogenesis factor 13
A0A5B7	TRBV29-1	T cell receptor beta variable 29-1	P50570	DNM2	dynamin 2	Q96DC9	OTUB2	OTU deubiquitinase, ubiquitin aldehyde binding 2	Q96S55	WRNIP1	WRN helicase interacting protein 1	Q96S55	WRNIP1	WRN helicase interacting protein 1	P18621	RPL17	ribosomal protein L17	Q9UET6	FTSJ1	FtsJ RNA 2'-O-methyltransferase 1
Q96MZ0	GDAP1L1	ganglioside induced differentiation associated protein 1 like 1	P62875	POLR2L	RNA polymerase II, I and III subunit L	P20908	COL5A1	collagen type V alpha 1 chain	P28340	POLD1	DNA polymerase delta 1, catalytic subunit	P28340	POLD1	DNA polymerase delta 1, catalytic subunit	P28066	PSMA5	proteasome 20S subunit alpha 5	P41159	LEP	leptin
Q92847	GHSR	growth hormone secretagogue receptor	Q8TAM2	TTC8	tetratricopeptide repeat domain 8	Q96DX8	RTP4	receptor transporter protein 4	Q6DHV7	ADAL	adenosine deaminase like	Q6DHV7	ADAL	adenosine deaminase like	Q14565	DMC1	DNA meiotic recombinase 1	Q8IZ57	NRSN1	neurensin 1
P17900	GM2A	ganglioside GM2 activator	Q9NYZ1	TVP23B	trans-golgi network vesicle protein 23 homolog B	Q8NF99	ZNF397	zinc finger protein 397	P35270	SPR	sepiapterin reductase	P35270	SPR	sepiapterin reductase	O14802	POLR3A	RNA polymerase III subunit A	Q9NPF4	OSGEP	O-sialoglycoprotein endopeptidase
Q86VX2	COMMD7	COMM domain containing 7	Q7Z6J9	TSEN54	tRNA splicing endonuclease subunit 54	P0CI25	TRIM49	tripartite motif containing 49	Q13825	AUH	AU RNA binding methylglutaconyl-CoA hydratase	Q13825	AUH	AU RNA binding methylglutaconyl-CoA hydratase	O75306	NDUFS2	NADH:ubiquinone oxidoreductase core subunit S2	Q14126	DSG2	desmoglein 2
Q6IEV9	OR4C11	olfactory receptor family 4 subfamily C member 11	Q9H9G7	AGO3	argonaute RISC catalytic component 3	Q8NG27	PJA1	praja ring finger ubiquitin ligase 1	P0C7X4	FTH1P19	ferritin heavy chain 1 pseudogene 19	P0C7X4	FTH1P19	ferritin heavy chain 1 pseudogene 19	Q9Y2Q5	LAMTOR2	late endosomal/lysosomal adaptor, MAPK and MTOR activator 2	Q92615	LARP4B	La ribonucleoprotein 4B
Q8NGN0	OR4D5	olfactory receptor family 4 subfamily D member 5	P0C0S8	H2AC11	H2A clustered histone 11	Q8N8L2	ZNF491	zinc finger protein 491	P00492	HPRT1	hypoxanthine phosphoribosyltransferase 1	P00492	HPRT1	hypoxanthine phosphoribosyltransferase 1	Q06609	RAD51	RAD51 recombinase	Q9UNE2	RPH3AL	rabphilin 3A like (without C2 domains)
Q96R09	OR5B2	olfactory receptor family 5 subfamily B member 2	Q9Y5H9	PCDHA2	protocadherin alpha 2	Q8WY21	SORCS1	sortilin related VPS10 domain containing receptor 1	A0A075B734	AQP7B	aquaporin 7B	A0A075B734	AQP7B	aquaporin 7B	P25789	PSMA4	proteasome 20S subunit alpha 4	A0A075B6V5	TRAV36DV7	T cell receptor alpha variable 36/delta variable 7
Q96LB2	MRGPRX1	MAS related GPR family member X1	O00214	LGALS8	galectin 8	A0A024R8L7	ACOX1	acyl-CoA oxidase 1	Q05932	FPGS	folylpolyglutamate synthase	Q05932	FPGS	folylpolyglutamate synthase	P62280	RPS11	ribosomal protein S11	P56915	GSC	goosecoid homeobox
P19875	CXCL2	C-X-C motif chemokine ligand 2	A0A3B3IRV3	MCTS2	MCTS family member 2	O00750	PIK3C2B	phosphatidylinositol-4-phosphate 3-kinase catalytic subunit type 2 beta	Q1EHB4	SLC5A12	solute carrier family 5 member 12	Q1EHB4	SLC5A12	solute carrier family 5 member 12	Q9GZV4	EIF5A2	eukaryotic translation initiation factor 5A2	Q93088	BHMT	betaine--homocysteine S-methyltransferase
Q9NY99	SNTG2	syntrophin gamma 2	Q6K0P9	PYHIN1	pyrin and HIN domain family member 1	O43699	SIGLEC6	sialic acid binding Ig like lectin 6	Q9H299	SH3BGRL3	SH3 domain binding glutamate rich protein like 3	Q9H299	SH3BGRL3	SH3 domain binding glutamate rich protein like 3	Q8NB90	SPATA5	Ribosome biogenesis protein SPATA5 (EC 3.6.4.10) (Spermatogenesis-associated factor protein) (Spermatogenesis-associated protein 5)	Q9H1K6	TLNRD1	talin rod domain containing 1
Q9UHE8	STEAP1	STEAP family member 1	Q71UM5	RPS27L	ribosomal protein S27 like	P22079	LPO	lactoperoxidase	O43868	SLC28A2	solute carrier family 28 member 2	O43868	SLC28A2	solute carrier family 28 member 2	P25788	PSMA3	proteasome 20S subunit alpha 3	Q9UPY3	DICER1	dicer 1, ribonuclease III
Q8NGF0	OR52B6	olfactory receptor family 52 subfamily B member 6	Q9P2E3	ZNFX1	zinc finger NFX1-type containing 1	A8MXV4	NUDT19	nudix hydrolase 19	Q99757	TXN2	thioredoxin 2	Q99757	TXN2	thioredoxin 2	Q9BVS4	RIOK2	RIO kinase 2	Q03014	HHEX	hematopoietically expressed homeobox
Q9NR34	MAN1C1	mannosidase alpha class 1C member 1	Q9Y5I3	PCDHA1	protocadherin alpha 1	Q96EY9	ADAT3	adenosine deaminase tRNA specific 3	P55064	AQP5	aquaporin 5	P55064	AQP5	aquaporin 5	Q9BVS5	TRMT61B	tRNA methyltransferase 61B	Q5SZQ8	CELF3	CUGBP Elav-like family member 3
P09488	GSTM1	glutathione S-transferase mu 1	O14967	CLGN	calmegin	Q9P0N9	TBC1D7	TBC1 domain family member 7	P00441	SOD1	superoxide dismutase 1	P00441	SOD1	superoxide dismutase 1	A6NHQ2	FBLL1	fibrillarin like 1	O15355	PPM1G	protein phosphatase, Mg2+/Mn2+ dependent 1G
P17152	TMEM11	transmembrane protein 11	P61421	ATP6V0D1	ATPase H+ transporting V0 subunit d1	Q8TD22	SFXN5	sideroflexin 5	P13866	SLC5A1	solute carrier family 5 member 1	P13866	SLC5A1	solute carrier family 5 member 1	P23526	AHCY	adenosylhomocysteinase	A0A0G2JMP0	OR4M2B	olfactory receptor family 4 subfamily M member 2B
B2RN74	OR11H12	olfactory receptor family 11 subfamily H member 12	Q68J44	DUSP29	dual specificity phosphatase 29	O95498	VNN2	vanin 2	A6NFX1	MFSD2B	MFSD2 lysolipid transporter B, sphingolipid	A6NFX1	MFSD2B	MFSD2 lysolipid transporter B, sphingolipid				Q53H54	TRMT12	tRNA methyltransferase 12 homolog
O75762	TRPA1	transient receptor potential cation channel subfamily A member 1	P26022	PTX3	pentraxin 3	Q7RTS9	DYM	dymeclin	Q9BYD1	MRPL13	mitochondrial ribosomal protein L13	Q9BYD1	MRPL13	mitochondrial ribosomal protein L13				O43809	NUDT21	nudix hydrolase 21
Q86W33	TPRA1	transmembrane protein adipocyte associated 1	Q9P016	THYN1	thymocyte nuclear protein 1	Q8N961	ABTB2	ankyrin repeat and BTB domain containing 2	Q3B7J2	GFOD2	Gfo/Idh/MocA-like oxidoreductase domain containing 2	Q3B7J2	GFOD2	Gfo/Idh/MocA-like oxidoreductase domain containing 2				Q14728	MFSD10	major facilitator superfamily domain containing 10
Q6UWP7	LCLAT1	lysocardiolipin acyltransferase 1	A0A1W2PQ09	TAF11L11	TATA-box binding protein associated factor 11 like 11	Q9BX93	PLA2G12B	phospholipase A2 group XIIB	Q4L235	AASDH	aminoadipate-semialdehyde dehydrogenase	Q4L235	AASDH	aminoadipate-semialdehyde dehydrogenase				Q9UL41	PNMA3	PNMA family member 3
Q9UF83		Uncharacterized protein DKFZp434B061	Q8WU20	FRS2	fibroblast growth factor receptor substrate 2	P0DP72	VSIG10L2	V-set and immunoglobulin domain containing 10 like 2	Q9UGQ3	SLC2A6	solute carrier family 2 member 6	Q9UGQ3	SLC2A6	solute carrier family 2 member 6				P78363	ABCA4	ATP binding cassette subfamily A member 4
Q8NGR2	OR1L6	olfactory receptor family 1 subfamily L member 6	Q495C1	RNF212	ring finger protein 212	Q02083	NAAA	N-acylethanolamine acid amidase	A0A0B4J2D5	GATD3B	Putative glutamine amidotransferase-like class 1 domain-containing protein 3B, mitochondrial (Keio novel protein-I) (KNP-I) (Protein GT335) (Protein HES1)	A0A0B4J2D5	GATD3B	Putative glutamine amidotransferase-like class 1 domain-containing protein 3B, mitochondrial (Keio novel protein-I) (KNP-I) (Protein GT335) (Protein HES1)				Q96PY6	NEK1	NIMA related kinase 1
Q9P2G3	KLHL14	kelch like family member 14	Q12907	LMAN2	lectin, mannose binding 2	O95876	WDPCP	WD repeat containing planar cell polarity effector	O75521	ECI2	enoyl-CoA delta isomerase 2	O75521	ECI2	enoyl-CoA delta isomerase 2				P62263	RPS14	ribosomal protein S14
O00154	ACOT7	acyl-CoA thioesterase 7	O95602	POLR1A	RNA polymerase I subunit A	O95125	ZNF202	zinc finger protein 202	Q96T66	NMNAT3	nicotinamide nucleotide adenylyltransferase 3	Q96T66	NMNAT3	nicotinamide nucleotide adenylyltransferase 3				Q86U42	PABPN1	poly(A) binding protein nuclear 1
Q99500	S1PR3	sphingosine-1-phosphate receptor 3	P59768	GNG2	G protein subunit gamma 2	P14598	NCF1	neutrophil cytosolic factor 1	P28845	HSD11B1	hydroxysteroid 11-beta dehydrogenase 1	P28845	HSD11B1	hydroxysteroid 11-beta dehydrogenase 1				A2RUB6	CCDC66	coiled-coil domain containing 66
Q86X40	LRRC28	leucine rich repeat containing 28	Q8IVW4	CDKL3	cyclin dependent kinase like 3	Q12972	PPP1R8	protein phosphatase 1 regulatory subunit 8	Q9GZT4	SRR	serine racemase	Q9GZT4	SRR	serine racemase				Q86YS3	RAB11FIP4	RAB11 family interacting protein 4
Q86SP6	GPR149	G protein-coupled receptor 149	O00585	CCL21	C-C motif chemokine ligand 21	Q5VT40	FAM78B	family with sequence similarity 78 member B	Q9NQH7	XPNPEP3	X-prolyl aminopeptidase 3	Q9NQH7	XPNPEP3	X-prolyl aminopeptidase 3				Q5HYW2	NHSL2	NHS like 2
A0AVT1	UBA6	ubiquitin like modifier activating enzyme 6	Q8TE77	SSH3	slingshot protein phosphatase 3	Q86UA1	PRPF39	pre-mRNA processing factor 39	O14520	AQP7	aquaporin 7	O14520	AQP7	aquaporin 7				Q9P289	STK26	serine/threonine kinase 26
Q8NG94	OR11H1	olfactory receptor family 11 subfamily H member 1	P06899	H2BC11	H2B clustered histone 11	Q86TH1	ADAMTSL2	ADAMTS like 2	Q9NY91	SLC5A4	solute carrier family 5 member 4	Q9NY91	SLC5A4	solute carrier family 5 member 4				Q9NYJ1	COA4	cytochrome c oxidase assembly factor 4 homolog
O14832	PHYH	phytanoyl-CoA 2-hydroxylase	P83881	RPL36A	ribosomal protein L36a	Q96N96	SPATA13	spermatogenesis associated 13	Q8NE62	CHDH	choline dehydrogenase	Q8NE62	CHDH	choline dehydrogenase				O43293	DAPK3	death associated protein kinase 3
Q15370	ELOB	elongin B	Q9UK08	GNG8	G protein subunit gamma 8	Q92618	ZNF516	zinc finger protein 516	Q92620	DHX38	DEAH-box helicase 38	Q92620	DHX38	DEAH-box helicase 38				Q96G61	NUDT11	nudix hydrolase 11
Q6UX40	TMEM107	transmembrane protein 107	Q9H6I2	SOX17	SRY-box transcription factor 17	P35237	SERPINB6	serpin family B member 6	O43143	DHX15	DEAH-box helicase 15	O43143	DHX15	DEAH-box helicase 15				A0A024RBG1	NUDT4B	nudix hydrolase 4B
Q8WW22	DNAJA4	DnaJ heat shock protein family (Hsp40) member A4	Q8NBR0	TP53I13	tumor protein p53 inducible protein 13	Q6ZVN8	HJV	hemojuvelin BMP co-receptor	P06132	UROD	uroporphyrinogen decarboxylase	P06132	UROD	uroporphyrinogen decarboxylase				P30305	CDC25B	cell division cycle 25B
Q6ZNQ3	LRRC69	leucine rich repeat containing 69	A0A1W2PPG7	GNG14	G protein subunit gamma 14	Q9H3E2	SNX25	sorting nexin 25	Q9BUP3	HTATIP2	HIV-1 Tat interactive protein 2	Q9BUP3	HTATIP2	HIV-1 Tat interactive protein 2				O95319	CELF2	CUGBP Elav-like family member 2
A0A0B4J241	TRAV13-1	T cell receptor alpha variable 13-1	Q9Y3D0	CIAO2B	cytosolic iron-sulfur assembly component 2B	O60732	MAGEC1	MAGE family member C1	Q9UBS3	DNAJB9	DnaJ heat shock protein family (Hsp40) member B9	Q9UBS3	DNAJB9	DnaJ heat shock protein family (Hsp40) member B9				Q96S21	RAB40C	RAB40C, member RAS oncogene family
P08173	CHRM4	cholinergic receptor muscarinic 4	Q15109	AGER	advanced glycosylation end-product specific receptor	O75808	CAPN15	calpain 15	Q8WWX8	SLC5A11	solute carrier family 5 member 11	Q8WWX8	SLC5A11	solute carrier family 5 member 11				O00206	TLR4	toll like receptor 4
Q8N139	ABCA6	ATP binding cassette subfamily A member 6	Q9P035	HACD3	3-hydroxyacyl-CoA dehydratase 3	Q9UBI9	HECA	hdc homolog, cell cycle regulator	Q96RP9	GFM1	G elongation factor mitochondrial 1	Q96RP9	GFM1	G elongation factor mitochondrial 1				O95747	OXSR1	oxidative stress responsive kinase 1
Q7RTZ1	OVCH2	ovochymase 2	A0A1W2PRV1	TAF11L3	TATA-box binding protein associated factor 11 like 3	P42575	CASP2	caspase 2	Q9HAN9	NMNAT1	nicotinamide nucleotide adenylyltransferase 1	Q9HAN9	NMNAT1	nicotinamide nucleotide adenylyltransferase 1				A4D2H0	CTAGE15	CTAGE family member 15
Q99961	SH3GL1	SH3 domain containing GRB2 like 1, endophilin A2	Q96J94	PIWIL1	piwi like RNA-mediated gene silencing 1	O14649	KCNK3	potassium two pore domain channel subfamily K member 3	P10599	TXN	thioredoxin	P10599	TXN	thioredoxin				P55347	PKNOX1	PBX/knotted 1 homeobox 1
P48723	HSPA13	heat shock protein family A (Hsp70) member 13	Q9Y5F7	PCDHGC4	protocadherin gamma subfamily C, 4	O75290	ZNF780A	zinc finger protein 780A	Q9BPX1	HSD17B14	hydroxysteroid 17-beta dehydrogenase 14	Q9BPX1	HSD17B14	hydroxysteroid 17-beta dehydrogenase 14				Q9H1J1	UPF3A	UPF3A regulator of nonsense mediated mRNA decay
Q16663	CCL15	C-C motif chemokine ligand 15	P62847	RPS24	ribosomal protein S24	O14978	ZNF263	zinc finger protein 263	O94778	AQP8	aquaporin 8	O94778	AQP8	aquaporin 8				Q9Y3F4	STRAP	serine/threonine kinase receptor associated protein
O43586	PSTPIP1	proline-serine-threonine phosphatase interacting protein 1	O95206	PCDH8	protocadherin 8	Q86U17	SERPINA11	serpin family A member 11	P29972	AQP1	aquaporin 1 (Colton blood group)	P29972	AQP1	aquaporin 1 (Colton blood group)				Q92541	RTF1	RTF1 homolog, Paf1/RNA polymerase II complex component
P14174	MIF	macrophage migration inhibitory factor	Q96BT3	CENPT	centromere protein T	P06340	HLA-DOA	major histocompatibility complex, class II, DO alpha	Q9HA47	UCK1	uridine-cytidine kinase 1	Q9HA47	UCK1	uridine-cytidine kinase 1				P57721	PCBP3	poly(rC) binding protein 3
Q9BYX4	IFIH1	interferon induced with helicase C domain 1	P53680	AP2S1	adaptor related protein complex 2 subunit sigma 1	P52655	GTF2A1	general transcription factor IIA subunit 1	P14672	SLC2A4	solute carrier family 2 member 4	P14672	SLC2A4	solute carrier family 2 member 4				Q6NUM6	TYW1B	tRNA-yW synthesizing protein 1 homolog B
A0A0B4J271	TRAV12-3	T cell receptor alpha variable 12-3	Q9HC56	PCDH9	protocadherin 9	Q9UKD1	GMEB2	glucocorticoid modulatory element binding protein 2	Q0VDF9	HSPA14	heat shock protein family A (Hsp70) member 14	Q0VDF9	HSPA14	heat shock protein family A (Hsp70) member 14				P50583	NUDT2	nudix hydrolase 2
O15264	MAPK13	mitogen-activated protein kinase 13	Q9NRE1	MMP26	matrix metallopeptidase 26	Q14112	NID2	nidogen 2	Q9NX01	TXNL4B	thioredoxin like 4B	Q9NX01	TXNL4B	thioredoxin like 4B				A0A1B0GTK4	FAM237A	family with sequence similarity 237 member A
P58180	OR4D2	olfactory receptor family 4 subfamily D member 2	Q9Y5F1	PCDHB12	protocadherin beta 12	Q7L8S5	OTUD6A	OTU deubiquitinase 6A	Q5JPH6	EARS2	glutamyl-tRNA synthetase 2, mitochondrial	Q5JPH6	EARS2	glutamyl-tRNA synthetase 2, mitochondrial				Q494R4	CCDC153	coiled-coil domain containing 153
Q8NGI9	OR5A2	olfactory receptor family 5 subfamily A member 2	Q32NC0	C18orf21	chromosome 18 open reading frame 21	Q9NVD7	PARVA	parvin alpha	Q96JD6	AKR1E2	aldo-keto reductase family 1 member E2	Q96JD6	AKR1E2	aldo-keto reductase family 1 member E2				Q9Y5P4	CERT1	ceramide transporter 1
Q8TF65	GIPC2	GIPC PDZ domain containing family member 2	Q96BD6	SPSB1	splA/ryanodine receptor domain and SOCS box containing 1	A6NFK2	GRXCR2	glutaredoxin and cysteine rich domain containing 2	P32929	CTH	cystathionine gamma-lyase	P32929	CTH	cystathionine gamma-lyase				Q6UQ28	PLET1	placenta expressed transcript 1
Q99706	KIR2DL4	killer cell immunoglobulin like receptor, two Ig domains and long cytoplasmic tail 4	Q92752	TNR	tenascin R	P08237	PFKM	phosphofructokinase, muscle	Q9NRA2	SLC17A5	solute carrier family 17 member 5	Q9NRA2	SLC17A5	solute carrier family 17 member 5				A6NKX4	SLC22A31	solute carrier family 22 member 31
A0A075B7E8	IGHV3OR16-13	immunoglobulin heavy variable 3/OR16-13 (non-functional)	Q96RL6	SIGLEC11	sialic acid binding Ig like lectin 11	P34130	NTF4	neurotrophin 4	O14556	GAPDHS	glyceraldehyde-3-phosphate dehydrogenase, spermatogenic	O14556	GAPDHS	glyceraldehyde-3-phosphate dehydrogenase, spermatogenic				Q86U90	YRDC	yrdC N6-threonylcarbamoyltransferase domain containing
Q9NPH5	NOX4	NADPH oxidase 4	P23409	MYF6	myogenic factor 6	P49662	CASP4	caspase 4	Q6PXP3	SLC2A7	solute carrier family 2 member 7	Q6PXP3	SLC2A7	solute carrier family 2 member 7				Q8N443	RIBC1	RIB43A domain with coiled-coils 1
A0A075B6N4	TRBV25-1	T cell receptor beta variable 25-1	P52294	KPNA1	karyopherin subunit alpha 1	Q9Y6I4	USP3	ubiquitin specific peptidase 3	Q8N8U2	CDYL2	chromodomain Y like 2	Q8N8U2	CDYL2	chromodomain Y like 2				Q07065	CKAP4	cytoskeleton associated protein 4
Q8NGJ4	OR52E2	olfactory receptor family 52 subfamily E member 2	Q14444	CAPRIN1	cell cycle associated protein 1	Q8NGS8	OR13C5	olfactory receptor family 13 subfamily C member 5	Q9GZV1	ANKRD2	ankyrin repeat domain 2	Q9GZV1	ANKRD2	ankyrin repeat domain 2				Q5JQC9	AKAP4	A-kinase anchoring protein 4
Q9NZ08	ERAP1	endoplasmic reticulum aminopeptidase 1	Q9UDY6	TRIM10	tripartite motif containing 10	Q5T0B9	ZNF362	zinc finger protein 362	Q7L7V1	DHX32	DEAH-box helicase 32 (putative)	Q7L7V1	DHX32	DEAH-box helicase 32 (putative)				Q6T4R5	NHS	NHS actin remodeling regulator
Q6ZRR7	LRRC9	leucine rich repeat containing 9	Q7L591	DOK3	docking protein 3	Q5W0N0	C9orf57	chromosome 9 open reading frame 57	Q96EH3	MALSU1	mitochondrial assembly of ribosomal large subunit 1	Q96EH3	MALSU1	mitochondrial assembly of ribosomal large subunit 1				Q9UBS5	GABBR1	gamma-aminobutyric acid type B receptor subunit 1
P61970	NUTF2	nuclear transport factor 2	P30153	PPP2R1A	protein phosphatase 2 scaffold subunit Aalpha	Q6ZN30	BNC2	basonuclin zinc finger protein 2	Q8N8Q3	ENDOV	endonuclease V	Q8N8Q3	ENDOV	endonuclease V				Q9BRI3	SLC30A2	solute carrier family 30 member 2
P37840	SNCA	synuclein alpha	Q9Y5E8	PCDHB15	protocadherin beta 15	Q9NS00	C1GALT1	core 1 synthase, glycoprotein-N-acetylgalactosamine 3-beta-galactosyltransferase 1	O43488	AKR7A2	aldo-keto reductase family 7 member A2	O43488	AKR7A2	aldo-keto reductase family 7 member A2				Q9BQD7	ANTKMT	adenine nucleotide translocase lysine methyltransferase
P0C623	OR4Q2	olfactory receptor family 4 subfamily Q member 2 (gene/pseudogene)	Q9Y5G5	PCDHGA8	protocadherin gamma subfamily A, 8	P41236	PPP1R2	protein phosphatase 1 regulatory inhibitor subunit 2	P17516	AKR1C4	aldo-keto reductase family 1 member C4	P17516	AKR1C4	aldo-keto reductase family 1 member C4				Q14534	SQLE	squalene epoxidase
A0A0J9YX75	TRBV6-9	T cell receptor beta variable 6-9	Q8IZF6	ADGRG4	adhesion G protein-coupled receptor G4	A6NNX1	RIIAD1	regulatory subunit of type II PKA R-subunit domain containing 1	P21695	GPD1	glycerol-3-phosphate dehydrogenase 1	P21695	GPD1	glycerol-3-phosphate dehydrogenase 1				Q96Q35	FLACC1	flagellum associated containing coiled-coil domains 1
Q3LXA3	TKFC	triokinase and FMN cyclase	P30154	PPP2R1B	protein phosphatase 2 scaffold subunit Abeta	O95864	FADS2	fatty acid desaturase 2	Q96LJ7	DHRS1	dehydrogenase/reductase 1	Q96LJ7	DHRS1	dehydrogenase/reductase 1				Q8WUX1	SLC38A5	solute carrier family 38 member 5
Q969N4	TAAR8	trace amine associated receptor 8	P57053	H2BC12L	H2B clustered histone 12 like	Q8IYI6	EXOC8	exocyst complex component 8	P42330	AKR1C3	aldo-keto reductase family 1 member C3	P42330	AKR1C3	aldo-keto reductase family 1 member C3				P35523	CLCN1	chloride voltage-gated channel 1
Q9BZJ7	GPR62	G protein-coupled receptor 62	Q5ZPR3	CD276	CD276 molecule	B8ZZ34	SHISA8	shisa family member 8	A0PJK1	SLC5A10	solute carrier family 5 member 10	A0PJK1	SLC5A10	solute carrier family 5 member 10				Q8N4G2	ARL14	ADP ribosylation factor like GTPase 14
O95363	FARS2	phenylalanyl-tRNA synthetase 2, mitochondrial	Q13308	PTK7	protein tyrosine kinase 7 (inactive)	Q96JM2	ZNF462	zinc finger protein 462	Q13268	DHRS2	dehydrogenase/reductase 2	Q13268	DHRS2	dehydrogenase/reductase 2				O75628	REM1	RRAD and GEM like GTPase 1
Q9UI32	GLS2	glutaminase 2	Q13651	IL10RA	interleukin 10 receptor subunit alpha	Q96FC7	PHYHIPL	phytanoyl-CoA 2-hydroxylase interacting protein like	O75715	GPX5	glutathione peroxidase 5	O75715	GPX5	glutathione peroxidase 5				Q92878	RAD50	RAD50 double strand break repair protein
Q9Y6M7	SLC4A7	solute carrier family 4 member 7	P46734	MAP2K3	mitogen-activated protein kinase kinase 3	P11717	IGF2R	insulin like growth factor 2 receptor	Q9UHB4	NDOR1	NADPH dependent diflavin oxidoreductase 1	Q9UHB4	NDOR1	NADPH dependent diflavin oxidoreductase 1				Q9UBQ6	EXTL2	exostosin like glycosyltransferase 2
Q8NHC8	OR2T6	olfactory receptor family 2 subfamily T member 6	Q96T21	SECISBP2	SECIS binding protein 2	Q7Z7L1	SLFN11	schlafen family member 11	O60888	CUTA	cutA divalent cation tolerance homolog	O60888	CUTA	cutA divalent cation tolerance homolog				O95073	FSBP	fibrinogen silencer binding protein
P28566	HTR1E	5-hydroxytryptamine receptor 1E	O95837	GNA14	G protein subunit alpha 14	Q9H175	CSRNP2	cysteine and serine rich nuclear protein 2	P32322	PYCR1	pyrroline-5-carboxylate reductase 1	P32322	PYCR1	pyrroline-5-carboxylate reductase 1				Q8IXS6	PALM2	paralemmin 2
Q14147	DHX34	DExH-box helicase 34	Q6NXT2	H3-5	H3.5 histone	Q07352	ZFP36L1	ZFP36 ring finger protein like 1	Q9Y6F8	CDY1	chromodomain Y-linked 1	Q9Y6F8	CDY1	chromodomain Y-linked 1				Q12870	TCF15	transcription factor 15
Q9H222	ABCG5	ATP binding cassette subfamily G member 5	Q9UHF4	IL20RA	interleukin 20 receptor subunit alpha	Q96CA5	BIRC7	baculoviral IAP repeat containing 7	P0CG22	DHRS4L1	dehydrogenase/reductase 4 like 1 (pseudogene)	P0CG22	DHRS4L1	dehydrogenase/reductase 4 like 1 (pseudogene)				A4D126	CRPPA	CDP-L-ribitol pyrophosphorylase A
Q53H64	ANKRD40CL	ANKRD40 C-terminal like	Q93079	H2BC9	H2B clustered histone 9	P09525	ANXA4	annexin A4	P30044	PRDX5	peroxiredoxin 5	P30044	PRDX5	peroxiredoxin 5				P30043	BLVRB	biliverdin reductase B
Q9BYC9	MRPL20	mitochondrial ribosomal protein L20	Q9Y5F9	PCDHGB6	protocadherin gamma subfamily B, 6	Q9NQ90	ANO2	anoctamin 2	Q8NBQ5	HSD17B11	hydroxysteroid 17-beta dehydrogenase 11	Q8NBQ5	HSD17B11	hydroxysteroid 17-beta dehydrogenase 11				A6NH57	ARL5C	ADP ribosylation factor like GTPase 5C
Q9Y3N9	OR2W1	olfactory receptor family 2 subfamily W member 1	P41218	MNDA	myeloid cell nuclear differentiation antigen	P54760	EPHB4	EPH receptor B4	Q8N0X4	CLYBL	citramalyl-CoA lyase	Q8N0X4	CLYBL	citramalyl-CoA lyase				Q5I0G3	MDH1B	malate dehydrogenase 1B
Q9NXR5	ANKRD10	ankyrin repeat domain 10	Q8IWT0	ZBTB8OS	zinc finger and BTB domain containing 8 opposite strand	Q9BW30	TPPP3	tubulin polymerization promoting protein family member 3	Q8IX18	DHX40	DEAH-box helicase 40	Q8IX18	DHX40	DEAH-box helicase 40				Q8WWN9	IPCEF1	interaction protein for cytohesin exchange factors 1
Q5FWF4	ZRANB3	zinc finger RANBP2-type containing 3	O14786	NRP1	neuropilin 1	Q496M5	PLK5	polo like kinase 5 (inactive)	O75891	ALDH1L1	aldehyde dehydrogenase 1 family member L1	O75891	ALDH1L1	aldehyde dehydrogenase 1 family member L1				Q9BXF6	RAB11FIP5	RAB11 family interacting protein 5
P46095	GPR6	G protein-coupled receptor 6	P14373	TRIM27	tripartite motif containing 27	A6NIN4	RNF227	ring finger protein 227	Q5TF39	MFSD4B	major facilitator superfamily domain containing 4B	Q5TF39	MFSD4B	major facilitator superfamily domain containing 4B				O75030	MITF	melanocyte inducing transcription factor
Q9UBI1	COMMD3	COMM domain containing 3	Q99959	PKP2	plakophilin 2	P15328	FOLR1	folate receptor alpha	Q9H9E1	ANKRA2	ankyrin repeat family A member 2	Q9H9E1	ANKRA2	ankyrin repeat family A member 2				P82932	MRPS6	mitochondrial ribosomal protein S6
Q9Y252	RNF6	ring finger protein 6	Q9UEW8	STK39	serine/threonine kinase 39	Q9BQT8	SLC25A21	solute carrier family 25 member 21	Q86YB7	ECHDC2	enoyl-CoA hydratase domain containing 2	Q86YB7	ECHDC2	enoyl-CoA hydratase domain containing 2				Q16206	ENOX2	ecto-NOX disulfide-thiol exchanger 2
Q6UXT8	ALKAL1	ALK and LTK ligand 1	Q9Y375	NDUFAF1	NADH:ubiquinone oxidoreductase complex assembly factor 1	Q9Y661	HS3ST4	heparan sulfate-glucosamine 3-sulfotransferase 4	Q8IZ69	TRMT2A	tRNA methyltransferase 2 homolog A	Q8IZ69	TRMT2A	tRNA methyltransferase 2 homolog A				P36404	ARL2	ADP ribosylation factor like GTPase 2
Q5XG87	TENT4A	terminal nucleotidyltransferase 4A	P50914	RPL14	ribosomal protein L14	O43174	CYP26A1	cytochrome P450 family 26 subfamily A member 1	Q8TE96	DQX1	DEAQ-box RNA dependent ATPase 1	Q8TE96	DQX1	DEAQ-box RNA dependent ATPase 1				Q03060	CREM	cAMP responsive element modulator
Q9H853	TUBA4B	tubulin alpha 4b	Q9Y3C4	TPRKB	TP53RK binding protein	Q2MV58	TCTN1	tectonic family member 1	Q9P2T1	GMPR2	guanosine monophosphate reductase 2	Q9P2T1	GMPR2	guanosine monophosphate reductase 2				Q9NQ87	HEYL	hes related family bHLH transcription factor with YRPW motif like
Q8IZP2	ST13P4	ST13, Hsp70 interacting protein pseudogene 4	Q96L12	CALR3	calreticulin 3	Q6ISB3	GRHL2	grainyhead like transcription factor 2	O43280	TREH	trehalase	O43280	TREH	trehalase				P43034	PAFAH1B1	platelet activating factor acetylhydrolase 1b regulatory subunit 1
O43242	PSMD3	proteasome 26S subunit, non-ATPase 3	Q674X7	KAZN	kazrin, periplakin interacting protein	P20823	HNF1A	HNF1 homeobox A	Q9Y3E2	BOLA1	bolA family member 1	Q9Y3E2	BOLA1	bolA family member 1				A8MYZ6	FOXO6	forkhead box O6
F5H284	PPIAL4D	peptidylprolyl isomerase A like 4D	Q02045	MYL5	myosin light chain 5	O95843	GUCA1C	guanylate cyclase activator 1C	Q8NA29	MFSD2A	MFSD2 lysolipid transporter A, lysophospholipid	Q8NA29	MFSD2A	MFSD2 lysolipid transporter A, lysophospholipid				O95229	ZWINT	ZW10 interacting kinetochore protein
Q6Q788	APOA5	apolipoprotein A5	Q8NER5	ACVR1C	activin A receptor type 1C	A6NL88	SHISA7	shisa family member 7	Q6A555	TXNDC8	thioredoxin domain containing 8	Q6A555	TXNDC8	thioredoxin domain containing 8				Q6YP21	KYAT3	kynurenine aminotransferase 3
Q16772	GSTA3	glutathione S-transferase alpha 3	Q14692	BMS1	BMS1 ribosome biogenesis factor	Q49AA0	ZFP69	ZFP69 zinc finger protein	Q9H5Z1	DHX35	DEAH-box helicase 35	Q9H5Z1	DHX35	DEAH-box helicase 35				Q8N7C0	LRRC52	leucine rich repeat containing 52
Q969V4	TEKT1	tektin 1	Q99525	H4C7	H4 clustered histone 7	O15055	PER2	period circadian regulator 2	Q9NUI1	DECR2	2,4-dienoyl-CoA reductase 2	Q9NUI1	DECR2	2,4-dienoyl-CoA reductase 2				Q5W0B1	OBI1	ORC ubiquitin ligase 1
Q9Y371	SH3GLB1	SH3 domain containing GRB2 like, endophilin B1	Q9NQ55	PPAN	peter pan homolog	P48307	TFPI2	tissue factor pathway inhibitor 2	P31639	SLC5A2	solute carrier family 5 member 2	P31639	SLC5A2	solute carrier family 5 member 2				Q6ISU1	PTCRA	pre T cell antigen receptor alpha
Q7Z6J2	TAMALIN	trafficking regulator and scaffold protein tamalin	P24394	IL4R	interleukin 4 receptor	P46020	PHKA1	phosphorylase kinase regulatory subunit alpha 1	Q96AB3	ISOC2	isochorismatase domain containing 2	Q96AB3	ISOC2	isochorismatase domain containing 2				P22234	PAICS	phosphoribosylaminoimidazole carboxylase and phosphoribosylaminoimidazolesuccinocarboxamide synthase
P28161	GSTM2	glutathione S-transferase mu 2	Q14289	PTK2B	protein tyrosine kinase 2 beta	Q15040	JOSD1	Josephin domain containing 1	A6NK58	LIPT2	lipoyl(octanoyl) transferase 2	A6NK58	LIPT2	lipoyl(octanoyl) transferase 2				Q8N8A8	FAM169BP	family with sequence similarity 169 member B, pseudogene
Q8N328	PGBD3	piggyBac transposable element derived 3	P63218	GNG5	G protein subunit gamma 5	Q8N3F8	MICALL1	MICAL like 1	P31350	RRM2	ribonucleotide reductase regulatory subunit M2	P31350	RRM2	ribonucleotide reductase regulatory subunit M2				P15153	RAC2	Rac family small GTPase 2
P21266	GSTM3	glutathione S-transferase mu 3	P20916	MAG	myelin associated glycoprotein	Q9UNN4	GTF2A1L	general transcription factor IIA subunit 1 like	Q9H765	ASB8	ankyrin repeat and SOCS box containing 8	Q9H765	ASB8	ankyrin repeat and SOCS box containing 8				P23760	PAX3	paired box 3
O14776	TCERG1	transcription elongation regulator 1	Q13952	NFYC	nuclear transcription factor Y subunit gamma	Q6IPT2	GARIN5A	golgi associated RAB2 interactor 5A	O00337	SLC28A1	solute carrier family 28 member 1	O00337	SLC28A1	solute carrier family 28 member 1				P0DPD7	EEF1AKMT4	EEF1A lysine methyltransferase 4
Q9NP80	PNPLA8	patatin like phospholipase domain containing 8	Q9H089	LSG1	large 60S subunit nuclear export GTPase 1	P12259	F5	coagulation factor V	P54652	HSPA2	heat shock protein family A (Hsp70) member 2	P54652	HSPA2	heat shock protein family A (Hsp70) member 2				Q9NZB8	MOCS1	molybdenum cofactor synthesis 1
Q8N7P1	PLD5	phospholipase D family member 5	P0C2W1	FBXO45	F-box protein 45	P15882	CHN1	chimerin 1	O00757	FBP2	fructose-bisphosphatase 2	O00757	FBP2	fructose-bisphosphatase 2				Q86XT9	TMEM219	transmembrane protein 219
P35462	DRD3	dopamine receptor D3	O75817	POP7	POP7 homolog, ribonuclease P/MRP subunit	P49768	PSEN1	presenilin 1	Q96CM3	RPUSD4	RNA pseudouridine synthase D4	Q96CM3	RPUSD4	RNA pseudouridine synthase D4				Q96CD2	PPCDC	phosphopantothenoylcysteine decarboxylase
Q9NRH2	SNRK	SNF related kinase	Q59GN2	RPL39P5	ribosomal protein L39 pseudogene 5	O94941	UBOX5	U-box domain containing 5	P18283	GPX2	glutathione peroxidase 2	P18283	GPX2	glutathione peroxidase 2				O60939	SCN2B	sodium voltage-gated channel beta subunit 2
Q9UF47	DNAJC5B	DnaJ heat shock protein family (Hsp40) member C5 beta	Q13765	NACA	nascent polypeptide associated complex subunit alpha	Q96HA7	TONSL	tonsoku like, DNA repair protein	Q9Y2Z4	YARS2	tyrosyl-tRNA synthetase 2	Q9Y2Z4	YARS2	tyrosyl-tRNA synthetase 2				P11912	CD79A	CD79a molecule
Q12894	IFRD2	interferon related developmental regulator 2	Q96QK1	VPS35	VPS35 retromer complex component	A6NJR5		Putative speedy protein-like protein 3	Q7Z5J1	HSD11B1L	hydroxysteroid 11-beta dehydrogenase 1 like	Q7Z5J1	HSD11B1L	hydroxysteroid 11-beta dehydrogenase 1 like				Q9NT22	EMILIN3	elastin microfibril interfacer 3
O15120	AGPAT2	1-acylglycerol-3-phosphate O-acyltransferase 2	Q9UBL3	ASH2L	ASH2 like, histone lysine methyltransferase complex subunit	Q8WVM8	SCFD1	sec1 family domain containing 1	Q8IWW8	ADHFE1	alcohol dehydrogenase iron containing 1	Q8IWW8	ADHFE1	alcohol dehydrogenase iron containing 1				Q6I9Y2	THOC7	THO complex subunit 7
O14641	DVL2	dishevelled segment polarity protein 2	Q8WTR2	DUSP19	dual specificity phosphatase 19	Q6ZMT1	STAC2	SH3 and cysteine rich domain 2	Q9NWU1	OXSM	3-oxoacyl-ACP synthase, mitochondrial	Q9NWU1	OXSM	3-oxoacyl-ACP synthase, mitochondrial				A0A1W2PQ72	MSANTD7	Myb/SANT DNA binding domain containing 7
O95866	MPIG6B	megakaryocyte and platelet inhibitory receptor G6b	Q71DI3	H3C15	H3 clustered histone 15	P01859	IGHG2	immunoglobulin heavy constant gamma 2 (G2m marker)	Q8N2U0	TMEM256	transmembrane protein 256	Q8N2U0	TMEM256	transmembrane protein 256				Q9BWW8	APOL6	apolipoprotein L6
P07686	HEXB	hexosaminidase subunit beta	Q16778	H2BC21	H2B clustered histone 21	Q9P260	RELCH	RAB11 binding and LisH domain, coiled-coil and HEAT repeat containing	P13995	MTHFD2	methylenetetrahydrofolate dehydrogenase (NADP+ dependent) 2, methenyltetrahydrofolate cyclohydrolase	P13995	MTHFD2	methylenetetrahydrofolate dehydrogenase (NADP+ dependent) 2, methenyltetrahydrofolate cyclohydrolase				Q9BVG3	TRIM62	tripartite motif containing 62
Q9HAR2	ADGRL3	adhesion G protein-coupled receptor L3	P27824	CANX	calnexin	Q8TEQ6	GEMIN5	gem nuclear organelle associated protein 5	Q96C36	PYCR2	pyrroline-5-carboxylate reductase 2	Q96C36	PYCR2	pyrroline-5-carboxylate reductase 2				Q9H6S1	AZI2	5-azacytidine induced 2
Q9H6Y5	MAGIX	MAGI family member, X-linked	O75533	SF3B1	splicing factor 3b subunit 1	Q96DM3	RMC1	regulator of MON1-CCZ1	Q8N695	SLC5A8	solute carrier family 5 member 8	Q8N695	SLC5A8	solute carrier family 5 member 8				Q9H902	REEP1	receptor accessory protein 1
Q9H426	RIMS4	regulating synaptic membrane exocytosis 4	Q92750	TAF4B	TATA-box binding protein associated factor 4b	Q9P278	FNIP2	folliculin interacting protein 2	P14061	HSD17B1	hydroxysteroid 17-beta dehydrogenase 1	P14061	HSD17B1	hydroxysteroid 17-beta dehydrogenase 1				P0CW27	CCDC166	coiled-coil domain containing 166
Q15759	MAPK11	mitogen-activated protein kinase 11	O14737	PDCD5	programmed cell death 5	Q92643	PIGK	phosphatidylinositol glycan anchor biosynthesis class K	Q14409	GK3P	Glycerol kinase 3 (GK 3) (Glycerokinase 3) (EC 2.7.1.30) (ATP:glycerol 3-phosphotransferase 3) (Glycerol kinase 3 pseudogene) (Glycerol kinase, testis specific 1)	Q14409	GK3P	Glycerol kinase 3 (GK 3) (Glycerokinase 3) (EC 2.7.1.30) (ATP:glycerol 3-phosphotransferase 3) (Glycerol kinase 3 pseudogene) (Glycerol kinase, testis specific 1)				Q96IZ0	PAWR	pro-apoptotic WT1 regulator
Q9BTM9	URM1	ubiquitin related modifier 1	Q9Y5F8	PCDHGB7	protocadherin gamma subfamily B, 7	Q99928	GABRG3	gamma-aminobutyric acid type A receptor subunit gamma3	Q8WUX2	CHAC2	ChaC glutathione specific gamma-glutamylcyclotransferase 2	Q8WUX2	CHAC2	ChaC glutathione specific gamma-glutamylcyclotransferase 2				Q9H228	S1PR5	sphingosine-1-phosphate receptor 5
Q13478	IL18R1	interleukin 18 receptor 1	Q96M98	PACRG	parkin coregulated	P60520	GABARAPL2	GABA type A receptor associated protein like 2	P17066	HSPA6	heat shock protein family A (Hsp70) member 6	P17066	HSPA6	heat shock protein family A (Hsp70) member 6				Q9NUM3	SLC39A9	solute carrier family 39 member 9
Q8WX39	LCN9	lipocalin 9	O60330	PCDHGA12	protocadherin gamma subfamily A, 12	E9PQ18	XNDC1N	XRCC1 N-terminal domain containing 1, N-terminal like	Q9UGM6	WARS2	tryptophanyl tRNA synthetase 2, mitochondrial	Q9UGM6	WARS2	tryptophanyl tRNA synthetase 2, mitochondrial				Q8IVU9	CABCOCO1	ciliary associated calcium binding coiled-coil 1
Q96P69	GPR78	G protein-coupled receptor 78	P62910	RPL32	ribosomal protein L32	Q5UCC4	EMC10	ER membrane protein complex subunit 10	Q04837	SSBP1	single stranded DNA binding protein 1	Q04837	SSBP1	single stranded DNA binding protein 1				O95406	CNIH1	cornichon family AMPA receptor auxiliary protein 1
P09958	FURIN	furin, paired basic amino acid cleaving enzyme	P0DPK5	H3Y2	H3.Y histone 2	P25311	AZGP1	alpha-2-glycoprotein 1, zinc-binding	P37837	TALDO1	transaldolase 1	P37837	TALDO1	transaldolase 1				Q8IWU6	SULF1	sulfatase 1
Q6UX04	CWC27	CWC27 spliceosome associated cyclophilin	Q15543	TAF13	TATA-box binding protein associated factor 13	Q5JVG2	ZNF484	zinc finger protein 484	P20292	ALOX5AP	arachidonate 5-lipoxygenase activating protein	P20292	ALOX5AP	arachidonate 5-lipoxygenase activating protein				Q6ZRS4	ITPRID1	ITPR interacting domain containing 1
Q9H479	FN3K	fructosamine 3 kinase	Q6IPR3	TYW3	tRNA-yW synthesizing protein 3 homolog	P23025	XPA	XPA, DNA damage recognition and repair factor	P41181	AQP2	aquaporin 2	P41181	AQP2	aquaporin 2				Q96C10	DHX58	DExH-box helicase 58
Q9P1P4	TAAR3P	trace amine associated receptor 3, pseudogene	Q8N6P7	IL22RA1	interleukin 22 receptor subunit alpha 1	P01876	IGHA1	immunoglobulin heavy constant alpha 1	Q14191	WRN	WRN RecQ like helicase	Q14191	WRN	WRN RecQ like helicase				P23508	MCC	MCC regulator of WNT signaling pathway
Q9Y337	KLK5	kallikrein related peptidase 5	Q9UI08	EVL	Enah/Vasp-like	O15031	PLXNB2	plexin B2	P04406	GAPDH	glyceraldehyde-3-phosphate dehydrogenase	P04406	GAPDH	glyceraldehyde-3-phosphate dehydrogenase				Q15415	RBMY1F	RNA binding motif protein Y-linked family 1 member F
P0DN81	OR13C7	olfactory receptor family 13 subfamily C member 7 (gene/pseudogene)	Q9Y5I0	PCDHA13	protocadherin alpha 13	Q86XA9	HEATR5A	HEAT repeat containing 5A	Q99714	HSD17B10	hydroxysteroid 17-beta dehydrogenase 10	Q99714	HSD17B10	hydroxysteroid 17-beta dehydrogenase 10				Q9UKJ3	GPATCH8	G-patch domain containing 8
Q13283	G3BP1	G3BP stress granule assembly factor 1	Q93073	SECISBP2L	SECIS binding protein 2 like	Q9NXF8	ZDHHC7	zinc finger DHHC-type palmitoyltransferase 7	Q9NRM0	SLC2A9	solute carrier family 2 member 9	Q9NRM0	SLC2A9	solute carrier family 2 member 9				Q96AP0	ACD	ACD shelterin complex subunit and telomerase recruitment factor
A6NK44	GLOD5	glyoxalase domain containing 5	P18077	RPL35A	ribosomal protein L35a	Q9Y6X4	FAM169A	family with sequence similarity 169 member A	Q9Y697	NFS1	NFS1 cysteine desulfurase	Q9Y697	NFS1	NFS1 cysteine desulfurase				Q9UPX6	MINAR1	membrane integral NOTCH2 associated receptor 1
Q8NH08	OR10AC1	olfactory receptor family 10 subfamily AC member 1 (gene/pseudogene)	Q8WXI7	MUC16	mucin 16, cell surface associated	P08069	IGF1R	insulin like growth factor 1 receptor	P26885	FKBP2	FKBP prolyl isomerase 2	P26885	FKBP2	FKBP prolyl isomerase 2				Q9UHE5	NAT8	N-acetyltransferase 8 (putative)
U3KPV4	A3GALT2	alpha 1,3-galactosyltransferase 2	O75173	ADAMTS4	ADAM metallopeptidase with thrombospondin type 1 motif 4	A0A087X179	TBC1D3E	TBC1 domain family member 3E	Q13520	AQP6	aquaporin 6	Q13520	AQP6	aquaporin 6				Q9H8H3	METTL7A	Putative methyltransferase-like protein 7A (EC 2.1.1.-) (Protein AAM-B)
P19801	AOC1	amine oxidase copper containing 1	Q9Y5H1	PCDHGA2	protocadherin gamma subfamily A, 2	Q7Z419	RNF144B	ring finger protein 144B	P51857	AKR1D1	aldo-keto reductase family 1 member D1	P51857	AKR1D1	aldo-keto reductase family 1 member D1				Q9NVC3	SLC38A7	solute carrier family 38 member 7
Q8NGE8	OR4D9	olfactory receptor family 4 subfamily D member 9	O43617	TRAPPC3	trafficking protein particle complex subunit 3	O00570	SOX1	SRY-box transcription factor 1	P10809	HSPD1	heat shock protein family D (Hsp60) member 1	P10809	HSPD1	heat shock protein family D (Hsp60) member 1				Q8NHU0	CT45A3	cancer/testis antigen family 45 member A3
Q7Z6G8	ANKS1B	ankyrin repeat and sterile alpha motif domain containing 1B	O15160	POLR1C	RNA polymerase I and III subunit C	Q6ZS17	RIPOR1	RHO family interacting cell polarization regulator 1	Q92506	HSD17B8	hydroxysteroid 17-beta dehydrogenase 8	Q92506	HSD17B8	hydroxysteroid 17-beta dehydrogenase 8				O95210	STBD1	starch binding domain 1
Q8N808	SLC35G3	solute carrier family 35 member G3	A0A1W2PPE2	TAF11L4	TATA-box binding protein associated factor 11 like 4	Q75T13	PGAP1	post-GPI attachment to proteins inositol deacylase 1	Q9NXC2	GFOD1	Gfo/Idh/MocA-like oxidoreductase domain containing 1	Q9NXC2	GFOD1	Gfo/Idh/MocA-like oxidoreductase domain containing 1				Q8NBT2	SPC24	SPC24 component of NDC80 kinetochore complex
Q00887	PSG9	pregnancy specific beta-1-glycoprotein 9	O96004	HAND1	heart and neural crest derivatives expressed 1	P34947	GRK5	G protein-coupled receptor kinase 5	P83876	TXNL4A	thioredoxin like 4A	P83876	TXNL4A	thioredoxin like 4A				O14936	CASK	calcium/calmodulin dependent serine protein kinase
Q8WZ19	KCTD13	potassium channel tetramerization domain containing 13	P09132	SRP19	signal recognition particle 19	Q86WZ0	HEATR4	HEAT repeat containing 4	O15067	PFAS	phosphoribosylformylglycinamidine synthase	O15067	PFAS	phosphoribosylformylglycinamidine synthase				P23588	EIF4B	eukaryotic translation initiation factor 4B
P42574	CASP3	caspase 3	Q16666	IFI16	interferon gamma inducible protein 16	Q06787	FMR1	fragile X messenger ribonucleoprotein 1	P55084	HADHB	hydroxyacyl-CoA dehydrogenase trifunctional multienzyme complex subunit beta	P55084	HADHB	hydroxyacyl-CoA dehydrogenase trifunctional multienzyme complex subunit beta				Q8NFW9	MYRIP	myosin VIIA and Rab interacting protein
Q96E52	OMA1	OMA1 zinc metallopeptidase	Q6PJ21	SPSB3	splA/ryanodine receptor domain and SOCS box containing 3	Q5JST6	EFHC2	EF-hand domain containing 2	Q92482	AQP3	aquaporin 3 (Gill blood group)	Q92482	AQP3	aquaporin 3 (Gill blood group)				O75335	PPFIA4	PTPRF interacting protein alpha 4
Q9BXB1	LGR4	leucine rich repeat containing G protein-coupled receptor 4	O96017	CHEK2	checkpoint kinase 2	Q96EP0	RNF31	ring finger protein 31	Q04828	AKR1C1	aldo-keto reductase family 1 member C1	Q04828	AKR1C1	aldo-keto reductase family 1 member C1				O76013	KRT36	keratin 36
P59551	TAS2R60	taste 2 receptor member 60	Q9HCU8	POLD4	DNA polymerase delta 4, accessory subunit	Q8WUH1	CHURC1	churchill domain containing 1	Q15084	PDIA6	protein disulfide isomerase family A member 6	Q15084	PDIA6	protein disulfide isomerase family A member 6				Q96QE2	SLC2A13	solute carrier family 2 member 13
Q8NGZ2	OR14K1	olfactory receptor family 14 subfamily K member 1	P62899	RPL31	ribosomal protein L31	Q6P280	ZNF529	zinc finger protein 529	O75394	MRPL33	mitochondrial ribosomal protein L33	O75394	MRPL33	mitochondrial ribosomal protein L33				Q9NP90	RAB9B	RAB9B, member RAS oncogene family
A0A1B0GVD1	FAM237B	family with sequence similarity 237 member B	Q8IYM9	TRIM22	tripartite motif containing 22	Q86T29	ZNF605	zinc finger protein 605	P16435	POR	cytochrome p450 oxidoreductase	P16435	POR	cytochrome p450 oxidoreductase				O15213	WDR46	WD repeat domain 46
Q00059	TFAM	transcription factor A, mitochondrial	A0A1W2PPW3	TAF11L12	TATA-box binding protein associated factor 11 like 12	Q8TC26	TMEM163	transmembrane protein 163	P33316	DUT	deoxyuridine triphosphatase	P33316	DUT	deoxyuridine triphosphatase				P55040	GEM	GTP binding protein overexpressed in skeletal muscle
Q8NGL6	OR4A15	olfactory receptor family 4 subfamily A member 15	Q4G0G5	SCGB2B2	secretoglobin family 2B member 2	Q9NVR0	KLHL11	kelch like family member 11	Q9Y5R4	HEMK1	HemK methyltransferase family member 1	Q9Y5R4	HEMK1	HemK methyltransferase family member 1				Q9HBR0	SLC38A10	solute carrier family 38 member 10
Q53G44	IFI44L	interferon induced protein 44 like	Q9HAF1	MEAF6	MYST/Esa1 associated factor 6	P08754	GNAI3	G protein subunit alpha i3	P50443	SLC26A2	solute carrier family 26 member 2	P50443	SLC26A2	solute carrier family 26 member 2				Q9H4B0	OSGEPL1	O-sialoglycoprotein endopeptidase like 1
Q8IYU4	UBQLNL	ubiquilin like	Q9BUA6	MYL10	myosin light chain 10	Q03828	EVX2	even-skipped homeobox 2	Q96EN8	MOCOS	molybdenum cofactor sulfurase	Q96EN8	MOCOS	molybdenum cofactor sulfurase				Q9Y3M2	CBY1	chibby 1, beta catenin antagonist
Q9H4A4	RNPEP	arginyl aminopeptidase	A0A1B0GUL7		Protein kinase domain-containing protein	Q9BT76	UPK3B	uroplakin 3B	Q13011	ECH1	enoyl-CoA hydratase 1	Q13011	ECH1	enoyl-CoA hydratase 1				Q96BP3	PPWD1	peptidylprolyl isomerase domain and WD repeat containing 1
Q9UMX0	UBQLN1	ubiquilin 1	Q6UXE8	BTNL3	butyrophilin like 3	Q9NZH6	IL37	interleukin 37	P40692	MLH1	mutL homolog 1	P40692	MLH1	mutL homolog 1				P11926	ODC1	ornithine decarboxylase 1
Q8IW52	SLITRK4	SLIT and NTRK like family member 4	Q9UQC2	GAB2	GRB2 associated binding protein 2	O95948	ONECUT2	one cut homeobox 2	Q14722	KCNAB1	potassium voltage-gated channel subfamily A regulatory beta subunit 1	Q14722	KCNAB1	potassium voltage-gated channel subfamily A regulatory beta subunit 1				Q8WVE0	EEF1AKMT1	EEF1A lysine methyltransferase 1
Q9NQ94	A1CF	APOBEC1 complementation factor	Q9Y5G6	PCDHGA7	protocadherin gamma subfamily A, 7	Q8NEM1	ZNF680	zinc finger protein 680	Q9H008	LHPP	phospholysine phosphohistidine inorganic pyrophosphate phosphatase	Q9H008	LHPP	phospholysine phosphohistidine inorganic pyrophosphate phosphatase				Q5VXT5	SYPL2	synaptophysin like 2
P09874	PARP1	poly(ADP-ribose) polymerase 1	Q9BQ08	RETNLB	resistin like beta	O43361	ZNF749	zinc finger protein 749	O15527	OGG1	8-oxoguanine DNA glycosylase	O15527	OGG1	8-oxoguanine DNA glycosylase				Q5T7P8	SYT6	synaptotagmin 6
O95711	LY86	lymphocyte antigen 86	A2A288	ZC3H12D	zinc finger CCCH-type containing 12D	P56693	SOX10	SRY-box transcription factor 10	P15428	HPGD	15-hydroxyprostaglandin dehydrogenase	P15428	HPGD	15-hydroxyprostaglandin dehydrogenase				Q9P0K8	FOXJ2	forkhead box J2
Q9H9Y6	POLR1B	RNA polymerase I subunit B	P47929	LGALS7	galectin 7	Q8N108	MIER1	MIER1 transcriptional regulator	Q8N335	GPD1L	glycerol-3-phosphate dehydrogenase 1 like	Q8N335	GPD1L	glycerol-3-phosphate dehydrogenase 1 like				P40198	CEACAM3	CEA cell adhesion molecule 3
Q5FVE4	ACSBG2	acyl-CoA synthetase bubblegum family member 2	Q9HCM9	TRIM39	tripartite motif containing 39	O94759	TRPM2	transient receptor potential cation channel subfamily M member 2	P00813	ADA	adenosine deaminase	P00813	ADA	adenosine deaminase				Q92574	TSC1	TSC complex subunit 1
Q9Y6U7	RNF215	ring finger protein 215	Q8IU57	IFNLR1	interferon lambda receptor 1	Q56P03	EAPP	E2F associated phosphoprotein	Q8TD20	SLC2A12	solute carrier family 2 member 12	Q8TD20	SLC2A12	solute carrier family 2 member 12				A0A1W2PR48	TLE7	TLE family member 7
P35368	ADRA1B	adrenoceptor alpha 1B	P41214	EIF2D	eukaryotic translation initiation factor 2D	P52298	NCBP2	nuclear cap binding protein subunit 2	P30084	ECHS1	enoyl-CoA hydratase, short chain 1	P30084	ECHS1	enoyl-CoA hydratase, short chain 1				Q9UM01	SLC7A7	solute carrier family 7 member 7
Q496H8	NRN1L	neuritin 1 like	Q9NR33	POLE4	DNA polymerase epsilon 4, accessory subunit	Q9BU23	LMF2	lipase maturation factor 2	Q8TDB8	SLC2A14	solute carrier family 2 member 14	Q8TDB8	SLC2A14	solute carrier family 2 member 14				P09629	HOXB7	homeobox B7
Q86TG1	TMEM150A	transmembrane protein 150A	P55345	PRMT2	protein arginine methyltransferase 2	Q5VWX1	KHDRBS2	KH RNA binding domain containing, signal transduction associated 2	Q13423	NNT	nicotinamide nucleotide transhydrogenase	Q13423	NNT	nicotinamide nucleotide transhydrogenase				P06753	TPM3	tropomyosin 3
Q6P093	AADACL2	arylacetamide deacetylase like 2	Q6ZMU5	TRIM72	tripartite motif containing 72	O14544	SOCS6	suppressor of cytokine signaling 6	Q9Y3B8	REXO2	RNA exonuclease 2	Q9Y3B8	REXO2	RNA exonuclease 2				Q6EIG7	CLEC6A	C-type lectin domain containing 6A
Q96GD0	PDXP	pyridoxal phosphatase	Q9H992	MARCHF7	membrane associated ring-CH-type finger 7	Q49AJ0	FAM135B	family with sequence similarity 135 member B	P04818	TYMS	thymidylate synthetase	P04818	TYMS	thymidylate synthetase				Q3KR37	GRAMD1B	GRAM domain containing 1B
P21926	CD9	CD9 molecule	Q9UN70	PCDHGC3	protocadherin gamma subfamily C, 3	O60813	PRAMEF11	PRAME family member 11	Q14410	GK2	glycerol kinase 2	Q14410	GK2	glycerol kinase 2				Q8NHH9	ATL2	atlastin GTPase 2
Q86VN1	VPS36	vacuolar protein sorting 36 homolog	Q9Y5G4	PCDHGA9	protocadherin gamma subfamily A, 9	Q68DE3	USF3	upstream transcription factor family member 3	Q6ZS86	GK5	glycerol kinase 5	Q6ZS86	GK5	glycerol kinase 5				Q8WWZ4	ABCA10	ATP binding cassette subfamily A member 10
P45381	ASPA	aspartoacylase	P67812	SEC11A	SEC11 homolog A, signal peptidase complex subunit	Q8NGU2	OR9A4	olfactory receptor family 9 subfamily A member 4	Q7L1I2	SV2B	synaptic vesicle glycoprotein 2B	Q7L1I2	SV2B	synaptic vesicle glycoprotein 2B				P07951	TPM2	tropomyosin 2
Q96FJ2	DYNLL2	dynein light chain LC8-type 2	P09382	LGALS1	galectin 1	Q86WV6	STING1	stimulator of interferon response cGAMP interactor 1	Q9BW92	TARS2	threonyl-tRNA synthetase 2, mitochondrial	Q9BW92	TARS2	threonyl-tRNA synthetase 2, mitochondrial				P31277	HOXD11	homeobox D11
Q9Y6I9	TEX264	testis expressed 264, ER-phagy receptor	P0DP24	CALM2	calmodulin 2	O43548	TGM5	transglutaminase 5	Q96CN7	ISOC1	isochorismatase domain containing 1	Q96CN7	ISOC1	isochorismatase domain containing 1				Q16204	CCDC6	coiled-coil domain containing 6
P49913	CAMP	cathelicidin antimicrobial peptide	Q9Y5H0	PCDHGA3	protocadherin gamma subfamily A, 3	P04733	MT1F	metallothionein 1F	P07954	FH	fumarate hydratase	P07954	FH	fumarate hydratase				Q8TEP8	CEP192	centrosomal protein 192
Q9H8M1	COQ10B	coenzyme Q10B	P33993	MCM7	minichromosome maintenance complex component 7	Q8NCS7	SLC44A5	solute carrier family 44 member 5	B2RU33	POTEC	POTE ankyrin domain family member C	B2RU33	POTEC	POTE ankyrin domain family member C				Q13469	NFATC2	nuclear factor of activated T cells 2
Q15475	SIX1	SIX homeobox 1	Q6UXG8	BTNL9	butyrophilin like 9	Q12857	NFIA	nuclear factor I A	O43448	KCNAB3	potassium voltage-gated channel subfamily A regulatory beta subunit 3	O43448	KCNAB3	potassium voltage-gated channel subfamily A regulatory beta subunit 3				Q99853	FOXB1	forkhead box B1
P36268	GGT2P	gamma-glutamyltransferase 2, pseudogene	Q9Y6N8	CDH10	cadherin 10	Q8N1G1	REXO1	RNA exonuclease 1 homolog	P0DMV9	HSPA1B	heat shock protein family A (Hsp70) member 1B	P0DMV9	HSPA1B	heat shock protein family A (Hsp70) member 1B				Q14576	ELAVL3	ELAV like RNA binding protein 3
P22362	CCL1	C-C motif chemokine ligand 1	P63215	GNG3	G protein subunit gamma 3	Q9H8G2	CAAP1	caspase activity and apoptosis inhibitor 1	P46199	MTIF2	mitochondrial translational initiation factor 2	P46199	MTIF2	mitochondrial translational initiation factor 2				P98177	FOXO4	forkhead box O4
P11388	TOP2A	DNA topoisomerase II alpha	Q9BRU9	UTP23	UTP23 small subunit processome component	Q18PE1	DOK7	docking protein 7	Q86Y79	PTRH1	peptidyl-tRNA hydrolase 1 homolog	Q86Y79	PTRH1	peptidyl-tRNA hydrolase 1 homolog				Q5BKX6	SLC45A4	solute carrier family 45 member 4
O95070	YIF1A	Yip1 interacting factor homolog A, membrane trafficking protein	Q9NZT1	CALML5	calmodulin like 5	O75962	TRIO	trio Rho guanine nucleotide exchange factor	P22732	SLC2A5	solute carrier family 2 member 5	P22732	SLC2A5	solute carrier family 2 member 5				Q5HY92	FIGN	fidgetin, microtubule severing factor
Q6ZT21	TMPPE	transmembrane protein with metallophosphoesterase domain	P02741	CRP	C-reactive protein	P61353	RPL27	ribosomal protein L27	P26640	VARS1	valyl-tRNA synthetase 1	P26640	VARS1	valyl-tRNA synthetase 1				Q9H1B4	NXF5	nuclear RNA export factor 5
P00749	PLAU	plasminogen activator, urokinase	Q8TCE9	LGALS14	galectin 14	Q13158	FADD	Fas associated via death domain	A6NL99	AQP7P3	aquaporin 7 pseudogene 3	A6NL99	AQP7P3	aquaporin 7 pseudogene 3				Q8NEX9	SDR9C7	short chain dehydrogenase/reductase family 9C member 7
P51606	RENBP	renin binding protein	O75879	GATB	glutamyl-tRNA amidotransferase subunit B	P51965	UBE2E1	ubiquitin conjugating enzyme E2 E1	O76003	GLRX3	glutaredoxin 3	O76003	GLRX3	glutaredoxin 3				Q7Z353	HDX	highly divergent homeobox
Q96AJ1	CLUAP1	clusterin associated protein 1	O95905	ECD	ecdysoneless cell cycle regulator	Q96MI9	AGBL1	AGBL carboxypeptidase 1	P34931	HSPA1L	heat shock protein family A (Hsp70) member 1 like	P34931	HSPA1L	heat shock protein family A (Hsp70) member 1 like				P58304	VSX2	visual system homeobox 2
A0A0K0K1G8	TRBV10-2	T cell receptor beta variable 10-2	P62701	RPS4X	ribosomal protein S4 X-linked	O75973	C1QL1	complement C1q like 1	O00221	NFKBIE	NFKB inhibitor epsilon	O00221	NFKBIE	NFKB inhibitor epsilon				Q86UD5	SLC9B2	solute carrier family 9 member B2
Q96T52	IMMP2L	inner mitochondrial membrane peptidase subunit 2	O95361	TRIM16	tripartite motif containing 16	Q6QNK2	ADGRD1	adhesion G protein-coupled receptor D1	Q9UIJ7	AK3	adenylate kinase 3	Q9UIJ7	AK3	adenylate kinase 3				Q8NHY2	COP1	COP1 E3 ubiquitin ligase
P08910	ABHD2	abhydrolase domain containing 2, acylglycerol lipase	P51452	DUSP3	dual specificity phosphatase 3	P10073	ZSCAN22	zinc finger and SCAN domain containing 22	Q6YN16	HSDL2	hydroxysteroid dehydrogenase like 2	Q6YN16	HSDL2	hydroxysteroid dehydrogenase like 2				Q9H7F0	ATP13A3	ATPase 13A3
Q7LGA3	HS2ST1	heparan sulfate 2-O-sulfotransferase 1	Q9ULB4	CDH9	cadherin 9	Q8N1P7	CRYBG2	crystallin beta-gamma domain containing 2	Q9BZX2	UCK2	uridine-cytidine kinase 2	Q9BZX2	UCK2	uridine-cytidine kinase 2				O60361	NME2P1	NME2 pseudogene 1
Q8NFK1	GJC3	gap junction protein gamma 3	Q86SZ2	TRAPPC6B	trafficking protein particle complex subunit 6B	Q92537	SUSD6	sushi domain containing 6	Q7LBE3	SLC26A9	solute carrier family 26 member 9	Q7LBE3	SLC26A9	solute carrier family 26 member 9				O00505	KPNA3	karyopherin subunit alpha 3
Q6ZST4	LCNL1	lipocalin like 1	O95968	SCGB1D1	secretoglobin family 1D member 1	P10914	IRF1	interferon regulatory factor 1	P52701	MSH6	mutS homolog 6	P52701	MSH6	mutS homolog 6				Q8TC12	RDH11	retinol dehydrogenase 11
P51679	CCR4	C-C motif chemokine receptor 4	Q8IXT1	DDIAS	DNA damage induced apoptosis suppressor	Q06190	PPP2R3A	protein phosphatase 2 regulatory subunit B''alpha	P04183	TK1	thymidine kinase 1	P04183	TK1	thymidine kinase 1				Q9H0H3	KLHL25	kelch like family member 25
Q9BYG0	B3GNT5	UDP-GlcNAc:betaGal beta-1,3-N-acetylglucosaminyltransferase 5	Q8NCE0	TSEN2	tRNA splicing endonuclease subunit 2	Q9H9S4	CAB39L	calcium binding protein 39 like	P52815	MRPL12	mitochondrial ribosomal protein L12	P52815	MRPL12	mitochondrial ribosomal protein L12				Q6PD74	AAGAB	alpha and gamma adaptin binding protein
P50391	NPY4R	neuropeptide Y receptor Y4	P0DP25	CALM3	calmodulin 3	Q9H7P6	MVB12B	multivesicular body subunit 12B	Q9Y6F7	CDY2A	chromodomain Y-linked 2A	Q9Y6F7	CDY2A	chromodomain Y-linked 2A				Q5T013	HYI	hydroxypyruvate isomerase (putative)
P56134	ATP5MF	ATP synthase membrane subunit f	P29992	GNA11	G protein subunit alpha 11	P15374	UCHL3	ubiquitin C-terminal hydrolase L3	Q99735	MGST2	microsomal glutathione S-transferase 2	Q99735	MGST2	microsomal glutathione S-transferase 2				Q8NA47	CCDC63	coiled-coil domain containing 63
A6NH00	OR2T8	olfactory receptor family 2 subfamily T member 8	Q9Y5E7	PCDHB2	protocadherin beta 2	Q9H2C1	LHX5	LIM homeobox 5	Q9H2B4	SLC26A1	solute carrier family 26 member 1	Q9H2B4	SLC26A1	solute carrier family 26 member 1				Q9NVT9	ARMC1	armadillo repeat containing 1
O95372	LYPLA2	lysophospholipase 2	A8K0B5	ZBTB8OS	zinc finger and BTB domain containing 8 opposite strand	Q7Z3K6	MIER3	MIER family member 3	P55087	AQP4	aquaporin 4	P55087	AQP4	aquaporin 4				Q16473	TNXA	tenascin XA (pseudogene)
Q5UAW9	GPR157	G protein-coupled receptor 157	Q6NSJ2	PHLDB3	pleckstrin homology like domain family B member 3	Q9NYL9	TMOD3	tropomodulin 3	Q12931	TRAP1	TNF receptor associated protein 1	Q12931	TRAP1	TNF receptor associated protein 1				Q9UPV9	TRAK1	trafficking kinesin protein 1
Q9BYC2	OXCT2	3-oxoacid CoA-transferase 2	P11177	PDHB	pyruvate dehydrogenase E1 subunit beta	Q96QV6	H2AC1	H2A clustered histone 1	Q9NUT2	ABCB8	ATP binding cassette subfamily B member 8	Q9NUT2	ABCB8	ATP binding cassette subfamily B member 8				P18074	ERCC2	ERCC excision repair 2, TFIIH core complex helicase subunit
Q8NGE7	OR9K2	olfactory receptor family 9 subfamily K member 2	Q5H9R4	ARMCX4	armadillo repeat containing X-linked 4	Q9BSK1	ZNF577	zinc finger protein 577	Q9UJJ7	RPUSD1	RNA pseudouridine synthase domain containing 1	Q9UJJ7	RPUSD1	RNA pseudouridine synthase domain containing 1				Q9NY93	DDX56	DEAD-box helicase 56
O43194	GPR39	G protein-coupled receptor 39	Q92900	UPF1	UPF1 RNA helicase and ATPase	Q86XE0	SNX32	sorting nexin 32	P48201	ATP5MC3	ATP synthase membrane subunit c locus 3	P48201	ATP5MC3	ATP synthase membrane subunit c locus 3				P78368	CSNK1G2	casein kinase 1 gamma 2
Q9UIF3	TEKT2	tektin 2	O15287	FANCG	FA complementation group G	P20936	RASA1	RAS p21 protein activator 1	P52895	AKR1C2	aldo-keto reductase family 1 member C2	P52895	AKR1C2	aldo-keto reductase family 1 member C2				Q9Y5E9	PCDHB14	protocadherin beta 14
A0A1W2PQJ5	SSU72P3	RNA polymerase II subunit A C-terminal domain phosphatase SSU72 (CTD phosphatase SSU72) (EC 3.1.3.16)	P39019	RPS19	ribosomal protein S19	Q96N95	ZNF396	zinc finger protein 396	Q6UB28	METAP1D	methionyl aminopeptidase type 1D, mitochondrial	Q6UB28	METAP1D	methionyl aminopeptidase type 1D, mitochondrial				Q96HP4	OXNAD1	oxidoreductase NAD binding domain containing 1
O95352	ATG7	autophagy related 7	Q13601	KRR1	KRR1 small subunit processome component homolog	P25774	CTSS	cathepsin S	Q86VQ3	TXNDC2	thioredoxin domain containing 2	Q86VQ3	TXNDC2	thioredoxin domain containing 2				Q00577	PURA	purine rich element binding protein A
Q8NGQ4	OR10Q1	olfactory receptor family 10 subfamily Q member 1	P40189	IL6ST	interleukin 6 cytokine family signal transducer	Q7L1V2	MON1B	MON1 homolog B, secretory trafficking associated	Q7Z6W7	DNAJB7	DnaJ heat shock protein family (Hsp40) member B7	Q7Z6W7	DNAJB7	DnaJ heat shock protein family (Hsp40) member B7				Q9UN81	L1RE1	LINE-1 retrotransposable element ORF1 protein (L1ORF1p) (LINE retrotransposable element 1) (LINE1 retrotransposable element 1)
Q9Y534	CSDC2	cold shock domain containing C2	Q9HBM6	TAF9B	TATA-box binding protein associated factor 9b	P49918	CDKN1C	cyclin dependent kinase inhibitor 1C	Q9UKK9	NUDT5	nudix hydrolase 5	Q9UKK9	NUDT5	nudix hydrolase 5				A8MWD9	SNRPGP15	small nuclear ribonucleoprotein polypeptide G pseudogene 15
P51685	CCR8	C-C motif chemokine receptor 8	Q9NRF9	POLE3	DNA polymerase epsilon 3, accessory subunit	Q13045	FLII	FLII actin remodeling protein	Q9BUT1	BDH2	3-hydroxybutyrate dehydrogenase 2	Q9BUT1	BDH2	3-hydroxybutyrate dehydrogenase 2				Q5I0X7	TTC32	tetratricopeptide repeat domain 32
Q8N7A1	KLHDC1	kelch domain containing 1	Q9NTU7	CBLN4	cerebellin 4 precursor	O94955	RHOBTB3	Rho related BTB domain containing 3	Q9NTX5	ECHDC1	ethylmalonyl-CoA decarboxylase 1	Q9NTX5	ECHDC1	ethylmalonyl-CoA decarboxylase 1				Q6P9F5	TRIM40	tripartite motif containing 40
Q8NGS5	OR13C4	olfactory receptor family 13 subfamily C member 4	Q9H944	MED20	mediator complex subunit 20	O60292	SIPA1L3	signal induced proliferation associated 1 like 3	Q00266	MAT1A	methionine adenosyltransferase 1A	Q00266	MAT1A	methionine adenosyltransferase 1A				O76014	KRT37	keratin 37
O60543	CIDEA	cell death inducing DFFA like effector a	Q9NXH9	TRMT1	tRNA methyltransferase 1	P01009	SERPINA1	serpin family A member 1	P11168	SLC2A2	solute carrier family 2 member 2	P11168	SLC2A2	solute carrier family 2 member 2				Q8N699	MYCT1	MYC target 1
Q9Y5Z4	HEBP2	heme binding protein 2	Q05315	CLC	Charcot-Leyden crystal galectin	P22670	RFX1	regulatory factor X1	P30301	MIP	major intrinsic protein of lens fiber	P30301	MIP	major intrinsic protein of lens fiber				A8MT33	SYCE1L	synaptonemal complex central element protein 1 like
Q9UBK8	MTRR	5-methyltetrahydrofolate-homocysteine methyltransferase reductase	Q8IYF1	ELOA2	elongin A2	Q9NZL3	ZNF224	zinc finger protein 224	Q8N142	ADSS1	adenylosuccinate synthase 1	Q8N142	ADSS1	adenylosuccinate synthase 1				Q5VVM6	CCDC30	coiled-coil domain containing 30
Q9NXN4	GDAP2	ganglioside induced differentiation associated protein 2	O43747	AP1G1	adaptor related protein complex 1 subunit gamma 1	Q9BWV3	CDADC1	cytidine and dCMP deaminase domain containing 1	Q9H6R0	DHX33	DEAH-box helicase 33	Q9H6R0	DHX33	DEAH-box helicase 33				Q9NQG5	RPRD1B	regulation of nuclear pre-mRNA domain containing 1B
A6PVS8	LRRIQ3	leucine rich repeats and IQ motif containing 3	Q9Y561	LRP12	LDL receptor related protein 12	Q86YD1	PTOV1	PTOV1 extended AT-hook containing adaptor protein	P36959	GMPR	guanosine monophosphate reductase	P36959	GMPR	guanosine monophosphate reductase				Q9UQB9	AURKC	aurora kinase C
Q8NH81	OR10G6	olfactory receptor family 10 subfamily G member 6	Q15628	TRADD	TNFRSF1A associated via death domain	B0YJ81	HACD1	3-hydroxyacyl-CoA dehydratase 1	Q9Y4W6	AFG3L2	AFG3 like matrix AAA peptidase subunit 2	Q9Y4W6	AFG3L2	AFG3 like matrix AAA peptidase subunit 2				Q9Y5S1	TRPV2	transient receptor potential cation channel subfamily V member 2
P35408	PTGER4	prostaglandin E receptor 4	Q969Q0	RPL36AL	ribosomal protein L36a like	Q86TB9	PATL1	PAT1 homolog 1, processing body mRNA decay factor	Q7RTY0	SLC16A13	solute carrier family 16 member 13	Q7RTY0	SLC16A13	solute carrier family 16 member 13				Q6P4F1	FUT10	fucosyltransferase 10
Q9Y2H9	MAST1	microtubule associated serine/threonine kinase 1	Q9UN75	PCDHA12	protocadherin alpha 12	Q6ZT52	FAM43B	family with sequence similarity 43 member B	O76031	CLPX	caseinolytic mitochondrial matrix peptidase chaperone subunit X	O76031	CLPX	caseinolytic mitochondrial matrix peptidase chaperone subunit X				Q8N6R0	METTL13	methyltransferase 13, eEF1A N-terminus and K55
Q96QE5	TEFM	transcription elongation factor, mitochondrial	P49207	RPL34	ribosomal protein L34	Q9UGL1	KDM5B	lysine demethylase 5B	Q8TAD4	SLC30A5	solute carrier family 30 member 5	Q8TAD4	SLC30A5	solute carrier family 30 member 5				Q9BRL6	SRSF8	serine and arginine rich splicing factor 8
Q5T442	GJC2	gap junction protein gamma 2	Q15631	TSN	translin	A0A075B7B8	IGHV3OR16-12	immunoglobulin heavy variable 3/OR16-12 (non-functional)	Q16740	CLPP	caseinolytic mitochondrial matrix peptidase proteolytic subunit	Q16740	CLPP	caseinolytic mitochondrial matrix peptidase proteolytic subunit				Q9UIC8	LCMT1	leucine carboxyl methyltransferase 1
P30046	DDT	D-dopachrome tautomerase	Q9NV31	IMP3	IMP U3 small nucleolar ribonucleoprotein 3	P11473	VDR	vitamin D receptor	Q6PI48	DARS2	aspartyl-tRNA synthetase 2, mitochondrial	Q6PI48	DARS2	aspartyl-tRNA synthetase 2, mitochondrial				Q86SE8	NPM2	nucleophosmin/nucleoplasmin 2
A0A0A0MS15	IGHV3-49	immunoglobulin heavy variable 3-49	Q96CP7	TLCD1	TLC domain containing 1	Q9NYY1	IL20	interleukin 20	Q8TED1	GPX8	glutathione peroxidase 8 (putative)	Q8TED1	GPX8	glutathione peroxidase 8 (putative)				Q8IYE1	CCDC13	coiled-coil domain containing 13
Q5SRE7	PHYHD1	phytanoyl-CoA dioxygenase domain containing 1	Q9BQI5	SGIP1	SH3GL interacting endocytic adaptor 1	P82987	ADAMTSL3	ADAMTS like 3	O43315	AQP9	aquaporin 9	O43315	AQP9	aquaporin 9				Q9HC77	CENPJ	centromere protein J
A6NJZ3	OR6C65	olfactory receptor family 6 subfamily C member 65	Q9C030	TRIM6	tripartite motif containing 6	P20073	ANXA7	annexin A7	Q96TA2	YME1L1	YME1 like 1 ATPase	Q96TA2	YME1L1	YME1 like 1 ATPase				Q9C0C7	AMBRA1	autophagy and beclin 1 regulator 1
Q8IYK2	CCDC105	Coiled-coil domain-containing protein 105	P57078	RIPK4	receptor interacting serine/threonine kinase 4	O96000	NDUFB10	NADH:ubiquinone oxidoreductase subunit B10	Q9BTZ2	DHRS4	dehydrogenase/reductase 4	Q9BTZ2	DHRS4	dehydrogenase/reductase 4				O43283	MAP3K13	mitogen-activated protein kinase kinase kinase 13
P33121	ACSL1	acyl-CoA synthetase long chain family member 1	P05162	LGALS2	galectin 2	Q14C86	GAPVD1	GTPase activating protein and VPS9 domains 1	Q6IN84	MRM1	mitochondrial rRNA methyltransferase 1	Q6IN84	MRM1	mitochondrial rRNA methyltransferase 1				P21281	ATP6V1B2	ATPase H+ transporting V1 subunit B2
Q9H1C0	LPAR5	lysophosphatidic acid receptor 5	P49770	EIF2B2	eukaryotic translation initiation factor 2B subunit beta	Q9UKP5	ADAMTS6	ADAM metallopeptidase with thrombospondin type 1 motif 6	Q86SG2	ANKRD23	ankyrin repeat domain 23	Q86SG2	ANKRD23	ankyrin repeat domain 23				O14717	TRDMT1	tRNA aspartic acid methyltransferase 1
Q9Y6C5	PTCH2	patched 2	Q9C026	TRIM9	tripartite motif containing 9	P08519	LPA	lipoprotein(a)	Q9H0R4	HDHD2	haloacid dehalogenase like hydrolase domain containing 2	Q9H0R4	HDHD2	haloacid dehalogenase like hydrolase domain containing 2				Q96QS3	ARX	aristaless related homeobox
Q53G59	KLHL12	kelch like family member 12	A8MVZ5	BTNL10P	butyrophilin like 10, pseudogene	Q5JU00	TCTE1	t-complex-associated-testis-expressed 1	P11217	PYGM	glycogen phosphorylase, muscle associated	P11217	PYGM	glycogen phosphorylase, muscle associated				Q8N0V4	LGI2	leucine rich repeat LGI family member 2
A0A0B4J2E0	TRBV12-4	T cell receptor beta variable 12-4	Q9Y2X3	NOP58	NOP58 ribonucleoprotein	Q99963	SH3GL3	SH3 domain containing GRB2 like 3, endophilin A3	P22352	GPX3	glutathione peroxidase 3	P22352	GPX3	glutathione peroxidase 3				Q9UQ16	DNM3	dynamin 3
Q96G91	P2RY11	purinergic receptor P2Y11	Q8TDN6	BRIX1	biogenesis of ribosomes BRX1	Q8IVP9	ZNF547	zinc finger protein 547	Q9Y303	AMDHD2	amidohydrolase domain containing 2	Q9Y303	AMDHD2	amidohydrolase domain containing 2				Q9H7E9	C8orf33	chromosome 8 open reading frame 33
Q5RKV6	EXOSC6	exosome component 6	O00478	BTN3A3	butyrophilin subfamily 3 member A3	Q96GP6	SCARF2	scavenger receptor class F member 2	P31937	HIBADH	3-hydroxyisobutyrate dehydrogenase	P31937	HIBADH	3-hydroxyisobutyrate dehydrogenase				Q9UMS6	SYNPO2	synaptopodin 2
P48163	ME1	malic enzyme 1	Q6P1S2	C3orf33	chromosome 3 open reading frame 33	Q92496	CFHR4	complement factor H related 4	A2RTX5	TARS3	threonyl-tRNA synthetase 3	A2RTX5	TARS3	threonyl-tRNA synthetase 3				Q9P1A6	DLGAP2	DLG associated protein 2
Q9Y619	SLC25A15	solute carrier family 25 member 15	P51813	BMX	BMX non-receptor tyrosine kinase	Q96HA8	NTAQ1	N-terminal glutamine amidase 1	O75884	RBBP9	RB binding protein 9, serine hydrolase	O75884	RBBP9	RB binding protein 9, serine hydrolase				P0DP08	IGHV4-38-2	immunoglobulin heavy variable 4-38-2
Q9BV57	ADI1	acireductone dioxygenase 1	A6PVC2	TTLL8	tubulin tyrosine ligase like 8	Q06141	REG3A	regenerating family member 3 alpha	P23515	OMG	oligodendrocyte myelin glycoprotein	P23515	OMG	oligodendrocyte myelin glycoprotein				Q6P5R6	RPL22L1	ribosomal protein L22 like 1
A6NIE9	PRSS29P	serine protease 29, pseudogene	Q8WWF5	ZNRF4	zinc and ring finger 4	P20142	PGC	progastricsin	Q9BYW1	SLC2A11	solute carrier family 2 member 11	Q9BYW1	SLC2A11	solute carrier family 2 member 11				Q9NXJ5	PGPEP1	pyroglutamyl-peptidase I
Q8TBC4	UBA3	ubiquitin like modifier activating enzyme 3	P56282	POLE2	DNA polymerase epsilon 2, accessory subunit	Q9Y3C5	RNF11	ring finger protein 11	A6NLP5	TTC36	tetratricopeptide repeat domain 36	A6NLP5	TTC36	tetratricopeptide repeat domain 36				Q14680	MELK	maternal embryonic leucine zipper kinase
P48788	TNNI2	troponin I2, fast skeletal type	Q7Z2T5	TRMT1L	tRNA methyltransferase 1 like	Q8N393	ZNF786	zinc finger protein 786	P54819	AK2	adenylate kinase 2	P54819	AK2	adenylate kinase 2				P29558	RBMS1	RNA binding motif single stranded interacting protein 1
P32247	BRS3	bombesin receptor subtype 3	Q9NXI6	RNF186	ring finger protein 186	Q9H832	UBE2Z	ubiquitin conjugating enzyme E2 Z	P23378	GLDC	glycine decarboxylase	P23378	GLDC	glycine decarboxylase				P0DM63	NPIPA8	nuclear pore complex interacting protein family member A8
Q8NGQ6	OR9I1	olfactory receptor family 9 subfamily I member 1	Q9H159	CDH19	cadherin 19	Q9P2Z0	THAP10	THAP domain containing 10	P31153	MAT2A	methionine adenosyltransferase 2A	P31153	MAT2A	methionine adenosyltransferase 2A				Q13148	TARDBP	TAR DNA binding protein
Q8NH37	OR4C3	olfactory receptor family 4 subfamily C member 3	Q86V20	SHLD2	shieldin complex subunit 2	Q587J7	TDRD12	tudor domain containing 12	Q6PKH6	DHRS4L2	dehydrogenase/reductase 4 like 2	Q6PKH6	DHRS4L2	dehydrogenase/reductase 4 like 2				Q96JN2	CCDC136	coiled-coil domain containing 136
Q9NPC8	SIX2	SIX homeobox 2	Q9UNX3	RPL26L1	ribosomal protein L26 like 1	O00220	TNFRSF10A	TNF receptor superfamily member 10a	P35670	ATP7B	ATPase copper transporting beta	P35670	ATP7B	ATPase copper transporting beta				Q6P597	KLC3	kinesin light chain 3
Q13606	OR5I1	olfactory receptor family 5 subfamily I member 1	Q8WVJ9	TWIST2	twist family bHLH transcription factor 2	Q14264	ERV3-1	endogenous retrovirus group 3 member 1, envelope	Q99798	ACO2	aconitase 2	Q99798	ACO2	aconitase 2				P10398	ARAF	A-Raf proto-oncogene, serine/threonine kinase
Q6PI77	GPRASP3	G protein-coupled receptor associated sorting protein family member 3	Q9Y5E2	PCDHB7	protocadherin beta 7	Q9Y2L5	TRAPPC8	trafficking protein particle complex subunit 8	O43766	LIAS	lipoic acid synthetase	O43766	LIAS	lipoic acid synthetase				O95644	NFATC1	nuclear factor of activated T cells 1
O60755	GALR3	galanin receptor 3	Q9H9Y2	RPF1	ribosome production factor 1 homolog	Q7Z3C6	ATG9A	autophagy related 9A	Q496J9	SV2C	synaptic vesicle glycoprotein 2C	Q496J9	SV2C	synaptic vesicle glycoprotein 2C				P63261	ACTG1	actin gamma 1
Q9H210	OR2D2	olfactory receptor family 2 subfamily D member 2	Q53GL0	PLEKHO1	pleckstrin homology domain containing O1	P04180	LCAT	lecithin-cholesterol acyltransferase	C9JRZ8	AKR1B15	aldo-keto reductase family 1 member B15	C9JRZ8	AKR1B15	aldo-keto reductase family 1 member B15				Q7L014	DDX46	DEAD-box helicase 46
Q7Z7B1	PIGW	phosphatidylinositol glycan anchor biosynthesis class W	A0A1W2PPL8	TAF11L14	TATA-box binding protein associated factor 11 like 14	Q8TCX5	RHPN1	rhophilin Rho GTPase binding protein 1	Q9H3K6	BOLA2	bolA family member 2	Q9H3K6	BOLA2	bolA family member 2				Q96A99	PTX4	pentraxin 4
Q8NBI2	CYB561A3	cytochrome b561 family member A3	Q9NRJ5	PAPOLB	poly(A) polymerase beta	O95497	VNN1	vanin 1	P11021	HSPA5	heat shock protein family A (Hsp70) member 5	P11021	HSPA5	heat shock protein family A (Hsp70) member 5				Q8IVL1	NAV2	neuron navigator 2
P35414	APLNR	apelin receptor	P61296	HAND2	heart and neural crest derivatives expressed 2	P32942	ICAM3	intercellular adhesion molecule 3	P51854	TKTL1	transketolase like 1	P51854	TKTL1	transketolase like 1				P17482	HOXB9	homeobox B9
A0A2R8YEV3	OR2A42	olfactory receptor family 2 subfamily A member 42	Q9Y5I4	PCDHAC2	protocadherin alpha subfamily C, 2	Q8N755	SLC66A3	solute carrier family 66 member 3	Q9H974	QTRT2	queuine tRNA-ribosyltransferase accessory subunit 2	Q9H974	QTRT2	queuine tRNA-ribosyltransferase accessory subunit 2				O95477	ABCA1	ATP binding cassette subfamily A member 1
A6NCL7	ANKRD33B	ankyrin repeat domain 33B	Q5XPI4	RNF123	ring finger protein 123	Q3KP31	ZNF791	zinc finger protein 791	P35754	GLRX	glutaredoxin	P35754	GLRX	glutaredoxin				Q9UFE4	CCDC39	coiled-coil domain containing 39
Q5JWF8	ACTL10	actin like 10	Q9Y296	TRAPPC4	trafficking protein particle complex subunit 4	Q7RTM1	OTOP1	otopetrin 1	P15121	AKR1B1	aldo-keto reductase family 1 member B	P15121	AKR1B1	aldo-keto reductase family 1 member B				P78330	PSPH	phosphoserine phosphatase
P01780	IGHV3-7	immunoglobulin heavy variable 3-7	A0A1W2PR64	TAF11L9	TATA-box binding protein associated factor 11 like 9	Q9BQI0	AIF1L	allograft inflammatory factor 1 like	P14550	AKR1A1	aldo-keto reductase family 1 member A1	P14550	AKR1A1	aldo-keto reductase family 1 member A1				Q53HC9	EIPR1	EARP complex and GARP complex interacting protein 1
Q9NQN1	OR2S2	olfactory receptor family 2 subfamily S member 2	Q12913	PTPRJ	protein tyrosine phosphatase receptor type J	P02765	AHSG	alpha 2-HS glycoprotein	O95154	AKR7A3	aldo-keto reductase family 7 member A3	O95154	AKR7A3	aldo-keto reductase family 7 member A3				Q99436	PSMB7	proteasome 20S subunit beta 7
Q8TEZ7	PAQR8	progestin and adipoQ receptor family member 8	Q9BZE4	GTPBP4	GTP binding protein 4	Q12765	SCRN1	secernin 1	P0DPI2	GATD3	glutamine amidotransferase class 1 domain containing 3	P0DPI2	GATD3	glutamine amidotransferase class 1 domain containing 3				Q9Y5Z9	UBIAD1	UbiA prenyltransferase domain containing 1
O95573	ACSL3	acyl-CoA synthetase long chain family member 3	Q9UI10	EIF2B4	eukaryotic translation initiation factor 2B subunit delta	Q15654	TRIP6	thyroid hormone receptor interactor 6	P11216	PYGB	glycogen phosphorylase B	P11216	PYGB	glycogen phosphorylase B				Q14847	LASP1	LIM and SH3 protein 1
P25116	F2R	coagulation factor II thrombin receptor	P24844	MYL9	myosin light chain 9	Q13361	MFAP5	microfibril associated protein 5	P05023	ATP1A1	ATPase Na+/K+ transporting subunit alpha 1	P05023	ATP1A1	ATPase Na+/K+ transporting subunit alpha 1				Q8IV42	PSTK	phosphoseryl-tRNA kinase
Q12906	ILF3	interleukin enhancer binding factor 3	P62487	POLR2G	RNA polymerase II subunit G	Q8NCH0	CHST14	carbohydrate sulfotransferase 14	O94903	PLPBP	pyridoxal phosphate binding protein	O94903	PLPBP	pyridoxal phosphate binding protein				A8MZ36	EVPLL	envoplakin like
P20061	TCN1	transcobalamin 1	Q9NRF2	SH2B1	SH2B adaptor protein 1	P54284	CACNB3	calcium voltage-gated channel auxiliary subunit beta 3	Q86WA9	SLC26A11	solute carrier family 26 member 11	Q86WA9	SLC26A11	solute carrier family 26 member 11				O14974	PPP1R12A	protein phosphatase 1 regulatory subunit 12A
P43628	KIR2DL3	killer cell immunoglobulin like receptor, two Ig domains and long cytoplasmic tail 3	Q7RTT3	SSX9P	SSX family member 9, pseudogene	Q969T4	UBE2E3	ubiquitin conjugating enzyme E2 E3	O14880	MGST3	microsomal glutathione S-transferase 3	O14880	MGST3	microsomal glutathione S-transferase 3				Q9Y615	ACTL7A	actin like 7A
Q6SZW1	SARM1	sterile alpha and TIR motif containing 1	Q12955	ANK3	ankyrin 3	Q9H7D0	DOCK5	dedicator of cytokinesis 5	Q9P2U7	SLC17A7	solute carrier family 17 member 7	Q9P2U7	SLC17A7	solute carrier family 17 member 7				Q9Y644	RFNG	RFNG O-fucosylpeptide 3-beta-N-acetylglucosaminyltransferase
Q8NGL0	OR5L2	olfactory receptor family 5 subfamily L member 2	Q9H5X1	CIAO2A	cytosolic iron-sulfur assembly component 2A	Q96SA4	SERINC2	serine incorporator 2	Q8NHP1	AKR7L	aldo-keto reductase family 7 like (gene/pseudogene)	Q8NHP1	AKR7L	aldo-keto reductase family 7 like (gene/pseudogene)				Q6PII3	CCDC174	coiled-coil domain containing 174
Q7RTY5	PRSS48	serine protease 48	Q16667	CDKN3	cyclin dependent kinase inhibitor 3	Q92932	PTPRN2	protein tyrosine phosphatase receptor type N2	Q9P2U8	SLC17A6	solute carrier family 17 member 6	Q9P2U8	SLC17A6	solute carrier family 17 member 6				Q96AA8	JAKMIP2	janus kinase and microtubule interacting protein 2
O15540	FABP7	fatty acid binding protein 7	Q9UJA5	TRMT6	tRNA methyltransferase 6 non-catalytic subunit	Q58A44	PCOTH	prostate and testis expressed opposite C1QTNF9B and MIPEP	Q9NWZ5	UCKL1	uridine-cytidine kinase 1 like 1	Q9NWZ5	UCKL1	uridine-cytidine kinase 1 like 1				P27815	PDE4A	phosphodiesterase 4A
Q8NH60	OR52J3	olfactory receptor family 52 subfamily J member 3	Q9BV47	DUSP26	dual specificity phosphatase 26	Q9P2K1	CC2D2A	coiled-coil and C2 domain containing 2A	Q6UWP2	DHRS11	dehydrogenase/reductase 11	Q6UWP2	DHRS11	dehydrogenase/reductase 11				P60880	SNAP25	synaptosome associated protein 25
Q96GR2	ACSBG1	acyl-CoA synthetase bubblegum family member 1	Q07092	COL16A1	collagen type XVI alpha 1 chain	Q02763	TEK	TEK receptor tyrosine kinase	Q8N490	PNKD	PNKD metallo-beta-lactamase domain containing	Q8N490	PNKD	PNKD metallo-beta-lactamase domain containing				Q8NDT2	RBM15B	RNA binding motif protein 15B
Q16853	AOC3	amine oxidase copper containing 3	Q9UJ37	ST6GALNAC2	ST6 N-acetylgalactosaminide alpha-2,6-sialyltransferase 2	Q92565	RAPGEF5	Rap guanine nucleotide exchange factor 5	Q96BW1	UPRT	uracil phosphoribosyltransferase homolog	Q96BW1	UPRT	uracil phosphoribosyltransferase homolog				Q96JK9	MAML3	mastermind like transcriptional coactivator 3
P47992	XCL1	X-C motif chemokine ligand 1	A2RU48	SMCO3	single-pass membrane protein with coiled-coil domains 3	Q6ZMV5	PPP4R3C	protein phosphatase 4 regulatory subunit 3C	Q92527	ANKRD7	ankyrin repeat domain 7	Q92527	ANKRD7	ankyrin repeat domain 7				P08240	SRPRA	SRP receptor subunit alpha
P19526	FUT1	fucosyltransferase 1 (H blood group)	P68431	H3C1	H3 clustered histone 1	Q9ULE0	WWC3	WWC family member 3	Q9UJA2	CRLS1	cardiolipin synthase 1	Q9UJA2	CRLS1	cardiolipin synthase 1				P51955	NEK2	NIMA related kinase 2
O95164	UBL3	ubiquitin like 3	Q9BRJ9	MESP1	mesoderm posterior bHLH transcription factor 1	O60337	MARCHF6	membrane associated ring-CH-type finger 6	P27708	CAD	carbamoyl-phosphate synthetase 2, aspartate transcarbamylase, and dihydroorotase	P27708	CAD	carbamoyl-phosphate synthetase 2, aspartate transcarbamylase, and dihydroorotase				P61916	NPC2	NPC intracellular cholesterol transporter 2
Q9UPE1	SRPK3	SRSF protein kinase 3	Q969S8	HDAC10	histone deacetylase 10	Q9P1Z9	CCDC180	coiled-coil domain containing 180	P27695	APEX1	apurinic/apyrimidinic endodeoxyribonuclease 1	P27695	APEX1	apurinic/apyrimidinic endodeoxyribonuclease 1				Q9UBJ2	ABCD2	ATP binding cassette subfamily D member 2
P59537	TAS2R43	taste 2 receptor member 43	P36894	BMPR1A	bone morphogenetic protein receptor type 1A	Q7M4L6	SHF	Src homology 2 domain containing F	Q8NDX2	SLC17A8	solute carrier family 17 member 8	Q8NDX2	SLC17A8	solute carrier family 17 member 8				Q8TED9	AFAP1L1	actin filament associated protein 1 like 1
P09341	CXCL1	C-X-C motif chemokine ligand 1	P50402	EMD	emerin	Q8N3I7	BBS5	Bardet-Biedl syndrome 5	P56545	CTBP2	C-terminal binding protein 2	P56545	CTBP2	C-terminal binding protein 2				Q4G0S7	CCDC152	coiled-coil domain containing 152
Q9Y253	POLH	DNA polymerase eta	Q9BZA8	PCDH11Y	protocadherin 11 Y-linked	Q92915	FGF14	fibroblast growth factor 14	P0DMV8	HSPA1A	heat shock protein family A (Hsp70) member 1A	P0DMV8	HSPA1A	heat shock protein family A (Hsp70) member 1A				Q9UJU5	FOXD3	forkhead box D3
Q8N1Q8	THEM5	thioesterase superfamily member 5	P0C0L4	C4A	complement C4A (Rodgers blood group)	Q9BRP1	PDCD2L	programmed cell death 2 like	Q96GJ1	TRMT2B	tRNA methyltransferase 2 homolog B	Q96GJ1	TRMT2B	tRNA methyltransferase 2 homolog B				A0A075B6U4	TRAV7	T cell receptor alpha variable 7
P07550	ADRB2	adrenoceptor beta 2	Q14165	MLEC	malectin	Q8IUW3	SPATA2L	spermatogenesis associated 2 like	Q9UK99	FBXO3	F-box protein 3	Q9UK99	FBXO3	F-box protein 3				Q8IZ41	RASEF	RAS and EF-hand domain containing
P78382	SLC35A1	solute carrier family 35 member A1	Q13516	OLIG2	oligodendrocyte transcription factor 2	Q9Y320	TMX2	thioredoxin related transmembrane protein 2	A7E2S9	ANKRD30BL	ankyrin repeat domain 30B like	A7E2S9	ANKRD30BL	ankyrin repeat domain 30B like				Q9UPV0	CEP164	centrosomal protein 164
Q8N8Q9	NIPA2	NIPA magnesium transporter 2	Q8WW59	SPRYD4	SPRY domain containing 4	Q96FN4	CPNE2	copine 2	P11142	HSPA8	heat shock protein family A (Hsp70) member 8	P11142	HSPA8	heat shock protein family A (Hsp70) member 8				Q6NXR0	IRGC	immunity related GTPase cinema
Q1L5Z9	LONRF2	LON peptidase N-terminal domain and ring finger 2	P84243	H3-3A	H3.3 histone A	Q8WYA6	CTNNBL1	catenin beta like 1	Q9NVS9	PNPO	pyridoxamine 5'-phosphate oxidase	Q9NVS9	PNPO	pyridoxamine 5'-phosphate oxidase				Q96NL6	SCLT1	sodium channel and clathrin linker 1
Q9UHD9	UBQLN2	ubiquilin 2	Q5TA45	INTS11	integrator complex subunit 11	Q96PB1	CASD1	CAS1 domain containing 1	P24666	ACP1	acid phosphatase 1	P24666	ACP1	acid phosphatase 1				Q16644	MAPKAPK3	MAPK activated protein kinase 3
Q13428	TCOF1	treacle ribosome biogenesis factor 1	Q6FI13	H2AC18	H2A clustered histone 18	P84022	SMAD3	SMAD family member 3	Q9BY41	HDAC8	histone deacetylase 8							P32519	ELF1	E74 like ETS transcription factor 1
P25685	DNAJB1	DnaJ heat shock protein family (Hsp40) member B1	Q6ZWI9	RFPL4B	ret finger protein like 4B	P35125	USP6	ubiquitin specific peptidase 6	P20226	TBP	TATA-box binding protein							P07992	ERCC1	ERCC excision repair 1, endonuclease non-catalytic subunit
Q6W5P4	NPSR1	neuropeptide S receptor 1	Q9NWS8	RMND1	required for meiotic nuclear division 1 homolog	P49771	FLT3LG	fms related receptor tyrosine kinase 3 ligand	Q8TAM1	BBS10	Bardet-Biedl syndrome 10							Q8TBE1	CNIH3	cornichon family AMPA receptor auxiliary protein 3
Q92903	CDS1	CDP-diacylglycerol synthase 1	Q9BY50	SEC11C	SEC11 homolog C, signal peptidase complex subunit	Q6IPX1	TBC1D3C	TBC1 domain family member 3C	Q8TF09	DYNLRB2	dynein light chain roadblock-type 2							P01764	IGHV3-23	immunoglobulin heavy variable 3-23
Q8NHB7	OR5K1	olfactory receptor family 5 subfamily K member 1	Q7Z6M3	MILR1	mast cell immunoglobulin like receptor 1	Q9Y3A4	RRP7A	ribosomal RNA processing 7 homolog A	Q92526	CCT6B	chaperonin containing TCP1 subunit 6B							P57077	MAP3K7CL	MAP3K7 C-terminal like
A6NL26	OR5B21	olfactory receptor family 5 subfamily B member 21	P0CL83	STAG3L1	STAG3 cohesin complex component like 1 (pseudogene)	Q15013	MAD2L1BP	MAD2L1 binding protein	P62917	RPL8	ribosomal protein L8							Q5T6J7	IDNK	IDNK gluconokinase
H0UI37	TSTD3	thiosulfate sulfurtransferase like domain containing 3	Q8TEW6	DOK4	docking protein 4	Q99594	TEAD3	TEA domain transcription factor 3	Q8NHY5	HUS1B	HUS1 checkpoint clamp component B							P02489	CRYAA	crystallin alpha A
O95630	STAMBP	STAM binding protein	P46777	RPL5	ribosomal protein L5	O75467	ZNF324	zinc finger protein 324	P49257	LMAN1	lectin, mannose binding 1							A0A087WSY6	IGKV3D-15	immunoglobulin kappa variable 3D-15
P46092	CCR10	C-C motif chemokine receptor 10	Q9Y5E5	PCDHB4	protocadherin beta 4	P61088	UBE2N	ubiquitin conjugating enzyme E2 N	P08865	RPSA	ribosomal protein SA							O00442	RTCA	RNA 3'-terminal phosphate cyclase
Q8N144	GJD3	gap junction protein delta 3	P05388	RPLP0	ribosomal protein lateral stalk subunit P0	Q9BYZ8	REG4	regenerating family member 4	P55039	DRG2	developmentally regulated GTP binding protein 2							Q17RS7	GEN1	GEN1 Holliday junction 5' flap endonuclease
Q9HC52	CBX8	chromobox 8	P61313	RPL15	ribosomal protein L15	Q9NYG5	ANAPC11	anaphase promoting complex subunit 11	Q6IS14	EIF5AL1	eukaryotic translation initiation factor 5A like 1							Q92698	RAD54L	RAD54 like
Q86WK6	AMIGO1	adhesion molecule with Ig like domain 1	Q9HBG4	ATP6V0A4	ATPase H+ transporting V0 subunit a4	Q7Z5Y6	BMP8A	bone morphogenetic protein 8a	Q6DRA6	H2BC19P	H2B clustered histone 19, pseudogene							P04075	ALDOA	aldolase, fructose-bisphosphate A
P31025	LCN1	lipocalin 1	Q9NUS5	AP5S1	adaptor related protein complex 5 subunit sigma 1	O75602	SPAG6	sperm associated antigen 6	Q8TAA3	PSMA8	proteasome 20S subunit alpha 8							Q6UX06	OLFM4	olfactomedin 4
Q9Y463	DYRK1B	dual specificity tyrosine phosphorylation regulated kinase 1B	Q9BZG8	DPH1	diphthamide biosynthesis 1	P52429	DGKE	diacylglycerol kinase epsilon	Q9Y324	FCF1	FCF1 rRNA-processing protein							Q8IXL9	IQCF2	IQ motif containing F2
Q13094	LCP2	lymphocyte cytosolic protein 2	Q6PJP8	DCLRE1A	DNA cross-link repair 1A	O94832	MYO1D	myosin ID	P56524	HDAC4	histone deacetylase 4							Q9UKG4	SLC13A4	solute carrier family 13 member 4
Q460N5	PARP14	poly(ADP-ribose) polymerase family member 14	Q7Z2G1	H2BW1	H2B.W histone 1	P02790	HPX	hemopexin	P62266	RPS23	ribosomal protein S23							Q9C056	NKX6-2	NK6 homeobox 2
P36269	GGT5	gamma-glutamyltransferase 5	Q9Y221	NIP7	nucleolar pre-rRNA processing protein NIP7	Q6V702	CFAP299	cilia and flagella associated protein 299	P40227	CCT6A	chaperonin containing TCP1 subunit 6A							O75309	CDH16	cadherin 16
Q8N6G5	CSGALNACT2	chondroitin sulfate N-acetylgalactosaminyltransferase 2	Q8ND30	PPFIBP2	PPFIA binding protein 2	Q6ZMZ0	RNF19B	ring finger protein 19B	P50991	CCT4	chaperonin containing TCP1 subunit 4							P0C7M4	RHOXF2B	Rhox homeobox family member 2B
Q86XS8	RNF130	ring finger protein 130	Q9H2S5	RNF39	ring finger protein 39	Q96IR7	HPDL	4-hydroxyphenylpyruvate dioxygenase like	Q9NP97	DYNLRB1	dynein light chain roadblock-type 1							Q01538	MYT1	myelin transcription factor 1
Q96RA2	OR7D2	olfactory receptor family 7 subfamily D member 2	Q9Y5J5	PHLDA3	pleckstrin homology like domain family A member 3	Q9ULV8	CBLC	Cbl proto-oncogene C	O60921	HUS1	HUS1 checkpoint clamp component							Q9Y5J7	TIMM9	translocase of inner mitochondrial membrane 9
J3QTR3	RPS27A	ribosomal protein S27a	P56537	EIF6	eukaryotic translation initiation factor 6	O43676	NDUFB3	NADH:ubiquinone oxidoreductase subunit B3	Q9GZM3	POLR2J2	RNA polymerase II subunit J2							Q562F6	SGO2	shugoshin 2
Q8WZ82	OVCA2	OVCA2 serine hydrolase domain containing	P49450	CENPA	centromere protein A	P04054	PLA2G1B	phospholipase A2 group IB	P46597	ASMT	acetylserotonin O-methyltransferase							Q27J81	INF2	inverted formin 2
Q9HDC5	JPH1	junctophilin 1	Q9Y5G9	PCDHGA4	protocadherin gamma subfamily A, 4	P51826	AFF3	ALF transcription elongation factor 3	Q9Y2Y1	POLR3K	RNA polymerase III subunit K							O14548	COX7A2L	cytochrome c oxidase subunit 7A2 like
Q13177	PAK2	p21 (RAC1) activated kinase 2	Q86YA3	ZGRF1	zinc finger GRF-type containing 1	Q2M385	MPEG1	macrophage expressed 1	P49368	CCT3	chaperonin containing TCP1 subunit 3							P57057	SLC37A1	solute carrier family 37 member 1
A0A576	TRBV3-1	T cell receptor beta variable 3-1	P23435	CBLN1	cerebellin 1 precursor	Q8WWZ3	EDARADD	EDAR associated via death domain	P22087	FBL	fibrillarin							Q00610	CLTC	clathrin heavy chain
P0DTE1	IGHV3-38-3	immunoglobulin heavy variable 3-38-3 (non-functional)	Q14232	EIF2B1	eukaryotic translation initiation factor 2B subunit alpha	A6NNY8	USP27X	ubiquitin specific peptidase 27 X-linked	P61221	ABCE1	ATP binding cassette subfamily E member 1							Q9BQY4	RHOXF2	Rhox homeobox family member 2
P51512	MMP16	matrix metallopeptidase 16	Q5EE01	CENPW	centromere protein W	Q86XF7	ZNF575	zinc finger protein 575	O94763	URI1	URI1 prefoldin like chaperone							A6QL64	ANKRD36	ankyrin repeat domain 36
Q3SYC2	MOGAT2	monoacylglycerol O-acyltransferase 2	Q99490	AGAP2	ArfGAP with GTPase domain, ankyrin repeat and PH domain 2	O95486	SEC24A	SEC24 homolog A, COPII coat complex component	Q9UKV0	HDAC9	histone deacetylase 9							Q12988	HSPB3	heat shock protein family B (small) member 3
Q9NR20	DYRK4	dual specificity tyrosine phosphorylation regulated kinase 4	Q92890	UFD1	ubiquitin recognition factor in ER associated degradation 1	P28068	HLA-DMB	major histocompatibility complex, class II, DM beta	O15379	HDAC3	histone deacetylase 3							Q7Z3B3	KANSL1	KAT8 regulatory NSL complex subunit 1
Q08211	DHX9	DExH-box helicase 9	O95751	LDOC1	LDOC1 regulator of NFKB signaling	O43556	SGCE	sarcoglycan epsilon	P05386	RPLP1	ribosomal protein lateral stalk subunit P1							O43325	LYRM1	LYR motif containing 1
O14684	PTGES	prostaglandin E synthase	P27482	CALML3	calmodulin like 3	Q9UEW3	MARCO	macrophage receptor with collagenous structure	Q6WBX8	RAD9B	RAD9 checkpoint clamp component B							P50222	MEOX2	mesenchyme homeobox 2
Q14697	GANAB	glucosidase II alpha subunit	P51398	DAP3	death associated protein 3	Q96JP5	ZFP91	ZFP91 zinc finger protein, atypical E3 ubiquitin ligase	Q9H9T3	ELP3	elongator acetyltransferase complex subunit 3							P14652	HOXB2	homeobox B2
P26440	IVD	isovaleryl-CoA dehydrogenase	Q8IUK8	CBLN2	cerebellin 2 precursor	Q86VV4	RANBP3L	RAN binding protein 3 like	P62841	RPS15	ribosomal protein S15							Q8IY63	AMOTL1	angiomotin like 1
P32241	VIPR1	vasoactive intestinal peptide receptor 1	P02743	APCS	amyloid P component, serum	O43320	FGF16	fibroblast growth factor 16	P25398	RPS12	ribosomal protein S12							Q9H6K4	OPA3	outer mitochondrial membrane lipid metabolism regulator OPA3
Q9Y2N7	HIF3A	hypoxia inducible factor 3 subunit alpha	Q3KNT7	NSUN5P1	NSUN5 pseudogene 1	Q9HCU0	CD248	CD248 molecule	P49736	MCM2	minichromosome maintenance complex component 2							Q9UN67	PCDHB10	protocadherin beta 10
A0AVF1	TTC26	Intraflagellar transport protein 56 (Tetratricopeptide repeat protein 26) (TPR repeat protein 26)	P24043	LAMA2	laminin subunit alpha 2	Q02985	CFHR3	complement factor H related 3	Q14566	MCM6	minichromosome maintenance complex component 6							Q6P1J9	CDC73	cell division cycle 73
Q14953	KIR2DS5	killer cell immunoglobulin like receptor, two Ig domains and short cytoplasmic tail 5	P49366	DHPS	deoxyhypusine synthase	Q9NQT8	KIF13B	kinesin family member 13B	Q9UQL6	HDAC5	histone deacetylase 5							Q5BVD1	TTMP	TPA-induced transmembrane protein
P23368	ME2	malic enzyme 2	Q6QHK4	FIGLA	folliculogenesis specific bHLH transcription factor	O14508	SOCS2	suppressor of cytokine signaling 2	P25205	MCM3	minichromosome maintenance complex component 3							Q56UN5	MAP3K19	mitogen-activated protein kinase kinase kinase 19
Q9H0R3	TMEM222	transmembrane protein 222	Q7Z7C8	TAF8	TATA-box binding protein associated factor 8	Q5SWX8	ODR4	odr-4 GPCR localization factor homolog	O60671	RAD1	RAD1 checkpoint DNA exonuclease							A2A3N6	PIPSL	PIP5K1A and PSMD4 like (pseudogene)
P51888	PRELP	proline and arginine rich end leucine rich repeat protein	Q9H1R2	DUSP15	dual specificity phosphatase 15	P56159	GFRA1	GDNF family receptor alpha 1	P25787	PSMA2	proteasome 20S subunit alpha 2							Q8NCC5	SLC37A3	solute carrier family 37 member 3
Q96RG2	PASK	PAS domain containing serine/threonine kinase	Q7Z739	YTHDF3	YTH N6-methyladenosine RNA binding protein F3	P50748	KNTC1	kinetochore associated 1	P63241	EIF5A	eukaryotic translation initiation factor 5A							Q4VNC0	ATP13A5	ATPase 13A5
Q969S0	SLC35B4	solute carrier family 35 member B4	P0DPK2	H3Y1	H3.Y histone 1	Q9BSQ5	CCM2	CCM2 scaffold protein	Q9H1A7	POLR2J3	RNA polymerase II subunit J3							P42025	ACTR1B	actin related protein 1B
Q9UFN0	NIPSNAP3A	nipsnap homolog 3A	P78345	RPP38	ribonuclease P/MRP subunit p38	Q02156	PRKCE	protein kinase C epsilon	P05387	RPLP2	ribosomal protein lateral stalk subunit P2							Q10589	BST2	bone marrow stromal cell antigen 2
Q10713	PMPCA	peptidase, mitochondrial processing subunit alpha	Q9BTM1	H2AJ	H2A.J histone	Q15464	SHB	SH2 domain containing adaptor protein B	Q96FX7	TRMT61A	tRNA methyltransferase 61A							Q8TDQ1	CD300LF	CD300 molecule like family member f
P62699	YPEL5	yippee like 5	P17931	LGALS3	galectin 3	Q5VWK5	IL23R	interleukin 23 receptor	Q8IVP5	FUNDC1	FUN14 domain containing 1							P33240	CSTF2	cleavage stimulation factor subunit 2
A0A1B0GXF2	TRBV7-2	T cell receptor beta variable 7-2	O95707	POP4	POP4 homolog, ribonuclease P/MRP subunit	O15234	CASC3	CASC3 exon junction complex subunit	Q9Y5K8	ATP6V1D	ATPase H+ transporting V1 subunit D							P02786	TFRC	transferrin receptor
Q14952	KIR2DS3	killer cell immunoglobulin like receptor, two Ig domains and short cytoplasmic tail 3	Q9Y487	ATP6V0A2	ATPase H+ transporting V0 subunit a2	Q13219	PAPPA	pappalysin 1	Q92979	EMG1	EMG1 N1-specific pseudouridine methyltransferase							Q9NRN9	METTL5	methyltransferase 5, N6-adenosine
Q6EEV6	SUMO4	small ubiquitin like modifier 4	O60942	RNGTT	RNA guanylyltransferase and 5'-phosphatase	A6NEV1	PRR23A	proline rich 23A	P12004	PCNA	proliferating cell nuclear antigen							O15525	MAFG	MAF bZIP transcription factor G
Q9BTY2	FUCA2	alpha-L-fucosidase 2	Q8WUJ3	CEMIP	cell migration inducing hyaluronidase 1	O14893	GEMIN2	gem nuclear organelle associated protein 2	Q9UKF6	CPSF3	cleavage and polyadenylation specific factor 3							Q96I25	RBM17	RNA binding motif protein 17
P0C7N8	OR9G9	olfactory receptor family 9 subfamily G member 9	Q14993	COL19A1	collagen type XIX alpha 1 chain	Q8IYT1	GARIN4	golgi associated RAB2 interactor family member 4	Q9HD40	SEPSECS	Sep (O-phosphoserine) tRNA:Sec (selenocysteine) tRNA synthase							A0A0A0MS14	IGHV1-45	immunoglobulin heavy variable 1-45
Q8IZY2	ABCA7	ATP binding cassette subfamily A member 7	Q8N7L0	FAM216B	family with sequence similarity 216 member B	O75469	NR1I2	nuclear receptor subfamily 1 group I member 2	Q9BSD7	NTPCR	nucleoside-triphosphatase, cancer-related							P0C7U0	ELFN1	extracellular leucine rich repeat and fibronectin type III domain containing 1
Q9GZK6	OR2J1	olfactory receptor family 2 subfamily J member 1	Q13296	SCGB2A2	secretoglobin family 2A member 2	Q01968	OCRL	OCRL inositol polyphosphate-5-phosphatase	P38606	ATP6V1A	ATPase H+ transporting V1 subunit A							P0C7P1	RBMY1D	RNA binding motif protein Y-linked family 1 member D
A6NM03	OR2AG2	olfactory receptor family 2 subfamily AG member 2	P59780	AP3S2	adaptor related protein complex 3 subunit sigma 2	P50238	CRIP1	cysteine rich protein 1	Q13547	HDAC1	histone deacetylase 1							Q86YN6	PPARGC1B	PPARG coactivator 1 beta
P21917	DRD4	dopamine receptor D4	Q9Y6J9	TAF6L	TATA-box binding protein associated factor 6 like	O60266	ADCY3	adenylate cyclase 3	O14818	PSMA7	proteasome 20S subunit alpha 7							O95969	SCGB1D2	secretoglobin family 1D member 2
A0A087X0K7	TRBV17	T cell receptor beta variable 17 (non-functional)	Q96PC3	AP1S3	adaptor related protein complex 1 subunit sigma 3	A6NJL1	ZSCAN5B	zinc finger and SCAN domain containing 5B	Q9H4I3	TRABD	TraB domain containing							B1ANS9	WDR64	WD repeat domain 64
Q7Z5A4	PRSS42P	serine protease 42, pseudogene	Q9UQP3	TNN	tenascin N	Q9NWT6	HIF1AN	hypoxia inducible factor 1 subunit alpha inhibitor	Q9H2P9	DPH5	diphthamide biosynthesis 5							O60504	SORBS3	sorbin and SH3 domain containing 3
Q6ZSC3	RBM43	RNA binding motif protein 43	Q9Y5F0	PCDHB13	protocadherin beta 13	Q7Z589	EMSY	EMSY transcriptional repressor, BRCA2 interacting	Q92769	HDAC2	histone deacetylase 2							P0C843	LINC00032	Putative uncharacterized protein encoded by LINC00032
P63136	ERVK-25	endogenous retrovirus group K member 25	Q9UN72	PCDHA7	protocadherin alpha 7	O60477	BRINP1	BMP/retinoic acid inducible neural specific 1	Q99832	CCT7	chaperonin containing TCP1 subunit 7							Q9BQ75	CMSS1	cms1 ribosomal small subunit homolog
O15467	CCL16	C-C motif chemokine ligand 16	O00182	LGALS9	galectin 9	Q06330	RBPJ	recombination signal binding protein for immunoglobulin kappa J region	P50990	CCT8	chaperonin containing TCP1 subunit 8							A0A0C4DH43	IGHV2-70D	immunoglobulin heavy variable 2-70D
Q8TEQ8	PIGO	phosphatidylinositol glycan anchor biosynthesis class O	P18858	LIG1	DNA ligase 1	P01040	CSTA	cystatin A	P46782	RPS5	ribosomal protein S5							Q6ZW33	MICAL2	microtubule associated monooxygenase, calponin and LIM domain containing 2
P42357	HAL	histidine ammonia-lyase	Q9HB21	PLEKHA1	pleckstrin homology domain containing A1	Q12824	SMARCB1	SWI/SNF related, matrix associated, actin dependent regulator of chromatin, subfamily b, member 1	Q96HN2	AHCYL2	adenosylhomocysteinase like 2							O60256	PRPSAP2	phosphoribosyl pyrophosphate synthetase associated protein 2
P43115	PTGER3	prostaglandin E receptor 3	Q9Y5H3	PCDHGA10	protocadherin gamma subfamily A, 10	P02771	AFP	alpha fetoprotein	P0DPB6	POLR1D	RNA polymerase I and III subunit D							O94876	TMCC1	transmembrane and coiled-coil domain family 1
Q9Y5P1	OR51B2	olfactory receptor family 51 subfamily B member 2	P55283	CDH4	cadherin 4	Q8TCV5	WFDC5	WAP four-disulfide core domain 5	Q7Z7A3	CTU1	cytosolic thiouridylase subunit 1							P51153	RAB13	RAB13, member RAS oncogene family
P25089	FPR3	formyl peptide receptor 3	Q13868	EXOSC2	exosome component 2	P48553	TRAPPC10	trafficking protein particle complex subunit 10	P17987	TCP1	t-complex 1							Q14562	DHX8	DEAH-box helicase 8
Q6UWL2	SUSD1	sushi domain containing 1	Q9BRJ6	C7orf50	chromosome 7 open reading frame 50	Q99727	TIMP4	TIMP metallopeptidase inhibitor 4	Q9NR45	NANS	N-acetylneuraminate synthase							P62736	ACTA2	actin alpha 2, smooth muscle
Q9P265	DIP2B	disco interacting protein 2 homolog B	Q96MF7	NSMCE2	NSE2 (MMS21) homolog, SMC5-SMC6 complex SUMO ligase	Q8N8U9	BMPER	BMP binding endothelial regulator	Q8WUI4	HDAC7	histone deacetylase 7							Q5T160	RARS2	arginyl-tRNA synthetase 2, mitochondrial
O15218	GPR182	G protein-coupled receptor 182	Q9Y3E5	PTRH2	peptidyl-tRNA hydrolase 2	Q01954	BNC1	basonuclin zinc finger protein 1	Q99638	RAD9A	RAD9 checkpoint clamp component A							Q9Y2V2	CARHSP1	calcium regulated heat stable protein 1
Q86XD8	ZFAND4	zinc finger AN1-type containing 4	P23467	PTPRB	protein tyrosine phosphatase receptor type B	O14788	TNFSF11	TNF superfamily member 11	P60900	PSMA6	proteasome 20S subunit alpha 6							O95859	TSPAN12	tetraspanin 12
Q8IY49	MMD2	monocyte to macrophage differentiation associated 2	Q9H7B2	RPF2	ribosome production factor 2 homolog	Q6UX98	ZDHHC24	zinc finger DHHC-type containing 24	P48643	CCT5	chaperonin containing TCP1 subunit 5							P57775	FBXW4	F-box and WD repeat domain containing 4
P05109	S100A8	S100 calcium binding protein A8	Q14028	CNGB1	cyclic nucleotide gated channel subunit beta 1	Q9NQL2	RRAGD	Ras related GTP binding D	Q9Y295	DRG1	developmentally regulated GTP binding protein 1							Q9BZD4	NUF2	NUF2 component of NDC80 kinetochore complex
S4R3C0	IGHV3OR16-17	immunoglobulin heavy variable 3/OR16-17 (non-functional)	Q96EH8	NEURL3	neuralized E3 ubiquitin protein ligase 3	Q6PIJ6	FBXO38	F-box protein 38	O43865	AHCYL1	adenosylhomocysteinase like 1							P30038	ALDH4A1	aldehyde dehydrogenase 4 family member A1
P0DTE8	AMY1C	amylase alpha 1C	A0A1W2PP81	TAF11L5	TATA-box binding protein associated factor 11 like 5	Q7Z5J8	ANKAR	ankyrin and armadillo repeat containing	P15880	RPS2	ribosomal protein S2							Q8WXW3	PIBF1	progesterone immunomodulatory binding factor 1
P46093	GPR4	G protein-coupled receptor 4	Q8WV24	PHLDA1	pleckstrin homology like domain family A member 1	P0C7P3	SLFN14	schlafen family member 14	P25786	PSMA1	proteasome 20S subunit alpha 1							P78406	RAE1	ribonucleic acid export 1
P08236	GUSB	glucuronidase beta	Q6PEV8	FAM199X	family with sequence similarity 199, X-linked	Q0VDG4	SCRN3	secernin 3	P33992	MCM5	minichromosome maintenance complex component 5							P60602	ROMO1	reactive oxygen species modulator 1
P48741	HSPA7	heat shock protein family A (Hsp70) member 7 (pseudogene)	Q9UL49	TCFL5	transcription factor like 5	Q9H9E3	COG4	component of oligomeric golgi complex 4	P78371	CCT2	chaperonin containing TCP1 subunit 2							P55103	INHBC	inhibin subunit beta C
P04435	TRBV7-9	T cell receptor beta variable 7-9	P08559	PDHA1	pyruvate dehydrogenase E1 subunit alpha 1	Q9H0X9	OSBPL5	oxysterol binding protein like 5	Q9NX24	NHP2	NHP2 ribonucleoprotein							Q9Y6M5	SLC30A1	solute carrier family 30 member 1
Q8NGH6	OR52L2P	olfactory receptor family 52 subfamily L member 2 pseudogene	Q9NR77	PXMP2	peroxisomal membrane protein 2	P52744	ZNF138	zinc finger protein 138	P62888	RPL30	ribosomal protein L30							O95678	KRT75	keratin 75
Q9HBZ2	ARNT2	aryl hydrocarbon receptor nuclear translocator 2	A5PLN9	TRAPPC13	trafficking protein particle complex subunit 13	Q6ZV73	FGD6	FYVE, RhoGEF and PH domain containing 6	P18621	RPL17	ribosomal protein L17							Q53ET0	CRTC2	CREB regulated transcription coactivator 2
O95800	GPR75	G protein-coupled receptor 75	P42345	MTOR	mechanistic target of rapamycin kinase	P53420	COL4A4	collagen type IV alpha 4 chain	P28066	PSMA5	proteasome 20S subunit alpha 5							O43752	STX6	syntaxin 6
P78381	SLC35A2	solute carrier family 35 member A2	Q8WVJ2	NUDCD2	NudC domain containing 2	Q12882	DPYD	dihydropyrimidine dehydrogenase	Q14565	DMC1	DNA meiotic recombinase 1							Q8N998	CCDC89	coiled-coil domain containing 89
Q86WH2	RASSF3	Ras association domain family member 3	P98160	HSPG2	heparan sulfate proteoglycan 2	P57764	GSDMD	gasdermin D	O14802	POLR3A	RNA polymerase III subunit A							Q5TYW2	ANKRD20A1	ankyrin repeat domain 20 family member A1
A0A1W2PPK0	CPHXL2	cytoplasmic polyadenylated homeobox like 2	Q9UF11	PLEKHB1	pleckstrin homology domain containing B1	Q8NEZ2	VPS37A	VPS37A subunit of ESCRT-I	O75306	NDUFS2	NADH:ubiquinone oxidoreductase core subunit S2							Q9BRT3	MIEN1	migration and invasion enhancer 1
P29144	TPP2	tripeptidyl peptidase 2	Q92835	INPP5D	inositol polyphosphate-5-phosphatase D	O95750	FGF19	fibroblast growth factor 19	Q9Y2Q5	LAMTOR2	late endosomal/lysosomal adaptor, MAPK and MTOR activator 2							P26441	CNTF	ciliary neurotrophic factor
P32239	CCKBR	cholecystokinin B receptor	Q13477	MADCAM1	mucosal vascular addressin cell adhesion molecule 1	Q7L8J4	SH3BP5L	SH3 binding domain protein 5 like	Q06609	RAD51	RAD51 recombinase							Q9BYD3	MRPL4	mitochondrial ribosomal protein L4
O60906	SMPD2	sphingomyelin phosphodiesterase 2	Q6NXE6	ARMC6	armadillo repeat containing 6	Q8TBE0	BAHD1	bromo adjacent homology domain containing 1	P25789	PSMA4	proteasome 20S subunit alpha 4							Q6PKG0-3	LARP1	La ribonucleoprotein 1, translational regulator
Q9NYV7	TAS2R16	taste 2 receptor member 16	Q9P299	COPZ2	COPI coat complex subunit zeta 2	P0DJD1	RGPD2	RANBP2 like and GRIP domain containing 2	P62280	RPS11	ribosomal protein S11							O00124	UBXN8	UBX domain protein 8
Q8NH18	OR5J2	olfactory receptor family 5 subfamily J member 2	Q8WUJ0	STYX	serine/threonine/tyrosine interacting protein	Q9H857	NT5DC2	5'-nucleotidase domain containing 2	Q9GZV4	EIF5A2	eukaryotic translation initiation factor 5A2							O60907	TBL1X	transducin beta like 1 X-linked
Q96QV1	HHIP	hedgehog interacting protein	O75396	SEC22B	SEC22 homolog B, vesicle trafficking protein	P57682	KLF3	KLF transcription factor 3	Q8NB90	SPATA5	Ribosome biogenesis protein SPATA5 (EC 3.6.4.10) (Spermatogenesis-associated factor protein) (Spermatogenesis-associated protein 5)							Q14494	NFE2L1	NFE2 like bZIP transcription factor 1
Q5T1C6	THEM4	thioesterase superfamily member 4	Q13387	MAPK8IP2	mitogen-activated protein kinase 8 interacting protein 2	Q8IX21	SLF2	SMC5-SMC6 complex localization factor 2	P25788	PSMA3	proteasome 20S subunit alpha 3							Q9BT49	THAP7	THAP domain containing 7
Q96DP5	MTFMT	mitochondrial methionyl-tRNA formyltransferase	H7C241	CLDN34	claudin 34	Q5TIE3	VWA5B1	von Willebrand factor A domain containing 5B1	Q9BVS4	RIOK2	RIO kinase 2							Q9UJW9	SERTAD3	SERTA domain containing 3
Q9H2H8	PPIL3	peptidylprolyl isomerase like 3	Q8IUR0	TRAPPC5	trafficking protein particle complex subunit 5	P39059	COL15A1	collagen type XV alpha 1 chain	Q9BVS5	TRMT61B	tRNA methyltransferase 61B							Q8TBJ4	PLPPR1	phospholipid phosphatase related 1
P30939	HTR1F	5-hydroxytryptamine receptor 1F	Q9P2E7	PCDH10	protocadherin 10	Q96ME1	FBXL18	F-box and leucine rich repeat protein 18	A6NHQ2	FBLL1	fibrillarin like 1							Q9BY79	MFRP	membrane frizzled-related protein
Q07864	POLE	DNA polymerase epsilon, catalytic subunit	Q9BQ51	PDCD1LG2	programmed cell death 1 ligand 2	Q96N58	ZNF578	zinc finger protein 578	P23526	AHCY	adenosylhomocysteinase							Q9NRR1	CYTL1	cytokine like 1
Q6IFH4	OR6B2	olfactory receptor family 6 subfamily B member 2	Q9UN73	PCDHA6	protocadherin alpha 6	Q9NQA5	TRPV5	transient receptor potential cation channel subfamily V member 5	Q15075	EEA1	early endosome antigen 1							Q8N3G9	TMEM130	transmembrane protein 130
Q8NGM9	OR8D4	olfactory receptor family 8 subfamily D member 4	Q96CS7	PLEKHB2	pleckstrin homology domain containing B2	O15063	GARRE1	granule associated Rac and RHOG effector 1	Q6QNY1	BLOC1S2	biogenesis of lysosomal organelles complex 1 subunit 2							Q9HCE6	ARHGEF10L	Rho guanine nucleotide exchange factor 10 like
Q9Y2P5	SLC27A5	solute carrier family 27 member 5	Q08334	IL10RB	interleukin 10 receptor subunit beta	Q13404	UBE2V1	ubiquitin conjugating enzyme E2 V1	Q86SQ0	PHLDB2	pleckstrin homology like domain family B member 2							Q08881	ITK	IL2 inducible T cell kinase
Q9BUN8	DERL1	derlin 1	Q9HAW0	BRF2	BRF2 RNA polymerase III transcription initiation factor subunit	O75448	MED24	mediator complex subunit 24	Q6P474	PDXDC2P	pyridoxal dependent decarboxylase domain containing 2, pseudogene							Q63ZY3	KANK2	KN motif and ankyrin repeat domains 2
O95377	GJB5	gap junction protein beta 5	P58876	H2BC5	H2B clustered histone 5	Q6P9B9	INTS5	integrator complex subunit 5	A6NJG2	SOWAHD	sosondowah ankyrin repeat domain family member D							Q9H6X2	ANTXR1	ANTXR cell adhesion molecule 1
Q6PEW0	PRSS54	serine protease 54	Q96F44	TRIM11	tripartite motif containing 11	P35499	SCN4A	sodium voltage-gated channel alpha subunit 4	O43405	COCH	cochlin							Q8IXS2	CCDC65	coiled-coil domain containing 65
Q9NWS6	FAM118A	family with sequence similarity 118 member A	C9JDP6	CLDN25	claudin 25	Q06587	RING1	ring finger protein 1	Q9BTP6	ZBED2	zinc finger BED-type containing 2							O95976	IGSF6	immunoglobulin superfamily member 6
Q9UL52	TMPRSS11E	transmembrane serine protease 11E	O00635	TRIM38	tripartite motif containing 38	E9PB15	PTGES3L	prostaglandin E synthase 3 like	Q13636	RAB31	RAB31, member RAS oncogene family							P55036	PSMD4	proteasome 26S subunit ubiquitin receptor, non-ATPase 4
Q9Y2A9	B3GNT3	UDP-GlcNAc:betaGal beta-1,3-N-acetylglucosaminyltransferase 3	P55010	EIF5	eukaryotic translation initiation factor 5	Q8NB12	SMYD1	SET and MYND domain containing 1	O43559	FRS3	fibroblast growth factor receptor substrate 3							Q5HYW3	RTL5	retrotransposon Gag like 5
P20309	CHRM3	cholinergic receptor muscarinic 3	Q5VWC8	HACD4	3-hydroxyacyl-CoA dehydratase 4	Q93091	RNASE6	ribonuclease A family member k6	Q9Y2T4	PPP2R2C	protein phosphatase 2 regulatory subunit Bgamma							Q9Y608	LRRFIP2	LRR binding FLII interacting protein 2
Q8NHA4	OR2AE1	olfactory receptor family 2 subfamily AE member 1	Q8NEJ0	DUSP18	dual specificity phosphatase 18	P11487	FGF3	fibroblast growth factor 3	Q8WTP8	AEN	apoptosis enhancing nuclease							Q9BWT7	CARD10	caspase recruitment domain family member 10
P59901	LILRA4	leukocyte immunoglobulin like receptor A4	P52306	RAP1GDS1	Rap1 GTPase-GDP dissociation stimulator 1	P51692	STAT5B	signal transducer and activator of transcription 5B	Q9UPY5	SLC7A11	solute carrier family 7 member 11							O95072	REC8	REC8 meiotic recombination protein
Q9HBU6	ETNK1	ethanolamine kinase 1	Q86TP1	PRUNE1	prune exopolyphosphatase 1	Q8NFY4	SEMA6D	semaphorin 6D	Q9BQE3	TUBA1C	tubulin alpha 1c							P12525	MYCLP1	MYCL pseudogene 1
Q7Z769	SLC35E3	solute carrier family 35 member E3	P62805	H4C1	H4 clustered histone 1	O75487	GPC4	glypican 4	Q5T681	C10orf62	chromosome 10 open reading frame 62							A6NFD8	HELT	helt bHLH transcription factor
Q9Y6M0	PRSS21	serine protease 21	Q8NG57			Q96PU5	NEDD4L	NEDD4 like E3 ubiquitin protein ligase	Q02487	DSC2	desmocollin 2							O14569	CYB561D2	cytochrome b561 family member D2
A6NET4	OR5K3	olfactory receptor family 5 subfamily K member 3	Q96A08	H2BC1	H2B clustered histone 1	P13987	CD59	CD59 molecule (CD59 blood group)	Q567V2	MPV17L2	MPV17 mitochondrial inner membrane protein like 2							Q9UN30	SCML1	Scm polycomb group protein like 1
P78352	DLG4	discs large MAGUK scaffold protein 4	Q14181	POLA2	DNA polymerase alpha 2, accessory subunit	Q8NCL8	TMEM116	transmembrane protein 116	P22307	SCP2	sterol carrier protein 2							Q92993	KAT5	lysine acetyltransferase 5
A0A075B759	PPIAL4E	peptidylprolyl isomerase A like 4E	Q99880	H2BC13	H2B clustered histone 13	O60343	TBC1D4	TBC1 domain family member 4	A0A075B6T7	TRAV6	T cell receptor alpha variable 6							A0A1B0GVR7	FAM240C	family with sequence similarity 240 member C
A6NMS3	OR5K4	olfactory receptor family 5 subfamily K member 4	Q9BXU9	CALN1	calneuron 1	P15976	GATA1	GATA binding protein 1	O43759	SYNGR1	synaptogyrin 1							O75716	STK16	serine/threonine kinase 16
P0C645	OR4E1	olfactory receptor family 4 subfamily E member 1	Q9P2I0	CPSF2	cleavage and polyadenylation specific factor 2	Q9H9C1	VIPAS39	VPS33B interacting protein, apical-basolateral polarity regulator, spe-39 homolog	A6NEL2	SOWAHB	sosondowah ankyrin repeat domain family member B							Q8N3Y1	FBXW8	F-box and WD repeat domain containing 8
Q9H6V9	LDAH	lipid droplet associated hydrolase	P04278	SHBG	sex hormone binding globulin	Q99613	EIF3C	eukaryotic translation initiation factor 3 subunit C	P61587	RND3	Rho family GTPase 3							Q8TEA1	NSUN6	NOP2/Sun RNA methyltransferase 6
P0CG23	ZNF853	zinc finger protein 853	P16104	H2AX	H2A.X variant histone	P29034	S100A2	S100 calcium binding protein A2	C9JA33	PALM2AKAP2	PALM2 and AKAP2 fusion							Q9HBE4	IL21	interleukin 21
O95994	AGR2	anterior gradient 2, protein disulphide isomerase family member	O95257	GADD45G	growth arrest and DNA damage inducible gamma	Q4G163	FBXO43	F-box protein 43	Q9Y691	KCNMB2	potassium calcium-activated channel subfamily M regulatory beta subunit 2							P54764	EPHA4	EPH receptor A4
P12319	FCER1A	Fc epsilon receptor Ia	Q9UKD2	MRTO4	MRT4 homolog, ribosome maturation factor	P32456	GBP2	guanylate binding protein 2	B4E2M5	ANKRD66	ankyrin repeat domain 66							Q9ULW5	RAB26	RAB26, member RAS oncogene family
P62502	LCN6	lipocalin 6	O75531	BANF1	BAF nuclear assembly factor 1	Q9Y574	ASB4	ankyrin repeat and SOCS box containing 4	Q8IYK8	REM2	RRAD and GEM like GTPase 2							Q9UNM6	PSMD13	proteasome 26S subunit, non-ATPase 13
Q6PFW1	PPIP5K1	diphosphoinositol pentakisphosphate kinase 1	Q9BVP2	GNL3	G protein nucleolar 3	Q96PR1	KCNC2	potassium voltage-gated channel subfamily C member 2	Q9BSY4	CHCHD5	coiled-coil-helix-coiled-coil-helix domain containing 5							Q96QU1	PCDH15	protocadherin related 15
D6RDG8	SPOP	speckle type BTB/POZ protein	Q15149	PLEC	plectin	Q07973	CYP24A1	cytochrome P450 family 24 subfamily A member 1	O95502	NPTXR	neuronal pentraxin receptor							Q2TU34	FBP1	fructose-bisphosphatase 1
Q8NGS9	OR13C2	olfactory receptor family 13 subfamily C member 2	O14562	UBFD1	ubiquitin family domain containing 1	Q92748	THRSP	thyroid hormone responsive	Q7Z3Y9	KRT26	keratin 26							O75425	MOSPD3	motile sperm domain containing 3
Q9Y6F6	IRAG1	inositol 1,4,5-triphosphate receptor associated 1	Q9H668	STN1	STN1 subunit of CST complex	P05452	CLEC3B	C-type lectin domain family 3 member B	Q5T890	ERCC6L2	ERCC excision repair 6 like 2							Q9NYR9	NKIRAS2	NFKB inhibitor interacting Ras like 2
Q9NQY0	BIN3	bridging integrator 3	Q9H158	PCDHAC1	protocadherin alpha subfamily C, 1	Q8N3E9	PLCD3	phospholipase C delta 3	Q96Q40	CDK15	cyclin dependent kinase 15							P42772	CDKN2B	cyclin dependent kinase inhibitor 2B
Q9UJ42	GPR160	G protein-coupled receptor 160	P46778	RPL21	ribosomal protein L21	P23677	ITPKA	inositol-trisphosphate 3-kinase A	Q9H8M5	CNNM2	cyclin and CBS domain divalent metal cation transport mediator 2							Q96NY9	MUS81	MUS81 structure-specific endonuclease subunit
Q8IYX4	DND1	DND microRNA-mediated repression inhibitor 1	Q9Y5H4	PCDHGA1	protocadherin gamma subfamily A, 1	O95427	PIGN	phosphatidylinositol glycan anchor biosynthesis class N	O95670	ATP6V1G2	ATPase H+ transporting V1 subunit G2							Q05329	GAD2	glutamate decarboxylase 2
A0A075B6W5	TRAV23DV6	T cell receptor alpha variable 23/delta variable 6	P30679	GNA15	G protein subunit alpha 15	Q5MNV8	FBXO47	F-box protein 47	P51793	CLCN4	chloride voltage-gated channel 4							Q8TE02	ELP5	elongator acetyltransferase complex subunit 5
P49841	GSK3B	glycogen synthase kinase 3 beta	Q05397	PTK2	protein tyrosine kinase 2	Q14974	KPNB1	karyopherin subunit beta 1	Q9NZ42	PSENEN	presenilin enhancer, gamma-secretase subunit							O15403	SLC16A6	solute carrier family 16 member 6
Q2M296	MTHFSD	methenyltetrahydrofolate synthetase domain containing	Q9NXL9	MCM9	minichromosome maintenance 9 homologous recombination repair factor	Q1HG44	DUOXA2	dual oxidase maturation factor 2	P58166	INHBE	inhibin subunit beta E							O95772	STARD3NL	STARD3 N-terminal like
Q969S2	NEIL2	nei like DNA glycosylase 2	Q6GMV3	PTRHD1	peptidyl-tRNA hydrolase domain containing 1	Q9NW61	PLEKHJ1	pleckstrin homology domain containing J1	Q9H3H5	DPAGT1	dolichyl-phosphate N-acetylglucosaminephosphotransferase 1							Q6PJW8	CNST	consortin, connexin sorting protein
P07288	KLK3	kallikrein related peptidase 3	Q9BWT3	PAPOLG	poly(A) polymerase gamma	P61565	ERVK-21	endogenous retrovirus group K member 21, envelope	P35241	RDX	radixin							P08729	KRT7	keratin 7
Q8WXK3	ASB13	ankyrin repeat and SOCS box containing 13	Q8NHW5	RPLP0P6	ribosomal protein lateral stalk subunit P0 pseudogene 6	Q9H0R5	GBP3	guanylate binding protein 3	Q96HB5	CCDC120	coiled-coil domain containing 120							P31942	HNRNPH3	heterogeneous nuclear ribonucleoprotein H3
P20591	MX1	MX dynamin like GTPase 1	A0A3B3IU63	H2AL3	H2A.L variant histone 3	P78325	ADAM8	ADAM metallopeptidase domain 8	Q15126	PMVK	phosphomevalonate kinase							P55042	RRAD	RRAD, Ras related glycolysis inhibitor and calcium channel regulator
P08218	CELA2B	chymotrypsin like elastase 2B	A6NKH3	RPL37AP8	ribosomal protein L37a pseudogene 8	P04150	NR3C1	nuclear receptor subfamily 3 group C member 1	O75751	SLC22A3	solute carrier family 22 member 3							P0C7W6	CCDC172	coiled-coil domain containing 172
P40313	CTRL	chymotrypsin like	Q12974	PTP4A2	protein tyrosine phosphatase 4A2	P19397	CD53	CD53 molecule	Q4G0X9	CCDC40	coiled-coil domain containing 40							B2RV13	CFAP97D1	CFAP97 domain containing 1
Q12959	DLG1	discs large MAGUK scaffold protein 1	Q9GZN8	C20orf27	UPF0687 protein C20orf27	Q9H9J2	MRPL44	mitochondrial ribosomal protein L44	O15126	SCAMP1	secretory carrier membrane protein 1							Q96FK6	WDR89	WD repeat domain 89
Q9BV10	ALG12	ALG12 alpha-1,6-mannosyltransferase	Q96KV6	BTN2A3P	butyrophilin subfamily 2 member A3, pseudogene	Q92665	MRPS31	mitochondrial ribosomal protein S31	O43663	PRC1	protein regulator of cytokinesis 1							P0DMR2	SCGB1C2	secretoglobin family 1C member 2
Q9Y5N1	HRH3	histamine receptor H3	Q08493	PDE4C	phosphodiesterase 4C	P29322	EPHA8	EPH receptor A8	Q9UQ07	MOK	MOK protein kinase							P17174	GOT1	glutamic-oxaloacetic transaminase 1
Q8N6T7	SIRT6	sirtuin 6	A4D1Z8	GRIFIN	galectin-related inter-fiber protein	Q96JC4	ZNF479	zinc finger protein 479	O15270	SPTLC2	serine palmitoyltransferase long chain base subunit 2							O15400	STX7	syntaxin 7
A0A0B4J273	TRAV34	T cell receptor alpha variable 34	Q9BU02	THTPA	thiamine triphosphatase	O60687	SRPX2	sushi repeat containing protein X-linked 2	Q96AH0	NABP1	nucleic acid binding protein 1							P56962	STX17	syntaxin 17
Q8N414	PGBD5	piggyBac transposable element derived 5	Q9Y4F3	MARF1	meiosis regulator and mRNA stability factor 1	O95782	AP2A1	adaptor related protein complex 2 subunit alpha 1	O60568	PLOD3	procollagen-lysine,2-oxoglutarate 5-dioxygenase 3							B2RXH8	HNRNPCL2	heterogeneous nuclear ribonucleoprotein C like 2
Q9Y570	PPME1	protein phosphatase methylesterase 1	O75678	RFPL2	ret finger protein like 2	Q9Y330	ZBTB12	zinc finger and BTB domain containing 12	Q96BD8	SKA1	spindle and kinetochore associated complex subunit 1							Q96HM7	PCED1B	PC-esterase domain containing 1B
Q8TDM6	DLG5	discs large MAGUK scaffold protein 5	Q14919	DRAP1	DR1 associated protein 1	P0DJD0	RGPD1	RANBP2 like and GRIP domain containing 1	O43424	GRID2	glutamate ionotropic receptor delta type subunit 2							O75940	SMNDC1	survival motor neuron domain containing 1
P40197	GP5	glycoprotein V platelet	Q96G21	IMP4	IMP U3 small nucleolar ribonucleoprotein 4	Q99909	SSX3	SSX family member 3	Q96NX9	DACH2	dachshund family transcription factor 2							Q969E2	SCAMP4	secretory carrier membrane protein 4
Q8TDQ7	GNPDA2	glucosamine-6-phosphate deaminase 2	Q9H633	RPP21	ribonuclease P/MRP subunit p21	Q96KV7	WDR90	WD repeat domain 90	P13196	ALAS1	5'-aminolevulinate synthase 1							Q9NYS0	NKIRAS1	NFKB inhibitor interacting Ras like 1
Q99678	GPR20	G protein-coupled receptor 20	Q9HCK5	AGO4	argonaute RISC component 4	O60353	FZD6	frizzled class receptor 6	A6NEE1	PLEKHD1	pleckstrin homology and coiled-coil domain containing D1							A8MYZ5	IQCF6	IQ motif containing F6
O43463	SUV39H1	SUV39H1 histone lysine methyltransferase	P0CG21	NHLRC4	NHL repeat containing 4	P33402	GUCY1A2	guanylate cyclase 1 soluble subunit alpha 2	P78316	NOP14	NOP14 nucleolar protein							O75600	GCAT	glycine C-acetyltransferase
O43808	SLC25A17	solute carrier family 25 member 17	Q8N6L1	KRTCAP2	keratinocyte associated protein 2	P19174	PLCG1	phospholipase C gamma 1	Q15772	SPEG	striated muscle enriched protein kinase							Q3MIP1	ITPRIPL2	ITPRIP like 2
Q9NVH6	TMLHE	trimethyllysine hydroxylase, epsilon	Q8N5L8	RPP25L	ribonuclease P/MRP subunit p25 like	Q14681	KCTD2	potassium channel tetramerization domain containing 2	P01721	IGLV6-57	immunoglobulin lambda variable 6-57							O60902	SHOX2	SHOX homeobox 2
Q6P2D8	XRRA1	X-ray radiation resistance associated 1	Q86U38	NOP9	NOP9 nucleolar protein	P14091	CTSE	cathepsin E	P78380	OLR1	oxidized low density lipoprotein receptor 1							Q5U5X0	LYRM7	LYR motif containing 7
Q14568	HSP90AA2P	heat shock protein 90 alpha family class A member 2, pseudogene	Q6F5E8	CARMIL2	capping protein regulator and myosin 1 linker 2	Q5JSS6	MEIG1	meiosis/spermiogenesis associated 1	Q8NE01	CNNM3	cyclin and CBS domain divalent metal cation transport mediator 3							Q68CZ1	RPGRIP1L	RPGRIP1 like
Q17R98	ZNF827	zinc finger protein 827	Q9C019	TRIM15	tripartite motif containing 15	Q7KZN9	COX15	cytochrome c oxidase assembly homolog COX15	Q9Y692	GMEB1	glucocorticoid modulatory element binding protein 1							Q6ZMQ8	AATK	apoptosis associated tyrosine kinase
Q04756	HGFAC	HGF activator	Q8N257	H2BC26	H2B clustered histone 26	Q9UKP4	ADAMTS7	ADAM metallopeptidase with thrombospondin type 1 motif 7	P05362	ICAM1	intercellular adhesion molecule 1							P31269	HOXA9	homeobox A9
Q96RI8	TAAR6	trace amine associated receptor 6	Q9H596	DUSP21	dual specificity phosphatase 21	Q9NT62	ATG3	autophagy related 3	Q9NVM6	DNAJC17	DnaJ heat shock protein family (Hsp40) member C17							Q53EZ4	CEP55	centrosomal protein 55
A0A577	TRBV4-1	T cell receptor beta variable 4-1	Q9NRW4	DUSP22	dual specificity phosphatase 22	Q9NRW7	VPS45	vacuolar protein sorting 45 homolog	A2RUH7	MYBPHL	myosin binding protein H like							Q6SPF0	SAMD1	sterile alpha motif domain containing 1
O43869	OR2T1	olfactory receptor family 2 subfamily T member 1	Q63HQ2	EGFLAM	EGF like, fibronectin type III and laminin G domains	Q9UJQ1	LAMP5	lysosomal associated membrane protein family member 5	P09497	CLTB	clathrin light chain B							Q9BXG8	SPZ1	spermatogenic leucine zipper 1
Q96QH8	SPACA5	sperm acrosome associated 5	Q13488	TCIRG1	T cell immune regulator 1, ATPase H+ transporting V0 subunit a3	Q969T3	SNX21	sorting nexin family member 21	P22061	PCMT1	protein-L-isoaspartate (D-aspartate) O-methyltransferase							P14859	POU2F1	POU class 2 homeobox 1
Q9P2X3	IMPACT	impact RWD domain protein	Q6IMN6	CAPRIN2	caprin family member 2	Q9BZC7	ABCA2	ATP binding cassette subfamily A member 2	P17509	HOXB6	homeobox B6							Q96NY8	NECTIN4	nectin cell adhesion molecule 4
Q9UQ13	SHOC2	SHOC2 leucine rich repeat scaffold protein	Q9UN19	DAPP1	dual adaptor of phosphotyrosine and 3-phosphoinositides 1	Q6TDU7	DNAI7	dynein axonemal intermediate chain 7	Q7KYR7	BTN2A1	butyrophilin subfamily 2 member A1							P20711	DDC	dopa decarboxylase
P59534	TAS2R39	taste 2 receptor member 39	Q9UN74	PCDHA4	protocadherin alpha 4	Q96EW2	HSPBAP1	HSPB1 associated protein 1	Q9Y6N1	COX11	cytochrome c oxidase copper chaperone COX11							P19484	TFEB	transcription factor EB
P15586	GNS	glucosamine (N-acetyl)-6-sulfatase	Q2YD98	UVSSA	UV stimulated scaffold protein A	O75954	TSPAN9	tetraspanin 9	A4D2B0	MBLAC1	metallo-beta-lactamase domain containing 1							Q6UXD7	SLC49A3	solute carrier family 49 member 3
A4D1T9	PRSS37	serine protease 37	Q9Y2W2	WBP11	WW domain binding protein 11	P53801	PTTG1IP	PTTG1 interacting protein	Q9BTL4	IER2	immediate early response 2							P49915	GMPS	guanine monophosphate synthase
P47985	UQCRFS1	ubiquinol-cytochrome c reductase, Rieske iron-sulfur polypeptide 1	Q9Y5G2	PCDHGB2	protocadherin gamma subfamily B, 2	Q96KN1	LRATD2	LRAT domain containing 2	P17542	TAL1	TAL bHLH transcription factor 1, erythroid differentiation factor							P28072	PSMB6	proteasome 20S subunit beta 6
Q2M3R5	SLC35G1	solute carrier family 35 member G1	Q2WGN9	GAB4	GRB2 associated binding protein family member 4	Q8IWY9	CDAN1	codanin 1	Q96S15	WDR24	WD repeat domain 24							P0DPB3	SCHIP1	schwannomin interacting protein 1
Q9H6Z9	EGLN3	egl-9 family hypoxia inducible factor 3	Q9UJK0	TSR3	TSR3 ribosome maturation factor	P50747	HLCS	holocarboxylase synthetase	P61006	RAB8A	RAB8A, member RAS oncogene family							Q96JT2	SLC45A3	solute carrier family 45 member 3
Q8IUS5	EPHX4	epoxide hydrolase 4	Q9Y243	AKT3	AKT serine/threonine kinase 3	Q8WWZ1	IL1F10	interleukin 1 family member 10	Q8N427	NME8	NME/NM23 family member 8							Q9Y2W3	SLC45A1	solute carrier family 45 member 1
P30049	ATP5F1D	ATP synthase F1 subunit delta	Q99877	H2BC15	H2B clustered histone 15	Q96CG3	TIFA	TRAF interacting protein with forkhead associated domain	Q96E39	RBMXL1	RBMX like 1							Q8IYE0	CCDC146	coiled-coil domain containing 146
P51681	CCR5	C-C motif chemokine receptor 5	A9UHW6	MIF4GD	MIF4G domain containing	Q6P3W7	SCYL2	SCY1 like pseudokinase 2	Q9NX74	DUS2	dihydrouridine synthase 2							Q96I99	SUCLG2	succinate-CoA ligase GDP-forming subunit beta
O95551	TDP2	tyrosyl-DNA phosphodiesterase 2	O75312	ZPR1	ZPR1 zinc finger	Q9NXD2	MTMR10	myotubularin related protein 10	P26196	DDX6	DEAD-box helicase 6							Q96GM1	PLPPR2	phospholipid phosphatase related 2
A0A0C4DH38	IGHV5-51	immunoglobulin heavy variable 5-51	P0C5Y9	H2AB1	H2A.B variant histone 1	Q9Y5X1	SNX9	sorting nexin 9	Q6ZQY3	GADL1	glutamate decarboxylase like 1							P57081	WDR4	WD repeat domain 4
O75354	ENTPD6	ectonucleoside triphosphate diphosphohydrolase 6	Q16385	SSX2	SSX family member 2	Q86XP0	PLA2G4D	phospholipase A2 group IVD	Q92968	PEX13	peroxisomal biogenesis factor 13							O00212	RHOD	ras homolog family member D
Q8TF46	DIS3L	DIS3 like exosome 3'-5' exoribonuclease	Q68D85	NCR3LG1	natural killer cell cytotoxicity receptor 3 ligand 1	Q8NBR6	MINDY2	MINDY lysine 48 deubiquitinase 2	Q9UET6	FTSJ1	FtsJ RNA 2'-O-methyltransferase 1							P85173		Phosphate-binding protein (HPBP)
Q9BWQ8	FAIM2	Fas apoptotic inhibitory molecule 2	Q8NCJ5	SPRYD3	SPRY domain containing 3	Q9BT40	INPP5K	inositol polyphosphate-5-phosphatase K	P41159	LEP	leptin							Q569H4	PRR16	proline rich 16
Q8NH21	OR4F5	olfactory receptor family 4 subfamily F member 5	P04908	H2AC4	H2A clustered histone 4	Q8NFM4	ADCY4	adenylate cyclase 4	Q8IZ57	NRSN1	neurensin 1							Q02252	ALDH6A1	aldehyde dehydrogenase 6 family member A1
O95801	TTC4	tetratricopeptide repeat domain 4	Q14008	CKAP5	cytoskeleton associated protein 5	O60828	PQBP1	polyglutamine binding protein 1	Q9NPF4	OSGEP	O-sialoglycoprotein endopeptidase							Q16621	NFE2	nuclear factor, erythroid 2
Q5VT66	MTARC1	mitochondrial amidoxime reducing component 1	P62380	TBPL1	TATA-box binding protein like 1	P05976	MYL1	myosin light chain 1	Q14126	DSG2	desmoglein 2							Q96NT1	NAP1L5	nucleosome assembly protein 1 like 5
Q0Z7S8	FABP9	fatty acid binding protein 9	Q13415	ORC1	origin recognition complex subunit 1	P34810	CD68	CD68 molecule	Q92615	LARP4B	La ribonucleoprotein 4B							Q86XI6	PPP1R3B	protein phosphatase 1 regulatory subunit 3B
Q6RI45	BRWD3	bromodomain and WD repeat domain containing 3	P10586	PTPRF	protein tyrosine phosphatase receptor type F	Q32MH5	ATOSA	atos homolog A	Q9UNE2	RPH3AL	rabphilin 3A like (without C2 domains)							Q9NXZ2	DDX43	DEAD-box helicase 43
O43708	GSTZ1	glutathione S-transferase zeta 1	Q8N8Y2	ATP6V0D2	ATPase H+ transporting V0 subunit d2	A5D8W1	CFAP69	cilia and flagella associated protein 69	A0A075B6V5	TRAV36DV7	T cell receptor alpha variable 36/delta variable 7							P00491	PNP	purine nucleoside phosphorylase
Q9P287	BCCIP	BRCA2 and CDKN1A interacting protein	Q7Z4G4	TRMT11	tRNA methyltransferase 11 homolog	Q6DKI2	LGALS9C	galectin 9C	P56915	GSC	goosecoid homeobox							Q5VV42	CDKAL1	CDK5 regulatory subunit associated protein 1 like 1
Q6GPH6	ITPRIPL1	ITPRIP like 1	Q3MIT2	PUS10	pseudouridine synthase 10	Q7Z4M0	REC114	REC114 meiotic recombination protein	Q93088	BHMT	betaine--homocysteine S-methyltransferase							Q6ZSY5	PPP1R3F	protein phosphatase 1 regulatory subunit 3F
Q8NGQ5	OR9Q1	olfactory receptor family 9 subfamily Q member 1	Q9NPE3	NOP10	NOP10 ribonucleoprotein	Q9NWH7	SPATA6	spermatogenesis associated 6	Q9H1K6	TLNRD1	talin rod domain containing 1							P37173	TGFBR2	transforming growth factor beta receptor 2
P24158	PRTN3	proteinase 3	Q9BUE0	MED18	mediator complex subunit 18	O14625	CXCL11	C-X-C motif chemokine ligand 11	Q9UPY3	DICER1	dicer 1, ribonuclease III							Q14137	BOP1	BOP1 ribosomal biogenesis factor
Q99558	MAP3K14	mitogen-activated protein kinase kinase kinase 14	P31751	AKT2	AKT serine/threonine kinase 2	Q96T58	SPEN	spen family transcriptional repressor	Q03014	HHEX	hematopoietically expressed homeobox							P20594	NPR2	natriuretic peptide receptor 2
Q86YQ8	CPNE8	copine 8	Q8N9Z9	LMNTD1	lamin tail domain containing 1	Q9HAC8	UBTD1	ubiquitin domain containing 1	Q5SZQ8	CELF3	CUGBP Elav-like family member 3							Q9H3M7	TXNIP	thioredoxin interacting protein
A6ND48	OR14I1	olfactory receptor family 14 subfamily I member 1	Q09472	EP300	E1A binding protein p300	P01860	IGHG3	immunoglobulin heavy constant gamma 3 (G3m marker)	O15355	PPM1G	protein phosphatase, Mg2+/Mn2+ dependent 1G							Q9HBL7	PLGRKT	plasminogen receptor with a C-terminal lysine
Q07075	ENPEP	glutamyl aminopeptidase	P22090	RPS4Y1	ribosomal protein S4 Y-linked 1	Q9HAV5	EDA2R	ectodysplasin A2 receptor	A0A0G2JMP0	OR4M2B	olfactory receptor family 4 subfamily M member 2B							Q13352	ITGB3BP	integrin subunit beta 3 binding protein
Q5T9Z0	TEDDM1	transmembrane epididymal protein 1	P23527	H2BC17	H2B clustered histone 17	P51114	FXR1	FMR1 autosomal homolog 1	Q53H54	TRMT12	tRNA methyltransferase 12 homolog							O15266	SHOX	SHOX homeobox
Q5VTE6	ANGEL2	angel homolog 2	P21953	BCKDHB	branched chain keto acid dehydrogenase E1 subunit beta	P52741	ZNF134	zinc finger protein 134	O43809	NUDT21	nudix hydrolase 21							O43353	RIPK2	receptor interacting serine/threonine kinase 2
Q6ZQY2	LRRC74B	leucine rich repeat containing 74B	Q8TD55	PLEKHO2	pleckstrin homology domain containing O2	P49223	SPINT3	serine peptidase inhibitor, Kunitz type 3	Q14728	MFSD10	major facilitator superfamily domain containing 10							Q8N3Y7	SDR16C5	short chain dehydrogenase/reductase family 16C member 5
Q8NGX0	OR11L1	olfactory receptor family 11 subfamily L member 1	P20042	EIF2S2	eukaryotic translation initiation factor 2 subunit beta	A6NNL0	NUTM2B	NUT family member 2B	Q9UL41	PNMA3	PNMA family member 3							Q12946	FOXF1	forkhead box F1
Q8WUY1	THEM6	thioesterase superfamily member 6	O75900	MMP23B	matrix metallopeptidase 23B	P26651	ZFP36	ZFP36 ring finger protein	P78363	ABCA4	ATP binding cassette subfamily A member 4							Q9NVI7	ATAD3A	ATPase family AAA domain containing 3A
Q9H2C8	OR51V1	olfactory receptor family 51 subfamily V member 1	P0C5Z0	H2AB2	H2A.B variant histone 2	Q9BZK3	NACA4P	NACA family member 4, pseudogene	Q96PY6	NEK1	NIMA related kinase 1							Q8N6C8	LILRA3	leukocyte immunoglobulin like receptor A3
P29120	PCSK1	proprotein convertase subtilisin/kexin type 1	O60225	SSX5	SSX family member 5	Q9HBI0	PARVG	parvin gamma	P62263	RPS14	ribosomal protein S14							O75071	EFCAB14	EF-hand calcium binding domain 14
Q9UHW9	SLC12A6	solute carrier family 12 member 6	P40429	RPL13A	ribosomal protein L13a	P13984	GTF2F2	general transcription factor IIF subunit 2	Q86U42	PABPN1	poly(A) binding protein nuclear 1							Q9BY84	DUSP16	dual specificity phosphatase 16
Q9Y6E7	SIRT4	sirtuin 4	Q13882	PTK6	protein tyrosine kinase 6	Q0VAK6	LMOD3	leiomodin 3	A2RUB6	CCDC66	coiled-coil domain containing 66							Q3C1V8	BSX	brain specific homeobox
Q8TDS5	OXER1	oxoeicosanoid receptor 1	Q9BVJ7	DUSP23	dual specificity phosphatase 23	Q12802	AKAP13	A-kinase anchoring protein 13	Q86YS3	RAB11FIP4	RAB11 family interacting protein 4							Q5T8P6	RBM26	RNA binding motif protein 26
O60431	OR1I1	olfactory receptor family 1 subfamily I member 1	Q6GMR7	FAAH2	fatty acid amide hydrolase 2	Q6ZT12	UBR3	ubiquitin protein ligase E3 component n-recognin 3	Q5HYW2	NHSL2	NHS like 2							Q86UV6	TRIM74	tripartite motif containing 74
P50479	PDLIM4	PDZ and LIM domain 4	Q96L21	RPL10L	ribosomal protein L10 like	P55060	CSE1L	chromosome segregation 1 like	Q9P289	STK26	serine/threonine kinase 26							P51532	SMARCA4	SWI/SNF related, matrix associated, actin dependent regulator of chromatin, subfamily a, member 4
Q9BW71	HIRIP3	HIRA interacting protein 3	P01730	CD4	CD4 molecule	P54803	GALC	galactosylceramidase	Q9NYJ1	COA4	cytochrome c oxidase assembly factor 4 homolog							Q6PI97	HOATZ	HOATZ cilia and flagella associated protein
Q99758	ABCA3	ATP binding cassette subfamily A member 3	P09471	GNAO1	G protein subunit alpha o1	Q09470	KCNA1	potassium voltage-gated channel subfamily A member 1	O43293	DAPK3	death associated protein kinase 3							O15244	SLC22A2	solute carrier family 22 member 2
P59533	TAS2R38	taste 2 receptor member 38	Q9NSI5	IGSF5	immunoglobulin superfamily member 5	Q9H5J0	ZBTB3	zinc finger and BTB domain containing 3	Q96G61	NUDT11	nudix hydrolase 11							Q8N6H7	ARFGAP2	ADP ribosylation factor GTPase activating protein 2
Q6P1M0	SLC27A4	solute carrier family 27 member 4	Q9BQC3	DPH2	diphthamide biosynthesis 2	Q9HC29	NOD2	nucleotide binding oligomerization domain containing 2	A0A024RBG1	NUDT4B	nudix hydrolase 4B							Q8IZA3	H1-8	H1.8 linker histone
P11245	NAT2	N-acetyltransferase 2	Q5QNW6	H2BC18	H2B clustered histone 18	Q15762	CD226	CD226 molecule	P30305	CDC25B	cell division cycle 25B							Q9NZC7	WWOX	WW domain containing oxidoreductase
Q6PRD1	GPR179	G protein-coupled receptor 179	Q9P104	DOK5	docking protein 5	Q8WWU7	ITLN2	intelectin 2	O95319	CELF2	CUGBP Elav-like family member 2							Q9BTD8	RBM42	RNA binding motif protein 42
P59541	TAS2R30	taste 2 receptor member 30	Q16401	PSMD5	proteasome 26S subunit, non-ATPase 5	P53367	ARFIP1	ADP ribosylation factor interacting protein 1	Q96S21	RAB40C	RAB40C, member RAS oncogene family							P54868	HMGCS2	3-hydroxy-3-methylglutaryl-CoA synthase 2
P28288	ABCD3	ATP binding cassette subfamily D member 3	Q4G0W2	DUSP28	dual specificity phosphatase 28	Q13029	PRDM2	PR/SET domain 2	O00206	TLR4	toll like receptor 4							Q9H7M9	VSIR	V-set immunoregulatory receptor
O15529	GPR42	G protein-coupled receptor 42	P62807	H2BC4	H2B clustered histone 4	Q7Z406	MYH14	myosin heavy chain 14	O95747	OXSR1	oxidative stress responsive kinase 1							Q9HBB8	CDHR5	cadherin related family member 5
Q13526	PIN1	peptidylprolyl cis/trans isomerase, NIMA-interacting 1	P61927	RPL37	ribosomal protein L37	Q9ULJ6	ZMIZ1	zinc finger MIZ-type containing 1	A4D2H0	CTAGE15	CTAGE family member 15							Q9Y285	FARSA	phenylalanyl-tRNA synthetase subunit alpha
Q9UKY4	POMT2	protein O-mannosyltransferase 2	O95786	RIGI	RNA sensor RIG-I	Q13620	CUL4B	cullin 4B	P55347	PKNOX1	PBX/knotted 1 homeobox 1							P55290	CDH13	cadherin 13
Q13304	GPR17	G protein-coupled receptor 17	Q99704	DOK1	docking protein 1	Q96KQ7	EHMT2	euchromatic histone lysine methyltransferase 2	Q9H1J1	UPF3A	UPF3A regulator of nonsense mediated mRNA decay							Q9HD20	ATP13A1	ATPase 13A1
Q96P71	NECAB3	N-terminal EF-hand calcium binding protein 3	O60496	DOK2	docking protein 2	A0FGR8	ESYT2	extended synaptotagmin 2	Q9Y3F4	STRAP	serine/threonine kinase receptor associated protein							P57739	CLDN2	claudin 2
Q15619	OR1C1	olfactory receptor family 1 subfamily C member 1	P19086	GNAZ	G protein subunit alpha z	Q8NEG4	FAM83F	family with sequence similarity 83 member F	Q92541	RTF1	RTF1 homolog, Paf1/RNA polymerase II complex component							Q96HT8	MRFAP1L1	Morf4 family associated protein 1 like 1
Q96S16	JMJD8	jumonji domain containing 8	P61923	COPZ1	COPI coat complex subunit zeta 1	Q7L2R6	ZNF765	zinc finger protein 765	P57721	PCBP3	poly(rC) binding protein 3							Q9BY77	POLDIP3	DNA polymerase delta interacting protein 3
P49458	SRP9	signal recognition particle 9	Q96AY2	EME1	essential meiotic structure-specific endonuclease 1	Q8NAA5	LRRC75A	leucine rich repeat containing 75A	Q6NUM6	TYW1B	tRNA-yW synthesizing protein 1 homolog B							Q9H967	WDR76	WD repeat domain 76
P32320	CDA	cytidine deaminase	Q15008	PSMD6	proteasome 26S subunit, non-ATPase 6	Q9NS71	GKN1	gastrokine 1	P50583	NUDT2	nudix hydrolase 2							P30085	CMPK1	cytidine/uridine monophosphate kinase 1
P51124	GZMM	granzyme M	Q7Z3Z3	PIWIL3	piwi like RNA-mediated gene silencing 3	Q00604	NDP	norrin cystine knot growth factor NDP	A0A1B0GTK4	FAM237A	family with sequence similarity 237 member A							Q6P2E9	EDC4	enhancer of mRNA decapping 4
Q9H1U9	SLC25A51	solute carrier family 25 member 51	O14862	AIM2	absent in melanoma 2	Q96T37	RBM15	RNA binding motif protein 15	Q494R4	CCDC153	coiled-coil domain containing 153							Q569K6	CCDC157	coiled-coil domain containing 157
P29374	ARID4A	AT-rich interaction domain 4A	P39023	RPL3	ribosomal protein L3	P04234	CD3D	CD3 delta subunit of T-cell receptor complex	Q9Y5P4	CERT1	ceramide transporter 1							Q9H2F3	HSD3B7	hydroxy-delta-5-steroid dehydrogenase, 3 beta- and steroid delta-isomerase 7
Q4J6C6	PREPL	prolyl endopeptidase like	Q9NVN8	GNL3L	G protein nucleolar 3 like	O95425	SVIL	supervillin	Q6UQ28	PLET1	placenta expressed transcript 1							Q92522	H1-10	H1.10 linker histone
P00709	LALBA	lactalbumin alpha	Q9NV88	INTS9	integrator complex subunit 9	Q86XN6	ZNF761	zinc finger protein 761	A6NKX4	SLC22A31	solute carrier family 22 member 31							P35250	RFC2	replication factor C subunit 2
P17538	CTRB1	chymotrypsinogen B1	P50552	VASP	vasodilator stimulated phosphoprotein	Q6J272	FAM166A	Protein FAM166A	Q86U90	YRDC	yrdC N6-threonylcarbamoyltransferase domain containing							Q86W54	SPATA24	spermatogenesis associated 24
P32302	CXCR5	C-X-C motif chemokine receptor 5	P25208	NFYB	nuclear transcription factor Y subunit beta	O15162	PLSCR1	phospholipid scramblase 1	Q8N443	RIBC1	RIB43A domain with coiled-coils 1							P0DOY3	IGLC3	immunoglobulin lambda constant 3 (Kern-Oz+ marker)
A0A0K0K1B3	TRBV30	T cell receptor beta variable 30	Q14142	TRIM14	tripartite motif containing 14	Q9BVA6	FICD	FIC domain protein adenylyltransferase	Q07065	CKAP4	cytoskeleton associated protein 4							Q6UX01	LMBR1L	limb development membrane protein 1 like
A6NMU1	OR52A4P	olfactory receptor family 52 subfamily A member 4 pseudogene	Q53GA4	PHLDA2	pleckstrin homology like domain family A member 2	Q8IZQ8	MYOCD	myocardin	Q5JQC9	AKAP4	A-kinase anchoring protein 4							P16442	ABO	ABO, alpha 1-3-N-acetylgalactosaminyltransferase and alpha 1-3-galactosyltransferase
P15090	FABP4	fatty acid binding protein 4	Q8TAB3	PCDH19	protocadherin 19	Q13422	IKZF1	IKAROS family zinc finger 1	Q6T4R5	NHS	NHS actin remodeling regulator							Q96QR8	PURB	purine rich element binding protein B
Q9H8M7	MINDY3	MINDY lysine 48 deubiquitinase 3	Q9UHD1	CHORDC1	cysteine and histidine rich domain containing 1	Q9Y6L7	TLL2	tolloid like 2	Q9UBS5	GABBR1	gamma-aminobutyric acid type B receptor subunit 1							Q9C0D2	CEP295	centrosomal protein 295
P40225	THPO	thrombopoietin	Q495X7	TRIM60	tripartite motif containing 60	Q9H6A0	DENND2D	DENN domain containing 2D	Q9BRI3	SLC30A2	solute carrier family 30 member 2							Q9BQ50	TREX2	three prime repair exonuclease 2
Q2M2H8	MGAM2	maltase-glucoamylase 2 (putative)	P62241	RPS8	ribosomal protein S8	Q71F56	MED13L	mediator complex subunit 13L	Q9BQD7	ANTKMT	adenine nucleotide translocase lysine methyltransferase							Q6NT76	HMBOX1	homeobox containing 1
A0A1W2PQC6	SSU72P4	RNA polymerase II subunit A C-terminal domain phosphatase SSU72 (CTD phosphatase SSU72) (EC 3.1.3.16)	P51003	PAPOLA	poly(A) polymerase alpha	Q6PF15	KLHL35	kelch like family member 35	Q14534	SQLE	squalene epoxidase							Q9NY65	TUBA8	tubulin alpha 8
Q6PEZ8	PODNL1	podocan like 1	Q9UBI6	GNG12	G protein subunit gamma 12	Q9NQB0	TCF7L2	transcription factor 7 like 2	Q96Q35	FLACC1	flagellum associated containing coiled-coil domains 1							Q9UKE5	TNIK	TRAF2 and NCK interacting kinase
P41143	OPRD1	opioid receptor delta 1	Q13480	GAB1	GRB2 associated binding protein 1	O60381	HBP1	HMG-box transcription factor 1	Q8WUX1	SLC38A5	solute carrier family 38 member 5							Q8N6F8	METTL27	methyltransferase like 27
P30411	BDKRB2	bradykinin receptor B2	Q9UNI6	DUSP12	dual specificity phosphatase 12	Q9BT23	LIMD2	LIM domain containing 2	P35523	CLCN1	chloride voltage-gated channel 1							P13569	CFTR	CF transmembrane conductance regulator
Q5JPI3	C3orf38	chromosome 3 open reading frame 38	Q9Y5G7	PCDHGA6	protocadherin gamma subfamily A, 6	Q9HCE0	EPG5	ectopic P-granules 5 autophagy tethering factor	Q8N4G2	ARL14	ADP ribosylation factor like GTPase 14							Q9NQ40	SLC52A3	solute carrier family 52 member 3
Q99685	MGLL	monoglyceride lipase	Q9NSD9	FARSB	phenylalanyl-tRNA synthetase subunit beta	Q96L92	SNX27	sorting nexin 27	O75628	REM1	RRAD and GEM like GTPase 1							O75414	NME6	NME/NM23 nucleoside diphosphate kinase 6
O43602	DCX	doublecortin	Q15544	TAF11	TATA-box binding protein associated factor 11	P19827	ITIH1	inter-alpha-trypsin inhibitor heavy chain 1	Q92878	RAD50	RAD50 double strand break repair protein							Q9Y4P3	TBL2	transducin beta like 2
Q9NXP7	GIN1	gypsy retrotransposon integrase 1	Q9UN71	PCDHGB4	protocadherin gamma subfamily B, 4	O95180	CACNA1H	calcium voltage-gated channel subunit alpha1 H	Q9UBQ6	EXTL2	exostosin like glycosyltransferase 2							Q3KP66	INAVA	innate immunity activator
Q5JR98	DYNLT4	dynein light chain Tctex-type 4	Q9H0V9	LMAN2L	lectin, mannose binding 2 like	Q9UK17	KCND3	potassium voltage-gated channel subfamily D member 3	O95073	FSBP	fibrinogen silencer binding protein							Q96RR4	CAMKK2	calcium/calmodulin dependent protein kinase kinase 2
P21554	CNR1	cannabinoid receptor 1	P55287	CDH11	cadherin 11	Q8IU81	IRF2BP1	interferon regulatory factor 2 binding protein 1	Q8IXS6	PALM2	paralemmin 2							Q9GZM8	NDEL1	nudE neurodevelopment protein 1 like 1
Q9H3S5	PIGM	phosphatidylinositol glycan anchor biosynthesis class M	P49848	TAF6	TATA-box binding protein associated factor 6	Q8WVD3	RNF138	ring finger protein 138	Q12870	TCF15	transcription factor 15							Q9P2M7	CGN	cingulin
P49326	FMO5	flavin containing dimethylaniline monoxygenase 5	Q9Y535	POLR3H	RNA polymerase III subunit H	Q9BQA9	CYBC1	cytochrome b-245 chaperone 1	A4D126	CRPPA	CDP-L-ribitol pyrophosphorylase A							Q9Y6X5	ENPP4	ectonucleotide pyrophosphatase/phosphodiesterase 4
P0C025	NUDT17	nudix hydrolase 17	Q5TEC6	H3-7	H3.7 histone (putative)	O75864	PPP1R37	protein phosphatase 1 regulatory subunit 37	P30043	BLVRB	biliverdin reductase B							O95471	CLDN7	claudin 7
A6NI73	LILRA5	leukocyte immunoglobulin like receptor A5	Q9UGJ0	PRKAG2	protein kinase AMP-activated non-catalytic subunit gamma 2	P11055	MYH3	myosin heavy chain 3	A6NH57	ARL5C	ADP ribosylation factor like GTPase 5C							O75052	NOS1AP	nitric oxide synthase 1 adaptor protein
P09238	MMP10	matrix metallopeptidase 10	Q07020	RPL18	ribosomal protein L18	Q8NCG5	CHST4	carbohydrate sulfotransferase 4	Q5I0G3	MDH1B	malate dehydrogenase 1B							O43680	TCF21	transcription factor 21
Q01780	EXOSC10	exosome component 10	Q9UII6	DUSP13	Dual specificity protein phosphatase 13 isoform B (DUSP13B) (EC 3.1.3.16) (EC 3.1.3.48) (Dual specificity phosphatase SKRP4) (Testis- and skeletal-muscle-specific DSP)	Q9NY61	AATF	apoptosis antagonizing transcription factor	Q8WWN9	IPCEF1	interaction protein for cytohesin exchange factors 1							P0C7M6	IQCF3	IQ motif containing F3
Q7Z7J7	LHFPL4	LHFPL tetraspan subfamily member 4	O15514	POLR2D	RNA polymerase II subunit D	Q9BXL6	CARD14	caspase recruitment domain family member 14	Q9BXF6	RAB11FIP5	RAB11 family interacting protein 5							Q8IWZ5	TRIM42	tripartite motif containing 42
Q7L5N7	LPCAT2	lysophosphatidylcholine acyltransferase 2	P24522	GADD45A	growth arrest and DNA damage inducible alpha	Q9P2W1	PSMC3IP	PSMC3 interacting protein	O75030	MITF	melanocyte inducing transcription factor							O95807	TMEM50A	transmembrane protein 50A
Q96JP0	FEM1C	fem-1 homolog C	Q7Z5L3	C1QL2	complement C1q like 2	O76062	TM7SF2	transmembrane 7 superfamily member 2	P82932	MRPS6	mitochondrial ribosomal protein S6							Q9NYB9	ABI2	abl interactor 2
Q9NZV6	MSRB1	methionine sulfoxide reductase B1	P55286	CDH8	cadherin 8	Q9UI15	TAGLN3	transgelin 3	Q16206	ENOX2	ecto-NOX disulfide-thiol exchanger 2							O75110	ATP9A	ATPase phospholipid transporting 9A (putative)
O94777	DPM2	dolichyl-phosphate mannosyltransferase subunit 2, regulatory	Q6PJ69	TRIM65	tripartite motif containing 65	O75182	SIN3B	SIN3 transcription regulator family member B	P36404	ARL2	ADP ribosylation factor like GTPase 2							Q9NZ43	USE1	unconventional SNARE in the ER 1
Q6DWJ6	GPR139	G protein-coupled receptor 139	Q9Y4X0	AMMECR1	AMMECR nuclear protein 1	Q99684	GFI1	growth factor independent 1 transcriptional repressor	Q03060	CREM	cAMP responsive element modulator							Q8NBV8	SYT8	synaptotagmin 8
O15335	CHAD	chondroadherin	P41217	CD200	CD200 molecule	Q96SU4	OSBPL9	oxysterol binding protein like 9	Q9NQ87	HEYL	hes related family bHLH transcription factor with YRPW motif like							Q8N0U4	FAM185A	family with sequence similarity 185 member A
Q8TB36	GDAP1	ganglioside induced differentiation associated protein 1	O75486	SUPT3H	SPT3 homolog, SAGA and STAGA complex component	Q8IWU2	LMTK2	lemur tyrosine kinase 2	P43034	PAFAH1B1	platelet activating factor acetylhydrolase 1b regulatory subunit 1							Q8NEC5	CATSPER1	cation channel sperm associated 1
Q8NH93	OR1L3	olfactory receptor family 1 subfamily L member 3	Q3B726	POLR1F	RNA polymerase I subunit F	Q8IZC4	RTKN2	rhotekin 2	A8MYZ6	FOXO6	forkhead box O6							Q8ND24	RNF214	ring finger protein 214
P28222	HTR1B	5-hydroxytryptamine receptor 1B	O95150	TNFSF15	TNF superfamily member 15	Q6Y288	B3GLCT	beta 3-glucosyltransferase	O95229	ZWINT	ZW10 interacting kinetochore protein							Q2UY09	COL28A1	collagen type XXVIII alpha 1 chain
Q9H0A8	COMMD4	COMM domain containing 4	Q9NRG0	CHRAC1	chromatin accessibility complex subunit 1	P0DP58	LYNX1	Ly6/neurotoxin 1	Q6YP21	KYAT3	kynurenine aminotransferase 3							Q96EV2	RBM33	RNA binding motif protein 33
P35228	NOS2	nitric oxide synthase 2	Q15818	NPTX1	neuronal pentraxin 1	P35749	MYH11	myosin heavy chain 11	Q8N7C0	LRRC52	leucine rich repeat containing 52							Q13572	ITPK1	inositol-tetrakisphosphate 1-kinase
Q96CX6	LRRC58	leucine rich repeat containing 58	Q16594	TAF9	TATA-box binding protein associated factor 9	Q7Z3E1	TIPARP	TCDD inducible poly(ADP-ribose) polymerase	Q5W0B1	OBI1	ORC ubiquitin ligase 1							O94762	RECQL5	RecQ like helicase 5
P12318	FCGR2A	Fc gamma receptor IIa	O60678	PRMT3	protein arginine methyltransferase 3	O60427	FADS1	fatty acid desaturase 1	Q6ISU1	PTCRA	pre T cell antigen receptor alpha							P48382	RFX5	regulatory factor X5
P25024	CXCR1	C-X-C motif chemokine receptor 1	P02746	C1QB	complement C1q B chain	Q8WWY6	MBD3L1	methyl-CpG binding domain protein 3 like 1	P22234	PAICS	phosphoribosylaminoimidazole carboxylase and phosphoribosylaminoimidazolesuccinocarboxamide synthase							P49137	MAPKAPK2	MAPK activated protein kinase 2
Q5VUY2	AADACL4	arylacetamide deacetylase like 4	O43909	EXTL3	exostosin like glycosyltransferase 3	Q9H8G1	ZNF430	zinc finger protein 430	Q8N8A8	FAM169BP	family with sequence similarity 169 member B, pseudogene							Q9UL25	RAB21	RAB21, member RAS oncogene family
Q96P66	GPR101	G protein-coupled receptor 101	Q13823	GNL2	G protein nucleolar 2	Q9NQ35	NRIP3	nuclear receptor interacting protein 3	P15153	RAC2	Rac family small GTPase 2							Q9UII2	ATP5IF1	ATP synthase inhibitory factor subunit 1
Q9GZN2	TGIF2	TGFB induced factor homeobox 2	Q02577	NHLH2	nescient helix-loop-helix 2	P0C7V6	SUPT20HL2	SUPT20H like 2	P23760	PAX3	paired box 3							O95990	FAM107A	family with sequence similarity 107 member A
Q9H6B9	EPHX3	epoxide hydrolase 3	P08708	RPS17	ribosomal protein S17	Q8N9W8	GARIN2	golgi associated RAB2 interactor family member 2	P0DPD7	EEF1AKMT4	EEF1A lysine methyltransferase 4							Q12866	MERTK	MER proto-oncogene, tyrosine kinase
Q3SYG4	BBS9	Bardet-Biedl syndrome 9	Q6DCA0	AMMECR1L	AMMECR1 like	Q6IA69	NADSYN1	NAD synthetase 1	Q9NZB8	MOCS1	molybdenum cofactor synthesis 1							O60909	B4GALT2	beta-1,4-galactosyltransferase 2
Q86X76	NIT1	nitrilase 1	P55769	SNU13	small nuclear ribonucleoprotein 13	P43694	GATA4	GATA binding protein 4	Q86XT9	TMEM219	transmembrane protein 219							P01569	IFNA5	interferon alpha 5
O14682	ENC1	ectodermal-neural cortex 1	A0A1W2PPH5	TAF11L13	TATA-box binding protein associated factor 11 like 13	Q9BT78	COPS4	COP9 signalosome subunit 4	Q96CD2	PPCDC	phosphopantothenoylcysteine decarboxylase							Q9NZR4	VSX1	visual system homeobox 1
Q8NH07	OR11H2	olfactory receptor family 11 subfamily H member 2	Q9HC73	CRLF2	cytokine receptor like factor 2	C9JJH3	USP17L10	ubiquitin specific peptidase 17 like family member 10	O60939	SCN2B	sodium voltage-gated channel beta subunit 2							Q9H094	NBPF3	NBPF member 3
Q9HB96	FANCE	FA complementation group E	Q02413	DSG1	desmoglein 1	O75438	NDUFB1	NADH:ubiquinone oxidoreductase subunit B1	P11912	CD79A	CD79a molecule							P17544	ATF7	activating transcription factor 7
Q16533	SNAPC1	small nuclear RNA activating complex polypeptide 1	Q9Y5G0	PCDHGB5	protocadherin gamma subfamily B, 5	Q96KK3	KCNS1	potassium voltage-gated channel modifier subfamily S member 1	Q9NT22	EMILIN3	elastin microfibril interfacer 3							O95190	OAZ2	ornithine decarboxylase antizyme 2
Q96LU5	IMMP1L	inner mitochondrial membrane peptidase subunit 1	O00567	NOP56	NOP56 ribonucleoprotein	P26715	KLRC1	killer cell lectin like receptor C1	Q6I9Y2	THOC7	THO complex subunit 7							Q8NCB2	CAMKV	CaM kinase like vesicle associated
Q8NH09	OR8S1	olfactory receptor family 8 subfamily S member 1	P31785	IL2RG	interleukin 2 receptor subunit gamma	O95402	MED26	mediator complex subunit 26	A0A1W2PQ72	MSANTD7	Myb/SANT DNA binding domain containing 7							Q13416	ORC2	origin recognition complex subunit 2
Q15722	LTB4R	leukotriene B4 receptor	P49642	PRIM1	DNA primase subunit 1	Q15828	CST6	cystatin E/M	Q9BWW8	APOL6	apolipoprotein L6							P19623	SRM	spermidine synthase
Q02153	GUCY1B1	guanylate cyclase 1 soluble subunit beta 1	Q9UJA3	MCM8	minichromosome maintenance 8 homologous recombination repair factor	Q9H9V4	RNF122	ring finger protein 122	Q9BVG3	TRIM62	tripartite motif containing 62							Q8NB49	ATP11C	ATPase phospholipid transporting 11C
Q9UBE8	NLK	nemo like kinase	Q9UJ99	CDH22	cadherin 22	Q9BSF8	BTBD10	BTB domain containing 10	Q9H6S1	AZI2	5-azacytidine induced 2							Q9BZD2	SLC29A3	solute carrier family 29 member 3
A0A0K0K1A5	TRBV6-5	T cell receptor beta variable 6-5	Q9NR22	PRMT8	protein arginine methyltransferase 8	P33151	CDH5	cadherin 5	Q9H902	REEP1	receptor accessory protein 1							P13498	CYBA	cytochrome b-245 alpha chain
O00322	UPK1A	uroplakin 1A	P61218	POLR2F	RNA polymerase II, I and III subunit F	Q14524	SCN5A	sodium voltage-gated channel alpha subunit 5	P0CW27	CCDC166	coiled-coil domain containing 166							P16520	GNB3	G protein subunit beta 3
P0DN82	OR12D1	olfactory receptor family 12 subfamily D member 1 (gene/pseudogene)	Q9UHV8	LGALS13	galectin 13	Q9ULQ0	STRIP2	striatin interacting protein 2	Q96IZ0	PAWR	pro-apoptotic WT1 regulator							Q9H8K7	PAAT	ATPase PAAT (EC 3.6.1.-) (Protein associated with ABC transporters) (PAAT)
Q9H9A5	CNOT10	CCR4-NOT transcription complex subunit 10	A8MUM7	LGALS16	galectin 16	Q9UJ98	STAG3	STAG3 cohesin complex component	Q9H228	S1PR5	sphingosine-1-phosphate receptor 5							P62913	RPL11	ribosomal protein L11
Q5NUL3	FFAR4	free fatty acid receptor 4	O95147	DUSP14	dual specificity phosphatase 14	O75695	RP2	RP2 activator of ARL3 GTPase	Q9NUM3	SLC39A9	solute carrier family 39 member 9							Q8N8I0	SAMD12	sterile alpha motif domain containing 12
P34932	HSPA4	heat shock protein family A (Hsp70) member 4	Q86SJ6	DSG4	desmoglein 4	Q7Z401	DENND4A	DENN domain containing 4A	Q8IVU9	CABCOCO1	ciliary associated calcium binding coiled-coil 1							Q6DKI7	PVRIG	PVR related immunoglobulin domain containing
Q8NH63	OR51H1	olfactory receptor family 51 subfamily H member 1	Q01973	ROR1	receptor tyrosine kinase like orphan receptor 1	Q8TB73	NDNF	neuron derived neurotrophic factor	O95406	CNIH1	cornichon family AMPA receptor auxiliary protein 1							Q5T5J6	SWT1	SWT1 RNA endoribonuclease homolog
A6NFE3	EFCAB10	EF-hand calcium binding domain 10	Q12962	TAF10	TATA-box binding protein associated factor 10	Q9HA38	ZMAT3	zinc finger matrin-type 3	Q8IWU6	SULF1	sulfatase 1							O14576	DYNC1I1	dynein cytoplasmic 1 intermediate chain 1
Q8NGL1	OR5D18	olfactory receptor family 5 subfamily D member 18	Q5VTU8	ATP5F1EP2	ATP synthase F1 subunit epsilon pseudogene 2	Q15910	EZH2	enhancer of zeste 2 polycomb repressive complex 2 subunit	Q6ZRS4	ITPRID1	ITPR interacting domain containing 1							P12268	IMPDH2	inosine monophosphate dehydrogenase 2
Q4V339	ZNG1F	Zn regulated GTPase metalloprotein activator 1F	A8MQ27	NEURL1B	neuralized E3 ubiquitin protein ligase 1B	P53672	CRYBA2	crystallin beta A2	Q96C10	DHX58	DExH-box helicase 58							A0JD37	TRDV3	T cell receptor delta variable 3
P02778	CXCL10	C-X-C motif chemokine ligand 10	Q6ZTQ4	CDHR3	cadherin related family member 3	P51784	USP11	ubiquitin specific peptidase 11	P23508	MCC	MCC regulator of WNT signaling pathway							Q96SZ6	CDK5RAP1	CDK5 regulatory subunit associated protein 1
Q6UWW0	LCN15	lipocalin 15	Q86VD1	MORC1	MORC family CW-type zinc finger 1	Q70EK8	USP53	ubiquitin specific peptidase 53	Q15415	RBMY1F	RNA binding motif protein Y-linked family 1 member F							Q5J8X5	MS4A13	membrane spanning 4-domains A13
Q969M1	TOMM40L	translocase of outer mitochondrial membrane 40 like	O76050	NEURL1	neuralized E3 ubiquitin protein ligase 1	Q9P2L0	WDR35	WD repeat domain 35	Q9UKJ3	GPATCH8	G-patch domain containing 8							Q8N1N0	CLEC4F	C-type lectin domain family 4 member F
Q96RD0	OR8B2	olfactory receptor family 8 subfamily B member 2	P49005	POLD2	DNA polymerase delta 2, accessory subunit	Q13492	PICALM	phosphatidylinositol binding clathrin assembly protein	Q96AP0	ACD	ACD shelterin complex subunit and telomerase recruitment factor							O60779	SLC19A2	solute carrier family 19 member 2
O95222	OR6A2	olfactory receptor family 6 subfamily A member 2	Q8TD47	RPS4Y2	ribosomal protein S4 Y-linked 2	Q96NZ8	WFIKKN1	WAP, follistatin/kazal, immunoglobulin, kunitz and netrin domain containing 1	Q9UPX6	MINAR1	membrane integral NOTCH2 associated receptor 1							P62308	SNRPG	small nuclear ribonucleoprotein polypeptide G
Q8N608	DPP10	dipeptidyl peptidase like 10	A1A519	FAM170A	family with sequence similarity 170 member A	P25942	CD40	CD40 molecule	Q9UHE5	NAT8	N-acetyltransferase 8 (putative)							Q5VV67	PPRC1	PPARG related coactivator 1
O14626	GPR171	G protein-coupled receptor 171	Q9BUL9	RPP25	ribonuclease P and MRP subunit p25	Q6NXR4	TTI2	TELO2 interacting protein 2	Q9H8H3	METTL7A	Putative methyltransferase-like protein 7A (EC 2.1.1.-) (Protein AAM-B)							P21757	MSR1	macrophage scavenger receptor 1
P19404	NDUFV2	NADH:ubiquinone oxidoreductase core subunit V2	Q8TCG1	CIP2A	cellular inhibitor of PP2A	Q8N584	TTC39C	tetratricopeptide repeat domain 39C	Q9NVC3	SLC38A7	solute carrier family 38 member 7							P54219	SLC18A1	solute carrier family 18 member A1
Q5SVS4	SLC25A30	solute carrier family 25 member 30	P12694	BCKDHA	branched chain keto acid dehydrogenase E1 subunit alpha	Q30KQ8	DEFB112	defensin beta 112	Q8NHU0	CT45A3	cancer/testis antigen family 45 member A3							P31275	HOXC12	homeobox C12
P55085	F2RL1	F2R like trypsin receptor 1	P19320	VCAM1	vascular cell adhesion molecule 1	P50607	TUB	TUB bipartite transcription factor	O95210	STBD1	starch binding domain 1							O43818	RRP9	ribosomal RNA processing 9, U3 small nucleolar RNA binding protein
A6NI28	ARHGAP42	Rho GTPase activating protein 42	Q96SD1	DCLRE1C	DNA cross-link repair 1C	O14753	OVOL1	ovo like transcriptional repressor 1	Q8NBT2	SPC24	SPC24 component of NDC80 kinetochore complex							Q3YBR2	TBRG1	transforming growth factor beta regulator 1
P25101	EDNRA	endothelin receptor type A	P38935	IGHMBP2	immunoglobulin mu DNA binding protein 2	P35573	AGL	amylo-alpha-1, 6-glucosidase, 4-alpha-glucanotransferase	O14936	CASK	calcium/calmodulin dependent serine protein kinase							Q96BR1	SGK3	serum/glucocorticoid regulated kinase family member 3
Q5JSQ8	KHDC1L	KH domain containing 1 like	Q5T686	AVPI1	arginine vasopressin induced 1	A0A0G2JP20	PRAMEF9	PRAME family member 9	P23588	EIF4B	eukaryotic translation initiation factor 4B							O60423	ATP8B3	ATPase phospholipid transporting 8B3
O95977	S1PR4	sphingosine-1-phosphate receptor 4	O75477	ERLIN1	ER lipid raft associated 1	P01893	HLA-H	major histocompatibility complex, class I, H (pseudogene)	Q8NFW9	MYRIP	myosin VIIA and Rab interacting protein							O60391	GRIN3B	glutamate ionotropic receptor NMDA type subunit 3B
Q8NGQ1	OR9G4	olfactory receptor family 9 subfamily G member 4	Q99878	H2AC14	H2A clustered histone 14	Q8N680	ZBTB2	zinc finger and BTB domain containing 2	O75335	PPFIA4	PTPRF interacting protein alpha 4							Q96I36	COX14	cytochrome c oxidase assembly factor COX14
Q9Y6G5	COMMD10	COMM domain containing 10	Q9H0R6	QRSL1	glutaminyl-tRNA amidotransferase subunit QRSL1	Q9H0E7	USP44	ubiquitin specific peptidase 44	O76013	KRT36	keratin 36							O75310	UGT2B11	UDP glucuronosyltransferase family 2 member B11
Q86V21	AACS	acetoacetyl-CoA synthetase	O60262	GNG7	G protein subunit gamma 7	Q658Y4	FAM91A1	family with sequence similarity 91 member A1	Q96QE2	SLC2A13	solute carrier family 2 member 13							P30533	LRPAP1	LDL receptor related protein associated protein 1
Q99536	VAT1	vesicle amine transport 1	O15146	MUSK	muscle associated receptor tyrosine kinase	P27701	CD82	CD82 molecule	Q9NP90	RAB9B	RAB9B, member RAS oncogene family							P62995	TRA2B	transformer 2 beta homolog
A8MXD5	GRXCR1	glutaredoxin and cysteine rich domain containing 1	P62891	RPL39	ribosomal protein L39	Q8N1F8	STK11IP	serine/threonine kinase 11 interacting protein	O15213	WDR46	WD repeat domain 46							A0A075B6R9	IGKV2D-24	immunoglobulin kappa variable 2D-24 (non-functional)
Q9UBS0	RPS6KB2	ribosomal protein S6 kinase B2	Q9BYJ4	TRIM34	tripartite motif containing 34	P26447	S100A4	S100 calcium binding protein A4	P55040	GEM	GTP binding protein overexpressed in skeletal muscle							O00746	NME4	NME/NM23 nucleoside diphosphate kinase 4
Q9Y679	AUP1	AUP1 lipid droplet regulating VLDL assembly factor	P35916	FLT4	fms related receptor tyrosine kinase 4	Q6ZTB9	ZNF833P	zinc finger protein 833, pseudogene	Q9HBR0	SLC38A10	solute carrier family 38 member 10							Q9UN37	VPS4A	vacuolar protein sorting 4 homolog A
Q7KZI7	MARK2	microtubule affinity regulating kinase 2	P42694	HELZ	helicase with zinc finger	Q17R89	ARHGAP44	Rho GTPase activating protein 44	Q9H4B0	OSGEPL1	O-sialoglycoprotein endopeptidase like 1							Q6P2H8	TMEM53	transmembrane protein 53
Q86X29	LSR	lipolysis stimulated lipoprotein receptor	P62495	ETF1	eukaryotic translation termination factor 1	Q7Z3S9	NOTCH2NLA	notch 2 N-terminal like A	Q9Y3M2	CBY1	chibby 1, beta catenin antagonist							Q8NBT0	POC1A	POC1 centriolar protein A
P04201	MAS1	MAS1 proto-oncogene, G protein-coupled receptor	Q9ULC4	MCTS1	MCTS1 re-initiation and release factor	Q9Y282	ERGIC3	ERGIC and golgi 3	Q96BP3	PPWD1	peptidylprolyl isomerase domain and WD repeat containing 1							P04216	THY1	Thy-1 cell surface antigen
P03951	F11	coagulation factor XI	Q9Y264	ANGPT4	angiopoietin 4	A6NP61	ZAR1L	zygote arrest 1 like	P11926	ODC1	ornithine decarboxylase 1							Q8TDY3	ACTRT2	actin related protein T2
Q9H6U8	ALG9	ALG9 alpha-1,2-mannosyltransferase	P08567	PLEK	pleckstrin	Q8NCA9	ZNF784	zinc finger protein 784	Q8WVE0	EEF1AKMT1	EEF1A lysine methyltransferase 1							O14957	UQCR11	ubiquinol-cytochrome c reductase, complex III subunit XI
Q9UGV2	NDRG3	NDRG family member 3	P15260	IFNGR1	interferon gamma receptor 1	Q9ULT8	HECTD1	HECT domain E3 ubiquitin protein ligase 1	Q5VXT5	SYPL2	synaptophysin like 2							P83369	LSM11	LSM11, U7 small nuclear RNA associated
Q8NGF4	OR5AP2	olfactory receptor family 5 subfamily AP member 2	Q9Y5I2	PCDHA10	protocadherin alpha 10	P05112	IL4	interleukin 4	Q5T7P8	SYT6	synaptotagmin 6							Q6UUV7	CRTC3	CREB regulated transcription coactivator 3
P55210	CASP7	caspase 7	P49917	LIG4	DNA ligase 4	O43791	SPOP	speckle type BTB/POZ protein	Q9P0K8	FOXJ2	forkhead box J2							A0A0C4DH90	IGKV3OR2-268	immunoglobulin kappa variable 3/OR2-268 (non-functional)
Q8N0Y5	OR8I2	olfactory receptor family 8 subfamily I member 2	Q6ICL3	TANGO2	transport and golgi organization 2 homolog	Q9H6E4	CCDC134	coiled-coil domain containing 134	P40198	CEACAM3	CEA cell adhesion molecule 3							P26374	CHML	CHM like Rab escort protein
P01588	EPO	erythropoietin	Q9Y616	IRAK3	interleukin 1 receptor associated kinase 3	A6NKB5	PCNX2	pecanex 2	Q92574	TSC1	TSC complex subunit 1							Q96LB4	ATP6V1G3	ATPase H+ transporting V1 subunit G3
Q5VSP4	LCN1P1	lipocalin 1 pseudogene 1	Q6QAJ8	TMEM220	transmembrane protein 220	Q8WWA0	ITLN1	intelectin 1	A0A1W2PR48	TLE7	TLE family member 7							A0A0G2JNQ3	HNRNPCL2	heterogeneous nuclear ribonucleoprotein C like 2
Q8N661	TMEM86B	transmembrane protein 86B	Q9BV20	MRI1	methylthioribose-1-phosphate isomerase 1	O15321	TM9SF1	transmembrane 9 superfamily member 1	Q9UM01	SLC7A7	solute carrier family 7 member 7							Q9NWU5	MRPL22	mitochondrial ribosomal protein L22
O76099	OR7C1	olfactory receptor family 7 subfamily C member 1	P56470	LGALS4	galectin 4	Q5BKX5	C19orf54	UPF0692 protein C19orf54	P09629	HOXB7	homeobox B7							Q0VGL1	LAMTOR4	late endosomal/lysosomal adaptor, MAPK and MTOR activator 4
Q86V97	KBTBD6	kelch repeat and BTB domain containing 6	P61247	RPS3A	ribosomal protein S3A	Q99835	SMO	smoothened, frizzled class receptor	P06753	TPM3	tropomyosin 3							Q9UQB8	BAIAP2	BAR/IMD domain containing adaptor protein 2
Q92954	PRG4	proteoglycan 4	Q6ZVW7	IL17REL	interleukin 17 receptor E like	P21291	CSRP1	cysteine and glycine rich protein 1	Q6EIG7	CLEC6A	C-type lectin domain containing 6A							Q4LEZ3	AARD	alanine and arginine rich domain containing protein
P55212	CASP6	caspase 6	Q9UL18	AGO1	argonaute RISC component 1	Q9Y6R4	MAP3K4	mitogen-activated protein kinase kinase kinase 4	Q3KR37	GRAMD1B	GRAM domain containing 1B							Q8IXQ5	KLHL7	kelch like family member 7
O43813	LANCL1	LanC like glutathione S-transferase 1	P32927	CSF2RB	colony stimulating factor 2 receptor subunit beta	Q9C0C9	UBE2O	ubiquitin conjugating enzyme E2 O	Q8NHH9	ATL2	atlastin GTPase 2							O60469	DSCAM	DS cell adhesion molecule
Q9BZ19	ANKRD60	ankyrin repeat domain 60	Q71UI9	H2AZ2	H2A.Z variant histone 2	Q8NC26	ZNF114	zinc finger protein 114	Q8WWZ4	ABCA10	ATP binding cassette subfamily A member 10							Q15393	SF3B3	splicing factor 3b subunit 3
O95259	KCNH1	potassium voltage-gated channel subfamily H member 1	A0A2R8Y619	H2BK1	H2B.K variant histone 1	O14638	ENPP3	ectonucleotide pyrophosphatase/phosphodiesterase 3	P07951	TPM2	tropomyosin 2							Q9UKA8	RCAN3	RCAN family member 3
Q5T7W7	TSTD2	thiosulfate sulfurtransferase like domain containing 2	Q9Y6A4	CFAP20	cilia and flagella associated protein 20	P23470	PTPRG	protein tyrosine phosphatase receptor type G	P31277	HOXD11	homeobox D11							P42263	GRIA3	glutamate ionotropic receptor AMPA type subunit 3
Q14689	DIP2A	disco interacting protein 2 homolog A	Q9UPR0	PLCL2	phospholipase C like 2	Q6UY01	LRRC31	leucine rich repeat containing 31	Q16204	CCDC6	coiled-coil domain containing 6							P16885	PLCG2	phospholipase C gamma 2
Q5T440	IBA57	iron-sulfur cluster assembly factor IBA57	P48444	ARCN1	archain 1	O95185	UNC5C	unc-5 netrin receptor C	Q8TEP8	CEP192	centrosomal protein 192							P0DMR1	HNRNPCL4	heterogeneous nuclear ribonucleoprotein C like 4
Q92597	NDRG1	N-myc downstream regulated 1	Q8WYL5	SSH1	slingshot protein phosphatase 1	Q15526	SURF1	SURF1 cytochrome c oxidase assembly factor	Q13469	NFATC2	nuclear factor of activated T cells 2							Q8IV32	CCDC71	coiled-coil domain containing 71
O43715	TRIAP1	TP53 regulated inhibitor of apoptosis 1	A0A0G2JPB7	BTNL2	butyrophilin like 2	Q9H7R5	ZNF665	zinc finger protein 665	Q99853	FOXB1	forkhead box B1							Q5VZB9	DMRTA1	DMRT like family A1
Q15612	OR1Q1	olfactory receptor family 1 subfamily Q member 1	P33778	H2BC3	H2B clustered histone 3	P63211	GNGT1	G protein subunit gamma transducin 1	Q14576	ELAVL3	ELAV like RNA binding protein 3							Q147X3	NAA30	N-alpha-acetyltransferase 30, NatC catalytic subunit
Q53EV4	LRRC23	leucine rich repeat containing 23	Q9HAT1	LMAN1L	lectin, mannose binding 1 like	Q9Y575	ASB3	ankyrin repeat and SOCS box containing 3	P98177	FOXO4	forkhead box O4							P04629	NTRK1	neurotrophic receptor tyrosine kinase 1
A6NCV1	OR6C74	olfactory receptor family 6 subfamily C member 74	P38484	IFNGR2	interferon gamma receptor 2	Q53RD9	FBLN7	fibulin 7	Q5BKX6	SLC45A4	solute carrier family 45 member 4							Q49MG5	MAP9	microtubule associated protein 9
Q8WWB5	PIH1D2	PIH1 domain containing 2	Q9Y5H7	PCDHA5	protocadherin alpha 5	Q96BQ1	FAM3D	FAM3 metabolism regulating signaling molecule D	Q5HY92	FIGN	fidgetin, microtubule severing factor							Q8TBR7	TLCD3A	TLC domain containing 3A
P08195	SLC3A2	solute carrier family 3 member 2	Q16695	H3-4	H3.4 histone, cluster member	Q14765	STAT4	signal transducer and activator of transcription 4	Q9H1B4	NXF5	nuclear RNA export factor 5							Q6ZVE7	GOLT1A	golgi transport 1A
Q16602	CALCRL	calcitonin receptor like receptor	O15553	MEFV	MEFV innate immunity regulator, pyrin	O43182	ARHGAP6	Rho GTPase activating protein 6	Q8NEX9	SDR9C7	short chain dehydrogenase/reductase family 9C member 7							Q96GD4	AURKB	aurora kinase B
Q8IV20	LACC1	laccase domain containing 1	Q16514	TAF12	TATA-box binding protein associated factor 12	O94989	ARHGEF15	Rho guanine nucleotide exchange factor 15	Q7Z353	HDX	highly divergent homeobox							P69891	HBG1	hemoglobin subunit gamma 1
P46089	GPR3	G protein-coupled receptor 3	P02745	C1QA	complement C1q A chain	P60604	UBE2G2	ubiquitin conjugating enzyme E2 G2	P58304	VSX2	visual system homeobox 2							Q6A162	KRT40	keratin 40
P01742	IGHV1-69	immunoglobulin heavy variable 1-69	P06493	CDK1	cyclin dependent kinase 1	Q9C0K0	BCL11B	BCL11 transcription factor B	Q86UD5	SLC9B2	solute carrier family 9 member B2							Q15365	PCBP1	poly(rC) binding protein 1
O00584	RNASET2	ribonuclease T2	Q9Y5G8	PCDHGA5	protocadherin gamma subfamily A, 5	Q07326	PIGF	phosphatidylinositol glycan anchor biosynthesis class F	Q8NHY2	COP1	COP1 E3 ubiquitin ligase							A0A7I2V3D3
Q16513	PKN2	protein kinase N2	A8MT69	CENPX	centromere protein X	Q8WZ73	RFFL	ring finger and FYVE like domain containing E3 ubiquitin protein ligase	Q9H7F0	ATP13A3	ATPase 13A3							O43678	NDUFA2	NADH:ubiquinone oxidoreductase subunit A2
Q8N945	PRELID2	PRELI domain containing 2	P13726	F3	coagulation factor III, tissue factor	Q13886	KLF9	KLF transcription factor 9	O60361	NME2P1	NME2 pseudogene 1							Q01581	HMGCS1	3-hydroxy-3-methylglutaryl-CoA synthase 1
P46940	IQGAP1	IQ motif containing GTPase activating protein 1	Q0VG99	MESP2	mesoderm posterior bHLH transcription factor 2	Q5TCH4	CYP4A22	cytochrome P450 family 4 subfamily A member 22	O00505	KPNA3	karyopherin subunit alpha 3							Q58F21	BRDT	bromodomain testis associated
P48454	PPP3CC	protein phosphatase 3 catalytic subunit gamma	Q9H467	CUEDC2	CUE domain containing 2	Q9BRC7	PLCD4	phospholipase C delta 4	Q8TC12	RDH11	retinol dehydrogenase 11							Q9ULJ1	ODF2L	outer dense fiber of sperm tails 2 like
Q8WVB3	HEXD	hexosaminidase D	P50148	GNAQ	G protein subunit alpha q	P70210	Tead3	Transcriptional enhancer factor TEF-5 (DTEF-1) (ETF-related factor 1) (ETFR-1) (TEA domain family member 3) (TEAD-3)	Q9H0H3	KLHL25	kelch like family member 25							Q8IUN9	CLEC10A	C-type lectin domain containing 10A
Q8NH72	OR4C6	olfactory receptor family 4 subfamily C member 6	Q14213	EBI3	Epstein-Barr virus induced 3	Q9Y258	CCL26	C-C motif chemokine ligand 26	Q6PD74	AAGAB	alpha and gamma adaptin binding protein							P08134	RHOC	ras homolog family member C
P09871	C1S	complement C1s	Q7RTT5	SSX7	SSX family member 7	P23610	F8A1	coagulation factor VIII associated 1	Q5T013	HYI	hydroxypyruvate isomerase (putative)							Q9P031	CCDC59	coiled-coil domain containing 59
P49588	AARS1	alanyl-tRNA synthetase 1	Q99598	TSNAX	translin associated factor X	Q9UIH9	KLF15	KLF transcription factor 15	Q8NA47	CCDC63	coiled-coil domain containing 63							Q9NQL9	DMRT3	doublesex and mab-3 related transcription factor 3
Q8WUE5	CT55	cancer/testis antigen 55	O43462	MBTPS2	membrane bound transcription factor peptidase, site 2	A6NK53	ZNF233	zinc finger protein 233	Q9NVT9	ARMC1	armadillo repeat containing 1							P31314	TLX1	T cell leukemia homeobox 1
Q96SB4	SRPK1	SRSF protein kinase 1	Q92530	PSMF1	proteasome inhibitor subunit 1	Q86SK9	SCD5	stearoyl-CoA desaturase 5	Q16473	TNXA	tenascin XA (pseudogene)							P51795	CLCN5	chloride voltage-gated channel 5
Q15077	P2RY6	pyrimidinergic receptor P2Y6	Q93077	H2AC6	H2A clustered histone 6	P16112	ACAN	aggrecan	Q9UPV9	TRAK1	trafficking kinesin protein 1							Q9HBH9	MKNK2	MAPK interacting serine/threonine kinase 2
Q86VD9	PIGZ	phosphatidylinositol glycan anchor biosynthesis class Z	Q9ULB5	CDH7	cadherin 7	Q8IWZ4	TRIM48	tripartite motif containing 48	P18074	ERCC2	ERCC excision repair 2, TFIIH core complex helicase subunit							P50336	PPOX	protoporphyrinogen oxidase
Q5FYB1	ARSI	arylsulfatase family member I	Q8WUK0	PTPMT1	protein tyrosine phosphatase mitochondrial 1	P22681	CBL	Cbl proto-oncogene	Q9NY93	DDX56	DEAD-box helicase 56							O95661	DIRAS3	DIRAS family GTPase 3
Q9UQ26	RIMS2	regulating synaptic membrane exocytosis 2	P0C0S5	H2AZ1	H2A.Z variant histone 1	Q13542	EIF4EBP2	eukaryotic translation initiation factor 4E binding protein 2	P78368	CSNK1G2	casein kinase 1 gamma 2							P23510	TNFSF4	TNF superfamily member 4
Q9NZD1	GPRC5D	G protein-coupled receptor class C group 5 member D	O75952	CABYR	calcium binding tyrosine phosphorylation regulated	P43365	MAGEA12	MAGE family member A12	Q9Y5E9	PCDHB14	protocadherin beta 14							Q17RP2	TIGD6	tigger transposable element derived 6
Q8NFL0	B3GNT7	UDP-GlcNAc:betaGal beta-1,3-N-acetylglucosaminyltransferase 7	Q93096	PTP4A1	protein tyrosine phosphatase 4A1	Q8NDX1	PSD4	pleckstrin and Sec7 domain containing 4	Q96HP4	OXNAD1	oxidoreductase NAD binding domain containing 1							Q8N350	CBARP	CACN subunit beta associated regulatory protein
Q9H425	C1orf198	chromosome 1 open reading frame 198	A4GXA9	EME2	essential meiotic structure-specific endonuclease subunit 2	Q92543	SNX19	sorting nexin 19	Q00577	PURA	purine rich element binding protein A							A0A494C0I6		Secreted protein
P04040	CAT	catalase	Q8WWY3	PRPF31	pre-mRNA processing factor 31	P57087	JAM2	junctional adhesion molecule 2	Q9UN81	L1RE1	LINE-1 retrotransposable element ORF1 protein (L1ORF1p) (LINE retrotransposable element 1) (LINE1 retrotransposable element 1)							P48066	SLC6A11	solute carrier family 6 member 11
Q58G82	SYT14P1	synaptotagmin 14 pseudogene 1	Q92901	RPL3L	ribosomal protein L3 like	Q7Z3B1	NEGR1	neuronal growth regulator 1	A8MWD9	SNRPGP15	small nuclear ribonucleoprotein polypeptide G pseudogene 15							Q96IW7	SEC22A	SEC22 homolog A, vesicle trafficking protein
Q9NRD5	PICK1	protein interacting with PRKCA 1	Q96MU7	YTHDC1	YTH N6-methyladenosine RNA binding protein C1	P56539	CAV3	caveolin 3	Q5I0X7	TTC32	tetratricopeptide repeat domain 32							P68871	HBB	hemoglobin subunit beta
Q9GZQ3	COMMD5	COMM domain containing 5	Q9HB19	PLEKHA2	pleckstrin homology domain containing A2	Q2MJR0	SPRED3	sprouty related EVH1 domain containing 3	Q6P9F5	TRIM40	tripartite motif containing 40							O60499	STX10	syntaxin 10
Q9H207	OR10A5	olfactory receptor family 10 subfamily A member 5	Q9NQ86	TRIM36	tripartite motif containing 36	P55289	CDH12	cadherin 12	O76014	KRT37	keratin 37							A0A075B6H7	IGKV3-7	immunoglobulin kappa variable 3-7 (non-functional)
O75764	TCEA3	transcription elongation factor A3	Q86WX3	RPS19BP1	ribosomal protein S19 binding protein 1	Q99748	NRTN	neurturin	Q8N699	MYCT1	MYC target 1							Q9H1A3	METTL9	methyltransferase 9, His-X-His N1(pi)-histidine
P42658	DPP6	dipeptidyl peptidase like 6	Q96RT7	TUBGCP6	tubulin gamma complex component 6	Q8N983	MRPL43	mitochondrial ribosomal protein L43	A8MT33	SYCE1L	synaptonemal complex central element protein 1 like							Q86VP1	TAX1BP1	Tax1 binding protein 1
Q96RJ0	TAAR1	trace amine associated receptor 1	Q5VZP5	STYXL2	serine/threonine/tyrosine interacting like 2	Q9H112	CST11	cystatin 11	Q5VVM6	CCDC30	coiled-coil domain containing 30							O14558	HSPB6	heat shock protein family B (small) member 6
O00254	F2RL2	coagulation factor II thrombin receptor like 2	Q6B8I1	DUSP13	Dual specificity protein phosphatase 13 isoform A (DUSP13A) (EC 3.1.3.16) (EC 3.1.3.48) (Branching-enzyme interacting DSP) (Muscle-restricted DSP) (MDSP)	Q9H694	BICC1	BicC family RNA binding protein 1	Q9NQG5	RPRD1B	regulation of nuclear pre-mRNA domain containing 1B							Q9P246	STIM2	stromal interaction molecule 2
Q5VUY0	AADACL3	arylacetamide deacetylase like 3	Q96HH6	TMEM19	transmembrane protein 19	Q9Y3T9	NOC2L	NOC2 like nucleolar associated transcriptional repressor	Q9UQB9	AURKC	aurora kinase C							P48764	SLC9A3	solute carrier family 9 member A3
P22612	PRKACG	protein kinase cAMP-activated catalytic subunit gamma	Q8IX01	SUGP2	SURP and G-patch domain containing 2	P0DMB1	PRR23D2	proline rich 23 domain containing 2	Q9Y5S1	TRPV2	transient receptor potential cation channel subfamily V member 2							Q59EK9	RUNDC3A	RUN domain containing 3A
Q9HAS3	SLC28A3	solute carrier family 28 member 3	Q6DKI1	RPL7L1	ribosomal protein L7 like 1	P01178	OXT	oxytocin/neurophysin I prepropeptide	Q6P4F1	FUT10	fucosyltransferase 10							Q9NY26	SLC39A1	solute carrier family 39 member 1
Q8NHR7	TERB2	telomere repeat binding bouquet formation protein 2	O14841	OPLAH	5-oxoprolinase, ATP-hydrolysing	P20807	CAPN3	calpain 3	Q8N6R0	METTL13	methyltransferase 13, eEF1A N-terminus and K55							Q86U06	RBM23	RNA binding motif protein 23
P19961	AMY2B	amylase alpha 2B	Q3SY89			Q6ZN08	ZNF66	zinc finger protein 66	Q9BRL6	SRSF8	serine and arginine rich splicing factor 8							Q9C040	TRIM2	tripartite motif containing 2
A0A0K0K1E9	TRBV7-7	T cell receptor beta variable 7-7	B2RNN3	C1QTNF9B	C1q and TNF related 9B	Q8IY92	SLX4	SLX4 structure-specific endonuclease subunit	Q9UIC8	LCMT1	leucine carboxyl methyltransferase 1							Q9Y275	TNFSF13B	TNF superfamily member 13b
Q16538	GPR162	G protein-coupled receptor 162	P61513	RPL37A	ribosomal protein L37a	Q9NX05	FAM120C	family with sequence similarity 120 member C	Q86SE8	NPM2	nucleophosmin/nucleoplasmin 2							E7EU14
Q5BKT4	ALG10	ALG10 alpha-1,2-glucosyltransferase	Q15121	PEA15	proliferation and apoptosis adaptor protein 15	A1L4H1	SSC5D	scavenger receptor cysteine rich family member with 5 domains	Q8IYE1	CCDC13	coiled-coil domain containing 13							Q8TCU6	PREX1	phosphatidylinositol-3,4,5-trisphosphate dependent Rac exchange factor 1
Q8WXX5	DNAJC9	DnaJ heat shock protein family (Hsp40) member C9	Q86Y39	NDUFA11	NADH:ubiquinone oxidoreductase subunit A11	Q495Y8	SPDYE2	speedy/RINGO cell cycle regulator family member E2	Q9HC77	CENPJ	centromere protein J							P08631	HCK	HCK proto-oncogene, Src family tyrosine kinase
P07900	HSP90AA1	heat shock protein 90 alpha family class A member 1	Q9BWJ5	SF3B5	splicing factor 3b subunit 5	P23469	PTPRE	protein tyrosine phosphatase receptor type E	Q9C0C7	AMBRA1	autophagy and beclin 1 regulator 1							Q9H6K1	ILRUN	inflammation and lipid regulator with UBA-like and NBR1-like domains
Q8NFA2	NOXO1	NADPH oxidase organizer 1	Q9Y5E4	PCDHB5	protocadherin beta 5	Q96RV3	PCNX1	pecanex 1	O43283	MAP3K13	mitogen-activated protein kinase kinase kinase 13							P01602	IGKV1-5	immunoglobulin kappa variable 1-5
Q9H488	POFUT1	protein O-fucosyltransferase 1	P50151	GNG10	G protein subunit gamma 10	Q6UWN8	SPINK6	serine peptidase inhibitor Kazal type 6	P21281	ATP6V1B2	ATPase H+ transporting V1 subunit B2							Q9H8W3	FAM204A	family with sequence similarity 204 member A
P25103	TACR1	tachykinin receptor 1	Q9NPG4	PCDH12	protocadherin 12	O94810	RGS11	regulator of G protein signaling 11	O14717	TRDMT1	tRNA aspartic acid methyltransferase 1							Q8IVT5	KSR1	kinase suppressor of ras 1
P29377	S100G	S100 calcium binding protein G	Q13634	CDH18	cadherin 18	Q9NP60	IL1RAPL2	interleukin 1 receptor accessory protein like 2	Q96QS3	ARX	aristaless related homeobox							P61026	RAB10	RAB10, member RAS oncogene family
Q9BPW8	NIPSNAP1	nipsnap homolog 1	P62277	RPS13	ribosomal protein S13	Q99942	RNF5	ring finger protein 5	Q8N0V4	LGI2	leucine rich repeat LGI family member 2							O75398	DEAF1	DEAF1 transcription factor
P40939	HADHA	hydroxyacyl-CoA dehydrogenase trifunctional multienzyme complex subunit alpha	Q6PKX4	DOK6	docking protein 6	O95626	ANP32D	acidic nuclear phosphoprotein 32 family member D	Q9UQ16	DNM3	dynamin 3							Q06830	PRDX1	peroxiredoxin 1
A6NMZ7	COL6A6	collagen type VI alpha 6 chain	Q9HD90	NEUROD4	neuronal differentiation 4	Q9Y248	GINS2	GINS complex subunit 2	Q9H7E9	C8orf33	chromosome 8 open reading frame 33							P37268	FDFT1	farnesyl-diphosphate farnesyltransferase 1
Q9NQQ7	SLC35C2	solute carrier family 35 member C2	O60814	H2BC12	H2B clustered histone 12	A7KAX9	ARHGAP32	Rho GTPase activating protein 32	Q9UMS6	SYNPO2	synaptopodin 2							P57772	EEFSEC	eukaryotic elongation factor, selenocysteine-tRNA specific
Q9NQ84	GPRC5C	G protein-coupled receptor class C group 5 member C	Q9HBT6	CDH20	cadherin 20	O43866	CD5L	CD5 molecule like	Q9P1A6	DLGAP2	DLG associated protein 2							Q9H4B7	TUBB1	tubulin beta 1 class VI
P13284	IFI30	IFI30 lysosomal thiol reductase	Q9UN66	PCDHB8	protocadherin beta 8	P06729	CD2	CD2 molecule	P0DP08	IGHV4-38-2	immunoglobulin heavy variable 4-38-2							Q8TCU3	SLC7A13	solute carrier family 7 member 13
P0DP01	IGHV1-8	immunoglobulin heavy variable 1-8	Q8IYT8	ULK2	unc-51 like autophagy activating kinase 2	Q8WXH5	SOCS4	suppressor of cytokine signaling 4	Q6P5R6	RPL22L1	ribosomal protein L22 like 1							Q6ZV65	FAM47E	family with sequence similarity 47 member E
A0A0J9YWU9		Ig-like domain-containing protein	Q99619	SPSB2	splA/ryanodine receptor domain and SOCS box containing 2	Q8NBN3	TMEM87A	transmembrane protein 87A	Q9NXJ5	PGPEP1	pyroglutamyl-peptidase I							Q8TAI7	RHEBL1	RHEB like 1
Q03135	CAV1	caveolin 1	P13942	COL11A2	collagen type XI alpha 2 chain	Q8IYX1	TBC1D21	TBC1 domain family member 21	Q14680	MELK	maternal embryonic leucine zipper kinase							Q9BVT8	TMUB1	transmembrane and ubiquitin like domain containing 1
Q8NGF6	OR10W1	olfactory receptor family 10 subfamily W member 1	Q5T8D3	ACBD5	acyl-CoA binding domain containing 5	P05997	COL5A2	collagen type V alpha 2 chain	P29558	RBMS1	RNA binding motif single stranded interacting protein 1							Q7Z3H4	SAMD7	sterile alpha motif domain containing 7
Q8NGR5	OR1L4	olfactory receptor family 1 subfamily L member 4	Q9UKP3	ITGB1BP2	integrin subunit beta 1 binding protein 2	P51164	ATP4B	ATPase H+/K+ transporting subunit beta	P0DM63	NPIPA8	nuclear pore complex interacting protein family member A8							O43639	NCK2	NCK adaptor protein 2
Q96RD7	PANX1	pannexin 1	Q9Y5H8	PCDHA3	protocadherin alpha 3	Q9H2S1	KCNN2	potassium calcium-activated channel subfamily N member 2	Q13148	TARDBP	TAR DNA binding protein							P31749	AKT1	AKT serine/threonine kinase 1
Q14032	BAAT	bile acid-CoA:amino acid N-acyltransferase	P49916	LIG3	DNA ligase 3	Q8NC01	CLEC1A	C-type lectin domain family 1 member A	Q96JN2	CCDC136	coiled-coil domain containing 136							Q96DH6	MSI2	musashi RNA binding protein 2
Q9H3D4	TP63	tumor protein p63	P32780	GTF2H1	general transcription factor IIH subunit 1	P52747	ZNF143	zinc finger protein 143	Q6P597	KLC3	kinesin light chain 3							O43825	B3GALT2	beta-1,3-galactosyltransferase 2
A0A075B6J1	IGLV5-37	immunoglobulin lambda variable 5-37	P56381	ATP5F1E	ATP synthase F1 subunit epsilon	Q6ZP82	CCDC141	coiled-coil domain containing 141	P10398	ARAF	A-Raf proto-oncogene, serine/threonine kinase							Q5T1V6	DDX59	DEAD-box helicase 59
Q9NZU1	FLRT1	fibronectin leucine rich transmembrane protein 1	Q9H2K2	TNKS2	tankyrase 2	P35443	THBS4	thrombospondin 4	O95644	NFATC1	nuclear factor of activated T cells 1							P0CG04	IGLC1	immunoglobulin lambda constant 1
Q6IF99	OR10K2	olfactory receptor family 10 subfamily K member 2	O75365	PTP4A3	protein tyrosine phosphatase 4A3	O95388	CCN4	cellular communication network factor 4	P63261	ACTG1	actin gamma 1							Q16099	GRIK4	glutamate ionotropic receptor kainate type subunit 4
Q96GS6	ABHD17A	abhydrolase domain containing 17A, depalmitoylase	Q13813	SPTAN1	spectrin alpha, non-erythrocytic 1	Q08AG5	ZNF844	zinc finger protein 844	Q7L014	DDX46	DEAD-box helicase 46							Q8WXH6	RAB40A	RAB40A, member RAS oncogene family
Q8WYQ5	DGCR8	DGCR8 microprocessor complex subunit	Q13410	BTN1A1	butyrophilin subfamily 1 member A1	P18510	IL1RN	interleukin 1 receptor antagonist	Q96A99	PTX4	pentraxin 4							Q86VE3	SATL1	spermidine/spermine N1-acetyl transferase like 1
Q92625	ANKS1A	ankyrin repeat and sterile alpha motif domain containing 1A	Q9BWD3	RTL8A	retrotransposon Gag like 8A	Q8IWX8	CHERP	calcium homeostasis endoplasmic reticulum protein	Q8IVL1	NAV2	neuron navigator 2							Q5T1M5	FKBP15	FKBP prolyl isomerase family member 15
Q6PEY0	GJB7	gap junction protein beta 7	O75385	ULK1	unc-51 like autophagy activating kinase 1	Q8TD43	TRPM4	transient receptor potential cation channel subfamily M member 4	P17482	HOXB9	homeobox B9							Q99973	TEP1	telomerase associated protein 1
P40426	PBX3	PBX homeobox 3	Q8WWW8	GAB3	GRB2 associated binding protein 3	Q96KK5	H2AC12	H2A clustered histone 12	O95477	ABCA1	ATP binding cassette subfamily A member 1							Q9H422	HIPK3	homeodomain interacting protein kinase 3
Q9BUX1	CHAC1	ChaC glutathione specific gamma-glutamylcyclotransferase 1	O95278	EPM2A	EPM2A glucan phosphatase, laforin	A6NH11	GLTPD2	glycolipid transfer protein domain containing 2	Q9UFE4	CCDC39	coiled-coil domain containing 39							Q5BKU9	OXLD1	oxidoreductase like domain containing 1
Q9H255	OR51E2	olfactory receptor family 51 subfamily E member 2	Q969H6	POP5	POP5 homolog, ribonuclease P/MRP subunit	Q8IUH8	SPPL2C	signal peptide peptidase like 2C	P78330	PSPH	phosphoserine phosphatase							O75578	ITGA10	integrin subunit alpha 10
Q96KS0	EGLN2	egl-9 family hypoxia inducible factor 2	Q8NEZ5	FBXO22	F-box protein 22	Q9BZR8	BCL2L14	BCL2 like 14	Q53HC9	EIPR1	EARP complex and GARP complex interacting protein 1							Q7RTS3	PTF1A	pancreas associated transcription factor 1a
Q9P1P5	TAAR2	trace amine associated receptor 2	Q6UX41	BTNL8	butyrophilin like 8	Q6ZN79	ZNF705A	zinc finger protein 705A	Q99436	PSMB7	proteasome 20S subunit beta 7							Q9H7X7	IFT22	intraflagellar transport 22
Q9NUW8	TDP1	tyrosyl-DNA phosphodiesterase 1	Q9Y5F3	PCDHB1	protocadherin beta 1	P0DPK4	NOTCH2NLC	notch 2 N-terminal like C	Q9Y5Z9	UBIAD1	UbiA prenyltransferase domain containing 1							P42261	GRIA1	glutamate ionotropic receptor AMPA type subunit 1
Q96HI0	SENP5	SUMO specific peptidase 5	Q3ZCW2	LGALSL	galectin like	Q70CQ4	USP31	ubiquitin specific peptidase 31	Q14847	LASP1	LIM and SH3 protein 1							A0A0M3HER8	GOLGA6L10	golgin A6 family like 10
Q8NGK4	OR52K1	olfactory receptor family 52 subfamily K member 1	P32004	L1CAM	L1 cell adhesion molecule	Q8IXH7	NELFCD	negative elongation factor complex member C/D	Q8IV42	PSTK	phosphoseryl-tRNA kinase							P05091	ALDH2	aldehyde dehydrogenase 2 family member
Q96A54	ADIPOR1	adiponectin receptor 1	Q9UGI9	PRKAG3	protein kinase AMP-activated non-catalytic subunit gamma 3	Q8TE58	ADAMTS15	ADAM metallopeptidase with thrombospondin type 1 motif 15	A8MZ36	EVPLL	envoplakin like							Q3BBV0	NBPF1	NBPF member 1
P43116	PTGER2	prostaglandin E receptor 2	Q99879	H2BC14	H2B clustered histone 14	Q9Y2M0	FAN1	FANCD2 and FANCI associated nuclease 1	O14974	PPP1R12A	protein phosphatase 1 regulatory subunit 12A							Q14BN4	SLMAP	sarcolemma associated protein
Q9P258	RCC2	regulator of chromosome condensation 2	Q99437	ATP6V0B	ATPase H+ transporting V0 subunit b	P56270	MAZ	MYC associated zinc finger protein	Q9Y615	ACTL7A	actin like 7A							Q9BQ67	GRWD1	glutamate rich WD repeat containing 1
Q8NBL3	TMEM178A	transmembrane protein 178A	Q92989	CLP1	cleavage factor polyribonucleotide kinase subunit 1	P0CJ89	DUX4L6	double homeobox 4 like 6 (pseudogene)	Q9Y644	RFNG	RFNG O-fucosylpeptide 3-beta-N-acetylglucosaminyltransferase							Q9P0K7	RAI14	retinoic acid induced 14
P28330	ACADL	acyl-CoA dehydrogenase long chain	Q16186	ADRM1	ADRM1 26S proteasome ubiquitin receptor	W5XKT8	SPACA6	sperm acrosome associated 6	Q6PII3	CCDC174	coiled-coil domain containing 174							Q8N0Z8	PUSL1	pseudouridine synthase like 1
Q8NGJ3	OR52E1	olfactory receptor family 52 subfamily E member 1 (gene/pseudogene)	P17706	PTPN2	protein tyrosine phosphatase non-receptor type 2	A6NGE7	URAD	ureidoimidazoline (2-oxo-4-hydroxy-4-carboxy-5-) decarboxylase	Q96AA8	JAKMIP2	janus kinase and microtubule interacting protein 2							P31276	HOXC13	homeobox C13
Q7Z2Q7	LRRC70	leucine rich repeat containing 70	Q17RB0	RTL8B	retrotransposon Gag like 8B	Q8NCA5	FAM98A	family with sequence similarity 98 member A	A0A1S2ZE25	KRAS	KRAS proto-oncogene, GTPase							O75154	RAB11FIP3	RAB11 family interacting protein 3
Q8NGG3	OR5T3	olfactory receptor family 5 subfamily T member 3	Q96A05	ATP6V1E2	ATPase H+ transporting V1 subunit E2	A0A0B4J2E5		Utp12 domain-containing protein	P27815	PDE4A	phosphodiesterase 4A							Q8TCU5	GRIN3A	glutamate ionotropic receptor NMDA type subunit 3A
P45877	PPIC	peptidylprolyl isomerase C	Q5VW36	FOCAD	focadhesin	Q8N1B4	VPS52	VPS52 subunit of GARP complex	P60880	SNAP25	synaptosome associated protein 25							Q5T653	MRPL2	mitochondrial ribosomal protein L2
P83110	HTRA3	HtrA serine peptidase 3	Q9H6B4	CLMP	CXADR like membrane protein	Q49AM1	MTERF2	mitochondrial transcription termination factor 2	Q8NDT2	RBM15B	RNA binding motif protein 15B							A8MXQ7	IQANK1	IQ motif and ankyrin repeat containing 1
P33032	MC5R	melanocortin 5 receptor	Q9Y587	AP4S1	adaptor related protein complex 4 subunit sigma 1	Q7Z736	PLEKHH3	pleckstrin homology, MyTH4 and FERM domain containing H3	Q96JK9	MAML3	mastermind like transcriptional coactivator 3							P78358	CTAG1A	cancer/testis antigen 1A
O14960	LECT2	leukocyte cell derived chemotaxin 2	Q96EH5	RPL39L	ribosomal protein L39 like	Q8N5B7	CERS5	ceramide synthase 5	P08240	SRPRA	SRP receptor subunit alpha							P16066	NPR1	natriuretic peptide receptor 1
P05090	APOD	apolipoprotein D	Q9BTV5	FSD1	fibronectin type III and SPRY domain containing 1	Q9BZM2	PLA2G2F	phospholipase A2 group IIF	P51955	NEK2	NIMA related kinase 2							P62191	PSMC1	proteasome 26S subunit, ATPase 1
A0A075B6N2	TRBV20-1	T cell receptor beta variable 20-1	Q9H6Z4	RANBP3	RAN binding protein 3	Q8N1E6	FBXL14	F-box and leucine rich repeat protein 14	P61916	NPC2	NPC intracellular cholesterol transporter 2							A8MV72		Putative UPF0607 protein ENSP00000382826
Q8NGN8	OR4A4P	olfactory receptor family 4 subfamily A member 4 pseudogene	Q99873	PRMT1	protein arginine methyltransferase 1	Q5SWL7	PRAMEF14	PRAME family member 14	Q9UBJ2	ABCD2	ATP binding cassette subfamily D member 2							Q6ZT98	TTLL7	tubulin tyrosine ligase like 7
Q9BQ69	MACROD1	mono-ADP ribosylhydrolase 1	Q9BWH2	FUNDC2	FUN14 domain containing 2	Q9UBR4	LHX3	LIM homeobox 3	Q8TED9	AFAP1L1	actin filament associated protein 1 like 1							P19622	EN2	engrailed homeobox 2
P09960	LTA4H	leukotriene A4 hydrolase	Q5MAI5	CDKL4	cyclin dependent kinase like 4	A6NES4	MROH2A	maestro heat like repeat family member 2A	Q4G0S7	CCDC152	coiled-coil domain containing 152							Q8TEB1	DCAF11	DDB1 and CUL4 associated factor 11
P11117	ACP2	acid phosphatase 2, lysosomal	Q9NVE4	CCDC87	coiled-coil domain containing 87	O15209	ZBTB22	zinc finger and BTB domain containing 22	Q9UJU5	FOXD3	forkhead box D3							Q8N7X1	RBMXL3	RBMX like 3
P01733	TRBV12-3	T cell receptor beta variable 12-3	P46781	RPS9	ribosomal protein S9	P52743	ZNF137P	zinc finger protein 137, pseudogene	A0A075B6U4	TRAV7	T cell receptor alpha variable 7							Q8IWU5	SULF2	sulfatase 2
Q05084	ICA1	islet cell autoantigen 1	Q96P88	GNRHR2	gonadotropin releasing hormone receptor 2 (pseudogene)	Q9H814	PHAX	phosphorylated adaptor for RNA export	Q8IZ41	RASEF	RAS and EF-hand domain containing							A1L168	C20orf202	chromosome 20 open reading frame 202
Q7RTY9	PRSS41	serine protease 41	Q5T215	TRAPPC3L	trafficking protein particle complex subunit 3L	Q9UBU6	FAM8A1	family with sequence similarity 8 member A1	Q9UPV0	CEP164	centrosomal protein 164							P20138	CD33	CD33 molecule
Q15811	ITSN1	intersectin 1	P37023	ACVRL1	activin A receptor like type 1	Q8NH76	OR56B4	olfactory receptor family 56 subfamily B member 4	Q6NXR0	IRGC	immunity related GTPase cinema							P55884	EIF3B	eukaryotic translation initiation factor 3 subunit B
O76090	BEST1	bestrophin 1	Q92994	BRF1	BRF1 RNA polymerase III transcription initiation factor subunit	A6NMY6	ANXA2P2	annexin A2 pseudogene 2	Q96NL6	SCLT1	sodium channel and clathrin linker 1							Q01850	CDR2	cerebellar degeneration related protein 2
Q8N2C3	DEPDC4	DEP domain containing 4	P50895	BCAM	basal cell adhesion molecule (Lutheran blood group)	Q8IVQ6	ZDHHC21	zinc finger DHHC-type palmitoyltransferase 21	Q16644	MAPKAPK3	MAPK activated protein kinase 3							Q92575	UBXN4	UBX domain protein 4
Q8TCA0	LRRC20	leucine rich repeat containing 20	Q16777	H2AC20	H2A clustered histone 20	Q07869	PPARA	peroxisome proliferator activated receptor alpha	P32519	ELF1	E74 like ETS transcription factor 1							O00571	DDX3X	DEAD-box helicase 3 X-linked
Q9GZK7	OR11A1	olfactory receptor family 11 subfamily A member 1	K9M1U5	IFNL4	interferon lambda 4 (gene/pseudogene)	Q9BQI6	SLF1	SMC5-SMC6 complex localization factor 1	P07992	ERCC1	ERCC excision repair 1, endonuclease non-catalytic subunit							Q96EB1	ELP4	elongator acetyltransferase complex subunit 4
Q8NH50	OR8K5	olfactory receptor family 8 subfamily K member 5	P18124	RPL7	ribosomal protein L7	Q8N309	LRRC43	leucine rich repeat containing 43	Q8TBE1	CNIH3	cornichon family AMPA receptor auxiliary protein 3							O60487	MPZL2	myelin protein zero like 2
Q9UKA1	FBXL5	F-box and leucine rich repeat protein 5	Q9Y5G1	PCDHGB3	protocadherin gamma subfamily B, 3	P14314	PRKCSH	protein kinase C substrate 80K-H	P01764	IGHV3-23	immunoglobulin heavy variable 3-23							Q49A88	CCDC14	coiled-coil domain containing 14
Q8NGG6	OR8B12	olfactory receptor family 8 subfamily B member 12	Q7Z6K4	NRARP	NOTCH regulated ankyrin repeat protein	P0DPI3	CENPVL2	centromere protein V like 2	P57077	MAP3K7CL	MAP3K7 C-terminal like							Q09019	DMWD	DM1 locus, WD repeat containing
Q9NYV8	TAS2R14	taste 2 receptor member 14	Q6NUM9	RETSAT	retinol saturase	P26232	CTNNA2	catenin alpha 2	Q5T6J7	IDNK	IDNK gluconokinase							H0YM25	GOLGA6L22	golgin A6 family like 22
Q8WV93	AFG1L	AFG1 like ATPase	Q7L8W6	DPH6	diphthamine biosynthesis 6	P43487	RANBP1	RAN binding protein 1	P02489	CRYAA	crystallin alpha A							Q13216	ERCC8	ERCC excision repair 8, CSA ubiquitin ligase complex subunit
O94921	CDK14	cyclin dependent kinase 14	O75293	GADD45B	growth arrest and DNA damage inducible beta	P06703	S100A6	S100 calcium binding protein A6	A0A087WSY6	IGKV3D-15	immunoglobulin kappa variable 3D-15							Q53S08	RAB6D	RAB6D, member RAS oncogene family
A6NFA1	TRABD2B	TraB domain containing 2B	P84098	RPL19	ribosomal protein L19	Q7L0R7	RNF44	ring finger protein 44	O00442	RTCA	RNA 3'-terminal phosphate cyclase							Q8NE00	TMEM104	transmembrane protein 104
A8MUP6	GSG1L2	GSG1 like 2	P36915	GNL1	G protein nucleolar 1 (putative)	Q8WTV0	SCARB1	scavenger receptor class B member 1	Q17RS7	GEN1	GEN1 Holliday junction 5' flap endonuclease							Q17R60	IMPG1	interphotoreceptor matrix proteoglycan 1
Q6S8J7	POTEA	POTE ankyrin domain family member A	P42677	RPS27	ribosomal protein S27	Q9HC57	WFDC1	WAP four-disulfide core domain 1	Q92698	RAD54L	RAD54 like							O95170	FBXW10B	F-box and WD repeat domain containing 10B
Q6S545	POTEH	POTE ankyrin domain family member H	Q9Y3Z3	SAMHD1	SAM and HD domain containing deoxynucleoside triphosphate triphosphohydrolase 1	Q9H0D6	XRN2	5'-3' exoribonuclease 2	P04075	ALDOA	aldolase, fructose-bisphosphate A							Q6IPR1	ETFRF1	electron transfer flavoprotein regulatory factor 1
Q8N0Y3	OR4N4	olfactory receptor family 4 subfamily N member 4	O14917	PCDH17	protocadherin 17	Q96CS4	ZNF689	zinc finger protein 689	Q6UX06	OLFM4	olfactomedin 4							O14990	PPP1R2C	PPP1R2C family member C
P07738	BPGM	bisphosphoglycerate mutase	Q03989	ARID5A	AT-rich interaction domain 5A	Q9NP73	ALG13	ALG13 UDP-N-acetylglucosaminyltransferase subunit	Q8IXL9	IQCF2	IQ motif containing F2							Q9Y484	WDR45	WD repeat domain 45
Q96PZ2	FAM111A	FAM111 trypsin like peptidase A	Q08174	PCDH1	protocadherin 1	Q8N6Y1	PCDH20	protocadherin 20	Q9UKG4	SLC13A4	solute carrier family 13 member 4							Q14353	GAMT	guanidinoacetate N-methyltransferase
Q9NS40	KCNH7	potassium voltage-gated channel subfamily H member 7	O75865	TRAPPC6A	trafficking protein particle complex subunit 6A	Q9NRJ3	CCL28	C-C motif chemokine ligand 28	Q9C056	NKX6-2	NK6 homeobox 2							Q96G01	BICD1	BICD cargo adaptor 1
Q5VYY2	LIPM	lipase family member M	Q9BXJ0	C1QTNF5	C1q and TNF related 5	P23142	FBLN1	fibulin 1	O75309	CDH16	cadherin 16							Q96D42	HAVCR1	hepatitis A virus cellular receptor 1
Q8N228	SCML4	Scm polycomb group protein like 4	Q9BT17	MTG1	mitochondrial ribosome associated GTPase 1	Q8N9U9	SPANXA2-OT1	SPANXA2 overlapping transcript 1	P0C7M4	RHOXF2B	Rhox homeobox family member 2B							P05787	KRT8	keratin 8
Q16526	CRY1	cryptochrome circadian regulator 1	Q86X55	CARM1	coactivator associated arginine methyltransferase 1	Q9P2D0	IBTK	inhibitor of Bruton tyrosine kinase	Q01538	MYT1	myelin transcription factor 1							P54756	EPHA5	EPH receptor A5
Q5VWZ2	LYPLAL1	lysophospholipase like 1	O43323	DHH	desert hedgehog signaling molecule	Q9H6E5	TUT1	terminal uridylyl transferase 1, U6 snRNA-specific	Q9Y5J7	TIMM9	translocase of inner mitochondrial membrane 9							Q9UDV7	ZNF282	zinc finger protein 282
O75093	SLIT1	slit guidance ligand 1				Q00597	FANCC	FA complementation group C	Q562F6	SGO2	shugoshin 2							Q1RMZ1	BMT2	base methyltransferase of 25S rRNA 2 homolog
Q9Y536	PPIAL4A	peptidylprolyl isomerase A like 4A				Q9UBM7	DHCR7	7-dehydrocholesterol reductase	Q27J81	INF2	inverted formin 2							O43252	PAPSS1	3'-phosphoadenosine 5'-phosphosulfate synthase 1
O75027	ABCB7	ATP binding cassette subfamily B member 7				Q58FG1	HSP90AA4P	heat shock protein 90 alpha family class A member 4, pseudogene	O14548	COX7A2L	cytochrome c oxidase subunit 7A2 like							Q8NFU3	TSTD1	thiosulfate sulfurtransferase like domain containing 1
Q14201	BTG3	BTG anti-proliferation factor 3				Q9NR96	TLR9	toll like receptor 9	P57057	SLC37A1	solute carrier family 37 member 1							Q9H2Y7	ZNF106	zinc finger protein 106
P10253	GAA	alpha glucosidase				P06858	LPL	lipoprotein lipase	Q00610	CLTC	clathrin heavy chain							P35244	RPA3	replication protein A3
Q6ZUV0	ACOT7L	Putative cytosolic acyl coenzyme A thioester hydrolase-like (EC 3.1.2.2) (Acyl-CoA thioesterase 7-like)				O00305	CACNB4	calcium voltage-gated channel auxiliary subunit beta 4	Q9BQY4	RHOXF2	Rhox homeobox family member 2							Q9P1W9	PIM2	Pim-2 proto-oncogene, serine/threonine kinase
Q9H560	ANKRD19P	ankyrin repeat domain 19, pseudogene				Q92759	GTF2H4	general transcription factor IIH subunit 4	A6QL64	ANKRD36	ankyrin repeat domain 36							Q9UPR5	SLC8A2	solute carrier family 8 member A2
P11586	MTHFD1	methylenetetrahydrofolate dehydrogenase, cyclohydrolase and formyltetrahydrofolate synthetase 1				Q8NBE8	KLHL23	kelch like family member 23	Q12988	HSPB3	heat shock protein family B (small) member 3							Q9NQ48	LZTFL1	leucine zipper transcription factor like 1
Q8NGR8	OR1L8	olfactory receptor family 1 subfamily L member 8				Q9C0K3	ACTR3C	actin related protein 3C	Q7Z3B3	KANSL1	KAT8 regulatory NSL complex subunit 1							Q32MZ4	LRRFIP1	LRR binding FLII interacting protein 1
O95757	HSPA4L	heat shock protein family A (Hsp70) member 4 like				P29536	LMOD1	leiomodin 1	O43325	LYRM1	LYR motif containing 1							P13378	HOXD8	homeobox D8
Q92521	PIGB	phosphatidylinositol glycan anchor biosynthesis class B				Q9Y6F9	WNT6	Wnt family member 6	P50222	MEOX2	mesenchyme homeobox 2							Q5JTV8	TOR1AIP1	torsin 1A interacting protein 1
A0A0G2JMI3	IGHV1-69-2	immunoglobulin heavy variable 1-69-2				P41235	HNF4A	hepatocyte nuclear factor 4 alpha	P14652	HOXB2	homeobox B2							Q9Y5K3	PCYT1B	phosphate cytidylyltransferase 1B, choline
Q13258	PTGDR	prostaglandin D2 receptor				Q96DY7	MTBP	MDM2 binding protein	Q8IY63	AMOTL1	angiomotin like 1							Q9UJU6	DBNL	drebrin like
Q8NGG1	OR8J2	olfactory receptor family 8 subfamily J member 2 (gene/pseudogene)				Q9NXK8	FBXL12	F-box and leucine rich repeat protein 12	Q9H6K4	OPA3	outer mitochondrial membrane lipid metabolism regulator OPA3							Q96RT6	CTAGE1	cutaneous T cell lymphoma-associated antigen 1
Q5JTD7	LRRC73	leucine rich repeat containing 73				Q9UI42	CPA4	carboxypeptidase A4	Q9UN67	PCDHB10	protocadherin beta 10							P14317	HCLS1	hematopoietic cell-specific Lyn substrate 1
P43631	KIR2DS2	killer cell immunoglobulin like receptor, two Ig domains and short cytoplasmic tail 2				P84090	ERH	ERH mRNA splicing and mitosis factor	Q6P1J9	CDC73	cell division cycle 73							Q9BXS9	SLC26A6	solute carrier family 26 member 6
Q96EY1	DNAJA3	DnaJ heat shock protein family (Hsp40) member A3				Q9Y508	RNF114	ring finger protein 114	Q5BVD1	TTMP	TPA-induced transmembrane protein							Q8IXT5	RBM12B	RNA binding motif protein 12B
O14975	SLC27A2	solute carrier family 27 member 2				E5RIL1	UPK3BL2	uroplakin 3B like 2	Q56UN5	MAP3K19	mitogen-activated protein kinase kinase kinase 19							Q05639	EEF1A2	eukaryotic translation elongation factor 1 alpha 2
Q8NG78	OR8G5	olfactory receptor family 8 subfamily G member 5				Q92523	CPT1B	carnitine palmitoyltransferase 1B	A2A3N6	PIPSL	PIP5K1A and PSMD4 like (pseudogene)							Q9UPU7	TBC1D2B	TBC1 domain family member 2B
Q8NGK2	OR52B4	olfactory receptor family 52 subfamily B member 4				Q9Y376	CAB39	calcium binding protein 39	Q8NCC5	SLC37A3	solute carrier family 37 member 3							P14621	ACYP2	acylphosphatase 2
Q08J23	NSUN2	NOP2/Sun RNA methyltransferase 2				Q16658	FSCN1	fascin actin-bundling protein 1	Q4VNC0	ATP13A5	ATPase 13A5							P56557	TMEM50B	transmembrane protein 50B
Q8TF66	LRRC15	leucine rich repeat containing 15				O14526	FCHO1	FCH and mu domain containing endocytic adaptor 1	P42025	ACTR1B	actin related protein 1B							Q6ZMC9	SIGLEC15	sialic acid binding Ig like lectin 15
O00408	PDE2A	phosphodiesterase 2A				Q15256	PTPRR	protein tyrosine phosphatase receptor type R	Q10589	BST2	bone marrow stromal cell antigen 2							Q15695	ZRSR2P1	ZRSR2 pseudogene 1
O43193	MLNR	motilin receptor				Q8WUH2	TGFBRAP1	transforming growth factor beta receptor associated protein 1	Q8TDQ1	CD300LF	CD300 molecule like family member f							Q14247	CTTN	cortactin
P57771	RGS8	regulator of G protein signaling 8				Q9NV58	RNF19A	ring finger protein 19A, RBR E3 ubiquitin protein ligase	P33240	CSTF2	cleavage stimulation factor subunit 2							Q03468	ERCC6	ERCC excision repair 6, chromatin remodeling factor
Q7KZ85	SUPT6H	SPT6 homolog, histone chaperone and transcription elongation factor				Q9UQG0	ERVK-11	endogenous retrovirus group K member 11	P02786	TFRC	transferrin receptor							Q9NWD8	TMEM248	transmembrane protein 248
O75367-2	MACROH2A1	macroH2A.1 histone				Q96GE5	ZNF799	zinc finger protein 799	Q9NRN9	METTL5	methyltransferase 5, N6-adenosine							O75841	UPK1B	uroplakin 1B
Q8NH67	OR52I2	olfactory receptor family 52 subfamily I member 2				P11678	EPX	eosinophil peroxidase	O15525	MAFG	MAF bZIP transcription factor G							Q8NEN9	PDZD8	PDZ domain containing 8
O95744	PMS2P2	PMS1 homolog 2, mismatch repair system component pseudogene 2				Q6YHU6	THADA	THADA armadillo repeat containing	Q96I25	RBM17	RNA binding motif protein 17							Q9NRZ9	HELLS	helicase, lymphoid specific
Q8NGP8	OR5M1	olfactory receptor family 5 subfamily M member 1				Q9BXR6	CFHR5	complement factor H related 5	A0A0A0MS14	IGHV1-45	immunoglobulin heavy variable 1-45							Q8TE23	TAS1R2	taste 1 receptor member 2
P08100	RHO	rhodopsin				Q9Y2X0	MED16	mediator complex subunit 16	P0C7U0	ELFN1	extracellular leucine rich repeat and fibronectin type III domain containing 1							Q15428	SF3A2	splicing factor 3a subunit 2
Q8N5D6	GBGT1	globoside alpha-1,3-N-acetylgalactosaminyltransferase 1 (FORS blood group)				Q9H0D2	ZNF541	zinc finger protein 541	P0C7P1	RBMY1D	RNA binding motif protein Y-linked family 1 member D							A0JD36	TRDV2	T cell receptor delta variable 2
Q9H201	EPN3	epsin 3				Q86VE9	SERINC5	serine incorporator 5	Q86YN6	PPARGC1B	PPARG coactivator 1 beta							Q9BUN5	CCDC28B	coiled-coil domain containing 28B
P29275	ADORA2B	adenosine A2b receptor				B1AL88	NALF1	NALCN channel auxiliary factor 1	O95969	SCGB1D2	secretoglobin family 1D member 2							A0M8Q6	IGLC7	immunoglobulin lambda constant 7
Q502X0	MORN2	MORN repeat containing 2				Q96AK3	APOBEC3D	apolipoprotein B mRNA editing enzyme catalytic subunit 3D	B1ANS9	WDR64	WD repeat domain 64							Q5TF21	SOGA3	Protein SOGA3
Q8N668	COMMD1	copper metabolism domain containing 1				P35789	ZNF93	zinc finger protein 93	O60504	SORBS3	sorbin and SH3 domain containing 3							Q7RTX1	TAS1R1	taste 1 receptor member 1
P20585	MSH3	mutS homolog 3				O75626	PRDM1	PR/SET domain 1	P0C843	LINC00032	Putative uncharacterized protein encoded by LINC00032							Q6IBW4	NCAPH2	non-SMC condensin II complex subunit H2
Q7Z2W9	MRPL21	mitochondrial ribosomal protein L21				Q96QT6	PHF12	PHD finger protein 12	Q9BQ75	CMSS1	cms1 ribosomal small subunit homolog							Q86SG3	DAZ4	deleted in azoospermia 4
Q8WXI4	ACOT11	acyl-CoA thioesterase 11				Q9GZX6	IL22	interleukin 22	A0A0C4DH43	IGHV2-70D	immunoglobulin heavy variable 2-70D							Q8N5S9	CAMKK1	calcium/calmodulin dependent protein kinase kinase 1
A0A376A8Z9	KIR2DS5	killer cell immunoglobulin like receptor, two Ig domains and short cytoplasmic tail 5				Q8WYB5	KAT6B	lysine acetyltransferase 6B	Q6ZW33	MICAL2	microtubule associated monooxygenase, calponin and LIM domain containing 2							J3QSS5	TCP10L2	t-complex 10 like 2 (pseudogene)
Q8NH48	OR5B3	olfactory receptor family 5 subfamily B member 3				Q8N6K7	SAMD3	sterile alpha motif domain containing 3	O60256	PRPSAP2	phosphoribosyl pyrophosphate synthetase associated protein 2							P01112	HRAS	HRas proto-oncogene, GTPase
Q9BPV8	P2RY13	purinergic receptor P2Y13				Q9H5V9	STEEP1	STING1 ER exit protein 1	O94876	TMCC1	transmembrane and coiled-coil domain family 1							Q15493	RGN	regucalcin
P00367	GLUD1	glutamate dehydrogenase 1				P10916	MYL2	myosin light chain 2	P51153	RAB13	RAB13, member RAS oncogene family							Q8IUH3	RBM45	RNA binding motif protein 45
P58004	SESN2	sestrin 2				Q6NT55	CYP4F22	cytochrome P450 family 4 subfamily F member 22	Q14562	DHX8	DEAH-box helicase 8							Q9BS16	CENPK	centromere protein K
A0A075B6H5	TRBV20OR9-2	T cell receptor beta variable 20/OR9-2 (non-functional)				P43351	RAD52	RAD52 homolog, DNA repair protein	P62736	ACTA2	actin alpha 2, smooth muscle							Q9UJ83	HACL1	2-hydroxyacyl-CoA lyase 1
Q8NGP0	OR4C13	olfactory receptor family 4 subfamily C member 13				Q06495	SLC34A1	solute carrier family 34 member 1	Q5T160	RARS2	arginyl-tRNA synthetase 2, mitochondrial							Q9BSN7	TMEM204	transmembrane protein 204
Q14114	LRP8	LDL receptor related protein 8				Q8TC07	TBC1D15	TBC1 domain family member 15	Q9Y2V2	CARHSP1	calcium regulated heat stable protein 1							Q9BYE0	HES7	hes family bHLH transcription factor 7
Q8IUF1	ZNG1B	Zn regulated GTPase metalloprotein activator 1B				P22897	MRC1	mannose receptor C-type 1	O95859	TSPAN12	tetraspanin 12							Q9NSB2	KRT84	keratin 84
Q9Y576	ASB1	ankyrin repeat and SOCS box containing 1				Q9H9V9	JMJD4	jumonji domain containing 4	P57775	FBXW4	F-box and WD repeat domain containing 4							P33176	KIF5B	kinesin family member 5B
Q8NGI1	OR56B2P	olfactory receptor family 56 subfamily B member 2 pseudogene				Q9NR23	GDF3	growth differentiation factor 3	Q9BZD4	NUF2	NUF2 component of NDC80 kinetochore complex							Q53LP3	SOWAHC	sosondowah ankyrin repeat domain family member C
Q9NWS0	PIH1D1	PIH1 domain containing 1				Q99814	EPAS1	endothelial PAS domain protein 1	P30038	ALDH4A1	aldehyde dehydrogenase 4 family member A1							Q86YD3	TMEM25	transmembrane protein 25
A2VCK2	DCDC2B	doublecortin domain containing 2B				O00522	KRIT1	KRIT1 ankyrin repeat containing	Q8WXW3	PIBF1	progesterone immunomodulatory binding factor 1							Q96D31	ORAI1	ORAI calcium release-activated calcium modulator 1
Q6P589	TNFAIP8L2	TNF alpha induced protein 8 like 2				Q99571	P2RX4	purinergic receptor P2X 4	P78406	RAE1	ribonucleic acid export 1							Q9H334	FOXP1	forkhead box P1
Q92796	DLG3	discs large MAGUK scaffold protein 3				P22314	UBA1	ubiquitin like modifier activating enzyme 1	P60602	ROMO1	reactive oxygen species modulator 1							P49761	CLK3	CDC like kinase 3
A0A075B7D8	IGHV3OR15-7	immunoglobulin heavy variable 3/OR15-7 (pseudogene)				Q2KJY2	KIF26B	kinesin family member 26B	P55103	INHBC	inhibin subunit beta C							Q8WZ04	TOMT	transmembrane O-methyltransferase
Q6NTE8	MRNIP	MRN complex interacting protein				Q8WXR4	MYO3B	myosin IIIB	Q9Y6M5	SLC30A1	solute carrier family 30 member 1							Q8NDX5	PHC3	polyhomeotic homolog 3
Q9UIQ6	LNPEP	leucyl and cystinyl aminopeptidase				Q02818	NUCB1	nucleobindin 1	O95678	KRT75	keratin 75							Q14511	NEDD9	neural precursor cell expressed, developmentally down-regulated 9
O95298	NDUFC2	NADH:ubiquinone oxidoreductase subunit C2				Q92935	EXTL1	exostosin like glycosyltransferase 1	Q53ET0	CRTC2	CREB regulated transcription coactivator 2							Q6ZS10	CLEC17A	C-type lectin domain containing 17A
Q13425	SNTB2	syntrophin beta 2				Q9UMW8	USP18	ubiquitin specific peptidase 18	O43752	STX6	syntaxin 6							Q9BQ15	NABP2	nucleic acid binding protein 2
Q96QA6	YPEL2	yippee like 2				Q6PJT7	ZC3H14	zinc finger CCCH-type containing 14	Q8N998	CCDC89	coiled-coil domain containing 89							Q8IY51	TIGD4	tigger transposable element derived 4
Q9Y271	CYSLTR1	cysteinyl leukotriene receptor 1				Q8TAP8	PPP1R35	protein phosphatase 1 regulatory subunit 35	Q5TYW2	ANKRD20A1	ankyrin repeat domain 20 family member A1							O94986	CEP152	centrosomal protein 152
Q0P651	ABHD18	abhydrolase domain containing 18				Q5T4W7	ARTN	artemin	Q9BRT3	MIEN1	migration and invasion enhancer 1							Q5BJE1	CCDC178	coiled-coil domain containing 178
Q9BXC9	BBS2	Bardet-Biedl syndrome 2				A6NMN3	FAM170B	family with sequence similarity 170 member B	P26441	CNTF	ciliary neurotrophic factor							P17600	SYN1	synapsin I
Q8IYL9	GPR65	G protein-coupled receptor 65				Q9HCS2	CYP4F12	cytochrome P450 family 4 subfamily F member 12	Q9BYD3	MRPL4	mitochondrial ribosomal protein L4							P22894	MMP8	matrix metallopeptidase 8
P21741	MDK	midkine				P45974	USP5	ubiquitin specific peptidase 5	Q6PKG0-3	LARP1	La ribonucleoprotein 1, translational regulator							Q6QEF8	CORO6	coronin 6
Q8NG92	OR13H1	olfactory receptor family 13 subfamily H member 1				Q14331	FRG1	FSHD region gene 1	O00124	UBXN8	UBX domain protein 8							Q16352	INA	internexin neuronal intermediate filament protein alpha
P41231	P2RY2	purinergic receptor P2Y2				P0CV99	TSPY4	testis specific protein Y-linked 4	O60907	TBL1X	transducin beta like 1 X-linked							Q8N8L6	ARL10	ADP ribosylation factor like GTPase 10
A6NC51	TMEM150B	transmembrane protein 150B				B7ZLF3	LOC728743	Zinc finger and SCAN domain-containing protein 2-like	Q14494	NFE2L1	NFE2 like bZIP transcription factor 1							O60763	USO1	USO1 vesicle transport factor
O94900	TOX	thymocyte selection associated high mobility group box				Q9H1X3	DNAJC25	DnaJ heat shock protein family (Hsp40) member C25	Q9BT49	THAP7	THAP domain containing 7							Q9Y4P8	WIPI2	WD repeat domain, phosphoinositide interacting 2
P23434	GCSH	glycine cleavage system protein H				Q9NQ66	PLCB1	phospholipase C beta 1	Q9UJW9	SERTAD3	SERTA domain containing 3							Q02790	FKBP4	FKBP prolyl isomerase 4
Q6IF82	OR4A47	olfactory receptor family 4 subfamily A member 47				Q6ZU67	BEND4	BEN domain containing 4	Q8TBJ4	PLPPR1	phospholipid phosphatase related 1							Q13242	SRSF9	serine and arginine rich splicing factor 9
P36551	CPOX	coproporphyrinogen oxidase				O43566	RGS14	regulator of G protein signaling 14	Q9BY79	MFRP	membrane frizzled-related protein							Q8IX90	SKA3	spindle and kinetochore associated complex subunit 3
Q7L1T6	CYB5R4	cytochrome b5 reductase 4				Q4G1C9	GLIPR1L2	GLIPR1 like 2	Q9NRR1	CYTL1	cytokine like 1							A0A1B0GTZ2	CCDC196	coiled-coil domain containing 196
Q96LB8	PGLYRP4	peptidoglycan recognition protein 4				O43189	PHF1	PHD finger protein 1	Q8N3G9	TMEM130	transmembrane protein 130							Q9H628	RERGL	RERG like
Q8NF37	LPCAT1	lysophosphatidylcholine acyltransferase 1				Q86YW0	PLCZ1	phospholipase C zeta 1	Q9HCE6	ARHGEF10L	Rho guanine nucleotide exchange factor 10 like							P02008	HBZ	hemoglobin subunit zeta
Q6ZMB0	B3GNT6	UDP-GlcNAc:betaGal beta-1,3-N-acetylglucosaminyltransferase 6				Q5VZK9	CARMIL1	capping protein regulator and myosin 1 linker 1	Q08881	ITK	IL2 inducible T cell kinase							P53041	PPP5C	protein phosphatase 5 catalytic subunit
Q9BXI3	NT5C1A	5'-nucleotidase, cytosolic IA				P61081	UBE2M	ubiquitin conjugating enzyme E2 M	Q63ZY3	KANK2	KN motif and ankyrin repeat domains 2							Q7LC44	ARC	activity regulated cytoskeleton associated protein
Q6ZVK1	TMEM179	transmembrane protein 179				Q8IU80	TMPRSS6	transmembrane serine protease 6	Q9H6X2	ANTXR1	ANTXR cell adhesion molecule 1							Q9NUN5	LMBRD1	LMBR1 domain containing 1
Q9Y2K2	SIK3	SIK family kinase 3				Q9UKF2	ADAM30	ADAM metallopeptidase domain 30	Q8IXS2	CCDC65	coiled-coil domain containing 65							Q96QU4	FRG2B	FSHD region gene 2 family member B
Q9Y2P4	SLC27A6	solute carrier family 27 member 6				Q8N7W2	BEND7	BEN domain containing 7	O95976	IGSF6	immunoglobulin superfamily member 6							P51553	IDH3G	isocitrate dehydrogenase (NAD(+)) 3 non-catalytic subunit gamma
P43627	KIR2DL2	killer cell immunoglobulin like receptor, two Ig domains and long cytoplasmic tail 2				Q7Z443	PKD1L3	polycystin 1 like 3, transient receptor potential channel interacting	P55036	PSMD4	proteasome 26S subunit ubiquitin receptor, non-ATPase 4							A8MWX3	WASH4P	WASP family homolog 4, pseudogene
Q6P461	ACSM6	acyl-CoA synthetase medium chain family member 6				Q14684	RRP1B	ribosomal RNA processing 1B	Q5HYW3	RTL5	retrotransposon Gag like 5							Q9P0V9	SEPTIN10	septin 10
P06756	ITGAV	integrin subunit alpha V				Q9GZU1	MCOLN1	mucolipin TRP cation channel 1	Q9Y608	LRRFIP2	LRR binding FLII interacting protein 2							Q9UIB8	CD84	CD84 molecule
P32245	MC4R	melanocortin 4 receptor				Q3KNS1	PTCHD3	patched domain containing 3 (gene/pseudogene)	Q9BWT7	CARD10	caspase recruitment domain family member 10							Q8N4Y2	CRACR2B	calcium release activated channel regulator 2B
P81877	SSBP2	single stranded DNA binding protein 2				Q9Y222	DMTF1	cyclin D binding myb like transcription factor 1	O95072	REC8	REC8 meiotic recombination protein							Q8NFH3	NUP43	nucleoporin 43
Q9NRM6	IL17RB	interleukin 17 receptor B				P54108	CRISP3	cysteine rich secretory protein 3	P12525	MYCLP1	MYCL pseudogene 1							Q9BYV9	BACH2	BTB domain and CNC homolog 2
Q6E213	AWAT2	acyl-CoA wax alcohol acyltransferase 2				Q8N1B3	CCNQ	cyclin Q	A6NFD8	HELT	helt bHLH transcription factor							Q9Y2Y6	TMEM98	transmembrane protein 98
Q8NH19	OR10AG1	olfactory receptor family 10 subfamily AG member 1				Q9Y4X3	CCL27	C-C motif chemokine ligand 27	O14569	CYB561D2	cytochrome b561 family member D2							O75828	CBR3	carbonyl reductase 3
A8MXE2	B3GALT9	beta-1,3-galactosyltransferase 9				Q5T5D7	ZNF684	zinc finger protein 684	Q9UN30	SCML1	Scm polycomb group protein like 1							P12955	PEPD	peptidase D
Q9H5Y7	SLITRK6	SLIT and NTRK like family member 6				Q8TAE7	KCNG3	potassium voltage-gated channel modifier subfamily G member 3	Q92993	KAT5	lysine acetyltransferase 5							P0DJI9	SAA2	serum amyloid A2
Q9NXK6	PAQR5	progestin and adipoQ receptor family member 5				P09038	FGF2	fibroblast growth factor 2	A0A1B0GVR7	FAM240C	family with sequence similarity 240 member C							A6NNA5	DRGX	dorsal root ganglia homeobox
Q96M53	TBATA	thymus, brain and testes associated				Q9UJW7	ZNF229	zinc finger protein 229	O75716	STK16	serine/threonine kinase 16							Q9H3T3	SEMA6B	semaphorin 6B
Q8NHA8	OR1F12P	olfactory receptor family 1 subfamily F member 12, pseudogene				P12956	XRCC6	X-ray repair cross complementing 6	Q8N3Y1	FBXW8	F-box and WD repeat domain containing 8							Q8TC36	SUN5	Sad1 and UNC84 domain containing 5
Q96HA9	PEX11G	peroxisomal biogenesis factor 11 gamma				Q8N0W4	NLGN4X	neuroligin 4 X-linked	Q8TEA1	NSUN6	NOP2/Sun RNA methyltransferase 6							Q02094	RHAG	Rh associated glycoprotein
P21453	S1PR1	sphingosine-1-phosphate receptor 1				Q9Y3Q0	NAALAD2	N-acetylated alpha-linked acidic dipeptidase 2	Q9HBE4	IL21	interleukin 21							Q8N9T8	KRI1	KRI1 homolog
Q9ULH4	LRFN2	leucine rich repeat and fibronectin type III domain containing 2				Q9H091	ZMYND15	zinc finger MYND-type containing 15	P54764	EPHA4	EPH receptor A4							Q9NQI0	DDX4	DEAD-box helicase 4
P28838	LAP3	leucine aminopeptidase 3				P50461	CSRP3	cysteine and glycine rich protein 3	Q9ULW5	RAB26	RAB26, member RAS oncogene family							P55318	FOXA3	forkhead box A3
Q6DKJ4	NXN	nucleoredoxin				A6NH21	SERINC4	serine incorporator 4	Q9UNM6	PSMD13	proteasome 26S subunit, non-ATPase 13							Q8WWM9	CYGB	cytoglobin
Q7Z5S9	TMEM144	transmembrane protein 144				Q9H3R2	MUC13	mucin 13, cell surface associated	Q96QU1	PCDH15	protocadherin related 15							P0DP23	CALM1	calmodulin 1
P07949	RET	ret proto-oncogene				P57727	TMPRSS3	transmembrane serine protease 3	Q2TU34	FBP1	fructose-bisphosphatase 1							P16152	CBR1	carbonyl reductase 1
Q9NZD8	SPG21	SPG21 abhydrolase domain containing, maspardin				Q6NVV7	CDPF1	cysteine rich DPF motif domain containing 1	O75425	MOSPD3	motile sperm domain containing 3							Q9UBR5	CKLF	chemokine like factor
Q02643	GHRHR	growth hormone releasing hormone receptor				Q9H8T0	AKTIP	AKT interacting protein	Q9NYR9	NKIRAS2	NFKB inhibitor interacting Ras like 2							Q00535	CDK5	cyclin dependent kinase 5
P43897	TSFM	Ts translation elongation factor, mitochondrial				Q9H963	ZNF702P	zinc finger protein 702, pseudogene	P42772	CDKN2B	cyclin dependent kinase inhibitor 2B							Q96PB7	OLFM3	olfactomedin 3
Q14106	TOB2	transducer of ERBB2, 2				Q9NPI6	DCP1A	decapping mRNA 1A	Q96NY9	MUS81	MUS81 structure-specific endonuclease subunit							O75146	HIP1R	huntingtin interacting protein 1 related
Q96EG1	ARSG	arylsulfatase G				Q5GAN3	RNASE13	ribonuclease A family member 13 (inactive)	Q05329	GAD2	glutamate decarboxylase 2							A0A075B6S4	IGKV1D-17	immunoglobulin kappa variable 1D-17
O75388	GPR32	G protein-coupled receptor 32				Q29980	MICB	MHC class I polypeptide-related sequence B	Q8TE02	ELP5	elongator acetyltransferase complex subunit 5							Q01085	TIAL1	TIA1 cytotoxic granule associated RNA binding protein like 1
Q10981	FUT2	fucosyltransferase 2				O75143	ATG13	autophagy related 13	O15403	SLC16A6	solute carrier family 16 member 6							Q7Z7N9	TMEM179B	transmembrane protein 179B
Q9UBX7	KLK11	kallikrein related peptidase 11				Q13057	COASY	Coenzyme A synthase	O95772	STARD3NL	STARD3 N-terminal like							P31943	HNRNPH1	heterogeneous nuclear ribonucleoprotein H1
P0C671	BNIP5	BCL2 interacting protein 5				P21283	ATP6V1C1	ATPase H+ transporting V1 subunit C1	Q6PJW8	CNST	consortin, connexin sorting protein							Q16348	SLC15A2	solute carrier family 15 member 2
Q8NGA0	OR7G1	olfactory receptor family 7 subfamily G member 1				Q8N806	UBR7	ubiquitin protein ligase E3 component n-recognin 7	P08729	KRT7	keratin 7							P0C7I6	CCDC159	coiled-coil domain containing 159
Q8IXU6	SLC35F2	solute carrier family 35 member F2				Q9UP52	TFR2	transferrin receptor 2	P31942	HNRNPH3	heterogeneous nuclear ribonucleoprotein H3							P00519	ABL1	ABL proto-oncogene 1, non-receptor tyrosine kinase
P11766	ADH5	alcohol dehydrogenase 5 (class III), chi polypeptide				M0R2J8	DCDC1	doublecortin domain containing 1	P55042	RRAD	RRAD, Ras related glycolysis inhibitor and calcium channel regulator							O75367	MACROH2A1	macroH2A.1 histone
Q5VTQ0	TTC39B	tetratricopeptide repeat domain 39B				O95389	CCN6	cellular communication network factor 6	P0C7W6	CCDC172	coiled-coil domain containing 172							O95835	LATS1	large tumor suppressor kinase 1
P02730	SLC4A1	solute carrier family 4 member 1 (Diego blood group)				Q8NC60	NOA1	nitric oxide associated 1	B2RV13	CFAP97D1	CFAP97 domain containing 1							E2RYF6	MUC22	mucin 22
Q8WWV3	RTN4IP1	reticulon 4 interacting protein 1				O75446	SAP30	Sin3A associated protein 30	Q96FK6	WDR89	WD repeat domain 89							P47897	QARS1	glutaminyl-tRNA synthetase 1
P24928	POLR2A	RNA polymerase II subunit A				Q9H6A9	PCNX3	pecanex 3	P0DMR2	SCGB1C2	secretoglobin family 1C member 2							P13645	KRT10	keratin 10
O43895	XPNPEP2	X-prolyl aminopeptidase 2				Q4G0F5	VPS26B	VPS26 retromer complex component B	P17174	GOT1	glutamic-oxaloacetic transaminase 1							P04181	OAT	ornithine aminotransferase
P47872	SCTR	secretin receptor				P51511	MMP15	matrix metallopeptidase 15	O15400	STX7	syntaxin 7							Q99626	CDX2	caudal type homeobox 2
Q8NGD4	OR4K1	olfactory receptor family 4 subfamily K member 1				Q9H115	NAPB	NSF attachment protein beta	P56962	STX17	syntaxin 17							P51801	CLCNKB	chloride voltage-gated channel Kb
P0DSN6	TAS2R33	taste 2 receptor member 33				Q16674	MIA	MIA SH3 domain containing	B2RXH8	HNRNPCL2	heterogeneous nuclear ribonucleoprotein C like 2							Q9HCN4	GPN1	GPN-loop GTPase 1
P50616	TOB1	transducer of ERBB2, 1				O75131	CPNE3	copine 3	Q96HM7	PCED1B	PC-esterase domain containing 1B							Q9GZZ9	UBA5	ubiquitin like modifier activating enzyme 5
Q8NGB2	OR4C5	olfactory receptor family 4 subfamily C member 5				Q9BRT2	UQCC2	ubiquinol-cytochrome c reductase complex assembly factor 2	O75940	SMNDC1	survival motor neuron domain containing 1							B3KU38	IQCJ-SCHIP1	IQCJ-SCHIP1 readthrough
O14867	BACH1	BTB domain and CNC homolog 1				Q8NFA0	USP32	ubiquitin specific peptidase 32	Q969E2	SCAMP4	secretory carrier membrane protein 4							Q12834	CDC20	cell division cycle 20
P23083	IGHV1-2	immunoglobulin heavy variable 1-2				Q96Q27	ASB2	ankyrin repeat and SOCS box containing 2	Q9NYS0	NKIRAS1	NFKB inhibitor interacting Ras like 1							Q99581	FEV	FEV transcription factor, ETS family member
Q8NGJ0	OR5A1	olfactory receptor family 5 subfamily A member 1				P29508	SERPINB3	serpin family B member 3	A8MYZ5	IQCF6	IQ motif containing F6							Q9BUJ0	ABHD14A	abhydrolase domain containing 14A
Q8IYB1	MB21D2	Mab-21 domain containing 2				Q5W0Z9	ZDHHC20	zinc finger DHHC-type palmitoyltransferase 20	O75600	GCAT	glycine C-acetyltransferase							Q9BPX3	NCAPG	non-SMC condensin I complex subunit G
P19652	ORM2	orosomucoid 2				Q8IY82	DRC7	dynein regulatory complex subunit 7	Q3MIP1	ITPRIPL2	ITPRIP like 2							Q3KNW5	SLC10A6	solute carrier family 10 member 6
P07098	LIPF	lipase F, gastric type				Q9BQ89	FAM110A	family with sequence similarity 110 member A	O60902	SHOX2	SHOX homeobox 2							Q8NDG6	TDRD9	tudor domain containing 9
Q8IXE1	OR4N5	olfactory receptor family 4 subfamily N member 5				Q9BQS7	HEPH	hephaestin	Q5U5X0	LYRM7	LYR motif containing 7							Q96JQ5	MS4A4A	membrane spanning 4-domains A4A
P18825	ADRA2C	adrenoceptor alpha 2C				Q9UBM1	PEMT	phosphatidylethanolamine N-methyltransferase	Q68CZ1	RPGRIP1L	RPGRIP1 like							Q5VT52	RPRD2	regulation of nuclear pre-mRNA domain containing 2
Q5W064	LIPJ	lipase family member J				P12034	FGF5	fibroblast growth factor 5	Q6ZMQ8	AATK	apoptosis associated tyrosine kinase							O43148	RNMT	RNA guanine-7 methyltransferase
Q8NGN5	OR10G8	olfactory receptor family 10 subfamily G member 8				Q99572	P2RX7	purinergic receptor P2X 7	P31269	HOXA9	homeobox A9							Q9NX45	SOHLH2	spermatogenesis and oogenesis specific basic helix-loop-helix 2
Q96DD0	LRRC39	leucine rich repeat containing 39				Q5T6S3	PHF19	PHD finger protein 19	Q53EZ4	CEP55	centrosomal protein 55							O95292	VAPB	VAMP associated protein B and C
Q9NX08	COMMD8	COMM domain containing 8				Q3MIR4	TMEM30B	transmembrane protein 30B	Q6SPF0	SAMD1	sterile alpha motif domain containing 1							P04049	RAF1	Raf-1 proto-oncogene, serine/threonine kinase
P59910	DNAJB13	DnaJ heat shock protein family (Hsp40) member B13				Q9BYV2	TRIM54	tripartite motif containing 54	Q9BXG8	SPZ1	spermatogenic leucine zipper 1							Q6ZRC1	C4orf50	chromosome 4 open reading frame 50
Q6ZMB5	TMEM184A	transmembrane protein 184A				Q9BQ70	TCF25	transcription factor 25	P14859	POU2F1	POU class 2 homeobox 1							Q63HQ0	AP1AR	adaptor related protein complex 1 associated regulatory protein
A0A1B0GX68	TRBV2	T cell receptor beta variable 2				Q6URK8	TEPP	Testis, prostate and placenta-expressed protein	Q96NY8	NECTIN4	nectin cell adhesion molecule 4							A8MTQ0	NOTO	notochord homeobox
Q8TB40	ABHD4	abhydrolase domain containing 4, N-acyl phospholipase B				Q96A33	CCDC47	coiled-coil domain containing 47	P20711	DDC	dopa decarboxylase							Q9C099	LRRCC1	leucine rich repeat and coiled-coil centrosomal protein 1
O43613	HCRTR1	hypocretin receptor 1				Q9H3U1	UNC45A	unc-45 myosin chaperone A	P19484	TFEB	transcription factor EB							O95500	CLDN14	claudin 14
Q9UJX3	ANAPC7	anaphase promoting complex subunit 7				Q9NPA2	MMP25	matrix metallopeptidase 25	Q6UXD7	SLC49A3	solute carrier family 49 member 3							Q8N4C8	MINK1	misshapen like kinase 1
Q8NGA1	OR1M1	olfactory receptor family 1 subfamily M member 1				P51178	PLCD1	phospholipase C delta 1	P49915	GMPS	guanine monophosphate synthase							P35249	RFC4	replication factor C subunit 4
Q5TZ20	OR2G6	olfactory receptor family 2 subfamily G member 6				P01138	NGF	nerve growth factor	P28072	PSMB6	proteasome 20S subunit beta 6							P08727	KRT19	keratin 19
O43304	SEC14L5	SEC14 like lipid binding 5				Q2T9J0	TYSND1	trypsin like peroxisomal matrix peptidase 1	P0DPB3	SCHIP1	schwannomin interacting protein 1							O43812	DUX1	double homeobox 1
Q13596	SNX1	sorting nexin 1				Q07960	ARHGAP1	Rho GTPase activating protein 1	Q96JT2	SLC45A3	solute carrier family 45 member 3							Q14207	NPAT	nuclear protein, coactivator of histone transcription
P21796	VDAC1	voltage dependent anion channel 1				P98187	CYP4F8	cytochrome P450 family 4 subfamily F member 8	Q9Y2W3	SLC45A1	solute carrier family 45 member 1							O95755	RAB36	RAB36, member RAS oncogene family
O15354	GPR37	G protein-coupled receptor 37				C9JPN9	USP17L12	ubiquitin specific peptidase 17 like family member 12	Q8IYE0	CCDC146	coiled-coil domain containing 146							Q9UEY8	ADD3	adducin 3
Q6P179	ERAP2	endoplasmic reticulum aminopeptidase 2				Q13106	ZNF154	zinc finger protein 154	Q96I99	SUCLG2	succinate-CoA ligase GDP-forming subunit beta							P17947	SPI1	Spi-1 proto-oncogene
Q8N987	NECAB1	N-terminal EF-hand calcium binding protein 1				C9JVI0	USP17L11	ubiquitin specific peptidase 17 like family member 11	Q96GM1	PLPPR2	phospholipid phosphatase related 2							P62829	RPL23	ribosomal protein L23
Q9UNW8	GPR132	G protein-coupled receptor 132				P09486	SPARC	secreted protein acidic and cysteine rich	P57081	WDR4	WD repeat domain 4							Q5M9Q1	NKAPL	NFKB activating protein like
Q9HCN6	GP6	glycoprotein VI platelet				Q8N8G2	VGLL2	vestigial like family member 2	O00212	RHOD	ras homolog family member D							Q8N365	CIART	circadian associated repressor of transcription
Q03013	GSTM4	glutathione S-transferase mu 4				O43570	CA12	carbonic anhydrase 12	P85173		Phosphate-binding protein (HPBP)							O95544	NADK	NAD kinase
A0A0C4DH42	IGHV3-66	immunoglobulin heavy variable 3-66				O95416	SOX14	SRY-box transcription factor 14	Q569H4	PRR16	proline rich 16							Q9BRJ7	NUDT16L1	nudix hydrolase 16 like 1
A0A0B4J234	TRAV2	T cell receptor alpha variable 2				O95870	ABHD16A	abhydrolase domain containing 16A, phospholipase	Q02252	ALDH6A1	aldehyde dehydrogenase 6 family member A1							Q86YR5	GPSM1	G protein signaling modulator 1
A0A0J9YXX1	IGHV5-10-1	immunoglobulin heavy variable 5-10-1				P52434	POLR2H	RNA polymerase II, I and III subunit H	Q16621	NFE2	nuclear factor, erythroid 2							P0DMV0	CT45A7	cancer/testis antigen family 45 member A7
Q9H7L2	KIR3DX1	killer cell immunoglobulin like receptor, three Ig domains X1 (pseudogene)				Q8WYR4	RSPH1	radial spoke head component 1	Q96NT1	NAP1L5	nucleosome assembly protein 1 like 5							P54852	EMP3	epithelial membrane protein 3
P00739	HPR	haptoglobin-related protein				Q6ZNA1	ZNF836	zinc finger protein 836	Q86XI6	PPP1R3B	protein phosphatase 1 regulatory subunit 3B							P15408	FOSL2	FOS like 2, AP-1 transcription factor subunit
Q8TC29	ENKUR	enkurin, TRPC channel interacting protein				Q99457	NAP1L3	nucleosome assembly protein 1 like 3	Q9NXZ2	DDX43	DEAD-box helicase 43							A0A0C4DH41	IGHV4-61	immunoglobulin heavy variable 4-61
A6NK06	ACOD1	aconitate decarboxylase 1				Q0JRZ9	FCHO2	FCH and mu domain containing endocytic adaptor 2	P00491	PNP	purine nucleoside phosphorylase							Q8NG68	TTL	tubulin tyrosine ligase
Q96CM8	ACSF2	acyl-CoA synthetase family member 2				P18084	ITGB5	integrin subunit beta 5	Q5VV42	CDKAL1	CDK5 regulatory subunit associated protein 1 like 1							P28069	POU1F1	POU class 1 homeobox 1
Q8NFU0	BEST4	bestrophin 4				Q9UM44	HHLA2	HHLA2 member of B7 family	Q6ZSY5	PPP1R3F	protein phosphatase 1 regulatory subunit 3F							P19013	KRT4	keratin 4
O76002	OR2J2	olfactory receptor family 2 subfamily J member 2				Q8N3S3	PHTF2	putative homeodomain transcription factor 2	P37173	TGFBR2	transforming growth factor beta receptor 2							P49961	ENTPD1	ectonucleoside triphosphate diphosphohydrolase 1
Q6TCH4	PAQR6	progestin and adipoQ receptor family member 6				Q92546	RGP1	RGP1 homolog, RAB6A GEF complex partner 1	Q14137	BOP1	BOP1 ribosomal biogenesis factor							P30050	RPL12	ribosomal protein L12
Q6ICB0	DESI1	desumoylating isopeptidase 1				Q9Y227	ENTPD4	ectonucleoside triphosphate diphosphohydrolase 4	P20594	NPR2	natriuretic peptide receptor 2							O43159	RRP8	ribosomal RNA processing 8
Q6NVY1	HIBCH	3-hydroxyisobutyryl-CoA hydrolase				A6NJV1	FAM166C	Protein FAM166C (Family with sequence similarity 166 member C)	Q9H3M7	TXNIP	thioredoxin interacting protein							Q8N1A0	KRT222	keratin 222
Q15599	SLC9A3R2	Na(+)/H(+) exchange regulatory cofactor NHE-RF2 (NHERF-2) (NHE3 kinase A regulatory protein E3KARP) (SRY-interacting protein 1) (SIP-1) (Sodium-hydrogen exchanger regulatory factor 2) (Solute carrier family 9 isoform A3 regulatory factor 2) (Tyrosine kinase activator protein 1) (TKA-1)				Q8IZD4	DCP1B	decapping mRNA 1B	Q9HBL7	PLGRKT	plasminogen receptor with a C-terminal lysine							P0CB38	PABPC4L	poly(A) binding protein cytoplasmic 4 like
Q4LDG9	DNAL1	dynein axonemal light chain 1				Q6UY09	CEACAM20	CEA cell adhesion molecule 20	Q13352	ITGB3BP	integrin subunit beta 3 binding protein							Q7RTT9	SLC29A4	solute carrier family 29 member 4
Q96C01	FAM136A	family with sequence similarity 136 member A				P51858	HDGF	heparin binding growth factor	O15266	SHOX	SHOX homeobox							Q8WYH8	ING5	inhibitor of growth family member 5
O95013	OR4F21	olfactory receptor family 4 subfamily F member 21				Q9UP38	FZD1	frizzled class receptor 1	O43353	RIPK2	receptor interacting serine/threonine kinase 2							Q6NY19	KANK3	KN motif and ankyrin repeat domains 3
P23945	FSHR	follicle stimulating hormone receptor				O43167	ZBTB24	zinc finger and BTB domain containing 24	Q8N3Y7	SDR16C5	short chain dehydrogenase/reductase family 16C member 5							Q9NR00	TCIM	transcriptional and immune response regulator
Q9GZM5	YIPF3	Yip1 domain family member 3				O15195	VILL	villin like	Q12946	FOXF1	forkhead box F1							O75426	FBXO24	F-box protein 24
Q8TD08	MAPK15	mitogen-activated protein kinase 15				Q92609	TBC1D5	TBC1 domain family member 5	Q9NVI7	ATAD3A	ATPase family AAA domain containing 3A							Q3MJ40	CCDC144BP	coiled-coil domain containing 144B, pseudogene
P09848	LCT	lactase				Q6UY14	ADAMTSL4	ADAMTS like 4	Q8N6C8	LILRA3	leukocyte immunoglobulin like receptor A3							Q6A163	KRT39	keratin 39
P30954	OR10J1	olfactory receptor family 10 subfamily J member 1				Q8WYA1	BMAL2	basic helix-loop-helix ARNT like 2	O75071	EFCAB14	EF-hand calcium binding domain 14							P28715	ERCC5	ERCC excision repair 5, endonuclease
P51884	LUM	lumican				Q9UKG1	APPL1	adaptor protein, phosphotyrosine interacting with PH domain and leucine zipper 1	Q9BY84	DUSP16	dual specificity phosphatase 16							Q9BTE0	NAT9	N-acetyltransferase 9 (putative)
Q6NZ63	STEAP1B	STEAP family member 1B				B2RPK0	HMGB1P1	high mobility group box 1 pseudogene 1	Q3C1V8	BSX	brain specific homeobox							A4D1P6	WDR91	WD repeat domain 91
Q9H208	OR10A2	olfactory receptor family 10 subfamily A member 2				P14778	IL1R1	interleukin 1 receptor type 1	Q5T8P6	RBM26	RNA binding motif protein 26							Q9UK32	RPS6KA6	ribosomal protein S6 kinase A6
Q96S82	UBL7	ubiquitin like 7				Q8WX92	NELFB	negative elongation factor complex member B	Q86UV6	TRIM74	tripartite motif containing 74							Q9Y657	SPIN1	spindlin 1
A0A0G2JQ47	KIR2DS1	killer cell immunoglobulin like receptor, two Ig domains and short cytoplasmic tail 1				Q9UBC0	ONECUT1	one cut homeobox 1	P51532	SMARCA4	SWI/SNF related, matrix associated, actin dependent regulator of chromatin, subfamily a, member 4							Q8WZ42	TTN	titin
Q96C03	MIEF2	mitochondrial elongation factor 2				O60765	ZNF354A	zinc finger protein 354A	Q6PI97	HOATZ	HOATZ cilia and flagella associated protein							A0A0B4J1W7	NPIPA9	nuclear pore complex interacting protein family, member A9
P10323	ACR	acrosin				Q6UX68	XKR5	XK related 5	O15244	SLC22A2	solute carrier family 22 member 2							A6NFF2	NAP1L6P	nucleosome assembly protein 1 like 6, pseudogene
Q8NFJ6	PROKR2	prokineticin receptor 2				Q9P2M4	TBC1D14	TBC1 domain family member 14	Q8N6H7	ARFGAP2	ADP ribosylation factor GTPase activating protein 2							O60271	SPAG9	sperm associated antigen 9
Q8NGZ3	OR13G1	olfactory receptor family 13 subfamily G member 1				Q9UJX6	ANAPC2	anaphase promoting complex subunit 2	Q8IZA3	H1-8	H1.8 linker histone							Q15738	NSDHL	NAD(P) dependent steroid dehydrogenase-like
Q9H7Z7	PTGES2	prostaglandin E synthase 2				Q2WGJ6	KLHL38	kelch like family member 38	Q9NZC7	WWOX	WW domain containing oxidoreductase							P51956	NEK3	NIMA related kinase 3
P55201	BRPF1	bromodomain and PHD finger containing 1				P43652	AFM	afamin	Q9BTD8	RBM42	RNA binding motif protein 42							P62314	SNRPD1	small nuclear ribonucleoprotein D1 polypeptide
Q96HY7	DHTKD1	dehydrogenase E1 and transketolase domain containing 1				P24557	TBXAS1	thromboxane A synthase 1	P54868	HMGCS2	3-hydroxy-3-methylglutaryl-CoA synthase 2							P31327	CPS1	carbamoyl-phosphate synthase 1
Q9Y2L9	LRCH1	leucine rich repeats and calponin homology domain containing 1				Q05655	PRKCD	protein kinase C delta	Q9H7M9	VSIR	V-set immunoregulatory receptor							Q9UBM8	MGAT4C	MGAT4 family member C
Q58FF3	HSP90B2P	heat shock protein 90 beta family member 2, pseudogene				Q15072	ZNF146	zinc finger protein 146	Q9HBB8	CDHR5	cadherin related family member 5							Q8WVP7	LMBR1	limb development membrane protein 1
Q86Y34	ADGRG3	adhesion G protein-coupled receptor G3				Q9H0M4	ZCWPW1	zinc finger CW-type and PWWP domain containing 1	Q9Y285	FARSA	phenylalanyl-tRNA synthetase subunit alpha							Q9NPA1	KCNMB3	potassium calcium-activated channel subfamily M regulatory beta subunit 3
Q8N6D5	ANKRD29	ankyrin repeat domain 29				Q5TCQ9	MAGI3	membrane associated guanylate kinase, WW and PDZ domain containing 3	P55290	CDH13	cadherin 13							A6NFC5	TMEM235	transmembrane protein 235
Q9NR46	SH3GLB2	SH3 domain containing GRB2 like, endophilin B2				Q9BRK5	SDF4	stromal cell derived factor 4	Q9HD20	ATP13A1	ATPase 13A1							Q6ZMD2	SPNS3	SPNS lysolipid transporter 3, sphingosine-1-phosphate (putative)
Q9UBR1	UPB1	beta-ureidopropionase 1				Q969P0	IGSF8	immunoglobulin superfamily member 8	P57739	CLDN2	claudin 2							A6NEH6	TMEM247	transmembrane protein 247
O75325	LRRN2	leucine rich repeat neuronal 2				P17032	ZNF37A	zinc finger protein 37A	Q96HT8	MRFAP1L1	Morf4 family associated protein 1 like 1							Q969X2	ST6GALNAC6	ST6 N-acetylgalactosaminide alpha-2,6-sialyltransferase 6
Q96A35	MRPL24	mitochondrial ribosomal protein L24				A8MVS1			Q9BY77	POLDIP3	DNA polymerase delta interacting protein 3							Q9Y547	HSPB11	Intraflagellar transport protein 25 homolog (Heat shock protein beta-11) (Hspb11) (Placental protein 25) (PP25)
Q5FYB0	ARSJ	arylsulfatase family member J				Q6UVY6	MOXD1	monooxygenase DBH like 1	Q9H967	WDR76	WD repeat domain 76							Q9UKX7	NUP50	nucleoporin 50
Q8NGS6	OR13C3	olfactory receptor family 13 subfamily C member 3				Q9Y5L0	TNPO3	transportin 3	P30085	CMPK1	cytidine/uridine monophosphate kinase 1							Q14244	MAP7	microtubule associated protein 7
P00742	F10	coagulation factor X				Q5GH70	XKR9	XK related 9	Q6P2E9	EDC4	enhancer of mRNA decapping 4							Q96T17	MAP7D2	MAP7 domain containing 2
Q02218	OGDH	oxoglutarate dehydrogenase				Q14739	LBR	lamin B receptor	Q569K6	CCDC157	coiled-coil domain containing 157							Q8N7Z5	ANKRD31	ankyrin repeat domain 31
Q7Z5H4	VN1R5	vomeronasal 1 receptor 5 (gene/pseudogene)				Q96ES7	SGF29	SAGA complex associated factor 29	Q9H2F3	HSD3B7	hydroxy-delta-5-steroid dehydrogenase, 3 beta- and steroid delta-isomerase 7							Q9BZE3	BARHL1	BarH like homeobox 1
P41134	ID1	inhibitor of DNA binding 1				Q08462	ADCY2	adenylate cyclase 2	Q92522	H1-10	H1.10 linker histone							Q8IUH2	CREG2	cellular repressor of E1A stimulated genes 2
Q15022	SUZ12	SUZ12 polycomb repressive complex 2 subunit				Q9NV96	TMEM30A	transmembrane protein 30A	P35250	RFC2	replication factor C subunit 2							Q2TBE0	CWF19L2	CWF19 like cell cycle control factor 2
Q92503	SEC14L1	SEC14 like lipid binding 1				Q9NZF1	PLAC8	placenta associated 8	Q86W54	SPATA24	spermatogenesis associated 24							P52597	HNRNPF	heterogeneous nuclear ribonucleoprotein F
P32246	CCR1	C-C motif chemokine receptor 1				Q6ZUT3	FRMD7	FERM domain containing 7	P0DOY3	IGLC3	immunoglobulin lambda constant 3 (Kern-Oz+ marker)							O75886	STAM2	signal transducing adaptor molecule 2
Q9BY21	GPR87	G protein-coupled receptor 87				Q9BXT4	TDRD1	tudor domain containing 1	Q6UX01	LMBR1L	limb development membrane protein 1 like							Q6P4E1	GOLM2	golgi membrane protein 2
Q9UKL2	OR52A1	olfactory receptor family 52 subfamily A member 1				Q9NUD5	ZCCHC3	zinc finger CCHC-type containing 3	P16442	ABO	ABO, alpha 1-3-N-acetylgalactosaminyltransferase and alpha 1-3-galactosyltransferase							Q92781	RDH5	retinol dehydrogenase 5
P06870	KLK1	kallikrein 1				Q7Z3J2	VPS35L	VPS35 endosomal protein sorting factor like	Q96QR8	PURB	purine rich element binding protein B							Q8IWB7	WDFY1	WD repeat and FYVE domain containing 1
Q15545	TAF7	TATA-box binding protein associated factor 7				Q6PIF6	MYO7B	myosin VIIB	Q9C0D2	CEP295	centrosomal protein 295							O00716	E2F3	E2F transcription factor 3
P42704	LRPPRC	leucine rich pentatricopeptide repeat containing				P16619	CCL3L1	C-C motif chemokine ligand 3 like 1	Q9BQ50	TREX2	three prime repair exonuclease 2							P03905	MT-ND4	mitochondrially encoded NADH:ubiquinone oxidoreductase core subunit 4
Q9BQP9	BPIFA3	BPI fold containing family A member 3				Q8IZN3	ZDHHC14	zinc finger DHHC-type palmitoyltransferase 14	Q6NT76	HMBOX1	homeobox containing 1							P03886	MT-ND1	mitochondrially encoded NADH:ubiquinone oxidoreductase core subunit 1
Q8IY85	EFCAB13	EF-hand calcium binding domain 13				Q08999	RBL2	RB transcriptional corepressor like 2	Q9NY65	TUBA8	tubulin alpha 8							Q8TBM8	DNAJB14	DnaJ heat shock protein family (Hsp40) member B14
P24530	EDNRB	endothelin receptor type B				Q6P9G0	CYB5D1	cytochrome b5 domain containing 1	Q9UKE5	TNIK	TRAF2 and NCK interacting kinase							O75179	ANKRD17	ankyrin repeat domain 17
Q99549	MPHOSPH8	M-phase phosphoprotein 8				Q8N0Y2	ZNF444	zinc finger protein 444	Q8N6F8	METTL27	methyltransferase like 27							Q2NKX8	ERCC6L	ERCC excision repair 6 like, spindle assembly checkpoint helicase
O43447	PPIH	peptidylprolyl isomerase H				Q99469	STAC	SH3 and cysteine rich domain	P13569	CFTR	CF transmembrane conductance regulator							O43763	TLX2	T cell leukemia homeobox 2
P25100	ADRA1D	adrenoceptor alpha 1D				Q15172	PPP2R5A	protein phosphatase 2 regulatory subunit B'alpha	Q9NQ40	SLC52A3	solute carrier family 52 member 3							A0A0K2S4Q6	CD300H	CD300H molecule (gene/pseudogene)
Q5SZD4	GLYATL3	glycine-N-acyltransferase like 3				P17568	NDUFB7	NADH:ubiquinone oxidoreductase subunit B7	O75414	NME6	NME/NM23 nucleoside diphosphate kinase 6							Q5JT25	RAB41	RAB41, member RAS oncogene family
A0A0X1KG70	OR4M2B	olfactory receptor family 4 subfamily M member 2B				Q92925	SMARCD2	SWI/SNF related, matrix associated, actin dependent regulator of chromatin, subfamily d, member 2	Q9Y4P3	TBL2	transducin beta like 2							Q9UJC5	SH3BGRL2	SH3 domain binding glutamate rich protein like 2
Q5M8T2	SLC35D3	solute carrier family 35 member D3				Q8NA19	L3MBTL4	L3MBTL histone methyl-lysine binding protein 4	Q3KP66	INAVA	innate immunity activator							Q96DZ7	TM4SF19	transmembrane 4 L six family member 19
A6NHA9	OR4C46	olfactory receptor family 4 subfamily C member 46				P78357	CNTNAP1	contactin associated protein 1	Q96RR4	CAMKK2	calcium/calmodulin dependent protein kinase kinase 2							Q96GW9	MARS2	methionyl-tRNA synthetase 2, mitochondrial
Q08426	EHHADH	enoyl-CoA hydratase and 3-hydroxyacyl CoA dehydrogenase				Q92622	RUBCN	rubicon autophagy regulator	Q9GZM8	NDEL1	nudE neurodevelopment protein 1 like 1							Q9NUQ6	SPATS2L	spermatogenesis associated serine rich 2 like
Q8N4P2	TTC30B	Tetratricopeptide repeat protein 30B (TPR repeat protein 30B)				Q9BTX7	TTPAL	alpha tocopherol transfer protein like	Q9P2M7	CGN	cingulin							P78410	BTN3A2	butyrophilin subfamily 3 member A2
O15350	TP73	tumor protein p73				O95834	EML2	EMAP like 2	Q9Y6X5	ENPP4	ectonucleotide pyrophosphatase/phosphodiesterase 4							Q12926	ELAVL2	ELAV like RNA binding protein 2
Q8N349	OR2L13	olfactory receptor family 2 subfamily L member 13				Q9BV68	RNF126	ring finger protein 126	O95471	CLDN7	claudin 7							Q9NQC1	JADE2	jade family PHD finger 2
Q99680	GPR22	G protein-coupled receptor 22				Q8NEJ9	NGDN	neuroguidin	O75052	NOS1AP	nitric oxide synthase 1 adaptor protein							Q9BUK6	MSTO1	misato mitochondrial distribution and morphology regulator 1
O95202	LETM1	leucine zipper and EF-hand containing transmembrane protein 1				Q9ULK2	ATXN7L1	ataxin 7 like 1	O43680	TCF21	transcription factor 21							Q9UFD9	RIMBP3	RIMS binding protein 3
P62987	UBA52	ubiquitin A-52 residue ribosomal protein fusion product 1				Q7Z572	SPATA21	spermatogenesis associated 21	P0C7M6	IQCF3	IQ motif containing F3							Q6XR72	SLC30A10	solute carrier family 30 member 10
Q03519	TAP2	transporter 2, ATP binding cassette subfamily B member				Q9H1B5	XYLT2	xylosyltransferase 2	Q8IWZ5	TRIM42	tripartite motif containing 42							P67775	PPP2CA	protein phosphatase 2 catalytic subunit alpha
Q9H227	GBA3	glucosylceramidase beta 3 (gene/pseudogene)				Q9NZI6	TFCP2L1	transcription factor CP2 like 1	O95807	TMEM50A	transmembrane protein 50A							Q9H0U6	MRPL18	mitochondrial ribosomal protein L18
A0A075B7D0	IGHV1OR15-1	immunoglobulin heavy variable 1/OR15-1 (non-functional)				Q5T124	UBXN11	UBX domain protein 11	Q9NYB9	ABI2	abl interactor 2							Q8IZM9	SLC38A6	solute carrier family 38 member 6
A0A0B4J1U6	TRBV9	T cell receptor beta variable 9				Q6PJF5	RHBDF2	rhomboid 5 homolog 2	O75110	ATP9A	ATPase phospholipid transporting 9A (putative)							Q9UG63	ABCF2	ATP binding cassette subfamily F member 2
Q5RIA9	ZNG1E	Zn regulated GTPase metalloprotein activator 1E				Q92913	FGF13	fibroblast growth factor 13	Q9NZ43	USE1	unconventional SNARE in the ER 1							Q92963	RIT1	Ras like without CAAX 1
Q00796	SORD	sorbitol dehydrogenase				Q93034	CUL5	cullin 5	Q8NBV8	SYT8	synaptotagmin 8							Q9GZR2	REXO4	REX4 homolog, 3'-5' exonuclease
P31513	FMO3	flavin containing dimethylaniline monoxygenase 3				Q7Z2W7	TRPM8	transient receptor potential cation channel subfamily M member 8	Q8N0U4	FAM185A	family with sequence similarity 185 member A							Q5T7V8	GORAB	golgin, RAB6 interacting
Q9HDC9	APMAP	adipocyte plasma membrane associated protein				Q13573	SNW1	SNW domain containing 1	Q8NEC5	CATSPER1	cation channel sperm associated 1							Q6UWY5	OLFML1	olfactomedin like 1
Q8NH73	OR4S2	olfactory receptor family 4 subfamily S member 2				P10523	SAG	S-antigen visual arrestin	Q8ND24	RNF214	ring finger protein 214							O00241	SIRPB1	signal regulatory protein beta 1
Q9P0N8	MARCHF2	membrane associated ring-CH-type finger 2				Q9BZ76	CNTNAP3	contactin associated protein family member 3	Q2UY09	COL28A1	collagen type XXVIII alpha 1 chain							Q8NA58	PNLDC1	PARN like ribonuclease domain containing exonuclease 1
Q8NGX9	OR6P1	olfactory receptor family 6 subfamily P member 1				O75553	DAB1	DAB adaptor protein 1	Q96EV2	RBM33	RNA binding motif protein 33							Q8WZ71	TMEM158	transmembrane protein 158
P22695	UQCRC2	ubiquinol-cytochrome c reductase core protein 2				Q6IE38	SPINK14	serine peptidase inhibitor Kazal type 14 (putative)	Q13572	ITPK1	inositol-tetrakisphosphate 1-kinase							O14730	RIOK3	RIO kinase 3
P31948	STIP1	stress induced phosphoprotein 1				Q9NXV2	KCTD5	potassium channel tetramerization domain containing 5	O94762	RECQL5	RecQ like helicase 5							Q7Z4H7	HAUS6	HAUS augmin like complex subunit 6
P36776	LONP1	lon peptidase 1, mitochondrial				Q92902	HPS1	HPS1 biogenesis of lysosomal organelles complex 3 subunit 1	P48382	RFX5	regulatory factor X5							Q5HYK7	SH3D19	SH3 domain containing 19
A0A0B4J263	TRAV39	T cell receptor alpha variable 39				Q8IWE4	DCUN1D3	defective in cullin neddylation 1 domain containing 3	P49137	MAPKAPK2	MAPK activated protein kinase 2							O15409	FOXP2	forkhead box P2
Q99986	VRK1	VRK serine/threonine kinase 1				A3KN83	SBNO1	strawberry notch homolog 1	Q9UL25	RAB21	RAB21, member RAS oncogene family							Q06547	GABPB1	GA binding protein transcription factor subunit beta 1
Q5VT25	CDC42BPA	CDC42 binding protein kinase alpha				Q9BZ29	DOCK9	dedicator of cytokinesis 9	Q9UII2	ATP5IF1	ATP synthase inhibitory factor subunit 1							Q6UWV6	ENPP7	ectonucleotide pyrophosphatase/phosphodiesterase 7
P62937	PPIA	peptidylprolyl isomerase A				Q8IYR6	TMEFF1	transmembrane protein with EGF like and two follistatin like domains 1	O95990	FAM107A	family with sequence similarity 107 member A							P24311	COX7B	cytochrome c oxidase subunit 7B
P30989	NTSR1	neurotensin receptor 1				Q13938	CAPS	calcyphosine	Q12866	MERTK	MER proto-oncogene, tyrosine kinase							Q05193	DNM1	dynamin 1
Q8NGS0	OR1N1	olfactory receptor family 1 subfamily N member 1				Q8IWU9	TPH2	tryptophan hydroxylase 2	O60909	B4GALT2	beta-1,4-galactosyltransferase 2							Q6S8J3	POTEE	POTE ankyrin domain family member E
Q9Y5Y5	PEX16	peroxisomal biogenesis factor 16				Q9Y446	PKP3	plakophilin 3	P01569	IFNA5	interferon alpha 5							P19419	ELK1	ETS transcription factor ELK1
Q9Y585	OR1A2	olfactory receptor family 1 subfamily A member 2				Q96H40	ZNF486	zinc finger protein 486	Q9NZR4	VSX1	visual system homeobox 1							P21579	SYT1	synaptotagmin 1
A0A0G2JNG1	KIR2DS5	killer cell immunoglobulin like receptor, two Ig domains and short cytoplasmic tail 5				A0A1B0GVH7	IQCM	IQ motif containing M	Q9H094	NBPF3	NBPF member 3							A0A1W2PS18	PMIS2	PMIS2 transmembrane protein
Q8NH40	OR6S1	olfactory receptor family 6 subfamily S member 1				O75380	NDUFS6	NADH:ubiquinone oxidoreductase subunit S6	P17544	ATF7	activating transcription factor 7							A6NNN8	SLC38A8	solute carrier family 38 member 8
Q6PID6	TTC33	tetratricopeptide repeat domain 33				O43900	PRICKLE3	prickle planar cell polarity protein 3	O95190	OAZ2	ornithine decarboxylase antizyme 2							Q3BBV2	NBPF8	NBPF member 8
O95379	TNFAIP8	TNF alpha induced protein 8				Q96DU7	ITPKC	inositol-trisphosphate 3-kinase C	Q8NCB2	CAMKV	CaM kinase like vesicle associated							Q9Y2J4	AMOTL2	angiomotin like 2
Q08AI8	MAB21L4	mab-21 like 4				O15498	YKT6	YKT6 v-SNARE homolog	Q13416	ORC2	origin recognition complex subunit 2							Q92918	MAP4K1	mitogen-activated protein kinase kinase kinase kinase 1
Q9P2R3	ANKFY1	ankyrin repeat and FYVE domain containing 1				P14415	ATP1B2	ATPase Na+/K+ transporting subunit beta 2	P19623	SRM	spermidine synthase							P22570	FDXR	ferredoxin reductase
A0A0B4J249	TRAV5	T cell receptor alpha variable 5				Q96JL9	ZNF333	zinc finger protein 333	Q8NB49	ATP11C	ATPase phospholipid transporting 11C							P30536	TSPO	translocator protein
Q9P202	WHRN	whirlin				Q9Y625	GPC6	glypican 6	Q9BZD2	SLC29A3	solute carrier family 29 member 3							Q8TAU0	NKX2-3	NK2 homeobox 3
Q9HBH1	PDF	peptide deformylase, mitochondrial				Q92793	CREBBP	CREB binding protein	P13498	CYBA	cytochrome b-245 alpha chain							Q8N2H3	PYROXD2	pyridine nucleotide-disulphide oxidoreductase domain 2
Q96HJ9	FMC1	formation of mitochondrial complex V assembly factor 1 homolog				Q86V25	VASH2	vasohibin 2	P16520	GNB3	G protein subunit beta 3							P47813	EIF1AX	eukaryotic translation initiation factor 1A X-linked
P47881	OR3A1	olfactory receptor family 3 subfamily A member 1				B2RXH2	KDM4E	lysine demethylase 4E	Q9H8K7	PAAT	ATPase PAAT (EC 3.6.1.-) (Protein associated with ABC transporters) (PAAT)							Q9NZN9	AIPL1	aryl hydrocarbon receptor interacting protein like 1
Q5T7M4	C1QTNF12	C1q and TNF related 12				Q99470	SDF2	stromal cell derived factor 2	P62913	RPL11	ribosomal protein L11							O75177	SS18L1	SS18L1 subunit of BAF chromatin remodeling complex
Q8NGK6	OR52I1	olfactory receptor family 52 subfamily I member 1				Q7L5A8	FA2H	fatty acid 2-hydroxylase	Q8N8I0	SAMD12	sterile alpha motif domain containing 12							Q8NBZ0	INO80E	INO80 complex subunit E
Q8NGG8	OR8B3	olfactory receptor family 8 subfamily B member 3				Q9BVC5	C2orf49	chromosome 2 open reading frame 49	Q6DKI7	PVRIG	PVR related immunoglobulin domain containing							Q9NPI5	NMRK2	nicotinamide riboside kinase 2
Q53FZ2	ACSM3	acyl-CoA synthetase medium chain family member 3				O00160	MYO1F	myosin IF	Q5T5J6	SWT1	SWT1 RNA endoribonuclease homolog							Q9NSP4	CENPM	centromere protein M
P15848	ARSB	arylsulfatase B				Q8TAV3	CYP2W1	cytochrome P450 family 2 subfamily W member 1	O14576	DYNC1I1	dynein cytoplasmic 1 intermediate chain 1							Q5U5Q3	MEX3C	mex-3 RNA binding family member C
A0A1B0GX49	TRBV6-4	T cell receptor beta variable 6-4				Q9H0M0	WWP1	WW domain containing E3 ubiquitin protein ligase 1	P12268	IMPDH2	inosine monophosphate dehydrogenase 2							Q6AHZ1	ZNF518A	zinc finger protein 518A
Q9NY59	SMPD3	sphingomyelin phosphodiesterase 3				Q13405	MRPL49	mitochondrial ribosomal protein L49	A0JD37	TRDV3	T cell receptor delta variable 3							Q8N100	ATOH7	atonal bHLH transcription factor 7
Q9H209	OR10A4	olfactory receptor family 10 subfamily A member 4				O60729	CDC14B	cell division cycle 14B	Q96SZ6	CDK5RAP1	CDK5 regulatory subunit associated protein 1							Q9H2M3	BHMT2	betaine--homocysteine S-methyltransferase 2
Q96P68	OXGR1	oxoglutarate receptor 1				Q9ULL4	PLXNB3	plexin B3	Q5J8X5	MS4A13	membrane spanning 4-domains A13							Q07687	DLX2	distal-less homeobox 2
Q9UIV1	CNOT7	CCR4-NOT transcription complex subunit 7				Q96N46	TTC14	tetratricopeptide repeat domain 14	Q8N1N0	CLEC4F	C-type lectin domain family 4 member F							Q12840	KIF5A	kinesin family member 5A
A0A1W2PPM1	CPHXL	cytoplasmic polyadenylated homeobox like				Q8IY67	RAVER1	ribonucleoprotein, PTB binding 1	O60779	SLC19A2	solute carrier family 19 member 2							Q86VW1	SLC22A16	solute carrier family 22 member 16
Q86WU2	LDHD	lactate dehydrogenase D				Q6NXP6	NOXRED1	NADP dependent oxidoreductase domain containing 1	P62308	SNRPG	small nuclear ribonucleoprotein polypeptide G							Q9HCD5	NCOA5	nuclear receptor coactivator 5
Q86VH4	LRRTM4	leucine rich repeat transmembrane neuronal 4				Q13443	ADAM9	ADAM metallopeptidase domain 9	Q5VV67	PPRC1	PPARG related coactivator 1							Q6IE81	JADE1	jade family PHD finger 1
Q9UQ05	KCNH4	potassium voltage-gated channel subfamily H member 4				P55285	CDH6	cadherin 6	P21757	MSR1	macrophage scavenger receptor 1							Q05682	CALD1	caldesmon 1
O14843	FFAR3	free fatty acid receptor 3				Q86T24	ZBTB33	zinc finger and BTB domain containing 33	P54219	SLC18A1	solute carrier family 18 member A1							P15907	ST6GAL1	ST6 beta-galactoside alpha-2,6-sialyltransferase 1
P08254	MMP3	matrix metallopeptidase 3				P04085	PDGFA	platelet derived growth factor subunit A	P31275	HOXC12	homeobox C12							Q06136	KDSR	3-ketodihydrosphingosine reductase
Q5QJU3	ACER2	alkaline ceramidase 2				Q92508	PIEZO1	piezo type mechanosensitive ion channel component 1	O43818	RRP9	ribosomal RNA processing 9, U3 small nucleolar RNA binding protein							P09104	ENO2	enolase 2
Q6IEZ7	OR2T5	olfactory receptor family 2 subfamily T member 5				Q96PQ7	KLHL5	kelch like family member 5	Q3YBR2	TBRG1	transforming growth factor beta regulator 1							Q96H12	MSANTD3	Myb/SANT DNA binding domain containing 3
Q9UGF6	OR5V1	olfactory receptor family 5 subfamily V member 1				Q92688	ANP32B	acidic nuclear phosphoprotein 32 family member B	Q96BR1	SGK3	serum/glucocorticoid regulated kinase family member 3							Q15744	CEBPE	CCAAT enhancer binding protein epsilon
Q8NGJ5	OR51L1	olfactory receptor family 51 subfamily L member 1				P35221	CTNNA1	catenin alpha 1	O60423	ATP8B3	ATPase phospholipid transporting 8B3							Q8N2H4	SYS1	SYS1 golgi trafficking protein
P21918	DRD5	dopamine receptor D5				P58294	PROK1	prokineticin 1	O60391	GRIN3B	glutamate ionotropic receptor NMDA type subunit 3B							A0A0C4DH34	IGHV4-28	immunoglobulin heavy variable 4-28
Q9NX78	TMEM260	transmembrane protein 260				Q5VVQ6	YOD1	YOD1 deubiquitinase	Q96I36	COX14	cytochrome c oxidase assembly factor COX14							Q9BX46	RBM24	RNA binding motif protein 24
Q9GZN0	GPR88	G protein-coupled receptor 88				Q16527	CSRP2	cysteine and glycine rich protein 2	O75310	UGT2B11	UDP glucuronosyltransferase family 2 member B11							Q8NEF3	CCDC112	coiled-coil domain containing 112
Q9Y5N6	ORC6	origin recognition complex subunit 6				Q9NZQ9	TMOD4	tropomodulin 4	P30533	LRPAP1	LDL receptor related protein associated protein 1							P17483	HOXB4	homeobox B4
Q8NDC4	MORN4	MORN repeat containing 4				Q5JXM2	METTL24	methyltransferase like 24	P62995	TRA2B	transformer 2 beta homolog							Q5H9K5	ZMAT1	zinc finger matrin-type 1
C9JR72	KBTBD13	kelch repeat and BTB domain containing 13				A8K0R7	ZNF839	zinc finger protein 839	A0A075B6R9	IGKV2D-24	immunoglobulin kappa variable 2D-24 (non-functional)							O75420	GIGYF1	GRB10 interacting GYF protein 1
O00308	WWP2	WW domain containing E3 ubiquitin protein ligase 2				Q01433	AMPD2	adenosine monophosphate deaminase 2	O00746	NME4	NME/NM23 nucleoside diphosphate kinase 4							Q9Y6D9	MAD1L1	mitotic arrest deficient 1 like 1
A0A3B3IT45	OR51C1P	olfactory receptor family 51 subfamily C member 1 pseudogene				Q2VWA4	SKOR2	SKI family transcriptional corepressor 2	Q9UN37	VPS4A	vacuolar protein sorting 4 homolog A							A0A075B6J6	IGLV3-22	immunoglobulin lambda variable 3-22
Q8NH53	OR52N1	olfactory receptor family 52 subfamily N member 1				P78344	EIF4G2	eukaryotic translation initiation factor 4 gamma 2	Q6P2H8	TMEM53	transmembrane protein 53							O60784	TOM1	target of myb1 membrane trafficking protein
P13612	ITGA4	integrin subunit alpha 4				Q96K49	TMEM87B	transmembrane protein 87B	Q8NBT0	POC1A	POC1 centriolar protein A							A2NJV5	IGKV2-29	immunoglobulin kappa variable 2-29
F2Z333	FNDC10	fibronectin type III domain containing 10				Q13325	IFIT5	interferon induced protein with tetratricopeptide repeats 5	P04216	THY1	Thy-1 cell surface antigen							Q86XE5	HOGA1	4-hydroxy-2-oxoglutarate aldolase 1
P29373	CRABP2	cellular retinoic acid binding protein 2				P16471	PRLR	prolactin receptor	Q8TDY3	ACTRT2	actin related protein T2							O14683	TP53I11	tumor protein p53 inducible protein 11
Q92831	KAT2B	lysine acetyltransferase 2B				Q8N5Q1	GARIN5B	golgi associated RAB2 interactor family member 5B	O14957	UQCR11	ubiquinol-cytochrome c reductase, complex III subunit XI							Q15637	SF1	splicing factor 1
Q9NSY2	STARD5	StAR related lipid transfer domain containing 5				Q6UXS0	CLEC19A	C-type lectin domain containing 19A	P83369	LSM11	LSM11, U7 small nuclear RNA associated							A0A2R8Y7D0	TINCR	TINCR ubiquitin domain containing
Q9H9A6	LRRC40	leucine rich repeat containing 40				Q9C0H2	TTYH3	tweety family member 3	Q6UUV7	CRTC3	CREB regulated transcription coactivator 3							Q5SZJ8	BEND6	BEN domain containing 6
P0DUB6	AMY1A	amylase alpha 1A				Q9BWG6	SCNM1	sodium channel modifier 1	A0A0C4DH90	IGKV3OR2-268	immunoglobulin kappa variable 3/OR2-268 (non-functional)							Q9NQ75	CASS4	Cas scaffold protein family member 4
O15226	NKRF	NFKB repressing factor				Q5TC63	GRTP1	growth hormone regulated TBC protein 1	P26374	CHML	CHM like Rab escort protein							O75449	KATNA1	katanin catalytic subunit A1
Q99643	SDHC	succinate dehydrogenase complex subunit C				Q15942	ZYX	zyxin	Q96LB4	ATP6V1G3	ATPase H+ transporting V1 subunit G3							Q86TG7	PEG10	paternally expressed 10
Q9H2C5	OR52A5	olfactory receptor family 52 subfamily A member 5				Q16384	SSX1	SSX family member 1	A0A0G2JNQ3	HNRNPCL2	heterogeneous nuclear ribonucleoprotein C like 2							Q13761	RUNX3	RUNX family transcription factor 3
Q8NGL7	OR4P4	olfactory receptor family 4 subfamily P member 4				Q9UBX5	FBLN5	fibulin 5	Q9NWU5	MRPL22	mitochondrial ribosomal protein L22							Q9Y2D1	ATF5	activating transcription factor 5
Q6PL24	TMED8	transmembrane p24 trafficking protein family member 8				Q9NS84	CHST7	carbohydrate sulfotransferase 7	Q0VGL1	LAMTOR4	late endosomal/lysosomal adaptor, MAPK and MTOR activator 4							Q6PML9	SLC30A9	solute carrier family 30 member 9
Q9UBE0	SAE1	SUMO1 activating enzyme subunit 1				Q8IWA6	CCDC60	coiled-coil domain containing 60	Q9UQB8	BAIAP2	BAR/IMD domain containing adaptor protein 2							O95989	NUDT3	nudix hydrolase 3
P60201	PLP1	proteolipid protein 1				O15440	ABCC5	ATP binding cassette subfamily C member 5	Q4LEZ3	AARD	alanine and arginine rich domain containing protein							Q8N4X5	AFAP1L2	actin filament associated protein 1 like 2
A0A0G2JPC4	KIR2DL5B	killer cell immunoglobulin like receptor, two Ig domains and long cytoplasmic tail 5B				Q12766	HMGXB3	HMG-box containing 3	Q8IXQ5	KLHL7	kelch like family member 7							Q96AE4	FUBP1	far upstream element binding protein 1
P22830	FECH	ferrochelatase				A6NKF2	ARID3C	AT-rich interaction domain 3C	O60469	DSCAM	DS cell adhesion molecule							O00142	TK2	thymidine kinase 2
P60893	GPR85	G protein-coupled receptor 85				Q9Y2G5	POFUT2	protein O-fucosyltransferase 2	Q15393	SF3B3	splicing factor 3b subunit 3							Q9UJA9	ENPP5	ectonucleotide pyrophosphatase/phosphodiesterase family member 5
P86397	HTD2	hydroxyacyl-thioester dehydratase type 2				Q8TDN2	KCNV2	potassium voltage-gated channel modifier subfamily V member 2	Q9UKA8	RCAN3	RCAN family member 3							Q8NCS4	TMEM35B	transmembrane protein 35B
Q9NUN7	ACER3	alkaline ceramidase 3				Q5W0U4	BSPRY	B-box and SPRY domain containing	P42263	GRIA3	glutamate ionotropic receptor AMPA type subunit 3							Q9HB20	PLEKHA3	pleckstrin homology domain containing A3
A0A1W2PR75	SSU72P8	RNA polymerase II subunit A C-terminal domain phosphatase SSU72 (CTD phosphatase SSU72) (EC 3.1.3.16)				Q9Y2F5	ICE1	interactor of little elongation complex ELL subunit 1	P16885	PLCG2	phospholipase C gamma 2							Q7Z4V5	HDGFL2	HDGF like 2
Q8NGW1	OR6B3	olfactory receptor family 6 subfamily B member 3				Q9H313	TTYH1	tweety family member 1	P0DMR1	HNRNPCL4	heterogeneous nuclear ribonucleoprotein C like 4							P55851	UCP2	uncoupling protein 2
P29474	NOS3	nitric oxide synthase 3				Q8ND94	LRRN4CL	LRRN4 C-terminal like	Q8IV32	CCDC71	coiled-coil domain containing 71							Q9UHA2	SS18L2	SS18 like 2
P25325	MPST	mercaptopyruvate sulfurtransferase				Q02080	MEF2B	myocyte enhancer factor 2B	Q5VZB9	DMRTA1	DMRT like family A1							P12980	LYL1	LYL1 basic helix-loop-helix family member
Q9HC36	MRM3	mitochondrial rRNA methyltransferase 3				P53673	CRYBA4	crystallin beta A4	Q147X3	NAA30	N-alpha-acetyltransferase 30, NatC catalytic subunit							Q99583	MNT	MAX network transcriptional repressor
Q9HBX8	LGR6	leucine rich repeat containing G protein-coupled receptor 6				Q9H3S1	SEMA4A	semaphorin 4A	P04629	NTRK1	neurotrophic receptor tyrosine kinase 1							Q13889	GTF2H3	general transcription factor IIH subunit 3
P07478	PRSS2	serine protease 2				Q6ZMW2	ZNF782	zinc finger protein 782	Q49MG5	MAP9	microtubule associated protein 9							Q04743	EMX2	empty spiracles homeobox 2
Q8NBM4	UBAC2	UBA domain containing 2				Q9Y3P9	RABGAP1	RAB GTPase activating protein 1	Q8TBR7	TLCD3A	TLC domain containing 3A							Q92904	DAZL	deleted in azoospermia like
Q9BYG5	PARD6B	par-6 family cell polarity regulator beta				P21580	TNFAIP3	TNF alpha induced protein 3	Q6ZVE7	GOLT1A	golgi transport 1A							O15479	MAGEB2	MAGE family member B2
Q9Y5X5	NPFFR2	neuropeptide FF receptor 2				Q9BT81	SOX7	SRY-box transcription factor 7	Q96GD4	AURKB	aurora kinase B							Q5SZL2	CEP85L	centrosomal protein 85 like
Q56P42	PYDC2	pyrin domain containing 2				Q9C037	TRIM4	tripartite motif containing 4	P69891	HBG1	hemoglobin subunit gamma 1							A2A3L6	TTC24	tetratricopeptide repeat domain 24
Q7L0X2	ERICH6	glutamate rich 6				Q15813	TBCE	tubulin folding cofactor E	Q6A162	KRT40	keratin 40							Q8NHV5	MOSMO	modulator of smoothened
Q8NGM8	OR6M1	olfactory receptor family 6 subfamily M member 1				Q9HC10	OTOF	otoferlin	Q15365	PCBP1	poly(rC) binding protein 1							Q8ND56	LSM14A	LSM14A mRNA processing body assembly factor
Q9ULD6	INTU	inturned planar cell polarity protein				Q01668	CACNA1D	calcium voltage-gated channel subunit alpha1 D	A0A7I2V3D3									P58012	FOXL2	forkhead box L2
Q9HBV1	POPDC3	popeye domain containing 3				Q494X3	ZNF404	zinc finger protein 404	O43678	NDUFA2	NADH:ubiquinone oxidoreductase subunit A2							Q96NG3	ODAD4	outer dynein arm docking complex subunit 4
P47900	P2RY1	purinergic receptor P2Y1				Q9ULY5	CLEC4E	C-type lectin domain family 4 member E	Q01581	HMGCS1	3-hydroxy-3-methylglutaryl-CoA synthase 1							Q9BTA9	WAC	WW domain containing adaptor with coiled-coil
O75208	COQ9	coenzyme Q9				P05181	CYP2E1	cytochrome P450 family 2 subfamily E member 1	Q58F21	BRDT	bromodomain testis associated							Q9NW13	RBM28	RNA binding motif protein 28
Q67FW5	B3GNTL1	UDP-GlcNAc:betaGal beta-1,3-N-acetylglucosaminyltransferase like 1				Q8N187	CARF	calcium responsive transcription factor	Q9ULJ1	ODF2L	outer dense fiber of sperm tails 2 like							P51170	SCNN1G	sodium channel epithelial 1 subunit gamma
Q12968	NFATC3	nuclear factor of activated T cells 3				Q9Y2F9	BTBD3	BTB domain containing 3	Q8IUN9	CLEC10A	C-type lectin domain containing 10A							Q9UHI5	SLC7A8	solute carrier family 7 member 8
Q9H2X6	HIPK2	homeodomain interacting protein kinase 2				Q13105	ZBTB17	zinc finger and BTB domain containing 17	P08134	RHOC	ras homolog family member C							Q8N136	DAW1	dynein assembly factor with WD repeats 1
P47224	RABIF	RAB interacting factor				Q9Y6I3	EPN1	epsin 1	Q9P031	CCDC59	coiled-coil domain containing 59							P46976	GYG1	glycogenin 1
Q96NW4	ANKRD27	ankyrin repeat domain 27				Q13263	TRIM28	tripartite motif containing 28	Q9NQL9	DMRT3	doublesex and mab-3 related transcription factor 3							Q9NTZ6	RBM12	RNA binding motif protein 12
P56730	PRSS12	serine protease 12				Q96MX3	ZNF48	zinc finger protein 48	P31314	TLX1	T cell leukemia homeobox 1							Q6NXT1	ANKRD54	ankyrin repeat domain 54
Q9Y6X3	MAU2	MAU2 sister chromatid cohesion factor				B7ZC32	KIF28P	kinesin family member 28, pseudogene	P51795	CLCN5	chloride voltage-gated channel 5							O95340	PAPSS2	3'-phosphoadenosine 5'-phosphosulfate synthase 2
P50440	GATM	glycine amidinotransferase				Q8N7Q3	ZNF676	zinc finger protein 676	Q9HBH9	MKNK2	MAPK interacting serine/threonine kinase 2							P02794	FTH1	ferritin heavy chain 1
P08912	CHRM5	cholinergic receptor muscarinic 5				Q07507	DPT	dermatopontin	P50336	PPOX	protoporphyrinogen oxidase							Q6IA17	SIGIRR	single Ig and TIR domain containing
P29371	TACR3	tachykinin receptor 3				Q13790	APOF	apolipoprotein F	O95661	DIRAS3	DIRAS family GTPase 3							Q9ULA0	DNPEP	aspartyl aminopeptidase
Q96RD1	OR6C1	olfactory receptor family 6 subfamily C member 1				P11532	DMD	dystrophin	P23510	TNFSF4	TNF superfamily member 4							Q9UHQ4	BCAP29	B cell receptor associated protein 29
Q0VAA2	LRRC74A	leucine rich repeat containing 74A				O14920	IKBKB	inhibitor of nuclear factor kappa B kinase subunit beta	Q17RP2	TIGD6	tigger transposable element derived 6							Q8NES3	LFNG	LFNG O-fucosylpeptide 3-beta-N-acetylglucosaminyltransferase
Q13085	ACACA	acetyl-CoA carboxylase alpha				Q5JWF2	GNAS	GNAS complex locus	Q8N350	CBARP	CACN subunit beta associated regulatory protein							Q8IVF6	ANKRD18A	ankyrin repeat domain 18A
Q9Y5Y4	PTGDR2	prostaglandin D2 receptor 2				A6NMK7	CPSF4L	cleavage and polyadenylation specific factor 4 like	A0A494C0I6		Secreted protein							P36871	PGM1	phosphoglucomutase 1
P43246	MSH2	mutS homolog 2				Q6ZSZ5	ARHGEF18	Rho/Rac guanine nucleotide exchange factor 18	P48066	SLC6A11	solute carrier family 6 member 11							O75419	CDC45	cell division cycle 45
Q9UKR3	KLK13	kallikrein related peptidase 13				Q7L8A9	VASH1	vasohibin 1	Q96IW7	SEC22A	SEC22 homolog A, vesicle trafficking protein							Q14774	HLX	H2.0 like homeobox
P25090	FPR2	formyl peptide receptor 2				Q8N3U4	STAG2	STAG2 cohesin complex component	P68871	HBB	hemoglobin subunit beta							Q8TEC5	SH3RF2	SH3 domain containing ring finger 2
Q9BV23	ABHD6	abhydrolase domain containing 6, acylglycerol lipase				Q9H4F8	SMOC1	SPARC related modular calcium binding 1	O60499	STX10	syntaxin 10							P21854	CD72	CD72 molecule
Q9NV23	OLAH	oleoyl-ACP hydrolase				Q9BWW4	SSBP3	single stranded DNA binding protein 3	A0A075B6H7	IGKV3-7	immunoglobulin kappa variable 3-7 (non-functional)							Q16559	TAL2	TAL bHLH transcription factor 2
Q13424	SNTA1	syntrophin alpha 1				Q16661	GUCA2B	guanylate cyclase activator 2B	Q9H1A3	METTL9	methyltransferase 9, His-X-His N1(pi)-histidine							Q9NXL2	ARHGEF38	Rho guanine nucleotide exchange factor 38
O60759	CYTIP	cytohesin 1 interacting protein				P19793	RXRA	retinoid X receptor alpha	Q86VP1	TAX1BP1	Tax1 binding protein 1							Q9Y2C5	SLC17A4	solute carrier family 17 member 4
Q9H3N1	TMX1	thioredoxin related transmembrane protein 1				P07093	SERPINE2	serpin family E member 2	O14558	HSPB6	heat shock protein family B (small) member 6							Q5SQ80	ANKRD20A2P	ankyrin repeat domain 20 family member A2, pseudogene
Q8TCB6	OR51E1	olfactory receptor family 51 subfamily E member 1				P63272	SUPT4H1	SPT4 homolog, DSIF elongation factor subunit	Q9P246	STIM2	stromal interaction molecule 2							Q9Y618	NCOR2	nuclear receptor corepressor 2
O00299	CLIC1	chloride intracellular channel 1				Q9NWX6	THG1L	tRNA-histidine guanylyltransferase 1 like	P48764	SLC9A3	solute carrier family 9 member A3							Q9BYV8	CEP41	centrosomal protein 41
Q07021	C1QBP	complement C1q binding protein				Q9UHB6	LIMA1	LIM domain and actin binding 1	Q59EK9	RUNDC3A	RUN domain containing 3A							Q9BPW4	APOL4	apolipoprotein L4
Q7Z7M8	B3GNT8	UDP-GlcNAc:betaGal beta-1,3-N-acetylglucosaminyltransferase 8				P16499	PDE6A	phosphodiesterase 6A	Q9NY26	SLC39A1	solute carrier family 39 member 1							Q7Z3Q1	SLC46A3	solute carrier family 46 member 3
P30953	OR1E1	olfactory receptor family 1 subfamily E member 1				Q96GW7	BCAN	brevican	Q86U06	RBM23	RNA binding motif protein 23							P98198	ATP8B2	ATPase phospholipid transporting 8B2
O75643	SNRNP200	small nuclear ribonucleoprotein U5 subunit 200				Q15542	TAF5	TATA-box binding protein associated factor 5	Q9C040	TRIM2	tripartite motif containing 2							Q9NW97	TMEM51	transmembrane protein 51
Q8N4W6	DNAJC22	DnaJ heat shock protein family (Hsp40) member C22				P35610	SOAT1	sterol O-acyltransferase 1	Q9Y275	TNFSF13B	TNF superfamily member 13b							Q92485	SMPDL3B	sphingomyelin phosphodiesterase acid like 3B
P12821	ACE	angiotensin I converting enzyme				Q5T4D3	TMTC4	transmembrane O-mannosyltransferase targeting cadherins 4	E7EU14									Q9HBL8	NMRAL1	NmrA like redox sensor 1
Q8IWX7	UNC45B	unc-45 myosin chaperone B				P01877	IGHA2	immunoglobulin heavy constant alpha 2 (A2m marker)	Q8TCU6	PREX1	phosphatidylinositol-3,4,5-trisphosphate dependent Rac exchange factor 1							A0A0B4J240	TRAV10	T cell receptor alpha variable 10
Q96C45	ULK4	unc-51 like kinase 4				Q9H5Z6	FAM124B	family with sequence similarity 124 member B	P08631	HCK	HCK proto-oncogene, Src family tyrosine kinase							O15127	SCAMP2	secretory carrier membrane protein 2
A0A578	TRBV5-1	T cell receptor beta variable 5-1				A0A0A6YYK4	TRBV7-1	T cell receptor beta variable 7-1 (non-functional)	Q9H6K1	ILRUN	inflammation and lipid regulator with UBA-like and NBR1-like domains							Q9Y6Y0	IVNS1ABP	influenza virus NS1A binding protein
Q8NGJ9	OR51T1	olfactory receptor family 51 subfamily T member 1				Q9Y5A6	ZSCAN21	zinc finger and SCAN domain containing 21	P01602	IGKV1-5	immunoglobulin kappa variable 1-5							Q8N8F6	YIPF7	Yip1 domain family member 7
Q9UKB3	DNAJC12	DnaJ heat shock protein family (Hsp40) member C12				O75586	MED6	mediator complex subunit 6	Q9H8W3	FAM204A	family with sequence similarity 204 member A							Q9Y236	OSGIN2	oxidative stress induced growth inhibitor family member 2
Q16557	PSG3	pregnancy specific beta-1-glycoprotein 3				Q2TAL8	QRICH1	glutamine rich 1	Q8IVT5	KSR1	kinase suppressor of ras 1							A4D1S5	RAB19	RAB19, member RAS oncogene family
Q8NCW5	NAXE	NAD(P)HX epimerase				Q6ZTW0	TPGS1	tubulin polyglutamylase complex subunit 1	P61026	RAB10	RAB10, member RAS oncogene family							Q8TF68	ZNF384	zinc finger protein 384
Q9UDR5	AASS	aminoadipate-semialdehyde synthase				P51814	ZNF41	zinc finger protein 41	O75398	DEAF1	DEAF1 transcription factor							Q96T83	SLC9A7	solute carrier family 9 member A7
A0A1W2PQ64	SSU72P5	RNA polymerase II subunit A C-terminal domain phosphatase SSU72 (CTD phosphatase SSU72) (EC 3.1.3.16)				P01213	PDYN	prodynorphin	Q06830	PRDX1	peroxiredoxin 1							Q9NX95	SYBU	syntabulin
Q8N4S7	PAQR4	progestin and adipoQ receptor family member 4				Q9Y5B8	NME7	NME/NM23 family member 7	P37268	FDFT1	farnesyl-diphosphate farnesyltransferase 1							O15269	SPTLC1	serine palmitoyltransferase long chain base subunit 1
Q53HV7	SMUG1	single-strand-selective monofunctional uracil-DNA glycosylase 1				Q9H3P7	ACBD3	acyl-CoA binding domain containing 3	P57772	EEFSEC	eukaryotic elongation factor, selenocysteine-tRNA specific							P38432	COIL	coilin
P45844	ABCG1	ATP binding cassette subfamily G member 1				P25490	YY1	YY1 transcription factor	Q9H4B7	TUBB1	tubulin beta 1 class VI							Q9Y238	DLEC1	DLEC1 cilia and flagella associated protein
Q9HB40	SCPEP1	serine carboxypeptidase 1				Q15063	POSTN	periostin	Q8TCU3	SLC7A13	solute carrier family 7 member 13							Q8IX12	CCAR1	cell division cycle and apoptosis regulator 1
Q9NQS5	GPR84	G protein-coupled receptor 84				Q5H9I0	TFDP3	transcription factor Dp family member 3	Q6ZV65	FAM47E	family with sequence similarity 47 member E							Q9Y5E1	PCDHB9	protocadherin beta 9
Q8N127	OR5AS1	olfactory receptor family 5 subfamily AS member 1				Q8TDF6	RASGRP4	RAS guanyl releasing protein 4	Q8TAI7	RHEBL1	RHEB like 1							P62955	CACNG7	calcium voltage-gated channel auxiliary subunit gamma 7
Q8WVZ9	KBTBD7	kelch repeat and BTB domain containing 7				Q13009	TIAM1	TIAM Rac1 associated GEF 1	Q9BVT8	TMUB1	transmembrane and ubiquitin like domain containing 1							Q99836	MYD88	MYD88 innate immune signal transduction adaptor
Q8TE67	EPS8L3	EPS8 like 3				P57073	SOX8	SRY-box transcription factor 8	Q7Z3H4	SAMD7	sterile alpha motif domain containing 7							Q9Y6I7	WSB1	WD repeat and SOCS box containing 1
O43679	LDB2	LIM domain binding 2				Q8IWT6	LRRC8A	leucine rich repeat containing 8 VRAC subunit A	O43639	NCK2	NCK adaptor protein 2							Q16576	RBBP7	RB binding protein 7, chromatin remodeling factor
P47898	HTR5A	5-hydroxytryptamine receptor 5A				P13682	ZNF35	zinc finger protein 35	P31749	AKT1	AKT serine/threonine kinase 1							Q16625	OCLN	occludin
Q58FF7	HSP90AB3P	heat shock protein 90 alpha family class B member 3, pseudogene				A6NE02	BTBD17	BTB domain containing 17	Q96DH6	MSI2	musashi RNA binding protein 2							Q32P41	TRMT5	tRNA methyltransferase 5
Q9Y5Z7	HCFC2	host cell factor C2				O94827	PLEKHG5	pleckstrin homology and RhoGEF domain containing G5	O43825	B3GALT2	beta-1,3-galactosyltransferase 2							Q9H7N4	SCAF1	SR-related CTD associated factor 1
Q53S58	TMEM177	transmembrane protein 177				P17655	CAPN2	calpain 2	Q5T1V6	DDX59	DEAD-box helicase 59							Q96CT7	CCDC124	coiled-coil domain containing 124
Q96RI0	F2RL3	F2R like thrombin or trypsin receptor 3				Q9H9A7	RMI1	RecQ mediated genome instability 1	P0CG04	IGLC1	immunoglobulin lambda constant 1							P12035	KRT3	keratin 3
Q5T1Q4	SLC35F1	solute carrier family 35 member F1				P63145	ERVK-24	endogenous retrovirus group K member 24	Q16099	GRIK4	glutamate ionotropic receptor kainate type subunit 4							A0PJE2	DHRS12	dehydrogenase/reductase 12
Q96HS1	PGAM5	PGAM family member 5, mitochondrial serine/threonine protein phosphatase				O75155	CAND2	cullin associated and neddylation dissociated 2 (putative)	Q8WXH6	RAB40A	RAB40A, member RAS oncogene family							P04430	IGKV1-16	immunoglobulin kappa variable 1-16
P59544	TAS2R50	taste 2 receptor member 50				Q0D2J5	ZNF763	zinc finger protein 763	Q86VE3	SATL1	spermidine/spermine N1-acetyl transferase like 1							Q8TAZ6	CMTM2	CKLF like MARVEL transmembrane domain containing 2
Q9UKP6	UTS2R	urotensin 2 receptor				O95163	ELP1	elongator acetyltransferase complex subunit 1	Q5T1M5	FKBP15	FKBP prolyl isomerase family member 15							O75874	IDH1	isocitrate dehydrogenase (NADP(+)) 1
Q8NBA8	DTWD2	DTW domain containing 2				Q5TAA0	TTC22	tetratricopeptide repeat domain 22	Q99973	TEP1	telomerase associated protein 1							Q99729	HNRNPAB	heterogeneous nuclear ribonucleoprotein A/B
Q8IZD0	SAMD14	sterile alpha motif domain containing 14				Q9NPA3	MID1IP1	MID1 interacting protein 1	Q9H422	HIPK3	homeodomain interacting protein kinase 3							P04433	IGKV3-11	immunoglobulin kappa variable 3-11
Q7L2E3	DHX30	DExH-box helicase 30				O75949	NALF2	NALCN channel auxiliary factor 2	Q5BKU9	OXLD1	oxidoreductase like domain containing 1							Q9H553	ALG2	ALG2 alpha-1,3/1,6-mannosyltransferase
Q5TGI0	FAXC	failed axon connections homolog, metaxin like GST domain containing				Q14296	FASTK	Fas activated serine/threonine kinase	O75578	ITGA10	integrin subunit alpha 10							Q52MB2	CCDC184	coiled-coil domain containing 184
Q8WW35	DYNLT2B	dynein light chain Tctex-type 2B				Q8NI22	MCFD2	multiple coagulation factor deficiency 2, ER cargo receptor complex subunit	Q7RTS3	PTF1A	pancreas associated transcription factor 1a							O14494	PLPP1	phospholipid phosphatase 1
Q96DX5	ASB9	ankyrin repeat and SOCS box containing 9				O43736	ITM2A	integral membrane protein 2A	Q9H7X7	IFT22	intraflagellar transport 22							P33981	TTK	TTK protein kinase
Q2PZI1	DPY19L1	dpy-19 like C-mannosyltransferase 1				Q9ULE3	DENND2A	DENN domain containing 2A	P42261	GRIA1	glutamate ionotropic receptor AMPA type subunit 1							P35504	UGT1A5	UDP glucuronosyltransferase family 1 member A5
P63167	DYNLL1	dynein light chain LC8-type 1				Q6IQ16	SPOPL	speckle type BTB/POZ protein like	A0A0M3HER8	GOLGA6L10	golgin A6 family like 10							Q9NR31	SAR1A	secretion associated Ras related GTPase 1A
P22304	IDS	iduronate 2-sulfatase				Q15118	PDK1	pyruvate dehydrogenase kinase 1	P05091	ALDH2	aldehyde dehydrogenase 2 family member							Q8N8E3	CEP112	centrosomal protein 112
Q6UWY2	PRSS57	serine protease 57				Q96F85	CNRIP1	cannabinoid receptor interacting protein 1	Q3BBV0	NBPF1	NBPF member 1							Q2QD12	RPEL1	ribulose-5-phosphate-3-epimerase like 1
P13804	ETFA	electron transfer flavoprotein subunit alpha				P13385	TDGF1	Teratocarcinoma-derived growth factor 1 (Cripto-1 growth factor) (CRGF) (Epidermal growth factor-like cripto protein CR1)	Q14BN4	SLMAP	sarcolemma associated protein							P80748	IGLV3-21	immunoglobulin lambda variable 3-21
P49675	STAR	steroidogenic acute regulatory protein				A6NJ88	SAGE2P	sarcoma antigen 2, pseudogene	Q9BQ67	GRWD1	glutamate rich WD repeat containing 1							Q96QF0	RAB3IP	RAB3A interacting protein
Q9BQR3	PRSS27	serine protease 27				Q6NTF7	APOBEC3H	apolipoprotein B mRNA editing enzyme catalytic subunit 3H	Q9P0K7	RAI14	retinoic acid induced 14							Q86UF2	CTAGE6	CTAGE family member 6
Q9NRX2	MRPL17	mitochondrial ribosomal protein L17				P78395	PRAME	PRAME nuclear receptor transcriptional regulator	Q8N0Z8	PUSL1	pseudouridine synthase like 1							Q9BQE5	APOL2	apolipoprotein L2
Q8WZ75	ROBO4	roundabout guidance receptor 4				Q6UWH4	GASK1B	golgi associated kinase 1B	P31276	HOXC13	homeobox C13							Q13610	PWP1	PWP1 homolog, endonuclein
Q58FF6	HSP90AB4P	heat shock protein 90 alpha family class B member 4, pseudogene				O95409	ZIC2	Zic family member 2	O75154	RAB11FIP3	RAB11 family interacting protein 3							Q02548	PAX5	paired box 5
Q49MI3	CERKL	ceramide kinase like				O75159	SOCS5	suppressor of cytokine signaling 5	Q8TCU5	GRIN3A	glutamate ionotropic receptor NMDA type subunit 3A							Q9NWV8	BABAM1	BRISC and BRCA1 A complex member 1
P08861	CELA3B	chymotrypsin like elastase 3B				Q8TE82	SH3TC1	SH3 domain and tetratricopeptide repeats 1	Q5T653	MRPL2	mitochondrial ribosomal protein L2							Q96F24	NRBF2	nuclear receptor binding factor 2
Q8N371	KDM8	lysine demethylase 8				Q96T91	GPHA2	glycoprotein hormone subunit alpha 2	A8MXQ7	IQANK1	IQ motif and ankyrin repeat containing 1							Q96E40	SPACA9	sperm acrosome associated 9
P30711	GSTT1	glutathione S-transferase theta 1				O00744	WNT10B	Wnt family member 10B	P78358	CTAG1A	cancer/testis antigen 1A							P25092	GUCY2C	guanylate cyclase 2C
B9A014	C21orf140	chromosome 21 open reading frame 140				P08118	MSMB	microseminoprotein beta	P16066	NPR1	natriuretic peptide receptor 1							P56748	CLDN8	claudin 8
Q8WW24	TEKT4	tektin 4				P05771	PRKCB	protein kinase C beta	P62191	PSMC1	proteasome 26S subunit, ATPase 1							Q9Y606	PUS1	pseudouridine synthase 1
Q7Z4H3	HDDC2	HD domain containing 2				Q03591	CFHR1	complement factor H related 1	A8MV72		Putative UPF0607 protein ENSP00000382826							P46109	CRKL	CRK like proto-oncogene, adaptor protein
Q96K37	SLC35E1	solute carrier family 35 member E1				Q9ULL1	PLEKHG1	pleckstrin homology and RhoGEF domain containing G1	Q6ZT98	TTLL7	tubulin tyrosine ligase like 7							A6NCS4	NKX2-6	NK2 homeobox 6
Q8N423	LILRB2	leukocyte immunoglobulin like receptor B2				Q5VYJ5	MALRD1	MAM and LDL receptor class A domain containing 1	P19622	EN2	engrailed homeobox 2							Q9C0B2	CFAP74	cilia and flagella associated protein 74
P22792	CPN2	carboxypeptidase N subunit 2				Q52M93	ZNF585B	zinc finger protein 585B	Q8TEB1	DCAF11	DDB1 and CUL4 associated factor 11							P62330	ARF6	ADP ribosylation factor 6
Q9NTG7	SIRT3	sirtuin 3				P21506	ZNF10	zinc finger protein 10	Q8N7X1	RBMXL3	RBMX like 3							Q14206	RCAN2	regulator of calcineurin 2
Q9BS92	NIPSNAP3B	nipsnap homolog 3B				P56556	NDUFA6	NADH:ubiquinone oxidoreductase subunit A6	Q8IWU5	SULF2	sulfatase 2							Q01826	SATB1	SATB homeobox 1
Q8NG80	OR2L5	olfactory receptor family 2 subfamily L member 5				Q86VX9	MON1A	MON1 homolog A, secretory trafficking associated	A1L168	C20orf202	chromosome 20 open reading frame 202							P00480	OTC	ornithine transcarbamylase
P49190	PTH2R	parathyroid hormone 2 receptor				Q96G28	CFAP36	cilia and flagella associated protein 36	P20138	CD33	CD33 molecule							Q8IYM0	FAM186B	family with sequence similarity 186 member B
A0A075B767	PPIAL4H	peptidylprolyl isomerase A like 4H				Q13322	GRB10	growth factor receptor bound protein 10	P55884	EIF3B	eukaryotic translation initiation factor 3 subunit B							O75508	CLDN11	claudin 11
Q6W3E5	GDPD4	glycerophosphodiester phosphodiesterase domain containing 4				Q08AG7	MZT1	mitotic spindle organizing protein 1	Q01850	CDR2	cerebellar degeneration related protein 2							P41162	ETV3	ETS variant transcription factor 3
P08247	SYP	synaptophysin				P05026	ATP1B1	ATPase Na+/K+ transporting subunit beta 1	Q92575	UBXN4	UBX domain protein 4							O76082	SLC22A5	solute carrier family 22 member 5
Q8WW32	HMGB4	high mobility group box 4				P43007	SLC1A4	solute carrier family 1 member 4	O00571	DDX3X	DEAD-box helicase 3 X-linked							P80217	IFI35	interferon induced protein 35
Q9Y262	EIF3L	eukaryotic translation initiation factor 3 subunit L				Q8IWV7	UBR1	ubiquitin protein ligase E3 component n-recognin 1	Q96EB1	ELP4	elongator acetyltransferase complex subunit 4							Q86UP2	KTN1	kinectin 1
O75094	SLIT3	slit guidance ligand 3				P43146	DCC	DCC netrin 1 receptor	O60487	MPZL2	myelin protein zero like 2							P26038	MSN	moesin
Q92871	PMM1	phosphomannomutase 1				Q8TCT9	HM13	histocompatibility minor 13	Q49A88	CCDC14	coiled-coil domain containing 14							Q96QS6	PSKH2	protein serine kinase H2
Q9H4L5	OSBPL3	oxysterol binding protein like 3				Q5TG30	ARHGAP40	Rho GTPase activating protein 40	Q09019	DMWD	DM1 locus, WD repeat containing							Q9NPZ5	B3GAT2	beta-1,3-glucuronyltransferase 2
Q9BRP8	PYM1	PYM homolog 1, exon junction complex associated factor				P40763	STAT3	signal transducer and activator of transcription 3	H0YM25	GOLGA6L22	golgin A6 family like 22							Q8NBL1	POGLUT1	protein O-glucosyltransferase 1
P29475	NOS1	nitric oxide synthase 1				P08571	CD14	CD14 molecule	Q13216	ERCC8	ERCC excision repair 8, CSA ubiquitin ligase complex subunit							P13349	MYF5	myogenic factor 5
Q9HAQ2	KIF9	kinesin family member 9				O43541	SMAD6	SMAD family member 6	Q53S08	RAB6D	RAB6D, member RAS oncogene family							Q8IWA4	MFN1	mitofusin 1
Q9NYW0	TAS2R10	taste 2 receptor member 10				P09668	CTSH	cathepsin H	Q8NE00	TMEM104	transmembrane protein 104							Q9Y5Q3	MAFB	MAF bZIP transcription factor B
Q8N967	LRTM2	leucine rich repeats and transmembrane domains 2				Q8IY22	CMIP	c-Maf inducing protein	Q17R60	IMPG1	interphotoreceptor matrix proteoglycan 1							Q6ZQN7	SLCO4C1	solute carrier organic anion transporter family member 4C1
Q9Y247	FAM50B	family with sequence similarity 50 member B				Q9HB55	CYP3A43	cytochrome P450 family 3 subfamily A member 43	O95170	FBXW10B	F-box and WD repeat domain containing 10B							Q96E22	NUS1	NUS1 dehydrodolichyl diphosphate synthase subunit
Q86X52	CHSY1	chondroitin sulfate synthase 1				Q9UPU9	SAMD4A	sterile alpha motif domain containing 4A	Q6IPR1	ETFRF1	electron transfer flavoprotein regulatory factor 1							P56750	CLDN17	claudin 17
A0A5K1VDZ0	KIR2DL1	killer cell immunoglobulin like receptor, two Ig domains and long cytoplasmic tail 1				Q92889	ERCC4	ERCC excision repair 4, endonuclease catalytic subunit	O14990	PPP1R2C	PPP1R2C family member C							Q96ED9	HOOK2	hook microtubule tethering protein 2
Q9Y3M8	STARD13	StAR related lipid transfer domain containing 13				B0I1T2	MYO1G	myosin IG	Q9Y484	WDR45	WD repeat domain 45							Q9P2W9	STX18	syntaxin 18
Q9H0I9	TKTL2	transketolase like 2				Q15078	CDK5R1	cyclin dependent kinase 5 regulatory subunit 1	Q14353	GAMT	guanidinoacetate N-methyltransferase							Q9NZQ7	CD274	CD274 molecule
Q9UG01	IFT172	intraflagellar transport 172				P61568	ERVK11-1	endogenous retrovirus group K11 member 1	Q96G01	BICD1	BICD cargo adaptor 1							Q9P1A2	PPP4R1L	protein phosphatase 4 regulatory subunit 1 like (pseudogene)
P09455	RBP1	retinol binding protein 1				Q8WU17	RNF139	ring finger protein 139	Q96D42	HAVCR1	hepatitis A virus cellular receptor 1							Q8WVZ7	RNF133	ring finger protein 133
Q9H939	PSTPIP2	proline-serine-threonine phosphatase interacting protein 2				Q96TA1	NIBAN2	niban apoptosis regulator 2	P05787	KRT8	keratin 8							O60502	OGA	O-GlcNAcase
Q13683	ITGA7	integrin subunit alpha 7				P0DKL9	ARL14EPL	ADP ribosylation factor like GTPase 14 effector protein like	P54756	EPHA5	EPH receptor A5							O94805	ACTL6B	actin like 6B
P14416	DRD2	dopamine receptor D2				P60608	ERVFC1-1	endogenous retrovirus group FC1 member 1, envelope	Q9UDV7	ZNF282	zinc finger protein 282							Q4KMZ8	NKAIN1	sodium/potassium transporting ATPase interacting 1
Q96RC9	OR8B4	olfactory receptor family 8 subfamily B member 4				Q9UPM9	B9D1	B9 domain containing 1	Q1RMZ1	BMT2	base methyltransferase of 25S rRNA 2 homolog							Q01064	PDE1B	phosphodiesterase 1B
P09466	PAEP	progestagen associated endometrial protein				Q9Y5E6	PCDHB3	protocadherin beta 3	O43252	PAPSS1	3'-phosphoadenosine 5'-phosphosulfate synthase 1							P20264	POU3F3	POU class 3 homeobox 3
Q15743	GPR68	G protein-coupled receptor 68				Q5T5M9	CCNJ	cyclin J	Q8NFU3	TSTD1	thiosulfate sulfurtransferase like domain containing 1							A0A1B0GV03	GOLGA6L7	golgin A6 family like 7
Q9GZU5	NYX	nyctalopin				Q8NET4	RTL9	retrotransposon Gag like 9	Q9H2Y7	ZNF106	zinc finger protein 106							A6NML5	TMEM212	transmembrane protein 212
Q8NDH3	NPEPL1	aminopeptidase like 1				P58317	ZNF121	zinc finger protein 121	P35244	RPA3	replication protein A3							Q9BV36	MLPH	melanophilin
A0A2R8YED5	OR5BS1P	olfactory receptor family 5 subfamily BS member 1 pseudogene				P50749	RASSF2	Ras association domain family member 2	Q9P1W9	PIM2	Pim-2 proto-oncogene, serine/threonine kinase							A7XYQ1	SOBP	sine oculis binding protein homolog
P01782	IGHV3-9	immunoglobulin heavy variable 3-9				O14933	UBE2L6	ubiquitin conjugating enzyme E2 L6	Q9UPR5	SLC8A2	solute carrier family 8 member A2							O14511	NRG2	neuregulin 2
P46952	HAAO	3-hydroxyanthranilate 3,4-dioxygenase				Q9NVW2	RLIM	ring finger protein, LIM domain interacting	Q9NQ48	LZTFL1	leucine zipper transcription factor like 1							Q6UXH0	ANGPTL8	angiopoietin like 8
A6NMS7	LRRC37A	leucine rich repeat containing 37A				Q7Z398	ZNF550	zinc finger protein 550	Q32MZ4	LRRFIP1	LRR binding FLII interacting protein 1							Q9NZJ9	NUDT4	nudix hydrolase 4
P41146	OPRL1	opioid related nociceptin receptor 1				Q86YH2	ZNF280B	zinc finger protein 280B	P13378	HOXD8	homeobox D8							O43439	CBFA2T2	CBFA2/RUNX1 partner transcriptional co-repressor 2
O75594	PGLYRP1	peptidoglycan recognition protein 1				A1L443	NUTM2F	NUT family member 2F	Q5JTV8	TOR1AIP1	torsin 1A interacting protein 1							Q9BXJ1	C1QTNF1	C1q and TNF related 1
Q99593	TBX5	T-box transcription factor 5				Q9UQ72	PSG11	pregnancy specific beta-1-glycoprotein 11	Q9Y5K3	PCYT1B	phosphate cytidylyltransferase 1B, choline							P60174	TPI1	triosephosphate isomerase 1
Q9H3H1	TRIT1	tRNA isopentenyltransferase 1				A2A3K4	PTPDC1	protein tyrosine phosphatase domain containing 1	Q9UJU6	DBNL	drebrin like							Q16719	KYNU	kynureninase
Q9NYM4	GPR83	G protein-coupled receptor 83				Q9C002	NMES1	Normal mucosa of esophagus-specific gene 1 protein (Protein FOAP-11)	Q96RT6	CTAGE1	cutaneous T cell lymphoma-associated antigen 1							O15405	TOX3	TOX high mobility group box family member 3
P17050	NAGA	alpha-N-acetylgalactosaminidase				P08047	SP1	Sp1 transcription factor	P14317	HCLS1	hematopoietic cell-specific Lyn substrate 1							A0A0B4J2H0	IGHV1-69D	immunoglobulin heavy variable 1-69D
Q9H3T2	SEMA6C	semaphorin 6C				P59817	ZNF280A	zinc finger protein 280A	Q9BXS9	SLC26A6	solute carrier family 26 member 6							Q86T23	CROCCP2	CROCC pseudogene 2
Q8TDT2	GPR152	G protein-coupled receptor 152				Q9HCN3	PGAP6	post-GPI attachment to proteins 6	Q8IXT5	RBM12B	RNA binding motif protein 12B							Q14469	HES1	hes family bHLH transcription factor 1
Q8NGX3	OR10T2	olfactory receptor family 10 subfamily T member 2				O75023	LILRB5	leukocyte immunoglobulin like receptor B5	Q05639	EEF1A2	eukaryotic translation elongation factor 1 alpha 2							Q674R7	ATG9B	autophagy related 9B
Q8NGJ2	OR52H1	olfactory receptor family 52 subfamily H member 1				Q14134	TRIM29	tripartite motif containing 29	Q9UPU7	TBC1D2B	TBC1 domain family member 2B							Q8NEP7	KLHDC9	kelch domain containing 9
Q5R3I4	TTC38	tetratricopeptide repeat domain 38				O76095	JTB	jumping translocation breakpoint	P14621	ACYP2	acylphosphatase 2							Q9HAW8	UGT1A10	UDP glucuronosyltransferase family 1 member A10
A0A0B4J1U7	IGHV6-1	immunoglobulin heavy variable 6-1				Q96A49	SYAP1	synapse associated protein 1	P56557	TMEM50B	transmembrane protein 50B							Q13451	FKBP5	FKBP prolyl isomerase 5
Q9BYF1	ACE2	angiotensin converting enzyme 2				Q9NPB3	CABP2	calcium binding protein 2	Q6ZMC9	SIGLEC15	sialic acid binding Ig like lectin 15							P20700	LMNB1	lamin B1
Q8NGI7	OR10V1	olfactory receptor family 10 subfamily V member 1				A0A0G2JMM0		Killer cell immunoglobulin-like receptor	Q15695	ZRSR2P1	ZRSR2 pseudogene 1							O95567	C22orf31	chromosome 22 open reading frame 31
O95084	PRSS23	serine protease 23				E5RJM6	ANKRD65	ankyrin repeat domain 65	Q14247	CTTN	cortactin							O95076	ALX3	ALX homeobox 3
Q8NH05	OR4Q3	olfactory receptor family 4 subfamily Q member 3				P0DJH9	RD3L	RD3 like	Q03468	ERCC6	ERCC excision repair 6, chromatin remodeling factor							Q9H8N7	ZNF395	zinc finger protein 395
Q9H756	LRRC19	leucine rich repeat containing 19				Q8TDE3	RNASE8	ribonuclease A family member 8	Q9NWD8	TMEM248	transmembrane protein 248							O14503	BHLHE40	basic helix-loop-helix family member e40
Q9NYW7	TAS2R1	taste 2 receptor member 1				Q96KR7	PHACTR3	phosphatase and actin regulator 3	O75841	UPK1B	uroplakin 1B							P43403	ZAP70	zeta chain of T cell receptor associated protein kinase 70
O43301	HSPA12A	heat shock protein family A (Hsp70) member 12A				Q7Z4K8	TRIM46	tripartite motif containing 46	Q8NEN9	PDZD8	PDZ domain containing 8							Q9Y399	MRPS2	mitochondrial ribosomal protein S2
Q9GZY0	NXF2	nuclear RNA export factor 2				P57086	SCAND1	SCAN domain containing 1	Q9NRZ9	HELLS	helicase, lymphoid specific							Q8IVD9	NUDCD3	NudC domain containing 3
Q8NC69	KCTD6	potassium channel tetramerization domain containing 6				Q6UWJ8	CD164L2	CD164 molecule like 2	Q8TE23	TAS1R2	taste 1 receptor member 2							Q05519	SRSF11	serine and arginine rich splicing factor 11
Q8NGU4	OR2I1P	olfactory receptor family 2 subfamily I member 1 pseudogene				P11488	GNAT1	G protein subunit alpha transducin 1	Q15428	SF3A2	splicing factor 3a subunit 2							Q96KP4	CNDP2	carnosine dipeptidase 2
A0A589	TRBV4-3	T cell receptor beta variable 4-3				Q05086	UBE3A	ubiquitin protein ligase E3A	A0JD36	TRDV2	T cell receptor delta variable 2							Q9UP95	SLC12A4	solute carrier family 12 member 4
Q15435	PPP1R7	protein phosphatase 1 regulatory subunit 7				Q9Y6E2	BZW2	basic leucine zipper and W2 domains 2	Q9BUN5	CCDC28B	coiled-coil domain containing 28B							Q8NHP6	MOSPD2	motile sperm domain containing 2
Q5H9L4	TAF7L	TATA-box binding protein associated factor 7 like				P17097	ZNF7	zinc finger protein 7	A0M8Q6	IGLC7	immunoglobulin lambda constant 7							Q9Y4G6	TLN2	talin 2
Q6UXM1	LRIG3	leucine rich repeats and immunoglobulin like domains 3				P48594	SERPINB4	serpin family B member 4	Q5TF21	SOGA3	Protein SOGA3							O15522	NKX2-8	NK2 homeobox 8
Q9BSA9	TMEM175	transmembrane protein 175				Q5SXH7	PLEKHS1	pleckstrin homology domain containing S1	Q7RTX1	TAS1R1	taste 1 receptor member 1							P43307	SSR1	signal sequence receptor subunit 1
P07099	EPHX1	epoxide hydrolase 1				P08185	SERPINA6	serpin family A member 6	Q6IBW4	NCAPH2	non-SMC condensin II complex subunit H2							Q8TCJ2	STT3B	STT3 oligosaccharyltransferase complex catalytic subunit B
O75712	GJB3	gap junction protein beta 3				P05106	ITGB3	integrin subunit beta 3	Q86SG3	DAZ4	deleted in azoospermia 4							Q12851	MAP4K2	mitogen-activated protein kinase kinase kinase kinase 2
Q3MIX3	ADCK5	aarF domain containing kinase 5				Q8N7M2	ZNF283	zinc finger protein 283	Q8N5S9	CAMKK1	calcium/calmodulin dependent protein kinase kinase 1							Q2M238	RRN3P1	RRN3 pseudogene 1
Q9BXM7	PINK1	PTEN induced kinase 1				P33076	CIITA	class II major histocompatibility complex transactivator	J3QSS5	TCP10L2	t-complex 10 like 2 (pseudogene)							Q8IYD1	GSPT2	G1 to S phase transition 2
Q8WZ84	OR8D1	olfactory receptor family 8 subfamily D member 1				O43704	SULT1B1	sulfotransferase family 1B member 1	P01112	HRAS	HRas proto-oncogene, GTPase							Q6UXN7	TOMM20L	translocase of outer mitochondrial membrane 20 like
Q9Y5Q5	CORIN	corin, serine peptidase				Q7Z4Q2	HEATR3	HEAT repeat containing 3	Q15493	RGN	regucalcin							A0A0J9YXQ4	PNMA6E	PNMA family member 6E
Q8N1M1	BEST3	bestrophin 3				Q4G0S4	CYP27C1	cytochrome P450 family 27 subfamily C member 1	Q8IUH3	RBM45	RNA binding motif protein 45							Q68CJ9	CREB3L3	cAMP responsive element binding protein 3 like 3
Q8N6M6	AOPEP	aminopeptidase O (putative)				P0C672	TSPAN19	tetraspanin 19	Q9BS16	CENPK	centromere protein K							Q8NBM8	PCYOX1L	prenylcysteine oxidase 1 like
Q8WY91	THAP4	THAP domain containing 4				O95858	TSPAN15	tetraspanin 15	Q9UJ83	HACL1	2-hydroxyacyl-CoA lyase 1							P18085	ARF4	ADP ribosylation factor 4
O60259	KLK8	kallikrein related peptidase 8				P31321	PRKAR1B	protein kinase cAMP-dependent type I regulatory subunit beta	Q9BSN7	TMEM204	transmembrane protein 204							Q99708	RBBP8	RB binding protein 8, endonuclease
Q9Y4L1	HYOU1	hypoxia up-regulated 1				Q9UHN6	CEMIP2	cell migration inducing hyaluronidase 2	Q9BYE0	HES7	hes family bHLH transcription factor 7							O43251	RBFOX2	RNA binding fox-1 homolog 2
Q9NY97	B3GNT2	UDP-GlcNAc:betaGal beta-1,3-N-acetylglucosaminyltransferase 2				O60563	CCNT1	cyclin T1	Q9NSB2	KRT84	keratin 84							A6NLW8	DUXA	double homeobox A
P83111	LACTB	lactamase beta				Q96NI8	ZNF570	zinc finger protein 570	P33176	KIF5B	kinesin family member 5B							Q8IUZ0	LRRC49	leucine rich repeat containing 49
Q6NS38	ALKBH2	alkB homolog 2, alpha-ketoglutarate dependent dioxygenase				Q9BZ71	PITPNM3	PITPNM family member 3	Q53LP3	SOWAHC	sosondowah ankyrin repeat domain family member C							P62820	RAB1A	RAB1A, member RAS oncogene family
O43927	CXCL13	C-X-C motif chemokine ligand 13				Q96JB5	CDK5RAP3	CDK5 regulatory subunit associated protein 3	Q86YD3	TMEM25	transmembrane protein 25							Q9BV38	WDR18	WD repeat domain 18
P43220	GLP1R	glucagon like peptide 1 receptor				Q8IZF5	ADGRF3	adhesion G protein-coupled receptor F3	Q96D31	ORAI1	ORAI calcium release-activated calcium modulator 1							Q9NZC3	GDE1	glycerophosphodiester phosphodiesterase 1
Q14954	KIR2DS1	killer cell immunoglobulin like receptor, two Ig domains and short cytoplasmic tail 1				A4FU01	MTMR11	myotubularin related protein 11	Q9H334	FOXP1	forkhead box P1							Q06455	RUNX1T1	RUNX1 partner transcriptional co-repressor 1
Q6IEU7	OR5M10	olfactory receptor family 5 subfamily M member 10				Q6ZV29	PNPLA7	patatin like phospholipase domain containing 7	P49761	CLK3	CDC like kinase 3							O95343	SIX3	SIX homeobox 3
Q03431	PTH1R	parathyroid hormone 1 receptor				P23415	GLRA1	glycine receptor alpha 1	Q8WZ04	TOMT	transmembrane O-methyltransferase							O60307	MAST3	microtubule associated serine/threonine kinase 3
Q0VG06	FAAP100	FA core complex associated protein 100				P49638	TTPA	alpha tocopherol transfer protein	Q8NDX5	PHC3	polyhomeotic homolog 3							O43709	BUD23	BUD23 rRNA methyltransferase and ribosome maturation factor
Q8NH42	OR4K13	olfactory receptor family 4 subfamily K member 13				Q92664	GTF3A	general transcription factor IIIA	Q14511	NEDD9	neural precursor cell expressed, developmentally down-regulated 9							Q9BZK7	TBL1XR1	TBL1X/Y related 1
P40425	PBX2	PBX homeobox 2				Q9C000	NLRP1	NLR family pyrin domain containing 1	Q6ZS10	CLEC17A	C-type lectin domain containing 17A							Q96M60	FAM227B	family with sequence similarity 227 member B
Q8NGZ5	OR2G2	olfactory receptor family 2 subfamily G member 2				P31944	CASP14	caspase 14	Q9BQ15	NABP2	nucleic acid binding protein 2							Q9BXX2	ANKRD30B	ankyrin repeat domain 30B
Q13829	TNFAIP1	TNF alpha induced protein 1				A6NGJ6	TRIM64	tripartite motif containing 64	Q8IY51	TIGD4	tigger transposable element derived 4							Q99608	NDN	necdin, MAGE family member
P49863	GZMK	granzyme K				Q9NR63	CYP26B1	cytochrome P450 family 26 subfamily B member 1	O94986	CEP152	centrosomal protein 152							P54845	NRL	neural retina leucine zipper
Q5VUJ6	LRCH2	leucine rich repeats and calponin homology domain containing 2				P49802	RGS7	regulator of G protein signaling 7	Q5BJE1	CCDC178	coiled-coil domain containing 178							Q9NR50	EIF2B3	eukaryotic translation initiation factor 2B subunit gamma
O15040	TECPR2	tectonin beta-propeller repeat containing 2				Q7Z6Z7	HUWE1	HECT, UBA and WWE domain containing E3 ubiquitin protein ligase 1	P17600	SYN1	synapsin I							O95199	RCBTB2	RCC1 and BTB domain containing protein 2
P08311	CTSG	cathepsin G				Q9Y2J8	PADI2	peptidyl arginine deiminase 2	P22894	MMP8	matrix metallopeptidase 8							Q5T5S1	CCDC183	coiled-coil domain containing 183
Q8NGG7	OR8A1	olfactory receptor family 8 subfamily A member 1				O43921	EFNA2	ephrin A2	Q6QEF8	CORO6	coronin 6							Q86VR2	RETREG3	reticulophagy regulator family member 3
Q8NGV0	OR2Y1	olfactory receptor family 2 subfamily Y member 1				Q9H3R1	NDST4	N-deacetylase and N-sulfotransferase 4	Q16352	INA	internexin neuronal intermediate filament protein alpha							Q8NBI5	SLC43A3	solute carrier family 43 member 3
Q8N954	GPATCH11	G-patch domain containing 11				Q96M20	CNBD2	cyclic nucleotide binding domain containing 2	Q8N8L6	ARL10	ADP ribosylation factor like GTPase 10							Q96FN9	DTD2	D-aminoacyl-tRNA deacylase 2
P13232	IL7	interleukin 7				Q9UKT7	FBXL3	F-box and leucine rich repeat protein 3	O60763	USO1	USO1 vesicle transport factor							H3BNL8	ARMH2	armadillo like helical domain containing 2
Q8NH83	OR4A5	olfactory receptor family 4 subfamily A member 5				Q96T54	KCNK17	potassium two pore domain channel subfamily K member 17	Q9Y4P8	WIPI2	WD repeat domain, phosphoinositide interacting 2							Q96K80	ZC3H10	zinc finger CCCH-type containing 10
O75936	BBOX1	gamma-butyrobetaine hydroxylase 1				O95780	ZNF682	zinc finger protein 682	Q02790	FKBP4	FKBP prolyl isomerase 4							Q5DJT8	CT45A2	cancer/testis antigen family 45 member A2
Q49AM3	TTC31	tetratricopeptide repeat domain 31				Q3LFD5	USP41	Putative ubiquitin carboxyl-terminal hydrolase 41 (EC 3.4.19.12) (Deubiquitinating enzyme 41) (Ubiquitin thioesterase 41) (Ubiquitin-specific-processing protease 41)	Q13242	SRSF9	serine and arginine rich splicing factor 9							Q9NP74	PALMD	palmdelphin
P29762	CRABP1	cellular retinoic acid binding protein 1				Q3MIS6	ZNF528	zinc finger protein 528	Q8IX90	SKA3	spindle and kinetochore associated complex subunit 3							Q9UJ70	NAGK	N-acetylglucosamine kinase
Q9H205	OR2AG1	olfactory receptor family 2 subfamily AG member 1				Q5DT21	SPINK9	serine peptidase inhibitor Kazal type 9	A0A1B0GTZ2	CCDC196	coiled-coil domain containing 196							Q5T9A4	ATAD3B	ATPase family AAA domain containing 3B
O15393	TMPRSS2	transmembrane serine protease 2				O14645	DNALI1	dynein axonemal light intermediate chain 1	Q9H628	RERGL	RERG like							P08670	VIM	vimentin
Q8NH61	OR51F2	olfactory receptor family 51 subfamily F member 2				Q7RTN6	STRADA	STE20 related adaptor alpha	P02008	HBZ	hemoglobin subunit zeta							P51800	CLCNKA	chloride voltage-gated channel Ka
A0A087WZ39	TRBV15	T cell receptor beta variable 15				Q7L592	NDUFAF7	NADH:ubiquinone oxidoreductase complex assembly factor 7	P53041	PPP5C	protein phosphatase 5 catalytic subunit							Q12770	SCAP	SREBF chaperone
P20592	MX2	MX dynamin like GTPase 2				Q86WG5	SBF2	SET binding factor 2	Q7LC44	ARC	activity regulated cytoskeleton associated protein							Q8NG04	SLC26A10P	solute carrier family 26 member 10, pseudogene
Q6PJG9	LRFN4	leucine rich repeat and fibronectin type III domain containing 4				Q9NS56	TOPORS	TOP1 binding arginine/serine rich protein, E3 ubiquitin ligase	Q9NUN5	LMBRD1	LMBR1 domain containing 1							A0A075B6K4	IGLV3-10	immunoglobulin lambda variable 3-10
Q86UT5	PDZD3	Na(+)/H(+) exchange regulatory cofactor NHE-RF4 (NHERF-4) (Intestinal and kidney-enriched PDZ protein) (Natrium-phosphate cotransporter IIa C-terminal-associated protein 2) (Na/Pi cotransporter C-terminal-associated protein 2) (NaPi-Cap2) (PDZ domain-containing protein 2) (PDZ domain-containing protein 3) (Sodium-hydrogen exchanger regulatory factor 4)				Q8N475	FSTL5	follistatin like 5	Q96QU4	FRG2B	FSHD region gene 2 family member B							P28223	HTR2A	5-hydroxytryptamine receptor 2A
O60861	GAS7	growth arrest specific 7				B4DU55	ZNF879	zinc finger protein 879	P51553	IDH3G	isocitrate dehydrogenase (NAD(+)) 3 non-catalytic subunit gamma							P60763	RAC3	Rac family small GTPase 3
P01814	IGHV2-70	immunoglobulin heavy variable 2-70				O00186	STXBP3	syntaxin binding protein 3	A8MWX3	WASH4P	WASP family homolog 4, pseudogene							Q6PD62	CTR9	CTR9 homolog, Paf1/RNA polymerase II complex component
O00574	CXCR6	C-X-C motif chemokine receptor 6				P78504	JAG1	jagged canonical Notch ligand 1	Q9P0V9	SEPTIN10	septin 10							Q13144	EIF2B5	eukaryotic translation initiation factor 2B subunit epsilon
Q5EB52	MEST	mesoderm specific transcript				O15091	PRORP	protein only RNase P catalytic subunit	Q9UIB8	CD84	CD84 molecule							P51790	CLCN3	chloride voltage-gated channel 3
Q8N357	SLC35F6	solute carrier family 35 member F6				P16284	PECAM1	platelet and endothelial cell adhesion molecule 1	Q8N4Y2	CRACR2B	calcium release activated channel regulator 2B							Q9BVC6	TMEM109	transmembrane protein 109
Q8NGY6	OR6N2	olfactory receptor family 6 subfamily N member 2				Q9UBC5	MYO1A	myosin IA	Q8NFH3	NUP43	nucleoporin 43							Q4KMZ1	IQCC	IQ motif containing C
Q9Y3P4	RHBDD3	rhomboid domain containing 3				Q765P7	MTSS2	MTSS I-BAR domain containing 2	Q9BYV9	BACH2	BTB domain and CNC homolog 2							Q7Z5D8	NANOGNB	NANOG neighbor homeobox
Q9UBD3	XCL2	X-C motif chemokine ligand 2				Q9UL36	ZNF236	zinc finger protein 236	Q9Y2Y6	TMEM98	transmembrane protein 98							Q6GV28	TMEM225	transmembrane protein 225
O43781	DYRK3	dual specificity tyrosine phosphorylation regulated kinase 3				Q2M2D7	TBC1D28	TBC1 domain family member 28	O75828	CBR3	carbonyl reductase 3							Q96II8	LRCH3	leucine rich repeats and calponin homology domain containing 3
Q8N5M4	TTC9C	tetratricopeptide repeat domain 9C				Q9Y4G2	PLEKHM1	pleckstrin homology and RUN domain containing M1	P12955	PEPD	peptidase D							O95817	BAG3	BAG cochaperone 3
Q9NUP9	LIN7C	lin-7 homolog C, crumbs cell polarity complex component				Q9Y3U8	RPL36	ribosomal protein L36	P0DJI9	SAA2	serum amyloid A2							Q7Z478	DHX29	DExH-box helicase 29
Q9H4D5	NXF3	nuclear RNA export factor 3				Q6UW15	REG3G	regenerating family member 3 gamma	A6NNA5	DRGX	dorsal root ganglia homeobox							Q86VH2	KIF27	kinesin family member 27
P22891	PROZ	protein Z, vitamin K dependent plasma glycoprotein				P51828	ADCY7	adenylate cyclase 7	Q9H3T3	SEMA6B	semaphorin 6B							P0C1S8	WEE2	WEE2 oocyte meiosis inhibiting kinase
Q8NGK0	OR51G2	olfactory receptor family 51 subfamily G member 2				Q3B8N2	LGALS9B	galectin 9B	Q8TC36	SUN5	Sad1 and UNC84 domain containing 5							Q9HC07	TMEM165	transmembrane protein 165
O94888	UBXN7	UBX domain protein 7				Q14669-2	TRIP12	thyroid hormone receptor interactor 12	Q02094	RHAG	Rh associated glycoprotein							Q9Y3E0	GOLT1B	golgi transport 1B
Q96P65	QRFPR	pyroglutamylated RFamide peptide receptor				Q10471	GALNT2	polypeptide N-acetylgalactosaminyltransferase 2	Q8N9T8	KRI1	KRI1 homolog							Q8WWH5	TRUB1	TruB pseudouridine synthase family member 1
Q8TEW8	PARD3B	par-3 family cell polarity regulator beta				Q7Z7G1	CLNK	cytokine dependent hematopoietic cell linker	Q9NQI0	DDX4	DEAD-box helicase 4							Q12934	BFSP1	beaded filament structural protein 1
Q9HA64	FN3KRP	fructosamine 3 kinase related protein				P99999	CYCS	cytochrome c, somatic	P55318	FOXA3	forkhead box A3							Q8NDV7	TNRC6A	trinucleotide repeat containing adaptor 6A
O95897	OLFM2	olfactomedin 2				Q9UHL9	GTF2IRD1	GTF2I repeat domain containing 1	Q8WWM9	CYGB	cytoglobin							Q6IQ20	NAPEPLD	N-acyl phosphatidylethanolamine phospholipase D
Q6NSI1	ANKRD26P1	ankyrin repeat domain 26 pseudogene 1				Q96IR2	ZNF845	zinc finger protein 845	P0DP23	CALM1	calmodulin 1							Q8N3C7	CLIP4	CAP-Gly domain containing linker protein family member 4
P05000	IFNW1	interferon omega 1				P10242	MYB	MYB proto-oncogene, transcription factor	P16152	CBR1	carbonyl reductase 1							Q13117	DAZ2	deleted in azoospermia 2
P21730	C5AR1	complement C5a receptor 1				P43250	GRK6	G protein-coupled receptor kinase 6	Q9UBR5	CKLF	chemokine like factor							P14780	MMP9	matrix metallopeptidase 9
Q9WJR5	ERVK-19	endogenous retrovirus group K member 19, envelope				Q8NCC3	PLA2G15	phospholipase A2 group XV	Q00535	CDK5	cyclin dependent kinase 5							O75791	GRAP2	GRB2 related adaptor protein 2
P38398	BRCA1	BRCA1 DNA repair associated				Q96JQ2	CLMN	calmin	Q96PB7	OLFM3	olfactomedin 3							Q86XP1	DGKH	diacylglycerol kinase eta
O14939	PLD2	phospholipase D2				Q53T94	TAF1B	TATA-box binding protein associated factor, RNA polymerase I subunit B	O75146	HIP1R	huntingtin interacting protein 1 related							Q9P2K8	EIF2AK4	eukaryotic translation initiation factor 2 alpha kinase 4
Q9NST1	PNPLA3	patatin like phospholipase domain containing 3				O75882	ATRN	attractin	A0A075B6S4	IGKV1D-17	immunoglobulin kappa variable 1D-17							Q8N126	CADM3	cell adhesion molecule 3
Q8N3F0	MTURN	maturin, neural progenitor differentiation regulator homolog				Q9P0M4	IL17C	interleukin 17C	Q01085	TIAL1	TIA1 cytotoxic granule associated RNA binding protein like 1							Q6P4I2	WDR73	WD repeat domain 73
Q9NP77	SSU72	SSU72 homolog, RNA polymerase II CTD phosphatase				P03973	SLPI	secretory leukocyte peptidase inhibitor	Q7Z7N9	TMEM179B	transmembrane protein 179B							Q9BVL2	NUP58	nucleoporin 58
P08637	FCGR3A	Fc gamma receptor IIIa				Q7Z7L7	ZER1	zyg-11 related cell cycle regulator	P31943	HNRNPH1	heterogeneous nuclear ribonucleoprotein H1							O95297	MPZL1	myelin protein zero like 1
P0C604	OR4A8	olfactory receptor family 4 subfamily A member 8 (gene/pseudogene)				Q5VTB9	RNF220	ring finger protein 220	Q16348	SLC15A2	solute carrier family 15 member 2							Q9H4B8	DPEP3	dipeptidase 3
Q8IYQ7	THNSL1	threonine synthase like 1				Q9BXB7	SPATA16	spermatogenesis associated 16	P0C7I6	CCDC159	coiled-coil domain containing 159							Q659C4	LARP1B	La ribonucleoprotein 1B
P49327	FASN	fatty acid synthase				Q9UK58	CCNL1	cyclin L1	P00519	ABL1	ABL proto-oncogene 1, non-receptor tyrosine kinase							Q13349	ITGAD	integrin subunit alpha D
Q9BSH4	TACO1	translational activator of cytochrome c oxidase I				Q9NZQ3	NCKIPSD	NCK interacting protein with SH3 domain	O75367	MACROH2A1	macroH2A.1 histone							A0A0C4DH31	IGHV1-18	immunoglobulin heavy variable 1-18
P54727	RAD23B	RAD23 homolog B, nucleotide excision repair protein				Q96ER3	SAAL1	serum amyloid A like 1	O95835	LATS1	large tumor suppressor kinase 1							Q5CZ79	ANKRD20A8P	ankyrin repeat domain 20 family member A8, pseudogene
P13945	ADRB3	adrenoceptor beta 3				O95487	SEC24B	SEC24 homolog B, COPII coat complex component	E2RYF6	MUC22	mucin 22							Q6T423	SLC22A25	solute carrier family 22 member 25
P49286	MTNR1B	melatonin receptor 1B				Q9NQ30	ESM1	endothelial cell specific molecule 1	P47897	QARS1	glutaminyl-tRNA synthetase 1							P50135	HNMT	histamine N-methyltransferase
Q8IYL2	TRMT44	tRNA methyltransferase 44 homolog				Q15238	PSG5	pregnancy specific beta-1-glycoprotein 5	P13645	KRT10	keratin 10							P84095	RHOG	ras homolog family member G
Q6TCH7	PAQR3	progestin and adipoQ receptor family member 3				P05155	SERPING1	serpin family G member 1	P04181	OAT	ornithine aminotransferase							Q99418	CYTH2	cytohesin 2
P31930	UQCRC1	ubiquinol-cytochrome c reductase core protein 1				Q07890	SOS2	SOS Ras/Rho guanine nucleotide exchange factor 2	Q99626	CDX2	caudal type homeobox 2							Q8WWI1	LMO7	LIM domain 7
Q9NP55	BPIFA1	BPI fold containing family A member 1				Q7Z3B4	NUP54	nucleoporin 54	P51801	CLCNKB	chloride voltage-gated channel Kb							Q9NV12	TMEM140	transmembrane protein 140
Q96SI9	STRBP	spermatid perinuclear RNA binding protein				Q8NC67	NETO2	neuropilin and tolloid like 2	Q9HCN4	GPN1	GPN-loop GTPase 1							P39880	CUX1	cut like homeobox 1
P07902	GALT	galactose-1-phosphate uridylyltransferase				P29122	PCSK6	proprotein convertase subtilisin/kexin type 6	Q9GZZ9	UBA5	ubiquitin like modifier activating enzyme 5							Q12981	BNIP1	BCL2 interacting protein 1
Q8NGN7	OR10D4P	olfactory receptor family 10 subfamily D member 4 pseudogene				Q6PJG6	BRAT1	BRCA1 associated ATM activator 1	B3KU38	IQCJ-SCHIP1	IQCJ-SCHIP1 readthrough							Q6PK57	DNM1P34	dynamin 1 pseudogene 34
Q8NH59	OR51Q1	olfactory receptor family 51 subfamily Q member 1				Q969Y0	NXPE3	neurexophilin and PC-esterase domain family member 3	Q12834	CDC20	cell division cycle 20							Q13685	AAMP	angio associated migratory cell protein
Q8TF42	UBASH3B	ubiquitin associated and SH3 domain containing B				Q6P575	GUSBP11	GUSB pseudogene 11	Q99581	FEV	FEV transcription factor, ETS family member							Q9NUV7	SPTLC3	serine palmitoyltransferase long chain base subunit 3
Q9Y6Y1	CAMTA1	calmodulin binding transcription activator 1				Q96MN2	NLRP4	NLR family pyrin domain containing 4	Q9BUJ0	ABHD14A	abhydrolase domain containing 14A							Q8TBA6	GOLGA5	golgin A5
Q7L273	KCTD9	potassium channel tetramerization domain containing 9				Q8IZ07	ANKRD13A	ankyrin repeat domain 13A	Q9BPX3	NCAPG	non-SMC condensin I complex subunit G							Q9BUR4	WRAP53	WD repeat containing antisense to TP53
Q9NX18	SDHAF2	succinate dehydrogenase complex assembly factor 2				Q9Y3R5	DOP1B	DOP1 leucine zipper like protein B	Q3KNW5	SLC10A6	solute carrier family 10 member 6							Q96M91	CFAP53	cilia and flagella associated protein 53
Q9NUZ1	ACOXL	acyl-CoA oxidase like				P17252	PRKCA	protein kinase C alpha	Q8NDG6	TDRD9	tudor domain containing 9							Q16543	CDC37	cell division cycle 37, HSP90 cochaperone
P21728	DRD1	dopamine receptor D1				O14525	ASTN1	astrotactin 1	Q96JQ5	MS4A4A	membrane spanning 4-domains A4A							Q92186	ST8SIA2	ST8 alpha-N-acetyl-neuraminide alpha-2,8-sialyltransferase 2
P00751	CFB	complement factor B				Q8WXK1	ASB15	ankyrin repeat and SOCS box containing 15	Q5VT52	RPRD2	regulation of nuclear pre-mRNA domain containing 2							Q02952	AKAP12	A-kinase anchoring protein 12
Q6UXU4	GSG1L	GSG1 like				Q03164	KMT2A	lysine methyltransferase 2A	O43148	RNMT	RNA guanine-7 methyltransferase							Q9C075	KRT23	keratin 23
Q9P0P8	MTRES1	mitochondrial transcription rescue factor 1				Q9H3R0	KDM4C	lysine demethylase 4C	Q9NX45	SOHLH2	spermatogenesis and oogenesis specific basic helix-loop-helix 2							O00258	GET1	guided entry of tail-anchored proteins factor 1
O60412	OR7C2	olfactory receptor family 7 subfamily C member 2				P01591	JCHAIN	joining chain of multimeric IgA and IgM	O95292	VAPB	VAMP associated protein B and C							Q96JK2	DCAF5	DDB1 and CUL4 associated factor 5
O95793	STAU1	staufen double-stranded RNA binding protein 1				P07858	CTSB	cathepsin B	P04049	RAF1	Raf-1 proto-oncogene, serine/threonine kinase							Q9H2J7	SLC6A15	solute carrier family 6 member 15
P35346	SSTR5	somatostatin receptor 5				O43920	NDUFS5	NADH:ubiquinone oxidoreductase subunit S5	Q6ZRC1	C4orf50	chromosome 4 open reading frame 50							O00445	SYT5	synaptotagmin 5
Q9H340	OR51B6	olfactory receptor family 51 subfamily B member 6				Q6B0B8	TIGD3	tigger transposable element derived 3	Q63HQ0	AP1AR	adaptor related protein complex 1 associated regulatory protein							Q9NW82	WDR70	WD repeat domain 70
O94813	SLIT2	slit guidance ligand 2				P27216	ANXA13	annexin A13	A8MTQ0	NOTO	notochord homeobox							P03915	MT-ND5	mitochondrially encoded NADH:ubiquinone oxidoreductase core subunit 5
Q9H3S3	TMPRSS5	transmembrane serine protease 5				Q5H9U9	DDX60L	DExD/H-box 60 like	Q9C099	LRRCC1	leucine rich repeat and coiled-coil centrosomal protein 1							Q9H8H2	DDX31	DEAD-box helicase 31
Q9NV64	TMEM39A	transmembrane protein 39A				Q86TI0	TBC1D1	TBC1 domain family member 1	O95500	CLDN14	claudin 14							Q9UHI6	DDX20	DEAD-box helicase 20
P30874	SSTR2	somatostatin receptor 2				Q9HBL0	TNS1	tensin 1	Q8N4C8	MINK1	misshapen like kinase 1							Q6ZTU2	EP400P1	EP400 pseudogene 1
P0C7N1	OR8U8	olfactory receptor family 8 subfamily U member 8				Q92843	BCL2L2	BCL2 like 2	P35249	RFC4	replication factor C subunit 4							Q8NE65	ZNF738	zinc finger protein 738
P16473	TSHR	thyroid stimulating hormone receptor				Q7Z614	SNX20	sorting nexin 20	P08727	KRT19	keratin 19							Q2NL98	VMAC	vimentin type intermediate filament associated coiled-coil protein
Q8NFU1	BEST2	bestrophin 2				Q9BRQ0	PYGO2	pygopus family PHD finger 2	O43812	DUX1	double homeobox 1							Q96PC5	MIA2	MIA SH3 domain ER export factor 2
O15178	TBXT	T-box transcription factor T				Q96K17	BTF3L4	basic transcription factor 3 like 4	Q14207	NPAT	nuclear protein, coactivator of histone transcription							Q53H80	AKIRIN2	akirin 2
A0A0U1RQE8	GLYATL1B	glycine-N-acyltransferase like 1B				Q9UPQ7	PDZRN3	PDZ domain containing ring finger 3	O95755	RAB36	RAB36, member RAS oncogene family							Q86TM3	DDX53	DEAD-box helicase 53
P58557	YBEY	ybeY metalloendoribonuclease				Q8WUM0	NUP133	nucleoporin 133	Q9UEY8	ADD3	adducin 3							Q9UK96	FBXO10	F-box protein 10
Q96B21	TMEM45B	transmembrane protein 45B				Q92854	SEMA4D	semaphorin 4D	P17947	SPI1	Spi-1 proto-oncogene							Q13111	CHAF1A	chromatin assembly factor 1 subunit A
Q06278	AOX1	aldehyde oxidase 1				P50995	ANXA11	annexin A11	P62829	RPL23	ribosomal protein L23							Q9H6R7	WDCP	WD repeat and coiled coil containing
P21399	ACO1	aconitase 1				Q9Y2U2	KCNK7	potassium two pore domain channel subfamily K member 7	Q5M9Q1	NKAPL	NFKB activating protein like							Q86VL8	SLC47A2	solute carrier family 47 member 2
P04179	SOD2	superoxide dismutase 2				Q8IVV2	LOXHD1	lipoxygenase homology PLAT domains 1	Q8N365	CIART	circadian associated repressor of transcription							Q14012	CAMK1	calcium/calmodulin dependent protein kinase I
Q7RTP0	NIPA1	NIPA magnesium transporter 1				P10072	ZNF875	zinc finger protein 875	O95544	NADK	NAD kinase							O15194	CTDSPL	CTD small phosphatase like
Q8NDW8	TTC21A	tetratricopeptide repeat domain 21A				Q9UHY8	FEZ2	fasciculation and elongation protein zeta 2	Q9BRJ7	NUDT16L1	nudix hydrolase 16 like 1							P20701	ITGAL	integrin subunit alpha L
A0A1B0GUV8	LOC102723971	Lipocln_cytosolic_FA-bd_dom domain-containing protein				P0CF75	EBLN1	endogenous Bornavirus like nucleoprotein 1	Q86YR5	GPSM1	G protein signaling modulator 1							P0DMS9	TMIGD3	transmembrane and immunoglobulin domain containing 3
Q6DT37	CDC42BPG	CDC42 binding protein kinase gamma				Q7L7L0	H2AC25	H2A clustered histone 25	P0DMV0	CT45A7	cancer/testis antigen family 45 member A7							Q9BQD3	KXD1	KxDL motif containing 1
P08263	GSTA1	glutathione S-transferase alpha 1				P01909	HLA-DQA1	major histocompatibility complex, class II, DQ alpha 1	P54852	EMP3	epithelial membrane protein 3							O76021	RSL1D1	ribosomal L1 domain containing 1
Q8NGR1	OR13A1	olfactory receptor family 13 subfamily A member 1				P02585	TNNC2	troponin C2, fast skeletal type	P15408	FOSL2	FOS like 2, AP-1 transcription factor subunit							Q9Y2R0	COA3	cytochrome c oxidase assembly factor 3
Q8NH49	OR4X1	olfactory receptor family 4 subfamily X member 1				Q6ZUG5		Uncharacterized protein FLJ43738	A0A0C4DH41	IGHV4-61	immunoglobulin heavy variable 4-61							Q92737	RASL10A	RAS like family 10 member A
P51582	P2RY4	pyrimidinergic receptor P2Y4				Q9C0B5	ZDHHC5	zinc finger DHHC-type palmitoyltransferase 5	Q8NG68	TTL	tubulin tyrosine ligase							O14519	CDK2AP1	cyclin dependent kinase 2 associated protein 1
Q13639	HTR4	5-hydroxytryptamine receptor 4				Q8NGN1	OR6T1	olfactory receptor family 6 subfamily T member 1	P28069	POU1F1	POU class 1 homeobox 1							O95873	C6orf47	chromosome 6 open reading frame 47
Q86WI0	LHFPL1	LHFPL tetraspan subfamily member 1				Q902F9	HERVK_113	Endogenous retrovirus group K member 113 Env polyprotein (EnvK5 protein) (Envelope polyprotein) (HERV-K113 envelope protein) (HERV-K_19p13.11 provirus ancestral Env polyprotein) [Cleaved into: Surface protein (SU); Transmembrane protein (TM)]	P19013	KRT4	keratin 4							Q9UK41	VPS28	VPS28 subunit of ESCRT-I
Q6ZYL4	GTF2H5	general transcription factor IIH subunit 5				Q9P273	TENM3	teneurin transmembrane protein 3	P49961	ENTPD1	ectonucleoside triphosphate diphosphohydrolase 1							P07311	ACYP1	acylphosphatase 1
Q96CH1	GPR146	G protein-coupled receptor 146				Q5SRR4	LY6G5C	lymphocyte antigen 6 family member G5C	P30050	RPL12	ribosomal protein L12							Q13523	PRPF4B	pre-mRNA processing factor 4B
Q6P9F7	LRRC8B	leucine rich repeat containing 8 VRAC subunit B				Q96FN5	KIF12	kinesin family member 12	O43159	RRP8	ribosomal RNA processing 8							Q92187	ST8SIA4	ST8 alpha-N-acetyl-neuraminide alpha-2,8-sialyltransferase 4
P00734	F2	coagulation factor II, thrombin				P02458	COL2A1	collagen type II alpha 1 chain	Q8N1A0	KRT222	keratin 222							A6NI87	CBY3	chibby family member 3
P02763	ORM1	orosomucoid 1				Q9H9P2	CHODL	chondrolectin	P0CB38	PABPC4L	poly(A) binding protein cytoplasmic 4 like							Q8NBW4	SLC38A9	solute carrier family 38 member 9
Q8IUR6	CREBRF	CREB3 regulatory factor				O76064	RNF8	ring finger protein 8	Q7RTT9	SLC29A4	solute carrier family 29 member 4							Q9NSI8	SAMSN1	SAM domain, SH3 domain and nuclear localization signals 1
Q8IUC4	RHPN2	rhophilin Rho GTPase binding protein 2				Q9NW81	DMAC2	distal membrane arm assembly component 2	Q8WYH8	ING5	inhibitor of growth family member 5							Q8IYT4	KATNAL2	katanin catalytic subunit A1 like 2
Q96BZ4	PLD4	phospholipase D family member 4				Q9P243	ZFAT	zinc finger and AT-hook domain containing	Q6NY19	KANK3	KN motif and ankyrin repeat domains 3							Q01658	DR1	down-regulator of transcription 1
P0C617	OR5AL1	olfactory receptor family 5 subfamily AL member 1 (gene/pseudogene)				Q7RTU9	STRC	stereocilin	Q9NR00	TCIM	transcriptional and immune response regulator							Q8WUS8	SDR42E1	short chain dehydrogenase/reductase family 42E, member 1
Q03395	ROM1	retinal outer segment membrane protein 1				A4FU69	EFCAB5	EF-hand calcium binding domain 5	O75426	FBXO24	F-box protein 24							P57059	SIK1	salt inducible kinase 1
Q86WC6	PPP1R27	protein phosphatase 1 regulatory subunit 27				Q9NVC6	MED17	mediator complex subunit 17	Q3MJ40	CCDC144BP	coiled-coil domain containing 144B, pseudogene							E9PJI5	NPIPA7	nuclear pore complex interacting protein family member A7
Q6P087	RPUSD3	RNA pseudouridine synthase D3				A0FGR9	ESYT3	extended synaptotagmin 3	Q6A163	KRT39	keratin 39							Q9ULI2	RIMKLB	ribosomal modification protein rimK like family member B
Q9UJD0	RIMS3	regulating synaptic membrane exocytosis 3				Q9UGC6	RGS17	regulator of G protein signaling 17	P28715	ERCC5	ERCC excision repair 5, endonuclease							A0A0B4J2B6	IGHV2OR16-5	immunoglobulin heavy variable 2/OR16-5 (non-functional)
Q8NHC6	OR14L1P	Putative olfactory receptor 14L1 (Putative olfactory receptor 5AV1)				Q9NVN3	RIC8B	RIC8 guanine nucleotide exchange factor B	Q9BTE0	NAT9	N-acetyltransferase 9 (putative)							Q8WXI9	GATAD2B	GATA zinc finger domain containing 2B
Q15024	EXOSC7	exosome component 7				Q13330	MTA1	metastasis associated 1	A4D1P6	WDR91	WD repeat domain 91							P14868	DARS1	aspartyl-tRNA synthetase 1
Q9UNI1	CELA1	chymotrypsin like elastase 1				Q9Y4C5	CHST2	carbohydrate sulfotransferase 2	Q9UK32	RPS6KA6	ribosomal protein S6 kinase A6							Q16623	STX1A	syntaxin 1A
Q92743	HTRA1	HtrA serine peptidase 1				Q96M96	FGD4	FYVE, RhoGEF and PH domain containing 4	Q9Y657	SPIN1	spindlin 1							P68104	EEF1A1	eukaryotic translation elongation factor 1 alpha 1
P18089	ADRA2B	adrenoceptor alpha 2B				P48960	ADGRE5	adhesion G protein-coupled receptor E5	Q8WZ42	TTN	titin							Q96L34	MARK4	microtubule affinity regulating kinase 4
Q96DR4	STARD4	StAR related lipid transfer domain containing 4				Q00537	CDK17	cyclin dependent kinase 17	A0A0B4J1W7	NPIPA9	nuclear pore complex interacting protein family, member A9							Q02575	NHLH1	nescient helix-loop-helix 1
Q9NYP7	ELOVL5	ELOVL fatty acid elongase 5				Q9NR21	PARP11	poly(ADP-ribose) polymerase family member 11	A6NFF2	NAP1L6P	nucleosome assembly protein 1 like 6, pseudogene							Q86V48	LUZP1	leucine zipper protein 1
Q13087	PDIA2	protein disulfide isomerase family A member 2				Q9HC78	ZBTB20	zinc finger and BTB domain containing 20	O60271	SPAG9	sperm associated antigen 9							Q92974	ARHGEF2	Rho/Rac guanine nucleotide exchange factor 2
Q13164	MAPK7	mitogen-activated protein kinase 7				Q8N8Z6	DCBLD1	discoidin, CUB and LCCL domain containing 1	Q15738	NSDHL	NAD(P) dependent steroid dehydrogenase-like							Q14863	POU6F1	POU class 6 homeobox 1
Q9Y696	CLIC4	chloride intracellular channel 4				Q9BX59	TAPBPL	TAP binding protein like	P51956	NEK3	NIMA related kinase 3							P78346	RPP30	ribonuclease P/MRP subunit p30
Q9P2V4	LRIT1	leucine rich repeat, Ig-like and transmembrane domains 1				Q9BZY9	TRIM31	tripartite motif containing 31	P62314	SNRPD1	small nuclear ribonucleoprotein D1 polypeptide							Q5SSJ5	HP1BP3	heterochromatin protein 1 binding protein 3
Q16822	PCK2	phosphoenolpyruvate carboxykinase 2, mitochondrial				Q08188	TGM3	transglutaminase 3	P31327	CPS1	carbamoyl-phosphate synthase 1							Q8NEV9	IL27	interleukin 27
Q8NGU9	GPR150	G protein-coupled receptor 150				Q9Y471	CMAHP	cytidine monophospho-N-acetylneuraminic acid hydroxylase, pseudogene	Q9UBM8	MGAT4C	MGAT4 family member C							P62491	RAB11A	RAB11A, member RAS oncogene family
O95881	TXNDC12	thioredoxin domain containing 12				Q8TAC2	JOSD2	Josephin domain containing 2	Q8WVP7	LMBR1	limb development membrane protein 1							Q8IXW0	LMNTD2	lamin tail domain containing 2
Q8NGY7	OR10J6P	olfactory receptor family 10 subfamily J member 6 pseudogene				P15621	ZNF44	zinc finger protein 44	Q9NPA1	KCNMB3	potassium calcium-activated channel subfamily M regulatory beta subunit 3							Q6NUT3	MFSD12	major facilitator superfamily domain containing 12
Q8IXF9	AQP12A	aquaporin 12A				P63124	HERV-K104	Endogenous retrovirus group K member 104 Pro protein (HERV-K104 Pro protein) (HERV-K_5q13.3 provirus ancestral Pro protein) (EC 3.4.23.50) (Protease) (Proteinase) (PR)	A6NFC5	TMEM235	transmembrane protein 235							Q14714	SSPN	sarcospan
P58005	SESN3	sestrin 3				Q9NU63	ZFP57	ZFP57 zinc finger protein	Q6ZMD2	SPNS3	SPNS lysolipid transporter 3, sphingosine-1-phosphate (putative)							Q8NDY3	ADPRHL1	ADP-ribosylhydrolase like 1
Q8NH57	OR52P1	olfactory receptor family 52 subfamily P member 1 (gene/pseudogene)				Q7LBC6	KDM3B	lysine demethylase 3B	A6NEH6	TMEM247	transmembrane protein 247							P35998	PSMC2	proteasome 26S subunit, ATPase 2
Q6NTF9	RHBDD2	rhomboid domain containing 2				P31323	PRKAR2B	protein kinase cAMP-dependent type II regulatory subunit beta	Q969X2	ST6GALNAC6	ST6 N-acetylgalactosaminide alpha-2,6-sialyltransferase 6							Q5SQI0	ATAT1	alpha tubulin acetyltransferase 1
Q14315	FLNC	filamin C				Q14031	COL4A6	collagen type IV alpha 6 chain	Q9Y547	HSPB11	Intraflagellar transport protein 25 homolog (Heat shock protein beta-11) (Hspb11) (Placental protein 25) (PP25)							Q96G74	OTUD5	OTU deubiquitinase 5
A0A0A6YYG3	TRBV6-8	T cell receptor beta variable 6-8				Q1W4C9	SPINK13	serine peptidase inhibitor Kazal type 13	Q9UKX7	NUP50	nucleoporin 50							Q9NYA3	GOLGA6A	golgin A6 family member A
P03923	MT-ND6	mitochondrially encoded NADH:ubiquinone oxidoreductase core subunit 6				O43822	CFAP410	cilia and flagella associated protein 410	Q14244	MAP7	microtubule associated protein 7							Q8NBF2	NHLRC2	NHL repeat containing 2
Q08257	CRYZ	crystallin zeta				O95196	CSPG5	chondroitin sulfate proteoglycan 5	Q96T17	MAP7D2	MAP7 domain containing 2							Q9NZJ6	COQ3	coenzyme Q3, methyltransferase
P55061	TMBIM6	transmembrane BAX inhibitor motif containing 6				Q9UIF9	BAZ2A	bromodomain adjacent to zinc finger domain 2A	Q8N7Z5	ANKRD31	ankyrin repeat domain 31							Q99489	DDO	D-aspartate oxidase
P50897	PPT1	palmitoyl-protein thioesterase 1				Q8NCE2	MTMR14	myotubularin related protein 14	Q9BZE3	BARHL1	BarH like homeobox 1							Q6UB99	ANKRD11	ankyrin repeat domain containing 11
Q9UK23	NAGPA	N-acetylglucosamine-1-phosphodiester alpha-N-acetylglucosaminidase				Q96L94	SNX22	sorting nexin 22	Q8IUH2	CREG2	cellular repressor of E1A stimulated genes 2							Q07617	SPAG1	sperm associated antigen 1
A0A2R8YEG4	OR2A1	olfactory receptor family 2 subfamily A member 1				Q96IK0	TMEM101	transmembrane protein 101	Q2TBE0	CWF19L2	CWF19 like cell cycle control factor 2							Q9P2B7	CFAP97	cilia and flagella associated protein 97
Q9UIU6	SIX4	SIX homeobox 4				Q9UNP4	ST3GAL5	ST3 beta-galactoside alpha-2,3-sialyltransferase 5	P52597	HNRNPF	heterogeneous nuclear ribonucleoprotein F							P43268	ETV4	ETS variant transcription factor 4
P05413	FABP3	fatty acid binding protein 3				O43156	TTI1	TELO2 interacting protein 1	O75886	STAM2	signal transducing adaptor molecule 2							A9QM74	KPNA7	karyopherin subunit alpha 7
P13798	APEH	acylaminoacyl-peptide hydrolase				Q9UNX4	WDR3	WD repeat domain 3	Q6P4E1	GOLM2	golgi membrane protein 2							P01601	IGKV1D-16	immunoglobulin kappa variable 1D-16
P15309	ACP3	acid phosphatase 3				Q7Z745	MROH2B	maestro heat like repeat family member 2B	Q92781	RDH5	retinol dehydrogenase 5							Q02040	AKAP17A	A-kinase anchoring protein 17A
Q8NG83	OR2M3	olfactory receptor family 2 subfamily M member 3				Q8IWR1	TRIM59	tripartite motif containing 59	Q8IWB7	WDFY1	WD repeat and FYVE domain containing 1							Q5VVC0	SPO16	Protein SPO16 homolog (Synaptonemal complex reinforcing element)
Q86Z02	HIPK1	homeodomain interacting protein kinase 1				Q02241	KIF23	kinesin family member 23	O00716	E2F3	E2F transcription factor 3							Q9H342	OR51J1	olfactory receptor family 51 subfamily J member 1
Q02779	MAP3K10	mitogen-activated protein kinase kinase kinase 10				P22303	ACHE	acetylcholinesterase (Cartwright blood group)	P03905	MT-ND4	mitochondrially encoded NADH:ubiquinone oxidoreductase core subunit 4							Q15119	PDK2	pyruvate dehydrogenase kinase 2
Q8NGD5	OR4K14	olfactory receptor family 4 subfamily K member 14				Q49A33	ZNF876P	zinc finger protein 876, pseudogene	P03886	MT-ND1	mitochondrially encoded NADH:ubiquinone oxidoreductase core subunit 1							P30531	SLC6A1	solute carrier family 6 member 1
Q9HAV7	GRPEL1	GrpE like 1, mitochondrial				Q92766	RREB1	ras responsive element binding protein 1	Q8TBM8	DNAJB14	DnaJ heat shock protein family (Hsp40) member B14							Q92185	ST8SIA1	ST8 alpha-N-acetyl-neuraminide alpha-2,8-sialyltransferase 1
A0A5B0	TRBV14	T cell receptor beta variable 14				Q5JPB2	ZNF831	zinc finger protein 831	O75179	ANKRD17	ankyrin repeat domain 17							Q9H0F7	ARL6	ADP ribosylation factor like GTPase 6
Q9NYB0	TERF2IP	TERF2 interacting protein				Q969F1	GTF3C6	general transcription factor IIIC subunit 6	Q2NKX8	ERCC6L	ERCC excision repair 6 like, spindle assembly checkpoint helicase							P17342	NPR3	natriuretic peptide receptor 3
Q9HBK9	AS3MT	arsenite methyltransferase				Q9H930	SP140L	SP140 nuclear body protein like	O43763	TLX2	T cell leukemia homeobox 2							P56179	DLX6	distal-less homeobox 6
Q8NFZ0	FBH1	F-box DNA helicase 1				Q8WXH2	JPH3	junctophilin 3	A0A0K2S4Q6	CD300H	CD300H molecule (gene/pseudogene)							Q16558	KCNMB1	potassium calcium-activated channel subfamily M regulatory beta subunit 1
O76000	OR2B3	olfactory receptor family 2 subfamily B member 3				Q7Z4P5	GDF7	growth differentiation factor 7	Q5JT25	RAB41	RAB41, member RAS oncogene family							Q86T65	DAAM2	dishevelled associated activator of morphogenesis 2
Q6P4F2	FDX2	ferredoxin 2				Q9UHA3	RSL24D1	ribosomal L24 domain containing 1	Q9UJC5	SH3BGRL2	SH3 domain binding glutamate rich protein like 2							Q9NPJ1	MKKS	MKKS centrosomal shuttling protein
Q8NH16	OR2L2	olfactory receptor family 2 subfamily L member 2				Q86UP6	CUZD1	CUB and zona pellucida like domains 1	Q96DZ7	TM4SF19	transmembrane 4 L six family member 19							P50591	TNFSF10	TNF superfamily member 10
Q7RTY7	OVCH1	ovochymase 1				Q93086	P2RX5	purinergic receptor P2X 5	Q96GW9	MARS2	methionyl-tRNA synthetase 2, mitochondrial							Q9Y2Z9	COQ6	coenzyme Q6, monooxygenase
Q9Y2L1	DIS3	DIS3 homolog, exosome endoribonuclease and 3'-5' exoribonuclease				Q15937	ZNF79	zinc finger protein 79	Q9NUQ6	SPATS2L	spermatogenesis associated serine rich 2 like							Q9Y6A9	SPCS1	signal peptidase complex subunit 1
Q15391	P2RY14	purinergic receptor P2Y14				Q14435	GALNT3	polypeptide N-acetylgalactosaminyltransferase 3	P78410	BTN3A2	butyrophilin subfamily 3 member A2							Q13409	DYNC1I2	dynein cytoplasmic 1 intermediate chain 2
P43626	KIR2DL1	killer cell immunoglobulin like receptor, two Ig domains and long cytoplasmic tail 1				Q15036	SNX17	sorting nexin 17	Q12926	ELAVL2	ELAV like RNA binding protein 2							P61019	RAB2A	RAB2A, member RAS oncogene family
A1L157	TSPAN11	tetraspanin 11				O00451	GFRA2	GDNF family receptor alpha 2	Q9NQC1	JADE2	jade family PHD finger 2							O43598	DNPH1	2'-deoxynucleoside 5'-phosphate N-hydrolase 1
Q9BYU1	PBX4	PBX homeobox 4				Q12996	CSTF3	cleavage stimulation factor subunit 3	Q9BUK6	MSTO1	misato mitochondrial distribution and morphology regulator 1							Q2M243	CCDC27	coiled-coil domain containing 27
Q6W2J9	BCOR	BCL6 corepressor				Q14166	TTLL12	tubulin tyrosine ligase like 12	Q9UFD9	RIMBP3	RIMS binding protein 3							Q9Y543	HES2	hes family bHLH transcription factor 2
Q6P3X8	PGBD2	piggyBac transposable element derived 2				Q6P1L6	ZNF343	zinc finger protein 343	Q6XR72	SLC30A10	solute carrier family 30 member 10							P40616	ARL1	ADP ribosylation factor like GTPase 1
Q8TET4	GANC	glucosidase alpha, neutral C				Q9UQD0	SCN8A	sodium voltage-gated channel alpha subunit 8	P67775	PPP2CA	protein phosphatase 2 catalytic subunit alpha							Q9HBA0	TRPV4	transient receptor potential cation channel subfamily V member 4
O14745	SLC9A3R1	Na(+)/H(+) exchange regulatory cofactor NHE-RF1 (NHERF-1) (Ezrin-radixin-moesin-binding phosphoprotein 50) (EBP50) (Regulatory cofactor of Na(+)/H(+) exchanger) (Sodium-hydrogen exchanger regulatory factor 1) (Solute carrier family 9 isoform A3 regulatory factor 1)				O15231	ZNF185	zinc finger protein 185 with LIM domain	Q9H0U6	MRPL18	mitochondrial ribosomal protein L18							Q7Z4S6	KIF21A	kinesin family member 21A
Q9H3Z4	DNAJC5	DnaJ heat shock protein family (Hsp40) member C5				Q96H55	MYO19	myosin XIX	Q8IZM9	SLC38A6	solute carrier family 38 member 6							Q15853	USF2	upstream transcription factor 2, c-fos interacting
P09917	ALOX5	arachidonate 5-lipoxygenase				Q15070	OXA1L	OXA1L mitochondrial inner membrane protein	Q9UG63	ABCF2	ATP binding cassette subfamily F member 2							Q96DA6	DNAJC19	DnaJ heat shock protein family (Hsp40) member C19
Q9NQZ7	ENTPD7	ectonucleoside triphosphate diphosphohydrolase 7				Q5CZA5	ZNF805	zinc finger protein 805	Q92963	RIT1	Ras like without CAAX 1							Q8WY07	SLC7A3	solute carrier family 7 member 3
P07199	CENPB	centromere protein B				Q6PI98	INO80C	INO80 complex subunit C	Q9GZR2	REXO4	REX4 homolog, 3'-5' exonuclease							O95153	TSPOAP1	TSPO associated protein 1
Q86UE6	LRRTM1	leucine rich repeat transmembrane neuronal 1				P55075	FGF8	fibroblast growth factor 8	Q5T7V8	GORAB	golgin, RAB6 interacting							P0DPF3	NBPF9	NBPF member 9
O95445	APOM	apolipoprotein M				Q9BRB3	PIGQ	phosphatidylinositol glycan anchor biosynthesis class Q	Q6UWY5	OLFML1	olfactomedin like 1							P25189	MPZ	myelin protein zero
Q96BM1	ANKRD9	ankyrin repeat domain 9				Q04609	FOLH1	folate hydrolase 1	O00241	SIRPB1	signal regulatory protein beta 1							O60393	NOBOX	NOBOX oogenesis homeobox
A6NI61	MYMK	myomaker, myoblast fusion factor				A0PJX2	TLDC2	TBC/LysM-associated domain containing 2	Q8NA58	PNLDC1	PARN like ribonuclease domain containing exonuclease 1							Q92805	GOLGA1	golgin A1
P48147	PREP	prolyl endopeptidase				Q76KX8	ZNF534	zinc finger protein 534	Q8WZ71	TMEM158	transmembrane protein 158							Q96LW2	RSKR	ribosomal protein S6 kinase related
Q9Y277	VDAC3	voltage dependent anion channel 3				Q96PV6	LENG8	leukocyte receptor cluster member 8	O14730	RIOK3	RIO kinase 3							Q5SWH9	TMEM69	transmembrane protein 69
Q96QH2	PRAM1	PML-RARA regulated adaptor molecule 1				O00303	EIF3F	eukaryotic translation initiation factor 3 subunit F	Q7Z4H7	HAUS6	HAUS augmin like complex subunit 6							Q9UPS8	ANKRD26	ankyrin repeat domain containing 26
A0A0G2JMS6		Ovostatin				Q15155	NOMO1	NODAL modulator 1	Q5HYK7	SH3D19	SH3 domain containing 19							Q14258	TRIM25	tripartite motif containing 25
P53778	MAPK12	mitogen-activated protein kinase 12				Q5VY43	PEAR1	platelet endothelial aggregation receptor 1	O15409	FOXP2	forkhead box P2							A0A0B4J262	TRAV8-6	T cell receptor alpha variable 8-6
P43088	PTGFR	prostaglandin F receptor				Q9BWH6	RPAP1	RNA polymerase II associated protein 1	Q06547	GABPB1	GA binding protein transcription factor subunit beta 1							Q8TBZ6	TRMT10A	tRNA methyltransferase 10A
P31995	FCGR2C	Fc gamma receptor IIc (gene/pseudogene)				Q3KQZ1	SLC25A35	solute carrier family 25 member 35	Q6UWV6	ENPP7	ectonucleotide pyrophosphatase/phosphodiesterase 7							Q96H35	RBM18	RNA binding motif protein 18
Q01726	MC1R	melanocortin 1 receptor				P35498	SCN1A	sodium voltage-gated channel alpha subunit 1	P24311	COX7B	cytochrome c oxidase subunit 7B							O15235	MRPS12	mitochondrial ribosomal protein S12
A8MUX0	KRTAP16-1	keratin associated protein 16-1				P05129	PRKCG	protein kinase C gamma	Q05193	DNM1	dynamin 1							P30041	PRDX6	peroxiredoxin 6
Q8N5R6	CCDC33	coiled-coil domain containing 33				Q7L4E1	MIGA2	mitoguardin 2	Q6S8J3	POTEE	POTE ankyrin domain family member E							P28065	PSMB9	proteasome 20S subunit beta 9
Q8NH79	OR6X1	olfactory receptor family 6 subfamily X member 1				Q99766	DMAC2L	distal membrane arm assembly component 2 like	P19419	ELK1	ETS transcription factor ELK1							P62304	SNRPE	small nuclear ribonucleoprotein polypeptide E
P49914	MTHFS	methenyltetrahydrofolate synthetase				P33260	CYP2C18	cytochrome P450 family 2 subfamily C member 18	P21579	SYT1	synaptotagmin 1							P11836	MS4A1	membrane spanning 4-domains A1
Q96D53	COQ8B	coenzyme Q8B				Q96LC7	SIGLEC10	sialic acid binding Ig like lectin 10	A0A1W2PS18	PMIS2	PMIS2 transmembrane protein							P09017	HOXC4	homeobox C4
P49862	KLK7	kallikrein related peptidase 7				Q9NW64	RBM22	RNA binding motif protein 22	A6NNN8	SLC38A8	solute carrier family 38 member 8							Q5J8M3	EMC4	ER membrane protein complex subunit 4
Q06546	GABPA	GA binding protein transcription factor subunit alpha				Q12918	KLRB1	killer cell lectin like receptor B1	Q3BBV2	NBPF8	NBPF member 8							Q96F10	SAT2	spermidine/spermine N1-acetyltransferase family member 2
O15205	UBD	ubiquitin D				Q9H1J7	WNT5B	Wnt family member 5B	Q9Y2J4	AMOTL2	angiomotin like 2							Q8N5J4	SPIC	Spi-C transcription factor
Q8WVQ1	CANT1	calcium activated nucleotidase 1				Q86WB0	ZC3HC1	zinc finger C3HC-type containing 1	Q92918	MAP4K1	mitogen-activated protein kinase kinase kinase kinase 1							P09237	MMP7	matrix metallopeptidase 7
Q9H4Y5	GSTO2	glutathione S-transferase omega 2				P42336	PIK3CA	phosphatidylinositol-4,5-bisphosphate 3-kinase catalytic subunit alpha	P22570	FDXR	ferredoxin reductase							Q7RTS7	KRT74	keratin 74
Q6Q0C1	SLC25A47	solute carrier family 25 member 47				Q9NY35	CLDND1	claudin domain containing 1	P30536	TSPO	translocator protein							Q9UEU0	VTI1B	vesicle transport through interaction with t-SNAREs 1B
Q9HCR9	PDE11A	phosphodiesterase 11A				P26599	PTBP1	polypyrimidine tract binding protein 1	Q8TAU0	NKX2-3	NK2 homeobox 3							O14994	SYN3	synapsin III
Q14656	TMEM187	transmembrane protein 187				P0CG31	ZNF286B	zinc finger protein 286B (pseudogene)	Q8N2H3	PYROXD2	pyridine nucleotide-disulphide oxidoreductase domain 2							Q5TFQ8	SIRPB1	signal regulatory protein beta 1
Q9BXF9	TEKT3	tektin 3				Q8WV37	ZNF480	zinc finger protein 480	P47813	EIF1AX	eukaryotic translation initiation factor 1A X-linked							Q9NXU5	ARL15	ADP ribosylation factor like GTPase 15
Q96F25	ALG14	ALG14 UDP-N-acetylglucosaminyltransferase subunit				P60509	ERVPABLB-1	endogenous retrovirus group PABLB member 1, envelope	Q9NZN9	AIPL1	aryl hydrocarbon receptor interacting protein like 1							Q9Y6K9	IKBKG	inhibitor of nuclear factor kappa B kinase regulatory subunit gamma
Q9NPA0	EMC7	ER membrane protein complex subunit 7				Q9H1K4	SLC25A18	solute carrier family 25 member 18	O75177	SS18L1	SS18L1 subunit of BAF chromatin remodeling complex							Q96G03	PGM2	phosphoglucomutase 2
A0A075B6Q5	IGHV3-64	immunoglobulin heavy variable 3-64				Q96A65	EXOC4	exocyst complex component 4	Q8NBZ0	INO80E	INO80 complex subunit E							Q9NP61	ARFGAP3	ADP ribosylation factor GTPase activating protein 3
A0A1B0GTI8	TMEM272	transmembrane protein 272				Q13769	THOC5	THO complex subunit 5	Q9NPI5	NMRK2	nicotinamide riboside kinase 2							Q7Z7B0	FILIP1	filamin A interacting protein 1
P59542	TAS2R19	taste 2 receptor member 19				Q8TDL5	BPIFB1	BPI fold containing family B member 1	Q9NSP4	CENPM	centromere protein M							O43677	NDUFC1	NADH:ubiquinone oxidoreductase subunit C1
P55854	SUMO3	small ubiquitin like modifier 3				Q6ZVT6	CFAP20DC	CFAP20 domain containing	Q5U5Q3	MEX3C	mex-3 RNA binding family member C							Q9H4E5	RHOJ	ras homolog family member J
Q7Z7H3	CATIP	ciliogenesis associated TTC17 interacting protein				Q5SXM1	ZNF678	zinc finger protein 678	Q6AHZ1	ZNF518A	zinc finger protein 518A							P78332	RBM6	RNA binding motif protein 6
O95006	OR2F2	olfactory receptor family 2 subfamily F member 2				Q6DN04	MIF	macrophage migration inhibitory factor	Q8N100	ATOH7	atonal bHLH transcription factor 7							P51817	PRKX	protein kinase cAMP-dependent X-linked catalytic subunit
Q16539	MAPK14	mitogen-activated protein kinase 14				M0QZC1	RNF225	ring finger protein 225	Q9H2M3	BHMT2	betaine--homocysteine S-methyltransferase 2							A0A0B4J1Z2	IGKV1D-43	immunoglobulin kappa variable 1D-43
Q8N0V5	GCNT2	glucosaminyl (N-acetyl) transferase 2 (I blood group)				Q8N3J6	CADM2	cell adhesion molecule 2	Q07687	DLX2	distal-less homeobox 2							O95484	CLDN9	claudin 9
Q9P2E5	CHPF2	chondroitin polymerizing factor 2				Q6NZY4	ZCCHC8	zinc finger CCHC-type containing 8	Q12840	KIF5A	kinesin family member 5A							P53985	SLC16A1	solute carrier family 16 member 1
Q8NEV1	CSNK2A3	casein kinase 2 alpha 3				O95954	FTCD	formimidoyltransferase cyclodeaminase	Q86VW1	SLC22A16	solute carrier family 22 member 16							Q13950	RUNX2	RUNX family transcription factor 2
Q9H3F6	KCTD10	potassium channel tetramerization domain containing 10				E7ERA6	RNF223	ring finger protein 223	Q9HCD5	NCOA5	nuclear receptor coactivator 5							P09105	HBQ1	hemoglobin subunit theta 1
Q7Z3D4	LYSMD3	LysM domain containing 3				Q9BRP0	OVOL2	ovo like zinc finger 2	Q6IE81	JADE1	jade family PHD finger 1							Q9H9L3	ISG20L2	interferon stimulated exonuclease gene 20 like 2
Q96JC1	VPS39	VPS39 subunit of HOPS complex				Q9HBE1	PATZ1	POZ/BTB and AT hook containing zinc finger 1	Q05682	CALD1	caldesmon 1							Q92820	GGH	gamma-glutamyl hydrolase
Q7RTY3	PRSS45P	serine protease 45, pseudogene				Q8NEM0	MCPH1	microcephalin 1	P15907	ST6GAL1	ST6 beta-galactoside alpha-2,6-sialyltransferase 1							Q6VB84	FOXD4L3	forkhead box D4 like 3
Q9NRZ7	AGPAT3	1-acylglycerol-3-phosphate O-acyltransferase 3				Q9HB14	KCNK13	potassium two pore domain channel subfamily K member 13	Q06136	KDSR	3-ketodihydrosphingosine reductase							P62269	RPS18	ribosomal protein S18
P04062	GBA1	glucosylceramidase beta 1				O60711	LPXN	leupaxin	P09104	ENO2	enolase 2							Q6IQ23	PLEKHA7	pleckstrin homology domain containing A7
P0C628	OR5AC1	olfactory receptor family 5 subfamily AC member 1 (gene/pseudogene)				P19474	TRIM21	tripartite motif containing 21	Q96H12	MSANTD3	Myb/SANT DNA binding domain containing 3							Q96I24	FUBP3	far upstream element binding protein 3
O94910	ADGRL1	adhesion G protein-coupled receptor L1				Q6ZMY9	ZNF517	zinc finger protein 517	Q15744	CEBPE	CCAAT enhancer binding protein epsilon							Q15319	POU4F3	POU class 4 homeobox 3
Q9UHK6	AMACR	alpha-methylacyl-CoA racemase				Q96NU0	CNTNAP3B	contactin associated protein family member 3B	Q8N2H4	SYS1	SYS1 golgi trafficking protein							P50549	ETV1	ETS variant transcription factor 1
Q9BU70	TRMO	tRNA methyltransferase O				O15105	SMAD7	SMAD family member 7	A0A0C4DH34	IGHV4-28	immunoglobulin heavy variable 4-28							Q969J3	BORCS5	BLOC-1 related complex subunit 5
P11229	CHRM1	cholinergic receptor muscarinic 1				O60336	MAPKBP1	mitogen-activated protein kinase binding protein 1	Q9BX46	RBM24	RNA binding motif protein 24							Q6ZVM7	TOM1L2	target of myb1 like 2 membrane trafficking protein
Q8NGC7	OR11H6	olfactory receptor family 11 subfamily H member 6				O95631	NTN1	netrin 1	Q8NEF3	CCDC112	coiled-coil domain containing 112							Q96BD0	SLCO4A1	solute carrier organic anion transporter family member 4A1
P57058	HUNK	hormonally up-regulated Neu-associated kinase				Q96NG5	ZNF558	zinc finger protein 558	P17483	HOXB4	homeobox B4							P35240	NF2	NF2, moesin-ezrin-radixin like (MERLIN) tumor suppressor
Q9HAP6	LIN7B	lin-7 homolog B, crumbs cell polarity complex component				Q9H892	TTC12	tetratricopeptide repeat domain 12	Q5H9K5	ZMAT1	zinc finger matrin-type 1							Q8TE04	PANK1	pantothenate kinase 1
P07237	P4HB	prolyl 4-hydroxylase subunit beta				P47874	OMP	olfactory marker protein	O75420	GIGYF1	GRB10 interacting GYF protein 1							Q15329	E2F5	E2F transcription factor 5
P01766	IGHV3-13	immunoglobulin heavy variable 3-13				O43290	SART1	spliceosome associated factor 1, recruiter of U4/U6.U5 tri-snRNP	Q9Y6D9	MAD1L1	mitotic arrest deficient 1 like 1							P01834	IGKC	immunoglobulin kappa constant
Q9Y5Y3	GPR45	G protein-coupled receptor 45				Q8N4T0	CPA6	carboxypeptidase A6	A0A075B6J6	IGLV3-22	immunoglobulin lambda variable 3-22							P04156	PRNP	prion protein
P08648	ITGA5	integrin subunit alpha 5				Q9GIP4	SLC7A5P2	solute carrier family 7 member 5 pseudogene 2	O60784	TOM1	target of myb1 membrane trafficking protein							P12111	COL6A3	collagen type VI alpha 3 chain
P28221	HTR1D	5-hydroxytryptamine receptor 1D				Q8NB15	ZNF511	zinc finger protein 511	A2NJV5	IGKV2-29	immunoglobulin kappa variable 2-29							Q93062	RBPMS	RNA binding protein, mRNA processing factor
Q96D09	GPRASP2	G protein-coupled receptor associated sorting protein 2				P11511	CYP19A1	cytochrome P450 family 19 subfamily A member 1	Q86XE5	HOGA1	4-hydroxy-2-oxoglutarate aldolase 1							Q14957	GRIN2C	glutamate ionotropic receptor NMDA type subunit 2C
P35858	IGFALS	insulin like growth factor binding protein acid labile subunit				Q8IU89	CERS3	ceramide synthase 3	O14683	TP53I11	tumor protein p53 inducible protein 11							Q8WXU2	DNAAF4	dynein axonemal assembly factor 4
Q9NX38	ABITRAM	actin binding transcription modulator				Q495B1	ANKDD1A	ankyrin repeat and death domain containing 1A	Q15637	SF1	splicing factor 1							Q96S44	TP53RK	TP53 regulating kinase
P21731	TBXA2R	thromboxane A2 receptor				Q8TEM1	NUP210	nucleoporin 210	A0A2R8Y7D0	TINCR	TINCR ubiquitin domain containing							P00439	PAH	phenylalanine hydroxylase
Q86SG7	LYG2	lysozyme g2				O43731	KDELR3	KDEL endoplasmic reticulum protein retention receptor 3	Q5SZJ8	BEND6	BEN domain containing 6							Q6ZUX3	TOGARAM2	TOG array regulator of axonemal microtubules 2
Q7RTV2	GSTA5	glutathione S-transferase alpha 5				Q8N7C7	RNF148	ring finger protein 148	Q9NQ75	CASS4	Cas scaffold protein family member 4							Q8IWB1	ITPRIP	inositol 1,4,5-trisphosphate receptor interacting protein
Q5VVH5	IRAK1BP1	interleukin 1 receptor associated kinase 1 binding protein 1				Q9UBW8	COPS7A	COP9 signalosome subunit 7A	O75449	KATNA1	katanin catalytic subunit A1							P16403	H1-2	H1.2 linker histone, cluster member
Q8NGT1	OR2K2	olfactory receptor family 2 subfamily K member 2				O75129	ASTN2	astrotactin 2	Q86TG7	PEG10	paternally expressed 10							Q13112	CHAF1B	chromatin assembly factor 1 subunit B
Q9H741	SPRING1	SREBF pathway regulator in golgi 1				Q13888	GTF2H2	general transcription factor IIH subunit 2	Q13761	RUNX3	RUNX family transcription factor 3							Q9NWW6	NMRK1	nicotinamide riboside kinase 1
Q9BYT8	NLN	neurolysin				P01871	IGHM	immunoglobulin heavy constant mu	Q9Y2D1	ATF5	activating transcription factor 5							P20020	ATP2B1	ATPase plasma membrane Ca2+ transporting 1
P12544	GZMA	granzyme A				O00175	CCL24	C-C motif chemokine ligand 24	Q6PML9	SLC30A9	solute carrier family 30 member 9							Q8IYS0	GRAMD1C	GRAM domain containing 1C
Q8N165	PDIK1L	PDLIM1 interacting kinase 1 like				Q93097	WNT2B	Wnt family member 2B	O95989	NUDT3	nudix hydrolase 3							Q0P6D6	CCDC15	coiled-coil domain containing 15
Q9UNQ0	ABCG2	ATP binding cassette subfamily G member 2 (Junior blood group)				Q96QZ7	MAGI1	membrane associated guanylate kinase, WW and PDZ domain containing 1	Q8N4X5	AFAP1L2	actin filament associated protein 1 like 2							P83731	RPL24	ribosomal protein L24
A0A0B4J245	TRAV12-1	T cell receptor alpha variable 12-1				Q5GH72	XKR7	XK related 7	Q96AE4	FUBP1	far upstream element binding protein 1							Q8WUR7	C15orf40	chromosome 15 open reading frame 40
Q7L523	RRAGA	Ras related GTP binding A				Q8NA66	CNBD1	cyclic nucleotide binding domain containing 1	O00142	TK2	thymidine kinase 2							Q12846	STX4	syntaxin 4
Q9P0G3	KLK14	kallikrein related peptidase 14				Q9H4Z3	PCIF1	phosphorylated CTD interacting factor 1	Q9UJA9	ENPP5	ectonucleotide pyrophosphatase/phosphodiesterase family member 5							Q9NQX3	GPHN	gephyrin
Q96I23	PYURF	PIGY upstream open reading frame				A0A0U1RRI6	CENPVL3	centromere protein V like 3	Q8NCS4	TMEM35B	transmembrane protein 35B							Q14596	NBR1	NBR1 autophagy cargo receptor
A6NHG9	OR5H14	olfactory receptor family 5 subfamily H member 14				P46779	RPL28	ribosomal protein L28	Q9HB20	PLEKHA3	pleckstrin homology domain containing A3							P52272	HNRNPM	heterogeneous nuclear ribonucleoprotein M
O60688	YPEL1	yippee like 1				Q8ND23	CARMIL3	capping protein regulator and myosin 1 linker 3	Q7Z4V5	HDGFL2	HDGF like 2							Q9H2Y9	SLCO5A1	solute carrier organic anion transporter family member 5A1
Q5VYV7	SLX4IP	SLX4 interacting protein				O95260	ATE1	arginyltransferase 1	P55851	UCP2	uncoupling protein 2							P62942	FKBP1A	FKBP prolyl isomerase 1A
Q8NHS4	CLHC1	clathrin heavy chain linker domain containing 1				Q8NB46	ANKRD52	ankyrin repeat domain 52	Q9UHA2	SS18L2	SS18 like 2							O00743	PPP6C	protein phosphatase 6 catalytic subunit
Q96NI6	LRFN5	leucine rich repeat and fibronectin type III domain containing 5				P05451	REG1A	regenerating family member 1 alpha	P12980	LYL1	LYL1 basic helix-loop-helix family member							P50553	ASCL1	achaete-scute family bHLH transcription factor 1
Q9GZT9	EGLN1	egl-9 family hypoxia inducible factor 1				Q9Y2L8	ZKSCAN5	zinc finger with KRAB and SCAN domains 5	Q99583	MNT	MAX network transcriptional repressor							P78367	NKX3-2	NK3 homeobox 2
P43304	GPD2	glycerol-3-phosphate dehydrogenase 2				Q4U2R6	MRPL51	mitochondrial ribosomal protein L51	Q13889	GTF2H3	general transcription factor IIH subunit 3							P24310	COX7A1	cytochrome c oxidase subunit 7A1
A6NDG6	PGP	phosphoglycolate phosphatase				Q9ULW3	ABT1	activator of basal transcription 1	Q04743	EMX2	empty spiracles homeobox 2							Q8N2I9	STK40	serine/threonine kinase 40
Q8WTS1	ABHD5	abhydrolase domain containing 5, lysophosphatidic acid acyltransferase				Q9H2U9	ADAM7	ADAM metallopeptidase domain 7	Q92904	DAZL	deleted in azoospermia like							Q96D71	REPS1	RALBP1 associated Eps domain containing 1
Q9UNA3	A4GNT	alpha-1,4-N-acetylglucosaminyltransferase				Q9NQG7	HPS4	HPS4 biogenesis of lysosomal organelles complex 3 subunit 2	O15479	MAGEB2	MAGE family member B2							Q6KB66	KRT80	keratin 80
Q9Y2D2	SLC35A3	solute carrier family 35 member A3				Q8N431	RASGEF1C	RasGEF domain family member 1C	Q5SZL2	CEP85L	centrosomal protein 85 like							O14490	DLGAP1	DLG associated protein 1
P49792	RANBP2	RAN binding protein 2				P26927	MST1	macrophage stimulating 1	A2A3L6	TTC24	tetratricopeptide repeat domain 24							A6NMB9	FIGNL2	fidgetin like 2
P61981	YWHAG	tyrosine 3-monooxygenase/tryptophan 5-monooxygenase activation protein gamma				A6NDP7	MYADML2	myeloid associated differentiation marker like 2	Q8NHV5	MOSMO	modulator of smoothened							A6NCN8	TEX52	testis expressed 52
Q8NGX2	OR2T35	olfactory receptor family 2 subfamily T member 35				Q8NB50	ZFP62	ZFP62 zinc finger protein	Q8ND56	LSM14A	LSM14A mRNA processing body assembly factor							P31150	GDI1	GDP dissociation inhibitor 1
Q9BW85	YJU2	YJU2 splicing factor homolog				Q9UDX4	SEC14L3	SEC14 like lipid binding 3	P58012	FOXL2	forkhead box L2							P12931	SRC	SRC proto-oncogene, non-receptor tyrosine kinase
Q9Y5A7	NUB1	negative regulator of ubiquitin like proteins 1				Q9NY37	ASIC5	acid sensing ion channel subunit family member 5	Q96NG3	ODAD4	outer dynein arm docking complex subunit 4							Q8N2F6	ARMC10	armadillo repeat containing 10
Q9NY56	OBP2A	odorant binding protein 2A				Q86YV0	RASAL3	RAS protein activator like 3	Q9BTA9	WAC	WW domain containing adaptor with coiled-coil							Q8N159	NAGS	N-acetylglutamate synthase
Q63HM1	AFMID	arylformamidase				Q9HB29	IL1RL2	interleukin 1 receptor like 2	Q9NW13	RBM28	RNA binding motif protein 28							Q7Z6P3	RAB44	RAB44, member RAS oncogene family
Q96RB7	OR5M11	olfactory receptor family 5 subfamily M member 11				P59998	ARPC4	actin related protein 2/3 complex subunit 4	P51170	SCNN1G	sodium channel epithelial 1 subunit gamma							O60237	PPP1R12B	protein phosphatase 1 regulatory subunit 12B
Q8NGF1	OR52R1	olfactory receptor family 52 subfamily R member 1				O75342	ALOX12B	arachidonate 12-lipoxygenase, 12R type	Q9UHI5	SLC7A8	solute carrier family 7 member 8							Q6UWV2	MPZL3	myelin protein zero like 3
Q96LB1	MRGPRX2	MAS related GPR family member X2				Q9BZV1	UBXN6	UBX domain protein 6	Q8N136	DAW1	dynein assembly factor with WD repeats 1							Q06055	ATP5MC2	ATP synthase membrane subunit c locus 2
Q99895	CTRC	chymotrypsin C				Q9Y2K7	KDM2A	lysine demethylase 2A	P46976	GYG1	glycogenin 1							O60245	PCDH7	protocadherin 7
O00625	PIR	pirin				Q14746	COG2	component of oligomeric golgi complex 2	Q9NTZ6	RBM12	RNA binding motif protein 12							Q9P2B4	CTTNBP2NL	CTTNBP2 N-terminal like
Q96S90	LYSMD1	LysM domain containing 1				Q5R3K3	CALHM6	calcium homeostasis modulator family member 6	Q6NXT1	ANKRD54	ankyrin repeat domain 54							A6NNM3	RIMBP3B	RIMS binding protein 3B
Q9H825	METTL8	methyltransferase 8, tRNA N3-cytidine				A0A494C0Z2	SPDYE13	speedy/RINGO cell cycle regulator family member E13	O95340	PAPSS2	3'-phosphoadenosine 5'-phosphosulfate synthase 2							P49720	PSMB3	proteasome 20S subunit beta 3
Q5VXJ0	LIPK	lipase family member K				B2RXF0	TMEM229A	transmembrane protein 229A	P02794	FTH1	ferritin heavy chain 1							O95861	BPNT1	3'(2'), 5'-bisphosphate nucleotidase 1
Q9H1N7	SLC35B3	solute carrier family 35 member B3				Q8IWD4	CCDC117	coiled-coil domain containing 117	Q6IA17	SIGIRR	single Ig and TIR domain containing							Q7Z388	DPY19L4	dpy-19 like 4
Q99788	CMKLR1	chemerin chemokine-like receptor 1				Q8N2G6	ZCCHC24	zinc finger CCHC-type containing 24	Q9ULA0	DNPEP	aspartyl aminopeptidase							A6NKD9	CCDC85C	coiled-coil domain containing 85C
A6NDV4	TMEM8B	transmembrane protein 8B				Q8WW27	APOBEC4	apolipoprotein B mRNA editing enzyme catalytic polypeptide like 4	Q9UHQ4	BCAP29	B cell receptor associated protein 29							Q9BSE4	HERPUD2	HERPUD family member 2
Q86WA6	BPHL	biphenyl hydrolase like				Q99062	CSF3R	colony stimulating factor 3 receptor	Q8NES3	LFNG	LFNG O-fucosylpeptide 3-beta-N-acetylglucosaminyltransferase							Q330K2	NDUFAF6	NADH:ubiquinone oxidoreductase complex assembly factor 6
Q9BQQ3	GORASP1	golgi reassembly stacking protein 1				Q9UHP3	USP25	ubiquitin specific peptidase 25	Q8IVF6	ANKRD18A	ankyrin repeat domain 18A							Q69YI7	NAIF1	nuclear apoptosis inducing factor 1
Q8N162	OR8H2	olfactory receptor family 8 subfamily H member 2				Q15195	PLGLA	plasminogen like A (pseudogene)	P36871	PGM1	phosphoglucomutase 1							Q10587	TEF	TEF transcription factor, PAR bZIP family member
Q07817	BCL2L1	BCL2 like 1				O60858	TRIM13	tripartite motif containing 13	O75419	CDC45	cell division cycle 45							A6NI86	GOLGA6L10	golgin A6 family like 10
A6NC97	FAM172BP	Putative protein FAM172B (FAM172B pseudogene)				Q9BX95	SGPP1	sphingosine-1-phosphate phosphatase 1	Q14774	HLX	H2.0 like homeobox							Q6NYC8	PPP1R18	protein phosphatase 1 regulatory subunit 18
P48145	NPBWR1	neuropeptides B and W receptor 1				Q9NPC7	MYNN	myoneurin	Q8TEC5	SH3RF2	SH3 domain containing ring finger 2							P55072	VCP	valosin containing protein
Q8NGS7	OR13C8	olfactory receptor family 13 subfamily C member 8				Q9H9S5	FKRP	fukutin related protein	P21854	CD72	CD72 molecule							Q9BQI3	EIF2AK1	eukaryotic translation initiation factor 2 alpha kinase 1
Q15067	ACOX1	acyl-CoA oxidase 1				Q9NP79	VTA1	vesicle trafficking 1	Q16559	TAL2	TAL bHLH transcription factor 2							P51571	SSR4	signal sequence receptor subunit 4
Q9BWU0	SLC4A1AP	solute carrier family 4 member 1 adaptor protein				O60507	TPST1	tyrosylprotein sulfotransferase 1	Q9NXL2	ARHGEF38	Rho guanine nucleotide exchange factor 38							Q9BZW2	SLC13A1	solute carrier family 13 member 1
P36542	ATP5F1C	ATP synthase F1 subunit gamma				P41208	CETN2	centrin 2	Q9Y2C5	SLC17A4	solute carrier family 17 member 4							O43934	MFSD11	major facilitator superfamily domain containing 11
Q6IFN5	OR7E24	olfactory receptor family 7 subfamily E member 24				O95760	IL33	interleukin 33	Q5SQ80	ANKRD20A2P	ankyrin repeat domain 20 family member A2, pseudogene							Q01664	TFAP4	transcription factor AP-4
Q8NH54	OR56A3	olfactory receptor family 56 subfamily A member 3				P14866	HNRNPL	heterogeneous nuclear ribonucleoprotein L	Q9Y618	NCOR2	nuclear receptor corepressor 2							Q9ULL8	SHROOM4	shroom family member 4
P32238	CCKAR	cholecystokinin A receptor				Q9UJS0	SLC25A13	solute carrier family 25 member 13	Q9BYV8	CEP41	centrosomal protein 41							Q96IU4	ABHD14B	abhydrolase domain containing 14B
Q13427	PPIG	peptidylprolyl isomerase G				Q8IUE6	H2AC21	H2A clustered histone 21	Q9BPW4	APOL4	apolipoprotein L4							Q9BSR8	YIPF4	Yip1 domain family member 4
Q6PCB7	SLC27A1	solute carrier family 27 member 1				P14649	MYL6B	myosin light chain 6B	Q7Z3Q1	SLC46A3	solute carrier family 46 member 3							Q9Y5C1	ANGPTL3	angiopoietin like 3
P0DTU4	TRB	T cell receptor beta locus				P35243	RCVRN	recoverin	P98198	ATP8B2	ATPase phospholipid transporting 8B2							Q5SRI9	MANEA	mannosidase endo-alpha
P02766	TTR	transthyretin				Q17RG1	KCTD19	potassium channel tetramerization domain containing 19	Q9NW97	TMEM51	transmembrane protein 51							P60953	CDC42	cell division cycle 42
P14921	ETS1	ETS proto-oncogene 1, transcription factor				Q14493	SLBP	stem-loop histone mRNA binding protein	Q92485	SMPDL3B	sphingomyelin phosphodiesterase acid like 3B							Q7RTP6	MICAL3	microtubule associated monooxygenase, calponin and LIM domain containing 3
Q8NH41	OR4K15	olfactory receptor family 4 subfamily K member 15				Q7L945	ZNF627	zinc finger protein 627	Q9HBL8	NMRAL1	NmrA like redox sensor 1							P16455	MGMT	O-6-methylguanine-DNA methyltransferase
Q13309	SKP2	S-phase kinase associated protein 2				P98173	FAM3A	FAM3 metabolism regulating signaling molecule A	A0A0B4J240	TRAV10	T cell receptor alpha variable 10							Q5BJF6	ODF2	outer dense fiber of sperm tails 2
Q9UBU8	MORF4L1	mortality factor 4 like 1				B5MD39	GGTLC3	gamma-glutamyltransferase light chain family member 3	O15127	SCAMP2	secretory carrier membrane protein 2							Q6UX07	DHRS13	dehydrogenase/reductase 13
Q8NGR4	OR5C1	olfactory receptor family 5 subfamily C member 1				Q96FW1	OTUB1	OTU deubiquitinase, ubiquitin aldehyde binding 1	Q9Y6Y0	IVNS1ABP	influenza virus NS1A binding protein							Q695T7	SLC6A19	solute carrier family 6 member 19
Q9GZK3	OR2B2	olfactory receptor family 2 subfamily B member 2				Q9NW75	GPATCH2	G-patch domain containing 2	Q8N8F6	YIPF7	Yip1 domain family member 7							Q8TF21	ANKRD24	ankyrin repeat domain 24
Q9P296	C5AR2	complement C5a receptor 2				P78562	PHEX	phosphate regulating endopeptidase X-linked	Q9Y236	OSGIN2	oxidative stress induced growth inhibitor family member 2							P46100	ATRX	ATRX chromatin remodeler
Q9UBM4	OPTC	opticin				P81133	SIM1	SIM bHLH transcription factor 1	A4D1S5	RAB19	RAB19, member RAS oncogene family							P22223	CDH3	cadherin 3
P43119	PTGIR	prostaglandin I2 receptor				P02749	APOH	apolipoprotein H	Q8TF68	ZNF384	zinc finger protein 384							P22309	UGT1A1	UDP glucuronosyltransferase family 1 member A1
Q8NGH9	OR52E4	olfactory receptor family 52 subfamily E member 4				Q9Y5X9	LIPG	lipase G, endothelial type	Q96T83	SLC9A7	solute carrier family 9 member A7							O43236	SEPTIN4	septin 4
Q01892	SPIB	Spi-B transcription factor				P61086	UBE2K	ubiquitin conjugating enzyme E2 K	Q9NX95	SYBU	syntabulin							O43924	PDE6D	phosphodiesterase 6D
P35372	OPRM1	opioid receptor mu 1				O75077	ADAM23	ADAM metallopeptidase domain 23	O15269	SPTLC1	serine palmitoyltransferase long chain base subunit 1							D6RGH6	MCIDAS	multiciliate differentiation and DNA synthesis associated cell cycle protein
Q7Z4G1	COMMD6	COMM domain containing 6				P14207	FOLR2	folate receptor beta	P38432	COIL	coilin							Q149N8	SHPRH	SNF2 histone linker PHD RING helicase
Q96I13	ABHD8	abhydrolase domain containing 8				Q8N6D2	RNF182	ring finger protein 182	Q9Y238	DLEC1	DLEC1 cilia and flagella associated protein							A8MZ59	LEUTX	leucine twenty homeobox
Q9GZP9	DERL2	derlin 2				Q9BV35	SLC25A23	solute carrier family 25 member 23	Q8IX12	CCAR1	cell division cycle and apoptosis regulator 1							Q15723	ELF2	E74 like ETS transcription factor 2
Q24JQ0	TMEM241	transmembrane protein 241				A0A087WXS9	TBC1D3I	TBC1 domain family member 3I	Q9Y5E1	PCDHB9	protocadherin beta 9							Q9BV73	CEP250	centrosomal protein 250
Q49B96	COX19	cytochrome c oxidase assembly factor COX19				A6NHY2	ANKDD1B	ankyrin repeat and death domain containing 1B	P62955	CACNG7	calcium voltage-gated channel auxiliary subunit gamma 7							O43396	TXNL1	thioredoxin like 1
P0C629	OR10J4	olfactory receptor family 10 subfamily J member 4 (gene/pseudogene)				Q9H8U3	ZFAND3	zinc finger AN1-type containing 3	Q99836	MYD88	MYD88 innate immune signal transduction adaptor							P05165	PCCA	propionyl-CoA carboxylase subunit alpha
Q6JVE9	LCN8	lipocalin 8				Q96FA3	PELI1	pellino E3 ubiquitin protein ligase 1	Q9Y6I7	WSB1	WD repeat and SOCS box containing 1							Q8NF67	ANKRD20A12P	ankyrin repeat domain 20 family member A12, pseudogene
Q8NGK9	OR5D16	olfactory receptor family 5 subfamily D member 16				Q9UHJ3	SFMBT1	Scm like with four mbt domains 1	Q16576	RBBP7	RB binding protein 7, chromatin remodeling factor							Q8N8A6	DDX51	DEAD-box helicase 51
Q9UNN5	FAF1	Fas associated factor 1				Q8WWK9	CKAP2	cytoskeleton associated protein 2	Q16625	OCLN	occludin							Q9NS37	CREBZF	CREB/ATF bZIP transcription factor
O43240	KLK10	kallikrein related peptidase 10				Q05DH4	FHIP1A	FHF complex subunit HOOK interacting protein 1A	Q32P41	TRMT5	tRNA methyltransferase 5							P0C024	NUDT7	nudix hydrolase 7
A1IGU5	ARHGEF37	Rho guanine nucleotide exchange factor 37				P08183	ABCB1	ATP binding cassette subfamily B member 1	Q9H7N4	SCAF1	SR-related CTD associated factor 1							P12270	TPR	translocated promoter region, nuclear basket protein
Q8WUU5	GATAD1	GATA zinc finger domain containing 1				Q9BSB4	ATG101	autophagy related 101	Q96CT7	CCDC124	coiled-coil domain containing 124							Q96IM9	DYDC2	DPY30 domain containing 2
Q9H3N8	HRH4	histamine receptor H4				O60645	EXOC3	exocyst complex component 3	P12035	KRT3	keratin 3							P98175	RBM10	RNA binding motif protein 10
Q8NGE9	OR9Q2	olfactory receptor family 9 subfamily Q member 2				Q9P255	ZNF492	zinc finger protein 492	A0PJE2	DHRS12	dehydrogenase/reductase 12							Q9H0C8	ILKAP	ILK associated serine/threonine phosphatase
Q3ZCT8	KBTBD12	kelch repeat and BTB domain containing 12				Q76KD6	SPATC1	spermatogenesis and centriole associated 1	P04430	IGKV1-16	immunoglobulin kappa variable 1-16							Q9BRS2	RIOK1	RIO kinase 1
Q9H339	OR51B5	olfactory receptor family 51 subfamily B member 5				Q8N594	MPND	MPN domain containing	Q8TAZ6	CMTM2	CKLF like MARVEL transmembrane domain containing 2							Q6P2C8	MED27	mediator complex subunit 27
P02689	PMP2	peripheral myelin protein 2				Q9GZX5	ZNF350	zinc finger protein 350	O75874	IDH1	isocitrate dehydrogenase (NADP(+)) 1							O43414	ERI3	ERI1 exoribonuclease family member 3
Q16570	ACKR1	atypical chemokine receptor 1 (Duffy blood group)				Q92502	STARD8	StAR related lipid transfer domain containing 8	Q99729	HNRNPAB	heterogeneous nuclear ribonucleoprotein A/B							P22083	FUT4	fucosyltransferase 4
P19237	TNNI1	troponin I1, slow skeletal type				A0A1B0GTQ1		Cytochrome P450 family 2 subfamily D member 6	P04433	IGKV3-11	immunoglobulin kappa variable 3-11							Q14833	GRM4	glutamate metabotropic receptor 4
O15169	AXIN1	axin 1				Q6IMI6	SULT1C3	sulfotransferase family 1C member 3	Q9H553	ALG2	ALG2 alpha-1,3/1,6-mannosyltransferase							A0A075B6H8	IGKV1D-42	immunoglobulin kappa variable 1D-42 (non-functional)
Q9P0J0	NDUFA13	NADH:ubiquinone oxidoreductase subunit A13				Q9HCS5	EPB41L4A	erythrocyte membrane protein band 4.1 like 4A	Q52MB2	CCDC184	coiled-coil domain containing 184							O60284	ST18	ST18 C2H2C-type zinc finger transcription factor
P49753	ACOT2	acyl-CoA thioesterase 2				P82673	MRPS35	mitochondrial ribosomal protein S35	O14494	PLPP1	phospholipid phosphatase 1							Q96FE7	PIK3IP1	phosphoinositide-3-kinase interacting protein 1
Q6U736	OPN5	opsin 5				A0PJX0	CIB4	calcium and integrin binding family member 4	P33981	TTK	TTK protein kinase							Q8N7Z2	GOLGA6L1	golgin A6 family like 1
Q99487	PAFAH2	platelet activating factor acetylhydrolase 2				Q9UNS2	COPS3	COP9 signalosome subunit 3	P35504	UGT1A5	UDP glucuronosyltransferase family 1 member A5							Q8N5A5	ZGPAT	zinc finger CCCH-type and G-patch domain containing
Q9BXW7	HDHD5	haloacid dehalogenase like hydrolase domain containing 5				O43257	ZNHIT1	zinc finger HIT-type containing 1	Q9NR31	SAR1A	secretion associated Ras related GTPase 1A							Q9Y603	ETV7	ETS variant transcription factor 7
Q9H4L4	SENP3	SUMO specific peptidase 3				Q9Y2C2	UST	uronyl 2-sulfotransferase	Q8N8E3	CEP112	centrosomal protein 112							P52945	PDX1	pancreatic and duodenal homeobox 1
Q9NRZ5	AGPAT4	1-acylglycerol-3-phosphate O-acyltransferase 4				P32754	HPD	4-hydroxyphenylpyruvate dioxygenase	Q2QD12	RPEL1	ribulose-5-phosphate-3-epimerase like 1							Q96PL5	ERMAP	erythroblast membrane associated protein (Scianna blood group)
O60551	NMT2	N-myristoyltransferase 2				Q9UNZ2	NSFL1C	NSFL1 cofactor	P80748	IGLV3-21	immunoglobulin lambda variable 3-21							P52756	RBM5	RNA binding motif protein 5
Q5FYA8	ARSH	arylsulfatase family member H				Q2M389	WASHC4	WASH complex subunit 4	Q96QF0	RAB3IP	RAB3A interacting protein							Q9H3H9	TCEAL2	transcription elongation factor A like 2
Q9H0U3	MAGT1	magnesium transporter 1				P49747	COMP	cartilage oligomeric matrix protein	Q86UF2	CTAGE6	CTAGE family member 6							Q7Z794	KRT77	keratin 77
Q8IYB8	SUPV3L1	Suv3 like RNA helicase				Q9NP62	GCM1	glial cells missing transcription factor 1	Q9BQE5	APOL2	apolipoprotein L2							P20702	ITGAX	integrin subunit alpha X
Q9Y4B6	DCAF1	DDB1 and CUL4 associated factor 1				Q92830	KAT2A	lysine acetyltransferase 2A	Q13610	PWP1	PWP1 homolog, endonuclein							Q6ZMS7	ZNF783	zinc finger protein 783
O94868	FCHSD2	FCH and double SH3 domains 2				Q8NFD2	ANKK1	ankyrin repeat and kinase domain containing 1	Q02548	PAX5	paired box 5							Q9HD47	RANGRF	RAN guanine nucleotide release factor
P0CB48	UBTFL6	UBTF like 6 (pseudogene)				Q15835	GRK1	G protein-coupled receptor kinase 1	Q9NWV8	BABAM1	BRISC and BRCA1 A complex member 1							Q96GX9	APIP	APAF1 interacting protein
P58181	OR10A3	olfactory receptor family 10 subfamily A member 3				Q6PCB8	EMB	embigin	Q96F24	NRBF2	nuclear receptor binding factor 2							Q9NSY1	BMP2K	BMP2 inducible kinase
Q8NGP6	OR5M8	olfactory receptor family 5 subfamily M member 8				Q9BRD0	BUD13	BUD13 homolog	Q96E40	SPACA9	sperm acrosome associated 9							Q9BVI0	PHF20	PHD finger protein 20
P51671	CCL11	C-C motif chemokine ligand 11				Q9H4W6	EBF3	EBF transcription factor 3	P25092	GUCY2C	guanylate cyclase 2C							Q9H082	RAB33B	RAB33B, member RAS oncogene family
Q96R27	OR2M4	olfactory receptor family 2 subfamily M member 4				Q8NI32	LYPD6B	LY6/PLAUR domain containing 6B	P56748	CLDN8	claudin 8							Q9H0E9	BRD8	bromodomain containing 8
Q9Y365	STARD10	StAR related lipid transfer domain containing 10				A8MVW0	FAM171A2	family with sequence similarity 171 member A2	Q9Y606	PUS1	pseudouridine synthase 1							Q05940	SLC18A2	solute carrier family 18 member A2
Q13976	PRKG1	protein kinase cGMP-dependent 1				Q9NRG4	SMYD2	SET and MYND domain containing 2	P46109	CRKL	CRK like proto-oncogene, adaptor protein							P18850	ATF6	activating transcription factor 6
Q6PI78	TMEM65	transmembrane protein 65				Q9Y4C4	MFHAS1	multifunctional ROCO family signaling regulator 1	A6NCS4	NKX2-6	NK2 homeobox 6							P36406	TRIM23	tripartite motif containing 23
Q8NFN8	GPR156	G protein-coupled receptor 156				Q68DI1	ZNF776	zinc finger protein 776	Q9C0B2	CFAP74	cilia and flagella associated protein 74							O75496	GMNN	geminin DNA replication inhibitor
Q96R72	OR4K3	olfactory receptor family 4 subfamily K member 3 (gene/pseudogene)				Q02318	CYP27A1	cytochrome P450 family 27 subfamily A member 1	P62330	ARF6	ADP ribosylation factor 6							A0A0B4J248	TRAV1-1	T cell receptor alpha variable 1-1
Q5JTY5	ZNG1C	Zn regulated GTPase metalloprotein activator 1C				Q03169	TNFAIP2	TNF alpha induced protein 2	Q14206	RCAN2	regulator of calcineurin 2							A6NIM6	SLC15A5	solute carrier family 15 member 5
Q9NRR2	TPSG1	tryptase gamma 1				Q5VVB8	TMEM244	transmembrane protein 244	Q01826	SATB1	SATB homeobox 1							Q9NQP4	PFDN4	prefoldin subunit 4
Q9NQZ3	DAZ1	deleted in azoospermia 1				Q9UEF7	KL	klotho	P00480	OTC	ornithine transcarbamylase							Q2VIQ3	KIF4B	kinesin family member 4B
Q6S5H5	POTEG	POTE ankyrin domain family member G				Q7L5N1	COPS6	COP9 signalosome subunit 6	Q8IYM0	FAM186B	family with sequence similarity 186 member B							P31267	HOXA6	homeobox A6
Q8N8R5	C2orf69	chromosome 2 open reading frame 69				Q8TBP0	TBC1D16	TBC1 domain family member 16	O75508	CLDN11	claudin 11							Q9NP85	NPHS2	NPHS2 stomatin family member, podocin
P53611	RABGGTB	Rab geranylgeranyltransferase subunit beta				Q8N5P1	ZC3H8	zinc finger CCCH-type containing 8	P41162	ETV3	ETS variant transcription factor 3							O15294	OGT	O-linked N-acetylglucosamine (GlcNAc) transferase
Q15208	STK38	serine/threonine kinase 38				Q9UPU5	USP24	ubiquitin specific peptidase 24	O76082	SLC22A5	solute carrier family 22 member 5							A6NJZ7	RIMBP3C	RIMS binding protein 3C
Q99527	GPER1	G protein-coupled estrogen receptor 1				Q96JH8	RADIL	Rap associating with DIL domain	P80217	IFI35	interferon induced protein 35							P31249	HOXD3	homeobox D3
Q9UKU7	ACAD8	acyl-CoA dehydrogenase family member 8				B2RUY7	VWC2L	von Willebrand factor C domain containing 2 like	Q86UP2	KTN1	kinectin 1							B6SEH8	ERVV-1	endogenous retrovirus group V member 1, envelope
Q9NRQ2	PLSCR4	phospholipid scramblase 4				Q9H2G4	TSPYL2	TSPY like 2	P26038	MSN	moesin							P35548	MSX2	msh homeobox 2
Q8NH92	OR1S1	olfactory receptor family 1 subfamily S member 1				Q8N0X7	SPART	spartin	Q96QS6	PSKH2	protein serine kinase H2							P35637	FUS	FUS RNA binding protein
Q9H4I8	SERHL2	serine hydrolase like 2				Q9HCK8	CHD8	chromodomain helicase DNA binding protein 8	Q9NPZ5	B3GAT2	beta-1,3-glucuronyltransferase 2							P17980	PSMC3	proteasome 26S subunit, ATPase 3
Q8NHC7	OR14C36	olfactory receptor family 14 subfamily C member 36				P26358	DNMT1	DNA methyltransferase 1	Q8NBL1	POGLUT1	protein O-glucosyltransferase 1							Q8IYJ3	SYTL1	synaptotagmin like 1
Q8NI35	PATJ	PATJ crumbs cell polarity complex component				A8MZ26	EFCAB9	EF-hand calcium binding domain 9	P13349	MYF5	myogenic factor 5							P07195	LDHB	lactate dehydrogenase B
O14530	TXNDC9	thioredoxin domain containing 9				Q9BXU7	USP26	ubiquitin specific peptidase 26	Q8IWA4	MFN1	mitofusin 1							Q5TAG4	NBPF12	NBPF member 12
A0A087WV62	TRBV16	T cell receptor beta variable 16				O95273	CCNDBP1	cyclin D1 binding protein 1	Q9Y5Q3	MAFB	MAF bZIP transcription factor B							Q13002	GRIK2	glutamate ionotropic receptor kainate type subunit 2
P07148	FABP1	fatty acid binding protein 1				Q8N103	TAGAP	T cell activation RhoGTPase activating protein	Q6ZQN7	SLCO4C1	solute carrier organic anion transporter family member 4C1							A0A0B4J277	TRAV22	T cell receptor alpha variable 22
P47901	AVPR1B	arginine vasopressin receptor 1B				Q96G25	MED8	mediator complex subunit 8	Q96E22	NUS1	NUS1 dehydrodolichyl diphosphate synthase subunit							Q8WUZ0	BCL7C	BAF chromatin remodeling complex subunit BCL7C
Q8NGV7	OR5H2	olfactory receptor family 5 subfamily H member 2				Q9P2S6	ANKMY1	ankyrin repeat and MYND domain containing 1	P56750	CLDN17	claudin 17							Q8NHW3	MAFA	MAF bZIP transcription factor A
P33908	MAN1A1	mannosidase alpha class 1A member 1				Q9H254	SPTBN4	spectrin beta, non-erythrocytic 4	Q96ED9	HOOK2	hook microtubule tethering protein 2							Q86XA0	METTL23	methyltransferase 23, arginine
Q14439	GPR176	G protein-coupled receptor 176				P15391	CD19	CD19 molecule	Q9P2W9	STX18	syntaxin 18							P28358	HOXD10	homeobox D10
O43824	GTPBP6	GTP binding protein 6 (putative)				Q499Z3	SLFNL1	schlafen like 1	Q9NZQ7	CD274	CD274 molecule							Q9Y2Q9	MRPS28	mitochondrial ribosomal protein S28
Q99679	GPR21	G protein-coupled receptor 21				Q7Z2E3	APTX	aprataxin	Q9P1A2	PPP4R1L	protein phosphatase 4 regulatory subunit 1 like (pseudogene)							P68402	PAFAH1B2	platelet activating factor acetylhydrolase 1b catalytic subunit 2
Q8IWQ3	BRSK2	BR serine/threonine kinase 2				Q8TDM5	SPACA4	sperm acrosome associated 4	Q8WVZ7	RNF133	ring finger protein 133							P58743	SLC26A5	solute carrier family 26 member 5
Q9NRH1	YAE1	YAE1 maturation factor of ABCE1				Q9BSK4	FEM1A	fem-1 homolog A	O60502	OGA	O-GlcNAcase							Q9UF02	CACNG5	calcium voltage-gated channel auxiliary subunit gamma 5
Q96RT1	ERBIN	erbb2 interacting protein				Q6UXZ4	UNC5D	unc-5 netrin receptor D	O94805	ACTL6B	actin like 6B							P16949	STMN1	stathmin 1
P35348	ADRA1A	adrenoceptor alpha 1A				Q9P2D8	UNC79	unc-79 homolog, NALCN channel complex subunit	Q4KMZ8	NKAIN1	sodium/potassium transporting ATPase interacting 1							P62851	RPS25	ribosomal protein S25
O95221	OR5F1	olfactory receptor family 5 subfamily F member 1				O75592	MYCBP2	MYC binding protein 2	Q01064	PDE1B	phosphodiesterase 1B							Q5T2R2	PDSS1	decaprenyl diphosphate synthase subunit 1
Q13686	ALKBH1	alkB homolog 1, histone H2A dioxygenase				Q9H8Y8	GORASP2	golgi reassembly stacking protein 2	P20264	POU3F3	POU class 3 homeobox 3							Q86T03	PIP4P1	phosphatidylinositol-4,5-bisphosphate 4-phosphatase 1
Q6EBC2	IL31	interleukin 31				O60447	EVI5	ecotropic viral integration site 5	A0A1B0GV03	GOLGA6L7	golgin A6 family like 7							Q6PHW0	IYD	iodotyrosine deiodinase
Q9H2U2	PPA2	inorganic pyrophosphatase 2				Q9BTC8	MTA3	metastasis associated 1 family member 3	A6NML5	TMEM212	transmembrane protein 212							Q6Q0C0	TRAF7	TNF receptor associated factor 7
Q9H347	UBQLN3	ubiquilin 3				Q96N38	ZNF714	zinc finger protein 714	Q9BV36	MLPH	melanophilin							Q5TGI4	SAMD5	sterile alpha motif domain containing 5
Q9UNA1	ARHGAP26	Rho GTPase activating protein 26				Q6L8Q7	PDE12	phosphodiesterase 12	A7XYQ1	SOBP	sine oculis binding protein homolog							Q9Y666	SLC12A7	solute carrier family 12 member 7
P0DMS8	ADORA3	adenosine A3 receptor				P08684	CYP3A4	cytochrome P450 family 3 subfamily A member 4	O14511	NRG2	neuregulin 2							O76011	KRT34	keratin 34
Q68CR7	LRRC66	leucine rich repeat containing 66				Q6NVV9	ADAM5	ADAM metallopeptidase domain 5 (pseudogene)	Q6UXH0	ANGPTL8	angiopoietin like 8							Q13043	STK4	serine/threonine kinase 4
Q6IF36	OR8G2P	olfactory receptor family 8 subfamily G member 2 pseudogene				Q9UM13	ANAPC10	anaphase promoting complex subunit 10	Q9NZJ9	NUDT4	nudix hydrolase 4							P31270	HOXA11	homeobox A11
P24855	DNASE1	deoxyribonuclease 1				Q96JJ3	ELMO2	engulfment and cell motility 2	O43439	CBFA2T2	CBFA2/RUNX1 partner transcriptional co-repressor 2							A6NI15	MSGN1	mesogenin 1
Q96C23	GALM	galactose mutarotase				Q9UMX6	GUCA1B	guanylate cyclase activator 1B	Q9BXJ1	C1QTNF1	C1q and TNF related 1							Q96E17	RAB3C	RAB3C, member RAS oncogene family
A8MYV0	DCDC2C	doublecortin domain containing 2C				Q16670	ZSCAN26	zinc finger and SCAN domain containing 26	P60174	TPI1	triosephosphate isomerase 1							Q8IYJ2	C10orf67	chromosome 10 open reading frame 67
Q8WVM7	STAG1	STAG1 cohesin complex component				Q6R2W3	ZBED9	SCAN domain-containing protein 3 (Transposon-derived Buster4 transposase-like protein) (Zinc finger BED domain-containing protein 9)	Q16719	KYNU	kynureninase							Q9UI40	SLC24A2	solute carrier family 24 member 2
Q96LW7	CARD19	caspase recruitment domain family member 19				A6NNV3	SPDYE16	speedy/RINGO cell cycle regulator family member E16	O15405	TOX3	TOX high mobility group box family member 3							P84103	SRSF3	serine and arginine rich splicing factor 3
O14829	PPEF1	protein phosphatase with EF-hand domain 1				P02774	GC	GC vitamin D binding protein	A0A0B4J2H0	IGHV1-69D	immunoglobulin heavy variable 1-69D							P49589	CARS1	cysteinyl-tRNA synthetase 1
Q86WA8	LONP2	lon peptidase 2, peroxisomal				P00797	REN	renin	Q86T23	CROCCP2	CROCC pseudogene 2							Q9H5Q4	TFB2M	transcription factor B2, mitochondrial
Q92876	KLK6	kallikrein related peptidase 6				P78317	RNF4	ring finger protein 4	Q14469	HES1	hes family bHLH transcription factor 1							Q9Y5I7	CLDN16	claudin 16
P48039	MTNR1A	melatonin receptor 1A				P20472	PVALB	parvalbumin	Q674R7	ATG9B	autophagy related 9B							Q13491	GPM6B	glycoprotein M6B
Q9HAC7	SUGCT	succinyl-CoA:glutarate-CoA transferase				Q9NZ45	CISD1	CDGSH iron sulfur domain 1	Q8NEP7	KLHDC9	kelch domain containing 9							P54619	PRKAG1	protein kinase AMP-activated non-catalytic subunit gamma 1
P48506	GCLC	glutamate-cysteine ligase catalytic subunit				Q8IYW4	ENTHD1	ENTH domain containing 1	Q9HAW8	UGT1A10	UDP glucuronosyltransferase family 1 member A10							P61020	RAB5B	RAB5B, member RAS oncogene family
O75783	RHBDL1	rhomboid like 1				Q96PC2	IP6K3	inositol hexakisphosphate kinase 3	Q13451	FKBP5	FKBP prolyl isomerase 5							Q9UI12	ATP6V1H	ATPase H+ transporting V1 subunit H
Q9UKX5	ITGA11	integrin subunit alpha 11				Q8IWK6	ADGRA3	adhesion G protein-coupled receptor A3	P20700	LMNB1	lamin B1							Q5XLA6	CARD17P	caspase recruitment domain family member 17, pseudogene
Q5H9S7	DCAF17	DDB1 and CUL4 associated factor 17				Q8IZ20	ZNF683	zinc finger protein 683	O95567	C22orf31	chromosome 22 open reading frame 31							O76071	CIAO1	cytosolic iron-sulfur assembly component 1
O14640	DVL1	dishevelled segment polarity protein 1				Q86YB8	ERO1B	endoplasmic reticulum oxidoreductase 1 beta	O95076	ALX3	ALX homeobox 3							O75157	TSC22D2	TSC22 domain family member 2
Q8NGC2	OR4E2	olfactory receptor family 4 subfamily E member 2				Q5R387	PLA2G2C	phospholipase A2 group IIC	Q9H8N7	ZNF395	zinc finger protein 395							Q96D96	HVCN1	hydrogen voltage gated channel 1
Q99705	MCHR1	melanin concentrating hormone receptor 1				P22413	ENPP1	ectonucleotide pyrophosphatase/phosphodiesterase 1	O14503	BHLHE40	basic helix-loop-helix family member e40							P26378	ELAVL4	ELAV like RNA binding protein 4
Q8WUT4	LRRN4	leucine rich repeat neuronal 4				Q96PE6	ZIM3	zinc finger imprinted 3	P43403	ZAP70	zeta chain of T cell receptor associated protein kinase 70							Q7Z2Y5	NRK	Nik related kinase
Q9UBW5	BIN2	bridging integrator 2				Q13485	SMAD4	SMAD family member 4	Q9Y399	MRPS2	mitochondrial ribosomal protein S2							P51513	NOVA1	NOVA alternative splicing regulator 1
Q8NH00	OR2T4	olfactory receptor family 2 subfamily T member 4				Q9NYT0	PLEK2	pleckstrin 2	Q8IVD9	NUDCD3	NudC domain containing 3							O95382	MAP3K6	mitogen-activated protein kinase kinase kinase 6
Q9UJ68	MSRA	methionine sulfoxide reductase A				P60660	MYL6	myosin light chain 6	Q05519	SRSF11	serine and arginine rich splicing factor 11							Q9NRN5	OLFML3	olfactomedin like 3
Q9BV99	LRRC61	leucine rich repeat containing 61				Q96S97	MYADM	myeloid associated differentiation marker	Q96KP4	CNDP2	carnosine dipeptidase 2							Q9H6L4	ARMC7	armadillo repeat containing 7
Q7L0X0	TRIL	TLR4 interactor with leucine rich repeats				Q68CR1	SEL1L3	SEL1L family member 3	Q9UP95	SLC12A4	solute carrier family 12 member 4							P54368	OAZ1	ornithine decarboxylase antizyme 1
Q8NGE3	OR10P1	olfactory receptor family 10 subfamily P member 1				Q9Y6Q1	CAPN6	calpain 6	Q8NHP6	MOSPD2	motile sperm domain containing 2							Q99941	ATF6B	activating transcription factor 6 beta
Q96RD6	PANX2	pannexin 2				Q8NB42	ZNF527	zinc finger protein 527	Q9Y4G6	TLN2	talin 2							Q14964	RAB39A	RAB39A, member RAS oncogene family
Q96S96	PEBP4	phosphatidylethanolamine binding protein 4				Q15047	SETDB1	SET domain bifurcated histone lysine methyltransferase 1	O15522	NKX2-8	NK2 homeobox 8							O00291	HIP1	huntingtin interacting protein 1
O95665	NTSR2	neurotensin receptor 2				P14616	INSRR	insulin receptor related receptor	P43307	SSR1	signal sequence receptor subunit 1							P56746	CLDN15	claudin 15
Q9BUK0	CHCHD7	coiled-coil-helix-coiled-coil-helix domain containing 7				Q96JZ2	HSH2D	hematopoietic SH2 domain containing	Q8TCJ2	STT3B	STT3 oligosaccharyltransferase complex catalytic subunit B							G9CGD6	CNK3/IPCEF1	CNK3/IPCEF1 fusion protein
Q9UHJ6	SHPK	sedoheptulokinase				Q9H2A7	CXCL16	C-X-C motif chemokine ligand 16	Q12851	MAP4K2	mitogen-activated protein kinase kinase kinase kinase 2							Q68DC2	ANKS6	ankyrin repeat and sterile alpha motif domain containing 6
O75953	DNAJB5	DnaJ heat shock protein family (Hsp40) member B5				Q76N89	HECW1	HECT, C2 and WW domain containing E3 ubiquitin protein ligase 1	Q2M238	RRN3P1	RRN3 pseudogene 1							A1A5D9	BICDL2	BICD family like cargo adaptor 2
Q86W74	ANKRD46	ankyrin repeat domain 46				Q9ULB1	NRXN1	neurexin 1	Q8IYD1	GSPT2	G1 to S phase transition 2							Q9NZI8	IGF2BP1	insulin like growth factor 2 mRNA binding protein 1
P25686	DNAJB2	DnaJ heat shock protein family (Hsp40) member B2				Q86UK7	ZNF598	zinc finger protein 598, E3 ubiquitin ligase	Q6UXN7	TOMM20L	translocase of outer mitochondrial membrane 20 like							Q15270	NKX1-1	NK1 homeobox 1
Q13635	PTCH1	patched 1				O14958	CASQ2	calsequestrin 2	A0A0J9YXQ4	PNMA6E	PNMA family member 6E							Q9P2S5	WRAP73	WD repeat containing, antisense to TP73
O75821	EIF3G	eukaryotic translation initiation factor 3 subunit G				Q96T60	PNKP	polynucleotide kinase 3'-phosphatase	Q68CJ9	CREB3L3	cAMP responsive element binding protein 3 like 3							Q9H867	VCPKMT	valosin containing protein lysine methyltransferase
Q8IXL7	MSRB3	methionine sulfoxide reductase B3				Q86VK4	ZNF410	zinc finger protein 410	Q8NBM8	PCYOX1L	prenylcysteine oxidase 1 like							Q69YU3	ANKRD34A	ankyrin repeat domain 34A
Q8TD86	CALML6	calmodulin like 6				Q96GD3	SCMH1	Scm polycomb group protein homolog 1	P18085	ARF4	ADP ribosylation factor 4							Q7Z7A1	CNTRL	centriolin
Q9P2K6	KLHL42	kelch like family member 42				Q9NZJ7	MTCH1	mitochondrial carrier 1	Q99708	RBBP8	RB binding protein 8, endonuclease							Q6FH49	NNMT	nicotinamide N-methyltransferase
Q14330	GPR18	G protein-coupled receptor 18				A2RUB1	MEIOC	meiosis specific with coiled-coil domain	O43251	RBFOX2	RNA binding fox-1 homolog 2							P09493	TPM1	tropomyosin 1
Q9NQG6	MIEF1	mitochondrial elongation factor 1				Q6NUS6	TCTN3	tectonic family member 3	A6NLW8	DUXA	double homeobox A							Q9NTK5	OLA1	Obg like ATPase 1
P53609	PGGT1B	protein geranylgeranyltransferase type I subunit beta				Q6UX46	ALKAL2	ALK and LTK ligand 2	Q8IUZ0	LRRC49	leucine rich repeat containing 49							Q99801	NKX3-1	NK3 homeobox 1
Q5SRH9	TTC39A	tetratricopeptide repeat domain 39A				A4D1U4	DENND11	DENN domain containing 11	P62820	RAB1A	RAB1A, member RAS oncogene family							P07196	NEFL	neurofilament light chain
Q8NGF7	OR5B17	olfactory receptor family 5 subfamily B member 17				Q719I0	AHSA2P	activator of HSP90 ATPase homolog 2, pseudogene	Q9BV38	WDR18	WD repeat domain 18							Q8NER1	TRPV1	transient receptor potential cation channel subfamily V member 1
Q9NPF7	IL23A	interleukin 23 subunit alpha				Q9Y676	MRPS18B	mitochondrial ribosomal protein S18B	Q9NZC3	GDE1	glycerophosphodiester phosphodiesterase 1							O75147	OBSL1	obscurin like cytoskeletal adaptor 1
Q9BV94	EDEM2	ER degradation enhancing alpha-mannosidase like protein 2				Q96IK5	GMCL1	germ cell-less 1, spermatogenesis associated	Q06455	RUNX1T1	RUNX1 partner transcriptional co-repressor 1							Q14203	DCTN1	dynactin subunit 1
Q8WTU0	DDI1	DNA damage inducible 1 homolog 1				Q96BS2	TESC	tescalcin	O95343	SIX3	SIX homeobox 3							P20337	RAB3B	RAB3B, member RAS oncogene family
Q9BYS8	LRRC2	leucine rich repeat containing 2				Q8IZ21	PHACTR4	phosphatase and actin regulator 4	O60307	MAST3	microtubule associated serine/threonine kinase 3							Q96AZ1	EEF1AKMT3	EEF1A lysine methyltransferase 3
Q9UKK6	NXT1	nuclear transport factor 2 like export factor 1				Q9BRX5	GINS3	GINS complex subunit 3	O43709	BUD23	BUD23 rRNA methyltransferase and ribosome maturation factor							Q9H2B2	SYT4	synaptotagmin 4
P07327	ADH1A	alcohol dehydrogenase 1A (class I), alpha polypeptide				Q9HAE3	CLXN	calaxin	Q9BZK7	TBL1XR1	TBL1X/Y related 1							Q96HH4	TMEM169	transmembrane protein 169
O75638	CTAG2	cancer/testis antigen 2				Q13261	IL15RA	interleukin 15 receptor subunit alpha	Q96M60	FAM227B	family with sequence similarity 227 member B							Q71RG4	TMUB2	transmembrane and ubiquitin like domain containing 2
Q8TAC1	RFESD	Rieske Fe-S domain containing				P22888	LHCGR	luteinizing hormone/choriogonadotropin receptor	Q9BXX2	ANKRD30B	ankyrin repeat domain 30B							P49335	POU3F4	POU class 3 homeobox 4
Q9NU53	GINM1	glycosylated integral membrane protein 1				P16260	SLC25A16	solute carrier family 25 member 16	Q99608	NDN	necdin, MAGE family member							Q6P9H5	GIMAP6	GTPase, IMAP family member 6
Q9Y426	C2CD2	C2 calcium dependent domain containing 2				O43296	ZNF264	zinc finger protein 264	P54845	NRL	neural retina leucine zipper							Q9NZ72	STMN3	stathmin 3
Q8NGI2	OR52N4	olfactory receptor family 52 subfamily N member 4				Q6ZMP0	THSD4	thrombospondin type 1 domain containing 4	Q9NR50	EIF2B3	eukaryotic translation initiation factor 2B subunit gamma							Q96SL1	SLC49A4	solute carrier family 49 member 4
B6A8C7	TARM1	T cell-interacting, activating receptor on myeloid cells 1				O75144	ICOSLG	inducible T cell costimulator ligand	O95199	RCBTB2	RCC1 and BTB domain containing protein 2							Q9GZS0	DNAI2	dynein axonemal intermediate chain 2
Q9UHG0	DCDC2	doublecortin domain containing 2				Q8NEM2	SHCBP1	SHC binding and spindle associated 1	Q5T5S1	CCDC183	coiled-coil domain containing 183							Q9H171	ZBP1	Z-DNA binding protein 1
P62253	UBE2G1	ubiquitin conjugating enzyme E2 G1				A6NFQ2	TCAF2	TRPM8 channel associated factor 2	Q86VR2	RETREG3	reticulophagy regulator family member 3							Q15847	ADIRF	adipogenesis regulatory factor
A8MY62	LACTBL1	lactamase beta like 1				P50851	LRBA	LPS responsive beige-like anchor protein	Q8NBI5	SLC43A3	solute carrier family 43 member 3							O14735	CDIPT	CDP-diacylglycerol--inositol 3-phosphatidyltransferase
Q9UL42	PNMA2	PNMA family member 2				Q14999	CUL7	cullin 7	Q96FN9	DTD2	D-aminoacyl-tRNA deacylase 2							P42765	ACAA2	acetyl-CoA acyltransferase 2
O60512	B4GALT3	beta-1,4-galactosyltransferase 3				Q96BV0	ZNF775	zinc finger protein 775	H3BNL8	ARMH2	armadillo like helical domain containing 2							A6NDL7	METTL21EP	methyltransferase like 21E, pseudogene
P08294	SOD3	superoxide dismutase 3				Q5VV52	ZNF691	zinc finger protein 691	Q96K80	ZC3H10	zinc finger CCCH-type containing 10							Q86VP3	PACS2	phosphofurin acidic cluster sorting protein 2
O60884	DNAJA2	DnaJ heat shock protein family (Hsp40) member A2				Q8N183	NDUFAF2	NADH:ubiquinone oxidoreductase complex assembly factor 2	Q5DJT8	CT45A2	cancer/testis antigen family 45 member A2							P50993	ATP1A2	ATPase Na+/K+ transporting subunit alpha 2
P04066	FUCA1	alpha-L-fucosidase 1				P16591	FER	FER tyrosine kinase	Q9NP74	PALMD	palmdelphin							A8MTL0	IQCF5	IQ motif containing F5
Q9NYK5	MRPL39	mitochondrial ribosomal protein L39				Q6FIF0	ZFAND6	zinc finger AN1-type containing 6	Q9UJ70	NAGK	N-acetylglucosamine kinase							Q9Y5T4	DNAJC15	DnaJ heat shock protein family (Hsp40) member C15
Q8IZF2	ADGRF5	adhesion G protein-coupled receptor F5				O14896	IRF6	interferon regulatory factor 6	Q5T9A4	ATAD3B	ATPase family AAA domain containing 3B							Q9NTI7	INKA2	inka box actin regulator 2
[truncated: 5,984 more rows]
